# Supplementary material
Source: PubMed Central journal article supplement (PMC8325642)
Supplement: NIHMS1698257-supplement-Fig__4A__Dioxo.pdf [file NIHMS1698257-supplement-Fig__4A__Dioxo.pdf]

| Energy              | Mo Foil | nbkg        | Flat        | fbkg        | nder        | nsec        | H         | Energy | Dioxo-OSiPh2tBu | nbkg        | flat        | fbkg        | nder      | nsec      |
|---------------------|---------|-------------|-------------|-------------|-------------|-------------|-----------|--------|-----------------|-------------|-------------|-------------|-----------|-----------|
| 196.906.289.062.500 |         | 0.0027300   | 0.0027300   | 0.0027300   | 0.0027300   | -0.00023800 | 2,08E-01  | 19691  | 0.0017100       | 0.0017100   | 0.0017100   | 0.0017100   | -5,36E-01 | 6,49E-02  |
| 196.945.585.937.500 |         | 0.0017900   | 0.0017900   | 0.0017900   | 0.0017900   | -0.00015600 | 2,13E-01  | 19695  | 0.0015000       | 0.0015000   | 0.0015000   | 0.0015000   | -2,81E-01 | 5,40E-02  |
| 196.985.917.968.750 |         | 0.0014800   | 0.0014800   | 0.0014800   | 0.0014800   | -6,80E-01   | 1,22E-01  | 19699  | 0.0014900       | 0.0014900   | 0.0014900   | 0.0014900   | -1,06E-01 | 2,73E-04  |
| 197.026.269.531.250 |         | 0.0012400   | 0.0012400   | 0.0012400   | 0.0012400   | -5,79E-01   | 1,80E-02  | 19703  | 0.0014200       | 0.0014200   | 0.0014200   | 0.0014200   | -2,78E-01 | -2,77E-02 |
| 197.065.625.000.000 |         | 0.0010200   | 0.0010200   | 0.0010200   | 0.0010200   | -5,37E-01   | 1,83E-02  | 19707  | 0.0012700       | 0.0012700   | 0.0012700   | 0.0012700   | -3,26E-01 | -7,90E-03 |
| 197.106.015.625.000 |         | 0.00081400  | 0.00081400  | 0.00081400  | 0.00081400  | -4,33E-01   | 1,18E-02  | 19711  | 0.0011600       | 0.0011600   | 0.0011600   | 0.0011600   | -3,41E-01 | 9,10E-04  |
| 197.146.425.781.250 |         | 0.00067200  | 0.00067200  | 0.00067200  | 0.00067200  | -4,41E-01   | 6,60E-03  | 19715  | 0.00099100      | 0.00099100  | 0.00099100  | 0.00099100  | -3,19E-01 | 3,16E-02  |
| 197.185.800.781.250 |         | 0.00046200  | 0.00046200  | 0.00046200  | 0.00046200  | -3,81E-01   | 2,65E-02  | 19719  | 0.00090200      | 0.00090200  | 0.00090200  | 0.00090200  | -8,90E-02 | 1,77E-02  |
| 197.226.250.000.000 |         | 0.00036800  | 0.00036800  | 0.00036800  | 0.00036800  | -2,30E-01   | 2,13E-02  | 19723  | 0.00092000      | 0.00092000  | 0.00092000  | 0.00092000  | -1,78E-01 | -6,31E-02 |
| 197.265.664.062.500 |         | 0.00027900  | 0.00027900  | 0.00027900  | 0.00027900  | -2,10E-01   | 6,80E-03  | 19727  | 0.00075900      | 0.00075900  | 0.00075900  | 0.00075900  | -5,93E-01 | -3,66E-02 |
| 197.306.152.343.750 |         | 0.00020000  | 0.00020000  | 0.00020000  | 0.00020000  | -1,76E-01   | 1,10E-02  | 19731  | 0.00044600      | 0.00044600  | 0.00044600  | 0.00044600  | -4,70E-01 | 7,19E-02  |
| 197.345.605.468.750 |         | 0.00013800  | 0.00013800  | 0.00013800  | 0.00013800  | -1,22E-01   | -1,09E-03 | 19735  | 0.00038300      | 0.00038300  | 0.00038300  | 0.00038300  | -1,85E-02 | 4,79E-02  |
| 197.386.113.281.250 |         | 0.00010300  | 0.00010300  | 0.00010300  | 0.00010300  | -1,84E-01   | -9,98E-03 | 19739  | 0.00043100      | 0.00043100  | 0.00043100  | 0.00043100  | -8,77E-02 | -3,05E-02 |
| 197.425.585.937.500 |         | -9,36E-02   | -9,36E-02   | -9,36E-02   | -9,36E-02   | -2,02E-01   | 1,53E-02  | 19743  | 0.00031300      | 0.00031300  | 0.00031300  | 0.00031300  | -2,63E-01 | -2,99E-02 |
| 197.466.132.812.500 |         | -5,92E-01   | -5,92E-01   | -5,92E-01   | -5,92E-01   | -6,18E-02   | 1,07E-02  | 19747  | 0.00022100      | 0.00022100  | 0.00022100  | 0.00022100  | -3,27E-01 | -1,63E-02 |
| 197.505.644.531.250 |         | -5,88E-01   | -5,88E-01   | -5,88E-01   | -5,88E-01   | -1,17E-01   | -1,15E-02 | 19751  | 5,16E-01        | 5,16E-01    | 5,16E-01    | 5,16E-01    | -3,93E-01 | 3,59E-02  |
| 197.546.230.468.750 |         | -0.00015300 | -0.00015300 | -0.00015300 | -0.00015300 | -1,54E-01   | 7,83E-03  | 19755  | -9,38E-01       | -9,38E-01   | -9,38E-01   | -9,38E-01   | -3,97E-02 | 6,25E-02  |
| 197.585.781.250.000 |         | -0.00018200 | -0.00018200 | -0.00018200 | -0.00018200 | -5,39E-02   | 1,08E-02  | 19759  | 1,98E-01        | 1,98E-01    | 1,98E-01    | 1,98E-01    | 1,08E-01  | -2,23E-02 |
| 197.626.386.718.750 |         | -0.00019600 | -0.00019600 | -0.00019600 | -0.00019600 | -6,73E-02   | -6,08E-03 | 19763  | -7,16E-02       | -7,16E-02   | -7,16E-02   | -7,16E-02   | -2,19E-01 | -4,85E-02 |
| 197.665.976.562.500 |         | -0.00023600 | -0.00023600 | -0.00023600 | -0.00023600 | -1,03E-01   | -2,02E-03 | 19767  | -0.00015600     | -0.00015600 | -0.00015600 | -0.00015600 | -2,81E-01 | -1,74E-02 |
| 197.705.566.406.250 |         | -0.00027700 | -0.00027700 | -0.00027700 | -0.00027700 | -8,33E-02   | -2,58E-03 | 19771  | -0.00022900     | -0.00022900 | -0.00022900 | -0.00022900 | -3,56E-01 | 1,48E-02  |
| 197.746.230.468.750 |         | -0.00030300 | -0.00030300 | -0.00030300 | -0.00030300 | -1,23E-01   | -1,50E-03 | 19775  | -0.00044200     | -0.00044200 | -0.00044200 | -0.00044200 | -1,62E-01 | 4,54E-02  |
| 197.785.859.375.000 |         | -0.00037600 | -0.00037600 | -0.00037600 | -0.00037600 | -9,53E-02   | 6,59E-03  | 19779  | -0.00035900     | -0.00035900 | -0.00035900 | -0.00035900 | 8,64E-03  | -2,90E-02 |
| 197.825.507.812.500 |         | -0.00037900 | -0.00037900 | -0.00037900 | -0.00037900 | -7,11E-02   | -1,01E-03 | 19783  | -0.00043500     | -0.00043500 | -0.00043500 | -0.00043500 | -3,92E-01 | -2,07E-02 |
| 197.866.210.937.500 |         | -0.00043300 | -0.00043300 | -0.00043300 | -0.00043300 | -1,03E-01   | -1,06E-02 | 19787  | -0.00067400     | -0.00067400 | -0.00067400 | -0.00067400 | -1,58E-01 | 2,25E-02  |
| 197.905.898.437.500 |         | -0.00046200 | -0.00046200 | -0.00046200 | -0.00046200 | -1,57E-01   | -1,30E-03 | 19791  | -0.00056200     | -0.00056200 | -0.00056200 | -0.00056200 | -2,11E-01 | -1,01E-02 |
| 197.945.585.937.500 |         | -0.00055800 | -0.00055800 | -0.00055800 | -0.00055800 | -1,14E-01   | 6,35E-03  | 19795  | -0.00084200     | -0.00084200 | -0.00084200 | -0.00084200 | -2,38E-01 | 2,38E-02  |
| 197.986.347.656.250 |         | -0.00055300 | -0.00055300 | -0.00055300 | -0.00055300 | -1,06E-01   | -9,15E-04 | 19799  | -0.00075300     | -0.00075300 | -0.00075300 | -0.00075300 | -1,97E-02 | -1,14E-02 |
| 198.026.074.218.750 |         | -0.00064300 | -0.00064300 | -0.00064300 | -0.00064300 | -1,21E-01   | 1,57E-03  | 19803  | -0.00085800     | -0.00085800 | -0.00085800 | -0.00085800 | -3,30E-01 | -2,26E-02 |
| 198.065.820.312.500 |         | -0.00065000 | -0.00065000 | -0.00065000 | -0.00065000 | -9,31E-02   | 6,51E-03  | 19807  | -0.00102000     | -0.00102000 | -0.00102000 | -0.00102000 | -1,99E-01 | 3,89E-02  |
| 198.105.585.937.500 |         | -0.00071700 | -0.00071700 | -0.00071700 | -0.00071700 | -6,94E-02   | -7,60E-04 | 19811  | -0.00102000     | -0.00102000 | -0.00102000 | -0.00102000 | -2,13E-02 | 2,07E-02  |
| 198.146.406.250.000 |         | -0.00070500 | -0.00070500 | -0.00070500 | -0.00070500 | -9,93E-02   | -8,67E-03 | 19815  | -0.00103000     | -0.00103000 | -0.00103000 | -0.00103000 | -3,25E-02 | -1,47E-02 |
| 198.186.210.937.500 |         | -0.00079700 | -0.00079700 | -0.00079700 | -0.00079700 | -1,39E-01   | -2,24E-03 | 19819  | -0.00104000     | -0.00104000 | -0.00104000 | -0.00104000 | -1,40E-01 | -8,49E-03 |
| 198.226.015.625.000 |         | -0.00081600 | -0.00081600 | -0.00081600 | -0.00081600 | -1,17E-01   | 9,18E-03  | 19823  | -0.00114000     | -0.00114000 | -0.00114000 | -0.00114000 | -1,00E-01 | 4,07E-03  |

|                     |             |             |             |             |            |           |       |             |             |             |             |            |           |
|---------------------|-------------|-------------|-------------|-------------|------------|-----------|-------|-------------|-------------|-------------|-------------|------------|-----------|
| 198.265.839.843.750 | -0.00089000 | -0.00089000 | -0.00089000 | -0.00089000 | -6,62E-02  | 4,41E-03  | 19827 | -0.0011200  | -0.0011200  | -0.0011200  | -0.0011200  | -1,07E-01  | -3,71E-04 |
| 198.305.683.593.750 | -0.00086900 | -0.00086900 | -0.00086900 | -0.00086900 | -8,20E-02  | -5,99E-03 | 19831 | -0.0012300  | -0.0012300  | -0.0012300  | -0.0012300  | -1,03E-01  | 1,21E-02  |
| 198.345.546.875.000 | -0.00095500 | -0.00095500 | -0.00095500 | -0.00095500 | -1,14E-01  | 4,05E-03  | 19835 | -0.0012000  | -0.0012000  | -0.0012000  | -0.0012000  | -1,04E-02  | 2,01E-02  |
| 198.386.464.843.750 | -0.00096100 | -0.00096100 | -0.00096100 | -0.00096100 | -4,93E-02  | 1,16E-02  | 19839 | -0.0012400  | -0.0012400  | -0.0012400  | -0.0012400  | 5,92E-02   | 4,25E-04  |
| 198.426.367.187.500 | -0.00099500 | -0.00099500 | -0.00099500 | -0.00099500 | -2,00E-02  | -2,72E-03 | 19843 | -0.0011600  | -0.0011600  | -0.0011600  | -0.0011600  | -6,96E-03  | -3,96E-02 |
| 198.466.269.531.250 | -0.00097700 | -0.00097700 | -0.00097700 | -0.00097700 | -7,10E-02  | -5,97E-03 | 19847 | -0.0012400  | -0.0012400  | -0.0012400  | -0.0012400  | -2,57E-01  | -9,21E-03 |
| 198.506.191.406.250 | -0.0010500  | -0.0010500  | -0.0010500  | -0.0010500  | -6,76E-02  | 3,65E-03  | 19851 | -0.0013600  | -0.0013600  | -0.0013600  | -0.0013600  | -8,04E-02  | 5,14E-02  |
| 198.546.132.812.500 | -0.0010300  | -0.0010300  | -0.0010300  | -0.0010300  | -4,18E-02  | 1,02E-03  | 19855 | -0.0013100  | -0.0013100  | -0.0013100  | -0.0013100  | 1,54E-01   | 1,65E-02  |
| 198.586.093.750.000 | -0.0010900  | -0.0010900  | -0.0010900  | -0.0010900  | -5,95E-02  | 9,75E-03  | 19859 | -0.0012400  | -0.0012400  | -0.0012400  | -0.0012400  | 5,12E-02   | -1,98E-02 |
| 198.626.074.218.750 | -0.0010800  | -0.0010800  | -0.0010800  | -0.0010800  | 3,61E-02   | 1,16E-02  | 19863 | -0.0012700  | -0.0012700  | -0.0012700  | -0.0012700  | -5,09E-03  | -1,05E-02 |
| 198.666.054.687.500 | -0.0010600  | -0.0010600  | -0.0010600  | -0.0010600  | 3,34E-02   | 4,67E-03  | 19867 | -0.0012400  | -0.0012400  | -0.0012400  | -0.0012400  | -3,27E-02  | 2,14E-02  |
| 198.706.074.218.750 | -0.0010500  | -0.0010500  | -0.0010500  | -0.0010500  | 7,35E-02   | 1,28E-02  | 19871 | -0.0012900  | -0.0012900  | -0.0012900  | -0.0012900  | 1,66E-01   | 5,56E-02  |
| 198.746.093.750.000 | -0.00099800 | -0.00099800 | -0.00099800 | -0.00099800 | 1,36E-01   | 7,96E-04  | 19875 | -0.0011100  | -0.0011100  | -0.0011100  | -0.0011100  | 4,12E-01   | -4,80E-03 |
| 198.786.132.812.500 | -0.00094300 | -0.00094300 | -0.00094300 | -0.00094300 | 7,99E-02   | -3,88E-03 | 19879 | -0.00096300 | -0.00096300 | -0.00096300 | -0.00096300 | 1,28E-01   | -5,55E-02 |
| 198.826.191.406.250 | -0.00093400 | -0.00093400 | -0.00093400 | -0.00093400 | 1,05E-01   | 1,78E-02  | 19883 | -0.0010100  | -0.0010100  | -0.0010100  | -0.0010100  | -3,26E-02  | 1,35E-02  |
| 198.866.250.000.000 | -0.00085900 | -0.00085900 | -0.00085900 | -0.00085900 | 2,22E-01   | 1,68E-02  | 19887 | -0.00098900 | -0.00098900 | -0.00098900 | -0.00098900 | 2,36E-01   | 5,57E-02  |
| 198.906.347.656.250 | -0.00075500 | -0.00075500 | -0.00075500 | -0.00075500 | 2,39E-01   | 1,07E-03  | 19891 | -0.00081900 | -0.00081900 | -0.00081900 | -0.00081900 | 4,14E-01   | -4,77E-03 |
| 198.946.445.312.500 | -0.00066700 | -0.00066700 | -0.00066700 | -0.00066700 | 2,31E-01   | 1,38E-03  | 19895 | -0.00065700 | -0.00065700 | -0.00065700 | -0.00065700 | 1,98E-01   | -1,96E-02 |
| 198.985.507.812.500 | -0.00057300 | -0.00057300 | -0.00057300 | -0.00057300 | 2,50E-01   | 1,17E-02  | 19899 | -0.00066200 | -0.00066200 | -0.00066200 | -0.00066200 | 2,59E-01   | 3,78E-02  |
| 199.025.664.062.500 | -0.00046900 | -0.00046900 | -0.00046900 | -0.00046900 | 3,24E-01   | 1,51E-02  | 19903 | -0.00045200 | -0.00045200 | -0.00045200 | -0.00045200 | 4,97E-01   | 2,62E-02  |
| 199.065.800.781.250 | -0.00031300 | -0.00031300 | -0.00031300 | -0.00031300 | 3,71E-01   | 7,57E-03  | 19907 | -0.00026300 | -0.00026300 | -0.00026300 | -0.00026300 | 4,69E-01   | -1,18E-02 |
| 199.105.976.562.500 | -0.00017100 | -0.00017100 | -0.00017100 | -0.00017100 | 3,85E-01   | 1,49E-02  | 19911 | -7,51E-01   | -7,51E-01   | -7,51E-01   | -7,51E-01   | 4,02E-01   | 3,25E-02  |
| 199.146.171.875.000 | -3,59E-02   | -3,59E-02   | -3,59E-02   | -3,59E-02   | 4,91E-01   | 2,56E-02  | 19915 | 6,02E-01    | 6,02E-01    | 6,02E-01    | 6,02E-01    | 7,30E-01   | 4,91E-02  |
| 199.186.367.187.500 | 0.00022400  | 0.00022400  | 0.00022400  | 0.00022400  | 5,90E-01   | 2,40E-02  | 19919 | 0.00051200  | 0.00051200  | 0.00051200  | 0.00051200  | 7,97E-01   | -1,70E-02 |
| 199.225.527.343.750 | 0.00046500  | 0.00046500  | 0.00046500  | 0.00046500  | 6,82E-01   | 2,62E-02  | 19923 | 0.00069200  | 0.00069200  | 0.00069200  | 0.00069200  | 5,95E-01   | 5,72E-03  |
| 199.265.761.718.750 | 0.00076500  | 0.00076500  | 0.00076500  | 0.00076500  | 7,98E-01   | 3,05E-02  | 19927 | 0.00098500  | 0.00098500  | 0.00098500  | 0.00098500  | 8,42E-01   | 4,74E-02  |
| 199.306.015.625.000 | 0.0011100   | 0.0011100   | 0.0011100   | 0.0011100   | 9,27E-01   | 4,17E-02  | 19931 | 0.0013700   | 0.0013700   | 0.0013700   | 0.0013700   | 9,77E-01   | 2,85E-02  |
| 199.346.289.062.500 | 0.0015100   | 0.0015100   | 0.0015100   | 0.0015100   | 0.00011300 | 4,89E-02  | 19935 | 0.0017700   | 0.0017700   | 0.0017700   | 0.0017700   | 0.00010700 | 5,46E-02  |
| 199.385.507.812.500 | 0.0020100   | 0.0020100   | 0.0020100   | 0.0020100   | 0.00013200 | 4,58E-02  | 19939 | 0.0022200   | 0.0022200   | 0.0022200   | 0.0022200   | 0.00014100 | 9,09E-02  |
| 199.425.800.781.250 | 0.0025600   | 0.0025600   | 0.0025600   | 0.0025600   | 0.00015000 | 7,24E-02  | 19943 | 0.0028900   | 0.0028900   | 0.0028900   | 0.0028900   | 0.00017900 | 5,80E-02  |
| 199.466.132.812.500 | 0.0032200   | 0.0032200   | 0.0032200   | 0.0032200   | 0.00019000 | 9,03E-02  | 19947 | 0.0036700   | 0.0036700   | 0.0036700   | 0.0036700   | 0.00018800 | 4,24E-02  |
| 199.506.464.843.750 | 0.0040900   | 0.0040900   | 0.0040900   | 0.0040900   | 0.00022300 | 9,02E-02  | 19951 | 0.0044100   | 0.0044100   | 0.0044100   | 0.0044100   | 0.00021400 | 8,34E-02  |
| 199.545.742.187.500 | 0.0049900   | 0.0049900   | 0.0049900   | 0.0049900   | 0.00026200 | 1,30E-01  | 19955 | 0.0053700   | 0.0053700   | 0.0053700   | 0.0053700   | 0.00025400 | 1,18E-01  |
| 199.586.113.281.250 | 0.0061800   | 0.0061800   | 0.0061800   | 0.0061800   | 0.00032600 | 1,85E-01  | 19959 | 0.0064300   | 0.0064300   | 0.0064300   | 0.0064300   | 0.00030700 | 1,70E-01  |
| 199.626.503.906.250 | 0.0076200   | 0.0076200   | 0.0076200   | 0.0076200   | 0.00041100 | 2,47E-01  | 19963 | 0.0078500   | 0.0078500   | 0.0078500   | 0.0078500   | 0.00039100 | 2,07E-01  |

|                     |           |           |           |           |            |            |       |           |           |           |           |            |            |
|---------------------|-----------|-----------|-----------|-----------|------------|------------|-------|-----------|-----------|-----------|-----------|------------|------------|
| 199.665.839.843.750 | 0.0094600 | 0.0094600 | 0.0094600 | 0.0094600 | 0.00052300 | 3,29E-01   | 19967 | 0.0095500 | 0.0095500 | 0.0095500 | 0.0095500 | 0.00047200 | 2,44E-01   |
| 199.706.250.000.000 | 0.011800  | 0.011800  | 0.011800  | 0.011800  | 0.00067400 | 4,96E-01   | 19971 | 0.011600  | 0.011600  | 0.011600  | 0.011600  | 0.00058600 | 3,68E-01   |
| 199.745.625.000.000 | 0.014800  | 0.014800  | 0.014800  | 0.014800  | 0.00091800 | 7,81E-01   | 19975 | 0.014200  | 0.014200  | 0.014200  | 0.014200  | 0.00076600 | 5,68E-01   |
| 199.786.074.218.750 | 0.019100  | 0.019100  | 0.019100  | 0.019100  | 0.0013000  | 0.00013700 | 19979 | 0.017700  | 0.017700  | 0.017700  | 0.017700  | 0.0010400  | 9,83E-01   |
| 199.825.468.750.000 | 0.025200  | 0.025200  | 0.025200  | 0.025200  | 0.0020100  | 0.00028200 | 19983 | 0.022500  | 0.022500  | 0.022500  | 0.022500  | 0.0015500  | 0.00017900 |
| 199.865.957.031.250 | 0.035200  | 0.035200  | 0.035200  | 0.035200  | 0.0035500  | 0.00033700 | 19987 | 0.030100  | 0.030100  | 0.030100  | 0.030100  | 0.0024700  | 0.00019400 |
| 199.906.445.312.500 | 0.053900  | 0.053900  | 0.053900  | 0.053900  | 0.0047400  | 0.00087800 | 19991 | 0.042500  | 0.042500  | 0.042500  | 0.042500  | 0.0031200  | 0.00048300 |
| 199.908.574.218.750 | 0.055400  | 0.055400  | 0.055400  | 0.055400  | 0.0072900  | 0.0054400  | 19991 | 0.043400  | 0.043400  | 0.043400  | 0.043400  | 0.0045300  | 0.0027800  |
| 199.911.777.343.750 | 0.057800  | 0.057800  | 0.057800  | 0.057800  | 0.0076400  | 0.0012300  | 19991 | 0.044900  | 0.044900  | 0.044900  | 0.044900  | 0.0046000  | 0.00033600 |
| 199.914.980.468.750 | 0.060300  | 0.060300  | 0.060300  | 0.060300  | 0.0080800  | 0.0019200  | 19991 | 0.046400  | 0.046400  | 0.046400  | 0.046400  | 0.0047400  | 0.00069300 |
| 199.918.164.062.500 | 0.063000  | 0.063000  | 0.063000  | 0.063000  | 0.0088700  | 0.0025400  | 19992 | 0.048000  | 0.048000  | 0.048000  | 0.048000  | 0.0050500  | 0.00086700 |
| 199.921.367.187.500 | 0.066000  | 0.066000  | 0.066000  | 0.066000  | 0.0097000  | 0.0032800  | 19992 | 0.049600  | 0.049600  | 0.049600  | 0.049600  | 0.0052900  | 0.0014000  |
| 199.923.496.093.750 | 0.068100  | 0.068100  | 0.068100  | 0.068100  | 0.010600   | 0.0033100  | 19992 | 0.050800  | 0.050800  | 0.050800  | 0.050800  | 0.0057900  | 0.0020800  |
| 199.926.699.218.750 | 0.071600  | 0.071600  | 0.071600  | 0.071600  | 0.011500   | 0.0030900  | 19993 | 0.052700  | 0.052700  | 0.052700  | 0.052700  | 0.0064000  | 0.0017000  |
| 199.929.902.343.750 | 0.075500  | 0.075500  | 0.075500  | 0.075500  | 0.012600   | 0.0035600  | 19993 | 0.054900  | 0.054900  | 0.054900  | 0.054900  | 0.0068800  | 0.00080700 |
| 199.933.105.468.750 | 0.079700  | 0.079700  | 0.079700  | 0.079700  | 0.013700   | 0.0042300  | 19993 | 0.057100  | 0.057100  | 0.057100  | 0.057100  | 0.0069200  | 0.00059000 |
| 199.936.289.062.500 | 0.084200  | 0.084200  | 0.084200  | 0.084200  | 0.015300   | 0.0052300  | 19994 | 0.059300  | 0.059300  | 0.059300  | 0.059300  | 0.0072600  | 0.0021100  |
| 199.939.492.187.500 | 0.089500  | 0.089500  | 0.089500  | 0.089500  | 0.017100   | 0.0069500  | 19994 | 0.061700  | 0.061700  | 0.061700  | 0.061700  | 0.0082700  | 0.0036300  |
| 199.941.621.093.750 | 0.093400  | 0.093400  | 0.093400  | 0.093400  | 0.019000   | 0.0068000  | 19994 | 0.063700  | 0.063700  | 0.063700  | 0.063700  | 0.0092000  | 0.0029700  |
| 199.944.824.218.750 | 0.099600  | 0.099600  | 0.099600  | 0.099600  | 0.020700   | 0.0071800  | 19994 | 0.066600  | 0.066600  | 0.066600  | 0.066600  | 0.0098500  | 0.0025900  |
| 199.948.027.343.750 | 0.10663   | 0.10663   | 0.10663   | 0.10663   | 0.023600   | 0.0081300  | 19995 | 0.070000  | 0.070000  | 0.070000  | 0.070000  | 0.010900   | 0.0025300  |
| 199.951.230.468.750 | 0.11469   | 0.11469   | 0.11469   | 0.11469   | 0.025900   | 0.0065800  | 19995 | 0.073600  | 0.073600  | 0.073600  | 0.073600  | 0.011500   | 0.0024900  |
| 199.954.433.593.750 | 0.12323   | 0.12323   | 0.12323   | 0.12323   | 0.027800   | 0.0090400  | 19995 | 0.077400  | 0.077400  | 0.077400  | 0.077400  | 0.012400   | 0.0054600  |
| 199.956.562.500.000 | 0.12954   | 0.12954   | 0.12954   | 0.12954   | 0.030700   | 0.0086700  | 19996 | 0.080200  | 0.080200  | 0.080200  | 0.080200  | 0.014400   | 0.0049000  |
| 199.959.765.625.000 | 0.13962   | 0.13962   | 0.13962   | 0.13962   | 0.032400   | 0.0066100  | 19996 | 0.085000  | 0.085000  | 0.085000  | 0.085000  | 0.015100   | 0.0037800  |
| 199.962.949.218.750 | 0.15024   | 0.15024   | 0.15024   | 0.15024   | 0.035000   | 0.0085500  | 19996 | 0.089800  | 0.089800  | 0.089800  | 0.089800  | 0.016800   | 0.0071100  |
| 199.966.152.343.750 | 0.16195   | 0.16195   | 0.16195   | 0.16195   | 0.037900   | 0.0083900  | 19997 | 0.095800  | 0.095800  | 0.095800  | 0.095800  | 0.019600   | 0.0074500  |
| 199.969.355.468.750 | 0.17453   | 0.17453   | 0.17453   | 0.17453   | 0.040300   | 0.0076900  | 19997 | 0.10241   | 0.10241   | 0.10241   | 0.10241   | 0.021600   | 0.0087900  |
| 199.971.484.375.000 | 0.18345   | 0.18345   | 0.18345   | 0.18345   | 0.042000   | 0.0046200  | 19997 | 0.10727   | 0.10727   | 0.10727   | 0.10727   | 0.024300   | 0.0092000  |
| 199.974.687.500.000 | 0.19691   | 0.19691   | 0.19691   | 0.19691   | 0.042800   | 0.0038300  | 19997 | 0.11536   | 0.11536   | 0.11536   | 0.11536   | 0.026500   | 0.0084600  |
| 199.977.890.625.000 | 0.21083   | 0.21083   | 0.21083   | 0.21083   | 0.044400   | 0.0048800  | 19998 | 0.12422   | 0.12422   | 0.12422   | 0.12422   | 0.029700   | 0.010800   |
| 199.981.093.750.000 | 0.22540   | 0.22540   | 0.22540   | 0.22540   | 0.045900   | 0.0034900  | 19998 | 0.13440   | 0.13440   | 0.13440   | 0.13440   | 0.033400   | 0.010900   |
| 199.984.296.875.000 | 0.24027   | 0.24027   | 0.24027   | 0.24027   | 0.046700   | 0.0041300  | 19998 | 0.14564   | 0.14564   | 0.14564   | 0.14564   | 0.036700   | 0.011700   |
| 199.987.500.000.000 | 0.25528   | 0.25528   | 0.25528   | 0.25528   | 0.048600   | 0.0065700  | 19999 | 0.15787   | 0.15787   | 0.15787   | 0.15787   | 0.040900   | 0.017400   |
| 199.989.628.906.250 | 0.26615   | 0.26615   | 0.26615   | 0.26615   | 0.050200   | 0.00099300 | 19999 | 0.16746   | 0.16746   | 0.16746   | 0.16746   | 0.046000   | 0.013900   |

|                     |         |         |         |         |          |             |       |         |         |         |         |            |            |
|---------------------|---------|---------|---------|---------|----------|-------------|-------|---------|---------|---------|---------|------------|------------|
| 199.992.832.031.250 | 0.28208 | 0.28208 | 0.28208 | 0.28208 | 0.049100 | -0.0013400  | 19999 | 0.18242 | 0.18242 | 0.18242 | 0.18242 | 0.048400   | 0.010600   |
| 199.996.035.156.250 | 0.29762 | 0.29762 | 0.29762 | 0.29762 | 0.049300 | 0.00077200  | 20000 | 0.19847 | 0.19847 | 0.19847 | 0.19847 | 0.052800   | 0.013800   |
| 199.999.218.750.000 | 0.31355 | 0.31355 | 0.31355 | 0.31355 | 0.049600 | -0.00090400 | 20000 | 0.21607 | 0.21607 | 0.21607 | 0.21607 | 0.057200   | 0.0098700  |
| 200.002.421.875.000 | 0.32931 | 0.32931 | 0.32931 | 0.32931 | 0.048800 | -0.0028200  | 20000 | 0.23501 | 0.23501 | 0.23501 | 0.23501 | 0.059100   | 0.0059400  |
| 200.004.570.312.500 | 0.33963 | 0.33963 | 0.33963 | 0.33963 | 0.048100 | -0.00064400 | 20000 | 0.24767 | 0.24767 | 0.24767 | 0.24767 | 0.060400   | 0.0055700  |
| 200.007.773.437.500 | 0.35503 | 0.35503 | 0.35503 | 0.35503 | 0.048400 | -0.00082500 | 20001 | 0.26730 | 0.26730 | 0.26730 | 0.26730 | 0.062000   | 0.0011200  |
| 200.010.957.031.250 | 0.37056 | 0.37056 | 0.37056 | 0.37056 | 0.047600 | -0.0043400  | 20001 | 0.28731 | 0.28731 | 0.28731 | 0.28731 | 0.061100   | -0.0069000 |
| 200.014.160.156.250 | 0.38536 | 0.38536 | 0.38536 | 0.38536 | 0.045600 | -0.0033500  | 20001 | 0.30626 | 0.30626 | 0.30626 | 0.30626 | 0.057600   | -0.0081100 |
| 200.017.363.281.250 | 0.39982 | 0.39982 | 0.39982 | 0.39982 | 0.045400 | -0.0031600  | 20002 | 0.32426 | 0.32426 | 0.32426 | 0.32426 | 0.055900   | -0.011800  |
| 200.019.511.718.750 | 0.40970 | 0.40970 | 0.40970 | 0.40970 | 0.043900 | -0.0052800  | 20002 | 0.33621 | 0.33621 | 0.33621 | 0.33621 | 0.051300   | -0.018400  |
| 200.022.695.312.500 | 0.42324 | 0.42324 | 0.42324 | 0.42324 | 0.042600 | -0.0021800  | 20002 | 0.35162 | 0.35162 | 0.35162 | 0.35162 | 0.046100   | -0.017100  |
| 200.025.898.437.500 | 0.43687 | 0.43687 | 0.43687 | 0.43687 | 0.042600 | 0.00031900  | 20003 | 0.36560 | 0.36560 | 0.36560 | 0.36560 | 0.040400   | -0.016000  |
| 200.029.101.562.500 | 0.45052 | 0.45052 | 0.45052 | 0.45052 | 0.042800 | 0.00062300  | 20003 | 0.37753 | 0.37753 | 0.37753 | 0.37753 | 0.035800   | -0.014500  |
| 200.032.304.687.500 | 0.46430 | 0.46430 | 0.46430 | 0.46430 | 0.043000 | 0.00022000  | 20003 | 0.38854 | 0.38854 | 0.38854 | 0.38854 | 0.031100   | -0.014000  |
| 200.035.507.812.500 | 0.47800 | 0.47800 | 0.47800 | 0.47800 | 0.042900 | -0.00038400 | 20004 | 0.39746 | 0.39746 | 0.39746 | 0.39746 | 0.026800   | -0.015700  |
| 200.037.636.718.750 | 0.48719 | 0.48719 | 0.48719 | 0.48719 | 0.042700 | -0.0016600  | 20004 | 0.40285 | 0.40285 | 0.40285 | 0.40285 | 0.022700   | -0.015800  |
| 200.040.839.843.750 | 0.50079 | 0.50079 | 0.50079 | 0.50079 | 0.042000 | -0.0021100  | 20004 | 0.40959 | 0.40959 | 0.40959 | 0.40959 | 0.018400   | -0.012400  |
| 200.044.042.968.750 | 0.51414 | 0.51414 | 0.51414 | 0.51414 | 0.041400 | 0.00059900  | 20004 | 0.41465 | 0.41465 | 0.41465 | 0.41465 | 0.014800   | -0.011300  |
| 200.047.246.093.750 | 0.52732 | 0.52732 | 0.52732 | 0.52732 | 0.042400 | 0.0044800   | 20005 | 0.41906 | 0.41906 | 0.41906 | 0.41906 | 0.011200   | -0.0097100 |
| 200.050.449.218.750 | 0.54130 | 0.54130 | 0.54130 | 0.54130 | 0.044300 | 0.0038100   | 20005 | 0.42180 | 0.42180 | 0.42180 | 0.42180 | 0.0085700  | -0.0097500 |
| 200.052.597.656.250 | 0.55100 | 0.55100 | 0.55100 | 0.55100 | 0.044500 | 0.00073300  | 20005 | 0.42365 | 0.42365 | 0.42365 | 0.42365 | 0.0059500  | -0.0092300 |
| 200.055.800.781.250 | 0.56509 | 0.56509 | 0.56509 | 0.56509 | 0.044700 | 0.0024500   | 20006 | 0.42498 | 0.42498 | 0.42498 | 0.42498 | 0.0036300  | -0.0070700 |
| 200.059.003.906.250 | 0.57962 | 0.57962 | 0.57962 | 0.57962 | 0.046000 | 0.0030800   | 20006 | 0.42597 | 0.42597 | 0.42597 | 0.42597 | 0.0014200  | -0.0049800 |
| 200.062.207.031.250 | 0.59460 | 0.59460 | 0.59460 | 0.59460 | 0.046600 | 0.0023600   | 20006 | 0.42589 | 0.42589 | 0.42589 | 0.42589 | 0.00043400 | -4.48E-01  |
| 200.065.410.156.250 | 0.60946 | 0.60946 | 0.60946 | 0.60946 | 0.047600 | 0.0060600   | 20007 | 0.42625 | 0.42625 | 0.42625 | 0.42625 | 0.0013900  | 0.0051100  |
| 200.067.539.062.500 | 0.61995 | 0.61995 | 0.61995 | 0.61995 | 0.049900 | 0.0051800   | 20007 | 0.42663 | 0.42663 | 0.42663 | 0.42663 | 0.0031600  | 0.0053000  |
| 200.070.742.187.500 | 0.63608 | 0.63608 | 0.63608 | 0.63608 | 0.050300 | 0.0031800   | 20007 | 0.42793 | 0.42793 | 0.42793 | 0.42793 | 0.0042200  | 0.0070300  |
| 200.073.945.312.500 | 0.65220 | 0.65220 | 0.65220 | 0.65220 | 0.051900 | 0.0063100   | 20007 | 0.42933 | 0.42933 | 0.42933 | 0.42933 | 0.0076600  | 0.014200   |
| 200.077.148.437.500 | 0.66929 | 0.66929 | 0.66929 | 0.66929 | 0.054400 | 0.0065900   | 20008 | 0.43284 | 0.43284 | 0.43284 | 0.43284 | 0.013300   | 0.014600   |
| 200.080.351.562.500 | 0.68705 | 0.68705 | 0.68705 | 0.68705 | 0.056100 | 0.0046500   | 20008 | 0.43785 | 0.43785 | 0.43785 | 0.43785 | 0.017000   | 0.016500   |
| 200.082.480.468.750 | 0.69921 | 0.69921 | 0.69921 | 0.69921 | 0.056800 | 0.0016100   | 20008 | 0.44190 | 0.44190 | 0.44190 | 0.44190 | 0.022100   | 0.017000   |
| 200.085.683.593.750 | 0.71734 | 0.71734 | 0.71734 | 0.71734 | 0.057000 | 0.0034800   | 20009 | 0.44961 | 0.44961 | 0.44961 | 0.44961 | 0.026100   | 0.012100   |
| 200.088.886.718.750 | 0.73573 | 0.73573 | 0.73573 | 0.73573 | 0.059100 | 0.0067900   | 20009 | 0.45861 | 0.45861 | 0.45861 | 0.45861 | 0.029800   | 0.012400   |
| 200.092.089.843.750 | 0.75515 | 0.75515 | 0.75515 | 0.75515 | 0.061300 | 0.0043300   | 20009 | 0.46870 | 0.46870 | 0.46870 | 0.46870 | 0.034000   | 0.013300   |
| 200.095.292.968.750 | 0.77503 | 0.77503 | 0.77503 | 0.77503 | 0.061800 | 0.0030000   | 20010 | 0.48041 | 0.48041 | 0.48041 | 0.48041 | 0.038400   | 0.011800   |

|                     |         |         |         |         |            |             |       |         |            |         |            |          |             |
|---------------------|---------|---------|---------|---------|------------|-------------|-------|---------|------------|---------|------------|----------|-------------|
| 200.098.496.093.750 | 0.79478 | 0.79478 | 0.79478 | 0.79478 | 0.063200   | 0.0038700   | 20010 | 0.49329 | 0.49329    | 0.49329 | 0.49329    | 0.041500 | 0.011000    |
| 200.100.644.531.250 | 0.80887 | 10.518  | 0.80888 | 10.518  | 0.063900   | -0.0028600  | 20010 | 0.50263 | -0.70724   | 0.50264 | -0.70723   | 0.044300 | 0.0053000   |
| 200.103.847.656.250 | 0.82898 | 0.77351 | 0.82906 | 0.77359 | 0.061700   | -0.0043000  | 20010 | 0.51697 | -0.68911   | 0.51699 | -0.68908   | 0.044400 | 0.0012500   |
| 200.107.050.781.250 | 0.84837 | 0.78696 | 0.84852 | 0.78712 | 0.061200   | 4.35E-01    | 20011 | 0.53104 | -0.55342   | 0.53109 | -0.55337   | 0.045100 | 0.0057200   |
| 200.110.253.906.250 | 0.86818 | 0.80000 | 0.86841 | 0.80023 | 0.061700   | -0.00069100 | 20011 | 0.54585 | -0.42438   | 0.54592 | -0.42431   | 0.048000 | 0.0076900   |
| 200.113.457.031.250 | 0.88794 | 0.81254 | 0.88824 | 0.81284 | 0.060700   | -0.0073200  | 20011 | 0.56184 | -0.30262   | 0.56193 | -0.30253   | 0.050000 | 0.0032900   |
| 200.115.585.937.500 | 0.90055 | 0.82064 | 0.90090 | 0.82099 | 0.057800   | -0.0087600  | 20012 | 0.57250 | -0.22528   | 0.57261 | -0.22518   | 0.049800 | 0.0023300   |
| 200.118.808.593.750 | 0.91889 | 0.83252 | 0.91931 | 0.83294 | 0.056000   | -0.0082400  | 20012 | 0.58848 | -0.11385   | 0.58861 | -0.11373   | 0.051200 | 0.0042500   |
| 200.122.011.718.750 | 0.93658 | 0.84393 | 0.93707 | 0.84442 | 0.052500   | -0.012600   | 20012 | 0.60544 | -0.0091800 | 0.60559 | -0.0090200 | 0.052500 | 0.0011400   |
| 200.125.214.843.750 | 0.95257 | 0.85488 | 0.95313 | 0.85544 | 0.048000   | -0.011400   | 20013 | 0.62215 | 0.089000   | 0.62232 | 0.089200   | 0.052000 | 0.00072100  |
| 200.128.417.968.750 | 0.96728 | 0.86541 | 0.96792 | 0.86604 | 0.045300   | -0.014500   | 20013 | 0.63870 | 0.18121    | 0.63890 | 0.18140    | 0.053000 | 0.0016600   |
| 200.130.546.875.000 | 0.97670 | 0.87219 | 0.97738 | 0.87288 | 0.040300   | -0.018000   | 20013 | 0.65039 | 0.23936    | 0.65060 | 0.23957    | 0.052900 | -0.0010600  |
| 200.133.750.000.000 | 0.98875 | 0.88205 | 0.98950 | 0.88281 | 0.035700   | -0.013900   | 20013 | 0.66688 | 0.32203    | 0.66711 | 0.32226    | 0.052400 | -0.00038400 |
| 200.136.953.125.000 | 0.99956 | 0.89154 | 10.004  | 0.89237 | 0.031400   | -0.014300   | 20014 | 0.68400 | 0.39946    | 0.68425 | 0.39972    | 0.052600 | -0.00038200 |
| 200.140.175.781.250 | 10.089  | 0.90068 | 10.098  | 0.90157 | 0.026500   | -0.014600   | 20014 | 0.70071 | 0.47180    | 0.70098 | 0.47207    | 0.052200 | 0.00028000  |
| 200.143.378.906.250 | 10.166  | 0.90937 | 10.175  | 0.91034 | 0.022000   | -0.019800   | 20014 | 0.71750 | 0.53857    | 0.71780 | 0.53887    | 0.052800 | 0.00061100  |
| 200.145.507.812.500 | 10.206  | 0.91495 | 10.217  | 0.91597 | 0.015900   | -0.019700   | 20015 | 0.72884 | 0.58029    | 0.72915 | 0.58060    | 0.052500 | -0.0039900  |
| 200.148.710.937.500 | 10.250  | 0.92303 | 10.261  | 0.92412 | 0.011500   | -0.014400   | 20015 | 0.74549 | 0.63901    | 0.74582 | 0.63934    | 0.050700 | -0.0042700  |
| 200.151.914.062.500 | 10.280  | 0.93078 | 10.291  | 0.93194 | 0.0067300  | -0.014500   | 20015 | 0.76132 | 0.69329    | 0.76167 | 0.69365    | 0.049800 | -0.0022400  |
| 200.155.136.718.750 | 10.294  | 0.93819 | 10.306  | 0.93943 | 0.0021400  | -0.012700   | 20016 | 0.77749 | 0.74331    | 0.77787 | 0.74368    | 0.049200 | -0.0012400  |
| 200.158.339.843.750 | 10.294  | 0.94522 | 10.307  | 0.94653 | -0.0014300 | -0.014300   | 20016 | 0.79292 | 0.78879    | 0.79332 | 0.78919    | 0.049000 | -0.0010000  |
| 200.160.468.750.000 | 10.286  | 0.94971 | 10.300  | 0.95107 | -0.0054900 | -0.012500   | 20016 | 0.80360 | 0.81682    | 0.80401 | 0.81723    | 0.048700 | -0.0049200  |
| 200.163.671.875.000 | 10.264  | 0.95621 | 10.279  | 0.95763 | -0.0080800 | -0.0085100  | 20016 | 0.81892 | 0.85582    | 0.81935 | 0.85626    | 0.046400 | -0.0071800  |
| 200.166.875.000.000 | 10.234  | 0.96236 | 10.249  | 0.96385 | -0.010900  | -0.0085700  | 20017 | 0.83331 | 0.89100    | 0.83377 | 0.89146    | 0.044100 | -0.0071800  |
| 200.170.097.656.250 | 10.194  | 0.96823 | 10.210  | 0.96980 | -0.013600  | -0.0068200  | 20017 | 0.84722 | 0.92285    | 0.84770 | 0.92333    | 0.041700 | -0.0070300  |
| 200.173.300.781.250 | 10.147  | 0.97376 | 10.163  | 0.97540 | -0.015300  | -0.0048400  | 20017 | 0.86011 | 0.95116    | 0.86061 | 0.95166    | 0.039600 | -0.0038900  |
| 200.176.503.906.250 | 10.096  | 0.97901 | 10.113  | 0.98072 | -0.016700  | -0.0057100  | 20018 | 0.87259 | 0.97641    | 0.87311 | 0.97694    | 0.039200 | -0.0032900  |
| 200.178.632.812.500 | 10.058  | 0.98233 | 10.076  | 0.98409 | -0.018400  | -0.0036600  | 20018 | 0.88107 | 0.99152    | 0.88160 | 0.99206    | 0.037800 | -0.0080800  |
| 200.181.855.468.750 | 0.99976 | 0.98712 | 10.016  | 0.98894 | -0.018600  | -0.00012700 | 20018 | 0.89282 | 10.120     | 0.89338 | 10.126     | 0.034900 | -0.0055200  |
| 200.185.058.593.750 | 0.99383 | 0.99159 | 0.99573 | 0.99349 | -0.018400  | 0.0010300   | 20019 | 0.90349 | 10.297     | 0.90407 | 10.303     | 0.034300 | -0.0040500  |
| 200.188.261.718.750 | 0.98794 | 0.99581 | 0.98991 | 0.99778 | -0.018000  | 0.0015200   | 20019 | 0.91478 | 10.450     | 0.91538 | 10.457     | 0.032300 | -0.0083900  |
| 200.191.464.843.750 | 0.98230 | 0.99975 | 0.98434 | 10.018  | -0.017500  | 0.0034900   | 20019 | 0.92421 | 10.581     | 0.92483 | 10.587     | 0.028900 | -0.0062300  |
| 200.193.613.281.250 | 0.97859 | 10.023  | 0.98068 | 10.043  | -0.016100  | 0.0054500   | 20019 | 0.93024 | 10.656     | 0.93088 | 10.663     | 0.029000 | -0.0038000  |
| 200.196.816.406.250 | 0.97367 | 10.058  | 0.97583 | 10.079  | -0.014600  | 0.0050900   | 20020 | 0.93972 | 10.753     | 0.94038 | 10.760     | 0.026900 | -0.0048200  |
| 200.200.019.531.250 | 0.96927 | 10.091  | 0.97151 | 10.113  | -0.012900  | 0.0062600   | 20020 | 0.94743 | 10.833     | 0.94811 | 10.839     | 0.025900 | -0.00051700 |

|                     |         |        |         |        |             |             |       |         |        |         |        |           |             |
|---------------------|---------|--------|---------|--------|-------------|-------------|-------|---------|--------|---------|--------|-----------|-------------|
| 200.203.222.656.250 | 0.96543 | 10.121 | 0.96773 | 10.144 | -0.010500   | 0.0070000   | 20020 | 0.95633 | 10.897 | 0.95703 | 10.904 | 0.026500  | -0.0016200  |
| 200.206.425.781.250 | 0.96252 | 10.149 | 0.96489 | 10.173 | -0.0083700  | 0.0088800   | 20021 | 0.96443 | 10.947 | 0.96516 | 10.954 | 0.024900  | -0.0046700  |
| 200.208.574.218.750 | 0.96095 | 10.167 | 0.96337 | 10.191 | -0.0057900  | 0.0092700   | 20021 | 0.96963 | 10.973 | 0.97038 | 10.981 | 0.024000  | -0.0027800  |
| 200.211.777.343.750 | 0.95942 | 10.192 | 0.96191 | 10.217 | -0.0034100  | 0.0076700   | 20021 | 0.97729 | 11.005 | 0.97805 | 11.012 | 0.023400  | -0.0029200  |
| 200.214.980.468.750 | 0.95877 | 10.215 | 0.96133 | 10.240 | -0.00088000 | 0.0075100   | 20021 | 0.98460 | 11.028 | 0.98538 | 11.035 | 0.022200  | -0.0021400  |
| 200.218.203.125.000 | 0.95885 | 10.235 | 0.96149 | 10.262 | 0.0014200   | 0.0064400   | 20022 | 0.99154 | 11.044 | 0.99235 | 11.052 | 0.022000  | -0.00033100 |
| 200.221.406.250.000 | 0.95968 | 10.254 | 0.96239 | 10.281 | 0.0032600   | 0.0069800   | 20022 | 0.99875 | 11.055 | 0.99958 | 11.063 | 0.021900  | -0.00093400 |
| 200.223.535.156.250 | 0.96059 | 10.266 | 0.96335 | 10.293 | 0.0051400   | 0.0059600   | 20022 | 10.032  | 11.060 | 10.041  | 11.069 | 0.021500  | 0.00035100  |
| 200.226.757.812.500 | 0.96243 | 10.282 | 0.96526 | 10.310 | 0.0064500   | 0.0042900   | 20023 | 10.103  | 11.068 | 10.111  | 11.076 | 0.022100  | -0.00037900 |
| 200.229.960.937.500 | 0.96473 | 10.296 | 0.96763 | 10.325 | 0.0078900   | 0.0036200   | 20023 | 10.175  | 11.075 | 10.183  | 11.083 | 0.021300  | -0.0024700  |
| 200.233.164.062.500 | 0.96749 | 10.308 | 0.97046 | 10.338 | 0.0087700   | 0.0020700   | 20023 | 10.239  | 11.081 | 10.248  | 11.090 | 0.020600  | -0.00015000 |
| 200.236.386.718.750 | 0.97037 | 10.319 | 0.97341 | 10.350 | 0.0092200   | 0.0023000   | 20024 | 10.307  | 11.087 | 10.316  | 11.096 | 0.021200  | 0.0015800   |
| 200.238.515.625.000 | 0.97242 | 10.326 | 0.97551 | 10.357 | 0.0099900   | 0.0012600   | 20024 | 10.352  | 11.091 | 10.362  | 11.100 | 0.021400  | -0.00058100 |
| 200.241.718.750.000 | 0.97569 | 10.334 | 0.97886 | 10.366 | 0.0098900   | -0.00074500 | 20024 | 10.421  | 11.096 | 10.430  | 11.106 | 0.020900  | -0.0024200  |
| 200.244.941.406.250 | 0.97878 | 10.342 | 0.98202 | 10.374 | 0.0095200   | -0.00084600 | 20024 | 10.486  | 11.102 | 10.496  | 11.112 | 0.019800  | -0.0014400  |
| 200.248.144.531.250 | 0.98181 | 10.348 | 0.98512 | 10.381 | 0.0093500   | -0.00095200 | 20025 | 10.548  | 11.106 | 10.558  | 11.116 | 0.019900  | 0.0011800   |
| 200.251.347.656.250 | 0.98477 | 10.353 | 0.98814 | 10.387 | 0.0089100   | -0.0025200  | 20025 | 10.614  | 11.111 | 10.624  | 11.121 | 0.020600  | -0.0018800  |
| 200.253.496.093.750 | 0.98658 | 10.356 | 0.99000 | 10.390 | 0.0080000   | -0.0030900  | 20025 | 10.659  | 11.114 | 10.669  | 11.124 | 0.018900  | -0.0057600  |
| 200.256.699.218.750 | 0.98905 | 10.359 | 0.99254 | 10.394 | 0.0072500   | -0.0026100  | 20026 | 10.715  | 11.117 | 10.726  | 11.128 | 0.017500  | -0.0036300  |
| 200.259.902.343.750 | 0.99123 | 10.361 | 0.99479 | 10.397 | 0.0063300   | -0.0029200  | 20026 | 10.771  | 11.121 | 10.782  | 11.132 | 0.016600  | -0.0010300  |
| 200.263.125.000.000 | 0.99312 | 10.362 | 0.99675 | 10.399 | 0.0053800   | -0.0026700  | 20026 | 10.822  | 11.124 | 10.833  | 11.135 | 0.016900  | -0.00065900 |
| 200.266.328.125.000 | 0.99468 | 10.363 | 0.99839 | 10.400 | 0.0046100   | -0.0029500  | 20027 | 10.879  | 11.127 | 10.890  | 11.138 | 0.016200  | -0.0040100  |
| 200.268.476.562.500 | 0.99558 | 10.363 | 0.99934 | 10.401 | 0.0038000   | -0.0030500  | 20027 | 10.908  | 11.129 | 10.920  | 11.140 | 0.014700  | -0.0049800  |
| 200.271.679.687.500 | 0.99671 | 10.363 | 10.005  | 10.401 | 0.0029800   | -0.0027800  | 20027 | 10.958  | 11.131 | 10.969  | 11.143 | 0.013500  | -0.0054800  |
| 200.274.882.812.500 | 0.99749 | 10.361 | 10.014  | 10.400 | 0.0020200   | -0.0025900  | 20027 | 10.995  | 11.133 | 11.007  | 11.145 | 0.011200  | -0.0031200  |
| 200.278.105.468.750 | 0.99801 | 10.360 | 10.020  | 10.400 | 0.0013200   | -0.0017300  | 20028 | 11.030  | 11.135 | 11.042  | 11.147 | 0.011500  | -0.00038900 |
| 200.281.308.593.750 | 0.99834 | 10.358 | 10.024  | 10.398 | 0.00090500  | -0.0012000  | 20028 | 11.069  | 11.136 | 11.081  | 11.149 | 0.010900  | -0.0042000  |
| 200.284.511.718.750 | 0.99859 | 10.355 | 10.027  | 10.397 | 0.00055000  | -0.0015000  | 20028 | 11.100  | 11.137 | 11.112  | 11.150 | 0.0088100 | -0.0074900  |
| 200.286.660.156.250 | 0.99864 | 10.354 | 10.028  | 10.395 | 0.00010300  | -0.00093800 | 20029 | 11.116  | 11.138 | 11.129  | 11.151 | 0.0069400 | -0.00064800 |
| 200.289.863.281.250 | 0.99864 | 10.351 | 10.029  | 10.393 | 4,82E-01    | 5,26E-01    | 20029 | 11.137  | 11.139 | 11.150  | 11.152 | 0.0084600 | 0.0022500   |
| 200.293.085.937.500 | 0.99867 | 10.348 | 10.030  | 10.391 | 0.00013700  | 0.00036100  | 20029 | 11.170  | 11.139 | 11.183  | 11.152 | 0.0083800 | -0.0056000  |
| 200.296.289.062.500 | 0.99873 | 10.345 | 10.031  | 10.389 | 0.00028000  | 0.00041200  | 20030 | 11.191  | 11.139 | 11.204  | 11.152 | 0.0048700 | -0.0067100  |
| 200.299.492.187.500 | 0.99885 | 10.342 | 10.033  | 10.387 | 0.00040100  | 0.00098100  | 20030 | 11.202  | 11.139 | 11.215  | 11.152 | 0.0040800 | -0.00097300 |
| 200.301.640.625.000 | 0.99894 | 10.340 | 10.034  | 10.385 | 0.00080500  | 0.0015900   | 20030 | 11.213  | 11.139 | 11.226  | 11.152 | 0.0043500 | -0.00023400 |
| 200.304.843.750.000 | 0.99928 | 10.337 | 10.038  | 10.383 | 0.0012500   | 0.0015700   | 20030 | 11.225  | 11.138 | 11.239  | 11.152 | 0.0039600 | -0.0024000  |

|                     |         |        |        |        |             |             |       |        |        |        |        |             |             |
|---------------------|---------|--------|--------|--------|-------------|-------------|-------|--------|--------|--------|--------|-------------|-------------|
| 200.308.066.406.250 | 0.99975 | 10.334 | 10.044 | 10.381 | 0.0018100   | 0.0021700   | 20031 | 11.238 | 11.137 | 11.252 | 11.151 | 0.0028000   | -0.0031800  |
| 200.311.269.531.250 | 10.004  | 10.331 | 10.051 | 10.379 | 0.0026400   | 0.0022800   | 20031 | 11.243 | 11.136 | 11.257 | 11.150 | 0.0019100   | -0.0020600  |
| 200.314.492.187.500 | 10.015  | 10.329 | 10.062 | 10.376 | 0.0032800   | 0.0022400   | 20031 | 11.250 | 11.134 | 11.265 | 11.149 | 0.0014800   | -0.00039000 |
| 200.316.621.093.750 | 10.022  | 10.327 | 10.070 | 10.375 | 0.0038500   | 0.0022000   | 20032 | 11.251 | 11.133 | 11.265 | 11.148 | 0.0017100   | -0.00085700 |
| 200.319.843.750.000 | 10.035  | 10.324 | 10.084 | 10.373 | 0.0044600   | 0.0021900   | 20032 | 11.259 | 11.131 | 11.274 | 11.146 | 0.0010200   | -0.00033000 |
| 200.323.046.875.000 | 10.051  | 10.321 | 10.100 | 10.371 | 0.0052500   | 0.0021700   | 20032 | 11.257 | 11.129 | 11.272 | 11.144 | -0.00041500 | -0.0014100  |
| 200.326.250.000.000 | 10.069  | 10.318 | 10.119 | 10.369 | 0.0058500   | 0.0019400   | 20033 | 11.257 | 11.126 | 11.272 | 11.142 | 0.00011500  | 0.00048100  |
| 200.329.472.656.250 | 10.088  | 10.316 | 10.139 | 10.367 | 0.0064900   | 0.0028800   | 20033 | 11.258 | 11.124 | 11.274 | 11.139 | -0.00010600 | -0.0018300  |
| 200.331.601.562.500 | 10.103  | 10.314 | 10.155 | 10.365 | 0.0073900   | 0.0020200   | 20033 | 11.256 | 11.122 | 11.272 | 11.138 | -0.00086700 | -0.00016400 |
| 200.334.824.218.750 | 10.128  | 10.311 | 10.180 | 10.363 | 0.0075700   | 0.0012000   | 20033 | 11.253 | 11.119 | 11.269 | 11.135 | -0.00019400 | 0.0015400   |
| 200.338.027.343.750 | 10.152  | 10.308 | 10.205 | 10.361 | 0.0081600   | 0.0019000   | 20034 | 11.255 | 11.115 | 11.271 | 11.132 | 0.00012300  | -0.00030800 |
| 200.341.250.000.000 | 10.180  | 10.306 | 10.234 | 10.359 | 0.0088000   | 0.0011100   | 20034 | 11.254 | 11.112 | 11.271 | 11.128 | -0.00039200 | -8,98E-01   |
| 200.344.453.125.000 | 10.209  | 10.303 | 10.263 | 10.357 | 0.0088700   | 0.00077100  | 20034 | 11.252 | 11.108 | 11.269 | 11.125 | 6,52E-01    | 0.0016400   |
| 200.346.601.562.500 | 10.228  | 10.301 | 10.283 | 10.356 | 0.0092100   | 0.0014500   | 20035 | 11.255 | 11.105 | 11.271 | 11.122 | 0.00048700  | 0.00026000  |
| 200.349.804.687.500 | 10.258  | 10.299 | 10.314 | 10.354 | 0.0096500   | 0.0011700   | 20035 | 11.255 | 11.101 | 11.272 | 11.118 | 0.00020400  | -0.0014200  |
| 200.353.027.343.750 | 10.290  | 10.296 | 10.346 | 10.352 | 0.0099600   | 0.00085300  | 20035 | 11.256 | 11.097 | 11.273 | 11.114 | -0.00042800 | 0.00012400  |
| 200.356.230.468.750 | 10.322  | 10.293 | 10.379 | 10.351 | 0.010200    | 0.00049900  | 20036 | 11.252 | 11.092 | 11.270 | 11.110 | 0.00028400  | 0.0019600   |
| 200.359.453.125.000 | 10.355  | 10.291 | 10.413 | 10.349 | 0.010300    | 0.00030000  | 20036 | 11.258 | 11.088 | 11.275 | 11.105 | 0.00083400  | -0.00029500 |
| 200.363.730.468.750 | 10.399  | 10.288 | 10.458 | 10.346 | 0.010400    | 0.00028600  | 20036 | 11.259 | 11.081 | 11.276 | 11.099 | 6,24E-01    | -6,31E-02   |
| 200.366.953.125.000 | 10.433  | 10.285 | 10.493 | 10.344 | 0.010500    | 0.00042500  | 20037 | 11.258 | 11.076 | 11.276 | 11.094 | 0.00083000  | 0.0021400   |
| 200.371.230.468.750 | 10.478  | 10.282 | 10.538 | 10.342 | 0.010700    | 0.00060600  | 20037 | 11.265 | 11.068 | 11.283 | 11.087 | 0.0016700   | -0.00018400 |
| 200.375.507.812.500 | 10.525  | 10.278 | 10.586 | 10.340 | 0.011000    | 0.00022300  | 20038 | 11.272 | 11.061 | 11.291 | 11.080 | 0.00067200  | -0.00087500 |
| 200.379.804.687.500 | 10.572  | 10.275 | 10.634 | 10.337 | 0.010900    | 1,77E-01    | 20038 | 11.271 | 11.053 | 11.290 | 11.072 | 0.00091600  | 0.0017300   |
| 200.384.082.031.250 | 10.619  | 10.272 | 10.682 | 10.335 | 0.011000    | 0.00013300  | 20038 | 11.280 | 11.045 | 11.300 | 11.064 | 0.0021500   | 0.0022500   |
| 200.387.304.687.500 | 10.655  | 10.269 | 10.719 | 10.333 | 0.011000    | -9,89E-01   | 20039 | 11.287 | 11.038 | 11.306 | 11.058 | 0.0026100   | 0.0010700   |
| 200.391.582.031.250 | 10.702  | 10.266 | 10.767 | 10.331 | 0.011000    | -3,48E-01   | 20039 | 11.300 | 11.029 | 11.320 | 11.049 | 0.0029500   | 4,45E-01    |
| 200.396.933.593.750 | 10.760  | 10.262 | 10.826 | 10.328 | 0.011000    | -0.00031300 | 20040 | 11.315 | 11.018 | 11.335 | 11.038 | 0.0026500   | -0.00027100 |
| 200.401.230.468.750 | 10.808  | 10.259 | 10.875 | 10.326 | 0.010700    | -0.0011900  | 20040 | 11.325 | 11.009 | 11.346 | 11.029 | 0.0026900   | -2,55E-01   |
| 200.405.507.812.500 | 10.852  | 10.256 | 10.920 | 10.324 | 0.0099800   | -0.0018100  | 20041 | 11.338 | 10.999 | 11.359 | 11.020 | 0.0026300   | -0.00015500 |
| 200.409.785.156.250 | 10.893  | 10.253 | 10.962 | 10.322 | 0.0091000   | -0.0025400  | 20041 | 11.348 | 10.989 | 11.369 | 11.010 | 0.0025600   | 0.00023500  |
| 200.414.082.031.250 | 10.930  | 10.250 | 11.000 | 10.320 | 0.0078000   | -0.0028500  | 20041 | 11.360 | 10.979 | 11.381 | 11.000 | 0.0028300   | -0.00045600 |
| 200.419.433.593.750 | 10.968  | 10.246 | 11.039 | 10.318 | 0.0063500   | -0.0039400  | 20042 | 11.375 | 10.966 | 11.397 | 10.988 | 0.0021200   | -0.0010600  |
| 200.423.730.468.750 | 10.991  | 10.244 | 11.063 | 10.316 | 0.0040000   | -0.0044600  | 20042 | 11.381 | 10.955 | 11.403 | 10.977 | 0.0018100   | -0.00046400 |
| 200.429.082.031.250 | 11.007  | 10.240 | 11.080 | 10.313 | 0.0020500   | -0.0049600  | 20043 | 11.393 | 10.942 | 11.415 | 10.964 | 0.0016700   | -0.0018300  |
| 200.433.359.375.000 | 11.011  | 10.237 | 11.085 | 10.311 | -0.00078000 | -0.0059200  | 20043 | 11.397 | 10.931 | 11.419 | 10.953 | 4,97E-01    | -0.0017100  |

|                     |         |        |         |        |             |             |       |         |        |         |        |             |             |
|---------------------|---------|--------|---------|--------|-------------|-------------|-------|---------|--------|---------|--------|-------------|-------------|
| 200.438.730.468.750 | 10.999  | 10.234 | 11.075  | 10.309 | -0.0036600  | -0.0051600  | 20044 | 11.393  | 10.916 | 11.416  | 10.939 | 2,39E-01    | -0.00036900 |
| 200.444.082.031.250 | 10.971  | 10.230 | 11.048  | 10.307 | -0.0063200  | -0.0055800  | 20044 | 11.397  | 10.902 | 11.420  | 10.925 | -0.00034600 | -0.0017500  |
| 200.448.378.906.250 | 10.938  | 10.227 | 11.016  | 10.305 | -0.0090400  | -0.0053400  | 20045 | 11.390  | 10.890 | 11.413  | 10.914 | -0.0016600  | -0.0022700  |
| 200.453.730.468.750 | 10.884  | 10.224 | 10.963  | 10.302 | -0.011500   | -0.0045700  | 20045 | 11.381  | 10.875 | 11.405  | 10.899 | -0.0025300  | -0.0017700  |
| 200.459.082.031.250 | 10.816  | 10.220 | 10.895  | 10.300 | -0.013900   | -0.0039000  | 20046 | 11.363  | 10.860 | 11.387  | 10.884 | -0.0035600  | -0.0019700  |
| 200.464.453.125.000 | 10.735  | 10.217 | 10.816  | 10.298 | -0.015700   | -0.0022600  | 20046 | 11.343  | 10.845 | 11.367  | 10.869 | -0.0046400  | -0.0019300  |
| 200.469.804.687.500 | 10.648  | 10.214 | 10.730  | 10.296 | -0.016400   | -0.0013000  | 20047 | 11.313  | 10.829 | 11.338  | 10.854 | -0.0056300  | -0.00088400 |
| 200.475.175.781.250 | 10.559  | 10.211 | 10.643  | 10.294 | -0.017100   | -0.00096400 | 20048 | 11.282  | 10.814 | 11.308  | 10.839 | -0.0055900  | -5,51E-01   |
| 200.480.527.343.750 | 10.465  | 10.207 | 10.549  | 10.292 | -0.017400   | 0.00027900  | 20048 | 11.253  | 10.798 | 11.279  | 10.823 | -0.0056900  | -0.00098000 |
| 200.486.972.656.250 | 10.354  | 10.204 | 10.440  | 10.289 | -0.016700   | 0.0014200   | 20049 | 11.215  | 10.779 | 11.241  | 10.805 | -0.0067400  | -0.0019600  |
| 200.492.324.218.750 | 10.267  | 10.200 | 10.355  | 10.288 | -0.015700   | 0.0021300   | 20049 | 11.173  | 10.762 | 11.200  | 10.789 | -0.0080000  | -0.0012500  |
| 200.497.695.312.500 | 10.185  | 10.197 | 10.274  | 10.286 | -0.014400   | 0.0022900   | 20050 | 11.129  | 10.746 | 11.156  | 10.773 | -0.0080900  | -7,25E-01   |
| 200.504.121.093.750 | 10.097  | 10.194 | 10.187  | 10.283 | -0.013000   | 0.0028300   | 20050 | 11.078  | 10.727 | 11.105  | 10.754 | -0.0080900  | -0.00077900 |
| 200.509.492.187.500 | 10.032  | 10.191 | 10.123  | 10.282 | -0.011100   | 0.0030700   | 20051 | 11.034  | 10.710 | 11.062  | 10.738 | -0.0090100  | -0.00098300 |
| 200.515.917.968.750 | 0.99661 | 10.187 | 10.058  | 10.279 | -0.0093900  | 0.0029700   | 20052 | 10.972  | 10.691 | 11.000  | 10.719 | -0.0092500  | -0.00090900 |
| 200.521.289.062.500 | 0.99211 | 10.184 | 10.015  | 10.278 | -0.0076100  | 0.0029800   | 20052 | 10.925  | 10.675 | 10.953  | 10.703 | -0.010100   | -0.0013300  |
| 200.527.714.843.750 | 0.98764 | 10.181 | 0.99713 | 10.276 | -0.0058800  | 0.0026900   | 20053 | 10.853  | 10.655 | 10.882  | 10.684 | -0.010800   | -0.00027400 |
| 200.534.160.156.250 | 0.98455 | 10.177 | 0.99418 | 10.274 | -0.0041500  | 0.0028600   | 20053 | 10.786  | 10.636 | 10.815  | 10.665 | -0.010400   | 0.00046000  |
| 200.539.511.718.750 | 0.98274 | 10.174 | 0.99249 | 10.272 | -0.0025000  | 0.0025900   | 20054 | 10.730  | 10.619 | 10.759  | 10.649 | -0.010300   | -0.00016100 |
| 200.545.957.031.250 | 0.98160 | 10.171 | 0.99149 | 10.270 | -0.0010900  | 0.0022100   | 20055 | 10.665  | 10.600 | 10.695  | 10.630 | -0.010600   | -0.00069300 |
| 200.552.382.812.500 | 0.98134 | 10.168 | 0.99138 | 10.268 | 0.00034100  | 0.0021500   | 20055 | 10.593  | 10.581 | 10.624  | 10.612 | -0.011200   | -0.00043300 |
| 200.558.828.125.000 | 0.98204 | 10.165 | 0.99221 | 10.266 | 0.0016800   | 0.0019300   | 20056 | 10.521  | 10.562 | 10.552  | 10.593 | -0.011200   | 0.00020800  |
| 200.565.273.437.500 | 0.98351 | 10.161 | 0.99383 | 10.265 | 0.0028200   | 0.0015800   | 20057 | 10.449  | 10.543 | 10.480  | 10.575 | -0.010900   | 0.00083700  |
| 200.571.699.218.750 | 0.98567 | 10.158 | 0.99613 | 10.263 | 0.0037200   | 0.0011800   | 20057 | 10.381  | 10.525 | 10.412  | 10.557 | -0.010100   | 0.0012200   |
| 200.578.144.531.250 | 0.98830 | 10.155 | 0.99891 | 10.261 | 0.0043400   | 0.00079200  | 20058 | 10.319  | 10.507 | 10.351  | 10.539 | -0.0093300  | 0.00063900  |
| 200.585.664.062.500 | 0.99173 | 10.152 | 10.025  | 10.259 | 0.0048300   | 0.00051800  | 20059 | 10.250  | 10.486 | 10.283  | 10.519 | -0.0092100  | 0.00050400  |
| 200.592.089.843.750 | 0.99504 | 10.149 | 10.059  | 10.258 | 0.0050600   | -6,66E-01   | 20059 | 10.191  | 10.468 | 10.224  | 10.502 | -0.0086300  | 0.0014100   |
| 200.598.535.156.250 | 0.99824 | 10.146 | 10.093  | 10.256 | 0.0047400   | -0.00057200 | 20060 | 10.139  | 10.451 | 10.173  | 10.485 | -0.0074000  | 0.0014000   |
| 200.606.054.687.500 | 10.017  | 10.142 | 10.129  | 10.254 | 0.0042600   | -0.00092300 | 20061 | 10.087  | 10.432 | 10.121  | 10.466 | -0.0066700  | 0.0010700   |
| 200.612.500.000.000 | 10.042  | 10.139 | 10.155  | 10.253 | 0.0034600   | -0.0011000  | 20061 | 10.046  | 10.416 | 10.080  | 10.451 | -0.0059100  | 0.0013900   |
| 200.620.019.531.250 | 10.065  | 10.136 | 10.180  | 10.251 | 0.0027200   | -0.0012700  | 20062 | 10.005  | 10.398 | 10.040  | 10.433 | -0.0047300  | 0.0014700   |
| 200.626.445.312.500 | 10.080  | 10.133 | 10.196  | 10.250 | 0.0016800   | -0.0015400  | 20063 | 0.99799 | 10.383 | 10.015  | 10.418 | -0.0038500  | 0.00057800  |
| 200.633.964.843.750 | 10.088  | 10.130 | 10.207  | 10.248 | 0.00057900  | -0.0014500  | 20063 | 0.99511 | 10.365 | 0.99871 | 10.401 | -0.0039200  | 0.00050500  |
| 200.641.484.375.000 | 10.089  | 10.127 | 10.208  | 10.247 | -0.00049600 | -0.0012600  | 20064 | 0.99210 | 10.349 | 0.99574 | 10.385 | -0.0030900  | 0.0015000   |
| 200.649.003.906.250 | 10.081  | 10.123 | 10.202  | 10.245 | -0.0013200  | -0.0010700  | 20065 | 0.99046 | 10.333 | 0.99416 | 10.370 | -0.0016700  | 0.0012000   |



|                     |         |        |         |        |             |             |       |         |        |         |        |             |             |
|---------------------|---------|--------|---------|--------|-------------|-------------|-------|---------|--------|---------|--------|-------------|-------------|
| 200.655.449.218.750 | 10.070  | 10.121 | 10.193  | 10.244 | -0.0019900  | -0.00087900 | 20066 | 0.98977 | 10.320 | 0.99350 | 10.357 | -0.0014200  | 0.00079900  |
| 200.662.968.750.000 | 10.053  | 10.118 | 10.178  | 10.242 | -0.0025400  | -0.00069200 | 20066 | 0.98849 | 10.305 | 0.99227 | 10.342 | -0.00055300 | 0.0012000   |
| 200.670.488.281.250 | 10.032  | 10.115 | 10.158  | 10.241 | -0.0030300  | -0.00051500 | 20067 | 0.98893 | 10.290 | 0.99277 | 10.328 | 0.00038800  | 0.00068500  |
| 200.678.007.812.500 | 10.008  | 10.112 | 10.135  | 10.240 | -0.0033200  | -0.00025100 | 20068 | 0.98907 | 10.276 | 0.99296 | 10.315 | 0.00047800  | 0.00021100  |
| 200.686.601.562.500 | 0.99784 | 10.108 | 10.108  | 10.238 | -0.0034300  | -9.64E-01   | 20069 | 0.98971 | 10.261 | 0.99365 | 10.300 | 0.00072900  | 0.00057500  |
| 200.694.121.093.750 | 0.99523 | 10.105 | 10.084  | 10.237 | -0.0034700  | 2.63E-01    | 20069 | 0.99025 | 10.248 | 0.99424 | 10.288 | 0.0014100   | 0.0010800   |
| 200.701.640.625.000 | 0.99262 | 10.102 | 10.059  | 10.235 | -0.0033900  | 0.00025500  | 20070 | 0.99182 | 10.236 | 0.99586 | 10.276 | 0.0023500   | 0.00091000  |
| 200.709.160.156.250 | 0.99013 | 10.099 | 10.036  | 10.234 | -0.0030900  | 0.00043200  | 20071 | 0.99378 | 10.224 | 0.99787 | 10.265 | 0.0027700   | 0.00051100  |
| 200.717.773.437.500 | 0.98763 | 10.096 | 10.013  | 10.233 | -0.0027000  | 0.00064000  | 20072 | 0.99629 | 10.211 | 10.004  | 10.252 | 0.0031800   | 0.00041600  |
| 200.725.292.968.750 | 0.98578 | 10.093 | 0.99960 | 10.232 | -0.0020600  | 0.00086300  | 20073 | 0.99890 | 10.200 | 10.031  | 10.242 | 0.0034400   | 0.00015200  |
| 200.733.886.718.750 | 0.98432 | 10.090 | 0.99833 | 10.230 | -0.0013100  | 0.0011400   | 20073 | 10.018  | 10.188 | 10.061  | 10.231 | 0.0034200   | 0.00031900  |
| 200.741.406.250.000 | 0.98368 | 10.087 | 0.99785 | 10.229 | -0.00021600 | 0.0013700   | 20074 | 10.044  | 10.178 | 10.087  | 10.221 | 0.0039600   | 0.00074300  |
| 200.750.019.531.250 | 0.98397 | 10.084 | 0.99833 | 10.228 | 0.00090800  | 0.0015700   | 20075 | 10.082  | 10.167 | 10.126  | 10.211 | 0.0046200   | 0.00043200  |
| 200.757.539.062.500 | 0.98514 | 10.081 | 0.99967 | 10.227 | 0.0023100   | 0.0017300   | 20076 | 10.119  | 10.159 | 10.163  | 10.203 | 0.0046600   | -0.00060200 |
| 200.766.132.812.500 | 0.98770 | 10.078 | 10.024  | 10.225 | 0.0037000   | 0.0016200   | 20077 | 10.157  | 10.149 | 10.202  | 10.194 | 0.0036500   | -0.00076800 |
| 200.774.746.093.750 | 0.99151 | 10.075 | 10.064  | 10.224 | 0.0051100   | 0.0015400   | 20077 | 10.181  | 10.140 | 10.227  | 10.185 | 0.0033300   | -0.00035500 |
| 200.783.339.843.750 | 0.99648 | 10.072 | 10.116  | 10.223 | 0.0063500   | 0.0013200   | 20078 | 10.215  | 10.131 | 10.260  | 10.177 | 0.0030400   | -0.00057300 |
| 200.791.953.125.000 | 10.024  | 10.069 | 10.177  | 10.222 | 0.0073700   | 0.0010200   | 20079 | 10.234  | 10.123 | 10.280  | 10.169 | 0.0023500   | -0.00066900 |
| 200.800.546.875.000 | 10.092  | 10.066 | 10.246  | 10.220 | 0.0081100   | 0.00050300  | 20080 | 10.255  | 10.116 | 10.302  | 10.162 | 0.0018900   | -0.00063400 |
| 200.809.160.156.250 | 10.164  | 10.063 | 10.320  | 10.219 | 0.0082400   | -0.00010300 | 20081 | 10.266  | 10.108 | 10.314  | 10.156 | 0.0012600   | -0.00084000 |
| 200.817.773.437.500 | 10.234  | 10.060 | 10.392  | 10.218 | 0.0079400   | -0.00059200 | 20082 | 10.277  | 10.102 | 10.325  | 10.150 | 0.00043800  | -0.00086200 |
| 200.826.367.187.500 | 10.301  | 10.056 | 10.461  | 10.217 | 0.0072200   | -0.0012300  | 20083 | 10.274  | 10.096 | 10.322  | 10.144 | -0.00022600 | -0.00078100 |
| 200.834.980.468.750 | 10.358  | 10.053 | 10.520  | 10.215 | 0.0058300   | -0.0015700  | 20083 | 10.273  | 10.090 | 10.322  | 10.139 | -0.00090500 | -0.00055900 |
| 200.844.667.968.750 | 10.407  | 10.050 | 10.571  | 10.214 | 0.0043500   | -0.0019200  | 20084 | 10.257  | 10.084 | 10.307  | 10.134 | -0.0012500  | -0.00037200 |
| 200.853.281.250.000 | 10.437  | 10.047 | 10.603  | 10.213 | 0.0023100   | -0.0022300  | 20085 | 10.250  | 10.080 | 10.300  | 10.130 | -0.0015900  | -0.00050300 |
| 200.862.968.750.000 | 10.449  | 10.043 | 10.618  | 10.211 | 0.00026400  | -0.0024000  | 20086 | 10.228  | 10.075 | 10.279  | 10.126 | -0.0021700  | -0.00043000 |
| 200.871.562.500.000 | 10.442  | 10.040 | 10.612  | 10.210 | -0.0020800  | -0.0023900  | 20087 | 10.210  | 10.071 | 10.262  | 10.123 | -0.0023700  | -0.00022900 |
| 200.881.250.000.000 | 10.412  | 10.037 | 10.584  | 10.209 | -0.0041100  | -0.0021900  | 20088 | 10.185  | 10.067 | 10.237  | 10.119 | -0.0025900  | -0.00026100 |
| 200.889.863.281.250 | 10.367  | 10.033 | 10.541  | 10.208 | -0.0060800  | -0.0018500  | 20089 | 10.163  | 10.064 | 10.216  | 10.117 | -0.0028500  | -0.00018600 |
| 200.899.570.312.500 | 10.300  | 10.030 | 10.476  | 10.206 | -0.0075000  | -0.0012900  | 20090 | 10.133  | 10.061 | 10.186  | 10.115 | -0.0029300  | -6.20E-01   |
| 200.909.257.812.500 | 10.222  | 10.026 | 10.400  | 10.205 | -0.0085700  | -0.00077700 | 20091 | 10.106  | 10.059 | 10.160  | 10.113 | -0.0029700  | -9.86E-01   |
| 200.918.945.312.500 | 10.134  | 10.023 | 10.314  | 10.203 | -0.0090100  | -0.00011700 | 20092 | 10.075  | 10.057 | 10.130  | 10.111 | -0.0031200  | -8.95E-01   |
| 200.927.558.593.750 | 10.057  | 10.019 | 10.239  | 10.202 | -0.0087900  | 0.00055700  | 20093 | 10.049  | 10.055 | 10.104  | 10.110 | -0.0031300  | -8.90E-02   |
| 200.937.246.093.750 | 0.99732 | 10.016 | 10.158  | 10.200 | -0.0079900  | 0.0011000   | 20094 | 10.018  | 10.054 | 10.073  | 10.110 | -0.0031400  | 3.97E-01    |
| 200.946.953.125.000 | 0.99019 | 10.012 | 10.088  | 10.199 | -0.0066500  | 0.0013600   | 20095 | 0.99882 | 10.053 | 10.045  | 10.109 | -0.0030600  | 0.00010300  |

|                     |         |         |         |        |             |             |       |         |        |         |        |             |             |
|---------------------|---------|---------|---------|--------|-------------|-------------|-------|---------|--------|---------|--------|-------------|-------------|
| 200.957.714.843.750 | 0.98371 | 10.008  | 10.026  | 10.197 | -0.0052100  | 0.0015300   | 20096 | 0.99550 | 10.052 | 10.012  | 10.109 | -0.0029300  | 0.00031100  |
| 200.967.421.875.000 | 0.97952 | 10.004  | 0.99861 | 10.195 | -0.0035200  | 0.0016800   | 20097 | 0.99283 | 10.052 | 0.99861 | 10.110 | -0.0024200  | 0.00048600  |
| 200.977.109.375.000 | 0.97689 | 10.001  | 0.99618 | 10.193 | -0.0019600  | 0.0015200   | 20098 | 0.99081 | 10.052 | 0.99665 | 10.111 | -0.0019800  | 0.00062000  |
| 200.986.816.406.250 | 0.97572 | 0.99968 | 0.99522 | 10.192 | -0.00056200 | 0.0013000   | 20099 | 0.98899 | 10.053 | 0.99489 | 10.112 | -0.0012200  | 0.00047900  |
| 200.996.503.906.250 | 0.97580 | 0.99930 | 0.99551 | 10.190 | 0.00056300  | 0.00087600  | 20100 | 0.98845 | 10.053 | 0.99441 | 10.113 | -0.0010500  | 4,64E-01    |
| 201.007.285.156.250 | 0.97687 | 0.99888 | 0.99682 | 10.188 | 0.0012300   | 0.00053500  | 20101 | 0.98683 | 10.054 | 0.99287 | 10.115 | -0.0011200  | 0.00032500  |
| 201.016.992.187.500 | 0.97833 | 0.99849 | 0.99848 | 10.186 | 0.0016600   | 0.00025300  | 20102 | 0.98615 | 10.055 | 0.99224 | 10.116 | -0.00038800 | 0.00049900  |
| 201.027.773.437.500 | 0.98027 | 0.99807 | 10.007  | 10.185 | 0.0017500   | -3,50E-01   | 20103 | 0.98604 | 10.057 | 0.99220 | 10.119 | -1,00E+00   | 0.00019200  |
| 201.037.480.468.750 | 0.98191 | 0.99768 | 10.025  | 10.183 | 0.0015900   | -0.00022800 | 20104 | 0.98594 | 10.059 | 0.99217 | 10.121 | 6,24E-02    | 0.00029700  |
| 201.048.261.718.750 | 0.98352 | 0.99725 | 10.043  | 10.181 | 0.0012800   | -0.00027300 | 20105 | 0.98605 | 10.061 | 0.99235 | 10.124 | 0.00050900  | 0.00039000  |
| 201.059.042.968.750 | 0.98468 | 0.99682 | 10.057  | 10.179 | 0.00099700  | -0.00023100 | 20106 | 0.98704 | 10.063 | 0.99341 | 10.127 | 0.00084800  | 0.00023900  |
| 201.068.750.000.000 | 0.98556 | 0.99643 | 10.068  | 10.177 | 0.00081100  | -0.00017600 | 20107 | 0.98779 | 10.065 | 0.99422 | 10.130 | 0.00099800  | 0.00029800  |
| 201.079.531.250.000 | 0.98634 | 0.99599 | 10.078  | 10.175 | 0.00063600  | -0.00014100 | 20108 | 0.98908 | 10.068 | 0.99559 | 10.133 | 0.0014600   | 0.00029500  |
| 201.090.332.031.250 | 0.98694 | 0.99555 | 10.087  | 10.173 | 0.00050600  | -7,85E-01   | 20109 | 0.99094 | 10.071 | 0.99751 | 10.136 | 0.0016400   | 3,17E-01    |
| 201.101.113.281.250 | 0.98743 | 0.99512 | 10.094  | 10.171 | 0.00046700  | 7,73E-02    | 20110 | 0.99262 | 10.073 | 0.99925 | 10.140 | 0.0015300   | -1,24E-01   |
| 201.111.894.531.250 | 0.98794 | 0.99468 | 10.101  | 10.169 | 0.00052200  | 6,75E-01    | 20111 | 0.99423 | 10.076 | 10.009  | 10.144 | 0.0016100   | 0.00015400  |
| 201.122.695.312.500 | 0.98856 | 0.99423 | 10.110  | 10.167 | 0.00061200  | 0.00014200  | 20112 | 0.99609 | 10.079 | 10.029  | 10.147 | 0.0018600   | 0.00035600  |
| 201.133.476.562.500 | 0.98926 | 0.99379 | 10.119  | 10.164 | 0.00082900  | 0.00025100  | 20113 | 0.99824 | 10.082 | 10.051  | 10.151 | 0.0023800   | 0.00023700  |
| 201.145.351.562.500 | 0.99044 | 0.99330 | 10.134  | 10.162 | 0.0011800   | 0.00033800  | 20115 | 10.015  | 10.086 | 10.084  | 10.155 | 0.0024000   | -0.00016600 |
| 201.156.152.343.750 | 0.99194 | 0.99285 | 10.151  | 10.160 | 0.0016000   | 0.00042900  | 20116 | 10.037  | 10.089 | 10.107  | 10.159 | 0.0020000   | 0.00019200  |
| 201.166.953.125.000 | 0.99388 | 0.99240 | 10.173  | 10.158 | 0.0021100   | 0.00050000  | 20117 | 10.058  | 10.092 | 10.129  | 10.162 | 0.0028100   | 0.00047300  |
| 201.177.734.375.000 | 0.99649 | 0.99196 | 10.201  | 10.156 | 0.0026700   | 0.00045900  | 20118 | 10.097  | 10.095 | 10.169  | 10.166 | 0.0030200   | -8,47E-01   |
| 201.189.628.906.250 | 0.99994 | 0.99146 | 10.238  | 10.153 | 0.0031500   | 0.00038800  | 20119 | 10.126  | 10.098 | 10.199  | 10.170 | 0.0026200   | -0.00024700 |
| 201.200.429.687.500 | 10.036  | 0.99101 | 10.277  | 10.151 | 0.0035500   | 0.00023800  | 20120 | 10.157  | 10.100 | 10.230  | 10.173 | 0.0024600   | -7,63E-01   |
| 201.212.304.687.500 | 10.080  | 0.99051 | 10.324  | 10.149 | 0.0036900   | 1,66E-01    | 20121 | 10.182  | 10.103 | 10.256  | 10.177 | 0.0024500   | 2,57E-01    |
| 201.224.179.687.500 | 10.124  | 0.99001 | 10.370  | 10.146 | 0.0035900   | -0.00023400 | 20122 | 10.215  | 10.106 | 10.289  | 10.180 | 0.0025200   | -0.00010200 |
| 201.234.980.468.750 | 10.162  | 0.98956 | 10.410  | 10.144 | 0.0031600   | -0.00049000 | 20123 | 10.239  | 10.108 | 10.314  | 10.183 | 0.0022200   | -0.00019800 |
| 201.246.875.000.000 | 10.196  | 0.98905 | 10.446  | 10.141 | 0.0024800   | -0.00065200 | 20125 | 10.265  | 10.110 | 10.341  | 10.185 | 0.0020700   | -0.00021000 |
| 201.258.750.000.000 | 10.221  | 0.98855 | 10.474  | 10.139 | 0.0016100   | -0.00082500 | 20126 | 10.289  | 10.112 | 10.365  | 10.188 | 0.0017200   | -0.00014000 |
| 201.270.644.531.250 | 10.234  | 0.98805 | 10.490  | 10.136 | 0.00052100  | -0.00094200 | 20127 | 10.306  | 10.113 | 10.383  | 10.190 | 0.0017400   | 1,82E-01    |
| 201.282.539.062.500 | 10.233  | 0.98755 | 10.491  | 10.134 | -0.00063500 | -0.00096300 | 20128 | 10.330  | 10.115 | 10.408  | 10.192 | 0.0017600   | -0.00018900 |
| 201.294.433.593.750 | 10.219  | 0.98704 | 10.480  | 10.131 | -0.0017700  | -0.00088900 | 20129 | 10.348  | 10.116 | 10.427  | 10.194 | 0.0012900   | -0.00034100 |
| 201.306.308.593.750 | 10.191  | 0.98654 | 10.454  | 10.129 | -0.0027500  | -0.00072200 | 20131 | 10.361  | 10.117 | 10.440  | 10.196 | 0.00095100  | -0.00011700 |
| 201.318.203.125.000 | 10.153  | 0.98603 | 10.419  | 10.126 | -0.0034900  | -0.00051900 | 20132 | 10.371  | 10.117 | 10.451  | 10.197 | 0.0010100   | -7,76E-01   |
| 201.330.097.656.250 | 10.108  | 0.98553 | 10.377  | 10.124 | -0.0039800  | -0.00034200 | 20133 | 10.385  | 10.118 | 10.466  | 10.199 | 0.00076700  | -0.00039200 |

|                     |         |         |         |        |             |             |       |         |        |         |        |             |             |
|---------------------|---------|---------|---------|--------|-------------|-------------|-------|---------|--------|---------|--------|-------------|-------------|
| 201.341.992.187.500 | 10.059  | 0.98502 | 10.330  | 10.121 | -0.0043000  | -0.00025000 | 20134 | 10.389  | 10.118 | 10.471  | 10.200 | 7,84E-01    | -0.00031200 |
| 201.354.980.468.750 | 10.001  | 0.98447 | 10.275  | 10.119 | -0.0046100  | -0.00024300 | 20135 | 10.387  | 10.118 | 10.469  | 10.200 | -9,15E-02   | 0.00011000  |
| 201.366.875.000.000 | 0.99440 | 0.98396 | 10.220  | 10.116 | -0.0049000  | -0.00023400 | 20137 | 10.389  | 10.118 | 10.472  | 10.201 | 0.00035200  | 4,69E-01    |
| 201.379.863.281.250 | 0.98789 | 0.98341 | 10.158  | 10.113 | -0.0051900  | -0.00016200 | 20138 | 10.396  | 10.117 | 10.480  | 10.201 | 0.00010800  | -0.00032900 |
| 201.391.757.812.500 | 0.98149 | 0.98291 | 10.097  | 10.111 | -0.0053100  | -4,94E-02   | 20139 | 10.391  | 10.117 | 10.476  | 10.201 | -0.00046700 | -0.00041500 |
| 201.404.746.093.750 | 0.97468 | 0.98235 | 10.031  | 10.108 | -0.0052000  | 0.00018900  | 20140 | 10.384  | 10.116 | 10.470  | 10.201 | -0.00092500 | -0.00026000 |
| 201.416.660.156.250 | 0.96855 | 0.98185 | 0.99725 | 10.106 | -0.0048400  | 0.00042900  | 20142 | 10.368  | 10.115 | 10.455  | 10.201 | -0.0011200  | -0.00013000 |
| 201.429.648.437.500 | 0.96264 | 0.98130 | 0.99162 | 10.103 | -0.0041300  | 0.00059400  | 20143 | 10.356  | 10.113 | 10.443  | 10.201 | -0.0012500  | -0.00013500 |
| 201.442.636.718.750 | 0.95782 | 0.98075 | 0.98707 | 10.100 | -0.0032900  | 0.00064100  | 20144 | 10.336  | 10.112 | 10.424  | 10.200 | -0.0014700  | -4,89E-01   |
| 201.455.625.000.000 | 0.95408 | 0.98020 | 0.98361 | 10.097 | -0.0024700  | 0.00063800  | 20146 | 10.318  | 10.110 | 10.407  | 10.199 | -0.0013800  | -0.00013800 |
| 201.467.539.062.500 | 0.95168 | 0.97970 | 0.98146 | 10.095 | -0.0017100  | 0.00051900  | 20147 | 10.302  | 10.108 | 10.391  | 10.198 | -0.0018100  | -0.00023100 |
| 201.480.527.343.750 | 0.94983 | 0.97915 | 0.97989 | 10.092 | -0.0011700  | 0.00034400  | 20148 | 10.273  | 10.106 | 10.363  | 10.197 | -0.0019500  | -6,83E-01   |
| 201.493.535.156.250 | 0.94863 | 0.97860 | 0.97896 | 10.089 | -0.00081100 | 0.00020200  | 20149 | 10.251  | 10.104 | 10.342  | 10.195 | -0.0019900  | 4,87E-01    |
| 201.506.523.437.500 | 0.94772 | 0.97805 | 0.97833 | 10.087 | -0.00064800 | 8,66E-01    | 20151 | 10.221  | 10.102 | 10.313  | 10.194 | -0.0018200  | 0.00017100  |
| 201.519.531.250.000 | 0.94694 | 0.97751 | 0.97782 | 10.084 | -0.00058600 | 6,86E-01    | 20152 | 10.203  | 10.099 | 10.296  | 10.192 | -0.0015400  | 0.00010600  |
| 201.533.613.281.250 | 0.94613 | 0.97692 | 0.97731 | 10.081 | -0.00046200 | 0.00015400  | 20153 | 10.179  | 10.096 | 10.273  | 10.190 | -0.0015400  | -2,77E-01   |
| 201.546.621.093.750 | 0.94569 | 0.97638 | 0.97714 | 10.078 | -0.00016800 | 0.00031200  | 20155 | 10.162  | 10.093 | 10.256  | 10.188 | -0.0016200  | -4,12E-02   |
| 201.559.628.906.250 | 0.94570 | 0.97584 | 0.97743 | 10.076 | 0.00035000  | 0.00041400  | 20156 | 10.137  | 10.090 | 10.233  | 10.185 | -0.0015500  | 8,60E-01    |
| 201.573.710.937.500 | 0.94664 | 0.97526 | 0.97866 | 10.073 | 0.00095200  | 0.00045300  | 20157 | 10.120  | 10.086 | 10.216  | 10.183 | -0.0013900  | 3,77E-01    |
| 201.586.718.750.000 | 0.94828 | 0.97472 | 0.98058 | 10.070 | 0.0015800   | 0.00040200  | 20159 | 10.100  | 10.083 | 10.197  | 10.180 | -0.0014500  | -8,60E-01   |
| 201.600.820.312.500 | 0.95091 | 0.97414 | 0.98350 | 10.067 | 0.0020400   | 0.00027200  | 20160 | 10.081  | 10.079 | 10.179  | 10.177 | -0.0016200  | -3,36E-01   |
| 201.613.828.125.000 | 0.95381 | 0.97361 | 0.98668 | 10.065 | 0.0023100   | 9,16E-01    | 20161 | 10.056  | 10.075 | 10.155  | 10.174 | -0.0015400  | 0.00017700  |
| 201.627.929.687.500 | 0.95718 | 0.97304 | 0.99034 | 10.062 | 0.0022900   | -8,82E-01   | 20163 | 10.039  | 10.071 | 10.139  | 10.171 | -0.0011400  | 0.00013800  |
| 201.640.957.031.250 | 0.96003 | 0.97251 | 0.99347 | 10.060 | 0.0020700   | -0.00017600 | 20164 | 10.025  | 10.067 | 10.125  | 10.168 | -0.0011600  | 5,77E-02    |
| 201.655.058.593.750 | 0.96280 | 0.97194 | 0.99654 | 10.057 | 0.0018100   | -0.00020800 | 20166 | 10.008  | 10.063 | 10.109  | 10.164 | -0.0011200  | 1,82E-01    |
| 201.669.160.156.250 | 0.96514 | 0.97138 | 0.99917 | 10.054 | 0.0014900   | -0.00021700 | 20167 | 0.99934 | 10.059 | 10.095  | 10.161 | -0.0011100  | -3,64E-01   |
| 201.683.261.718.750 | 0.96700 | 0.97081 | 10.013  | 10.051 | 0.0012000   | -0.00022700 | 20168 | 0.99763 | 10.054 | 10.079  | 10.157 | -0.0012300  | -6,91E-01   |
| 201.697.382.812.500 | 0.96853 | 0.97025 | 10.032  | 10.049 | 0.00084800  | -0.00028900 | 20170 | 0.99588 | 10.049 | 10.063  | 10.153 | -0.0013000  | 5,48E-01    |
| 201.711.484.375.000 | 0.96939 | 0.96970 | 10.043  | 10.046 | 0.00038600  | -0.00032300 | 20171 | 0.99395 | 10.044 | 10.044  | 10.149 | -0.0010700  | 0.00014800  |
| 201.725.605.468.750 | 0.96962 | 0.96915 | 10.048  | 10.044 | -6,46E-01   | -0.00029000 | 20173 | 0.99285 | 10.039 | 10.034  | 10.145 | -0.00088700 | 6,11E-01    |
| 201.739.707.031.250 | 0.96921 | 0.96860 | 10.047  | 10.041 | -0.00043300 | -0.00015200 | 20174 | 0.99145 | 10.034 | 10.021  | 10.141 | -0.00089900 | -3,09E-02   |
| 201.753.828.125.000 | 0.96840 | 0.96805 | 10.042  | 10.039 | -0.00049300 | 0.00012100  | 20175 | 0.99032 | 10.029 | 10.010  | 10.137 | -0.00089600 | -6,68E-02   |
| 201.767.949.218.750 | 0.96782 | 0.96751 | 10.039  | 10.036 | -8,94E-01   | 0.00039200  | 20177 | 0.98892 | 10.024 | 0.99973 | 10.132 | -0.00091800 | 3,34E-01    |
| 201.783.164.062.500 | 0.96813 | 0.96694 | 10.046  | 10.034 | 0.00065800  | 0.00066200  | 20178 | 0.98762 | 10.019 | 0.99853 | 10.128 | -0.00079800 | 2,97E-01    |
| 201.797.285.156.250 | 0.96975 | 0.96641 | 10.065  | 10.031 | 0.0018500   | 0.00090500  | 20180 | 0.98658 | 10.013 | 0.99757 | 10.123 | -0.00083100 | -3,42E-01   |

|                     |         |         |         |         |            |             |       |         |         |         |         |             |             |
|---------------------|---------|---------|---------|---------|------------|-------------|-------|---------|---------|---------|---------|-------------|-------------|
| 201.811.406.250.000 | 0.97336 | 0.96588 | 10.104  | 10.029  | 0.0032100  | 0.00085100  | 20181 | 0.98528 | 10.008  | 0.99636 | 10.119  | -0.00089400 | -2,13E-01   |
| 201.826.621.093.750 | 0.97918 | 0.96532 | 10.165  | 10.026  | 0.0043500  | 0.00069400  | 20183 | 0.98395 | 10.002  | 0.99512 | 10.114  | -0.00089300 | 6,43E-02    |
| 201.840.742.187.500 | 0.98612 | 0.96480 | 10.237  | 10.024  | 0.0052500  | 0.00042100  | 20184 | 0.98266 | 0.99969 | 0.99392 | 10.109  | -0.00087500 | 9,64E-01    |
| 201.855.976.562.500 | 0.99458 | 0.96425 | 10.325  | 10.022  | 0.0055800  | 4,22E-01    | 20186 | 0.98138 | 0.99911 | 0.99273 | 10.105  | -0.00061000 | 0.00015800  |
| 201.871.191.406.250 | 10.031  | 0.96371 | 10.414  | 10.020  | 0.0053800  | -0.00035500 | 20187 | 0.98080 | 0.99853 | 0.99224 | 10.100  | -0.00039400 | 1,14E-01    |
| 201.885.332.031.250 | 10.104  | 0.96320 | 10.489  | 10.018  | 0.0045400  | -0.00069000 | 20189 | 0.98023 | 0.99799 | 0.99176 | 10.095  | -0.00057700 | -3,30E-01   |
| 201.900.546.875.000 | 10.164  | 0.96267 | 10.553  | 10.015  | 0.0033500  | -0.00086400 | 20190 | 0.97911 | 0.99741 | 0.99073 | 10.090  | -0.00049100 | 0.00015200  |
| 201.915.781.250.000 | 10.206  | 0.96214 | 10.598  | 10.013  | 0.0019100  | -0.00098700 | 20192 | 0.97873 | 0.99683 | 0.99045 | 10.085  | -0.00011400 | 0.00013300  |
| 201.931.015.625.000 | 10.223  | 0.96162 | 10.618  | 10.011  | 0.00034500 | -0.00103000 | 20193 | 0.97876 | 0.99626 | 0.99057 | 10.081  | -8,60E-01   | -1,25E-01   |
| 201.946.250.000.000 | 10.216  | 0.96111 | 10.614  | 10.009  | -0.0012400 | -0.00107000 | 20195 | 0.97847 | 0.99568 | 0.99037 | 10.076  | -0.00015200 | -1,14E-01   |
| 201.961.484.375.000 | 10.185  | 0.96060 | 10.586  | 10.007  | -0.0029000 | -0.00103000 | 20196 | 0.97830 | 0.99512 | 0.99028 | 10.071  | -0.00012100 | 5,62E-01    |
| 201.976.718.750.000 | 10.128  | 0.96009 | 10.532  | 10.005  | -0.0043900 | -0.00094000 | 20198 | 0.97810 | 0.99455 | 0.99018 | 10.066  | 1,88E-01    | 0.00019600  |
| 201.991.953.125.000 | 10.051  | 0.95959 | 10.459  | 10.004  | -0.0057600 | -0.00085200 | 20199 | 0.97835 | 0.99400 | 0.99053 | 10.062  | 0.00047700  | 0.00010100  |
| 202.007.187.500.000 | 0.99522 | 0.95910 | 10.363  | 10.002  | -0.0069800 | -0.00069000 | 20201 | 0.97956 | 0.99345 | 0.99182 | 10.057  | 0.00032700  | -8,92E-01   |
| 202.022.441.406.250 | 0.98382 | 0.95861 | 10.252  | 10.000  | -0.0078700 | -0.00043600 | 20202 | 0.97935 | 0.99291 | 0.99171 | 10.053  | 0.00020500  | 1,52E-01    |
| 202.038.769.531.250 | 0.97037 | 0.95809 | 10.121  | 0.99983 | -0.0083600 | -0.00019400 | 20204 | 0.98021 | 0.99234 | 0.99266 | 10.048  | 0.00037500  | 9,20E-01    |
| 202.054.023.437.500 | 0.95742 | 0.95761 | 0.99947 | 0.99966 | -0.0084800 | 2,68E-01    | 20205 | 0.98054 | 0.99182 | 0.99308 | 10.044  | 0.00049600  | 4,22E-01    |
| 202.070.371.093.750 | 0.94357 | 0.95711 | 0.98595 | 0.99950 | -0.0082800 | 0.00028600  | 20207 | 0.98177 | 0.99128 | 0.99442 | 10.039  | 0.00050900  | -4,98E-01   |
| 202.085.625.000.000 | 0.93127 | 0.95664 | 0.97397 | 0.99934 | -0.0075800 | 0.00053900  | 20209 | 0.98215 | 0.99079 | 0.99488 | 10.035  | 0.00033800  | 6,36E-01    |
| 202.101.972.656.250 | 0.91962 | 0.95615 | 0.96266 | 0.99919 | -0.0065700 | 0.00075300  | 20210 | 0.98284 | 0.99027 | 0.99567 | 10.031  | 0.00071000  | 0.00011900  |
| 202.117.226.562.500 | 0.91050 | 0.95569 | 0.95385 | 0.99904 | -0.0052000 | 0.00098200  | 20212 | 0.98439 | 0.98981 | 0.99731 | 10.027  | 0.00071300  | -0.00011000 |
| 202.133.574.218.750 | 0.90320 | 0.95521 | 0.94689 | 0.99890 | -0.0034700 | 0.00113000  | 20213 | 0.98510 | 0.98933 | 0.99811 | 10.023  | 0.00036300  | -5,64E-01   |
| 202.149.921.875.000 | 0.89916 | 0.95473 | 0.94318 | 0.99876 | -0.0015000 | 0.00114000  | 20215 | 0.98558 | 0.98886 | 0.99869 | 10.020  | 0.00052800  | 9,34E-01    |
| 202.166.289.062.500 | 0.89830 | 0.95426 | 0.94266 | 0.99862 | 0.00027200 | 0.00103000  | 20217 | 0.98682 | 0.98841 | 10.000  | 10.016  | 0.00066800  | -3,72E-01   |
| 202.181.542.968.750 | 0.90002 | 0.95382 | 0.94469 | 0.99850 | 0.0017600  | 0.00074400  | 20218 | 0.98769 | 0.98801 | 10.010  | 10.013  | 0.00041100  | -4,43E-01   |
| 202.197.910.156.250 | 0.90387 | 0.95336 | 0.94888 | 0.99837 | 0.0026200  | 0.00033200  | 20220 | 0.98812 | 0.98759 | 10.015  | 10.010  | 0.00052800  | 6,88E-01    |
| 202.214.277.343.750 | 0.90860 | 0.95290 | 0.95395 | 0.99825 | 0.0028500  | -4,52E-01   | 20221 | 0.98942 | 0.98719 | 10.029  | 10.007  | 0.00063600  | -1,66E-02   |
| 202.230.644.531.250 | 0.91319 | 0.95245 | 0.95888 | 0.99813 | 0.0024800  | -0.00030100 | 20223 | 0.99021 | 0.98680 | 10.038  | 10.004  | 0.00052300  | -1,58E-01   |
| 202.248.105.468.750 | 0.91698 | 0.95197 | 0.96302 | 0.99802 | 0.0018300  | -0.00038800 | 20225 | 0.99119 | 0.98640 | 10.049  | 10.001  | 0.00058300  | 1,47E-01    |
| 202.264.472.656.250 | 0.91938 | 0.95153 | 0.96576 | 0.99791 | 0.0011600  | -0.00035100 | 20226 | 0.99218 | 0.98604 | 10.060  | 0.99983 | 0.00057300  | -3,37E-01   |
| 202.280.859.375.000 | 0.92079 | 0.95110 | 0.96750 | 0.99781 | 0.00067800 | -0.00020700 | 20228 | 0.99306 | 0.98570 | 10.070  | 0.99959 | 0.00047200  | -6,06E-01   |
| 202.297.226.562.500 | 0.92160 | 0.95066 | 0.96865 | 0.99771 | 0.00048700 | -1,46E-01   | 20230 | 0.99372 | 0.98537 | 10.077  | 0.99935 | 0.00037400  | -5,34E-01   |
| 202.314.707.031.250 | 0.92243 | 0.95021 | 0.96984 | 0.99761 | 0.00062900 | 0.00015600  | 20231 | 0.99433 | 0.98503 | 10.084  | 0.99912 | 0.00029100  | -5,79E-01   |
| 202.331.093.750.000 | 0.92373 | 0.94979 | 0.97147 | 0.99753 | 0.0010200  | 0.00027000  | 20233 | 0.99471 | 0.98473 | 10.089  | 0.99891 | 0.00017800  | -3,91E-01   |
| 202.347.480.468.750 | 0.92576 | 0.94937 | 0.97383 | 0.99744 | 0.0015100  | 0.00029400  | 20235 | 0.99491 | 0.98444 | 10.092  | 0.99872 | 0.00016300  | -7,17E-01   |

|                     |         |         |         |         |             |             |       |         |         |         |         |             |             |
|---------------------|---------|---------|---------|---------|-------------|-------------|-------|---------|---------|---------|---------|-------------|-------------|
| 202.364.960.937.500 | 0.92885 | 0.94893 | 0.97728 | 0.99736 | 0.0020100   | 0.00026600  | 20236 | 0.99526 | 0.98414 | 10.096  | 0.99852 | -6,47E-01   | -0.00011900 |
| 202.382.441.406.250 | 0.93279 | 0.94849 | 0.98158 | 0.99728 | 0.0024400   | 0.00024700  | 20238 | 0.99468 | 0.98386 | 10.092  | 0.99834 | -0.00025300 | -1,00E+00   |
| 202.398.828.125.000 | 0.93712 | 0.94809 | 0.98624 | 0.99721 | 0.0028500   | 0.00020700  | 20240 | 0.99441 | 0.98361 | 10.090  | 0.99819 | -0.00040400 | -7,02E-01   |
| 202.416.328.125.000 | 0.94245 | 0.94766 | 0.99192 | 0.99714 | 0.0031400   | 0.00013200  | 20242 | 0.99332 | 0.98335 | 10.080  | 0.99804 | -0.00049000 | 3,28E-01    |
| 202.433.808.593.750 | 0.94811 | 0.94724 | 0.99794 | 0.99708 | 0.0033100   | 6,55E-01    | 20243 | 0.99269 | 0.98311 | 10.075  | 0.99790 | -0.00028900 | -3,16E-01   |
| 202.451.308.593.750 | 0.95403 | 0.94683 | 10.042  | 0.99701 | 0.0033700   | -3,74E-01   | 20245 | 0.99231 | 0.98288 | 10.072  | 0.99777 | -0.00060100 | -0.00015600 |
| 202.467.714.843.750 | 0.95954 | 0.94644 | 10.101  | 0.99696 | 0.0031800   | -0.00016900 | 20247 | 0.99066 | 0.98268 | 10.056  | 0.99766 | -0.00082000 | -6,42E-01   |
| 202.485.214.843.750 | 0.96482 | 0.94603 | 10.157  | 0.99691 | 0.0028000   | -0.00026600 | 20249 | 0.98953 | 0.98247 | 10.046  | 0.99756 | -0.00081800 | 2,25E-01    |
| 202.502.734.375.000 | 0.96934 | 0.94563 | 10.206  | 0.99686 | 0.0022500   | -0.00032600 | 20250 | 0.98779 | 0.98228 | 10.030  | 0.99747 | -0.00074100 | -1,46E-01   |
| 202.521.328.125.000 | 0.97296 | 0.94521 | 10.246  | 0.99681 | 0.0016200   | -0.00034500 | 20252 | 0.98685 | 0.98209 | 10.021  | 0.99738 | -0.00087100 | -3,03E-01   |
| 202.538.847.656.250 | 0.97520 | 0.94481 | 10.272  | 0.99677 | 0.0010100   | -0.00032300 | 20254 | 0.98464 | 0.98192 | 10.000  | 0.99731 | -0.00085000 | 5,42E-01    |
| 202.556.367.187.500 | 0.97649 | 0.94442 | 10.288  | 0.99673 | 0.00049000  | -0.00025300 | 20256 | 0.98387 | 0.98176 | 0.99936 | 0.99725 | -0.00068100 | 3,75E-01    |
| 202.573.867.187.500 | 0.97692 | 0.94403 | 10.296  | 0.99670 | 0.00012200  | -0.00015000 | 20257 | 0.98226 | 0.98161 | 0.99785 | 0.99720 | -0.00071900 | 4,89E-01    |
| 202.591.406.250.000 | 0.97692 | 0.94365 | 10.299  | 0.99667 | -3,55E-01   | -3,60E-01   | 20259 | 0.98135 | 0.98147 | 0.99705 | 0.99716 | -0.00051000 | 9,39E-02    |
| 202.610.019.531.250 | 0.97679 | 0.94325 | 10.302  | 0.99664 | -7,93E-02   | 3,39E-01    | 20261 | 0.98042 | 0.98133 | 0.99622 | 0.99713 | -0.00068500 | -1,03E-01   |
| 202.627.539.062.500 | 0.97689 | 0.94287 | 10.306  | 0.99662 | 8,69E-01    | 1,58E-01    | 20263 | 0.97888 | 0.98121 | 0.99478 | 0.99711 | -0.00054700 | 5,70E-01    |
| 202.646.171.875.000 | 0.97710 | 0.94247 | 10.312  | 0.99660 | 4,90E-01    | -8,43E-01   | 20265 | 0.97844 | 0.98109 | 0.99445 | 0.99710 | -0.00047900 | 2,18E-01    |
| 202.663.710.937.500 | 0.97706 | 0.94211 | 10.315  | 0.99659 | -0.00021800 | -0.00019400 | 20266 | 0.97714 | 0.98099 | 0.99325 | 0.99710 | -0.00046800 | 5,52E-01    |
| 202.682.343.750.000 | 0.97631 | 0.94172 | 10.312  | 0.99657 | -0.00065200 | -0.00025300 | 20268 | 0.97674 | 0.98089 | 0.99296 | 0.99711 | -0.00027900 | 8,15E-01    |
| 202.700.976.562.500 | 0.97464 | 0.94133 | 10.299  | 0.99656 | -0.0011600  | -0.00026200 | 20270 | 0.97610 | 0.98080 | 0.99243 | 0.99712 | -0.00016500 | 6,58E-01    |
| 202.718.515.625.000 | 0.97212 | 0.94097 | 10.277  | 0.99656 | -0.0016000  | -0.00021300 | 20272 | 0.97615 | 0.98072 | 0.99257 | 0.99714 | -4,13E-01   | 2,25E-01    |
| 202.737.167.968.750 | 0.96885 | 0.94060 | 10.248  | 0.99655 | -0.0019300  | -0.00016800 | 20274 | 0.97595 | 0.98065 | 0.99248 | 0.99717 | -8,33E-01   | 5,17E-01    |
| 202.755.800.781.250 | 0.96492 | 0.94022 | 10.213  | 0.99655 | -0.0022300  | -0.00017000 | 20276 | 0.97584 | 0.98058 | 0.99247 | 0.99721 | 0.00015100  | 0.00011500  |
| 202.774.453.125.000 | 0.96055 | 0.93985 | 10.172  | 0.99655 | -0.0025600  | -0.00021600 | 20277 | 0.97652 | 0.98052 | 0.99326 | 0.99726 | 0.00034600  | 3,05E-01    |
| 202.793.105.468.750 | 0.95536 | 0.93948 | 10.124  | 0.99656 | -0.0030300  | -0.00025100 | 20279 | 0.97713 | 0.98046 | 0.99398 | 0.99731 | 0.00026500  | 9,25E-02    |
| 202.811.777.343.750 | 0.94923 | 0.93912 | 10.067  | 0.99656 | -0.0035000  | -0.00021200 | 20281 | 0.97751 | 0.98042 | 0.99446 | 0.99737 | 0.00038100  | 8,42E-01    |
| 202.830.429.687.500 | 0.94229 | 0.93875 | 10.001  | 0.99657 | -0.0038200  | -9,04E-01   | 20283 | 0.97855 | 0.98037 | 0.99561 | 0.99743 | 0.00057900  | 4,41E-01    |
| 202.849.101.562.500 | 0.93495 | 0.93839 | 0.99315 | 0.99659 | -0.0038400  | 9,43E-01    | 20285 | 0.97967 | 0.98034 | 0.99683 | 0.99750 | 0.00054500  | -3,13E-01   |
| 202.867.753.906.250 | 0.92796 | 0.93803 | 0.98652 | 0.99660 | -0.0034700  | 0.00023500  | 20287 | 0.98059 | 0.98031 | 0.99785 | 0.99757 | 0.00046200  | 2,11E-01    |
| 202.887.539.062.500 | 0.92161 | 0.93766 | 0.98057 | 0.99662 | -0.0029400  | 0.00026100  | 20289 | 0.98145 | 0.98028 | 0.99882 | 0.99765 | 0.00062700  | 1,17E-01    |
| 202.906.210.937.500 | 0.91667 | 0.93730 | 0.97600 | 0.99664 | -0.0024700  | 0.00019900  | 20291 | 0.98300 | 0.98025 | 10.005  | 0.99774 | 0.00050700  | -8,65E-01   |
| 202.924.882.812.500 | 0.91238 | 0.93695 | 0.97209 | 0.99666 | -0.0021900  | 0.00011500  | 20292 | 0.98334 | 0.98024 | 10.009  | 0.99782 | 0.00030300  | -2,48E-02   |
| 202.944.667.968.750 | 0.90823 | 0.93658 | 0.96833 | 0.99668 | -0.0020300  | 7,96E-01    | 20294 | 0.98416 | 0.98022 | 10.019  | 0.99792 | 0.00049800  | 5,91E-01    |
| 202.963.359.375.000 | 0.90459 | 0.93623 | 0.96506 | 0.99670 | -0.0018900  | 8,72E-01    | 20296 | 0.98526 | 0.98021 | 10.031  | 0.99801 | 0.00053100  | -1,57E-01   |
| 202.983.144.531.250 | 0.90097 | 0.93587 | 0.96183 | 0.99673 | -0.0016900  | 0.00014900  | 20298 | 0.98621 | 0.98020 | 10.041  | 0.99811 | 0.00043700  | -1,59E-01   |

|                     |         |         |         |         |             |             |       |         |         |         |         |             |             |
|---------------------|---------|---------|---------|---------|-------------|-------------|-------|---------|---------|---------|---------|-------------|-------------|
| 203.001.835.937.500 | 0.89808 | 0.93552 | 0.95931 | 0.99676 | -0.0013200  | 0.00025200  | 20300 | 0.98694 | 0.98019 | 10.050  | 0.99820 | 0.00046900  | -5,72E-01   |
| 203.021.621.093.750 | 0.89591 | 0.93516 | 0.95753 | 0.99679 | -0.00071900 | 0.00037300  | 20302 | 0.98801 | 0.98018 | 10.061  | 0.99830 | 0.00021700  | -0.00012900 |
| 203.041.425.781.250 | 0.89523 | 0.93480 | 0.95725 | 0.99682 | 0.00015900  | 0.00046300  | 20304 | 0.98780 | 0.98017 | 10.060  | 0.99841 | -4,32E-01   | -5,25E-01   |
| 203.061.230.468.750 | 0.89654 | 0.93444 | 0.95895 | 0.99685 | 0.0011100   | 0.00046000  | 20306 | 0.98784 | 0.98017 | 10.062  | 0.99851 | 9,35E-02    | 4,56E-02    |
| 203.079.941.406.250 | 0.89952 | 0.93410 | 0.96230 | 0.99688 | 0.0019300   | 0.00033300  | 20308 | 0.98784 | 0.98016 | 10.063  | 0.99861 | -2,56E-01   | -1,93E-01   |
| 203.099.746.093.750 | 0.90397 | 0.93374 | 0.96714 | 0.99691 | 0.0024000   | 0.00015200  | 20310 | 0.98774 | 0.98016 | 10.063  | 0.99871 | -6,51E-01   | -6,33E-02   |
| 203.119.570.312.500 | 0.90903 | 0.93339 | 0.97259 | 0.99695 | 0.0025300   | 1,38E-01    | 20312 | 0.98758 | 0.98015 | 10.062  | 0.99882 | -5,06E-01   | 4,34E-01    |
| 203.139.375.000.000 | 0.91400 | 0.93303 | 0.97795 | 0.99698 | 0.0024500   | -4,92E-01   | 20314 | 0.98754 | 0.98014 | 10.063  | 0.99892 | 0.00010700  | -3,43E-01   |
| 203.159.199.218.750 | 0.91874 | 0.93268 | 0.98308 | 0.99702 | 0.0023400   | -4,78E-01   | 20316 | 0.98800 | 0.98013 | 10.069  | 0.99902 | -0.00018700 | -0.00010500 |
| 203.180.136.718.750 | 0.92352 | 0.93230 | 0.98828 | 0.99705 | 0.0022600   | -3,09E-01   | 20318 | 0.98678 | 0.98012 | 10.058  | 0.99912 | -0.00032100 | 9,33E-03    |
| 203.199.960.937.500 | 0.92795 | 0.93195 | 0.99309 | 0.99709 | 0.0022100   | -3,71E-01   | 20320 | 0.98669 | 0.98010 | 10.058  | 0.99921 | -0.00018300 | 2,22E-01    |
| 203.219.804.687.500 | 0.93229 | 0.93159 | 0.99782 | 0.99712 | 0.0021100   | -7,01E-01   | 20322 | 0.98606 | 0.98008 | 10.053  | 0.99930 | -0.00023300 | -1,21E-01   |
| 203.239.648.437.500 | 0.93632 | 0.93124 | 10.022  | 0.99716 | 0.0019300   | -9,03E-01   | 20324 | 0.98577 | 0.98006 | 10.051  | 0.99938 | -0.00023100 | -4,16E-01   |
| 203.260.585.937.500 | 0.94017 | 0.93086 | 10.065  | 0.99719 | 0.0017400   | -0.00010800 | 20326 | 0.98511 | 0.98003 | 10.046  | 0.99947 | -0.00040300 | -5,36E-01   |
| 203.280.429.687.500 | 0.94342 | 0.93051 | 10.101  | 0.99723 | 0.0014900   | -0.00013000 | 20328 | 0.98413 | 0.98000 | 10.037  | 0.99954 | -0.00044900 | 1,15E-01    |
| 203.301.386.718.750 | 0.94625 | 0.93013 | 10.134  | 0.99726 | 0.0012100   | -0.00013700 | 20330 | 0.98328 | 0.97996 | 10.029  | 0.99962 | -0.00035600 | 1,08E-01    |
| 203.321.250.000.000 | 0.94836 | 0.92978 | 10.159  | 0.99730 | 0.00093100  | -0.00012900 | 20332 | 0.98268 | 0.97992 | 10.024  | 0.99969 | -0.00040500 | -1,66E-01   |
| 203.342.207.031.250 | 0.95005 | 0.92940 | 10.180  | 0.99733 | 0.00068300  | -0.00011800 | 20334 | 0.98163 | 0.97987 | 10.015  | 0.99975 | -0.00042300 | 3,14E-01    |
| 203.363.164.062.500 | 0.95123 | 0.92903 | 10.196  | 0.99737 | 0.00043500  | -0.00012500 | 20336 | 0.98090 | 0.97982 | 10.009  | 0.99982 | -0.00027300 | 2,22E-02    |
| 203.383.046.875.000 | 0.95182 | 0.92867 | 10.205  | 0.99740 | 0.00017100  | -0.00013200 | 20338 | 0.98051 | 0.97977 | 10.006  | 0.99987 | -0.00041400 | -1,98E-01   |
| 203.404.023.437.500 | 0.95193 | 0.92830 | 10.211  | 0.99743 | -0.00010300 | -0.00013900 | 20340 | 0.97921 | 0.97971 | 0.99943 | 0.99993 | -0.00035400 | 5,07E-01    |
| 203.425.000.000.000 | 0.95139 | 0.92792 | 10.209  | 0.99746 | -0.00041100 | -0.00014700 | 20342 | 0.97902 | 0.97965 | 0.99935 | 0.99998 | -0.00020100 | 6,05E-02    |
| 203.445.976.562.500 | 0.95020 | 0.92755 | 10.202  | 0.99750 | -0.00072000 | -0.00014700 | 20345 | 0.97836 | 0.97958 | 0.99881 | 10.000  | -0.00032900 | -5,60E-02   |
| 203.466.972.656.250 | 0.94837 | 0.92717 | 10.187  | 0.99753 | -0.0010300  | -0.00012300 | 20347 | 0.97764 | 0.97951 | 0.99820 | 10.001  | -0.00022500 | 2,42E-01    |
| 203.487.968.750.000 | 0.94589 | 0.92680 | 10.167  | 0.99756 | -0.0012400  | -6,17E-01   | 20349 | 0.97742 | 0.97943 | 0.99809 | 10.001  | -0.00022700 | -1,93E-01   |
| 203.508.964.843.750 | 0.94318 | 0.92642 | 10.144  | 0.99759 | -0.0012900  | 1,59E-01    | 20351 | 0.97669 | 0.97936 | 0.99747 | 10.001  | -0.00030600 | 8,03E-02    |
| 203.529.960.937.500 | 0.94048 | 0.92605 | 10.121  | 0.99762 | -0.0011700  | 9,02E-01    | 20353 | 0.97614 | 0.97928 | 0.99703 | 10.002  | -0.00019400 | 5,13E-01    |
| 203.550.957.031.250 | 0.93828 | 0.92567 | 10.103  | 0.99766 | -0.00090800 | 0.00012500  | 20355 | 0.97587 | 0.97919 | 0.99688 | 10.002  | -9,03E-01   | 1,55E-03    |
| 203.573.085.937.500 | 0.93657 | 0.92528 | 10.090  | 0.99769 | -0.00063100 | 0.00011100  | 20357 | 0.97575 | 0.97910 | 0.99687 | 10.002  | -0.00019300 | -1,35E-01   |
| 203.594.101.562.500 | 0.93555 | 0.92490 | 10.084  | 0.99772 | -0.00042900 | 4,71E-01    | 20359 | 0.97504 | 0.97901 | 0.99627 | 10.002  | -0.00014900 | 4,82E-01    |
| 203.615.117.187.500 | 0.93476 | 0.92453 | 10.080  | 0.99775 | -0.00043300 | -4,42E-01   | 20362 | 0.97512 | 0.97891 | 0.99647 | 10.003  | 9,52E-02    | 9,69E-02    |
| 203.637.246.093.750 | 0.93368 | 0.92413 | 10.073  | 0.99778 | -0.00062000 | -0.00013700 | 20364 | 0.97508 | 0.97881 | 0.99654 | 10.003  | -0.00010700 | -5,85E-01   |
| 203.658.281.250.000 | 0.93209 | 0.92376 | 10.061  | 0.99781 | -0.0010200  | -0.00020200 | 20366 | 0.97466 | 0.97871 | 0.99623 | 10.003  | -0.00024300 | -8,98E-03   |
| 203.680.410.156.250 | 0.92927 | 0.92336 | 10.037  | 0.99784 | -0.0014900  | -0.00020700 | 20368 | 0.97403 | 0.97860 | 0.99572 | 10.003  | -0.00011100 | 3,06E-01    |
| 203.701.445.312.500 | 0.92565 | 0.92299 | 10.005  | 0.99787 | -0.0019100  | -0.00014800 | 20370 | 0.97418 | 0.97850 | 0.99598 | 10.003  | -0.00011100 | -1,85E-01   |

|                     |         |         |         |         |             |             |       |         |         |         |         |             |           |
|---------------------|---------|---------|---------|---------|-------------|-------------|-------|---------|---------|---------|---------|-------------|-----------|
| 203.723.613.281.250 | 0.92099 | 0.92259 | 0.99630 | 0.99790 | -0.0021300  | -1.53E-01   | 20372 | 0.97355 | 0.97838 | 0.99547 | 10.003  | -0.00019100 | 9,96E-02  |
| 203.745.761.718.750 | 0.91619 | 0.92220 | 0.99193 | 0.99793 | -0.0019800  | 0.00014100  | 20375 | 0.97334 | 0.97827 | 0.99537 | 10.003  | -6,71E-01   | 3,24E-01  |
| 203.766.816.406.250 | 0.91243 | 0.92182 | 0.98857 | 0.99796 | -0.0015200  | 0.00024000  | 20377 | 0.97326 | 0.97815 | 0.99540 | 10.003  | -5,07E-01   | -3,36E-01 |
| 203.788.964.843.750 | 0.90961 | 0.92143 | 0.98617 | 0.99799 | -0.00094600 | 0.00026000  | 20379 | 0.97312 | 0.97803 | 0.99538 | 10.003  | -0.00021200 | -2,79E-01 |
| 203.811.152.343.750 | 0.90823 | 0.92103 | 0.98522 | 0.99802 | -0.00037300 | 0.00021200  | 20381 | 0.97232 | 0.97791 | 0.99469 | 10.003  | -0.00017400 | 7,45E-01  |
| 203.833.320.312.500 | 0.90795 | 0.92064 | 0.98536 | 0.99805 | -7,50E-02   | 0.00010800  | 20383 | 0.97235 | 0.97778 | 0.99483 | 10.003  | 0.00011800  | 4,88E-01  |
| 203.855.488.281.250 | 0.90820 | 0.92024 | 0.98603 | 0.99807 | 0.00010500  | 1,28E-01    | 20386 | 0.97284 | 0.97765 | 0.99545 | 10.003  | 4,22E-01    | -5,29E-01 |
| 203.877.675.781.250 | 0.90842 | 0.91985 | 0.98667 | 0.99810 | 4,93E-01    | -4,05E-01   | 20388 | 0.97253 | 0.97752 | 0.99525 | 10.002  | -0.00011700 | -1,40E-01 |
| 203.899.863.281.250 | 0.90842 | 0.91945 | 0.98709 | 0.99813 | -7,43E-01   | -5,80E-01   | 20390 | 0.97233 | 0.97739 | 0.99516 | 10.002  | -1,98E-01   | 2,83E-01  |
| 203.922.070.312.500 | 0.90809 | 0.91906 | 0.98719 | 0.99816 | -0.00020800 | -5,51E-01   | 20392 | 0.97245 | 0.97725 | 0.99539 | 10.002  | 8,98E-02    | 1,13E-01  |
| 203.945.371.093.750 | 0.90747 | 0.91865 | 0.98701 | 0.99819 | -0.00032500 | -5,33E-01   | 20395 | 0.97237 | 0.97711 | 0.99543 | 10.002  | 3,17E-01    | -2,07E-01 |
| 203.967.578.125.000 | 0.90661 | 0.91825 | 0.98657 | 0.99822 | -0.00045100 | -3,31E-01   | 20397 | 0.97259 | 0.97697 | 0.99577 | 10.002  | -8,54E-01   | -2,30E-01 |
| 203.989.785.156.250 | 0.90547 | 0.91786 | 0.98585 | 0.99824 | -0.00047200 | 3,69E-01    | 20399 | 0.97199 | 0.97683 | 0.99528 | 10.001  | -7,03E-01   | 3,02E-01  |
| 204.013.105.468.750 | 0.90446 | 0.91745 | 0.98529 | 0.99827 | -0.00028300 | 0.00012800  | 20401 | 0.97227 | 0.97669 | 0.99568 | 10.001  | 5,23E-01    | 4,61E-01  |
| 204.035.332.031.250 | 0.90418 | 0.91705 | 0.98543 | 0.99830 | 0.00011200  | 0.00018300  | 20404 | 0.97223 | 0.97654 | 0.99575 | 10.001  | 0.00014000  | 1,18E-01  |
| 204.058.652.343.750 | 0.90497 | 0.91664 | 0.98665 | 0.99833 | 0.00055000  | 0.00017600  | 20406 | 0.97291 | 0.97639 | 0.99655 | 10.000  | 0.00010600  | -5,74E-01 |
| 204.080.878.906.250 | 0.90669 | 0.91625 | 0.98879 | 0.99835 | 0.00091300  | 1,00E+00    | 20408 | 0.97271 | 0.97625 | 0.99647 | 10.000  | -0.00012200 | -1,61E-02 |
| 204.104.238.281.250 | 0.90913 | 0.91583 | 0.99167 | 0.99838 | 0.00101000  | -1,06E-01   | 20410 | 0.97235 | 0.97610 | 0.99623 | 0.99997 | 9,89E-01    | 5,41E-01  |
| 204.127.578.125.000 | 0.91139 | 0.91542 | 0.99438 | 0.99841 | 0.00086300  | -9,32E-01   | 20413 | 0.97317 | 0.97594 | 0.99717 | 0.99994 | 0.00013100  | -2,43E-01 |
| 204.149.824.218.750 | 0.91306 | 0.91503 | 0.99647 | 0.99843 | 0.00058200  | -0.00012900 | 20415 | 0.97295 | 0.97580 | 0.99706 | 0.99991 | -1,21E-01   | 2,68E-01  |
| 204.173.183.593.750 | 0.91404 | 0.91462 | 0.99789 | 0.99846 | 0.00027400  | -0.00012300 | 20417 | 0.97312 | 0.97564 | 0.99734 | 0.99987 | 0.00025300  | 4,89E-01  |
| 204.196.562.500.000 | 0.91434 | 0.91420 | 0.99862 | 0.99849 | 6,25E-02    | -9,97E-01   | 20420 | 0.97413 | 0.97549 | 0.99848 | 0.99983 | 0.00021600  | -3,72E-01 |
| 204.219.921.875.000 | 0.91407 | 0.91379 | 0.99879 | 0.99852 | -0.00019200 | -7,54E-01   | 20422 | 0.97413 | 0.97533 | 0.99859 | 0.99979 | 7,94E-01    | 1,02E-01  |
| 204.243.300.781.250 | 0.91344 | 0.91338 | 0.99860 | 0.99854 | -0.00034600 | -5,06E-01   | 20424 | 0.97450 | 0.97518 | 0.99908 | 0.99976 | 0.00026400  | 3,91E-01  |
| 204.266.679.687.500 | 0.91245 | 0.91297 | 0.99805 | 0.99857 | -0.00042900 | -1,15E-01   | 20427 | 0.97536 | 0.97502 | 10.001  | 0.99972 | 0.00026200  | -1,74E-01 |
| 204.290.078.125.000 | 0.91143 | 0.91256 | 0.99747 | 0.99860 | -0.00040000 | 2,41E-01    | 20429 | 0.97573 | 0.97487 | 10.005  | 0.99968 | 0.00018200  | 1,81E-02  |
| 204.313.476.562.500 | 0.91058 | 0.91215 | 0.99706 | 0.99862 | -0.00031700 | 5,19E-01    | 20431 | 0.97622 | 0.97471 | 10.011  | 0.99964 | 0.00027000  | 4,77E-03  |
| 204.336.875.000.000 | 0.90995 | 0.91174 | 0.99686 | 0.99865 | -0.00015700 | 8,92E-01    | 20434 | 0.97700 | 0.97456 | 10.020  | 0.99960 | 0.00018500  | -5,01E-01 |
| 204.361.386.718.750 | 0.90983 | 0.91131 | 0.99720 | 0.99868 | 0.00011100  | 0.00011900  | 20436 | 0.97710 | 0.97440 | 10.023  | 0.99956 | 3,05E-01    | -5,50E-02 |
| 204.384.804.687.500 | 0.91048 | 0.91090 | 0.99829 | 0.99870 | 0.00041500  | 0.00011700  | 20438 | 0.97714 | 0.97425 | 10.024  | 0.99953 | 0.00015800  | 2,52E-01  |
| 204.408.203.125.000 | 0.91178 | 0.91049 | 10.000  | 0.99873 | 0.00065900  | 9,12E-01    | 20441 | 0.97784 | 0.97409 | 10.032  | 0.99949 | 0.00014900  | -1,98E-01 |
| 204.432.753.906.250 | 0.91365 | 0.91006 | 10.023  | 0.99875 | 0.00085200  | 6,00E-01    | 20443 | 0.97785 | 0.97393 | 10.034  | 0.99945 | 6,36E-01    | -2,41E-01 |
| 204.456.171.875.000 | 0.91586 | 0.90965 | 10.050  | 0.99878 | 0.00094700  | -3,26E-02   | 20446 | 0.97815 | 0.97378 | 10.038  | 0.99942 | 3,30E-01    | -1,30E-01 |
| 204.480.722.656.250 | 0.91819 | 0.90923 | 10.078  | 0.99881 | 0.00083700  | -8,50E-01   | 20448 | 0.97801 | 0.97363 | 10.038  | 0.99938 | 1,31E-02    | -4,18E-01 |
| 204.504.160.156.250 | 0.91988 | 0.90882 | 10.099  | 0.99883 | 0.00053900  | -0.00015000 | 20450 | 0.97815 | 0.97348 | 10.040  | 0.99935 | -0.00016800 | -7,17E-02 |

|                     |         |         |         |         |             |             |       |         |         |         |         |             |           |
|---------------------|---------|---------|---------|---------|-------------|-------------|-------|---------|---------|---------|---------|-------------|-----------|
| 204.528.710.937.500 | 0.92078 | 0.90839 | 10.112  | 0.99886 | 0.00011600  | -0.00017600 | 20453 | 0.97721 | 0.97333 | 10.032  | 0.99932 | -3,31E-01   | 4,80E-01  |
| 204.553.281.250.000 | 0.92045 | 0.90796 | 10.114  | 0.99889 | -0.00032400 | -0.00015000 | 20455 | 0.97799 | 0.97318 | 10.041  | 0.99929 | 6,81E-01    | -3,93E-01 |
| 204.577.851.562.500 | 0.91918 | 0.90754 | 10.106  | 0.99891 | -0.00061900 | -7,80E-01   | 20458 | 0.97754 | 0.97303 | 10.038  | 0.99926 | -0.00022600 | -5,66E-01 |
| 204.601.308.593.750 | 0.91747 | 0.90713 | 10.093  | 0.99894 | -0.00069900 | -5,39E-03   | 20460 | 0.97691 | 0.97289 | 10.032  | 0.99923 | -0.00020400 | 1,55E-01  |
| 204.625.898.437.500 | 0.91582 | 0.90671 | 10.081  | 0.99897 | -0.00062200 | 3,83E-01    | 20463 | 0.97656 | 0.97274 | 10.030  | 0.99920 | -0.00015200 | 1,81E-01  |
| 204.650.488.281.250 | 0.91442 | 0.90628 | 10.071  | 0.99899 | -0.00051000 | 2,67E-01    | 20465 | 0.97616 | 0.97260 | 10.027  | 0.99918 | -0.00011500 | -6,10E-02 |
| 204.675.078.125.000 | 0.91331 | 0.90586 | 10.065  | 0.99902 | -0.00049000 | -2,01E-01   | 20468 | 0.97600 | 0.97246 | 10.027  | 0.99916 | -0.00018200 | -3,92E-01 |
| 204.699.687.500.000 | 0.91200 | 0.90543 | 10.056  | 0.99905 | -0.00061000 | -7,13E-01   | 20470 | 0.97526 | 0.97232 | 10.021  | 0.99914 | -0.00030800 | -1,48E-01 |
| 204.724.296.875.000 | 0.91031 | 0.90501 | 10.044  | 0.99907 | -0.00084100 | -9,72E-01   | 20472 | 0.97448 | 0.97219 | 10.014  | 0.99912 | -0.00025500 | 4,03E-01  |
| 204.750.019.531.250 | 0.90777 | 0.90457 | 10.023  | 0.99910 | -0.0011000  | -8,18E-01   | 20475 | 0.97398 | 0.97205 | 10.010  | 0.99910 | -0.00010500 | 6,42E-02  |
| 204.774.648.437.500 | 0.90478 | 0.90414 | 0.99977 | 0.99913 | -0.0012500  | -2,15E-01   | 20477 | 0.97395 | 0.97191 | 10.011  | 0.99909 | -0.00022200 | -4,74E-01 |
| 204.799.277.343.750 | 0.90160 | 0.90372 | 0.99703 | 0.99916 | -0.0012000  | 5,95E-01    | 20480 | 0.97289 | 0.97178 | 10.002  | 0.99908 | -0.00033800 | -1,86E-01 |
| 204.823.906.250.000 | 0.89885 | 0.90330 | 0.99473 | 0.99918 | -0.00096000 | 0.00011400  | 20482 | 0.97229 | 0.97166 | 0.99970 | 0.99907 | -0.00031400 | 1,13E-01  |
| 204.849.667.968.750 | 0.89676 | 0.90286 | 0.99312 | 0.99921 | -0.00063000 | 0.00013200  | 20485 | 0.97130 | 0.97153 | 0.99884 | 0.99906 | -0.00028100 | 1,95E-01  |
| 204.874.296.875.000 | 0.89567 | 0.90244 | 0.99248 | 0.99924 | -0.00029300 | 0.00011000  | 20487 | 0.97087 | 0.97140 | 0.99852 | 0.99905 | -0.00021600 | 2,41E-01  |
| 204.900.078.125.000 | 0.89529 | 0.90200 | 0.99256 | 0.99927 | -7,32E-01   | 7,27E-01    | 20490 | 0.97022 | 0.97128 | 0.99799 | 0.99905 | -0.00016000 | 2,48E-01  |
| 204.924.726.562.500 | 0.89531 | 0.90158 | 0.99302 | 0.99930 | 7,38E-01    | 4,89E-01    | 20492 | 0.97006 | 0.97116 | 0.99795 | 0.99904 | -9,05E-01   | -8,17E-02 |
| 204.950.507.812.500 | 0.89566 | 0.90114 | 0.99384 | 0.99933 | 0.00017400  | 2,45E-01    | 20495 | 0.96976 | 0.97103 | 0.99777 | 0.99904 | -0.00020100 | -7,87E-02 |
| 204.975.175.781.250 | 0.89618 | 0.90072 | 0.99481 | 0.99935 | 0.00019800  | -4,32E-02   | 20498 | 0.96905 | 0.97092 | 0.99717 | 0.99904 | -0.00013000 | 3,62E-01  |
| 205.000.976.562.500 | 0.89666 | 0.90029 | 0.99575 | 0.99938 | 0.00015200  | -2,54E-01   | 20500 | 0.96910 | 0.97080 | 0.99735 | 0.99904 | -1,85E-01   | 1,43E-01  |
| 205.026.777.343.750 | 0.89696 | 0.89985 | 0.99653 | 0.99941 | 6,67E-01    | -3,44E-01   | 20503 | 0.96895 | 0.97068 | 0.99732 | 0.99905 | -5,66E-01   | -1,23E-01 |
| 205.052.597.656.250 | 0.89700 | 0.89941 | 0.99703 | 0.99944 | -2,57E-01   | -3,23E-01   | 20505 | 0.96881 | 0.97056 | 0.99730 | 0.99905 | -8,23E-01   | 6,82E-02  |
| 205.078.398.437.500 | 0.89683 | 0.89898 | 0.99732 | 0.99947 | -9,99E-01   | -2,86E-01   | 20508 | 0.96853 | 0.97045 | 0.99713 | 0.99906 | -2,14E-01   | 3,92E-01  |
| 205.104.238.281.250 | 0.89648 | 0.89855 | 0.99744 | 0.99950 | -0.00017300 | -3,09E-01   | 20510 | 0.96870 | 0.97034 | 0.99742 | 0.99906 | 0.00012000  | 7,12E-02  |
| 205.130.058.593.750 | 0.89594 | 0.89811 | 0.99736 | 0.99953 | -0.00026000 | -2,70E-01   | 20513 | 0.96915 | 0.97023 | 0.99799 | 0.99907 | 1,54E-01    | -1,80E-01 |
| 205.155.898.437.500 | 0.89514 | 0.89768 | 0.99702 | 0.99956 | -0.00031300 | -1,39E-01   | 20516 | 0.96878 | 0.97012 | 0.99774 | 0.99908 | 2,74E-01    | 1,41E-01  |
| 205.181.738.281.250 | 0.89432 | 0.89725 | 0.99666 | 0.99959 | -0.00033100 | -8,15E-02   | 20518 | 0.96929 | 0.97001 | 0.99837 | 0.99909 | 8,83E-01    | 4,44E-02  |
| 205.207.578.125.000 | 0.89343 | 0.89681 | 0.99624 | 0.99962 | -0.00035500 | -7,06E-02   | 20521 | 0.96924 | 0.96991 | 0.99844 | 0.99911 | 5,03E-01    | -1,20E-01 |
| 205.233.437.500.000 | 0.89248 | 0.89638 | 0.99575 | 0.99965 | -0.00036800 | 5,44E-02    | 20523 | 0.96955 | 0.96980 | 0.99887 | 0.99912 | 2,63E-01    | 3,79E-02  |
| 205.259.296.875.000 | 0.89153 | 0.89595 | 0.99526 | 0.99968 | -0.00032700 | 2,55E-01    | 20526 | 0.96937 | 0.96970 | 0.99881 | 0.99913 | 6,99E-01    | 1,80E-02  |
| 205.286.289.062.500 | 0.89075 | 0.89550 | 0.99497 | 0.99972 | -0.00023300 | 3,63E-01    | 20529 | 0.96992 | 0.96959 | 0.99948 | 0.99915 | 3,58E-01    | -3,41E-01 |
| 205.312.167.968.750 | 0.89029 | 0.89507 | 0.99497 | 0.99975 | -0.00013500 | 3,72E-01    | 20531 | 0.96956 | 0.96949 | 0.99924 | 0.99917 | -0.00011000 | 5,49E-02  |
| 205.339.179.687.500 | 0.89004 | 0.89463 | 0.99519 | 0.99978 | -3,65E-01   | 5,00E-01    | 20534 | 0.96934 | 0.96939 | 0.99914 | 0.99919 | 6,48E-01    | 4,77E-01  |
| 205.365.078.125.000 | 0.89010 | 0.89420 | 0.99571 | 0.99981 | 0.00012900  | 6,27E-01    | 20537 | 0.96990 | 0.96929 | 0.99982 | 0.99921 | 0.00014200  | -1,77E-01 |
| 205.392.089.843.750 | 0.89072 | 0.89375 | 0.99681 | 0.99984 | 0.00029500  | 4,47E-01    | 20539 | 0.97009 | 0.96919 | 10.001  | 0.99923 | -2,89E-01   | -6,68E-01 |



|                     |         |         |         |         |             |             |       |         |         |         |         |             |           |
|---------------------|---------|---------|---------|---------|-------------|-------------|-------|---------|---------|---------|---------|-------------|-----------|
| 205.417.988.281.250 | 0.89166 | 0.89332 | 0.99821 | 0.99987 | 0.00036600  | -9,59E-02   | 20542 | 0.96975 | 0.96909 | 0.99990 | 0.99925 | -0.00021100 | -1,82E-01 |
| 205.445.039.062.500 | 0.89266 | 0.89288 | 0.99969 | 0.99990 | 0.00024400  | -7,78E-01   | 20545 | 0.96897 | 0.96900 | 0.99925 | 0.99927 | -0.00012500 | 3,81E-01  |
| 205.470.937.500.000 | 0.89296 | 0.89245 | 10.004  | 0.99994 | -4,60E-01   | -0.00010100 | 20547 | 0.96909 | 0.96890 | 0.99948 | 0.99929 | -9,44E-02   | 1,08E-01  |
| 205.497.988.281.250 | 0.89241 | 0.89201 | 10.004  | 0.99997 | -0.00029100 | -6,48E-01   | 20550 | 0.96892 | 0.96881 | 0.99943 | 0.99932 | -6,82E-01   | 4,09E-02  |
| 205.525.058.593.750 | 0.89138 | 0.89156 | 0.99982 | 10.000  | -0.00039700 | -1,34E-01   | 20553 | 0.96872 | 0.96871 | 0.99935 | 0.99934 | 1,27E-01    | -3,29E-02 |
| 205.552.109.375.000 | 0.89027 | 0.89112 | 0.99918 | 10.000  | -0.00036400 | 2,74E-01    | 20555 | 0.96899 | 0.96862 | 0.99974 | 0.99937 | -8,60E-01   | -1,67E-01 |
| 205.579.179.687.500 | 0.88941 | 0.89068 | 0.99880 | 10.001  | -0.00024900 | 4,66E-01    | 20558 | 0.96825 | 0.96853 | 0.99912 | 0.99940 | -7,76E-01   | 9,18E-02  |
| 205.606.269.531.250 | 0.88892 | 0.89023 | 0.99878 | 10.001  | -0.00011100 | 4,57E-01    | 20561 | 0.96857 | 0.96843 | 0.99956 | 0.99942 | -3,63E-01   | -9,53E-02 |
| 205.633.359.375.000 | 0.88881 | 0.88979 | 0.99915 | 10.001  | -8,42E-03   | 3,64E-01    | 20563 | 0.96805 | 0.96834 | 0.99917 | 0.99945 | -0.00012900 | -8,76E-02 |
| 205.660.449.218.750 | 0.88892 | 0.88935 | 0.99973 | 10.002  | 8,57E-01    | 2,72E-01    | 20566 | 0.96787 | 0.96825 | 0.99910 | 0.99948 | -8,37E-01   | 2,25E-01  |
| 205.687.539.062.500 | 0.88927 | 0.88891 | 10.006  | 10.002  | 0.00014700  | 2,68E-01    | 20569 | 0.96760 | 0.96816 | 0.99895 | 0.99951 | -7,33E-02   | 1,59E-01  |
| 205.714.648.437.500 | 0.88971 | 0.88847 | 10.015  | 10.002  | 0.00023100  | 4,67E-01    | 20571 | 0.96783 | 0.96807 | 0.99929 | 0.99954 | 2,32E-02    | -3,52E-02 |
| 205.742.890.625.000 | 0.89055 | 0.88801 | 10.028  | 10.003  | 0.00040500  | 6,81E-01    | 20574 | 0.96761 | 0.96798 | 0.99920 | 0.99957 | -2,68E-01   | -4,57E-02 |
| 205.770.019.531.250 | 0.89195 | 0.88757 | 10.047  | 10.003  | 0.00060800  | 6,26E-01    | 20577 | 0.96768 | 0.96789 | 0.99939 | 0.99960 | -2,30E-01   | -9,22E-03 |
| 205.797.148.437.500 | 0.89385 | 0.88713 | 10.070  | 10.003  | 0.00074500  | 2,36E-01    | 20580 | 0.96749 | 0.96780 | 0.99931 | 0.99963 | -3,18E-01   | -8,16E-02 |
| 205.825.429.687.500 | 0.89608 | 0.88667 | 10.098  | 10.004  | 0.00073900  | -3,90E-01   | 20583 | 0.96750 | 0.96771 | 0.99945 | 0.99966 | -6,82E-01   | -1,48E-01 |
| 205.852.558.593.750 | 0.89795 | 0.88623 | 10.121  | 10.004  | 0.00052900  | -0.00010200 | 20585 | 0.96711 | 0.96763 | 0.99917 | 0.99969 | -0.00011400 | -4,02E-02 |
| 205.880.839.843.750 | 0.89901 | 0.88578 | 10.137  | 10.004  | 0.00017300  | -0.00014300 | 20588 | 0.96687 | 0.96754 | 0.99905 | 0.99972 | -9,04E-01   | 1,53E-01  |
| 205.908.007.812.500 | 0.89891 | 0.88534 | 10.140  | 10.005  | -0.00026500 | -0.00014300 | 20591 | 0.96661 | 0.96745 | 0.99891 | 0.99975 | -2,91E-01   | 2,49E-01  |
| 205.936.308.593.750 | 0.89754 | 0.88488 | 10.131  | 10.005  | -0.00062100 | -1,00E+00   | 20594 | 0.96671 | 0.96736 | 0.99913 | 0.99978 | 4,75E-01    | 1,61E-01  |
| 205.964.609.375.000 | 0.89539 | 0.88443 | 10.115  | 10.005  | -0.00083200 | -6,00E-01   | 20596 | 0.96688 | 0.96727 | 0.99942 | 0.99981 | 6,20E-01    | -1,32E-01 |
| 205.991.796.875.000 | 0.89292 | 0.88399 | 10.095  | 10.005  | -0.00095400 | -3,48E-01   | 20599 | 0.96705 | 0.96719 | 0.99971 | 0.99984 | -2,59E-01   | -1,96E-01 |
| 206.020.117.187.500 | 0.89010 | 0.88354 | 10.071  | 10.006  | -0.0010300  | -2,60E-01   | 20602 | 0.96674 | 0.96710 | 0.99951 | 0.99987 | -4,68E-01   | 3,82E-02  |
| 206.048.437.500.000 | 0.88711 | 0.88308 | 10.046  | 10.006  | -0.0011000  | -1,85E-01   | 20605 | 0.96679 | 0.96701 | 0.99968 | 0.99990 | -4,22E-02   | 6,27E-02  |
| 206.076.777.343.750 | 0.88386 | 0.88263 | 10.019  | 10.006  | -0.0011300  | 1,44E-01    | 20608 | 0.96671 | 0.96692 | 0.99972 | 0.99993 | -1,13E-01   | -1,14E-01 |
| 206.105.136.718.750 | 0.88070 | 0.88217 | 0.99920 | 10.007  | -0.0010200  | 6,27E-01    | 20611 | 0.96673 | 0.96683 | 0.99986 | 0.99996 | -6,91E-01   | -9,14E-02 |
| 206.133.476.562.500 | 0.87809 | 0.88172 | 0.99707 | 10.007  | -0.00077500 | 9,63E-01    | 20613 | 0.96632 | 0.96674 | 0.99957 | 0.99999 | -6,31E-01   | 1,55E-01  |
| 206.161.835.937.500 | 0.87631 | 0.88127 | 0.99578 | 10.007  | -0.00047300 | 9,60E-01    | 20616 | 0.96637 | 0.96665 | 0.99974 | 10.000  | 1,90E-01    | 1,53E-01  |
| 206.190.214.843.750 | 0.87540 | 0.88081 | 0.99535 | 10.008  | -0.00023000 | 6,17E-01    | 20619 | 0.96643 | 0.96656 | 0.99991 | 10.000  | 2,35E-01    | 2,21E-02  |
| 206.218.593.750.000 | 0.87501 | 0.88036 | 0.99544 | 10.008  | -0.00012300 | 1,88E-01    | 20622 | 0.96650 | 0.96647 | 10.001  | 10.001  | 3,15E-01    | -2,70E-02 |
| 206.246.972.656.250 | 0.87470 | 0.87991 | 0.99562 | 10.008  | -0.00012300 | -1,16E-01   | 20625 | 0.96661 | 0.96638 | 10.003  | 10.001  | 8,16E-02    | 5,86E-02  |
| 206.276.503.906.250 | 0.87429 | 0.87944 | 0.99570 | 10.009  | -0.00019000 | -3,05E-01   | 20628 | 0.96655 | 0.96628 | 10.004  | 10.001  | 6,55E-01    | 8,20E-02  |
| 206.304.902.343.750 | 0.87360 | 0.87899 | 0.99550 | 10.009  | -0.00030000 | -3,69E-01   | 20630 | 0.96699 | 0.96619 | 10.009  | 10.001  | 5,57E-01    | -2,39E-01 |
| 206.333.320.312.500 | 0.87259 | 0.87854 | 0.99496 | 10.009  | -0.00039900 | -2,70E-01   | 20633 | 0.96686 | 0.96610 | 10.009  | 10.002  | -7,03E-01   | -2,60E-01 |
| 206.362.871.093.750 | 0.87129 | 0.87807 | 0.99416 | 10.009  | -0.00045700 | -7,79E-02   | 20636 | 0.96658 | 0.96600 | 10.008  | 10.002  | -9,48E-01   | -1,19E-02 |

|                     |         |         |         |        |             |           |       |         |         |        |        |             |           |
|---------------------|---------|---------|---------|--------|-------------|-----------|-------|---------|---------|--------|--------|-------------|-----------|
| 206.391.289.062.500 | 0.86994 | 0.87762 | 0.99329 | 10.010 | -0.00044500 | 2,32E-01  | 20639 | 0.96631 | 0.96591 | 10.006 | 10.002 | -7,73E-01   | 1,14E-01  |
| 206.420.859.375.000 | 0.86871 | 0.87715 | 0.99256 | 10.010 | -0.00032300 | 6,45E-01  | 20642 | 0.96613 | 0.96581 | 10.006 | 10.002 | -2,85E-01   | 1,51E-01  |
| 206.449.316.406.250 | 0.86807 | 0.87670 | 0.99239 | 10.010 | -7,02E-01   | 8,82E-01  | 20645 | 0.96615 | 0.96572 | 10.007 | 10.003 | 1,04E-01    | -1,99E-02 |
| 206.478.906.250.000 | 0.86830 | 0.87623 | 0.99312 | 10.010 | 0.00019000  | 7,30E-01  | 20648 | 0.96619 | 0.96562 | 10.009 | 10.003 | -4,00E-01   | -9,27E-02 |
| 206.508.496.093.750 | 0.86919 | 0.87576 | 0.99450 | 10.011 | 0.00036200  | 3,76E-01  | 20651 | 0.96591 | 0.96552 | 10.007 | 10.003 | -4,45E-01   | -7,78E-02 |
| 206.536.953.125.000 | 0.87040 | 0.87531 | 0.99620 | 10.011 | 0.00040800  | -2,96E-02 | 20654 | 0.96593 | 0.96543 | 10.008 | 10.003 | -8,52E-01   | -7,40E-02 |
| 206.566.582.031.250 | 0.87156 | 0.87484 | 0.99785 | 10.011 | 0.00034500  | -2,57E-01 | 20657 | 0.96542 | 0.96533 | 10.004 | 10.003 | -8,75E-01   | 2,84E-02  |
| 206.596.191.406.250 | 0.87245 | 0.87437 | 0.99923 | 10.012 | 0.00025600  | -2,86E-01 | 20660 | 0.96541 | 0.96523 | 10.005 | 10.004 | -6,84E-01   | 1,91E-01  |
| 206.625.820.312.500 | 0.87307 | 0.87391 | 10.003  | 10.012 | 0.00017500  | -2,76E-01 | 20663 | 0.96501 | 0.96513 | 10.003 | 10.004 | 2,59E-01    | 2,39E-01  |
| 206.655.468.750.000 | 0.87349 | 0.87344 | 10.013  | 10.012 | 9,21E-01    | -2,90E-01 | 20666 | 0.96557 | 0.96503 | 10.009 | 10.004 | 7,30E-01    | -4,53E-02 |
| 206.685.117.187.500 | 0.87362 | 0.87297 | 10.019  | 10.012 | 3,58E-02    | -2,95E-01 | 20669 | 0.96545 | 0.96493 | 10.009 | 10.004 | -9,46E-03   | -1,58E-01 |
| 206.714.765.625.000 | 0.87351 | 0.87250 | 10.023  | 10.013 | -8,30E-01   | -2,64E-01 | 20671 | 0.96556 | 0.96483 | 10.012 | 10.004 | -2,04E-01   | -1,99E-01 |
| 206.744.433.593.750 | 0.87313 | 0.87204 | 10.024  | 10.013 | -0.00015300 | -1,32E-01 | 20674 | 0.96532 | 0.96473 | 10.010 | 10.004 | -0.00011900 | -2,71E-02 |
| 206.774.101.562.500 | 0.87260 | 0.87157 | 10.023  | 10.013 | -0.00016100 | 3,41E-02  | 20677 | 0.96486 | 0.96462 | 10.007 | 10.005 | -3,65E-01   | 1,66E-01  |
| 206.803.789.062.500 | 0.87217 | 0.87110 | 10.024  | 10.013 | -0.00013300 | 1,03E-01  | 20680 | 0.96511 | 0.96452 | 10.011 | 10.005 | -2,02E-01   | 7,08E-02  |
| 206.834.628.906.250 | 0.87180 | 0.87062 | 10.025  | 10.013 | -9,94E-01   | 1,34E-01  | 20683 | 0.96474 | 0.96442 | 10.008 | 10.005 | 6,39E-02    | 1,28E-01  |
| 206.864.316.406.250 | 0.87157 | 0.87015 | 10.028  | 10.014 | -5,16E-01   | 1,75E-01  | 20686 | 0.96515 | 0.96431 | 10.013 | 10.005 | 5,70E-01    | -2,41E-01 |
| 206.894.023.437.500 | 0.87149 | 0.86968 | 10.032  | 10.014 | 4,84E-02    | 1,60E-01  | 20689 | 0.96507 | 0.96421 | 10.014 | 10.005 | -0.00013700 | -2,72E-01 |
| 206.924.882.812.500 | 0.87160 | 0.86920 | 10.038  | 10.014 | 4,55E-01    | 1,39E-01  | 20692 | 0.96432 | 0.96411 | 10.007 | 10.005 | -0.00010800 | 2,79E-01  |
| 206.954.609.375.000 | 0.87177 | 0.86873 | 10.045  | 10.014 | 8,88E-01    | 1,45E-01  | 20695 | 0.96442 | 0.96400 | 10.009 | 10.005 | 3,18E-01    | 1,59E-01  |
| 206.985.488.281.250 | 0.87213 | 0.86824 | 10.053  | 10.014 | 0.00013400  | 1,04E-01  | 20699 | 0.96451 | 0.96390 | 10.011 | 10.005 | -1,13E-01   | -1,97E-01 |
| 207.015.234.375.000 | 0.87258 | 0.86778 | 10.063  | 10.015 | 0.00015200  | -2,06E-02 | 20702 | 0.96435 | 0.96379 | 10.011 | 10.005 | -8,77E-01   | -1,41E-01 |
| 207.046.132.812.500 | 0.87306 | 0.86729 | 10.072  | 10.015 | 0.00012100  | -1,67E-01 | 20705 | 0.96398 | 0.96369 | 10.008 | 10.006 | -9,69E-01   | 2,01E-01  |
| 207.077.031.250.000 | 0.87333 | 0.86681 | 10.080  | 10.015 | 4,88E-01    | -2,85E-01 | 20708 | 0.96375 | 0.96358 | 10.007 | 10.006 | 3,63E-01    | 2,19E-01  |
| 207.107.949.218.750 | 0.87336 | 0.86632 | 10.085  | 10.015 | -5,52E-01   | -4,21E-01 | 20711 | 0.96420 | 0.96347 | 10.013 | 10.006 | 3,88E-01    | -8,40E-02 |
| 207.137.734.375.000 | 0.87299 | 0.86585 | 10.087  | 10.015 | -0.00020600 | -5,15E-01 | 20714 | 0.96399 | 0.96337 | 10.012 | 10.006 | -1,47E-01   | -1,12E-01 |
| 207.168.671.875.000 | 0.87211 | 0.86537 | 10.083  | 10.015 | -0.00036800 | -4,15E-01 | 20717 | 0.96411 | 0.96326 | 10.014 | 10.006 | -2,90E-01   | -1,01E-01 |
| 207.199.609.375.000 | 0.87071 | 0.86488 | 10.074  | 10.015 | -0.00046300 | -1,34E-01 | 20720 | 0.96381 | 0.96315 | 10.012 | 10.006 | -7,71E-01   | -3,59E-02 |
| 207.230.566.406.250 | 0.86924 | 0.86439 | 10.064  | 10.016 | -0.00045100 | 1,06E-01  | 20723 | 0.96364 | 0.96304 | 10.012 | 10.006 | -5,12E-01   | 2,84E-02  |
| 207.261.523.437.500 | 0.86792 | 0.86391 | 10.056  | 10.016 | -0.00039700 | 1,23E-01  | 20726 | 0.96349 | 0.96294 | 10.012 | 10.006 | -5,96E-01   | -3,44E-02 |
| 207.292.500.000.000 | 0.86678 | 0.86342 | 10.049  | 10.016 | -0.00037500 | -5,97E-02 | 20729 | 0.96327 | 0.96283 | 10.010 | 10.006 | -7,26E-01   | -1,31E-02 |
| 207.323.476.562.500 | 0.86560 | 0.86294 | 10.043  | 10.016 | -0.00043400 | -2,80E-01 | 20732 | 0.96304 | 0.96272 | 10.009 | 10.006 | -6,77E-01   | 1,65E-01  |
| 207.354.472.656.250 | 0.86409 | 0.86245 | 10.032  | 10.016 | -0.00054800 | -2,70E-01 | 20735 | 0.96285 | 0.96261 | 10.009 | 10.006 | 2,96E-01    | -4,62E-02 |
| 207.386.621.093.750 | 0.86214 | 0.86194 | 10.018  | 10.016 | -0.00060400 | -2,48E-03 | 20739 | 0.96323 | 0.96250 | 10.014 | 10.006 | -9,69E-01   | -3,86E-01 |
| 207.417.617.187.500 | 0.86027 | 0.86146 | 10.004  | 10.016 | -0.00055000 | 2,99E-01  | 20742 | 0.96224 | 0.96239 | 10.005 | 10.006 | -0.00021400 | 2,74E-02  |

|                     |         |         |         |        |             |           |       |         |         |         |        |             |           |
|---------------------|---------|---------|---------|--------|-------------|-----------|-------|---------|---------|---------|--------|-------------|-----------|
| 207.448.632.812.500 | 0.85873 | 0.86097 | 0.99939 | 10.016 | -0.00041900 | 4,11E-01  | 20745 | 0.96190 | 0.96229 | 10.002  | 10.006 | -7,99E-01   | 2,48E-01  |
| 207.480.820.312.500 | 0.85763 | 0.86047 | 0.99879 | 10.016 | -0.00029000 | 3,41E-01  | 20748 | 0.96173 | 0.96217 | 10.002  | 10.006 | -5,74E-01   | -2,95E-02 |
| 207.511.855.468.750 | 0.85690 | 0.85998 | 0.99856 | 10.016 | -0.00020300 | 1,25E-01  | 20751 | 0.96154 | 0.96207 | 10.001  | 10.006 | -9,85E-01   | -9,55E-02 |
| 207.542.910.156.250 | 0.85636 | 0.85949 | 0.99851 | 10.016 | -0.00021200 | -1,38E-01 | 20754 | 0.96112 | 0.96196 | 0.99980 | 10.006 | -0.00011700 | 5,67E-02  |
| 207.575.117.187.500 | 0.85556 | 0.85899 | 0.99822 | 10.016 | -0.00029100 | -3,10E-01 | 20758 | 0.96080 | 0.96185 | 0.99960 | 10.006 | -6,27E-01   | 4,68E-02  |
| 207.606.171.875.000 | 0.85452 | 0.85850 | 0.99767 | 10.016 | -0.00040800 | -3,44E-01 | 20761 | 0.96072 | 0.96174 | 0.99963 | 10.006 | -8,71E-01   | -6,00E-02 |
| 207.638.398.437.500 | 0.85298 | 0.85800 | 0.99663 | 10.017 | -0.00050900 | -1,52E-01 | 20764 | 0.96025 | 0.96163 | 0.99927 | 10.006 | -0.00010100 | 4,77E-02  |
| 207.670.644.531.250 | 0.85124 | 0.85749 | 0.99540 | 10.017 | -0.00050600 | 1,89E-01  | 20767 | 0.96007 | 0.96152 | 0.99920 | 10.006 | -5,63E-01   | 8,49E-02  |
| 207.701.738.281.250 | 0.84977 | 0.85701 | 0.99442 | 10.017 | -0.00038900 | 4,01E-01  | 20770 | 0.95989 | 0.96141 | 0.99913 | 10.006 | -4,69E-01   | 1,55E-03  |
| 207.733.984.375.000 | 0.84878 | 0.85650 | 0.99393 | 10.017 | -0.00025200 | 3,72E-01  | 20773 | 0.95978 | 0.96130 | 0.99913 | 10.007 | -5,54E-01   | -4,14E-02 |
| 207.766.250.000.000 | 0.84814 | 0.85600 | 0.99380 | 10.017 | -0.00014900 | 3,34E-01  | 20777 | 0.95954 | 0.96119 | 0.99900 | 10.007 | -7,36E-01   | -1,45E-02 |
| 207.798.535.156.250 | 0.84782 | 0.85549 | 0.99398 | 10.017 | -3,70E-01   | 3,58E-01  | 20780 | 0.95930 | 0.96108 | 0.99887 | 10.007 | -6,47E-01   | 1,82E-02  |
| 207.830.820.312.500 | 0.84791 | 0.85499 | 0.99457 | 10.017 | 8,24E-01    | 3,96E-01  | 20783 | 0.95912 | 0.96097 | 0.99880 | 10.007 | -6,19E-01   | 9,44E-02  |
| 207.863.125.000.000 | 0.84835 | 0.85448 | 0.99552 | 10.017 | 0.00021900  | 4,25E-01  | 20786 | 0.95890 | 0.96086 | 0.99869 | 10.007 | -3,73E-02   | 1,40E-02  |
| 207.895.429.687.500 | 0.84932 | 0.85398 | 0.99699 | 10.016 | 0.00035700  | 3,14E-01  | 20790 | 0.95909 | 0.96075 | 0.99899 | 10.007 | -5,28E-01   | -1,04E-01 |
| 207.927.753.906.250 | 0.85066 | 0.85348 | 0.99883 | 10.016 | 0.00042200  | 9,43E-02  | 20793 | 0.95856 | 0.96065 | 0.99857 | 10.007 | -7,09E-01   | 2,28E-01  |
| 207.960.078.125.000 | 0.85205 | 0.85297 | 10.007  | 10.016 | 0.00041800  | -1,05E-01 | 20796 | 0.95864 | 0.96054 | 0.99875 | 10.007 | 9,46E-01    | 2,08E-01  |
| 207.992.421.875.000 | 0.85336 | 0.85247 | 10.025  | 10.016 | 0.00035400  | -3,15E-01 | 20799 | 0.95917 | 0.96043 | 0.99940 | 10.007 | 6,38E-01    | -2,48E-01 |
| 208.024.765.625.000 | 0.85434 | 0.85197 | 10.040  | 10.016 | 0.00021400  | -4,79E-01 | 20802 | 0.95905 | 0.96032 | 0.99938 | 10.007 | -6,55E-01   | -1,46E-01 |
| 208.058.281.250.000 | 0.85477 | 0.85144 | 10.050  | 10.016 | 3,85E-01    | -5,38E-01 | 20806 | 0.95874 | 0.96021 | 0.99919 | 10.007 | -3,25E-01   | -1,67E-02 |
| 208.090.644.531.250 | 0.85459 | 0.85094 | 10.053  | 10.016 | -0.00014000 | -4,67E-01 | 20809 | 0.95883 | 0.96011 | 0.99939 | 10.007 | -7,66E-01   | 1,54E-01  |
| 208.123.027.343.750 | 0.85386 | 0.85044 | 10.050  | 10.016 | -0.00026400 | -2,37E-01 | 20812 | 0.95825 | 0.96000 | 0.99890 | 10.007 | 6,74E-01    | 4,32E-01  |
| 208.156.562.500.000 | 0.85285 | 0.84992 | 10.045  | 10.016 | -0.00029700 | -5,73E-03 | 20816 | 0.95928 | 0.95989 | 10.000  | 10.007 | 0.00020800  | -1,13E-01 |
| 208.188.964.843.750 | 0.85190 | 0.84942 | 10.041  | 10.016 | -0.00026800 | 1,38E-01  | 20819 | 0.95962 | 0.95978 | 10.005  | 10.007 | -7,29E-02   | -1,98E-01 |
| 208.222.539.062.500 | 0.85109 | 0.84889 | 10.038  | 10.016 | -0.00020600 | 2,17E-01  | 20822 | 0.95923 | 0.95968 | 10.002  | 10.007 | 7,74E-01    | 1,08E-01  |
| 208.254.960.937.500 | 0.85055 | 0.84839 | 10.037  | 10.016 | -0.00012500 | 2,69E-01  | 20825 | 0.96013 | 0.95957 | 10.012  | 10.007 | 6,41E-01    | -1,40E-01 |
| 208.288.554.687.500 | 0.85026 | 0.84787 | 10.040  | 10.016 | -2,81E-01   | 2,54E-01  | 20829 | 0.95965 | 0.95946 | 10.008  | 10.007 | -1,53E-01   | 9,09E-03  |
| 208.322.148.437.500 | 0.85036 | 0.84735 | 10.046  | 10.016 | 4,60E-01    | 1,12E-01  | 20832 | 0.96003 | 0.95936 | 10.013  | 10.007 | 7,02E-01    | -1,69E-02 |
| 208.354.609.375.000 | 0.85056 | 0.84685 | 10.053  | 10.015 | 4,57E-01    | -8,79E-02 | 20835 | 0.96012 | 0.95925 | 10.015  | 10.007 | -2,65E-01   | -7,14E-02 |
| 208.388.222.656.250 | 0.85066 | 0.84633 | 10.059  | 10.015 | -1,22E-01   | -2,18E-01 | 20839 | 0.95985 | 0.95915 | 10.014  | 10.007 | 2,30E-01    | 9,76E-02  |
| 208.421.855.468.750 | 0.85048 | 0.84582 | 10.062  | 10.015 | -0.00010100 | -2,83E-01 | 20842 | 0.96027 | 0.95904 | 10.019  | 10.007 | 3,92E-01    | -1,33E-01 |
| 208.455.507.812.500 | 0.84998 | 0.84530 | 10.062  | 10.015 | -0.00020200 | -2,67E-01 | 20846 | 0.96011 | 0.95894 | 10.018  | 10.007 | -6,62E-01   | -2,80E-01 |
| 208.489.160.156.250 | 0.84912 | 0.84478 | 10.058  | 10.015 | -0.00028100 | -1,67E-01 | 20849 | 0.95983 | 0.95883 | 10.017  | 10.007 | -0.00014900 | -1,72E-01 |
| 208.522.812.500.000 | 0.84809 | 0.84426 | 10.053  | 10.015 | -0.00031500 | -1,86E-02 | 20852 | 0.95911 | 0.95873 | 10.010  | 10.007 | -0.00018200 | 7,46E-01  |
| 208.556.503.906.250 | 0.84700 | 0.84375 | 10.047  | 10.015 | -0.00029300 | 6,84E-02  | 20856 | 0.95860 | 0.95862 | 10.006  | 10.007 | 0.00035300  | 6,47E-01  |

|                     |         |         |         |        |             |           |       |         |         |         |        |             |           |
|---------------------|---------|---------|---------|--------|-------------|-----------|-------|---------|---------|---------|--------|-------------|-----------|
| 208.590.175.781.250 | 0.84611 | 0.84323 | 10.043  | 10.015 | -0.00026900 | -3,00E-02 | 20859 | 0.96149 | 0.95852 | 10.036  | 10.007 | 0.00025400  | -9,94E-01 |
| 208.623.886.718.750 | 0.84519 | 0.84271 | 10.039  | 10.014 | -0.00031300 | -1,57E-01 | 20862 | 0.96031 | 0.95841 | 10.026  | 10.007 | -0.00031600 | -4,56E-01 |
| 208.657.597.656.250 | 0.84400 | 0.84220 | 10.032  | 10.014 | -0.00037400 | -1,46E-01 | 20866 | 0.95936 | 0.95831 | 10.017  | 10.007 | -5,37E-01   | 4,49E-01  |
| 208.691.308.593.750 | 0.84266 | 0.84168 | 10.024  | 10.014 | -0.00041200 | -5,32E-02 | 20869 | 0.95995 | 0.95821 | 10.024  | 10.007 | -1,37E-01   | 3,06E-02  |
| 208.726.210.937.500 | 0.84118 | 0.84115 | 10.014  | 10.014 | -0.00041100 | 3,58E-02  | 20873 | 0.95927 | 0.95810 | 10.018  | 10.007 | -3,27E-01   | 1,50E-02  |
| 208.759.960.937.500 | 0.83984 | 0.84064 | 10.006  | 10.014 | -0.00038700 | 7,52E-02  | 20876 | 0.95972 | 0.95800 | 10.024  | 10.007 | -3,38E-02   | -5,84E-02 |
| 208.793.710.937.500 | 0.83856 | 0.84012 | 0.99981 | 10.014 | -0.00036000 | 9,45E-02  | 20879 | 0.95924 | 0.95790 | 10.020  | 10.007 | -7,21E-01   | 3,43E-03  |
| 208.828.632.812.500 | 0.83737 | 0.83959 | 0.99912 | 10.013 | -0.00032200 | 8,18E-02  | 20883 | 0.95923 | 0.95779 | 10.021  | 10.007 | -1,02E-02   | -1,04E-02 |
| 208.862.421.875.000 | 0.83635 | 0.83908 | 0.99860 | 10.013 | -0.00030400 | 2,14E-02  | 20886 | 0.95924 | 0.95769 | 10.022  | 10.007 | -7,93E-01   | -1,83E-01 |
| 208.897.363.281.250 | 0.83528 | 0.83855 | 0.99804 | 10.013 | -0.00030700 | -1,86E-02 | 20890 | 0.95868 | 0.95758 | 10.017  | 10.006 | -0.00012700 | -2,81E-02 |
| 208.931.171.875.000 | 0.83424 | 0.83804 | 0.99749 | 10.013 | -0.00031700 | 1,97E-02  | 20893 | 0.95837 | 0.95748 | 10.015  | 10.006 | -9,86E-01   | 5,07E-02  |
| 208.966.152.343.750 | 0.83310 | 0.83751 | 0.99687 | 10.013 | -0.00029400 | 1,21E-01  | 20897 | 0.95800 | 0.95738 | 10.013  | 10.006 | -9,17E-01   | 5,31E-02  |
| 209.001.132.812.500 | 0.83218 | 0.83698 | 0.99645 | 10.013 | -0.00023200 | 2,14E-01  | 20900 | 0.95772 | 0.95727 | 10.011  | 10.006 | -6,14E-01   | 1,72E-01  |
| 209.034.960.937.500 | 0.83151 | 0.83647 | 0.99627 | 10.012 | -0.00014700 | 2,87E-01  | 20903 | 0.95758 | 0.95717 | 10.010  | 10.006 | 2,69E-01    | 4,70E-02  |
| 209.069.980.468.750 | 0.83117 | 0.83595 | 0.99644 | 10.012 | -3,49E-01   | 2,93E-01  | 20907 | 0.95791 | 0.95707 | 10.015  | 10.006 | -2,91E-01   | -1,83E-01 |
| 209.105.000.000.000 | 0.83126 | 0.83542 | 0.99704 | 10.012 | 5,81E-01    | 1,92E-01  | 20910 | 0.95738 | 0.95696 | 10.010  | 10.006 | -0.00010100 | 1,66E-02  |
| 209.140.039.062.500 | 0.83157 | 0.83489 | 0.99786 | 10.012 | 9,96E-01    | 4,96E-02  | 20914 | 0.95720 | 0.95686 | 10.010  | 10.006 | -1,75E-01   | 1,32E-01  |
| 209.175.078.125.000 | 0.83196 | 0.83437 | 0.99875 | 10.012 | 9,29E-01    | -3,51E-02 | 20918 | 0.95726 | 0.95675 | 10.011  | 10.006 | -8,86E-02   | -2,58E-02 |
| 209.210.136.718.750 | 0.83223 | 0.83385 | 0.99952 | 10.011 | 7,50E-01    | -3,42E-02 | 20921 | 0.95714 | 0.95665 | 10.011  | 10.006 | -3,55E-01   | -8,62E-02 |
| 209.245.214.843.750 | 0.83248 | 0.83332 | 10.003  | 10.011 | 6,89E-01    | -3,60E-02 | 20925 | 0.95701 | 0.95655 | 10.011  | 10.006 | -6,93E-01   | 2,25E-02  |
| 209.280.292.968.750 | 0.83271 | 0.83280 | 10.010  | 10.011 | 4,97E-01    | -9,56E-02 | 20928 | 0.95665 | 0.95644 | 10.008  | 10.006 | -1,97E-01   | -5,17E-04 |
| 209.315.390.625.000 | 0.83283 | 0.83228 | 10.016  | 10.011 | 1,79E-02    | -1,66E-01 | 20932 | 0.95687 | 0.95634 | 10.011  | 10.006 | -6,97E-01   | -1,92E-01 |
| 209.350.507.812.500 | 0.83272 | 0.83176 | 10.020  | 10.011 | -6,71E-01   | -1,89E-01 | 20935 | 0.95616 | 0.95624 | 10.005  | 10.006 | -0.00015400 | 1,05E-01  |
| 209.385.625.000.000 | 0.83236 | 0.83124 | 10.022  | 10.010 | -0.00013100 | -1,37E-01 | 20939 | 0.95578 | 0.95613 | 10.002  | 10.006 | 4,20E-02    | 1,87E-01  |
| 209.421.914.062.500 | 0.83179 | 0.83070 | 10.021  | 10.010 | -0.00016500 | -9,56E-02 | 20942 | 0.95619 | 0.95603 | 10.007  | 10.006 | -2,08E-01   | -8,84E-02 |
| 209.457.070.312.500 | 0.83118 | 0.83018 | 10.020  | 10.010 | -0.00019900 | -7,20E-02 | 20946 | 0.95564 | 0.95592 | 10.003  | 10.006 | -5,90E-01   | -5,25E-02 |
| 209.492.226.562.500 | 0.83039 | 0.82966 | 10.017  | 10.010 | -0.00021600 | 3,70E-03  | 20949 | 0.95578 | 0.95582 | 10.005  | 10.006 | -5,76E-01   | -3,22E-02 |
| 209.528.554.687.500 | 0.82964 | 0.82913 | 10.015  | 10.009 | -0.00019600 | 5,74E-02  | 20953 | 0.95522 | 0.95571 | 10.001  | 10.005 | -8,20E-01   | -1,00E-02 |
| 209.563.750.000.000 | 0.82898 | 0.82861 | 10.013  | 10.009 | -0.00017500 | 6,02E-02  | 20956 | 0.95519 | 0.95561 | 10.001  | 10.005 | -6,48E-01   | 7,58E-02  |
| 209.598.925.781.250 | 0.82841 | 0.82810 | 10.012  | 10.009 | -0.00015400 | 7,23E-02  | 20960 | 0.95477 | 0.95551 | 0.99978 | 10.005 | -2,87E-01   | 5,87E-02  |
| 209.635.312.500.000 | 0.82788 | 0.82757 | 10.012  | 10.009 | -0.00012300 | 9,94E-02  | 20964 | 0.95499 | 0.95540 | 10.001  | 10.005 | -2,28E-01   | -4,97E-02 |
| 209.671.699.218.750 | 0.82752 | 0.82704 | 10.013  | 10.009 | -8,18E-01   | 1,35E-01  | 20967 | 0.95460 | 0.95529 | 0.99981 | 10.005 | -6,49E-01   | -1,19E-02 |
| 209.706.933.593.750 | 0.82729 | 0.82652 | 10.016  | 10.008 | -2,65E-01   | 1,59E-01  | 20971 | 0.95452 | 0.95519 | 0.99982 | 10.005 | -3,13E-01   | 1,17E-02  |
| 209.743.339.843.750 | 0.82733 | 0.82600 | 10.021  | 10.008 | 3,23E-01    | 8,09E-02  | 20974 | 0.95438 | 0.95508 | 0.99977 | 10.005 | -5,65E-01   | -6,70E-03 |
| 209.779.765.625.000 | 0.82753 | 0.82547 | 10.028  | 10.008 | 3,24E-01    | -7,65E-02 | 20978 | 0.95411 | 0.95497 | 0.99959 | 10.005 | -3,62E-01   | 2,51E-02  |

|                     |         |         |         |         |             |           |       |         |         |         |         |             |           |
|---------------------|---------|---------|---------|---------|-------------|-----------|-------|---------|---------|---------|---------|-------------|-----------|
| 209.815.039.062.500 | 0.82756 | 0.82496 | 10.034  | 10.008  | -2,25E-01   | -1,83E-01 | 20982 | 0.95412 | 0.95487 | 0.99969 | 10.004  | -3,85E-01   | 7,89E-02  |
| 209.851.484.375.000 | 0.82737 | 0.82443 | 10.037  | 10.007  | -9,87E-01   | -2,00E-01 | 20985 | 0.95383 | 0.95476 | 0.99950 | 10.004  | 2,04E-01    | 3,72E-02  |
| 209.887.949.218.750 | 0.82684 | 0.82391 | 10.037  | 10.007  | -0.00016800 | -1,39E-01 | 20989 | 0.95427 | 0.95465 | 10.000  | 10.004  | -1,14E-01   | -8,07E-02 |
| 209.924.433.593.750 | 0.82614 | 0.82339 | 10.035  | 10.007  | -0.00020000 | -7,04E-02 | 20992 | 0.95375 | 0.95454 | 0.99960 | 10.004  | -3,85E-01   | 6,79E-02  |
| 209.960.917.968.750 | 0.82538 | 0.82286 | 10.032  | 10.007  | -0.00022000 | -3,33E-02 | 20996 | 0.95399 | 0.95444 | 0.99992 | 10.004  | 3,82E-01    | 2,45E-02  |
| 209.997.421.875.000 | 0.82453 | 0.82234 | 10.028  | 10.007  | -0.00022400 | 1,54E-02  | 21000 | 0.95403 | 0.95433 | 10.001  | 10.004  | -2,06E-01   | -1,69E-01 |
| 210.033.945.312.500 | 0.82374 | 0.82182 | 10.026  | 10.006  | -0.00020900 | 1,91E-02  | 21003 | 0.95384 | 0.95422 | 0.99995 | 10.003  | -8,53E-01   | -1,81E-01 |
| 210.070.468.750.000 | 0.82301 | 0.82130 | 10.023  | 10.006  | -0.00021100 | -2,75E-02 | 21007 | 0.95341 | 0.95411 | 0.99961 | 10.003  | -0.00015200 | 9,25E-02  |
| 210.107.011.718.750 | 0.82220 | 0.82078 | 10.020  | 10.006  | -0.00022900 | -5,74E-02 | 21011 | 0.95272 | 0.95400 | 0.99901 | 10.003  | -1,77E-01   | 2,91E-01  |
| 210.144.746.093.750 | 0.82131 | 0.82024 | 10.016  | 10.006  | -0.00025300 | -7,35E-02 | 21014 | 0.95327 | 0.95389 | 0.99966 | 10.003  | 6,38E-01    | -2,88E-02 |
| 210.181.328.125.000 | 0.82032 | 0.81972 | 10.011  | 10.005  | -0.00028300 | -3,24E-02 | 21018 | 0.95320 | 0.95378 | 0.99966 | 10.002  | -3,91E-01   | -1,83E-01 |
| 210.217.910.156.250 | 0.81924 | 0.81921 | 10.005  | 10.005  | -0.00027700 | 2,70E-02  | 21022 | 0.95299 | 0.95367 | 0.99954 | 10.002  | -6,99E-01   | 3,58E-02  |
| 210.254.492.187.500 | 0.81830 | 0.81869 | 10.001  | 10.005  | -0.00026300 | 5,88E-03  | 21025 | 0.95268 | 0.95355 | 0.99932 | 10.002  | -1,29E-01   | 1,16E-01  |
| 210.292.285.156.250 | 0.81728 | 0.81816 | 0.99958 | 10.005  | -0.00027300 | -1,44E-02 | 21029 | 0.95289 | 0.95344 | 0.99962 | 10.002  | 1,60E-01    | 4,15E-02  |
| 210.328.906.250.000 | 0.81627 | 0.81764 | 0.99906 | 10.004  | -0.00027400 | 2,05E-02  | 21033 | 0.95280 | 0.95333 | 0.99962 | 10.001  | 1,79E-01    | -5,72E-02 |
| 210.366.718.750.000 | 0.81524 | 0.81711 | 0.99853 | 10.004  | -0.00025700 | 6,79E-02  | 21037 | 0.95303 | 0.95321 | 0.99992 | 10.001  | -2,65E-01   | -9,13E-02 |
| 210.403.378.906.250 | 0.81435 | 0.81660 | 0.99813 | 10.004  | -0.00022400 | 8,18E-02  | 21040 | 0.95261 | 0.95310 | 0.99959 | 10.001  | -5,01E-01   | 7,20E-02  |
| 210.441.210.937.500 | 0.81358 | 0.81607 | 0.99786 | 10.003  | -0.00019600 | 6,83E-02  | 21044 | 0.95265 | 0.95299 | 0.99972 | 10.001  | 2,71E-01    | 9,73E-02  |
| 210.477.890.625.000 | 0.81289 | 0.81555 | 0.99766 | 10.003  | -0.00017300 | 8,43E-02  | 21048 | 0.95281 | 0.95288 | 0.99996 | 10.000  | 2,24E-01    | 1,72E-03  |
| 210.515.761.718.750 | 0.81229 | 0.81502 | 0.99756 | 10.003  | -0.00013400 | 9,49E-02  | 21052 | 0.95282 | 0.95276 | 10.001  | 100.000 | 2,83E-01    | -1,37E-02 |
| 210.553.652.343.750 | 0.81188 | 0.81449 | 0.99765 | 10.003  | -0.00010100 | 7,45E-02  | 21055 | 0.95302 | 0.95265 | 10.003  | 0.99997 | 1,21E-01    | -1,53E-01 |
| 210.591.542.968.750 | 0.81153 | 0.81397 | 0.99779 | 10.002  | -7,70E-01   | 7,77E-02  | 21059 | 0.95291 | 0.95254 | 10.003  | 0.99994 | -8,73E-01   | -1,02E-01 |
| 210.628.261.718.750 | 0.81130 | 0.81346 | 0.99805 | 10.002  | -4,28E-01   | 5,63E-02  | 21063 | 0.95237 | 0.95243 | 0.99985 | 0.99991 | -6,43E-01   | 1,32E-01  |
| 210.666.191.406.250 | 0.81121 | 0.81293 | 0.99845 | 10.002  | -3,50E-01   | 1,89E-02  | 21067 | 0.95243 | 0.95231 | 0.99999 | 0.99988 | 1,13E-01    | 5,87E-02  |
| 210.704.140.625.000 | 0.81104 | 0.81240 | 0.99878 | 10.001  | -2,85E-01   | 3,44E-02  | 21070 | 0.95246 | 0.95220 | 10.001  | 0.99985 | -1,98E-01   | 7,98E-03  |
| 210.742.089.843.750 | 0.81099 | 0.81188 | 0.99922 | 10.001  | -8,91E-02   | 2,87E-02  | 21074 | 0.95228 | 0.95209 | 10.000  | 0.99982 | 1,74E-01    | 2,51E-02  |
| 210.780.058.593.750 | 0.81097 | 0.81135 | 0.99969 | 10.001  | -6,73E-02   | 2,12E-03  | 21078 | 0.95259 | 0.95198 | 10.004  | 0.99979 | -6,81E-03   | -1,38E-01 |
| 210.818.027.343.750 | 0.81094 | 0.81082 | 10.002  | 10.000  | -7,29E-02   | -3,01E-02 | 21082 | 0.95228 | 0.95188 | 10.002  | 0.99976 | -8,71E-01   | -4,93E-03 |
| 210.856.015.625.000 | 0.81091 | 0.81030 | 10.006  | 10.000  | -2,96E-01   | -8,82E-02 | 21086 | 0.95193 | 0.95177 | 0.99989 | 0.99973 | -4,43E-02   | 1,14E-01  |
| 210.894.023.437.500 | 0.81071 | 0.80977 | 10.009  | 0.99997 | -7,43E-01   | -9,58E-02 | 21089 | 0.95224 | 0.95167 | 10.003  | 0.99971 | -4,08E-03   | -1,03E-01 |
| 210.933.242.187.500 | 0.81034 | 0.80923 | 10.010  | 0.99993 | -0.00010400 | -8,35E-02 | 21093 | 0.95192 | 0.95156 | 10.000  | 0.99968 | -8,36E-01   | -4,30E-02 |
| 210.971.289.062.500 | 0.80991 | 0.80871 | 10.011  | 0.99989 | -0.00013900 | -8,55E-02 | 21097 | 0.95160 | 0.95146 | 0.99979 | 0.99965 | -3,36E-01   | 1,23E-01  |
| 211.009.335.937.500 | 0.80928 | 0.80818 | 10.010  | 0.99986 | -0.00016900 | -6,23E-02 | 21101 | 0.95167 | 0.95136 | 0.99994 | 0.99963 | 1,02E-01    | -2,28E-02 |
| 211.047.402.343.750 | 0.80863 | 0.80766 | 10.008  | 0.99982 | -0.00018600 | -4,33E-02 | 21105 | 0.95167 | 0.95126 | 10.000  | 0.99961 | -5,10E-01   | -3,81E-02 |
| 211.086.660.156.250 | 0.80784 | 0.80712 | 10.005  | 0.99978 | -0.00020200 | -1,22E-02 | 21109 | 0.95127 | 0.95116 | 0.99970 | 0.99959 | -1,92E-01   | 2,47E-02  |

|                     |         |         |         |         |             |           |       |         |         |         |         |             |           |
|---------------------|---------|---------|---------|---------|-------------|-----------|-------|---------|---------|---------|---------|-------------|-----------|
| 211.124.746.093.750 | 0.80707 | 0.80659 | 10.002  | 0.99974 | -0.00019600 | 2,84E-02  | 21112 | 0.95153 | 0.95107 | 10.000  | 0.99957 | -3,19E-01   | -4,60E-02 |
| 211.164.042.968.750 | 0.80633 | 0.80605 | 0.99997 | 0.99969 | -0.00018000 | 4,97E-02  | 21116 | 0.95103 | 0.95098 | 0.99960 | 0.99955 | -5,48E-01   | 1,13E-02  |
| 211.202.167.968.750 | 0.80567 | 0.80553 | 0.99979 | 0.99965 | -0.00015700 | 5,11E-02  | 21120 | 0.95110 | 0.95089 | 0.99975 | 0.99954 | -2,31E-01   | 9,63E-02  |
| 211.241.503.906.250 | 0.80511 | 0.80499 | 0.99972 | 0.99960 | -0.00014000 | 2,89E-02  | 21124 | 0.95085 | 0.95080 | 0.99957 | 0.99952 | 1,98E-01    | 5,39E-02  |
| 211.279.648.437.500 | 0.80459 | 0.80447 | 0.99968 | 0.99956 | -0.00013500 | 1,64E-02  | 21128 | 0.95125 | 0.95072 | 10.001  | 0.99951 | 1,86E-01    | -7,53E-02 |
| 211.319.003.906.250 | 0.80407 | 0.80393 | 0.99965 | 0.99951 | -0.00012800 | 1,45E-02  | 21132 | 0.95099 | 0.95063 | 0.99986 | 0.99950 | -3,85E-01   | -2,01E-02 |
| 211.357.187.500.000 | 0.80359 | 0.80340 | 0.99965 | 0.99946 | -0.00012400 | 4,64E-03  | 21136 | 0.95096 | 0.95056 | 0.99990 | 0.99949 | 3,06E-02    | 1,45E-02  |
| 211.396.562.500.000 | 0.80311 | 0.80286 | 0.99966 | 0.99941 | -0.00012400 | -1,14E-02 | 21140 | 0.95102 | 0.95048 | 10.000  | 0.99949 | -2,73E-01   | -1,63E-02 |
| 211.435.957.031.250 | 0.80262 | 0.80232 | 0.99965 | 0.99936 | -0.00013300 | -1,94E-02 | 21144 | 0.95074 | 0.95041 | 0.99982 | 0.99949 | -9,76E-02   | -4,88E-03 |
| 211.475.371.093.750 | 0.80206 | 0.80178 | 0.99959 | 0.99931 | -0.00013900 | -1,35E-02 | 21148 | 0.95094 | 0.95034 | 10.001  | 0.99949 | -3,11E-01   | -4,80E-02 |
| 211.514.804.687.500 | 0.80152 | 0.80124 | 0.99953 | 0.99925 | -0.00014300 | 5,72E-03  | 21151 | 0.95050 | 0.95027 | 0.99972 | 0.99949 | -4,76E-01   | 1,25E-01  |
| 211.554.257.812.500 | 0.80093 | 0.80070 | 0.99943 | 0.99920 | -0.00013500 | 2,45E-02  | 21155 | 0.95056 | 0.95021 | 0.99986 | 0.99950 | 6,78E-01    | 5,26E-02  |
| 211.593.710.937.500 | 0.80045 | 0.80016 | 0.99943 | 0.99914 | -0.00012400 | 4,87E-03  | 21159 | 0.95103 | 0.95015 | 10.004  | 0.99951 | -6,15E-02   | -2,12E-01 |
| 211.633.183.593.750 | 0.79996 | 0.79962 | 0.99942 | 0.99908 | -0.00013100 | -9,20E-03 | 21163 | 0.95051 | 0.95009 | 0.99995 | 0.99952 | -9,97E-01   | -9,20E-02 |
| 211.672.675.781.250 | 0.79942 | 0.79908 | 0.99936 | 0.99902 | -0.00013100 | -1,81E-03 | 21167 | 0.95024 | 0.95004 | 0.99974 | 0.99954 | -7,88E-01   | 1,28E-01  |
| 211.712.187.500.000 | 0.79892 | 0.79854 | 0.99934 | 0.99896 | -0.00013300 | -4,43E-03 | 21171 | 0.94989 | 0.95000 | 0.99946 | 0.99956 | 1,75E-02    | 1,10E-01  |
| 211.751.699.218.750 | 0.79837 | 0.79800 | 0.99927 | 0.99890 | -0.00013500 | -1,34E-02 | 21175 | 0.95026 | 0.94995 | 0.99989 | 0.99959 | 8,12E-02    | -9,39E-03 |
| 211.791.230.468.750 | 0.79786 | 0.79746 | 0.99923 | 0.99884 | -0.00014300 | -3,51E-02 | 21179 | 0.94996 | 0.94992 | 0.99965 | 0.99961 | -5,68E-02   | -1,77E-02 |
| 211.830.781.250.000 | 0.79724 | 0.79691 | 0.99909 | 0.99877 | -0.00016200 | -2,55E-02 | 21183 | 0.95021 | 0.94988 | 0.99997 | 0.99965 | -5,90E-02   | -2,37E-02 |
| 211.870.351.562.500 | 0.79657 | 0.79637 | 0.99890 | 0.99870 | -0.00016300 | -9,97E-03 | 21187 | 0.94991 | 0.94986 | 0.99973 | 0.99968 | -2,44E-01   | 3,90E-03  |
| 211.911.113.281.250 | 0.79592 | 0.79581 | 0.99874 | 0.99863 | -0.00017000 | -3,60E-02 | 21191 | 0.95002 | 0.94983 | 0.99991 | 0.99972 | -2,77E-02   | -1,40E-02 |
| 211.950.722.656.250 | 0.79520 | 0.79527 | 0.99849 | 0.99856 | -0.00019200 | -4,71E-02 | 21195 | 0.94989 | 0.94982 | 0.99984 | 0.99977 | -3,57E-01   | -5,65E-02 |
| 211.990.332.031.250 | 0.79440 | 0.79472 | 0.99817 | 0.99849 | -0.00020800 | -1,41E-02 | 21199 | 0.94973 | 0.94980 | 0.99975 | 0.99982 | -4,75E-01   | 2,04E-02  |
| 212.031.152.343.750 | 0.79353 | 0.79416 | 0.99778 | 0.99841 | -0.00020400 | 2,90E-02  | 21203 | 0.94951 | 0.94980 | 0.99958 | 0.99987 | -1,93E-01   | 5,75E-02  |
| 212.070.781.250.000 | 0.79276 | 0.79362 | 0.99748 | 0.99834 | -0.00018400 | 5,41E-02  | 21207 | 0.94958 | 0.94979 | 0.99972 | 0.99993 | -1,24E-02   | -2,45E-02 |
| 212.111.640.625.000 | 0.79205 | 0.79306 | 0.99725 | 0.99826 | -0.00016000 | 7,12E-02  | 21211 | 0.94950 | 0.94980 | 0.99970 | 100.000 | -3,90E-01   | -7,01E-02 |
| 212.152.519.531.250 | 0.79145 | 0.79249 | 0.99714 | 0.99818 | -0.00012600 | 7,41E-02  | 21215 | 0.94926 | 0.94981 | 0.99952 | 10.001  | -5,86E-01   | -1,69E-01 |
| 212.192.207.031.250 | 0.79103 | 0.79195 | 0.99718 | 0.99809 | -1,00E+00   | 4,02E-02  | 21219 | 0.94902 | 0.94982 | 0.99934 | 10.001  | -0.00017500 | -1,73E-01 |
| 212.233.105.468.750 | 0.79065 | 0.79138 | 0.99727 | 0.99801 | -9,38E-01   | -2,41E-03 | 21223 | 0.94785 | 0.94985 | 0.99823 | 10.002  | -0.00019800 | 1,88E-01  |
| 212.272.832.031.250 | 0.79027 | 0.79083 | 0.99736 | 0.99792 | -0.00010200 | -2,32E-02 | 21227 | 0.94743 | 0.94988 | 0.99787 | 10.003  | -2,33E-01   | 3,23E-01  |
| 212.313.750.000.000 | 0.78982 | 0.79027 | 0.99739 | 0.99783 | -0.00011300 | -1,75E-02 | 21231 | 0.94766 | 0.94991 | 0.99816 | 10.004  | 6,30E-01    | 7,33E-02  |
| 212.354.707.031.250 | 0.78935 | 0.78970 | 0.99739 | 0.99774 | -0.00011700 | -9,86E-03 | 21235 | 0.94794 | 0.94995 | 0.99850 | 10.005  | 3,67E-01    | -4,08E-02 |
| 212.395.683.593.750 | 0.78886 | 0.78913 | 0.99738 | 0.99765 | -0.00012100 | 4,79E-03  | 21240 | 0.94796 | 0.95000 | 0.99857 | 10.006  | 2,96E-01    | 5,78E-02  |
| 212.436.660.156.250 | 0.78836 | 0.78857 | 0.99735 | 0.99755 | -0.00011300 | 1,79E-02  | 21244 | 0.94819 | 0.95006 | 0.99885 | 10.007  | 8,41E-01    | 4,78E-02  |
| 212.477.656.250.000 | 0.78794 | 0.78800 | 0.99740 | 0.99745 | -0.00010600 | 1,36E-02  | 21248 | 0.94865 | 0.95013 | 0.99937 | 10.008  | 6,88E-01    | -9,79E-02 |

|                     |         |         |         |         |             |          |       |         |         |         |        |            |          |
|---------------------|---------|---------|---------|---------|-------------|----------|-------|---------|---------|---------|--------|------------|----------|
| 212.518.671.875.000 | 0.78750 | 0.78743 | 0.99742 | 0.99735 | -0.00010200 | 2,73E-02 | 21252 | 0.94875 | 0.95020 | 0.99953 | 10.010 | 3,79E-02   | 1,12E-01 |
| 212.559.707.031.250 | 0.78711 | 0.78685 | 0.99750 | 0.99725 | -8,35E-01   | 3,59E-02 | 21256 | 0.94868 | 0.95028 | 0.99951 | 10.011 | 0.00016100 | 4,07E-01 |
| 212.600.742.187.500 | 0.78681 | 0.78628 | 0.99767 | 0.99714 | -7,21E-01   | 2,78E-02 | 21260 | 0.95007 | 0.95036 | 10.010  | 10.012 | 0.00033800 | 4,33E-01 |
