# Supplementary material
Source: PubMed Central journal article supplement (PMC8325642)
Supplement: NIHMS1698257-supplement-Fig__4A__Insertase_pH6.pdf [file NIHMS1698257-supplement-Fig__4A__Insertase_pH6.pdf]

| Energy              | Insertase-201604-pH6 | nbkg        | Flat                   | fbkg | nder        | nsec        | H          | Energy | Mo Foil | nbkg        | Flat        | fbkg        | nder        | nsec      |           |
|---------------------|----------------------|-------------|------------------------|------|-------------|-------------|------------|--------|---------|-------------|-------------|-------------|-------------|-----------|-----------|
| 196.910.605.468.750 | 0.0013800            | 0.0013800   | 0.00138000003062189    |      | 0.0013800   | -0.00028900 | 4,13E-01   | 19691  |         | 0.0016000   | 0.0016000   | 0.0016000   | 0.0016000   | -6,15E-01 | 3,87E-02  |
| 196.950.957.031.250 | 0.00021300           | 0.00021300  | 0.000213000006624497   |      | 0.00021300  | -0.00012300 | 4,31E-01   | 19695  |         | 0.0013500   | 0.0013500   | 0.0013500   | 0.0013500   | -4,59E-01 | 3,39E-02  |
| 196.991.308.593.750 | 0.00039200           | 0.00039200  | 0.000391999987186864   |      | 0.00039200  | 5,86E-01    | 4,06E-01   | 19699  |         | 0.0012300   | 0.0012300   | 0.0012300   | 0.0012300   | -3,42E-01 | 1,55E-02  |
| 197.031.699.218.750 | 0.00068700           | 0.00068700  | 0.000686999992467463   |      | 0.00068700  | 0.00020500  | 1,31E-01   | 19703  |         | 0.0010800   | 0.0010800   | 0.0010800   | 0.0010800   | -3,34E-01 | 1,67E-02  |
| 197.073.125.000.000 | 0.0020700            | 0.0020700   | 0.00206999992951751    |      | 0.0020700   | 0.00016600  | -7,78E-01  | 19707  |         | 0.00095900  | 0.00095900  | 0.00095900  | 0.00095900  | -2,05E-01 | 2,11E-02  |
| 197.113.535.156.250 | 0.0020500            | 0.0020500   | 0.002050000001005828   |      | 0.0020500   | -0.00043100 | -3,42E-01  | 19711  |         | 0.00091000  | 0.00091000  | 0.00091000  | 0.00091000  | -1,61E-01 | -8,30E-03 |
| 197.153.964.843.750 | -0.0014100           | -0.0014100  | -0.00141000002622604   |      | -0.0014100  | -0.00011000 | 0,00010700 | 19715  |         | 0.00082900  | 0.00082900  | 0.00082900  | 0.00082900  | -2,73E-01 | 3,23E-03  |
| 197.194.394.531.250 | 0.0011500            | 0.0011500   | 0.001150000002551824   |      | 0.0011500   | 0.00043400  | 7,14E-02   | 19719  |         | 0.00069000  | 0.00069000  | 0.00069000  | 0.00069000  | -1,35E-01 | 1,66E-02  |
| 197.234.863.281.250 | 0.0021000            | 0.0021000   | 0.00209999992512166    |      | 0.0021000   | -5,24E-01   | -8,39E-01  | 19723  |         | 0.00072000  | 0.00072000  | 0.00072000  | 0.00072000  | -1,39E-01 | -1,46E-02 |
| 197.275.332.031.250 | 0.00073000           | 0.00073000  | 0.000730000028852373   |      | 0.00073000  | -0.00024500 | 1,78E-01   | 19728  |         | 0.00057800  | 0.00057800  | 0.00057800  | 0.00057800  | -2,53E-01 | -9,07E-03 |
| 197.315.839.843.750 | 0.00011900           | 0.00011900  | 0.000118999996630009   |      | 0.00011900  | 9,16E-01    | 4,89E-01   | 19732  |         | 0.00051600  | 0.00051600  | 0.00051600  | 0.00051600  | -2,12E-01 | 3,50E-03  |
| 197.356.347.656.250 | 0.0014700            | 0.0014700   | 0.001470000001743436   |      | 0.0014700   | 0.00015200  | -1,10E-01  | 19736  |         | 0.00040600  | 0.00040600  | 0.00040600  | 0.00040600  | -2,24E-01 | 3,48E-03  |
| 197.396.875.000.000 | 0.0013500            | 0.0013500   | 0.001350000003501773   |      | 0.0013500   | 2,28E-02    | -3,29E-01  | 19740  |         | 0.00033400  | 0.00033400  | 0.00033400  | 0.00033400  | -1,84E-01 | 3,32E-03  |
| 197.437.421.875.000 | 0.0014900            | 0.0014900   | 0.001490000005330890   |      | 0.0014900   | -0.00011500 | -1,77E-01  | 19744  |         | 0.00025700  | 0.00025700  | 0.00025700  | 0.00025700  | -1,97E-01 | 1,27E-03  |
| 197.477.968.750.000 | 0.00041700           | 0.00041700  | 0.000417000002926216   |      | 0.00041700  | -0.00014100 | -1,73E-02  | 19748  |         | 0.00017400  | 0.00017400  | 0.00017400  | 0.00017400  | -1,74E-01 | 1,48E-02  |
| 197.518.554.687.500 | 0.00034400           | 0.00034400  | 0.000344000000040978   |      | 0.00034400  | -0.00012900 | 2,92E-01   | 19752  |         | 0.00011600  | 0.00011600  | 0.00011600  | 0.00011600  | -7,68E-02 | -3,09E-03 |
| 197.559.140.625.000 | -0.00063100          | -0.00063100 | -0.000630999973509461  |      | -0.00063100 | 9,54E-01    | 6,56E-01   | 19756  |         | 0.00011200  | 0.00011200  | 0.00011200  | 0.00011200  | -1,99E-01 | -1,80E-02 |
| 197.599.765.625.000 | 0.0011200            | 0.0011200   | 0.001120000002991408   |      | 0.0011200   | 0.00040400  | 9,44E-02   | 19760  |         | -4,53E-01   | -4,53E-01   | -4,53E-01   | -4,53E-01   | -2,23E-01 | -8,95E-04 |
| 197.640.390.625.000 | 0.0026500            | 0.0026500   | 0.00264999992214143    |      | 0.0026500   | 0.00017200  | -8,67E-01  | 19764  |         | -6,96E-01   | -6,96E-01   | -6,96E-01   | -6,96E-01   | -2,06E-01 | 2,18E-03  |
| 197.681.035.156.250 | 0.0025200            | 0.0025200   | 0.002520000009641051   |      | 0.0025200   | -0.00030100 | -6,57E-01  | 19768  |         | -0.00021300 | -0.00021300 | -0.00021300 | -0.00021300 | -2,06E-01 | 5,97E-03  |
| 197.721.699.218.750 | 0.00020400           | 0.00020400  | 0.000203999996301718   |      | 0.00020400  | -0.00036200 | 3,45E-02   | 19772  |         | -0.00023700 | -0.00023700 | -0.00023700 | -0.00023700 | -1,57E-01 | -6,65E-03 |
| 197.762.382.812.500 | -0.00042600          | -0.00042600 | -0.000426000013248995  |      | -0.00042600 | -0.00027300 | 2,55E-01   | 19776  |         | -0.00034100 | -0.00034100 | -0.00034100 | -0.00034100 | -2,60E-01 | 2,16E-04  |
| 197.802.031.250.000 | -0.0019900           | -0.0019900  | -0.00199000001884997   |      | -0.0019900  | -0.00015700 | 5,63E-01   | 19780  |         | -0.00044500 | -0.00044500 | -0.00044500 | -0.00044500 | -1,56E-01 | 3,55E-02  |
| 197.842.753.906.250 | -0.0016900           | -0.0016900  | -0.00168999994639307   |      | -0.0016900  | 0.00018000  | 2,46E-01   | 19784  |         | -0.00046600 | -0.00046600 | -0.00046600 | -0.00046600 | 2,54E-02  | 2,05E-02  |
| 197.883.476.562.500 | -0.00052300          | -0.00052300 | -0.0005230000024259090 |      | -0.00052300 | 4,33E-01    | -3,68E-01  | 19788  |         | -0.00042500 | -0.00042500 | -0.00042500 | -0.00042500 | 1,13E-02  | -2,00E-02 |
| 197.924.218.750.000 | -0.0013300           | -0.0013300  | -0.00132999999914318   |      | -0.0013300  | -0.00012000 | 1,12E-01   | 19792  |         | -0.00045700 | -0.00045700 | -0.00045700 | -0.00045700 | -1,38E-01 | -1,14E-02 |
| 197.964.980.468.750 | -0.0015000           | -0.0015000  | -0.001500000001303852  |      | -0.0015000  | 0.00013500  | 2,32E-01   | 19796  |         | -0.00053700 | -0.00053700 | -0.00053700 | -0.00053700 | -8,13E-02 | 5,96E-03  |
| 198.004.726.562.500 | -0.00024800          | -0.00024800 | -0.00024799999645376   |      | -0.00024800 | 6,75E-01    | -5,16E-01  | 19800  |         | -0.00052200 | -0.00052200 | -0.00052200 | -0.00052200 | -8,97E-02 | 3,47E-03  |
| 198.045.527.343.750 | -0.00095500          | -0.00095500 | -0.000954999995883554  |      | -0.00095500 | -0.00028100 | -2,51E-01  | 19805  |         | -0.00060900 | -0.00060900 | -0.00060900 | -0.00060900 | -5,34E-02 | -1,64E-02 |
| 198.086.328.125.000 | -0.0025400           | -0.0025400  | -0.00254000001586974   |      | -0.0025400  | -0.00013800 | 4,24E-01   | 19809  |         | -0.00056600 | -0.00056600 | -0.00056600 | -0.00056600 | -2,24E-01 | -1,45E-02 |
| 198.127.167.968.750 | -0.0020800           | -0.0020800  | -0.00208000000566244   |      | -0.0020800  | 6,49E-01    | 2,99E-01   | 19813  |         | -0.00079200 | -0.00079200 | -0.00079200 | -0.00079200 | -1,72E-01 | 1,61E-02  |
| 198.166.972.656.250 | -0.0020200           | -0.0020200  | -0.00202000001445413   |      | -0.0020200  | 0.00010300  | 1,78E-01   | 19817  |         | -0.00070400 | -0.00070400 | -0.00070400 | -0.00070400 | -9,40E-02 | -1,04E-02 |
| 198.207.832.031.250 | -0.0012500           | -0.0012500  | -0.00124999997206032   |      | -0.0012500  | 0.00020800  | -5,08E-01  | 19821  |         | -0.00086800 | -0.00086800 | -0.00086800 | -0.00086800 | -2,56E-01 | -1,22E-02 |
| 198.248.710.937.500 | -0.00031800          | -0.00031800 | -0.000318000005790964  |      | -0.00031800 | -0.00031200 | -5,04E-01  | 19825  |         | -0.00091300 | -0.00091300 | -0.00091300 | -0.00091300 | -1,94E-01 | 3,60E-03  |

|                     |             |             |                        |             |             |             |       |             |             |             |             |            |           |
|---------------------|-------------|-------------|------------------------|-------------|-------------|-------------|-------|-------------|-------------|-------------|-------------|------------|-----------|
| 198.288.574.218.750 | -0.0037600  | -0.0037600  | -0.00375999999232590   | -0.0037600  | -0.00019800 | 7,51E-01    | 19829 | -0.0010200  | -0.0010200  | -0.0010200  | -0.0010200  | -2,26E-01  | 8,78E-03  |
| 198.329.492.187.500 | -0.0019200  | -0.0019200  | -0.001919999995149672  | -0.0019200  | 0.00029500  | 4,30E-01    | 19833 | -0.0011000  | -0.0011000  | -0.0011000  | -0.0011000  | -1,23E-01  | 2,11E-02  |
| 198.370.429.687.500 | -0.0013500  | -0.0013500  | -0.001350000003501773  | -0.0013500  | 0.00015400  | -6,47E-01   | 19837 | -0.0011200  | -0.0011200  | -0.0011200  | -0.0011200  | -5,37E-02  | 7,46E-03  |
| 198.410.312.500.000 | -0.00067900 | -0.00067900 | -0.0006789999989759177 | -0.00067900 | -0.00022900 | -1,47E-01   | 19841 | -0.0011400  | -0.0011400  | -0.0011400  | -0.0011400  | -6,26E-02  | -3,28E-04 |
| 198.451.289.062.500 | -0.0032000  | -0.0032000  | -0.00319999991916120   | -0.0032000  | 3,48E-01    | 8,69E-01    | 19845 | -0.0011800  | -0.0011800  | -0.0011800  | -0.0011800  | -5,63E-02  | -5,79E-06 |
| 198.491.230.468.750 | -0.00039800 | -0.00039800 | -0.000398000003769994  | -0.00039800 | 0.00047400  | -4,25E-01   | 19849 | -0.0011900  | -0.0011900  | -0.0011900  | -0.0011900  | -6,27E-02  | 1,31E-03  |
| 198.532.226.562.500 | 0.00063900  | 0.00063900  | 0.000638999976217747   | 0.00063900  | -0.00030900 | -0.00010300 | 19853 | -0.0012300  | -0.0012300  | -0.0012300  | -0.0012300  | -4,57E-02  | 2,59E-02  |
| 198.572.187.500.000 | -0.0029000  | -0.0029000  | -0.00289999996311963   | -0.0029000  | -0.00036300 | 9,86E-01    | 19857 | -0.0012200  | -0.0012200  | -0.0012200  | -0.0012200  | 1,47E-01   | 1,03E-02  |
| 198.613.222.656.250 | -0.0023000  | -0.0023000  | -0.00230000005103648   | -0.0023000  | 0.00048900  | 5,58E-01    | 19861 | -0.0011100  | -0.0011100  | -0.0011100  | -0.0011100  | 3,81E-02   | -2,22E-02 |
| 198.654.277.343.750 | 0.0011200   | 0.0011200   | 0.00112000002991408    | 0.0011200   | 9,47E-01    | -6,18E-01   | 19865 | -0.0011900  | -0.0011900  | -0.0011900  | -0.0011900  | -3,51E-02  | -8,72E-04 |
| 198.694.296.875.000 | -0.0015400  | -0.0015400  | -0.00153999996837229   | -0.0015400  | -1,20E-01   | 1,94E-01    | 19869 | -0.0011400  | -0.0011400  | -0.0011400  | -0.0011400  | 3,10E-02   | 1,00E-02  |
| 198.735.390.625.000 | 0.0010200   | 0.0010200   | 0.00101999996695668    | 0.0010200   | 0.00025200  | -2,50E-01   | 19874 | -0.0011700  | -0.0011700  | -0.0011700  | -0.0011700  | 4,60E-02   | 1,97E-02  |
| 198.775.429.687.500 | 0.00050600  | 0.00050600  | 0.000506000011228025   | 0.00050600  | -0.00021500 | -3,31E-01   | 19878 | -0.0011000  | -0.0011000  | -0.0011000  | -0.0011000  | 1,91E-01   | 7,74E-03  |
| 198.815.488.281.250 | -0.00070300 | -0.00070300 | -0.000702999997884035  | -0.00070300 | -1,36E-01   | 8,94E-02    | 19882 | -0.0010100  | -0.0010100  | -0.0010100  | -0.0010100  | 1,08E-01   | -4,84E-03 |
| 198.856.640.625.000 | 0.00039600  | 0.00039600  | 0.000395999988541007   | 0.00039600  | -0.00014200 | -7,45E-02   | 19886 | -0.0010100  | -0.0010100  | -0.0010100  | -0.0010100  | 1,51E-01   | 1,88E-02  |
| 198.896.738.281.250 | -0.0018600  | -0.0018600  | -0.00185999996028841   | -0.0018600  | -7,41E-01   | 1,90E-01    | 19890 | -0.00089000 | -0.00089000 | -0.00089000 | -0.00089000 | 2,61E-01   | 1,16E-03  |
| 198.937.910.156.250 | -0.00020600 | -0.00020600 | -0.000205999996978790  | -0.00020600 | 1,21E-01    | 6,28E-03    | 19894 | -0.00079800 | -0.00079800 | -0.00079800 | -0.00079800 | 1,61E-01   | -7,45E-03 |
| 198.978.046.875.000 | -0.0017600  | -0.0017600  | -0.0017600001374632    | -0.0017600  | -6,90E-01   | 2,55E-01    | 19898 | -0.00075900 | -0.00075900 | -0.00075900 | -0.00075900 | 2,00E-01   | 2,80E-02  |
| 199.018.183.593.750 | -0.00076000 | -0.00076000 | -0.000760000024456531  | -0.00076000 | 0.00021700  | 4,99E-02    | 19902 | -0.00063700 | -0.00063700 | -0.00063700 | -0.00063700 | 3,86E-01   | 2,82E-02  |
| 199.059.414.062.500 | 1,14E-02    | 1,14E-02    | 1,14E+08               | 1,14E-02    | -2,84E-01   | -6,43E-01   | 19906 | -0.00044500 | -0.00044500 | -0.00044500 | -0.00044500 | 4,30E-01   | 3,61E-02  |
| 199.099.589.843.750 | -0.00099200 | -0.00099200 | -0.000991999986581504  | -0.00099200 | -0.00030700 | 1,44E-01    | 19910 | -0.00028700 | -0.00028700 | -0.00028700 | -0.00028700 | 6,80E-01   | 3,07E-02  |
| 199.139.785.156.250 | -0.0024700  | -0.0024700  | -0.00246999994851649   | -0.0024700  | 8,69E-01    | 6,64E-01    | 19914 | 0.00010100  | 0.00010100  | 0.00010100  | 0.00010100  | 6,77E-01   | -2,34E-02 |
| 199.181.054.687.500 | -0.00028400 | -0.00028400 | -0.000284000008832663  | -0.00028400 | 0.00023400  | -1,41E-02   | 19918 | 0.00026400  | 0.00026400  | 0.00026400  | 0.00026400  | 4,89E-01   | 1,14E-02  |
| 199.221.289.062.500 | -0.00056400 | -0.00056400 | -0.000563999987207353  | -0.00056400 | 7,54E-01    | 7,91E-02    | 19922 | 0.00049900  | 0.00049900  | 0.00049900  | 0.00049900  | 7,70E-01   | 3,84E-02  |
| 199.261.542.968.750 | 0.00032400  | 0.00032400  | 0.000323999993270263   | 0.00032400  | 0.00029700  | -1,17E-01   | 19926 | 0.00088400  | 0.00088400  | 0.00088400  | 0.00088400  | 7,98E-01   | 1,62E-02  |
| 199.302.871.093.750 | 0.0018600   | 0.0018600   | 0.00185999996028841    | 0.0018600   | -1,98E-01   | -6,35E-02   | 19930 | 0.0011500   | 0.0011500   | 0.0011500   | 0.0011500   | 9,02E-01   | 6,00E-02  |
| 199.343.144.531.250 | 0.00016200  | 0.00016200  | 0.000161999996635132   | 0.00016200  | 0.00024500  | 5,70E-01    | 19934 | 0.0016200   | 0.0016200   | 0.0016200   | 0.0016200   | 0.00012900 | 6,57E-02  |
| 199.383.457.031.250 | 0.0038400   | 0.0038400   | 0.00383999990299344    | 0.0038400   | 0.00044000  | 3,62E-02    | 19938 | 0.0021900   | 0.0021900   | 0.0021900   | 0.0021900   | 0.00014300 | 1,88E-02  |
| 199.423.769.531.250 | 0.0037100   | 0.0037100   | 0.00371000007726252    | 0.0037100   | 0.00027500  | -4,28E-01   | 19942 | 0.0027700   | 0.0027700   | 0.0027700   | 0.0027700   | 0.00014400 | 4,53E-02  |
| 199.464.101.562.500 | 0.0060500   | 0.0060500   | 0.00604999996721745    | 0.0060500   | 9,50E-01    | -1,80E-01   | 19946 | 0.0033500   | 0.0033500   | 0.0033500   | 0.0033500   | 0.00018000 | 8,54E-02  |
| 199.505.507.812.500 | 0.0044800   | 0.0044800   | 0.00448000011965632    | 0.0044800   | 0.00012800  | 1,60E-01    | 19951 | 0.0042400   | 0.0042400   | 0.0042400   | 0.0042400   | 0.00021400 | 7,16E-02  |
| 199.545.878.906.250 | 0.0071000   | 0.0071000   | 0.00710000004619360    | 0.0071000   | 0.00022600  | -9,06E-02   | 19955 | 0.0051000   | 0.0051000   | 0.0051000   | 0.0051000   | 0.00023800 | 9,97E-02  |
| 199.586.250.000.000 | 0.0063100   | 0.0063100   | 0.00631000008434057    | 0.0063100   | 5,47E-01    | 2,24E-01    | 19959 | 0.0061700   | 0.0061700   | 0.0061700   | 0.0061700   | 0.00029400 | 1,78E-01  |
| 199.626.640.625.000 | 0.0075400   | 0.0075400   | 0.00754000013694167    | 0.0075400   | 0.00040700  | 7,19E-01    | 19963 | 0.0074700   | 0.0074700   | 0.0074700   | 0.0074700   | 0.00038200 | 2,57E-01  |
| 199.667.070.312.500 | 0.0096000   | 0.0096000   | 0.00960000045597553    | 0.0096000   | 0.00063600  | -1,41E-01   | 19967 | 0.0092600   | 0.0092600   | 0.0092600   | 0.0092600   | 0.00050200 | 3,39E-01  |

|                     |          |          |                     |          |             |             |       |          |          |          |          |            |             |
|---------------------|----------|----------|---------------------|----------|-------------|-------------|-------|----------|----------|----------|----------|------------|-------------|
| 199.707.500.000.000 | 0.012700 | 0.012700 | 0.0126999998465180  | 0.012700 | 0.00029400  | 2,29E-01    | 19971 | 0.011500 | 0.011500 | 0.011500 | 0.011500 | 0.00065700 | 4,98E-01    |
| 199.747.949.218.750 | 0.012000 | 0.012000 | 0.0120000001043081  | 0.012000 | 0.00082100  | 0.00015600  | 19975 | 0.014600 | 0.014600 | 0.014600 | 0.014600 | 0.00090500 | 8,17E-01    |
| 199.788.398.437.500 | 0.019300 | 0.019300 | 0.0193000007420778  | 0.019300 | 0.00155500  | 5,82E-01    | 19979 | 0.018900 | 0.018900 | 0.018900 | 0.018900 | 0.0013200  | 0.00013600  |
| 199.829.960.937.500 | 0.024700 | 0.024700 | 0.0247000008821487  | 0.024700 | 0.0013000   | 5,01E-01    | 19983 | 0.025400 | 0.025400 | 0.025400 | 0.025400 | 0.0020200  | 0.00015100  |
| 199.870.449.218.750 | 0.030000 | 0.030000 | 0.0299999993294477  | 0.030000 | 0.0019600   | 0.00093300  | 19987 | 0.035500 | 0.035500 | 0.035500 | 0.035500 | 0.0025500  | 0.00029800  |
| 199.872.578.125.000 | 0.033100 | 0.033100 | 0.03310000015139580 | 0.033100 | 0.0052700   | -0.0015200  | 19987 | 0.036300 | 0.036300 | 0.036300 | 0.036300 | 0.0032900  | 0.0011200   |
| 199.875.781.250.000 | 0.032800 | 0.032800 | 0.0328000001609325  | 0.032800 | 0.0011500   | -0.0045000  | 19988 | 0.037200 | 0.037200 | 0.037200 | 0.037200 | 0.0031500  | 0.00036300  |
| 199.878.984.375.000 | 0.033800 | 0.033800 | 0.03379999984622002 | 0.033800 | 0.0023900   | 0.0010800   | 19988 | 0.038300 | 0.038300 | 0.038300 | 0.038300 | 0.0035200  | 0.0013300   |
| 199.882.167.968.750 | 0.034300 | 0.034300 | 0.0342999994754791  | 0.034300 | 0.0018400   | 0.0036600   | 19988 | 0.039500 | 0.039500 | 0.039500 | 0.039500 | 0.0040000  | 0.0013400   |
| 199.885.371.093.750 | 0.035000 | 0.035000 | 0.0350000001490116  | 0.035000 | 0.0047300   | -0.00036300 | 19989 | 0.040800 | 0.040800 | 0.040800 | 0.040800 | 0.0043800  | 0.00079900  |
| 199.888.574.218.750 | 0.037300 | 0.037300 | 0.03730000018298626 | 0.037300 | 0.0016100   | -0.0075200  | 19989 | 0.042300 | 0.042300 | 0.042300 | 0.042300 | 0.0045100  | 9,89E-01    |
| 199.890.703.125.000 | 0.035900 | 0.035900 | 0.0359000004827976  | 0.035900 | 0.00072300  | 0.012000    | 19989 | 0.043200 | 0.043200 | 0.043200 | 0.043200 | 0.0044300  | -0.00019100 |
| 199.893.906.250.000 | 0.037700 | 0.037700 | 0.03770000011503696 | 0.037700 | 0.0080000   | -0.00011400 | 19989 | 0.044600 | 0.044600 | 0.044600 | 0.044600 | 0.0044100  | 0.00059400  |
| 199.897.109.375.000 | 0.041000 | 0.041000 | 0.04100000011324883 | 0.041000 | 0.00065000  | -0.0072800  | 19990 | 0.046100 | 0.046100 | 0.046100 | 0.046100 | 0.0048200  | 0.0021500   |
| 199.900.292.968.750 | 0.038100 | 0.038100 | 0.0381000004708767  | 0.038100 | 0.0033500   | 0.012000    | 19990 | 0.047700 | 0.047700 | 0.047700 | 0.047700 | 0.0057800  | 0.0018900   |
| 199.903.496.093.750 | 0.043100 | 0.043100 | 0.0430999994277954  | 0.043100 | 0.0083000   | -0.0036400  | 19990 | 0.049800 | 0.049800 | 0.049800 | 0.049800 | 0.0060200  | 0.00037200  |
| 199.906.699.218.750 | 0.043500 | 0.043500 | 0.0434999987483025  | 0.043500 | 0.0010200   | -0.0084600  | 19991 | 0.051600 | 0.051600 | 0.051600 | 0.051600 | 0.0060200  | 0.0010600   |
| 199.908.828.125.000 | 0.043700 | 0.043700 | 0.0436999984085560  | 0.043700 | 0.0037900   | 0.0070600   | 19991 | 0.053000 | 0.053000 | 0.053000 | 0.053000 | 0.0065800  | 0.0021800   |
| 199.912.031.250.000 | 0.045500 | 0.045500 | 0.0454999990761280  | 0.045500 | 0.0047800   | 0.0045100   | 19991 | 0.055100 | 0.055100 | 0.055100 | 0.055100 | 0.0071800  | 0.0014800   |
| 199.915.234.375.000 | 0.046700 | 0.046700 | 0.0467000007629395  | 0.046700 | 0.0066700   | 0.00024900  | 19992 | 0.057600 | 0.057600 | 0.057600 | 0.057600 | 0.0075300  | 0.0014400   |
| 199.918.437.500.000 | 0.049800 | 0.049800 | 0.04980000010848045 | 0.049800 | 0.0049400   | -0.010600   | 19992 | 0.059900 | 0.059900 | 0.059900 | 0.059900 | 0.0081000  | 0.0022600   |
| 199.921.621.093.750 | 0.049900 | 0.049900 | 0.0498999990522862  | 0.049900 | -0.00010900 | -0.0017400  | 19992 | 0.062700 | 0.062700 | 0.062700 | 0.062700 | 0.0089800  | 0.0024400   |
| 199.924.824.218.750 | 0.049700 | 0.049700 | 0.0496999993920326  | 0.049700 | 0.0038300   | 0.026200    | 19992 | 0.065600 | 0.065600 | 0.065600 | 0.065600 | 0.0096600  | 0.0033600   |
| 199.926.953.125.000 | 0.051900 | 0.051900 | 0.0518999993801117  | 0.051900 | 0.013800    | -0.00025100 | 19993 | 0.067900 | 0.067900 | 0.067900 | 0.067900 | 0.010800   | 0.0031700   |
| 199.930.156.250.000 | 0.057100 | 0.057100 | 0.05710000017225742 | 0.057100 | 0.0037000   | -0.015400   | 19993 | 0.071400 | 0.071400 | 0.071400 | 0.071400 | 0.011400   | 0.0030000   |
| 199.933.359.375.000 | 0.054300 | 0.054300 | 0.0542999990284443  | 0.054300 | 0.0039900   | 0.0081800   | 19993 | 0.075200 | 0.075200 | 0.075200 | 0.075200 | 0.012700   | 0.0043000   |
| 199.936.562.500.000 | 0.059600 | 0.059600 | 0.0595999993383884  | 0.059600 | 0.0089300   | 0.0062800   | 19994 | 0.079500 | 0.079500 | 0.079500 | 0.079500 | 0.014100   | 0.0038300   |
| 199.939.765.625.000 | 0.060000 | 0.060000 | 0.0599999986588955  | 0.060000 | 0.0080100   | 0.0064900   | 19994 | 0.084200 | 0.084200 | 0.084200 | 0.084200 | 0.015100   | 0.0044700   |
| 199.942.968.750.000 | 0.064800 | 0.064800 | 0.06480000016808510 | 0.064800 | 0.013100    | 0.0050600   | 19994 | 0.089200 | 0.089200 | 0.089200 | 0.089200 | 0.017000   | 0.0078600   |
| 199.945.097.656.250 | 0.067000 | 0.067000 | 0.06700000016689301 | 0.067000 | 0.010700    | -0.0026600  | 19995 | 0.093200 | 0.093200 | 0.093200 | 0.093200 | 0.019300   | 0.0060300   |
| 199.948.300.781.250 | 0.070500 | 0.070500 | 0.07050000013113022 | 0.070500 | 0.011700    | -0.0022400  | 19995 | 0.099500 | 0.099500 | 0.099500 | 0.099500 | 0.020200   | 0.0053100   |
| 199.951.503.906.250 | 0.074500 | 0.074500 | 0.07450000019669533 | 0.074500 | 0.0092800   | 0.0027200   | 19995 | 0.10616  | 0.10616  | 0.10616  | 0.10616  | 0.022700   | 0.0087600   |
| 199.954.687.500.000 | 0.076400 | 0.076400 | 0.0763999968767166  | 0.076400 | 0.013400    | 0.013200    | 19995 | 0.11404  | 0.11404  | 0.11404  | 0.11404  | 0.025800   | 0.0067500   |
| 199.957.890.625.000 | 0.083100 | 0.083100 | 0.0830999985337257  | 0.083100 | 0.017700    | 0.00073800  | 19996 | 0.12263  | 0.12263  | 0.12263  | 0.12263  | 0.027000   | 0.0051700   |
| 199.961.093.750.000 | 0.087700 | 0.087700 | 0.08770000018954277 | 0.087700 | 0.013900    | -0.0080700  | 19996 | 0.13135  | 0.13135  | 0.13135  | 0.13135  | 0.029100   | 0.0094800   |

|                     |          |          |                    |          |          |             |       |         |         |         |         |          |             |
|---------------------|----------|----------|--------------------|----------|----------|-------------|-------|---------|---------|---------|---------|----------|-------------|
| 199.963.222.656.250 | 0.090500 | 0.090500 | 0.0904999971389771 | 0.090500 | 0.013400 | 0.0062300   | 19996 | 0.13814 | 0.13814 | 0.13814 | 0.13814 | 0.032100 | 0.0076900   |
| 199.966.425.781.250 | 0.094900 | 0.094900 | 0.0948999971151352 | 0.094900 | 0.017200 | 0.016200    | 19997 | 0.14850 | 0.14850 | 0.14850 | 0.14850 | 0.033200 | 0.0060300   |
| 199.969.628.906.250 | 0.10150  | 0.10150  | 0.101497679948807  | 0.10150  | 0.023800 | 0.012700    | 19997 | 0.15942 | 0.15942 | 0.15942 | 0.15942 | 0.036000 | 0.0085400   |
| 199.972.832.031.250 | 0.11010  | 0.11010  | 0.110102429986000  | 0.11010  | 0.025300 | 0.0035500   | 19997 | 0.17152 | 0.17152 | 0.17152 | 0.17152 | 0.038700 | 0.0072300   |
| 199.976.035.156.250 | 0.11774  | 0.11774  | 0.117736347019672  | 0.11774  | 0.026000 | 0.0044400   | 19998 | 0.18420 | 0.18420 | 0.18420 | 0.18420 | 0.040600 | 0.0059300   |
| 199.979.238.281.250 | 0.12679  | 0.12679  | 0.126790881156921  | 0.12679  | 0.028200 | 0.0085600   | 19998 | 0.19754 | 0.19754 | 0.19754 | 0.19754 | 0.042500 | 0.0036900   |
| 199.981.367.187.500 | 0.13275  | 0.13275  | 0.132754966616631  | 0.13275  | 0.030600 | 0.0090500   | 19998 | 0.20684 | 0.20684 | 0.20684 | 0.20684 | 0.042600 | 0.0026200   |
| 199.984.570.312.500 | 0.14310  | 0.14310  | 0.143098160624504  | 0.14310  | 0.033000 | 0.012500    | 19998 | 0.22023 | 0.22023 | 0.22023 | 0.22023 | 0.043900 | 0.0053800   |
| 199.987.773.437.500 | 0.15388  | 0.15388  | 0.153876900672913  | 0.15388  | 0.038600 | 0.013900    | 19999 | 0.23492 | 0.23492 | 0.23492 | 0.23492 | 0.046000 | 0.0032700   |
| 199.990.976.562.500 | 0.16786  | 0.16786  | 0.167855665087700  | 0.16786  | 0.041900 | 0.0079500   | 19999 | 0.24973 | 0.24973 | 0.24973 | 0.24973 | 0.046000 | 0.0024200   |
| 199.994.179.687.500 | 0.18073  | 0.18073  | 0.180730983614922  | 0.18073  | 0.043700 | 0.014700    | 19999 | 0.26438 | 0.26438 | 0.26438 | 0.26438 | 0.047600 | 0.0015400   |
| 199.996.308.593.750 | 0.19116  | 0.19116  | 0.191156387329102  | 0.19116  | 0.049700 | 0.014400    | 20000 | 0.27509 | 0.27509 | 0.27509 | 0.27509 | 0.046800 | -0.0060700  |
| 199.999.511.718.750 | 0.20724  | 0.20724  | 0.20723873768463   | 0.20724  | 0.051400 | 0.00096600  | 20000 | 0.28931 | 0.28931 | 0.28931 | 0.28931 | 0.044300 | -0.0026500  |
| 200.002.714.843.750 | 0.22406  | 0.22406  | 0.224056616425514  | 0.22406  | 0.050400 | -0.0020300  | 20000 | 0.30346 | 0.30346 | 0.30346 | 0.30346 | 0.045100 | 0.0027800   |
| 200.005.917.968.750 | 0.23951  | 0.23951  | 0.239513874053955  | 0.23951  | 0.050100 | -0.00022300 | 20001 | 0.31821 | 0.31821 | 0.31821 | 0.31821 | 0.046100 | 0.00026100  |
| 200.009.121.093.750 | 0.25617  | 0.25617  | 0.256172925233841  | 0.25617  | 0.050200 | 0.0034700   | 20001 | 0.33302 | 0.33302 | 0.33302 | 0.33302 | 0.045300 | -0.00041800 |
| 200.012.324.218.750 | 0.27165  | 0.27165  | 0.271647095680237  | 0.27165  | 0.052300 | 0.014400    | 20001 | 0.34717 | 0.34717 | 0.34717 | 0.34717 | 0.045800 | 0.0024800   |
| 200.014.453.125.000 | 0.28406  | 0.28406  | 0.284061044454575  | 0.28406  | 0.057900 | 0.0023000   | 20001 | 0.35745 | 0.35745 | 0.35745 | 0.35745 | 0.046600 | -0.0022300  |
| 200.017.656.250.000 | 0.30255  | 0.30255  | 0.302552819252014  | 0.30255  | 0.053600 | -0.013400   | 20002 | 0.37204 | 0.37204 | 0.37204 | 0.37204 | 0.044700 | -0.0035800  |
| 200.020.859.375.000 | 0.31839  | 0.31839  | 0.318388700485229  | 0.31839  | 0.049300 | -0.017200   | 20002 | 0.38608 | 0.38608 | 0.38608 | 0.38608 | 0.044300 | -0.00010400 |
| 200.024.062.500.000 | 0.33410  | 0.33410  | 0.334096729755402  | 0.33410  | 0.042600 | -0.012900   | 20002 | 0.40038 | 0.40038 | 0.40038 | 0.40038 | 0.044600 | 0.0017300   |
| 200.027.265.625.000 | 0.34567  | 0.34567  | 0.345674157142639  | 0.34567  | 0.041000 | -0.0020000  | 20003 | 0.41466 | 0.41466 | 0.41466 | 0.41466 | 0.045400 | 0.0021300   |
| 200.030.468.750.000 | 0.36039  | 0.36039  | 0.360391616821289  | 0.36039  | 0.041300 | -0.0072400  | 20003 | 0.42947 | 0.42947 | 0.42947 | 0.42947 | 0.046000 | -0.0017000  |
| 200.032.617.187.500 | 0.36776  | 0.36776  | 0.367762595415115  | 0.36776  | 0.037100 | -0.012600   | 20003 | 0.43924 | 0.43924 | 0.43924 | 0.43924 | 0.044500 | -0.0027800  |
| 200.035.820.312.500 | 0.38027  | 0.38027  | 0.380265176296234  | 0.38027  | 0.034500 | -0.013200   | 20004 | 0.45327 | 0.45327 | 0.45327 | 0.45327 | 0.044500 | -0.00025300 |
| 200.039.023.437.500 | 0.38986  | 0.38986  | 0.389860451221466  | 0.38986  | 0.028700 | -0.021700   | 20004 | 0.46770 | 0.46770 | 0.46770 | 0.46770 | 0.044300 | -0.0026400  |
| 200.042.226.562.500 | 0.39866  | 0.39866  | 0.398656189441681  | 0.39866  | 0.020600 | -0.013900   | 20004 | 0.48167 | 0.48167 | 0.48167 | 0.48167 | 0.042800 | -0.0018400  |
| 200.045.429.687.500 | 0.40306  | 0.40306  | 0.403059303760529  | 0.40306  | 0.019800 | 0.00091700  | 20005 | 0.49512 | 0.49512 | 0.49512 | 0.49512 | 0.043100 | 0.0034700   |
| 200.048.632.812.500 | 0.41133  | 0.41133  | 0.411334902048111  | 0.41133  | 0.021200 | -0.016100   | 20005 | 0.50928 | 0.50928 | 0.50928 | 0.50928 | 0.045000 | 0.00083500  |
| 200.050.761.718.750 | 0.41435  | 0.41435  | 0.414347231388092  | 0.41435  | 0.011200 | -0.018400   | 20005 | 0.51910 | 0.51910 | 0.51910 | 0.51910 | 0.043600 | -0.0021700  |
| 200.053.964.843.750 | 0.41732  | 0.41732  | 0.417315244674683  | 0.41732  | 0.011400 | 0.0013300   | 20005 | 0.53250 | 0.53250 | 0.53250 | 0.53250 | 0.043800 | 0.0045300   |
| 200.057.167.968.750 | 0.42164  | 0.42164  | 0.421642541885376  | 0.42164  | 0.012100 | 0.0024000   | 20006 | 0.54721 | 0.54721 | 0.54721 | 0.54721 | 0.046500 | 0.0031800   |
| 200.060.371.093.750 | 0.42505  | 0.42505  | 0.425051987171173  | 0.42505  | 0.012900 | 0.00016400  | 20006 | 0.56230 | 0.56230 | 0.56230 | 0.56230 | 0.045900 | -0.0014600  |
| 200.063.574.218.750 | 0.42991  | 0.42991  | 0.429910808801651  | 0.42991  | 0.012200 | -0.00058300 | 20006 | 0.57657 | 0.57657 | 0.57657 | 0.57657 | 0.045500 | 0.0035800   |
| 200.066.777.343.750 | 0.43286  | 0.43286  | 0.432856023311615  | 0.43286  | 0.012500 | 0.0076800   | 20007 | 0.59149 | 0.59149 | 0.59149 | 0.59149 | 0.048200 | 0.0043900   |

|                     |         |           |                   |           |          |            |       |         |         |         |         |            |            |
|---------------------|---------|-----------|-------------------|-----------|----------|------------|-------|---------|---------|---------|---------|------------|------------|
| 200.068.925.781.250 | 0.43664 | 0.43664   | 0.436635375022888 | 0.43664   | 0.016300 | 0.0071200  | 20007 | 0.60239 | 0.60239 | 0.60239 | 0.60239 | 0.047900   | 0.00079200 |
| 200.072.128.906.250 | 0.44157 | 0.44157   | 0.441572159528732 | 0.44157   | 0.016400 | 0.0038200  | 20007 | 0.61712 | 0.61712 | 0.61712 | 0.61712 | 0.048600   | 0.0066700  |
| 200.075.332.031.250 | 0.44710 | 0.44710   | 0.447103500366211 | 0.44710   | 0.018700 | 0.0081900  | 20008 | 0.63349 | 0.63349 | 0.63349 | 0.63349 | 0.052200   | 0.0096700  |
| 200.078.535.156.250 | 0.45358 | 0.45358   | 0.453580409288406 | 0.45358   | 0.021600 | 0.0059700  | 20008 | 0.65056 | 0.65056 | 0.65056 | 0.65056 | 0.054800   | 0.0063600  |
| 200.081.738.281.250 | 0.46095 | 0.46095   | 0.460954397916794 | 0.46095   | 0.022600 | -0.0015600 | 20008 | 0.66861 | 0.66861 | 0.66861 | 0.66861 | 0.056200   | 0.0044500  |
| 200.084.941.406.250 | 0.46802 | 0.46802   | 0.468020945787430 | 0.46802   | 0.020600 | 0.015100   | 20008 | 0.68656 | 0.68656 | 0.68656 | 0.68656 | 0.057600   | 0.0053400  |
| 200.087.070.312.500 | 0.47194 | 0.47194   | 0.471940755844116 | 0.47194   | 0.030600 | 0.010700   | 20009 | 0.69934 | 0.69934 | 0.69934 | 0.69934 | 0.059100   | 0.0029600  |
| 200.090.273.437.500 | 0.48433 | 0.48433   | 0.484326034784317 | 0.48433   | 0.026300 | -0.0056400 | 20009 | 0.71805 | 0.71805 | 0.71805 | 0.71805 | 0.059200   | 0.0021600  |
| 200.093.496.093.750 | 0.48885 | 0.48885   | 0.488850772380829 | 0.48885   | 0.027000 | 0.013600   | 20009 | 0.73742 | 0.73742 | 0.73742 | 0.73742 | 0.060500   | 0.0059400  |
| 200.096.699.218.750 | 0.50167 | 0.50167   | 0.501665472984314 | 0.50167   | 0.035000 | 0.016100   | 20010 | 0.75694 | 0.75694 | 0.75694 | 0.75694 | 0.063000   | 0.0080900  |
| 200.099.902.343.750 | 0.51126 | 0.51126   | 0.511261463165283 | 0.51126   | 0.037300 | 0.0054300  | 20010 | 0.77776 | 0.77776 | 0.77776 | 0.77776 | 0.065700   | 4.97E-01   |
| 200.102.031.250.000 | 0.52153 | -13.108   | 0.521552383899689 | -13.108   | 0.037900 | -0.0066700 | 20010 | 0.79194 | 0.73404 | 0.79198 | 0.73408 | 0.063100   | -0.0071500 |
| 200.105.234.375.000 | 0.53147 | -11.207   | 0.531516790390015 | -11.207   | 0.033700 | 0.0062300  | 20011 | 0.81137 | 0.74953 | 0.81149 | 0.74964 | 0.061800   | -0.0018100 |
| 200.108.437.500.000 | 0.54315 | -0.94011  | 0.543224275112152 | -0.94003  | 0.041900 | 0.012200   | 20011 | 0.83158 | 0.76454 | 0.83176 | 0.76472 | 0.061900   | -0.0039600 |
| 200.111.660.156.250 | 0.55842 | -0.76880  | 0.558520376682282 | -0.76870  | 0.041600 | -0.0055900 | 20011 | 0.85118 | 0.77907 | 0.85143 | 0.77932 | 0.059300   | -0.0066900 |
| 200.114.863.281.250 | 0.56983 | -0.60807  | 0.569964051246643 | -0.60794  | 0.038300 | 0.013400   | 20011 | 0.86965 | 0.79299 | 0.86997 | 0.79332 | 0.057600   | -0.0011400 |
| 200.118.066.406.250 | 0.58298 | -0.45610  | 0.583141207695007 | -0.45594  | 0.050100 | 0.016800   | 20012 | 0.88810 | 0.80646 | 0.88849 | 0.80685 | 0.058600   | -0.0060000 |
| 200.120.195.312.500 | 0.59661 | -0.36025  | 0.596788227558136 | -0.36007  | 0.047300 | -0.012400  | 20012 | 0.90093 | 0.81512 | 0.90137 | 0.81556 | 0.054400   | -0.016500  |
| 200.123.398.437.500 | 0.60820 | -0.22352  | 0.608407020568848 | -0.22331  | 0.043500 | 0.0012000  | 20012 | 0.91710 | 0.82773 | 0.91760 | 0.82823 | 0.049800   | -0.011000  |
| 200.126.621.093.750 | 0.62456 | -0.094500 | 0.624796032905579 | -0.094300 | 0.048100 | 0.0072300  | 20013 | 0.93290 | 0.83993 | 0.93347 | 0.84050 | 0.047400   | -0.0095400 |
| 200.129.824.218.750 | 0.63907 | 0.025400  | 0.639332234859467 | 0.025700  | 0.048200 | 0.0022400  | 20013 | 0.94751 | 0.85159 | 0.94815 | 0.85223 | 0.043700   | -0.012500  |
| 200.133.027.343.750 | 0.65545 | 0.13778   | 0.655736625194550 | 0.13807   | 0.049500 | 0.0012500  | 20013 | 0.96089 | 0.86282 | 0.96160 | 0.86353 | 0.039400   | -0.011400  |
| 200.136.230.468.750 | 0.67081 | 0.24207   | 0.671128451824188 | 0.24239   | 0.049000 | 0.00068600 | 20014 | 0.97274 | 0.87356 | 0.97352 | 0.87434 | 0.036300   | -0.014200  |
| 200.138.359.375.000 | 0.68156 | 0.30736   | 0.681890785694122 | 0.30770   | 0.049900 | -0.0091400 | 20014 | 0.98025 | 0.88047 | 0.98108 | 0.88129 | 0.031800   | -0.016200  |
| 200.141.582.031.250 | 0.69750 | 0.40001   | 0.697861969470978 | 0.40037   | 0.044100 | -0.0041800 | 20014 | 0.98975 | 0.89054 | 0.99064 | 0.89144 | 0.027700   | -0.013300  |
| 200.144.785.156.250 | 0.70991 | 0.48536   | 0.710299253463745 | 0.48575   | 0.047200 | 0.0079000  | 20014 | 0.99805 | 0.90015 | 0.99902 | 0.90112 | 0.023200   | -0.014200  |
| 200.147.988.281.250 | 0.72775 | 0.56374   | 0.728168368339539 | 0.56415   | 0.049200 | -0.0027000 | 20015 | 10.046  | 0.90932 | 10.057  | 0.91035 | 0.018600   | -0.014600  |
| 200.151.191.406.250 | 0.74137 | 0.63570   | 0.741814613342285 | 0.63614   | 0.045500 | -0.0020400 | 20015 | 10.100  | 0.91807 | 10.111  | 0.91918 | 0.013900   | -0.013900  |
| 200.154.394.531.250 | 0.75685 | 0.70151   | 0.757322072982788 | 0.70198   | 0.047900 | 0.0073200  | 20015 | 10.135  | 0.92643 | 10.147  | 0.92760 | 0.0097400  | -0.016000  |
| 200.156.542.968.750 | 0.76697 | 0.74241   | 0.767459511756897 | 0.74289   | 0.049400 | 0.00015100 | 20016 | 10.152  | 0.93182 | 10.164  | 0.93304 | 0.0053100  | -0.014800  |
| 200.159.746.093.750 | 0.78332 | 0.79871   | 0.783836185932159 | 0.79922   | 0.047900 | -0.014000  | 20016 | 10.164  | 0.93955 | 10.177  | 0.94084 | 0.0018200  | -0.011800  |
| 200.162.949.218.750 | 0.79770 | 0.84940   | 0.798237144947052 | 0.84994   | 0.040400 | -0.0079000 | 20016 | 10.163  | 0.94688 | 10.177  | 0.94824 | -0.0022300 | -0.011900  |
| 200.166.171.875.000 | 0.80927 | 0.89521   | 0.809837818145752 | 0.89578   | 0.042900 | 0.0074500  | 20017 | 10.149  | 0.95389 | 10.164  | 0.95532 | -0.0057900 | -0.0095600 |
| 200.169.375.000.000 | 0.82526 | 0.93595   | 0.825851142406464 | 0.93655   | 0.045200 | -0.0059900 | 20017 | 10.126  | 0.96051 | 10.141  | 0.96201 | -0.0083700 | -0.0094200 |
| 200.171.503.906.250 | 0.83337 | 0.96030   | 0.833978116512299 | 0.96091   | 0.039700 | -0.019300  | 20017 | 10.105  | 0.96469 | 10.120  | 0.96624 | -0.010800  | -0.0071300 |

|                     |         |         |                     |         |           |             |       |         |         |         |         |            |             |
|---------------------|---------|---------|---------------------|---------|-----------|-------------|-------|---------|---------|---------|---------|------------|-------------|
| 200.174.707.031.250 | 0.84640 | 0.99349 | 0.847039222717285   | 0.99413 | 0.034900  | -0.0087800  | 20017 | 10.069  | 0.97074 | 10.085  | 0.97235 | -0.012200  | -0.0045400  |
| 200.177.929.687.500 | 0.85581 | 10.226  | 0.856477141380310   | 10.232  | 0.034000  | 0.0065800   | 20018 | 10.027  | 0.97647 | 10.043  | 0.97815 | -0.013700  | -0.0037900  |
| 200.181.132.812.500 | 0.86824 | 10.476  | 0.868934690952301   | 10.483  | 0.039100  | 0.0051700   | 20018 | 0.99805 | 0.98184 | 0.99980 | 0.98359 | -0.014600  | -0.0014600  |
| 200.184.335.937.500 | 0.88090 | 10.690  | 0.881613016128540   | 10.697  | 0.037300  | -0.0035100  | 20018 | 0.99330 | 0.98691 | 0.99512 | 0.98873 | -0.014700  | 5.63E-02    |
| 200.187.539.062.500 | 0.89218 | 10.870  | 0.892921566963196   | 10.878  | 0.036900  | -0.0076300  | 20019 | 0.98865 | 0.99165 | 0.99054 | 0.99354 | -0.014600  | 0.0019300   |
| 200.189.687.500.000 | 0.90063 | 10.974  | 0.901389479637146   | 10.982  | 0.033300  | -0.014600   | 20019 | 0.98549 | 0.99467 | 0.98742 | 0.99661 | -0.013600  | 0.0043300   |
| 200.192.890.625.000 | 0.90997 | 11.105  | 0.910757482051849   | 11.112  | 0.029100  | -0.0099400  | 20019 | 0.98136 | 0.99892 | 0.98337 | 10.009  | -0.012300  | 0.0046500   |
| 200.196.113.281.250 | 0.91930 | 11.209  | 0.920111119747162   | 11.217  | 0.026900  | 0.0016900   | 20020 | 0.97760 | 10.029  | 0.97968 | 10.050  | -0.010600  | 0.0044600   |
| 200.199.316.406.250 | 0.92725 | 11.290  | 0.928092062473297   | 11.298  | 0.030200  | 0.0029700   | 20020 | 0.97452 | 10.066  | 0.97666 | 10.088  | -0.0094100 | 0.0036800   |
| 200.202.519.531.250 | 0.93864 | 11.349  | 0.939498901367188   | 11.358  | 0.028800  | -0.0056200  | 20020 | 0.97157 | 10.101  | 0.97378 | 10.123  | -0.0082800 | 0.0045000   |
| 200.205.722.656.250 | 0.94567 | 11.391  | 0.946562230587006   | 11.400  | 0.026600  | 0.00096700  | 20021 | 0.96922 | 10.132  | 0.97150 | 10.155  | -0.0065300 | 0.0070000   |
| 200.207.871.093.750 | 0.95285 | 11.410  | 0.953757762908936   | 11.419  | 0.029300  | -0.014600   | 20021 | 0.96808 | 10.152  | 0.97041 | 10.176  | -0.0045400 | 0.0060400   |
| 200.211.074.218.750 | 0.96135 | 11.427  | 0.962278723716736   | 11.436  | 0.018700  | -0.018600   | 20021 | 0.96679 | 10.180  | 0.96919 | 10.204  | -0.0033000 | 0.0044200   |
| 200.214.277.343.750 | 0.96486 | 11.433  | 0.965818345546722   | 11.443  | 0.017400  | 0.0096800   | 20021 | 0.96597 | 10.206  | 0.96843 | 10.230  | -0.0017000 | 0.0054200   |
| 200.217.500.000.000 | 0.97253 | 11.431  | 0.973514616489410   | 11.441  | 0.025000  | 0.018600    | 20022 | 0.96570 | 10.229  | 0.96823 | 10.254  | 0.00018900 | 0.0048600   |
| 200.220.703.125.000 | 0.98089 | 11.424  | 0.981895327568054   | 11.434  | 0.029300  | -0.018400   | 20022 | 0.96609 | 10.250  | 0.96869 | 10.276  | 0.0014200  | 0.0047800   |
| 200.222.851.562.500 | 0.98823 | 11.417  | 0.989256858825684   | 11.427  | 0.015100  | -0.026600   | 20022 | 0.96646 | 10.263  | 0.96911 | 10.289  | 0.0027500  | 0.0046300   |
| 200.226.054.687.500 | 0.98898 | 11.407  | 0.990027308464050   | 11.417  | 0.015100  | 0.0083600   | 20023 | 0.96756 | 10.281  | 0.97027 | 10.308  | 0.0039000  | 0.0033200   |
| 200.229.257.812.500 | 0.99791 | 11.396  | 0.998983681201935   | 11.407  | 0.020500  | -6.60E-01   | 20023 | 0.96896 | 10.296  | 0.97174 | 10.324  | 0.0048800  | 0.0028100   |
| 200.232.480.468.750 | 10.021  | 11.385  | 100.324.642.658.234 | 11.396  | 0.015100  | -0.0049000  | 20023 | 0.97069 | 10.310  | 0.97355 | 10.339  | 0.0057100  | 0.0023100   |
| 200.235.683.593.750 | 10.076  | 11.374  | 100.869.810.581.207 | 11.386  | 0.017300  | 0.0050800   | 20024 | 0.97262 | 10.323  | 0.97555 | 10.352  | 0.0063600  | 0.0017400   |
| 200.238.886.718.750 | 10.133  | 11.364  | 101.440.954.208.374 | 11.375  | 0.018300  | -0.0016400  | 20024 | 0.97477 | 10.333  | 0.97776 | 10.363  | 0.0068300  | 0.0012100   |
| 200.241.035.156.250 | 10.174  | 11.357  | 101.855.218.410.492 | 11.368  | 0.016500  | -0.0095700  | 20024 | 0.97628 | 10.340  | 0.97932 | 10.370  | 0.0070100  | 0.00042600  |
| 200.244.238.281.250 | 10.221  | 11.346  | 102.325.665.950.775 | 11.358  | 0.013200  | -0.011300   | 20024 | 0.97852 | 10.348  | 0.98163 | 10.379  | 0.0070600  | -0.00015400 |
| 200.247.460.937.500 | 10.259  | 11.335  | 102.706.658.840.179 | 11.347  | 0.0092000 | 0.0043400   | 20025 | 0.98081 | 10.355  | 0.98399 | 10.386  | 0.0069100  | -0.00055900 |
| 200.250.664.062.500 | 10.280  | 11.324  | 102.921.497.821.808 | 11.337  | 0.016000  | 0.017900    | 20025 | 0.98295 | 10.360  | 0.98620 | 10.393  | 0.0067000  | -0.00071900 |
| 200.253.867.187.500 | 10.361  | 11.314  | 103.735.184.669.495 | 11.326  | 0.020700  | 0.0088800   | 20025 | 0.98510 | 10.364  | 0.98842 | 10.398  | 0.0064500  | -0.00087300 |
| 200.257.089.843.750 | 10.413  | 11.303  | 104.256.391.525.269 | 11.316  | 0.021700  | -0.0062200  | 20026 | 0.98710 | 10.368  | 0.99049 | 10.402  | 0.0061300  | -0.0018700  |
| 200.259.218.750.000 | 10.477  | 11.296  | 104.898.917.675.018 | 11.309  | 0.017400  | -0.017400   | 20026 | 0.98839 | 10.369  | 0.99182 | 10.404  | 0.0054500  | -0.0023300  |
| 200.262.441.406.250 | 10.506  | 11.285  | 105.189.073.085.785 | 11.298  | 0.012400  | -0.0069100  | 20026 | 0.99002 | 10.371  | 0.99352 | 10.406  | 0.0048900  | -0.0015500  |
| 200.265.644.531.250 | 10.556  | 11.275  | 105.698.478.221.893 | 11.288  | 0.012900  | 0.0039300   | 20027 | 0.99152 | 10.372  | 0.99509 | 10.407  | 0.0044600  | -0.0021400  |
| 200.268.847.656.250 | 10.588  | 11.264  | 106.022.357.940.674 | 11.278  | 0.014900  | 0.019600    | 20027 | 0.99287 | 10.371  | 0.99651 | 10.408  | 0.0035200  | -0.0020400  |
| 200.272.070.312.500 | 10.652  | 11.253  | 106.661.391.258.240 | 11.267  | 0.025500  | -0.00026400 | 20027 | 0.99379 | 10.371  | 0.99750 | 10.408  | 0.0031400  | -0.0016300  |
| 200.274.199.218.750 | 10.725  | 11.246  | 107.392.036.914.825 | 11.260  | 0.014800  | -0.034200   | 20027 | 0.99456 | 10.370  | 0.99831 | 10.407  | 0.0026500  | -0.0019200  |
| 200.277.421.875.000 | 10.731  | 11.235  | 107.454.967.498.779 | 11.250  | 0.0072200 | -0.0033200  | 20028 | 0.99520 | 10.368  | 0.99903 | 10.406  | 0.0021200  | -0.0011600  |

|                     |        |        |                     |        |             |            |       |         |        |         |        |           |             |
|---------------------|--------|--------|---------------------|--------|-------------|------------|-------|---------|--------|---------|--------|-----------|-------------|
| 200.280.625.000.000 | 10.771 | 11.225 | 107.861.161.231.995 | 11.239 | 0.012600    | 0.017700   | 20028 | 0.99592 | 10.366 | 0.99981 | 10.405 | 0.0019000 | -0.00090100 |
| 200.283.847.656.250 | 10.812 | 11.214 | 108.271.574.974.060 | 11.229 | 0.018600    | 0.0046500  | 20028 | 0.99643 | 10.364 | 10.004  | 10.403 | 0.0015400 | -0.00066300 |
| 200.287.050.781.250 | 10.891 | 11.203 | 109.058.201.313.019 | 11.218 | 0.015600    | -0.012800  | 20029 | 0.99690 | 10.361 | 10.009  | 10.401 | 0.0014800 | -0.00043900 |
| 200.290.253.906.250 | 10.912 | 11.193 | 109.275.329.113.007 | 11.208 | 0.010400    | -0.018400  | 20029 | 0.99737 | 10.358 | 10.015  | 10.399 | 0.0012600 | -0.00052000 |
| 200.292.402.343.750 | 10.946 | 11.185 | 109.618.365.764.618 | 11.201 | 0.0057500   | -0.0075000 | 20029 | 0.99758 | 10.356 | 10.017  | 10.397 | 0.0012000 | 0.00012900  |
| 200.295.605.468.750 | 10.943 | 11.175 | 109.587.264.060.974 | 11.190 | 0.0063800   | 0.013500   | 20030 | 0.99801 | 10.353 | 10.022  | 10.395 | 0.0013300 | 0.00017800  |
| 200.298.828.125.000 | 10.987 | 11.164 | 110.033.071.041.107 | 11.180 | 0.014400    | 0.010300   | 20030 | 0.99843 | 10.350 | 10.027  | 10.393 | 0.0013100 | 0.00036700  |
| 200.302.031.250.000 | 11.036 | 11.153 | 110.517.299.175.262 | 11.170 | 0.013000    | -0.0067900 | 20030 | 0.99886 | 10.347 | 10.032  | 10.390 | 0.0015600 | 0.00080100  |
| 200.305.253.906.250 | 11.071 | 11.143 | 110.873.055.458.069 | 11.159 | 0.010100    | -0.012300  | 20031 | 0.99943 | 10.344 | 10.039  | 10.388 | 0.0018300 | 0.0011100   |
| 200.307.382.812.500 | 11.089 | 11.136 | 111.059.212.684.631 | 11.152 | 0.0064200   | 0.0032500  | 20031 | 0.99983 | 10.342 | 10.043  | 10.387 | 0.0021600 | 0.0019300   |
| 200.310.605.468.750 | 11.105 | 11.125 | 111.221.027.374.268 | 11.142 | 0.011800    | 0.011400   | 20031 | 10.006  | 10.339 | 10.051  | 10.385 | 0.0028600 | 0.0017900   |
| 200.313.808.593.750 | 11.165 | 11.114 | 111.822.485.923.767 | 11.132 | 0.013700    | -0.010800  | 20031 | 10.017  | 10.336 | 10.063  | 10.382 | 0.0033100 | 0.0013300   |
| 200.317.031.250.000 | 11.193 | 11.104 | 112.106.513.977.051 | 11.121 | 0.0048700   | -0.012400  | 20032 | 10.027  | 10.334 | 10.074  | 10.380 | 0.0037200 | 0.0012700   |
| 200.320.234.375.000 | 11.196 | 11.093 | 112.139.642.238.617 | 11.111 | 0.0057800   | -0.0023900 | 20032 | 10.041  | 10.331 | 10.088  | 10.378 | 0.0041200 | 0.0013200   |
| 200.323.457.031.250 | 11.231 | 11.083 | 112.482.535.839.081 | 11.100 | 0.0033300   | 0.0016700  | 20032 | 10.054  | 10.328 | 10.102  | 10.376 | 0.0045600 | 0.0017800   |
| 200.327.734.375.000 | 11.221 | 11.069 | 112.395.000.457.764 | 11.087 | 0.0070300   | 0.0033300  | 20033 | 10.075  | 10.324 | 10.124  | 10.373 | 0.0054600 | 0.0026000   |
| 200.330.957.031.250 | 11.283 | 11.058 | 113.015.103.340.149 | 11.076 | 0.0058300   | -0.0038100 | 20033 | 10.095  | 10.321 | 10.144  | 10.371 | 0.0065200 | 0.0018200   |
| 200.335.234.375.000 | 11.265 | 11.044 | 112.837.481.498.718 | 11.063 | 0.0041700   | 0.0010800  | 20034 | 10.124  | 10.318 | 10.174  | 10.368 | 0.0068200 | 0.00093300  |
| 200.339.511.718.750 | 11.319 | 11.030 | 113.377.642.631.531 | 11.049 | 0.0067500   | -0.0022800 | 20034 | 10.153  | 10.314 | 10.204  | 10.366 | 0.0073100 | 0.0013500   |
| 200.343.808.593.750 | 11.323 | 11.016 | 113.422.834.873.199 | 11.035 | 0.0022100   | -0.0053900 | 20034 | 10.186  | 10.311 | 10.239  | 10.363 | 0.0079800 | 0.0014500   |
| 200.348.085.937.500 | 11.338 | 11.002 | 113.573.265.075.684 | 11.022 | 0.0021300   | -0.0022400 | 20035 | 10.221  | 10.307 | 10.275  | 10.361 | 0.0085600 | 0.0013300   |
| 200.352.363.281.250 | 11.341 | 10.989 | 113.610.887.527.466 | 11.008 | 0.00029800  | 0.0021200  | 20035 | 10.260  | 10.304 | 10.314  | 10.358 | 0.0091100 | 0.00099400  |
| 200.356.660.156.250 | 11.340 | 10.975 | 113.604.664.802.551 | 10.995 | 0.0039500   | -0.0021500 | 20036 | 10.299  | 10.300 | 10.355  | 10.355 | 0.0094100 | 0.00060500  |
| 200.360.937.500.000 | 11.375 | 10.961 | 113.955.771.923.065 | 10.981 | -0.0015500  | -0.0096500 | 20036 | 10.340  | 10.297 | 10.397  | 10.353 | 0.0096300 | 0.00061000  |
| 200.365.234.375.000 | 11.327 | 10.947 | 113.477.909.564.972 | 10.968 | -0.0043200  | 0.0054000  | 20037 | 10.382  | 10.293 | 10.439  | 10.350 | 0.0099300 | 0.00041500  |
| 200.369.511.718.750 | 11.338 | 10.934 | 113.591.265.678.406 | 10.955 | 0.0030800   | 0.0054000  | 20037 | 10.426  | 10.290 | 10.484  | 10.348 | 0.0099900 | 0.00044000  |
| 200.373.789.062.500 | 11.354 | 10.920 | 113.747.680.187.225 | 10.941 | 0.00029900  | -0.0073100 | 20037 | 10.468  | 10.287 | 10.526  | 10.346 | 0.010300  | 0.0010000   |
| 200.379.160.156.250 | 11.341 | 10.903 | 113.626.575.469.971 | 10.925 | -0.0039700  | 2.02E-01   | 20038 | 10.525  | 10.283 | 10.585  | 10.343 | 0.011000  | 0.00076200  |
| 200.383.437.500.000 | 11.315 | 10.890 | 113.370.633.125.305 | 10.912 | 0.00031900  | 0.0049600  | 20038 | 10.573  | 10.279 | 10.634  | 10.340 | 0.011000  | 8.35E-03    |
| 200.387.734.375.000 | 11.344 | 10.876 | 113.659.560.680.389 | 10.898 | 0.00028000  | -0.0020800 | 20039 | 10.620  | 10.276 | 10.682  | 10.338 | 0.011000  | -9.04E-01   |
| 200.393.085.937.500 | 11.318 | 10.860 | 113.404.023.647.308 | 10.882 | -0.0016900  | -0.0034300 | 20039 | 10.679  | 10.272 | 10.742  | 10.335 | 0.011000  | -0.00013000 |
| 200.398.437.500.000 | 11.326 | 10.843 | 113.485.419.750.214 | 10.866 | -0.0033900  | -0.0060800 | 20040 | 10.737  | 10.268 | 10.801  | 10.333 | 0.010800  | -0.00072200 |
| 200.402.734.375.000 | 11.285 | 10.830 | 113.083.219.528.198 | 10.853 | -0.0075500  | 0.0016600  | 20040 | 10.783  | 10.265 | 10.848  | 10.330 | 0.010300  | -0.0016400  |
| 200.408.085.937.500 | 11.253 | 10.813 | 112.762.928.009.033 | 10.837 | -0.0017900  | 0.0068000  | 20041 | 10.836  | 10.262 | 10.902  | 10.328 | 0.0092400 | -0.0020000  |
| 200.413.437.500.000 | 11.266 | 10.797 | 112.898.027.896.881 | 10.821 | -0.00026400 | -0.0037600 | 20041 | 10.882  | 10.258 | 10.950  | 10.325 | 0.0081300 | -0.0022600  |

|                     |        |        |                     |        |            |             |       |         |        |         |        |             |             |
|---------------------|--------|--------|---------------------|--------|------------|-------------|-------|---------|--------|---------|--------|-------------|-------------|
| 200.418.808.593.750 | 11.250 | 10.781 | 112.741.434.574.127 | 10.805 | -0.0058300 | -0.0031100  | 20042 | 10.923  | 10.254 | 10.992  | 10.323 | 0.0068100   | -0.0032900  |
| 200.423.085.937.500 | 11.210 | 10.768 | 112.341.821.193.695 | 10.792 | -0.0032600 | 0.0049800   | 20042 | 10.948  | 10.251 | 11.017  | 10.321 | 0.0049500   | -0.0042500  |
| 200.428.457.031.250 | 11.219 | 10.752 | 112.432.503.700.256 | 10.777 | -0.0010300 | -0.0024800  | 20043 | 10.971  | 10.247 | 11.042  | 10.318 | 0.0027100   | -0.0046700  |
| 200.433.808.593.750 | 11.199 | 10.736 | 112.238.585.948.944 | 10.761 | -0.0059200 | -0.0044400  | 20043 | 10.977  | 10.244 | 11.049  | 10.316 | -5,79E-01   | -0.0042700  |
| 200.440.253.906.250 | 11.149 | 10.717 | 111.741.590.499.878 | 10.743 | -0.0062500 | 0.0032900   | 20044 | 10.970  | 10.240 | 11.043  | 10.313 | -0.0023200  | -0.0044400  |
| 200.445.605.468.750 | 11.125 | 10.702 | 111.507.844.924.927 | 10.728 | -0.0020400 | 0.0033400   | 20045 | 10.950  | 10.236 | 11.024  | 10.310 | -0.0053000  | -0.0050800  |
| 200.450.976.562.500 | 11.127 | 10.686 | 111.529.672.145.844 | 10.712 | -0.0026700 | -0.00053100 | 20045 | 10.913  | 10.233 | 10.989  | 10.308 | -0.0077800  | -0.0045700  |
| 200.456.328.125.000 | 11.096 | 10.671 | 111.228.132.247.925 | 10.697 | -0.0026100 | 0.00030500  | 20046 | 10.866  | 10.229 | 10.943  | 10.306 | -0.010200   | -0.0036900  |
| 200.462.753.906.250 | 11.096 | 10.653 | 111.230.123.043.060 | 10.680 | -0.0023100 | -0.0021800  | 20046 | 10.793  | 10.225 | 10.871  | 10.303 | -0.012100   | -0.0026600  |
| 200.468.125.000.000 | 11.069 | 10.638 | 110.962.557.792.664 | 10.665 | -0.0051700 | -0.0023800  | 20047 | 10.723  | 10.222 | 10.802  | 10.301 | -0.013300   | -0.0021900  |
| 200.473.496.093.750 | 11.041 | 10.623 | 110.680.174.827.576 | 10.650 | -0.0048700 | 0.00074900  | 20047 | 10.650  | 10.219 | 10.730  | 10.299 | -0.014500   | -0.0015800  |
| 200.479.921.875.000 | 11.012 | 10.605 | 110.394.871.234.894 | 10.633 | -0.0042900 | 0.0015200   | 20048 | 10.553  | 10.215 | 10.634  | 10.296 | -0.015200   | -0.00059700 |
| 200.486.367.187.500 | 10.985 | 10.588 | 110.135.316.848.755 | 10.616 | -0.0029100 | -0.00062800 | 20049 | 10.454  | 10.211 | 10.537  | 10.294 | -0.015200   | 0.00032600  |
| 200.491.718.750.000 | 10.977 | 10.574 | 110.058.045.387.268 | 10.602 | -0.0050300 | -0.0025700  | 20049 | 10.373  | 10.208 | 10.457  | 10.292 | -0.014800   | 0.00091400  |
| 200.498.164.062.500 | 10.926 | 10.557 | 109.548.771.381.378 | 10.586 | -0.0059400 | 0.00044900  | 20050 | 10.280  | 10.204 | 10.365  | 10.290 | -0.014200   | 0.0012300   |
| 200.504.589.843.750 | 10.901 | 10.540 | 109.300.744.533.539 | 10.569 | -0.0044500 | -0.00088400 | 20050 | 10.191  | 10.201 | 10.277  | 10.288 | -0.013200   | 0.0019100   |
| 200.511.035.156.250 | 10.869 | 10.524 | 108.982.348.442.078 | 10.553 | -0.0070800 | -0.0020000  | 20051 | 10.109  | 10.197 | 10.197  | 10.285 | -0.011700   | 0.0024700   |
| 200.517.460.937.500 | 10.810 | 10.508 | 108.396.875.858.307 | 10.538 | -0.0070300 | 0.0012200   | 20052 | 10.040  | 10.194 | 10.130  | 10.283 | -0.010100   | 0.0024500   |
| 200.523.906.250.000 | 10.778 | 10.492 | 108.085.131.645.203 | 10.522 | -0.0055100 | -0.00048900 | 20052 | 0.99797 | 10.190 | 10.071  | 10.281 | -0.0085500  | 0.0025000   |
| 200.530.351.562.500 | 10.739 | 10.476 | 107.693.135.738.373 | 10.507 | -0.0076600 | -0.0016200  | 20053 | 0.99299 | 10.187 | 10.022  | 10.279 | -0.0068400  | 0.0026700   |
| 200.536.777.343.750 | 10.680 | 10.461 | 107.106.614.112.854 | 10.492 | -0.0076000 | 0.0010100   | 20054 | 0.98916 | 10.183 | 0.99852 | 10.277 | -0.0051100  | 0.0025900   |
| 200.543.222.656.250 | 10.641 | 10.446 | 106.721.866.130.829 | 10.477 | -0.0063600 | 0.0016800   | 20054 | 0.98641 | 10.180 | 0.99591 | 10.275 | -0.0035100  | 0.0024500   |
| 200.549.667.968.750 | 10.598 | 10.431 | 106.293.678.283.691 | 10.463 | -0.0054300 | -0.00041400 | 20055 | 0.98464 | 10.177 | 0.99428 | 10.273 | -0.0019600  | 0.0021100   |
| 200.557.167.968.750 | 10.565 | 10.414 | 105.971.181.392.670 | 10.446 | -0.0069400 | -0.0019000  | 20056 | 0.98368 | 10.173 | 0.99348 | 10.271 | -0.00056200 | 0.0020300   |
| 200.563.613.281.250 | 10.501 | 10.400 | 105.333.769.321.442 | 10.433 | -0.0080800 | -3,62E-01   | 20056 | 0.98386 | 10.170 | 0.99379 | 10.269 | 0.00087600  | 0.0020100   |
| 200.570.058.593.750 | 10.461 | 10.386 | 104.935.705.661.774 | 10.419 | -0.0069800 | -0.00042200 | 20057 | 0.98481 | 10.167 | 0.99488 | 10.267 | 0.0020200   | 0.0014200   |
| 200.577.578.125.000 | 10.403 | 10.371 | 104.365.122.318.268 | 10.404 | -0.0086700 | -1,60E-01   | 20058 | 0.98669 | 10.163 | 0.99692 | 10.265 | 0.0028600   | 0.0012100   |
| 200.584.023.437.500 | 10.340 | 10.358 | 103.731.894.493.103 | 10.391 | -0.0070100 | 0.0042700   | 20058 | 0.98881 | 10.160 | 0.99918 | 10.264 | 0.0037100   | 0.00097800  |
| 200.591.523.437.500 | 10.306 | 10.343 | 103.395.283.222.198 | 10.377 | -0.0027200 | 0.0025100   | 20059 | 0.99186 | 10.157 | 10.024  | 10.262 | 0.0042300   | 0.00043400  |
| 200.599.042.968.750 | 10.299 | 10.329 | 103.330.564.498.901 | 10.363 | -0.0032300 | -0.0013100  | 20060 | 0.99516 | 10.153 | 10.058  | 10.260 | 0.0043600   | -7,78E-01   |
| 200.605.488.281.250 | 10.261 | 10.317 | 102.950.596.809.387 | 10.351 | -0.0045500 | -0.0018200  | 20061 | 0.99795 | 10.150 | 10.088  | 10.259 | 0.0041200   | -0.00045500 |
| 200.613.007.812.500 | 10.235 | 10.303 | 102.702.295.780.182 | 10.338 | -0.0057800 | -0.0010100  | 20061 | 10.009  | 10.147 | 10.119  | 10.257 | 0.0037200   | -0.00060800 |
| 200.620.527.343.750 | 10.174 | 10.290 | 102.088.916.301.727 | 10.325 | -0.0060700 | 0.0012400   | 20062 | 10.035  | 10.144 | 10.147  | 10.255 | 0.0032000   | -0.00076200 |
| 200.628.046.875.000 | 10.144 | 10.278 | 101.796.936.988.831 | 10.313 | -0.0039000 | 0.0013700   | 20063 | 10.057  | 10.140 | 10.170  | 10.253 | 0.0025800   | -0.00098100 |
| 200.635.566.406.250 | 10.115 | 10.266 | 101.508.653.163.910 | 10.302 | -0.0040100 | 0.00048500  | 20064 | 10.074  | 10.137 | 10.189  | 10.252 | 0.0017300   | -0.0012500  |



|                     |         |        |                     |        |             |             |       |         |        |         |        |             |             |
|---------------------|---------|--------|---------------------|--------|-------------|-------------|-------|---------|--------|---------|--------|-------------|-------------|
| 200.643.085.937.500 | 10.084  | 10.254 | 101.201.057.434.082 | 10.290 | -0.0031700  | 0.0012500   | 20064 | 10.083  | 10.134 | 10.199  | 10.250 | 0.00069400  | -0.0013600  |
| 200.650.605.468.750 | 10.067  | 10.243 | 101.037.991.046.906 | 10.279 | -0.0021300  | 0.0011400   | 20065 | 10.085  | 10.131 | 10.202  | 10.249 | -0.00031300 | -0.0010900  |
| 200.659.199.218.750 | 10.049  | 10.231 | 100.864.434.242.249 | 10.268 | -0.0013400  | -3.69E-01   | 20066 | 10.078  | 10.127 | 10.198  | 10.247 | -0.0010600  | -0.00082200 |
| 200.666.718.750.000 | 10.046  | 10.220 | 100.828.874.111.176 | 10.258 | -0.0021900  | 7.52E-01    | 20067 | 10.068  | 10.124 | 10.189  | 10.246 | -0.0016400  | -0.00081500 |
| 200.674.238.281.250 | 10.016  | 10.210 | 100.541.055.202.484 | 10.248 | -0.0012300  | 0.0012100   | 20067 | 10.054  | 10.121 | 10.176  | 10.244 | -0.0022800  | -0.00068600 |
| 200.682.851.562.500 | 10.026  | 10.200 | 100.637.531.280.518 | 10.238 | -0.00023500 | -0.00057800 | 20068 | 10.031  | 10.118 | 10.155  | 10.243 | -0.0027400  | -0.00043400 |
| 200.690.371.093.750 | 10.013  | 10.191 | 100.509.977.340.698 | 10.229 | -0.0021600  | 0.0010700   | 20069 | 10.009  | 10.115 | 10.136  | 10.241 | -0.0029800  | -0.00031500 |
| 200.697.890.625.000 | 0.99932 | 10.182 | 100.318.717.956.543 | 10.221 | 0.0013800   | 0.0023800   | 20070 | 0.99860 | 10.112 | 10.114  | 10.240 | -0.0032200  | -0.00018000 |
| 200.706.484.375.000 | 10.035  | 10.173 | 100.739.145.278.931 | 10.212 | 0.0016800   | -0.0019500  | 20071 | 0.99575 | 10.109 | 10.087  | 10.239 | -0.0032700  | 2.18E-01    |
| 200.715.097.656.250 | 10.022  | 10.164 | 100.614.237.785.339 | 10.203 | -0.0019700  | -0.0027800  | 20072 | 0.99297 | 10.106 | 10.061  | 10.237 | -0.0031800  | 0.00027300  |
| 200.722.617.187.500 | 10.003  | 10.156 | 100.428.211.688.995 | 10.196 | -0.0028100  | 0.0013900   | 20072 | 0.99062 | 10.103 | 10.039  | 10.236 | -0.0028300  | 0.00053000  |
| 200.731.210.937.500 | 0.99768 | 10.148 | 100.168.490.409.851 | 10.188 | 0.00026700  | 0.0026100   | 20073 | 0.98841 | 10.100 | 10.019  | 10.235 | -0.0023300  | 0.00066900  |
| 200.739.824.218.750 | 10.008  | 10.141 | 100.480.818.748.474 | 10.181 | 0.0016900   | -0.00030800 | 20074 | 0.98661 | 10.097 | 10.003  | 10.233 | -0.0016800  | 0.00087700  |
| 200.748.417.968.750 | 10.006  | 10.134 | 100.465.214.252.472 | 10.174 | -0.00026300 | -0.00091100 | 20075 | 0.98551 | 10.093 | 0.99936 | 10.232 | -0.00081700 | 0.0011200   |
| 200.757.031.250.000 | 10.003  | 10.127 | 100.442.016.124.725 | 10.168 | 0.00011800  | 0.00017700  | 20076 | 0.98521 | 10.090 | 0.99923 | 10.231 | 0.00024400  | 0.0014100   |
| 200.765.625.000.000 | 10.008  | 10.121 | 100.491.893.291.473 | 10.162 | 4.15E-01    | 0.00015900  | 20077 | 0.98593 | 10.087 | 10.001  | 10.229 | 0.0016100   | 0.0015900   |
| 200.774.238.281.250 | 10.004  | 10.115 | 100.455.319.881.439 | 10.157 | 0.00039300  | -0.00018900 | 20077 | 0.98797 | 10.084 | 10.024  | 10.228 | 0.0029900   | 0.0015600   |
| 200.782.851.562.500 | 10.015  | 10.110 | 100.565.552.711.487 | 10.152 | -0.00028400 | -0.0016300  | 20078 | 0.99108 | 10.081 | 10.056  | 10.227 | 0.0042900   | 0.0015500   |
| 200.791.445.312.500 | 0.99991 | 10.105 | 100.412.392.616.272 | 10.147 | -0.0024100  | 0.00054000  | 20079 | 0.99536 | 10.078 | 10.101  | 10.226 | 0.0056500   | 0.0013000   |
| 200.801.132.812.500 | 0.99705 | 10.100 | 100.130.355.358.124 | 10.142 | 0.00070300  | 0.0029200   | 20080 | 10.014  | 10.075 | 10.164  | 10.224 | 0.0066700   | 0.00091900  |
| 200.809.746.093.750 | 10.012  | 10.096 | 100.547.075.271.606 | 10.139 | 0.0029200   | -0.00028100 | 20081 | 10.076  | 10.072 | 10.227  | 10.223 | 0.0073400   | 0.00057500  |
| 200.818.359.375.000 | 10.021  | 10.092 | 100.639.212.131.500 | 10.135 | 0.00021900  | -0.0023300  | 20082 | 10.141  | 10.069 | 10.294  | 10.222 | 0.0076600   | 0.00011500  |
| 200.828.046.875.000 | 10.016  | 10.088 | 100.592.923.164.368 | 10.132 | -0.0013400  | -0.0010300  | 20083 | 10.216  | 10.065 | 10.371  | 10.220 | 0.0075500   | -0.00045400 |
| 200.836.660.156.250 | 0.99963 | 10.085 | 100.399.100.780.487 | 10.129 | -0.0016600  | -0.00040600 | 20084 | 10.279  | 10.062 | 10.436  | 10.219 | 0.0068300   | -0.00095300 |
| 200.846.347.656.250 | 0.99855 | 10.082 | 100.293.910.503.387 | 10.126 | -0.0020900  | 0.0019100   | 20085 | 10.341  | 10.059 | 10.500  | 10.218 | 0.0058000   | -0.0012500  |
| 200.856.035.156.250 | 0.99559 | 10.080 | 100.000.667.572.021 | 10.124 | 0.0020300   | 0.0023200   | 20086 | 10.391  | 10.055 | 10.552  | 10.216 | 0.0044200   | -0.0017800  |
| 200.864.648.437.500 | 10.023  | 10.078 | 100.670.325.756.073 | 10.122 | 0.0021700   | -0.0018600  | 20086 | 10.422  | 10.052 | 10.585  | 10.215 | 0.0025500   | -0.0021300  |
| 200.874.335.937.500 | 0.99955 | 10.076 | 100.402.092.933.655 | 10.121 | -0.0013700  | -0.0024000  | 20087 | 10.438  | 10.049 | 10.603  | 10.214 | 0.00052000  | -0.0021600  |
| 200.884.023.437.500 | 0.99961 | 10.075 | 100.410.687.923.431 | 10.120 | -0.0024800  | -0.00058100 | 20088 | 10.432  | 10.045 | 10.599  | 10.212 | -0.0016400  | -0.0021600  |
| 200.893.710.937.500 | 0.99474 | 10.073 | 0.999261617660522   | 10.119 | -0.0024900  | 0.00091400  | 20089 | 10.406  | 10.042 | 10.575  | 10.211 | -0.0036700  | -0.0020100  |
| 200.903.417.968.750 | 0.99477 | 10.073 | 0.999318718910217   | 10.118 | -0.00071000 | 0.0013800   | 20090 | 10.361  | 10.038 | 10.532  | 10.209 | -0.0055300  | -0.0017500  |
| 200.913.105.468.750 | 0.99336 | 10.072 | 0.997933030128479   | 10.118 | 0.00018700  | 0.00062300  | 20091 | 10.299  | 10.035 | 10.472  | 10.208 | -0.0070700  | -0.0012500  |
| 200.922.792.968.750 | 0.99513 | 10.072 | 0.999727904796600   | 10.118 | 0.00049700  | -6.46E-01   | 20092 | 10.224  | 10.031 | 10.399  | 10.206 | -0.0079500  | -0.00065700 |
| 200.932.500.000.000 | 0.99433 | 10.072 | 0.998942911624908   | 10.119 | 6.18E-01    | -0.00048100 | 20093 | 10.144  | 10.027 | 10.322  | 10.204 | -0.0083400  | -0.00013300 |
| 200.942.187.500.000 | 0.99525 | 10.073 | 0.999891698360443   | 10.119 | -0.00043500 | -0.00036300 | 20094 | 10.062  | 10.024 | 10.241  | 10.203 | -0.0082100  | 0.00042600  |

|                     |         |        |                     |        |             |             |       |         |         |         |        |             |             |
|---------------------|---------|--------|---------------------|--------|-------------|-------------|-------|---------|---------|---------|--------|-------------|-------------|
| 200.952.968.750.000 | 0.99344 | 10.074 | 0.998097002506256   | 10.120 | -0.00068100 | 8,57E-01    | 20095 | 0.99763 | 10.020  | 10.158  | 10.201 | -0.0074700  | 0.00096000  |
| 200.962.675.781.250 | 0.99386 | 10.075 | 0.998539745807648   | 10.122 | -0.00026000 | 0.00099700  | 20096 | 0.99089 | 10.016  | 10.092  | 10.199 | -0.0062400  | 0.0013800   |
| 200.972.382.812.500 | 0.99293 | 10.076 | 0.997632622718811   | 10.123 | 0.0012500   | 0.00092800  | 20097 | 0.98551 | 10.012  | 10.041  | 10.198 | -0.0047900  | 0.0014200   |
| 200.983.144.531.250 | 0.99643 | 10.078 | 100.114.607.810.974 | 10.125 | 0.0016400   | -0.0010700  | 20098 | 0.98109 | 10.008  | 0.99986 | 10.196 | -0.0033300  | 0.0014900   |
| 200.992.851.562.500 | 0.99629 | 10.080 | 100.102.663.040.161 | 10.127 | -0.00094400 | -0.0015200  | 20099 | 0.97869 | 10.005  | 0.99766 | 10.194 | -0.0017500  | 0.0013800   |
| 201.003.632.812.500 | 0.99449 | 10.082 | 0.999247908592224   | 10.129 | -0.0014900  | 0.00017800  | 20100 | 0.97751 | 10.000  | 0.99671 | 10.192 | -0.00050200 | 0.0010300   |
| 201.014.414.062.500 | 0.99309 | 10.084 | 0.997861087322235   | 10.132 | -0.00056100 | 0.00023500  | 20101 | 0.97760 | 0.99962 | 0.99702 | 10.190 | 0.00048500  | 0.00079600  |
| 201.024.121.093.750 | 0.99334 | 10.086 | 0.998132467269897   | 10.134 | -0.0010000  | 0.00041100  | 20102 | 0.97850 | 0.99924 | 0.99813 | 10.189 | 0.0011300   | 0.00047100  |
| 201.034.902.343.750 | 0.99103 | 10.089 | 0.995834648609161   | 10.137 | 0.00028100  | 0.0014300   | 20103 | 0.97992 | 0.99882 | 0.99976 | 10.187 | 0.0014500   | 0.00017800  |
| 201.045.703.125.000 | 0.99395 | 10.092 | 0.998771131038666   | 10.140 | 0.0020700   | 0.00071600  | 20105 | 0.98163 | 0.99840 | 10.017  | 10.185 | 0.0015100   | -4,26E-01   |
| 201.056.484.375.000 | 0.99550 | 10.095 | 100.033.998.489.380 | 10.143 | 0.0018300   | -4,83E-01   | 20106 | 0.98318 | 0.99797 | 10.035  | 10.183 | 0.0013600   | -0.00016500 |
| 201.067.265.625.000 | 0.99789 | 10.098 | 100.273.859.500.885 | 10.147 | 0.0019700   | -0.00043400 | 20107 | 0.98456 | 0.99755 | 10.051  | 10.181 | 0.0011600   | -0.00019900 |
| 201.078.066.406.250 | 0.99976 | 10.101 | 100.461.888.313.293 | 10.150 | 0.00089000  | -0.00020200 | 20108 | 0.98567 | 0.99712 | 10.064  | 10.179 | 0.00092800  | -0.00017300 |
| 201.088.847.656.250 | 0.99981 | 10.105 | 100.468.266.010.284 | 10.153 | 0.0015300   | -0.00018500 | 20109 | 0.98656 | 0.99669 | 10.075  | 10.177 | 0.00078200  | -0.00014500 |
| 201.099.648.437.500 | 10.031  | 10.108 | 100.795.245.170.593 | 10.157 | 0.00048900  | -0.00055100 | 20110 | 0.98736 | 0.99626 | 10.086  | 10.175 | 0.00061500  | -0.00013700 |
| 201.111.523.437.500 | 10.009  | 10.112 | 100.581.383.705.139 | 10.161 | 0.00028500  | 0.00094500  | 20111 | 0.98795 | 0.99578 | 10.094  | 10.172 | 0.00047300  | -5,48E-01   |
| 201.122.324.218.750 | 10.037  | 10.115 | 100.861.752.033.234 | 10.164 | 0.0026300   | 0.00070100  | 20112 | 0.98843 | 0.99534 | 10.101  | 10.170 | 0.00049100  | 6,69E-01    |
| 201.133.105.468.750 | 10.066  | 10.118 | 101.151.132.583.618 | 10.168 | 0.0018000   | -3,95E-01   | 20113 | 0.98901 | 0.99491 | 10.109  | 10.168 | 0.00061700  | 0.00016500  |
| 201.144.980.468.750 | 10.078  | 10.122 | 101.270.759.105.682 | 10.171 | 0.0025400   | 0.00017500  | 20114 | 0.98983 | 0.99443 | 10.120  | 10.166 | 0.00086400  | 0.00023100  |
| 201.155.781.250.000 | 10.124  | 10.125 | 101.728.701.591.492 | 10.175 | 0.0022000   | -0.0011400  | 20116 | 0.99097 | 0.99399 | 10.133  | 10.164 | 0.0011400   | 0.00027500  |
| 201.167.656.250.000 | 10.128  | 10.129 | 101.769.852.638.245 | 10.178 | -5,25E-01   | 1,44E-01    | 20117 | 0.99242 | 0.99351 | 10.150  | 10.161 | 0.0014900   | 0.00035900  |
| 201.178.457.031.250 | 10.122  | 10.132 | 101.717.746.257.782 | 10.181 | 0.0022300   | 0.0013200   | 20118 | 0.99435 | 0.99306 | 10.172  | 10.159 | 0.0019600   | 0.00042700  |
| 201.190.351.562.500 | 10.178  | 10.135 | 102.276.146.411.896 | 10.185 | 0.0029300   | -0.00047600 | 20119 | 0.99686 | 0.99258 | 10.199  | 10.157 | 0.0024600   | 0.00042100  |
| 201.202.226.562.500 | 10.192  | 10.139 | 102.415.513.992.310 | 10.188 | 0.0011000   | -0.00075400 | 20120 | 10.002  | 0.99209 | 10.235  | 10.154 | 0.0029600   | 0.00038700  |
| 201.213.027.343.750 | 10.203  | 10.141 | 102.525.377.273.560 | 10.191 | 0.0012200   | 3,75E-01    | 20121 | 10.036  | 0.99165 | 10.271  | 10.152 | 0.0033300   | 0.00027400  |
| 201.224.921.875.000 | 10.220  | 10.144 | 102.693.021.297.455 | 10.193 | 0.0011800   | 0.00035100  | 20122 | 10.078  | 0.99116 | 10.315  | 10.150 | 0.0035800   | 4,31E-01    |
| 201.236.816.406.250 | 10.231  | 10.147 | 102.806.615.829.468 | 10.196 | 0.0020600   | 0.00029800  | 20124 | 10.121  | 0.99066 | 10.361  | 10.147 | 0.0034400   | -0.00022900 |
| 201.248.691.406.250 | 10.269  | 10.149 | 103.181.958.198.547 | 10.198 | 0.0018900   | -5,18E-01   | 20125 | 10.159  | 0.99017 | 10.402  | 10.145 | 0.0030300   | -0.00039900 |
| 201.260.585.937.500 | 10.276  | 10.151 | 103.255.259.990.692 | 10.200 | 0.0019400   | 1,00E+00    | 20126 | 10.193  | 0.98968 | 10.438  | 10.142 | 0.0024900   | -0.00060000 |
| 201.272.480.468.750 | 10.315  | 10.153 | 103.641.569.614.410 | 10.202 | 0.0021300   | -0.00016600 | 20127 | 10.218  | 0.98919 | 10.466  | 10.140 | 0.0016000   | -0.00084800 |
| 201.284.375.000.000 | 10.327  | 10.155 | 103.760.540.485.382 | 10.204 | 0.0015400   | -5,21E-01   | 20128 | 10.231  | 0.98869 | 10.481  | 10.137 | 0.00047200  | -0.00087100 |
| 201.297.343.750.000 | 10.353  | 10.156 | 104.023.444.652.557 | 10.205 | 0.0020000   | 0.00010300  | 20130 | 10.230  | 0.98816 | 10.483  | 10.134 | -0.00056100 | -0.00085400 |
| 201.309.257.812.500 | 10.377  | 10.157 | 104.256.272.315.979 | 10.206 | 0.0018000   | -0.00020800 | 20131 | 10.217  | 0.98766 | 10.472  | 10.132 | -0.0016500  | -0.00085800 |
| 201.321.152.343.750 | 10.396  | 10.158 | 104.449.832.439.423 | 10.207 | 0.0015000   | -0.00046900 | 20132 | 10.191  | 0.98717 | 10.449  | 10.129 | -0.0026000  | -0.00065600 |
| 201.334.121.093.750 | 10.414  | 10.159 | 104.627.776.145.935 | 10.208 | 0.00063100  | -0.00069500 | 20133 | 10.152  | 0.98663 | 10.413  | 10.127 | -0.0032800  | -0.00050500 |

|                     |         |        |                     |        |             |             |       |         |         |         |        |             |             |
|---------------------|---------|--------|---------------------|--------|-------------|-------------|-------|---------|---------|---------|--------|-------------|-------------|
| 201.346.035.156.250 | 10.412  | 10.160 | 104.604.661.464.691 | 10.209 | -0.00022900 | -0.00034700 | 20135 | 10.109  | 0.98613 | 10.372  | 10.124 | -0.0038600  | -0.00038000 |
| 201.359.003.906.250 | 10.408  | 10.161 | 104.568.445.682.526 | 10.209 | -0.00023200 | 0.00013900  | 20136 | 10.056  | 0.98559 | 10.322  | 10.122 | -0.0042300  | -0.00026400 |
| 201.370.917.968.750 | 10.406  | 10.161 | 104.544.293.880.463 | 10.209 | 0.00011800  | 0.00047800  | 20137 | 10.004  | 0.98510 | 10.272  | 10.119 | -0.0045200  | -0.00025800 |
| 201.383.906.250.000 | 10.411  | 10.161 | 104.594.874.382.019 | 10.209 | 0.00096000  | 0.00021900  | 20138 | 0.99438 | 0.98456 | 10.214  | 10.116 | -0.0048700  | -0.00023800 |
| 201.396.894.531.250 | 10.431  | 10.161 | 104.790.198.802.948 | 10.209 | 0.00068600  | -0.00045700 | 20140 | 0.98773 | 0.98402 | 10.151  | 10.114 | -0.0051300  | -9,40E-01   |
| 201.409.882.812.500 | 10.429  | 10.161 | 104.769.313.335.419 | 10.209 | -0.00022600 | -0.00028500 | 20141 | 0.98104 | 0.98348 | 10.086  | 10.111 | -0.0051200  | 4,57E-01    |
| 201.421.796.875.000 | 10.425  | 10.160 | 104.730.200.767.517 | 10.208 | -2,39E-01   | -0.00087900 | 20142 | 0.97498 | 0.98298 | 10.028  | 10.108 | -0.0050200  | 0.00022400  |
| 201.434.785.156.250 | 10.428  | 10.160 | 104.759.395.122.528 | 10.207 | -0.0024200  | -0.00076200 | 20143 | 0.96853 | 0.98244 | 0.99665 | 10.106 | -0.0045600  | 0.00044600  |
| 201.447.792.968.750 | 10.362  | 10.159 | 104.097.878.932.953 | 10.206 | -0.0020000  | 0.0010700   | 20145 | 0.96313 | 0.98191 | 0.99152 | 10.103 | -0.0038600  | 0.00055400  |
| 201.460.781.250.000 | 10.376  | 10.158 | 104.233.741.760.254 | 10.205 | 0.00036700  | 0.00034800  | 20146 | 0.95850 | 0.98137 | 0.98715 | 10.100 | -0.0031200  | 0.00061300  |
| 201.473.789.062.500 | 10.372  | 10.157 | 104.188.466.072.083 | 10.204 | -0.0011000  | -0.00043200 | 20147 | 0.95503 | 0.98083 | 0.98394 | 10.098 | -0.0022700  | 0.00055400  |
| 201.487.871.093.750 | 10.346  | 10.156 | 103.930.354.118.347 | 10.202 | -0.00080300 | 0.00033200  | 20149 | 0.95236 | 0.98026 | 0.98156 | 10.095 | -0.0016200  | 0.00042400  |
| 201.500.878.906.250 | 10.350  | 10.154 | 103.965.222.835.541 | 10.200 | -0.00020100 | 3,70E-01    | 20150 | 0.95065 | 0.97972 | 0.98012 | 10.092 | -0.0011200  | 0.00028300  |
| 201.513.867.187.500 | 10.341  | 10.153 | 103.872.358.798.981 | 10.199 | -0.00070700 | -0.00071400 | 20151 | 0.94945 | 0.97919 | 0.97919 | 10.089 | -0.00088000 | 0.00016200  |
| 201.526.875.000.000 | 10.332  | 10.151 | 103.775.382.041.931 | 10.197 | -0.0020600  | -0.00048100 | 20153 | 0.94836 | 0.97866 | 0.97836 | 10.087 | -0.00069900 | 0.00013500  |
| 201.540.976.562.500 | 10.285  | 10.149 | 103.307.747.840.881 | 10.194 | -0.0020100  | 0.00060400  | 20154 | 0.94755 | 0.97808 | 0.97785 | 10.084 | -0.00051300 | 0.00015600  |
| 201.553.984.375.000 | 10.277  | 10.147 | 103.223.669.528.961 | 10.192 | -0.00042300 | 0.00010500  | 20155 | 0.94697 | 0.97756 | 0.97753 | 10.081 | -0.00027500 | 0.00023200  |
| 201.568.085.937.500 | 10.274  | 10.145 | 103.186.023.235.321 | 10.189 | -0.0017300  | -0.00061200 | 20157 | 0.94681 | 0.97699 | 0.97765 | 10.078 | 0.00011700  | 0.00035300  |
| 201.581.093.750.000 | 10.231  | 10.142 | 102.748.119.831.085 | 10.187 | -0.0020800  | -5,69E-01   | 20158 | 0.94729 | 0.97646 | 0.97840 | 10.076 | 0.00068200  | 0.00042800  |
| 201.595.195.312.500 | 10.217  | 10.140 | 102.613.782.882.690 | 10.184 | -0.0018800  | 8,21E-01    | 20160 | 0.94866 | 0.97590 | 0.98006 | 10.073 | 0.0012800   | 0.00037300  |
| 201.609.296.875.000 | 10.177  | 10.137 | 102.209.115.028.381 | 10.181 | -0.0018500  | 0.00027300  | 20161 | 0.95089 | 0.97534 | 0.98257 | 10.070 | 0.0017300   | 0.00028400  |
| 201.623.398.437.500 | 10.165  | 10.134 | 102.083.218.097.687 | 10.177 | -0.0011100  | -0.00013400 | 20162 | 0.95355 | 0.97478 | 0.98552 | 10.067 | 0.0020800   | 0.00017500  |
| 201.636.425.781.250 | 10.147  | 10.132 | 101.898.837.089.539 | 10.174 | -0.0022100  | -0.00044700 | 20164 | 0.95653 | 0.97426 | 0.98876 | 10.065 | 0.0022100   | -1,86E-01   |
| 201.650.527.343.750 | 10.105  | 10.129 | 101.473.701.000.214 | 10.171 | -0.0023300  | 0.00027100  | 20165 | 0.95954 | 0.97371 | 0.99207 | 10.062 | 0.0020300   | -0.00011100 |
| 201.664.628.906.250 | 10.082  | 10.126 | 101.233.363.151.550 | 10.167 | -0.0014500  | 0.00068600  | 20166 | 0.96225 | 0.97315 | 0.99506 | 10.060 | 0.0019000   | -0.00010900 |
| 201.678.750.000.000 | 10.064  | 10.122 | 101.054.716.110.230 | 10.164 | -0.00039100 | 5,38E-01    | 20168 | 0.96489 | 0.97261 | 0.99799 | 10.057 | 0.0017200   | -0.00020600 |
| 201.692.851.562.500 | 10.071  | 10.119 | 101.112.926.006.317 | 10.160 | -0.0013000  | -0.00063300 | 20169 | 0.96710 | 0.97206 | 10.005  | 10.054 | 0.0013100   | -0.00025800 |
| 201.708.066.406.250 | 10.026  | 10.116 | 100.663.304.328.918 | 10.156 | -0.0022500  | -8,80E-01   | 20171 | 0.96874 | 0.97148 | 10.024  | 10.052 | 0.00096300  | -0.00025400 |
| 201.722.187.500.000 | 10.005  | 10.112 | 100.442.624.092.102 | 10.152 | -0.0015600  | 0.00041600  | 20172 | 0.96993 | 0.97094 | 10.039  | 10.049 | 0.00056700  | -0.00030400 |
| 201.736.308.593.750 | 0.99823 | 10.109 | 100.212.740.898.132 | 10.148 | -0.0010700  | 0.00018800  | 20174 | 0.97035 | 0.97040 | 10.046  | 10.047 | 0.00010600  | -0.00028200 |
| 201.750.429.687.500 | 0.99745 | 10.105 | 100.128.412.246.704 | 10.144 | -0.0010200  | -8,19E-01   | 20175 | 0.97023 | 0.96987 | 10.048  | 10.044 | -0.00022900 | -0.00016200 |
| 201.765.625.000.000 | 0.99523 | 10.101 | 0.999001562595367   | 10.139 | -0.0013100  | -2,78E-01   | 20177 | 0.96968 | 0.96931 | 10.045  | 10.042 | -0.00036800 | 2,52E-01    |
| 201.779.765.625.000 | 0.99360 | 10.098 | 0.997308135032654   | 10.135 | -0.0011100  | 5,10E-01    | 20178 | 0.96915 | 0.96879 | 10.043  | 10.039 | -0.00015500 | 0.00027800  |
| 201.794.980.468.750 | 0.99198 | 10.094 | 0.995626688003540   | 10.130 | -0.0011600  | 1,55E-01    | 20179 | 0.96922 | 0.96823 | 10.047  | 10.037 | 0.00044600  | 0.00056400  |
| 201.809.101.562.500 | 0.99019 | 10.090 | 0.993766009807587   | 10.126 | -0.0010600  | 0.00043900  | 20181 | 0.97046 | 0.96772 | 10.062  | 10.035 | 0.0015000   | 0.00077700  |

|                     |         |        |                     |         |             |             |       |         |         |         |         |             |             |
|---------------------|---------|--------|---------------------|---------|-------------|-------------|-------|---------|---------|---------|---------|-------------|-------------|
| 201.824.316.406.250 | 0.98887 | 10.086 | 0.992379486560822   | 10.122  | 0.00012500  | -6,80E-01   | 20182 | 0.97362 | 0.96717 | 10.097  | 10.032  | 0.0027300   | 0.00083500  |
| 201.839.550.781.250 | 0.99057 | 10.083 | 0.994003117084503   | 10.117  | -0.0012700  | -0.00035600 | 20184 | 0.97876 | 0.96663 | 10.151  | 10.030  | 0.0040400   | 0.00076300  |
| 201.853.671.875.000 | 0.98515 | 10.079 | 0.988516390323639   | 10.113  | -0.00092100 | 0.00055000  | 20185 | 0.98549 | 0.96613 | 10.221  | 10.028  | 0.0049700   | 0.00042100  |
| 201.868.906.250.000 | 0.98787 | 10.075 | 0.991153061389923   | 10.108  | 0.00034900  | 0.00022700  | 20187 | 0.99333 | 0.96560 | 10.303  | 10.025  | 0.0052800   | 7,46E-01    |
| 201.884.140.625.000 | 0.98621 | 10.071 | 0.989423096179962   | 10.103  | -0.00022800 | 1,15E-01    | 20188 | 10.016  | 0.96508 | 10.388  | 10.023  | 0.0051900   | -0.00022200 |
| 201.899.355.468.750 | 0.98717 | 10.067 | 0.990300655364990   | 10.099  | 0.00038400  | 0.00045400  | 20190 | 10.091  | 0.96456 | 10.467  | 10.021  | 0.0046000   | -0.00054400 |
| 201.914.589.843.750 | 0.98738 | 10.063 | 0.990428149700165   | 10.094  | 0.0011600   | -9,91E-01   | 20191 | 10.156  | 0.96405 | 10.534  | 10.019  | 0.0035400   | -0.00080100 |
| 201.929.824.218.750 | 0.99069 | 10.060 | 0.993654251098633   | 10.089  | 8,15E-01    | -0.00075000 | 20193 | 10.199  | 0.96354 | 10.581  | 10.017  | 0.0021600   | -0.00091800 |
| 201.945.078.125.000 | 0.98763 | 10.056 | 0.990506410598755   | 10.085  | -0.0011300  | 2,94E-01    | 20195 | 10.222  | 0.96304 | 10.606  | 10.015  | 0.00073700  | -0.00097500 |
| 201.960.312.500.000 | 0.98724 | 10.052 | 0.990027964115143   | 10.080  | 0.00017100  | 0.00060200  | 20196 | 10.222  | 0.96254 | 10.609  | 10.013  | -0.00081500 | -0.0010000  |
| 201.976.640.625.000 | 0.98817 | 10.049 | 0.990862667560577   | 10.076  | 0.00076600  | 0.00029300  | 20198 | 10.196  | 0.96202 | 10.587  | 10.011  | -0.0024300  | -0.0010400  |
| 201.991.894.531.250 | 0.98966 | 10.045 | 0.992260098457336   | 10.071  | 0.0011000   | -0.00029000 | 20199 | 10.145  | 0.96153 | 10.539  | 10.009  | -0.0041100  | -0.0010400  |
| 202.007.128.906.250 | 0.99151 | 10.042 | 0.994019091129303   | 10.067  | -0.00011800 | -0.00021500 | 20201 | 10.071  | 0.96105 | 10.468  | 10.008  | -0.0056000  | -0.00084000 |
| 202.023.476.562.500 | 0.98929 | 10.038 | 0.991692006587982   | 10.062  | 0.00041800  | 0.00038500  | 20202 | 0.99678 | 0.96054 | 10.368  | 10.006  | -0.0067600  | -0.00068000 |
| 202.038.730.468.750 | 0.99283 | 10.035 | 0.995141446590424   | 10.058  | 0.0011000   | -0.00012800 | 20204 | 0.98568 | 0.96007 | 10.260  | 10.004  | -0.0077500  | -0.00053300 |
| 202.055.078.125.000 | 0.99276 | 10.032 | 0.994958937168121   | 10.054  | 1,44E-01    | -0.00037500 | 20206 | 0.97229 | 0.95958 | 10.130  | 10.003  | -0.0084500  | -0.00028000 |
| 202.070.332.031.250 | 0.99288 | 10.029 | 0.994979441165924   | 10.050  | -8,82E-01   | 0.00029800  | 20207 | 0.95898 | 0.95912 | 0.99997 | 10.001  | -0.0086400  | 4,19E-01    |
| 202.086.679.687.500 | 0.99248 | 10.026 | 0.994468748569489   | 10.046  | 0.00095700  | 4,20E-02    | 20209 | 0.94499 | 0.95863 | 0.98631 | 0.99994 | -0.0083200  | 0.00030900  |
| 202.103.027.343.750 | 0.99601 | 10.024 | 0.997885406017303   | 10.042  | -7,44E-01   | -0.00025600 | 20210 | 0.93178 | 0.95815 | 0.97342 | 0.99979 | -0.0076300  | 0.00058100  |
| 202.119.375.000.000 | 0.99224 | 10.021 | 0.993998110294342   | 10.039  | 0.00012000  | 0.00036500  | 20212 | 0.92005 | 0.95768 | 0.96202 | 0.99964 | -0.0064200  | 0.00085400  |
| 202.135.742.187.500 | 0.99640 | 10.019 | 0.998045980930328   | 10.035  | 0.0011200   | 2,03E-01    | 20214 | 0.91079 | 0.95721 | 0.95308 | 0.99950 | -0.0048300  | 0.0010900   |
| 202.151.015.625.000 | 0.99578 | 10.017 | 0.997310698032379   | 10.032  | 0.00018400  | 0.00014000  | 20215 | 0.90476 | 0.95677 | 0.94735 | 0.99937 | -0.0029800  | 0.0011600   |
| 202.167.363.281.250 | 0.99698 | 10.015 | 0.998396396636963   | 10.029  | 0.0015600   | 0.00041000  | 20217 | 0.90136 | 0.95631 | 0.94428 | 0.99923 | -0.0011800  | 0.0010900   |
| 202.183.730.468.750 | 10.009  | 10.013 | 100.217.509.269.714 | 10.026  | 0.0015300   | -0.00058900 | 20218 | 0.90092 | 0.95586 | 0.94416 | 0.99910 | 0.00058400  | 0.00091000  |
| 202.201.191.406.250 | 10.021  | 10.011 | 100.330.328.941.345 | 10.023  | -0.00043300 | -0.00066500 | 20220 | 0.90334 | 0.95538 | 0.94693 | 0.99897 | 0.0019000   | 0.00060100  |
| 202.217.558.593.750 | 0.99942 | 10.009 | 100.045.073.032.379 | 10.020  | -0.00072400 | 0.00022400  | 20222 | 0.90735 | 0.95493 | 0.95127 | 0.99885 | 0.0026200   | 0.00022700  |
| 202.233.945.312.500 | 0.99977 | 10.008 | 100.067.353.248.596 | 10.017  | 0.00030300  | 0.00050700  | 20223 | 0.91191 | 0.95449 | 0.95615 | 0.99874 | 0.0026400   | -0.00013200 |
| 202.250.312.500.000 | 10.004  | 10.007 | 100.118.136.405.945 | 10.014  | 0.00093800  | 0.00032500  | 20225 | 0.91601 | 0.95406 | 0.96058 | 0.99863 | 0.0021800   | -0.00031300 |
| 202.267.792.968.750 | 10.029  | 10.006 | 100.357.210.636.139 | 10.012  | 0.0014000   | -0.00020800 | 20227 | 0.91930 | 0.95360 | 0.96422 | 0.99852 | 0.0015900   | -0.00035000 |
| 202.284.160.156.250 | 10.052  | 10.005 | 100.564.885.139.465 | 10.010  | 0.00023400  | -0.00046000 | 20228 | 0.92138 | 0.95318 | 0.96662 | 0.99841 | 0.00099900  | -0.00028300 |
| 202.300.546.875.000 | 10.037  | 10.004 | 100.406.372.547.150 | 10.007  | -0.00010600 | 7,23E-01    | 20230 | 0.92257 | 0.95276 | 0.96814 | 0.99832 | 0.00065800  | -9,70E-01   |
| 202.318.027.343.750 | 10.048  | 10.003 | 100.500.071.048.737 | 10.005  | 0.00047900  | 0.00020900  | 20232 | 0.92361 | 0.95231 | 0.96952 | 0.99822 | 0.00067000  | 7,27E-01    |
| 202.335.507.812.500 | 10.054  | 10.003 | 100.543.534.755.707 | 10.003  | 0.00062500  | -0.00021100 | 20234 | 0.92492 | 0.95187 | 0.97117 | 0.99813 | 0.00091200  | 0.00020700  |
| 202.351.914.062.500 | 10.069  | 10.002 | 100.682.151.317.596 | 10.001  | -0.00023600 | -0.00018400 | 20235 | 0.92670 | 0.95147 | 0.97328 | 0.99805 | 0.0013700   | 0.00028200  |
| 202.369.394.531.250 | 10.046  | 10.002 | 100.433.361.530.304 | 0.99997 | 2,48E-02    | 0.00029400  | 20237 | 0.92956 | 0.95104 | 0.97649 | 0.99796 | 0.0018700   | 0.00026800  |

|                     |        |        |                     |         |             |             |       |         |         |         |         |             |             |
|---------------------|--------|--------|---------------------|---------|-------------|-------------|-------|---------|---------|---------|---------|-------------|-------------|
| 202.386.894.531.250 | 10.069 | 10.002 | 100.651.371.479.034 | 0.99980 | 0.00079200  | 3,04E-01    | 20239 | 0.93323 | 0.95061 | 0.98050 | 0.99788 | 0.0023100   | 0.00024400  |
| 202.404.375.000.000 | 10.074 | 10.002 | 100.678.288.936.615 | 0.99965 | 0.00010900  | -6,64E-01   | 20240 | 0.93764 | 0.95019 | 0.98526 | 0.99781 | 0.0027200   | 0.00022700  |
| 202.420.781.250.000 | 10.073 | 10.002 | 100.656.700.134.277 | 0.99951 | 0.00056700  | -2,45E-01   | 20242 | 0.94245 | 0.94980 | 0.99039 | 0.99774 | 0.0030800   | 0.00016500  |
| 202.438.281.250.000 | 10.093 | 10.003 | 100.838.375.091.553 | 0.99938 | 2,59E-01    | -0.00051900 | 20244 | 0.94808 | 0.94939 | 0.99636 | 0.99767 | 0.0032800   | 4,72E-01    |
| 202.455.800.781.250 | 10.074 | 10.003 | 100.632.190.704.346 | 0.99926 | -0.0012500  | -0.00016000 | 20246 | 0.95395 | 0.94899 | 10.026  | 0.99761 | 0.0032400   | -4,32E-01   |
| 202.473.300.781.250 | 10.049 | 10.004 | 100.366.818.904.877 | 0.99915 | -0.00053500 | 0.00061800  | 20247 | 0.95944 | 0.94858 | 10.084  | 0.99755 | 0.0031300   | -0.00010600 |
| 202.491.894.531.250 | 10.055 | 10.005 | 100.403.475.761.414 | 0.99905 | 0.00098100  | 0.00037000  | 20249 | 0.96524 | 0.94816 | 10.146  | 0.99750 | 0.0028600   | -0.00022700 |
| 202.509.414.062.500 | 10.084 | 10.006 | 100.684.988.498.688 | 0.99896 | 0.00080100  | -0.00022200 | 20251 | 0.96977 | 0.94777 | 10.194  | 0.99745 | 0.0023100   | -0.00031300 |
| 202.526.933.593.750 | 10.083 | 10.007 | 100.648.474.693.298 | 0.99888 | 0.00020500  | -0.00031500 | 20253 | 0.97334 | 0.94738 | 10.234  | 0.99740 | 0.0017700   | -0.00032200 |
| 202.544.453.125.000 | 10.092 | 10.008 | 100.720.655.918.121 | 0.99881 | -0.00030400 | -5,86E-01   | 20254 | 0.97596 | 0.94699 | 10.263  | 0.99736 | 0.0011800   | -0.00030700 |
| 202.563.066.406.250 | 10.072 | 10.009 | 100.500.869.750.977 | 0.99874 | -7,01E-02   | 0.00026300  | 20256 | 0.97762 | 0.94658 | 10.284  | 0.99731 | 0.00065900  | -0.00026000 |
| 202.580.585.937.500 | 10.091 | 10.010 | 100.679.934.024.811 | 0.99869 | 0.00064700  | -0.00012900 | 20258 | 0.97835 | 0.94621 | 10.294  | 0.99728 | 0.00024600  | -0.00015900 |
| 202.599.218.750.000 | 10.095 | 10.012 | 100.696.074.962.616 | 0.99865 | -0.00047300 | -0.00029600 | 20260 | 0.97851 | 0.94581 | 10.299  | 0.99724 | 8,49E-01    | -5,55E-01   |
| 202.616.757.812.500 | 10.074 | 10.013 | 100.469.636.917.114 | 0.99861 | -0.00042400 | 0.00018700  | 20262 | 0.97865 | 0.94544 | 10.304  | 0.99721 | 4,51E-01    | -3,66E-02   |
| 202.635.390.625.000 | 10.080 | 10.015 | 100.503.098.964.691 | 0.99859 | 0.00020200  | 0.00013200  | 20264 | 0.97868 | 0.94504 | 10.308  | 0.99719 | 7,17E-01    | 1,95E-01    |
| 202.652.910.156.250 | 10.082 | 10.017 | 100.502.359.867.096 | 0.99857 | 5,42E-01    | -0.00021700 | 20265 | 0.97891 | 0.94468 | 10.314  | 0.99716 | 0.00011600  | -5,06E-01   |
| 202.671.562.500.000 | 10.082 | 10.019 | 100.481.879.711.151 | 0.99856 | -0.00058300 | -0.00013600 | 20267 | 0.97909 | 0.94430 | 10.319  | 0.99714 | -0.00011100 | -0.00017000 |
| 202.690.195.312.500 | 10.060 | 10.021 | 100.242.495.536.804 | 0.99855 | -0.00045100 | 7,97E-01    | 20269 | 0.97850 | 0.94391 | 10.317  | 0.99713 | -0.00051600 | -0.00022900 |
| 202.708.847.656.250 | 10.065 | 10.023 | 100.270.509.719.849 | 0.99855 | -0.00028600 | 0.00019500  | 20271 | 0.97717 | 0.94354 | 10.307  | 0.99711 | -0.00096400 | -0.00023800 |
| 202.727.500.000.000 | 10.049 | 10.026 | 100.092.256.069.183 | 0.99856 | 0.00027700  | 0.00024300  | 20273 | 0.97490 | 0.94316 | 10.288  | 0.99710 | -0.0014000  | -0.00022200 |
| 202.746.152.343.750 | 10.075 | 10.028 | 100.329.637.527.466 | 0.99858 | 0.00062000  | -7,02E-01   | 20275 | 0.97193 | 0.94279 | 10.262  | 0.99709 | -0.0017900  | -0.00019900 |
| 202.764.804.687.500 | 10.072 | 10.030 | 100.278.580.188.751 | 0.99860 | 1,52E-01    | -0.00018400 | 20276 | 0.96821 | 0.94242 | 10.229  | 0.99708 | -0.0021500  | -0.00018000 |
| 202.783.457.031.250 | 10.076 | 10.033 | 100.289.940.834.045 | 0.99862 | -6,73E-01   | 6,72E-01    | 20278 | 0.96391 | 0.94206 | 10.189  | 0.99708 | -0.0024600  | -0.00018700 |
| 202.802.109.375.000 | 10.070 | 10.036 | 100.207.543.373.108 | 0.99866 | 0.00026600  | 3,55E-01    | 20280 | 0.95902 | 0.94169 | 10.144  | 0.99708 | -0.0028500  | -0.00022100 |
| 202.820.781.250.000 | 10.086 | 10.038 | 100.342.631.340.027 | 0.99869 | 6,52E-01    | -0.00018900 | 20282 | 0.95329 | 0.94133 | 10.090  | 0.99708 | -0.0032900  | -0.00021000 |
| 202.839.453.125.000 | 10.072 | 10.041 | 100.184.845.924.377 | 0.99873 | -0.00043900 | 0.00011300  | 20284 | 0.94675 | 0.94097 | 10.029  | 0.99708 | -0.0036300  | -0.00011600 |
| 202.859.218.750.000 | 10.069 | 10.044 | 100.125.014.781.952 | 0.99878 | 0.00049900  | 0.00022600  | 20286 | 0.93934 | 0.94060 | 0.99583 | 0.99709 | -0.0037300  | 2,99E-01    |
| 202.877.910.156.250 | 10.091 | 10.047 | 100.327.205.657.959 | 0.99883 | 0.00043200  | -0.00016900 | 20288 | 0.93240 | 0.94024 | 0.98925 | 0.99710 | -0.0035200  | 0.00017400  |
| 202.896.582.031.250 | 10.085 | 10.050 | 100.237.655.639.648 | 0.99888 | -0.00013200 | -4,30E-01   | 20290 | 0.92620 | 0.93989 | 0.98341 | 0.99710 | -0.0030800  | 0.00024200  |
| 202.916.367.187.500 | 10.086 | 10.053 | 100.225.710.868.835 | 0.99893 | 0.00026700  | 0.00022400  | 20292 | 0.92055 | 0.93952 | 0.97814 | 0.99712 | -0.0025800  | 0.00021300  |
| 202.936.152.343.750 | 10.095 | 10.056 | 100.290.334.224.701 | 0.99899 | 0.00075300  | 7,70E-01    | 20294 | 0.91598 | 0.93916 | 0.97395 | 0.99713 | -0.0022400  | 0.00013600  |
| 202.954.843.750.000 | 10.115 | 10.060 | 100.463.318.824.768 | 0.99905 | 0.00056300  | -0.00026300 | 20295 | 0.91194 | 0.93881 | 0.97027 | 0.99714 | -0.0020600  | 8,44E-01    |
| 202.974.628.906.250 | 10.117 | 10.063 | 100.454.342.365.265 | 0.99911 | -0.00026100 | -0.00036400 | 20297 | 0.90806 | 0.93844 | 0.96677 | 0.99716 | -0.0019100  | 7,25E-01    |
| 202.994.433.593.750 | 10.105 | 10.066 | 100.305.473.804.474 | 0.99918 | -0.00087600 | 7,06E-01    | 20299 | 0.90436 | 0.93808 | 0.96345 | 0.99718 | -0.0017700  | 0.00012200  |
| 203.013.125.000.000 | 10.083 | 10.069 | 100.063.145.160.675 | 0.99924 | 1,11E-01    | 0.00021600  | 20301 | 0.90124 | 0.93774 | 0.96069 | 0.99720 | -0.0014400  | 0.00023800  |

|                     |        |        |                     |         |             |             |       |         |         |         |         |             |             |
|---------------------|--------|--------|---------------------|---------|-------------|-------------|-------|---------|---------|---------|---------|-------------|-------------|
| 203.032.929.687.500 | 10.105 | 10.073 | 100.255.393.981.934 | 0.99930 | -4,59E-01   | -1,34E-01   | 20303 | 0.89881 | 0.93738 | 0.95864 | 0.99721 | -0.00085700 | 0.00034400  |
| 203.052.753.906.250 | 10.082 | 10.076 | 0.999884247779846   | 0.99936 | -4,19E-01   | 0.00012900  | 20305 | 0.89784 | 0.93702 | 0.95806 | 0.99724 | -7,90E-01   | 0.00041600  |
| 203.072.558.593.750 | 10.104 | 10.080 | 100.181.615.352.631 | 0.99942 | 0.00046500  | -3,26E-02   | 20307 | 0.89849 | 0.93666 | 0.95909 | 0.99726 | 0.00079400  | 0.00043200  |
| 203.092.382.812.500 | 10.100 | 10.083 | 100.114.858.150.482 | 0.99948 | -5,48E-01   | -1,10E-01   | 20309 | 0.90099 | 0.93631 | 0.96196 | 0.99728 | 0.0016300   | 0.00034900  |
| 203.112.207.031.250 | 10.102 | 10.087 | 100.101.435.184.479 | 0.99954 | 0.00042100  | 0.00012700  | 20311 | 0.90496 | 0.93595 | 0.96631 | 0.99730 | 0.0021800   | 0.00019500  |
| 203.132.031.250.000 | 10.117 | 10.090 | 100.222.790.241.241 | 0.99960 | 0.00044900  | -8,17E-01   | 20313 | 0.90962 | 0.93559 | 0.97135 | 0.99732 | 0.0024000   | 5,82E-01    |
| 203.152.949.218.750 | 10.120 | 10.094 | 100.223.076.343.536 | 0.99965 | 8,83E-01    | -0.00027800 | 20315 | 0.91476 | 0.93522 | 0.97689 | 0.99735 | 0.0024100   | -1,01E-01   |
| 203.172.792.968.750 | 10.120 | 10.098 | 100.196.778.774.261 | 0.99970 | -0.00068400 | -0.00013000 | 20317 | 0.91946 | 0.93486 | 0.98197 | 0.99737 | 0.0023600   | -2,92E-01   |
| 203.192.617.187.500 | 10.093 | 10.101 | 0.998908400535584   | 0.99975 | -0.00042800 | 0.00024500  | 20319 | 0.92413 | 0.93451 | 0.98702 | 0.99740 | 0.0023000   | -2,67E-01   |
| 203.213.574.218.750 | 10.103 | 10.105 | 0.99958966369629    | 0.99979 | 0.00031500  | 8,33E-01    | 20321 | 0.92883 | 0.93413 | 0.99212 | 0.99742 | 0.0022500   | -3,54E-01   |
| 203.233.417.968.750 | 10.106 | 10.108 | 0.999554038047791   | 0.99983 | -8,82E-01   | -0.00012400 | 20323 | 0.93332 | 0.93378 | 0.99699 | 0.99744 | 0.0021500   | -7,10E-01   |
| 203.253.261.718.750 | 10.099 | 10.112 | 0.998609721660614   | 0.99986 | -0.00017700 | 4,50E-01    | 20325 | 0.93738 | 0.93342 | 10.014  | 0.99746 | 0.0019700   | -9,62E-01   |
| 203.274.218.750.000 | 10.098 | 10.115 | 0.998178303241730   | 0.99989 | 9,53E-01    | 2,75E-01    | 20327 | 0.94137 | 0.93305 | 10.058  | 0.99749 | 0.0017600   | -0.00011400 |
| 203.295.175.781.250 | 10.103 | 10.119 | 0.998331129550934   | 0.99991 | -6,18E-01   | 2,49E-01    | 20330 | 0.94476 | 0.93267 | 10.096  | 0.99751 | 0.0014900   | -0.00012100 |
| 203.315.039.062.500 | 10.096 | 10.123 | 0.997259616851807   | 0.99993 | 0.00019700  | -2,79E-01   | 20332 | 0.94747 | 0.93232 | 10.127  | 0.99753 | 0.0012700   | -0.00011700 |
| 203.336.015.625.000 | 10.111 | 10.126 | 0.998462319374085   | 0.99994 | -0.00017600 | -0.00015100 | 20334 | 0.94993 | 0.93194 | 10.155  | 0.99755 | 0.0010200   | -0.00012600 |
| 203.356.972.656.250 | 10.089 | 10.130 | 0.995824038982391   | 0.99995 | -0.00043600 | 0.00014900  | 20336 | 0.95174 | 0.93157 | 10.177  | 0.99757 | 0.00073600  | -0.00013100 |
| 203.377.949.218.750 | 10.093 | 10.133 | 0.995928049087524   | 0.99996 | 0.00045100  | 5,02E-01    | 20338 | 0.95302 | 0.93119 | 10.194  | 0.99760 | 0.00046800  | -0.00012000 |
| 203.398.945.312.500 | 10.107 | 10.137 | 0.997002184391022   | 0.99996 | -0.00022500 | -0.00018600 | 20340 | 0.95370 | 0.93082 | 10.205  | 0.99762 | 0.00023300  | -0.00011800 |
| 203.419.921.875.000 | 10.084 | 10.141 | 0.994262278079987   | 0.99995 | -0.00033100 | 0.00019500  | 20342 | 0.95400 | 0.93044 | 10.212  | 0.99764 | -2,81E-01   | -0.00014200 |
| 203.440.917.968.750 | 10.094 | 10.144 | 0.994887590408325   | 0.99995 | 0.00059200  | 8,10E-01    | 20344 | 0.95358 | 0.93007 | 10.212  | 0.99766 | -0.00036300 | -0.00016100 |
| 203.461.914.062.500 | 10.109 | 10.148 | 0.996015965938568   | 0.99993 | 9,59E-02    | -0.00019100 | 20346 | 0.95248 | 0.92969 | 10.205  | 0.99768 | -0.00070200 | -0.00015500 |
| 203.482.910.156.250 | 10.094 | 10.151 | 0.994186758995056   | 0.99992 | -0.00021200 | 0.00017400  | 20348 | 0.95064 | 0.92932 | 10.190  | 0.99770 | -0.0010200  | -0.00012200 |
| 203.503.906.250.000 | 10.100 | 10.155 | 0.994379401206970   | 0.99990 | 0.00074100  | -2,79E-01   | 20350 | 0.94821 | 0.92894 | 10.170  | 0.99772 | -0.0012100  | -6,76E-01   |
| 203.524.921.875.000 | 10.125 | 10.158 | 0.996545493602753   | 0.99988 | -0.00032900 | -0.00030300 | 20352 | 0.94554 | 0.92857 | 10.147  | 0.99774 | -0.0013000  | 2,86E-02    |
| 203.547.050.781.250 | 10.085 | 10.162 | 0.992177486419678   | 0.99985 | -0.00056600 | 0.00030700  | 20355 | 0.94260 | 0.92817 | 10.122  | 0.99776 | -0.0012000  | 9,61E-01    |
| 203.568.066.406.250 | 10.101 | 10.166 | 0.993311762809753   | 0.99982 | 0.00099600  | 0.00029800  | 20357 | 0.94035 | 0.92780 | 10.103  | 0.99778 | -0.00088500 | 0.00014200  |
| 203.589.082.031.250 | 10.127 | 10.169 | 0.995586991310120   | 0.99979 | 0.00068400  | -0.00022500 | 20359 | 0.93888 | 0.92742 | 10.093  | 0.99779 | -0.00060300 | 0.00010200  |
| 203.611.210.937.500 | 10.130 | 10.173 | 0.995458483695984   | 0.99975 | 2,64E-01    | -0.00012700 | 20361 | 0.93775 | 0.92703 | 10.085  | 0.99781 | -0.00044400 | 4,41E-01    |
| 203.633.359.375.000 | 10.128 | 10.177 | 0.994870424270630   | 0.99971 | 0.00012000  | -3,30E-01   | 20363 | 0.93691 | 0.92663 | 10.081  | 0.99783 | -0.00040700 | -4,82E-01   |
| 203.654.394.531.250 | 10.135 | 10.180 | 0.995158255100250   | 0.99967 | -0.00011600 | -1,48E-01   | 20365 | 0.93599 | 0.92626 | 10.076  | 0.99785 | -0.00065200 | -0.00015400 |
| 203.676.523.437.500 | 10.123 | 10.184 | 0.993543088436127   | 0.99962 | 5,65E-01    | 0.00015800  | 20368 | 0.93410 | 0.92586 | 10.061  | 0.99787 | -0.0010700  | -0.00018700 |
| 203.698.691.406.250 | 10.138 | 10.188 | 0.994552075862885   | 0.99957 | 0.00058400  | 3,28E-01    | 20370 | 0.93124 | 0.92547 | 10.037  | 0.99789 | -0.0014800  | -0.00018500 |
| 203.719.726.562.500 | 10.149 | 10.192 | 0.995222449302673   | 0.99952 | 0.00019800  | -0.00013600 | 20372 | 0.92770 | 0.92509 | 10.005  | 0.99791 | -0.0018800  | -0.00013300 |
| 203.741.894.531.250 | 10.146 | 10.196 | 0.994558513164520   | 0.99947 | -4,38E-02   | 8,87E-01    | 20374 | 0.92314 | 0.92470 | 0.99636 | 0.99792 | -0.0020600  | -7,98E-02   |

|                     |        |        |                     |         |             |             |       |         |         |         |         |             |             |
|---------------------|--------|--------|---------------------|---------|-------------|-------------|-------|---------|---------|---------|---------|-------------|-------------|
| 203.764.062.500.000 | 10.149 | 10.199 | 0.994322955608368   | 0.99941 | 0.00059200  | 0.00018900  | 20376 | 0.91858 | 0.92431 | 0.99221 | 0.99794 | -0.0019100  | 0.00012200  |
| 203.786.230.468.750 | 10.173 | 10.203 | 0.996293902397156   | 0.99935 | 0.00083600  | 4,57E-01    | 20379 | 0.91467 | 0.92391 | 0.98871 | 0.99796 | -0.0015200  | 0.00022200  |
| 203.808.417.968.750 | 10.186 | 10.207 | 0.997134029865265   | 0.99929 | 0.00079400  | -0.00025100 | 20381 | 0.91184 | 0.92352 | 0.98630 | 0.99798 | -0.00092700 | 0.00025700  |
| 203.830.585.937.500 | 10.208 | 10.211 | 0.998914301395416   | 0.99922 | -0.00027900 | -0.00023100 | 20383 | 0.91056 | 0.92313 | 0.98543 | 0.99800 | -0.00037700 | 0.00020300  |
| 203.852.773.437.500 | 10.173 | 10.215 | 0.994984030723572   | 0.99916 | -0.00023000 | 0.00017800  | 20385 | 0.91017 | 0.92273 | 0.98545 | 0.99801 | -2,46E-01   | 0.00010100  |
| 203.874.960.937.500 | 10.198 | 10.219 | 0.996972024440765   | 0.99909 | 0.00051200  | 0.00028600  | 20387 | 0.91045 | 0.92234 | 0.98614 | 0.99803 | 7,28E-01    | 6,31E-02    |
| 203.898.281.250.000 | 10.196 | 10.223 | 0.996361196041107   | 0.99902 | 0.00107000  | 4,11E-01    | 20390 | 0.91050 | 0.92193 | 0.98662 | 0.99805 | 4,15E-02    | -3,34E-01   |
| 203.920.468.750.000 | 10.246 | 10.227 | 100.088.155.269.623 | 0.99895 | 0.00069900  | -0.00027700 | 20392 | 0.91047 | 0.92154 | 0.98700 | 0.99807 | -7,92E-01   | -4,52E-01   |
| 203.942.675.781.250 | 10.228 | 10.231 | 0.998519778251648   | 0.99888 | -0.00016100 | -1,52E-01   | 20394 | 0.91015 | 0.92114 | 0.98709 | 0.99808 | -0.00019600 | -5,34E-01   |
| 203.965.996.093.750 | 10.239 | 10.235 | 0.999170780181885   | 0.99880 | 0.00062900  | 6,06E-01    | 20397 | 0.90957 | 0.92073 | 0.98694 | 0.99810 | -0.00032200 | -5,52E-01   |
| 203.988.222.656.250 | 10.256 | 10.239 | 100.040.185.451.508 | 0.99872 | 0.00011400  | -6,33E-01   | 20399 | 0.90868 | 0.92034 | 0.98646 | 0.99812 | -0.00044800 | -3,00E-01   |
| 204.011.542.968.750 | 10.244 | 10.244 | 0.998699367046356   | 0.99864 | 0.00034100  | 6,99E-01    | 20401 | 0.90753 | 0.91993 | 0.98574 | 0.99814 | -0.00045900 | 4,41E-01    |
| 204.033.769.531.250 | 10.272 | 10.248 | 100.095.427.036.285 | 0.99857 | 0.00043300  | 1,40E-01    | 20403 | 0.90659 | 0.91954 | 0.98521 | 0.99815 | -0.00024700 | 0.00013400  |
| 204.057.109.375.000 | 10.264 | 10.252 | 0.999661862850189   | 0.99849 | 0.00040500  | -8,16E-01   | 20406 | 0.90641 | 0.91913 | 0.98545 | 0.99817 | 0.00015000  | 0.00017500  |
| 204.080.468.750.000 | 10.291 | 10.257 | 100.180.220.603.943 | 0.99841 | 5,17E-01    | -0.00014500 | 20408 | 0.90729 | 0.91872 | 0.98677 | 0.99819 | 0.00057200  | 0.00016300  |
| 204.102.714.843.750 | 10.266 | 10.261 | 0.998870909214020   | 0.99833 | -0.00025400 | 8,25E-01    | 20410 | 0.90902 | 0.91833 | 0.98890 | 0.99821 | 0.00089500  | 9,14E-01    |
| 204.126.074.218.750 | 10.279 | 10.265 | 0.999607443809509   | 0.99825 | 0.00042800  | 0.00018000  | 20413 | 0.91137 | 0.91792 | 0.99168 | 0.99823 | 0.00098900  | -1,28E-01   |
| 204.149.433.593.750 | 10.286 | 10.270 | 0.999801218509674   | 0.99817 | 0.00058500  | -8,64E-01   | 20415 | 0.91364 | 0.91751 | 0.99437 | 0.99824 | 0.00083500  | -8,99E-01   |
| 204.172.792.968.750 | 10.306 | 10.275 | 100.126.409.530.640 | 0.99808 | 2,44E-01    | -0.00012100 | 20417 | 0.91527 | 0.91710 | 0.99643 | 0.99826 | 0.00056900  | -0.00012100 |
| 204.196.171.875.000 | 10.287 | 10.279 | 0.998828470706940   | 0.99800 | 1,84E-01    | 8,29E-01    | 20420 | 0.91630 | 0.91669 | 0.99788 | 0.99828 | 0.00026800  | -0.00012800 |
| 204.219.550.781.250 | 10.307 | 10.284 | 100.025.463.104.248 | 0.99792 | 0.00041200  | 0.00011400  | 20422 | 0.91652 | 0.91629 | 0.99854 | 0.99830 | -3,08E-01   | -0.00010400 |
| 204.242.929.687.500 | 10.307 | 10.289 | 0.999649882316589   | 0.99784 | 0.00055000  | -4,08E-01   | 20424 | 0.91615 | 0.91588 | 0.99859 | 0.99831 | -0.00022000 | -6,52E-01   |
| 204.266.328.125.000 | 10.333 | 10.293 | 100.171.554.088.593 | 0.99776 | 0.00022100  | -0.00014400 | 20427 | 0.91550 | 0.91547 | 0.99836 | 0.99833 | -0.00033600 | -3,93E-01   |
| 204.290.839.843.750 | 10.317 | 10.299 | 0.999558925628662   | 0.99768 | -0.00014100 | -5,81E-01   | 20429 | 0.91455 | 0.91505 | 0.99785 | 0.99835 | -0.00040800 | -1,29E-01   |
| 204.314.238.281.250 | 10.326 | 10.303 | 0.999880194664001   | 0.99761 | -5,74E-01   | 4,24E-01    | 20431 | 0.91354 | 0.91464 | 0.99727 | 0.99837 | -0.00039800 | 2,63E-01    |
| 204.337.656.250.000 | 10.315 | 10.308 | 0.998149573802948   | 0.99753 | 5,73E-01    | 0.00013500  | 20434 | 0.91268 | 0.91424 | 0.99684 | 0.99839 | -0.00028500 | 6,06E-01    |
| 204.362.187.500.000 | 10.329 | 10.314 | 0.998978018760681   | 0.99745 | 0.00059000  | 0.00011700  | 20436 | 0.91218 | 0.91381 | 0.99678 | 0.99841 | -0.00010700 | 8,46E-01    |
| 204.385.605.468.750 | 10.343 | 10.319 | 0.999790847301483   | 0.99738 | 0.00061900  | -4,28E-01   | 20439 | 0.91217 | 0.91341 | 0.99719 | 0.99843 | 0.00012100  | 0.00011400  |
| 204.409.023.437.500 | 10.358 | 10.324 | 100.070.810.317.993 | 0.99731 | 0.00038900  | -0.00013500 | 20441 | 0.91274 | 0.91300 | 0.99819 | 0.99845 | 0.00042600  | 0.00012300  |
| 204.433.574.218.750 | 10.362 | 10.329 | 100.045.216.083.527 | 0.99724 | -2,95E-01   | 4,19E-02    | 20443 | 0.91421 | 0.91258 | 10.001  | 0.99847 | 0.00071200  | 9,21E-01    |
| 204.458.125.000.000 | 10.356 | 10.335 | 0.999320805072784   | 0.99717 | 0.00041000  | 7,63E-01    | 20446 | 0.91624 | 0.91216 | 10.026  | 0.99849 | 0.00087800  | 4,29E-01    |
| 204.481.562.500.000 | 10.381 | 10.340 | 100.119.471.549.988 | 0.99711 | 0.00033700  | -0.00016100 | 20448 | 0.91843 | 0.91176 | 10.052  | 0.99851 | 0.00091700  | -2,11E-01   |
| 204.506.113.281.250 | 10.373 | 10.346 | 0.999703168869019   | 0.99704 | -0.00036100 | -0.00011700 | 20451 | 0.92064 | 0.91134 | 10.078  | 0.99853 | 0.00077700  | -9,90E-01   |
| 204.530.683.593.750 | 10.363 | 10.352 | 0.998150944709778   | 0.99698 | -0.00023700 | 0.00014800  | 20453 | 0.92224 | 0.91092 | 10.099  | 0.99855 | 0.00043100  | -0.00015700 |
| 204.555.273.437.500 | 10.361 | 10.358 | 0.997256457805634   | 0.99692 | 0.00036400  | 0.00020300  | 20456 | 0.92276 | 0.91050 | 10.108  | 0.99857 | 5,33E-02    | -0.00016300 |

|                     |        |        |                    |         |             |             |       |         |         |         |         |             |             |
|---------------------|--------|--------|--------------------|---------|-------------|-------------|-------|---------|---------|---------|---------|-------------|-------------|
| 204.579.843.750.000 | 10.381 | 10.364 | 0.998651325702667  | 0.99687 | 0.00076000  | 2,27E-01    | 20458 | 0.92227 | 0.91008 | 10.108  | 0.99859 | -0.00036800 | -0.00012700 |
| 204.604.433.593.750 | 10.398 | 10.370 | 0.999693870544434  | 0.99682 | 0.00047600  | -0.00025800 | 20460 | 0.92095 | 0.90966 | 10.099  | 0.99861 | -0.00062100 | -5,87E-01   |
| 204.629.023.437.500 | 10.405 | 10.376 | 0.999681174755096  | 0.99677 | -0.00050900 | -0.00012100 | 20463 | 0.91922 | 0.90924 | 10.086  | 0.99863 | -0.00065700 | 1,17E-01    |
| 204.653.632.812.500 | 10.373 | 10.382 | 0.995867788791657  | 0.99672 | -0.00011700 | 0.00021000  | 20465 | 0.91772 | 0.90883 | 10.075  | 0.99866 | -0.00056300 | 3,20E-01    |
| 204.678.222.656.250 | 10.399 | 10.388 | 0.997774481773376  | 0.99668 | 0.00052200  | -6,00E-01   | 20468 | 0.91645 | 0.90841 | 10.067  | 0.99868 | -0.00049900 | 1,23E-01    |
| 204.702.832.031.250 | 10.399 | 10.394 | 0.997094333171845  | 0.99665 | -0.00041200 | -1,64E-01   | 20470 | 0.91526 | 0.90800 | 10.060  | 0.99870 | -0.00050300 | -2,83E-01   |
| 204.727.460.937.500 | 10.379 | 10.401 | 0.994394123554230  | 0.99661 | 0.00044100  | 0.00011300  | 20473 | 0.91397 | 0.90758 | 10.051  | 0.99873 | -0.00063900 | -8,41E-01   |
| 204.752.089.843.750 | 10.421 | 10.407 | 0.997904419898987  | 0.99658 | 0.00014600  | -0.00012000 | 20475 | 0.91211 | 0.90717 | 10.037  | 0.99875 | -0.00091700 | -0.00010200 |
| 204.777.832.031.250 | 10.386 | 10.414 | 0.993729829788208  | 0.99655 | -0.00016600 | 0.00022400  | 20478 | 0.90935 | 0.90674 | 10.014  | 0.99878 | -0.0011500  | -6,87E-01   |
| 204.802.460.937.500 | 10.412 | 10.421 | 0.995656013488770  | 0.99652 | 0.0012700   | 0.00011900  | 20480 | 0.90632 | 0.90632 | 0.99879 | 0.99880 | -0.0012600  | -1,94E-02   |
| 204.828.222.656.250 | 10.450 | 10.428 | 0.998723626136780  | 0.99650 | 0.00043200  | -0.00030200 | 20483 | 0.90299 | 0.90589 | 0.99592 | 0.99883 | -0.0011600  | 8,02E-01    |
| 204.852.871.093.750 | 10.434 | 10.435 | 0.996400058269501  | 0.99648 | -0.00025000 | -0.00010300 | 20485 | 0.90047 | 0.90548 | 0.99384 | 0.99885 | -0.00085800 | 0.00013000  |
| 204.878.652.343.750 | 10.438 | 10.442 | 0.996017932891846  | 0.99646 | -8,62E-01   | 4,83E-01    | 20488 | 0.89866 | 0.90506 | 0.99248 | 0.99888 | -0.00050300 | 0.00013300  |
| 204.903.300.781.250 | 10.430 | 10.449 | 0.994513154029846  | 0.99645 | -6,92E-02   | 6,74E-01    | 20490 | 0.89793 | 0.90465 | 0.99219 | 0.99891 | -0.00018800 | 9,59E-01    |
| 204.929.101.562.500 | 10.437 | 10.456 | 0.994519889354706  | 0.99644 | 0.00025400  | 9,80E-01    | 20493 | 0.89771 | 0.90422 | 0.99243 | 0.99893 | -1,88E-01   | 5,38E-01    |
| 204.954.882.812.500 | 10.443 | 10.464 | 0.994317412376404  | 0.99643 | 0.00049900  | 5,94E-01    | 20495 | 0.89784 | 0.90380 | 0.99300 | 0.99896 | 8,96E-01    | 4,25E-01    |
| 204.979.570.312.500 | 10.462 | 10.471 | 0.9955523610111505 | 0.99642 | 0.00055400  | -5,39E-01   | 20498 | 0.89817 | 0.90339 | 0.99377 | 0.99899 | 0.00019600  | 2,58E-01    |
| 205.005.371.093.750 | 10.471 | 10.479 | 0.995618283748627  | 0.99642 | 0.00022700  | -9,86E-01   | 20501 | 0.89882 | 0.90297 | 0.99488 | 0.99902 | 0.00022000  | -1,02E-01   |
| 205.031.191.406.250 | 10.474 | 10.486 | 0.995183408260345  | 0.99642 | 4,46E-01    | 5,80E-01    | 20503 | 0.89930 | 0.90255 | 0.99581 | 0.99905 | 0.00014300  | -3,07E-01   |
| 205.057.011.718.750 | 10.473 | 10.494 | 0.994299113750458  | 0.99642 | 0.00052600  | 0.00014800  | 20506 | 0.89956 | 0.90212 | 0.99652 | 0.99908 | 6,13E-01    | -2,90E-01   |
| 205.082.832.031.250 | 10.501 | 10.502 | 0.996339380741119  | 0.99643 | 0.00081000  | -0.00012600 | 20508 | 0.89962 | 0.90170 | 0.99703 | 0.99911 | -6,81E-02   | -3,29E-01   |
| 205.108.671.875.000 | 10.515 | 10.510 | 0.996910333633423  | 0.99644 | -0.00012400 | -0.00021900 | 20511 | 0.89953 | 0.90129 | 0.99739 | 0.99914 | -0.00010900 | -4,17E-01   |
| 205.134.511.718.750 | 10.495 | 10.518 | 0.994117915630341  | 0.99645 | -0.00032300 | 0.00017500  | 20513 | 0.89906 | 0.90087 | 0.99737 | 0.99918 | -0.00022200 | -2,91E-01   |
| 205.161.464.843.750 | 10.498 | 10.527 | 0.993577539920807  | 0.99646 | 0.00080000  | 0.00018400  | 20516 | 0.89835 | 0.90043 | 0.99713 | 0.99921 | -0.00026200 | -1,60E-01   |
| 205.187.324.218.750 | 10.537 | 10.535 | 0.996702551841736  | 0.99647 | 0.00064700  | -0.00019200 | 20519 | 0.89767 | 0.90001 | 0.99690 | 0.99924 | -0.00030700 | -1,86E-01   |
| 205.213.183.593.750 | 10.531 | 10.543 | 0.995306491851807  | 0.99649 | -0.00019500 | -5,01E-01   | 20521 | 0.89677 | 0.89960 | 0.99645 | 0.99928 | -0.00035900 | -1,13E-01   |
| 205.239.042.968.750 | 10.527 | 10.551 | 0.994069695472717  | 0.99651 | 0.00038700  | 0.00020900  | 20524 | 0.89582 | 0.89918 | 0.99595 | 0.99931 | -0.00036600 | 9,30E-03    |
| 205.266.054.687.500 | 10.552 | 10.560 | 0.995681643486023  | 0.99653 | 0.00091200  | -2,32E-01   | 20527 | 0.89483 | 0.89875 | 0.99543 | 0.99935 | -0.00035400 | 1,21E-01    |
| 205.291.933.593.750 | 10.575 | 10.569 | 0.997206389904022  | 0.99655 | 0.00026500  | -0.00017200 | 20529 | 0.89395 | 0.89834 | 0.99499 | 0.99938 | -0.00030200 | 2,71E-01    |
| 205.318.945.312.500 | 10.566 | 10.578 | 0.995385468006134  | 0.99658 | 2,58E-02    | 9,06E-02    | 20532 | 0.89324 | 0.89791 | 0.99475 | 0.99942 | -0.00021000 | 3,60E-01    |
| 205.344.843.750.000 | 10.575 | 10.586 | 0.995512843132019  | 0.99661 | 0.00031300  | 5,25E-01    | 20534 | 0.89284 | 0.89750 | 0.99479 | 0.99945 | -0.00011100 | 4,35E-01    |
| 205.371.855.468.750 | 10.582 | 10.595 | 0.995320737361908  | 0.99664 | 0.00028000  | 2,03E-01    | 20537 | 0.89265 | 0.89707 | 0.99508 | 0.99949 | 2,00E-01    | 5,85E-01    |
| 205.398.886.718.750 | 10.591 | 10.605 | 0.995261967182159  | 0.99667 | 0.00042200  | 3,81E-01    | 20540 | 0.89294 | 0.89664 | 0.99583 | 0.99953 | 0.00020500  | 5,70E-01    |
| 205.424.804.687.500 | 10.605 | 10.614 | 0.995815396308899  | 0.99671 | 0.00048200  | -1,44E-01   | 20542 | 0.89374 | 0.89623 | 0.99707 | 0.99957 | 0.00032100  | 2,09E-01    |
| 205.451.855.468.750 | 10.616 | 10.623 | 0.996061861515045  | 0.99674 | 0.00034600  | -1,85E-01   | 20545 | 0.89465 | 0.89580 | 0.99845 | 0.99960 | 0.00031600  | -2,96E-01   |



|                     |        |        |                     |         |             |             |       |         |         |         |         |             |             |
|---------------------|--------|--------|---------------------|---------|-------------|-------------|-------|---------|---------|---------|---------|-------------|-------------|
| 205.478.906.250.000 | 10.623 | 10.632 | 0.995886921882629   | 0.99678 | 0.00038200  | -1,48E-01   | 20548 | 0.89545 | 0.89538 | 0.99971 | 0.99964 | 0.00016100  | -7,35E-01   |
| 205.505.976.562.500 | 10.637 | 10.642 | 0.996315598487854   | 0.99682 | 0.00026600  | -2,68E-01   | 20551 | 0.89552 | 0.89495 | 10.002  | 0.99968 | -8,15E-01   | -8,40E-01   |
| 205.533.046.875.000 | 10.638 | 10.651 | 0.995502233505249   | 0.99686 | 0.00023700  | 7,92E-01    | 20553 | 0.89501 | 0.89453 | 10.002  | 0.99972 | -0.00029300 | -5,87E-01   |
| 205.560.117.187.500 | 10.650 | 10.661 | 0.995761454105377   | 0.99690 | 0.00069500  | 0.00012700  | 20556 | 0.89393 | 0.89410 | 0.99959 | 0.99976 | -0.00039900 | -7,12E-02   |
| 205.587.207.031.250 | 10.675 | 10.671 | 0.997415363788605   | 0.99695 | 0.00092700  | -3,28E-01   | 20559 | 0.89284 | 0.89368 | 0.99896 | 0.99980 | -0.00033200 | 3,43E-01    |
| 205.614.296.875.000 | 10.700 | 10.681 | 0.998923480510712   | 0.99699 | 0.00051700  | -0.00014800 | 20561 | 0.89213 | 0.89326 | 0.99871 | 0.99984 | -0.00021300 | 4,30E-01    |
| 205.641.386.718.750 | 10.703 | 10.690 | 0.998344361782074   | 0.99704 | 0.00012500  | -6,62E-01   | 20564 | 0.89169 | 0.89283 | 0.99873 | 0.99988 | -9,89E-01   | 4,27E-01    |
| 205.668.496.093.750 | 10.707 | 10.700 | 0.997717022895813   | 0.99709 | 0.00015800  | 7,89E-01    | 20567 | 0.89160 | 0.89241 | 0.99910 | 0.99991 | 1,80E-01    | 4,30E-01    |
| 205.696.738.281.250 | 10.712 | 10.711 | 0.997282326221466   | 0.99714 | 0.00056200  | 3,60E-01    | 20570 | 0.89179 | 0.89197 | 0.99977 | 0.99996 | 0.00013900  | 3,82E-01    |
| 205.723.847.656.250 | 10.738 | 10.721 | 0.998879313468933   | 0.99719 | 0.00035800  | -5,34E-01   | 20572 | 0.89237 | 0.89155 | 10.008  | 100.000 | 0.00023000  | 3,52E-01    |
| 205.750.976.562.500 | 10.732 | 10.731 | 0.997300148010254   | 0.99724 | 0.00027300  | 6,67E-01    | 20575 | 0.89303 | 0.89113 | 10.019  | 10.000  | 0.00033000  | 5,21E-01    |
| 205.779.238.281.250 | 10.753 | 10.742 | 0.998413801193237   | 0.99730 | 0.00072700  | -9,33E-02   | 20578 | 0.89419 | 0.89070 | 10.036  | 10.001  | 0.00051800  | 6,72E-01    |
| 205.806.386.718.750 | 10.772 | 10.752 | 0.999340951442719   | 0.99735 | 0.00022100  | -0.00012000 | 20581 | 0.89591 | 0.89028 | 10.057  | 10.001  | 0.00070300  | 4,71E-01    |
| 205.834.667.968.750 | 10.765 | 10.763 | 0.997637271881104   | 0.99741 | 6,23E-01    | 0.00010900  | 20583 | 0.89809 | 0.88984 | 10.084  | 10.002  | 0.00077900  | -9,10E-02   |
| 205.861.816.406.250 | 10.775 | 10.773 | 0.997672617435455   | 0.99746 | 0.00082400  | 6,46E-01    | 20586 | 0.90022 | 0.88943 | 10.110  | 10.002  | 0.00065200  | -8,40E-01   |
| 205.890.117.187.500 | 10.811 | 10.784 | 100.018.012.523.651 | 0.99752 | 0.00042000  | -0.00012900 | 20589 | 0.90170 | 0.88899 | 10.130  | 10.002  | 0.00031300  | -0.00013900 |
| 205.918.417.968.750 | 10.799 | 10.795 | 0.997971296310425   | 0.99758 | 9,66E-01    | 5,25E-01    | 20592 | 0.90200 | 0.88856 | 10.137  | 10.003  | -0.00013600 | -0.00014600 |
| 205.946.738.281.250 | 10.816 | 10.806 | 0.998632788658142   | 0.99764 | 0.00071800  | 6,40E-01    | 20595 | 0.90093 | 0.88812 | 10.131  | 10.003  | -0.00051500 | -0.00011100 |
| 205.973.925.781.250 | 10.839 | 10.817 | 0.999889492988586   | 0.99770 | 0.00045200  | -4,95E-01   | 20597 | 0.89914 | 0.88771 | 10.118  | 10.004  | -0.00075500 | -6,59E-01   |
| 206.002.246.093.750 | 10.841 | 10.828 | 0.999064862728119   | 0.99776 | 0.00044300  | -3,16E-01   | 20600 | 0.89674 | 0.88727 | 10.099  | 10.004  | -0.00088100 | -4,10E-01   |
| 206.030.585.937.500 | 10.864 | 10.840 | 100.026.714.801.788 | 0.99782 | 0.00027300  | -0.00014800 | 20603 | 0.89415 | 0.88684 | 10.077  | 10.004  | -0.00098700 | -3,49E-01   |
| 206.058.925.781.250 | 10.857 | 10.851 | 0.998465836048126   | 0.99788 | -0.00039400 | 4,39E-01    | 20606 | 0.89115 | 0.88641 | 10.052  | 10.005  | -0.0010800  | -2,17E-01   |
| 206.087.285.156.250 | 10.842 | 10.862 | 0.995870351791382   | 0.99794 | 0.00052200  | 0.00022900  | 20609 | 0.88804 | 0.88598 | 10.026  | 10.005  | -0.0011100  | 4,54E-02    |
| 206.115.644.531.250 | 10.886 | 10.874 | 0.999253809452057   | 0.99800 | 0.00090200  | -4,76E-01   | 20612 | 0.88486 | 0.88555 | 0.99987 | 10.006  | -0.0010500  | 4,51E-01    |
| 206.144.003.906.250 | 10.893 | 10.885 | 0.998801708221436   | 0.99806 | 0.00025200  | -3,68E-01   | 20614 | 0.88207 | 0.88511 | 0.99755 | 10.006  | -0.00085400 | 8,44E-01    |
| 206.173.515.625.000 | 10.901 | 10.898 | 0.998470366001129   | 0.99812 | 0.00068900  | 9,17E-02    | 20617 | 0.87991 | 0.88467 | 0.99589 | 10.006  | -0.00056400 | 9,73E-01    |
| 206.201.894.531.250 | 10.933 | 10.909 | 100.053.346.157.074 | 0.99818 | 0.00030500  | -0.00013000 | 20620 | 0.87880 | 0.88423 | 0.99525 | 10.007  | -0.00029000 | 7,14E-01    |
| 206.230.292.968.750 | 10.918 | 10.921 | 0.997977733612061   | 0.99824 | -4,98E-01   | 4,94E-01    | 20623 | 0.87827 | 0.88380 | 0.99518 | 10.007  | -0.00015800 | 2,94E-01    |
| 206.259.824.218.750 | 10.930 | 10.933 | 0.997959494590759   | 0.99830 | 0.00059200  | 0.00011200  | 20626 | 0.87788 | 0.88336 | 0.99529 | 10.008  | -0.00012000 | 3,68E-02    |
| 206.288.222.656.250 | 10.953 | 10.945 | 0.999106407165527   | 0.99836 | 0.00060000  | -6,13E-02   | 20629 | 0.87757 | 0.88293 | 0.99544 | 10.008  | -0.00013700 | -1,95E-01   |
| 206.316.640.625.000 | 10.964 | 10.957 | 0.999103188514710   | 0.99842 | 0.00055700  | -3,17E-02   | 20632 | 0.87710 | 0.88250 | 0.99544 | 10.008  | -0.00023100 | -3,29E-01   |
| 206.346.210.937.500 | 10.985 | 10.970 | 100.000.774.860.382 | 0.99848 | 0.00058200  | -8,81E-01   | 20635 | 0.87623 | 0.88205 | 0.99505 | 10.009  | -0.00032800 | -2,72E-01   |
| 206.374.628.906.250 | 10.998 | 10.982 | 100.013.744.831.085 | 0.99854 | 4,59E-01    | -5,82E-01   | 20637 | 0.87520 | 0.88162 | 0.99450 | 10.009  | -0.00038900 | -2,31E-01   |
| 206.404.218.750.000 | 10.988 | 10.994 | 0.997919738292694   | 0.99860 | 0.00024400  | 9,23E-01    | 20640 | 0.87397 | 0.88117 | 0.99375 | 10.009  | -0.00046200 | -8,98E-03   |
| 206.433.789.062.500 | 11.012 | 11.007 | 0.999166548252106   | 0.99866 | 0.00059200  | -7,28E-02   | 20643 | 0.87247 | 0.88072 | 0.99273 | 10.010  | -0.00039500 | 4,98E-01    |

|                     |        |        |                     |         |            |             |       |         |         |         |        |             |           |
|---------------------|--------|--------|---------------------|---------|------------|-------------|-------|---------|---------|---------|--------|-------------|-----------|
| 206.462.246.093.750 | 11.022 | 11.019 | 0.998973131179810   | 0.99872 | 0.00020200 | 4,08E-03    | 20646 | 0.87168 | 0.88029 | 0.99241 | 10.010 | -0.00017300 | 8,17E-01  |
| 206.491.855.468.750 | 11.024 | 11.032 | 0.997941374778748   | 0.99878 | 0.00059400 | 9,83E-01    | 20649 | 0.87147 | 0.87985 | 0.99268 | 10.011 | 7,97E-01    | 8,04E-01  |
| 206.521.464.843.750 | 11.057 | 11.045 | 100.003.457.069.397 | 0.99884 | 0.00078400 | -8,71E-01   | 20652 | 0.87215 | 0.87940 | 0.99384 | 10.011 | 0.00030300  | 5,66E-01  |
| 206.551.074.218.750 | 11.070 | 11.058 | 100.011.074.542.399 | 0.99890 | 7,86E-01   | -0.00012600 | 20655 | 0.87326 | 0.87895 | 0.99544 | 10.011 | 0.00041500  | 1,69E-01  |
| 206.580.703.125.000 | 11.062 | 11.071 | 0.998014032840729   | 0.99896 | 3,70E-01   | 9,16E-01    | 20658 | 0.87461 | 0.87851 | 0.99726 | 10.012 | 0.00040300  | -2,06E-01 |
| 206.610.351.562.500 | 11.073 | 11.084 | 0.997828006744385   | 0.99902 | 0.00062200 | 0.00013800  | 20661 | 0.87565 | 0.87806 | 0.99879 | 10.012 | 0.00029300  | -3,38E-01 |
| 206.640.000.000.000 | 11.099 | 11.098 | 0.999185204505920   | 0.99908 | 0.00085600 | -0.00011600 | 20664 | 0.87635 | 0.87761 | 0.99996 | 10.012 | 0.00020300  | -3,19E-01 |
| 206.669.648.437.500 | 11.123 | 11.111 | 100.037.348.270.416 | 0.99913 | -6,38E-01  | -0.00010800 | 20667 | 0.87686 | 0.87716 | 10.010  | 10.013 | 0.00010400  | -3,41E-01 |
| 206.699.316.406.250 | 11.095 | 11.124 | 0.996261298656464   | 0.99919 | 0.00021400 | 0.00017200  | 20670 | 0.87696 | 0.87671 | 10.015  | 10.013 | 7,35E-03    | -2,82E-01 |
| 206.728.984.375.000 | 11.136 | 11.138 | 0.999085307121277   | 0.99925 | 0.00095400 | 2,75E-01    | 20673 | 0.87686 | 0.87627 | 10.019  | 10.013 | -6,34E-01   | -1,57E-01 |
| 206.759.804.687.500 | 11.153 | 11.152 | 0.999410152435303   | 0.99931 | 0.00038000 | -0.00010100 | 20676 | 0.87658 | 0.87580 | 10.021  | 10.014 | -9,40E-01   | -1,04E-01 |
| 206.789.492.187.500 | 11.159 | 11.165 | 0.998748004436493   | 0.99937 | 0.00034200 | 3,57E-01    | 20679 | 0.87629 | 0.87535 | 10.023  | 10.014 | -0.00012600 | -8,95E-02 |
| 206.819.179.687.500 | 11.173 | 11.179 | 0.998837769031525   | 0.99943 | 0.00059200 | 1,10E-01    | 20682 | 0.87583 | 0.87490 | 10.023  | 10.014 | -0.00014700 | 1,57E-02  |
| 206.850.039.062.500 | 11.195 | 11.193 | 0.999663829803467   | 0.99949 | 0.00040800 | -2,87E-01   | 20685 | 0.87540 | 0.87444 | 10.024  | 10.014 | -0.00011700 | 1,62E-01  |
| 206.879.746.093.750 | 11.198 | 11.207 | 0.998627305030823   | 0.99955 | 0.00041800 | -1,14E-02   | 20688 | 0.87512 | 0.87399 | 10.026  | 10.015 | -4,88E-01   | 2,03E-01  |
| 206.910.605.468.750 | 11.220 | 11.221 | 0.999496936798096   | 0.99961 | 0.00040200 | 1,41E-01    | 20691 | 0.87511 | 0.87352 | 10.031  | 10.015 | 6,25E-02    | 1,31E-01  |
| 206.940.351.562.500 | 11.222 | 11.235 | 0.998346030712128   | 0.99967 | 0.00050300 | 4,94E-01    | 20694 | 0.87516 | 0.87307 | 10.036  | 10.015 | 3,06E-01    | 1,88E-01  |
| 206.971.230.468.750 | 11.251 | 11.250 | 0.999817252159119   | 0.99973 | 0.00070100 | -8,17E-02   | 20697 | 0.87529 | 0.87260 | 10.042  | 10.015 | 0.00012000  | 2,29E-01  |
| 207.002.128.906.250 | 11.265 | 11.264 | 0.999880731105804   | 0.99979 | 0.00045300 | -6,03E-01   | 20700 | 0.87590 | 0.87213 | 10.053  | 10.016 | 0.00017200  | 2,47E-02  |
| 207.031.894.531.250 | 11.278 | 11.279 | 0.999802529811859   | 0.99985 | 0.00033500 | -3,81E-01   | 20703 | 0.87633 | 0.87168 | 10.062  | 10.016 | 0.00013500  | -9,12E-02 |
| 207.062.792.968.750 | 11.286 | 11.293 | 0.999138832092285   | 0.99991 | 0.00022100 | 1,13E-01    | 20706 | 0.87672 | 0.87121 | 10.071  | 10.016 | 0.00011700  | -7,42E-02 |
| 207.093.710.937.500 | 11.292 | 11.308 | 0.998327314853668   | 0.99997 | 0.00040500 | 9,07E-01    | 20709 | 0.87706 | 0.87074 | 10.079  | 10.016 | 8,96E-01    | -1,80E-01 |
| 207.124.648.437.500 | 11.311 | 11.323 | 0.998784422874451   | 10.000  | 0.00078300 | 2,07E-01    | 20712 | 0.87728 | 0.87027 | 10.086  | 10.016 | 5,55E-02    | -4,09E-01 |
| 207.155.585.937.500 | 11.340 | 11.338 | 100.029.420.852.661 | 10.001  | 0.00053400 | -0.00010300 | 20716 | 0.87709 | 0.86980 | 10.089  | 10.016 | -0.00016400 | -5,83E-01 |
| 207.186.542.968.750 | 11.344 | 11.353 | 0.999194264411926   | 10.002  | 0.00014400 | -3,36E-01   | 20719 | 0.87627 | 0.86933 | 10.086  | 10.017 | -0.00035500 | -4,48E-01 |
| 207.217.500.000.000 | 11.349 | 11.369 | 0.998279452323914   | 10.002  | 0.00032600 | 9,76E-01    | 20722 | 0.87489 | 0.86885 | 10.077  | 10.017 | -0.00044100 | -1,62E-01 |
| 207.248.476.562.500 | 11.364 | 11.384 | 0.998285949230194   | 10.003  | 0.00074900 | 5,45E-01    | 20725 | 0.87353 | 0.86838 | 10.068  | 10.017 | -0.00045500 | 3,28E-02  |
| 207.279.453.125.000 | 11.396 | 11.399 | 0.999980151653290   | 10.003  | 0.00066300 | -5,86E-01   | 20728 | 0.87207 | 0.86791 | 10.059  | 10.017 | -0.00042100 | 1,35E-01  |
| 207.310.429.687.500 | 11.405 | 11.415 | 0.999439358711243   | 10.004  | 0.00038600 | -2,20E-01   | 20731 | 0.87093 | 0.86743 | 10.052  | 10.017 | -0.00037200 | 5,37E-02  |
| 207.341.425.781.250 | 11.420 | 11.430 | 0.999401271343231   | 10.005  | 0.00052700 | 2,43E-01    | 20734 | 0.86977 | 0.86696 | 10.045  | 10.017 | -0.00038700 | -1,35E-01 |
| 207.373.593.750.000 | 11.438 | 11.446 | 0.999723672866821   | 10.005  | 0.00054000 | 3,13E-01    | 20737 | 0.86848 | 0.86647 | 10.037  | 10.017 | -0.00045700 | -2,70E-01 |
| 207.404.609.375.000 | 11.454 | 11.462 | 0.999750494956970   | 10.006  | 0.00072500 | -5,46E-02   | 20740 | 0.86688 | 0.86599 | 10.026  | 10.017 | -0.00055800 | -1,52E-01 |
| 207.435.625.000.000 | 11.483 | 11.478 | 100.119.864.940.643 | 10.007  | 0.00050600 | -8,24E-01   | 20744 | 0.86502 | 0.86552 | 10.012  | 10.017 | -0.00055100 | 1,51E-01  |
| 207.467.812.500.000 | 11.486 | 11.494 | 0.999854385852814   | 10.007  | 0.00020400 | 3,83E-01    | 20747 | 0.86340 | 0.86502 | 10.001  | 10.018 | -0.00046300 | 3,21E-01  |
| 207.498.867.187.500 | 11.496 | 11.510 | 0.999377369880676   | 10.008  | 0.00074800 | 0.00011600  | 20750 | 0.86210 | 0.86455 | 0.99930 | 10.018 | -0.00034900 | 3,32E-01  |

|                     |        |        |                     |        |            |             |       |         |         |         |        |             |           |
|---------------------|--------|--------|---------------------|--------|------------|-------------|-------|---------|---------|---------|--------|-------------|-----------|
| 207.531.054.687.500 | 11.533 | 11.527 | 100.145.685.672.760 | 10.008 | 0.00093800 | -6,86E-01   | 20753 | 0.86119 | 0.86405 | 0.99890 | 10.018 | -0.00025200 | 2,23E-01  |
| 207.563.281.250.000 | 11.557 | 11.544 | 100.221.645.832.062 | 10.009 | 0.00030600 | -0.00011500 | 20756 | 0.86047 | 0.86356 | 0.99867 | 10.018 | -0.00020500 | 6,27E-02  |
| 207.594.355.468.750 | 11.552 | 11.560 | 100.023.055.076.599 | 10.010 | 0.00021100 | 3,43E-01    | 20759 | 0.85990 | 0.86308 | 0.99858 | 10.018 | -0.00021300 | -2,07E-01 |
| 207.626.582.031.250 | 11.570 | 11.577 | 100.037.682.056.427 | 10.010 | 0.00052300 | 6,74E-01    | 20763 | 0.85912 | 0.86258 | 0.99830 | 10.018 | -0.00033600 | -3,96E-01 |
| 207.658.828.125.000 | 11.586 | 11.594 | 100.034.880.638.123 | 10.011 | 0.00064600 | 2,26E-01    | 20766 | 0.85773 | 0.86209 | 0.99741 | 10.018 | -0.00046800 | -2,98E-01 |
| 207.689.921.875.000 | 11.611 | 11.610 | 100.125.491.619.110 | 10.012 | 0.00066600 | -6,99E-01   | 20769 | 0.85616 | 0.86161 | 0.99631 | 10.018 | -0.00052500 | 2,22E-02  |
| 207.722.187.500.000 | 11.628 | 11.627 | 100.134.205.818.176 | 10.012 | 0.00020300 | -2,27E-01   | 20772 | 0.85441 | 0.86111 | 0.99505 | 10.018 | -0.00045400 | 3,33E-01  |
| 207.754.472.656.250 | 11.624 | 11.644 | 0.999259114265442   | 10.013 | 0.00051900 | 0.00011700  | 20775 | 0.85323 | 0.86062 | 0.99437 | 10.018 | -0.00030900 | 3,98E-01  |
| 207.786.757.812.500 | 11.662 | 11.662 | 100.137.364.864.349 | 10.014 | 0.00095800 | 1,94E-01    | 20779 | 0.85241 | 0.86012 | 0.99404 | 10.017 | -0.00019700 | 3,26E-01  |
| 207.819.042.968.750 | 11.686 | 11.679 | 100.210.607.051.849 | 10.014 | 0.00064500 | -7,76E-01   | 20782 | 0.85196 | 0.85963 | 0.99408 | 10.017 | -9,89E-01   | 3,72E-01  |
| 207.851.347.656.250 | 11.703 | 11.697 | 100.218.284.130.096 | 10.015 | 0.00045700 | -1,09E-01   | 20785 | 0.85177 | 0.85913 | 0.99438 | 10.017 | 4,34E-01    | 4,55E-01  |
| 207.883.671.875.000 | 11.715 | 11.714 | 100.168.335.437.775 | 10.016 | 0.00057400 | 1,96E-01    | 20788 | 0.85224 | 0.85863 | 0.99534 | 10.017 | 0.00019500  | 4,23E-01  |
| 207.917.148.437.500 | 11.741 | 11.733 | 100.251.054.763.794 | 10.016 | 0.00058500 | -3,32E-01   | 20792 | 0.85306 | 0.85812 | 0.99666 | 10.017 | 0.00032200  | 3,32E-01  |
| 207.949.492.187.500 | 11.754 | 11.750 | 100.206.685.066.223 | 10.017 | 0.00035600 | -3,16E-01   | 20795 | 0.85436 | 0.85762 | 0.99845 | 10.017 | 0.00041400  | 1,44E-01  |
| 207.981.835.937.500 | 11.764 | 11.768 | 100.138.485.431.671 | 10.018 | 0.00038100 | 5,44E-01    | 20798 | 0.85573 | 0.85712 | 10.003  | 10.017 | 0.00041500  | -8,09E-02 |
| 208.014.179.687.500 | 11.778 | 11.786 | 100.108.647.346.497 | 10.019 | 0.00070800 | 0.00010200  | 20801 | 0.85704 | 0.85663 | 10.021  | 10.017 | 0.00036200  | -2,72E-01 |
| 208.047.714.843.750 | 11.811 | 11.805 | 100.252.342.224.121 | 10.019 | 0.00105000 | -3,01E-01   | 20805 | 0.85812 | 0.85611 | 10.037  | 10.017 | 0.00023600  | -4,09E-01 |
| 208.080.078.125.000 | 11.848 | 11.823 | 100.446.641.445.160 | 10.020 | 0.00050900 | -0.00012100 | 20808 | 0.85860 | 0.85561 | 10.047  | 10.017 | 9,19E-01    | -4,67E-01 |
| 208.113.632.812.500 | 11.844 | 11.842 | 100.232.005.119.324 | 10.021 | 0.00025500 | 1,39E-02    | 20811 | 0.85872 | 0.85510 | 10.053  | 10.017 | -7,22E-01   | -5,02E-01 |
| 208.146.035.156.250 | 11.865 | 11.860 | 100.256.729.125.977 | 10.022 | 0.00051800 | 3,46E-01    | 20815 | 0.85812 | 0.85460 | 10.052  | 10.016 | -0.00023900 | -3,44E-01 |
| 208.179.589.843.750 | 11.879 | 11.879 | 100.214.266.777.039 | 10.022 | 0.00048300 | 3,95E-01    | 20818 | 0.85714 | 0.85409 | 10.047  | 10.016 | -0.00029900 | -6,14E-02 |
| 208.212.011.718.750 | 11.896 | 11.898 | 100.213.944.911.957 | 10.023 | 0.00077900 | 2,53E-01    | 20821 | 0.85615 | 0.85359 | 10.042  | 10.016 | -0.00028000 | 1,31E-01  |
| 208.245.605.468.750 | 11.930 | 11.917 | 100.364.995.002.747 | 10.024 | 0.00065000 | -3,44E-01   | 20825 | 0.85530 | 0.85308 | 10.038  | 10.016 | -0.00021300 | 2,29E-01  |
| 208.279.199.218.750 | 11.940 | 11.937 | 100.279.164.314.270 | 10.025 | 0.00054800 | -9,03E-02   | 20828 | 0.85472 | 0.85256 | 10.037  | 10.016 | -0.00012600 | 2,84E-01  |
| 208.311.640.625.000 | 11.966 | 11.955 | 100.359.821.319.580 | 10.025 | 0.00059100 | 1,33E-01    | 20831 | 0.85446 | 0.85207 | 10.040  | 10.016 | -2,54E-01   | 2,09E-01  |
| 208.345.273.437.500 | 11.979 | 11.975 | 100.300.443.172.455 | 10.026 | 0.00063600 | 1,33E-01    | 20835 | 0.85455 | 0.85155 | 10.046  | 10.016 | 1,23E-01    | 9,29E-02  |
| 208.378.906.250.000 | 12.009 | 11.995 | 100.410.068.035.126 | 10.027 | 0.00068000 | -2,16E-02   | 20838 | 0.85455 | 0.85104 | 10.050  | 10.015 | 3,71E-01    | -7,92E-03 |
| 208.412.539.062.500 | 12.025 | 12.014 | 100.378.775.596.619 | 10.027 | 0.00062100 | 3,61E-02    | 20841 | 0.85480 | 0.85053 | 10.058  | 10.015 | 6,92E-02    | -2,19E-01 |
| 208.446.191.406.250 | 12.051 | 12.034 | 100.446.987.152.100 | 10.028 | 0.00070400 | -2,30E-01   | 20845 | 0.85459 | 0.85001 | 10.061  | 10.015 | -0.00011000 | -3,12E-01 |
| 208.479.863.281.250 | 12.072 | 12.054 | 100.469.946.861.267 | 10.029 | 0.00046600 | -3,09E-01   | 20848 | 0.85406 | 0.84950 | 10.060  | 10.015 | -0.00020300 | -2,21E-01 |
| 208.513.535.156.250 | 12.082 | 12.074 | 100.375.878.810.883 | 10.030 | 0.00049600 | 5,07E-02    | 20851 | 0.85322 | 0.84899 | 10.057  | 10.015 | -0.00025900 | -1,06E-01 |
| 208.547.226.562.500 | 12.106 | 12.094 | 100.417.363.643.646 | 10.030 | 0.00050000 | -8,82E-02   | 20855 | 0.85231 | 0.84848 | 10.053  | 10.014 | -0.00027500 | -6,11E-02 |
| 208.580.917.968.750 | 12.116 | 12.115 | 100.324.165.821.075 | 10.031 | 0.00043700 | -1,69E-04   | 20858 | 0.85137 | 0.84797 | 10.048  | 10.014 | -0.00030000 | -2,75E-02 |
| 208.615.781.250.000 | 12.136 | 12.136 | 100.319.468.975.067 | 10.032 | 0.00050000 | 3,82E-01    | 20862 | 0.85026 | 0.84744 | 10.042  | 10.014 | -0.00029300 | -2,54E-02 |
| 208.649.511.718.750 | 12.150 | 12.156 | 100.267.779.827.118 | 10.033 | 0.00069800 | 6,04E-01    | 20865 | 0.84936 | 0.84693 | 10.038  | 10.014 | -0.00031700 | -1,05E-01 |

|                     |        |        |                     |        |            |             |       |         |         |         |        |             |           |
|---------------------|--------|--------|---------------------|--------|------------|-------------|-------|---------|---------|---------|--------|-------------|-----------|
| 208.683.242.187.500 | 12.183 | 12.176 | 100.396.060.943.604 | 10.033 | 0.00090700 | -2,49E-01   | 20868 | 0.84812 | 0.84642 | 10.031  | 10.014 | -0.00036500 | -8,82E-02 |
| 208.718.144.531.250 | 12.212 | 12.198 | 100.487.112.998.962 | 10.034 | 0.00052700 | -8,04E-01   | 20872 | 0.84686 | 0.84589 | 10.023  | 10.013 | -0.00037800 | -5,02E-02 |
| 208.751.894.531.250 | 12.219 | 12.218 | 100.352.835.655.212 | 10.035 | 0.00035500 | 5,79E-01    | 20875 | 0.84552 | 0.84538 | 10.015  | 10.013 | -0.00039900 | -4,39E-02 |
| 208.785.664.062.500 | 12.236 | 12.239 | 100.326.478.481.293 | 10.035 | 0.00091800 | 7,41E-01    | 20879 | 0.84417 | 0.84487 | 10.006  | 10.013 | -0.00040800 | 2,42E-02  |
| 208.820.585.937.500 | 12.282 | 12.261 | 100.574.314.594.269 | 10.036 | 0.00086400 | -0.00010100 | 20882 | 0.84272 | 0.84435 | 0.99965 | 10.013 | -0.00038200 | 8,83E-02  |
| 208.855.546.875.000 | 12.297 | 12.282 | 100.512.337.684.631 | 10.037 | 0.00021100 | -7,41E-01   | 20886 | 0.84149 | 0.84382 | 0.99892 | 10.013 | -0.00034600 | 1,05E-01  |
| 208.889.335.937.500 | 12.297 | 12.303 | 100.305.891.036.987 | 10.037 | 0.00035500 | 8,18E-01    | 20889 | 0.84034 | 0.84332 | 0.99826 | 10.012 | -0.00031000 | 8,41E-02  |
| 208.924.316.406.250 | 12.321 | 12.325 | 100.341.343.879.700 | 10.038 | 0.00077300 | 5,51E-01    | 20892 | 0.83936 | 0.84279 | 0.99777 | 10.012 | -0.00028800 | 1,05E-02  |
| 208.959.296.875.000 | 12.351 | 12.347 | 100.422.585.010.529 | 10.038 | 0.00074000 | -1,93E-01   | 20896 | 0.83833 | 0.84227 | 0.99724 | 10.012 | -0.00030300 | -1,25E-02 |
| 208.993.144.531.250 | 12.372 | 12.368 | 100.431.597.232.819 | 10.039 | 0.00064100 | -3,98E-01   | 20899 | 0.83727 | 0.84177 | 0.99667 | 10.012 | -0.00029700 | 1,25E-01  |
| 209.028.144.531.250 | 12.395 | 12.390 | 100.442.314.147.949 | 10.040 | 0.00046600 | -3,65E-01   | 20903 | 0.83629 | 0.84125 | 0.99618 | 10.011 | -0.00021700 | 2,71E-01  |
| 209.063.164.062.500 | 12.405 | 12.412 | 100.327.765.941.620 | 10.040 | 0.00038500 | 2,26E-01    | 20906 | 0.83575 | 0.84073 | 0.99614 | 10.011 | -0.00010700 | 2,92E-01  |
| 209.098.203.125.000 | 12.422 | 12.434 | 100.279.748.439.789 | 10.041 | 0.00062500 | 4,19E-01    | 20910 | 0.83554 | 0.84021 | 0.99642 | 10.011 | -1,29E-01   | 2,63E-01  |
| 209.133.242.187.500 | 12.449 | 12.457 | 100.331.175.327.301 | 10.041 | 0.00067900 | 3,10E-01    | 20913 | 0.83566 | 0.83969 | 0.99704 | 10.011 | 7,75E-01    | 1,78E-01  |
| 209.168.300.781.250 | 12.469 | 12.479 | 100.318.944.454.193 | 10.042 | 0.00084300 | 9,15E-02    | 20917 | 0.83608 | 0.83917 | 0.99796 | 10.010 | 0.00011200  | 3,88E-02  |
| 209.203.378.906.250 | 12.508 | 12.501 | 100.483.226.776.123 | 10.042 | 0.00074300 | -4,85E-01   | 20920 | 0.83644 | 0.83865 | 0.99881 | 10.010 | 0.00010500  | -3,85E-02 |
| 209.238.457.031.250 | 12.521 | 12.524 | 100.399.315.357.208 | 10.042 | 0.00050200 | -1,60E-02   | 20924 | 0.83682 | 0.83814 | 0.99968 | 10.010 | 8,48E-01    | -7,56E-02 |
| 209.273.554.687.500 | 12.543 | 12.547 | 100.392.544.269.562 | 10.043 | 0.00073200 | 1,45E-01    | 20927 | 0.83704 | 0.83762 | 10.004  | 10.010 | 5,17E-01    | -1,02E-01 |
| 209.308.652.343.750 | 12.573 | 12.569 | 100.467.956.066.132 | 10.043 | 0.00060400 | -2,88E-01   | 20931 | 0.83718 | 0.83711 | 10.010  | 10.010 | 1,33E-01    | -1,27E-01 |
| 209.344.941.406.250 | 12.586 | 12.593 | 100.368.988.513.947 | 10.044 | 0.00052600 | 1,20E-01    | 20934 | 0.83713 | 0.83658 | 10.015  | 10.009 | -3,90E-01   | -1,29E-01 |
| 209.380.078.125.000 | 12.610 | 12.616 | 100.387.024.879.456 | 10.044 | 0.00069000 | 1,35E-01    | 20938 | 0.83690 | 0.83607 | 10.017  | 10.009 | -7,87E-01   | -1,48E-01 |
| 209.415.214.843.750 | 12.635 | 12.638 | 100.402.319.431.305 | 10.044 | 0.00062100 | -5,06E-01   | 20942 | 0.83658 | 0.83556 | 10.019  | 10.009 | -0.00014300 | -1,43E-01 |
| 209.451.542.968.750 | 12.655 | 12.662 | 100.369.834.899.902 | 10.044 | 0.00032900 | 7,21E-02    | 20945 | 0.83588 | 0.83504 | 10.017  | 10.009 | -0.00018100 | -3,52E-02 |
| 209.486.699.218.750 | 12.658 | 12.685 | 100.173.997.879.028 | 10.045 | 0.00067300 | 9,21E-01    | 20949 | 0.83529 | 0.83453 | 10.016  | 10.008 | -0.00016800 | 1,51E-02  |
| 209.523.046.875.000 | 12.703 | 12.709 | 100.385.451.316.834 | 10.045 | 0.00098700 | -1,43E-01   | 20952 | 0.83468 | 0.83400 | 10.015  | 10.008 | -0.00017000 | -6,19E-03 |
| 209.558.242.187.500 | 12.729 | 12.732 | 100.412.642.955.780 | 10.045 | 0.00057000 | -6,24E-01   | 20956 | 0.83407 | 0.83350 | 10.014  | 10.008 | -0.00017300 | 9,49E-03  |
| 209.594.609.375.000 | 12.744 | 12.756 | 100.323.796.272.278 | 10.045 | 0.00054100 | 4,31E-01    | 20959 | 0.83344 | 0.83298 | 10.012  | 10.008 | -0.00016400 | 4,56E-02  |
| 209.629.824.218.750 | 12.767 | 12.780 | 100.327.754.020.691 | 10.045 | 0.00087900 | 2,56E-01    | 20963 | 0.83290 | 0.83248 | 10.012  | 10.008 | -0.00014000 | 5,56E-02  |
| 209.666.230.468.750 | 12.807 | 12.804 | 100.479.078.292.847 | 10.045 | 0.00072400 | -8,30E-01   | 20967 | 0.83244 | 0.83196 | 10.012  | 10.007 | -0.00012400 | 9,11E-02  |
| 209.702.636.718.750 | 12.820 | 12.828 | 100.370.955.467.224 | 10.045 | 0.00027500 | -3,35E-02   | 20970 | 0.83200 | 0.83144 | 10.013  | 10.007 | -7,37E-01   | 1,73E-01  |
| 209.739.082.031.250 | 12.827 | 12.852 | 100.192.725.658.417 | 10.045 | 0.00070000 | 0.00010300  | 20974 | 0.83190 | 0.83093 | 10.017  | 10.007 | 2,48E-02    | 1,56E-01  |
| 209.774.335.937.500 | 12.870 | 12.876 | 100.391.912.460.327 | 10.045 | 0.00101000 | 1,30E-01    | 20977 | 0.83201 | 0.83043 | 10.023  | 10.007 | 3,80E-01    | 1,32E-02  |
| 209.810.781.250.000 | 12.899 | 12.900 | 100.435.900.688.171 | 10.045 | 0.00079300 | -6,43E-01   | 20981 | 0.83217 | 0.82992 | 10.029  | 10.007 | 1,19E-01    | -1,26E-01 |
| 209.847.246.093.750 | 12.928 | 12.925 | 100.477.027.893.066 | 10.044 | 0.00054400 | -2,57E-01   | 20985 | 0.83210 | 0.82940 | 10.033  | 10.006 | -5,36E-01   | -1,85E-01 |
| 209.883.730.468.750 | 12.939 | 12.949 | 100.337.135.791.779 | 10.044 | 0.00060600 | 4,89E-01    | 20988 | 0.83178 | 0.82889 | 10.035  | 10.006 | -0.00012300 | -1,57E-01 |

|                     |        |        |                     |        |            |           |       |         |         |         |         |             |           |
|---------------------|--------|--------|---------------------|--------|------------|-----------|-------|---------|---------|---------|---------|-------------|-----------|
| 209.920.214.843.750 | 12.972 | 12.974 | 100.421.297.550.201 | 10.044 | 0.00090100 | 1,56E-01  | 20992 | 0.83120 | 0.82839 | 10.034  | 10.006  | -0.00016800 | -7,31E-02 |
| 209.956.718.750.000 | 13.005 | 12.999 | 100.494.444.370.270 | 10.043 | 0.00071900 | -4,75E-01 | 20996 | 0.83056 | 0.82788 | 10.033  | 10.006  | -0.00017600 | -6,52E-02 |
| 209.993.242.187.500 | 13.025 | 13.024 | 100.444.245.338.440 | 10.043 | 0.00055400 | -1,18E-01 | 20999 | 0.82992 | 0.82737 | 10.031  | 10.006  | -0.00021600 | -8,90E-02 |
| 210.029.765.625.000 | 13.045 | 13.048 | 100.394.415.855.408 | 10.043 | 0.00063300 | 1,98E-01  | 21003 | 0.82898 | 0.82686 | 10.027  | 10.006  | -0.00024100 | 1,76E-02  |
| 210.067.480.468.750 | 13.072 | 13.074 | 100.399.005.413.055 | 10.042 | 0.00070100 | -3,83E-01 | 21007 | 0.82813 | 0.82634 | 10.023  | 10.005  | -0.00020200 | 6,51E-02  |
| 210.104.042.968.750 | 13.097 | 13.099 | 100.397.455.692.291 | 10.042 | 0.00034800 | -5,29E-02 | 21010 | 0.82748 | 0.82584 | 10.022  | 10.005  | -0.00019300 | -4,98E-02 |
| 210.140.605.468.750 | 13.097 | 13.124 | 100.142.168.998.718 | 10.041 | 0.00066200 | 6,91E-01  | 21014 | 0.82671 | 0.82533 | 10.019  | 10.005  | -0.00023900 | -1,04E-01 |
| 210.178.359.375.000 | 13.146 | 13.150 | 100.367.391.109.467 | 10.040 | 0.00086200 | 6,58E-02  | 21018 | 0.82570 | 0.82482 | 10.014  | 10.005  | -0.00027000 | -2,51E-02 |
| 210.214.960.937.500 | 13.161 | 13.175 | 100.258.731.842.041 | 10.039 | 0.00071100 | 7,75E-03  | 21021 | 0.82470 | 0.82431 | 10.009  | 10.005  | -0.00025800 | 1,94E-02  |
| 210.251.562.500.000 | 13.198 | 13.200 | 100.369.334.220.886 | 10.039 | 0.00086800 | 1,72E-01  | 21025 | 0.82382 | 0.82381 | 10.005  | 10.005  | -0.00025600 | -7,40E-04 |
| 210.289.375.000.000 | 13.226 | 13.226 | 100.375.270.843.506 | 10.038 | 0.00083900 | -1,72E-01 | 21029 | 0.82280 | 0.82330 | 0.99994 | 10.004  | -0.00025800 | 9,42E-04  |
| 210.325.996.093.750 | 13.261 | 13.252 | 100.462.055.206.299 | 10.037 | 0.00074000 | -3,21E-01 | 21033 | 0.82190 | 0.82280 | 0.99952 | 10.004  | -0.00025500 | -2,83E-02 |
| 210.363.828.125.000 | 13.281 | 13.278 | 100.392.031.669.617 | 10.036 | 0.00060000 | 3,94E-02  | 21036 | 0.82089 | 0.82228 | 0.99901 | 10.004  | -0.00027900 | -1,14E-02 |
| 210.401.679.687.500 | 13.306 | 13.304 | 100.371.134.281.158 | 10.035 | 0.00076900 | 1,61E-01  | 21040 | 0.81978 | 0.82177 | 0.99839 | 10.004  | -0.00026400 | 8,44E-02  |
| 210.438.339.843.750 | 13.338 | 13.330 | 100.426.638.126.373 | 10.034 | 0.00072000 | -1,11E-01 | 21044 | 0.81893 | 0.82127 | 0.99802 | 10.004  | -0.00021600 | 1,33E-01  |
| 210.476.210.937.500 | 13.360 | 13.356 | 100.366.568.565.369 | 10.033 | 0.00068700 | 2,98E-01  | 21048 | 0.81817 | 0.82075 | 0.99775 | 10.003  | -0.00016500 | 1,29E-01  |
| 210.514.101.562.500 | 13.390 | 13.382 | 100.394.678.115.845 | 10.031 | 0.00094500 | -5,67E-02 | 21051 | 0.81768 | 0.82024 | 0.99775 | 10.003  | -0.00011900 | 5,70E-02  |
| 210.551.992.187.500 | 13.432 | 13.409 | 100.528.252.124.786 | 10.030 | 0.00064400 | -8,51E-01 | 21055 | 0.81727 | 0.81973 | 0.99783 | 10.003  | -0.00012200 | 2,01E-03  |
| 210.588.710.937.500 | 13.438 | 13.435 | 100.326.704.978.943 | 10.029 | 0.00031000 | 1,29E-01  | 21059 | 0.81677 | 0.81923 | 0.99781 | 10.003  | -0.00011700 | 8,57E-02  |
| 210.626.640.625.000 | 13.455 | 13.461 | 100.209.307.670.593 | 10.028 | 0.00074000 | 7,96E-01  | 21063 | 0.81639 | 0.81872 | 0.99792 | 10.002  | -5,76E-01   | 1,32E-01  |
| 210.664.570.312.500 | 13.495 | 13.488 | 100.326.430.797.577 | 10.026 | 0.00091400 | -1,73E-01 | 21066 | 0.81633 | 0.81821 | 0.99835 | 10.002  | -1,72E-01   | 1,43E-02  |
| 210.702.539.062.500 | 13.524 | 13.515 | 100.338.792.800.903 | 10.025 | 0.00060900 | -2,50E-01 | 21070 | 0.81626 | 0.81770 | 0.99877 | 10.002  | -4,68E-01   | -1,29E-02 |
| 210.740.488.281.250 | 13.541 | 13.542 | 100.221.931.934.357 | 10.023 | 0.00072500 | 3,77E-01  | 21074 | 0.81598 | 0.81719 | 0.99897 | 10.002  | -2,69E-01   | 9,59E-02  |
| 210.778.476.562.500 | 13.579 | 13.569 | 100.319.778.919.220 | 10.022 | 0.00089500 | -1,55E-01 | 21078 | 0.81606 | 0.81668 | 0.99953 | 10.001  | 2,60E-01    | 5,95E-02  |
| 210.817.656.250.000 | 13.610 | 13.597 | 100.331.914.424.896 | 10.020 | 0.00060500 | -2,59E-01 | 21082 | 0.81618 | 0.81615 | 10.001  | 10.001  | 1,90E-01    | -6,13E-02 |
| 210.855.664.062.500 | 13.626 | 13.624 | 100.203.645.229.340 | 10.019 | 0.00069500 | 2,18E-01  | 21086 | 0.81621 | 0.81564 | 10.007  | 10.001  | -2,13E-01   | -9,33E-02 |
| 210.893.691.406.250 | 13.663 | 13.651 | 100.283.753.871.918 | 10.017 | 0.00077100 | -8,22E-03 | 21089 | 0.81602 | 0.81513 | 10.010  | 10.001  | -5,20E-01   | -6,55E-02 |
| 210.931.718.750.000 | 13.684 | 13.679 | 100.210.952.758.789 | 10.015 | 0.00068900 | -2,49E-01 | 21093 | 0.81581 | 0.81462 | 10.012  | 10.000  | -7,11E-01   | -8,78E-02 |
| 210.970.957.031.250 | 13.716 | 13.707 | 100.225.317.478.180 | 10.014 | 0.00057900 | 2,26E-02  | 21097 | 0.81547 | 0.81409 | 10.014  | 100.000 | -0.00012000 | -8,26E-02 |
| 211.009.023.437.500 | 13.729 | 13.734 | 100.064.945.220.947 | 10.012 | 0.00070700 | 2,36E-01  | 21101 | 0.81488 | 0.81358 | 10.013  | 0.99997 | -0.00013500 | -3,34E-02 |
| 211.047.089.843.750 | 13.770 | 13.762 | 100.176.417.827.606 | 10.010 | 0.00075800 | 1,44E-01  | 21105 | 0.81444 | 0.81307 | 10.013  | 0.99993 | -0.00014500 | -9,71E-02 |
| 211.086.367.187.500 | 13.788 | 13.791 | 100.052.905.082.703 | 10.008 | 0.00081800 | 2,89E-02  | 21109 | 0.81376 | 0.81254 | 10.011  | 0.99990 | -0.00021000 | -1,36E-01 |
| 211.124.472.656.250 | 13.833 | 13.818 | 100.208.389.759.064 | 10.006 | 0.00078100 | -4,95E-01 | 21112 | 0.81282 | 0.81203 | 10.006  | 0.99986 | -0.00025000 | -1,64E-03 |
| 211.163.789.062.500 | 13.848 | 13.847 | 100.053.429.603.577 | 10.004 | 0.00043500 | 9,60E-02  | 21116 | 0.81182 | 0.81150 | 10.001  | 0.99982 | -0.00021100 | 1,10E-01  |
| 211.203.125.000.000 | 13.867 | 13.876 | 0.999343752861023   | 10.002 | 0.00085600 | 5,53E-01  | 21120 | 0.81115 | 0.81097 | 0.99996 | 0.99978 | -0.00016400 | 8,01E-02  |

|                     |        |        |                     |         |            |           |       |         |         |         |         |             |           |
|---------------------|--------|--------|---------------------|---------|------------|-----------|-------|---------|---------|---------|---------|-------------|-----------|
| 211.241.269.531.250 | 13.915 | 13.904 | 100.107.741.355.896 | 10.000  | 0.00086300 | -1,22E-01 | 21124 | 0.81056 | 0.81046 | 0.99984 | 0.99974 | -0.00014900 | 4,11E-02  |
| 211.280.625.000.000 | 13.934 | 13.933 | 0.999918878078461   | 0.99983 | 0.00076200 | 1,20E-01  | 21128 | 0.81000 | 0.80993 | 0.99976 | 0.99970 | -0.00013200 | 2,14E-02  |
| 211.320.000.000.000 | 13.975 | 13.962 | 100.083.851.814.270 | 0.99962 | 0.00095800 | -4,73E-02 | 21132 | 0.80952 | 0.80940 | 0.99977 | 0.99965 | -0.00013200 | -1,25E-02 |
| 211.358.183.593.750 | 14.008 | 13.991 | 100.117.874.145.508 | 0.99942 | 0.00072500 | -4,41E-01 | 21136 | 0.80897 | 0.80889 | 0.99969 | 0.99961 | -0.00014100 | -2,51E-02 |
| 211.397.578.125.000 | 14.031 | 14.020 | 100.027.084.350.586 | 0.99920 | 0.00061600 | -1,31E-01 | 21140 | 0.80842 | 0.80836 | 0.99962 | 0.99956 | -0.00015200 | 2,54E-03  |
| 211.436.992.187.500 | 14.057 | 14.050 | 0.999716579914093   | 0.99899 | 0.00062200 | -1,17E-01 | 21144 | 0.80777 | 0.80783 | 0.99945 | 0.99951 | -0.00013900 | 2,70E-02  |
| 211.476.425.781.250 | 14.080 | 14.079 | 0.998830020427704   | 0.99877 | 0.00052400 | 1,90E-01  | 21148 | 0.80732 | 0.80729 | 0.99949 | 0.99946 | -0.00013100 | 1,83E-02  |
| 211.515.859.375.000 | 14.098 | 14.109 | 0.997478246688843   | 0.99855 | 0.00077200 | 6,05E-01  | 21152 | 0.80674 | 0.80676 | 0.99938 | 0.99940 | -0.00012500 | 3,91E-02  |
| 211.555.332.031.250 | 14.141 | 14.139 | 0.998523056507111   | 0.99833 | 0.00100000 | -8,21E-03 | 21156 | 0.80634 | 0.80623 | 0.99946 | 0.99935 | -9,99E-01   | 1,52E-02  |
| 211.594.804.687.500 | 14.177 | 14.169 | 0.998957693576813   | 0.99811 | 0.00076500 | -4,20E-01 | 21159 | 0.80595 | 0.80569 | 0.99955 | 0.99929 | -0.00011300 | -4,48E-02 |
| 211.634.277.343.750 | 14.201 | 14.199 | 0.998115718364716   | 0.99788 | 0.00067000 | -2,46E-01 | 21163 | 0.80544 | 0.80516 | 0.99952 | 0.99923 | -0.00013500 | -2,73E-03 |
| 211.673.789.062.500 | 14.230 | 14.229 | 0.997770190238953   | 0.99766 | 0.00057100 | 2,66E-01  | 21167 | 0.80488 | 0.80462 | 0.99943 | 0.99917 | -0.00011500 | 2,22E-02  |
| 211.714.511.718.750 | 14.247 | 14.260 | 0.996092259883881   | 0.99742 | 0.00088300 | 6,76E-01  | 21171 | 0.80452 | 0.80407 | 0.99955 | 0.99910 | -0.00011700 | -5,80E-02 |
| 211.754.042.968.750 | 14.301 | 14.291 | 0.998224675655365   | 0.99719 | 0.00111000 | -2,48E-01 | 21175 | 0.80394 | 0.80353 | 0.99945 | 0.99904 | -0.00016200 | -6,86E-02 |
| 211.793.593.750.000 | 14.335 | 14.321 | 0.998340666294098   | 0.99696 | 0.00068600 | -6,50E-01 | 21179 | 0.80324 | 0.80299 | 0.99922 | 0.99897 | -0.00017200 | -4,40E-03 |
| 211.833.144.531.250 | 14.355 | 14.352 | 0.997069418430328   | 0.99673 | 0.00059900 | -7,27E-02 | 21183 | 0.80258 | 0.80245 | 0.99903 | 0.99890 | -0.00016500 | -7,21E-03 |
| 211.873.925.781.250 | 14.383 | 14.384 | 0.996441900730133   | 0.99649 | 0.00062800 | 9,94E-02  | 21187 | 0.80191 | 0.80189 | 0.99885 | 0.99882 | -0.00017700 | 9,69E-03  |
| 211.913.515.625.000 | 14.406 | 14.415 | 0.995375633239746   | 0.99625 | 0.00067900 | 2,67E-01  | 21191 | 0.80116 | 0.80134 | 0.99856 | 0.99874 | -0.00015700 | 2,39E-02  |
| 211.954.335.937.500 | 14.438 | 14.447 | 0.995133221149445   | 0.99601 | 0.00084200 | 3,06E-01  | 21195 | 0.80065 | 0.80078 | 0.99853 | 0.99866 | -0.00015800 | -5,08E-02 |
| 211.993.945.312.500 | 14.474 | 14.478 | 0.995353698730469   | 0.99578 | 0.00092500 | -7,79E-02 | 21199 | 0.79988 | 0.80024 | 0.99823 | 0.99858 | -0.00019800 | -6,22E-02 |
| 212.034.785.156.250 | 14.512 | 14.510 | 0.995751023292542   | 0.99553 | 0.00078000 | -3,52E-01 | 21203 | 0.79905 | 0.79967 | 0.99788 | 0.99850 | -0.00020800 | -1,40E-02 |
| 212.074.453.125.000 | 14.536 | 14.542 | 0.994776487350464   | 0.99530 | 0.00064200 | -2,62E-01 | 21207 | 0.79821 | 0.79912 | 0.99749 | 0.99841 | -0.00021000 | 5,13E-02  |
| 212.115.312.500.000 | 14.564 | 14.574 | 0.994037091732025   | 0.99505 | 0.00056800 | 3,86E-01  | 21212 | 0.79737 | 0.79855 | 0.99713 | 0.99832 | -0.00016700 | 1,04E-01  |
| 212.156.210.937.500 | 14.583 | 14.607 | 0.992410600185394   | 0.99481 | 0.00095800 | 5,39E-01  | 21216 | 0.79684 | 0.79799 | 0.99708 | 0.99822 | -0.00012500 | 7,73E-02  |
| 212.195.898.437.500 | 14.641 | 14.639 | 0.994816541671753   | 0.99457 | 0.00100000 | -5,14E-01 | 21220 | 0.79636 | 0.79743 | 0.99706 | 0.99813 | -0.00010500 | 4,19E-02  |
| 212.236.835.937.500 | 14.664 | 14.672 | 0.993526875972748   | 0.99433 | 0.00054300 | -2,87E-01 | 21224 | 0.79600 | 0.79686 | 0.99717 | 0.99803 | -9,11E-01   | 3,60E-02  |
| 212.277.753.906.250 | 14.686 | 14.705 | 0.992162644863129   | 0.99409 | 0.00076800 | 3,03E-01  | 21228 | 0.79562 | 0.79628 | 0.99726 | 0.99792 | -7,51E-01   | -2,20E-02 |
| 212.318.710.937.500 | 14.727 | 14.738 | 0.992683887481689   | 0.99385 | 0.00079100 | -1,72E-01 | 21232 | 0.79538 | 0.79571 | 0.99750 | 0.99782 | -0.00010900 | -7,73E-02 |
| 212.359.687.500.000 | 14.750 | 14.772 | 0.991485416889191   | 0.99360 | 0.00062700 | -5,47E-02 | 21236 | 0.79472 | 0.79513 | 0.99730 | 0.99771 | -0.00013900 | -1,17E-02 |
| 212.399.453.125.000 | 14.777 | 14.804 | 0.990665256977081   | 0.99337 | 0.00074700 | 4,42E-01  | 21240 | 0.79427 | 0.79456 | 0.99730 | 0.99760 | -0.00011800 | 2,22E-02  |
| 212.440.449.218.750 | 14.811 | 14.838 | 0.990409731864929   | 0.99313 | 0.00098400 | 1,05E-01  | 21244 | 0.79377 | 0.79398 | 0.99727 | 0.99748 | -0.00012100 | 3,75E-02  |
| 212.482.675.781.250 | 14.859 | 14.873 | 0.991500020027161   | 0.99289 | 0.00083400 | -3,04E-01 | 21248 | 0.79326 | 0.79338 | 0.99724 | 0.99736 | -8,73E-01   | 7,96E-02  |
| 212.523.710.937.500 | 14.880 | 14.907 | 0.989973366260529   | 0.99265 | 0.00073100 | 1,35E-01  | 21252 | 0.79304 | 0.79279 | 0.99748 | 0.99723 | -5,44E-01   | 4,00E-02  |
| 212.564.746.093.750 | 14.919 | 14.941 | 0.990193605422974   | 0.99241 | 0.00094500 | 5,23E-01  | 21256 | 0.79282 | 0.79220 | 0.99772 | 0.99711 | -5,45E-01   | -2,07E-04 |
