# Supplementary material
Source: PubMed Central journal article supplement (PMC8325642)
Supplement: NIHMS1698257-supplement-Fig__4A__Insertase_pH8.pdf [file NIHMS1698257-supplement-Fig__4A__Insertase_pH8.pdf]

| Energy              | Mo Foil | nbkg        | Flat        | fbkg        | nder        | nsec      | H         | Energy | Insertase-201604-pH8 | nbkg        | flat        | fbkg        | nder        | nsec        |
|---------------------|---------|-------------|-------------|-------------|-------------|-----------|-----------|--------|----------------------|-------------|-------------|-------------|-------------|-------------|
| 196.910.605.468.750 |         | 0.0019600   | 0.0019600   | 0.0019600   | 0.0019600   | -4,11E-01 | -3,92E-03 | 19691  | 0.0022500            | 0.0022500   | 0.0022500   | 0.0022500   | 0.00058300  | -0.00015100 |
| 196.950.957.031.250 |         | 0.0018000   | 0.0018000   | 0.0018000   | 0.0018000   | -4,26E-01 | -3,04E-03 | 19695  | 0.0046000            | 0.0046000   | 0.0046000   | 0.0046000   | -2,78E-01   | -0.00013200 |
| 196.991.308.593.750 |         | 0.0016200   | 0.0016200   | 0.0016200   | 0.0016200   | -4,35E-01 | -1,54E-02 | 19699  | 0.0020200            | 0.0020200   | 0.0020200   | 0.0020200   | -0.00047900 | -5,65E-02   |
| 197.031.699.218.750 |         | 0.0014500   | 0.0014500   | 0.0014500   | 0.0014500   | -5,51E-01 | -7,22E-03 | 19703  | 0.00072800           | 0.00072800  | 0.00072800  | 0.00072800  | -7,34E-01   | 6,24E-01    |
| 197.073.125.000.000 |         | 0.0011700   | 0.0011700   | 0.0011700   | 0.0011700   | -4,94E-01 | 2,90E-02  | 19707  | 0.0014200            | 0.0014200   | 0.0014200   | 0.0014200   | 3,11E-01    | 3,92E-01    |
| 197.113.535.156.250 |         | 0.0010400   | 0.0010400   | 0.0010400   | 0.0010400   | -3,14E-01 | 3,71E-02  | 19711  | 0.00098200           | 0.00098200  | 0.00098200  | 0.00098200  | 0.00024800  | 1,61E-01    |
| 197.153.964.843.750 |         | 0.00091400  | 0.00091400  | 0.00091400  | 0.00091400  | -1,95E-01 | -3,34E-02 | 19715  | 0.0034200            | 0.0034200   | 0.0034200   | 0.0034200   | 0.00016100  | -4,79E-01   |
| 197.194.394.531.250 |         | 0.00088400  | 0.00088400  | 0.00088400  | 0.00088400  | -5,84E-01 | -5,02E-02 | 19719  | 0.0022900            | 0.0022900   | 0.0022900   | 0.0022900   | -0.00013900 | -9,95E-02   |
| 197.234.863.281.250 |         | 0.00044200  | 0.00044200  | 0.00044200  | 0.00044200  | -6,01E-01 | 6,39E-02  | 19723  | 0.0022900            | 0.0022900   | 0.0022900   | 0.0022900   | 8,07E-01    | -2,79E-01   |
| 197.275.332.031.250 |         | 0.00039800  | 0.00039800  | 0.00039800  | 0.00039800  | -6,61E-02 | 5,22E-02  | 19728  | 0.0029400            | 0.0029400   | 0.0029400   | 0.0029400   | -0.00036500 | -6,12E-01   |
| 197.315.839.843.750 |         | 0.00038900  | 0.00038900  | 0.00038900  | 0.00038900  | -1,78E-01 | -3,60E-02 | 19732  | -0.00066200          | -0.00066200 | -0.00066200 | -0.00066200 | -0.00041500 | 3,87E-01    |
| 197.356.347.656.250 |         | 0.00025300  | 0.00025300  | 0.00025300  | 0.00025300  | -3,58E-01 | -4,38E-03 | 19736  | -0.00042500          | -0.00042500 | -0.00042500 | -0.00042500 | -5,20E-01   | 7,86E-01    |
| 197.396.875.000.000 |         | 9,90E-01    | 9,90E-01    | 9,90E-01    | 9,90E-01    | -2,14E-01 | 3,05E-02  | 19740  | -0.0010800           | -0.0010800  | -0.0010800  | -0.0010800  | 0.00022200  | 3,23E-01    |
| 197.437.421.875.000 |         | 7,98E-01    | 7,98E-01    | 7,98E-01    | 7,98E-01    | -1,11E-01 | 6,57E-03  | 19744  | 0.0013800            | 0.0013800   | 0.0013800   | 0.0013800   | 0.00021000  | -7,61E-01   |
| 197.477.968.750.000 |         | 9,38E-02    | 9,38E-02    | 9,38E-02    | 9,38E-02    | -1,61E-01 | -2,25E-02 | 19748  | 0.00061800           | 0.00061800  | 0.00061800  | 0.00061800  | -0.00039500 | -4,05E-01   |
| 197.518.554.687.500 |         | -5,05E-01   | -5,05E-01   | -5,05E-01   | -5,05E-01   | -2,93E-01 | -1,82E-02 | 19752  | -0.0018300           | -0.0018300  | -0.0018300  | -0.0018300  | -0.00011900 | 6,64E-01    |
| 197.559.140.625.000 |         | -0.00022900 | -0.00022900 | -0.00022900 | -0.00022900 | -3,08E-01 | 4,04E-02  | 19756  | -0.00034600          | -0.00034600 | -0.00034600 | -0.00034600 | 0.00014400  | -6,81E-02   |
| 197.599.765.625.000 |         | -0.00030100 | -0.00030100 | -0.00030100 | -0.00030100 | 3,51E-02  | 3,43E-02  | 19760  | -0.00066400          | -0.00066400 | -0.00066400 | -0.00066400 | -0.00017400 | -1,38E-01   |
| 197.640.390.625.000 |         | -0.00020000 | -0.00020000 | -0.00020000 | -0.00020000 | -2,94E-02 | -2,69E-02 | 19764  | -0.0017600           | -0.0017600  | -0.0017600  | -0.0017600  | 3,18E-01    | 8,17E-02    |
| 197.681.035.156.250 |         | -0.00032500 | -0.00032500 | -0.00032500 | -0.00032500 | -1,84E-01 | -1,03E-02 | 19768  | -0.00040500          | -0.00040500 | -0.00040500 | -0.00040500 | -0.00010800 | -2,68E-01   |
| 197.721.699.218.750 |         | -0.00034900 | -0.00034900 | -0.00034900 | -0.00034900 | -1,13E-01 | 7,91E-03  | 19772  | -0.0026300           | -0.0026300  | -0.0026300  | -0.0026300  | -0.00018600 | 6,83E-01    |
| 197.762.382.812.500 |         | -0.00041700 | -0.00041700 | -0.00041700 | -0.00041700 | -1,19E-01 | -1,53E-02 | 19776  | -0.0019200           | -0.0019200  | -0.0019200  | -0.0019200  | 0.00044800  | 3,88E-01    |
| 197.802.031.250.000 |         | -0.00044500 | -0.00044500 | -0.00044500 | -0.00044500 | -2,37E-01 | -1,44E-02 | 19780  | 0.00096500           | 0.00096500  | 0.00096500  | 0.00096500  | 0.00012500  | -5,86E-01   |
| 197.842.753.906.250 |         | -0.00060700 | -0.00060700 | -0.00060700 | -0.00060700 | -2,35E-01 | 2,32E-02  | 19784  | -0.00091200          | -0.00091200 | -0.00091200 | -0.00091200 | -2,33E-01   | -1,82E-01   |
| 197.883.476.562.500 |         | -0.00063700 | -0.00063700 | -0.00063700 | -0.00063700 | -4,76E-02 | 2,24E-02  | 19788  | 0.00077500           | 0.00077500  | 0.00077500  | 0.00077500  | -2,26E-01   | -2,80E-02   |
| 197.924.218.750.000 |         | -0.00064600 | -0.00064600 | -0.00064600 | -0.00064600 | -5,29E-02 | -1,04E-02 | 19792  | -0.0011000           | -0.0011000  | -0.0011000  | -0.0011000  | -4,61E-01   | -6,48E-02   |
| 197.964.980.468.750 |         | -0.00068000 | -0.00068000 | -0.00068000 | -0.00068000 | -1,32E-01 | -1,71E-02 | 19796  | 0.00040000           | 0.00040000  | 0.00040000  | 0.00040000  | -7,55E-01   | -3,49E-02   |
| 198.004.726.562.500 |         | -0.00075200 | -0.00075200 | -0.00075200 | -0.00075200 | -1,91E-01 | 7,92E-03  | 19800  | -0.0017000           | -0.0017000  | -0.0017000  | -0.0017000  | -7,42E-01   | 2,56E-02    |
| 198.045.527.343.750 |         | -0.00083300 | -0.00083300 | -0.00083300 | -0.00083300 | -6,85E-02 | 3,11E-02  | 19805  | -0.00019800          | -0.00019800 | -0.00019800 | -0.00019800 | -5,49E-01   | -2,86E-01   |
| 198.086.328.125.000 |         | -0.00080800 | -0.00080800 | -0.00080800 | -0.00080800 | 6,30E-02  | -4,15E-03 | 19809  | -0.0021500           | -0.0021500  | -0.0021500  | -0.0021500  | -0.00030700 | 4,68E-01    |
| 198.127.167.968.750 |         | -0.00078200 | -0.00078200 | -0.00078200 | -0.00078200 | -1,02E-01 | -1,12E-02 | 19813  | -0.0027100           | -0.0027100  | -0.0027100  | -0.0027100  | 0.00032700  | 6,44E-01    |
| 198.166.972.656.250 |         | -0.00089100 | -0.00089100 | -0.00089100 | -0.00089100 | -2,77E-02 | 8,68E-03  | 19817  | 0.00048500           | 0.00048500  | 0.00048500  | 0.00048500  | 0.00021200  | -9,55E-01   |
| 198.207.832.031.250 |         | -0.00080400 | -0.00080400 | -0.00080400 | -0.00080400 | -3,23E-02 | -7,70E-03 | 19821  | -0.0010000           | -0.0010000  | -0.0010000  | -0.0010000  | -0.00044300 | -2,95E-01   |
| 198.248.710.937.500 |         | -0.00091700 | -0.00091700 | -0.00091700 | -0.00091700 | -9,06E-02 | 7,52E-03  | 19825  | -0.0031400           | -0.0031400  | -0.0031400  | -0.0031400  | -2,93E-01   | 8,13E-01    |

|                     |             |             |             |             |            |           |       |             |             |             |             |             |             |
|---------------------|-------------|-------------|-------------|-------------|------------|-----------|-------|-------------|-------------|-------------|-------------|-------------|-------------|
| 198.288.574.218.750 | -0.00087700 | -0.00087700 | -0.00087700 | -0.00087700 | 2,84E-02   | -1,74E-02 | 19829 | -0.0012400  | -0.0012400  | -0.0012400  | -0.0012400  | 0.00021400  | -7,33E-02   |
| 198.329.492.187.500 | -0.00089400 | -0.00089400 | -0.00089400 | -0.00089400 | -2,31E-01  | -6,96E-03 | 19833 | -0.0014100  | -0.0014100  | -0.0014100  | -0.0014100  | -8,85E-01   | -3,64E-01   |
| 198.370.429.687.500 | -0.0010700  | -0.0010700  | -0.0010700  | -0.0010700  | -2,86E-02  | 2,94E-02  | 19837 | -0.0019600  | -0.0019600  | -0.0019600  | -0.0019600  | -8,46E-01   | 2,73E-01    |
| 198.410.312.500.000 | -0.00091700 | -0.00091700 | -0.00091700 | -0.00091700 | 6,47E-03   | -7,32E-03 | 19841 | -0.0020900  | -0.0020900  | -0.0020900  | -0.0020900  | 0.00013200  | 3,71E-02    |
| 198.451.289.062.500 | -0.0010600  | -0.0010600  | -0.0010600  | -0.0010600  | -8,78E-02  | -8,75E-03 | 19845 | -0.00089600 | -0.00089600 | -0.00089600 | -0.00089600 | -5,46E-01   | 1,24E-01    |
| 198.491.230.468.750 | -0.00098900 | -0.00098900 | -0.00098900 | -0.00098900 | -6,43E-02  | -4,94E-03 | 19849 | -0.0025400  | -0.0025400  | -0.0025400  | -0.0025400  | 0.00023200  | -2,07E-01   |
| 198.532.226.562.500 | -0.0011100  | -0.0011100  | -0.0011100  | -0.0011100  | -1,28E-01  | 3,07E-02  | 19853 | 0.00098200  | 0.00098200  | 0.00098200  | 0.00098200  | -0.00022200 | -9,19E-01   |
| 198.572.187.500.000 | -0.0010900  | -0.0010900  | -0.0010900  | -0.0010900  | 1,84E-01   | 2,89E-02  | 19857 | -0.0043300  | -0.0043300  | -0.0043300  | -0.0043300  | -0.00051200 | 6,61E-01    |
| 198.613.222.656.250 | -0.00096400 | -0.00096400 | -0.00096400 | -0.00096400 | 1,06E-01   | -3,89E-02 | 19861 | -0.0031600  | -0.0031600  | -0.0031600  | -0.0031600  | 0.00031300  | 9,87E-01    |
| 198.654.277.343.750 | -0.0010000  | -0.0010000  | -0.0010000  | -0.0010000  | -1,35E-01  | -1,02E-02 | 19865 | -0.0017600  | -0.0017600  | -0.0017600  | -0.0017600  | 0.00029800  | -2,75E-01   |
| 198.694.296.875.000 | -0.0010700  | -0.0010700  | -0.0010700  | -0.0010700  | 2,35E-02   | 1,09E-02  | 19869 | -0.00074200 | -0.00074200 | -0.00074200 | -0.00074200 | 9,01E-01    | -7,19E-01   |
| 198.735.390.625.000 | -0.00098600 | -0.00098600 | -0.00098600 | -0.00098600 | -4,63E-02  | 1,30E-03  | 19874 | -0.0010300  | -0.0010300  | -0.0010300  | -0.0010300  | -0.00028500 | 4,34E-01    |
| 198.775.429.687.500 | -0.0011100  | -0.0011100  | -0.0011100  | -0.0011100  | 3,41E-02   | 2,78E-02  | 19878 | -0.0030500  | -0.0030500  | -0.0030500  | -0.0030500  | 0.00044200  | -7,90E-02   |
| 198.815.488.281.250 | -0.00095800 | -0.00095800 | -0.00095800 | -0.00095800 | 1,76E-01   | 1,37E-02  | 19882 | 0.0025100   | 0.0025100   | 0.0025100   | 0.0025100   | -0.00034800 | -0.00011700 |
| 198.856.640.625.000 | -0.00096800 | -0.00096800 | -0.00096800 | -0.00096800 | 1,45E-01   | -4,77E-03 | 19886 | -0.0058800  | -0.0058800  | -0.0058800  | -0.0058800  | -0.00051000 | 0.00012700  |
| 198.896.738.281.250 | -0.00084000 | -0.00084000 | -0.00084000 | -0.00084000 | 1,38E-01   | 1,06E-02  | 19890 | -0.0016300  | -0.0016300  | -0.0016300  | -0.0016300  | 0.00068400  | 0.00012100  |
| 198.937.910.156.250 | -0.00085600 | -0.00085600 | -0.00085600 | -0.00085600 | 2,31E-01   | 2,82E-02  | 19894 | -0.00032100 | -0.00032100 | -0.00032100 | -0.00032100 | 0.00047500  | -9,79E-01   |
| 198.978.046.875.000 | -0.00065300 | -0.00065300 | -0.00065300 | -0.00065300 | 3,67E-01   | -3,60E-03 | 19898 | 0.0022400   | 0.0022400   | 0.0022400   | 0.0022400   | -0.00011200 | -8,06E-01   |
| 199.018.183.593.750 | -0.00056200 | -0.00056200 | -0.00056200 | -0.00056200 | 2,02E-01   | 1,56E-02  | 19902 | -0.0012200  | -0.0012200  | -0.0012200  | -0.0012200  | -0.00017200 | 3,22E-01    |
| 199.059.414.062.500 | -0.00048800 | -0.00048800 | -0.00048800 | -0.00048800 | 4,93E-01   | 6,37E-02  | 19906 | 0.00083900  | 0.00083900  | 0.00083900  | 0.00083900  | 0.00015000  | 2,28E-02    |
| 199.099.589.843.750 | -0.00016000 | -0.00016000 | -0.00016000 | -0.00016000 | 7,20E-01   | 1,80E-02  | 19910 | 9,00E-03    | 9,00E-03    | 9,00E-03    | 9,00E-03    | -0.00015300 | -1,27E-01   |
| 199.139.785.156.250 | 9,07E-01    | 9,07E-01    | 9,07E-01    | 9,07E-01    | 6,38E-01   | -1,62E-02 | 19914 | -0.00039200 | -0.00039200 | -0.00039200 | -0.00039200 | 4,78E-01    | 1,61E-01    |
| 199.181.054.687.500 | 0.00036000  | 0.00036000  | 0.00036000  | 0.00036000  | 5,89E-01   | 7,33E-03  | 19918 | 0.00039000  | 0.00039000  | 0.00039000  | 0.00039000  | -2,24E-01   | -4,97E-01   |
| 199.221.289.062.500 | 0.00057000  | 0.00057000  | 0.00057000  | 0.00057000  | 6,98E-01   | 1,76E-02  | 19922 | -0.00057500 | -0.00057500 | -0.00057500 | -0.00057500 | -0.00035800 | 5,21E-01    |
| 199.261.542.968.750 | 0.00092200  | 0.00092200  | 0.00092200  | 0.00092200  | 7,31E-01   | 9,38E-03  | 19926 | -0.0024900  | -0.0024900  | -0.0024900  | -0.0024900  | 0.00039700  | 0.00011200  |
| 199.302.871.093.750 | 0.0011700   | 0.0011700   | 0.0011700   | 0.0011700   | 7,74E-01   | 4,87E-02  | 19930 | 0.0026600   | 0.0026600   | 0.0026600   | 0.0026600   | 0.00055800  | -1,98E-01   |
| 199.343.144.531.250 | 0.0015500   | 0.0015500   | 0.0015500   | 0.0015500   | 0.00011300 | 6,72E-02  | 19934 | 0.0020700   | 0.0020700   | 0.0020700   | 0.0020700   | 0.00023500  | -8,59E-02   |
| 199.383.457.031.250 | 0.0020800   | 0.0020800   | 0.0020800   | 0.0020800   | 0.00013200 | 4,93E-02  | 19938 | 0.0045600   | 0.0045600   | 0.0045600   | 0.0045600   | 0.00048900  | -3,61E-01   |
| 199.423.769.531.250 | 0.0026100   | 0.0026100   | 0.0026100   | 0.0026100   | 0.00015300 | 6,95E-02  | 19942 | 0.0060100   | 0.0060100   | 0.0060100   | 0.0060100   | -5,58E-01   | -3,91E-01   |
| 199.464.101.562.500 | 0.0033100   | 0.0033100   | 0.0033100   | 0.0033100   | 0.00018800 | 7,65E-02  | 19946 | 0.0041100   | 0.0041100   | 0.0041100   | 0.0041100   | 0.00017400  | 4,70E-01    |
| 199.505.507.812.500 | 0.0041500   | 0.0041500   | 0.0041500   | 0.0041500   | 0.00021500 | 4,53E-02  | 19951 | 0.0074300   | 0.0074300   | 0.0074300   | 0.0074300   | 0.00032800  | -2,94E-01   |
| 199.545.878.906.250 | 0.0050600   | 0.0050600   | 0.0050600   | 0.0050600   | 0.00022500 | 1,08E-01  | 19955 | 0.0067900   | 0.0067900   | 0.0067900   | 0.0067900   | -6,61E-01   | -4,50E-01   |
| 199.586.250.000.000 | 0.0059600   | 0.0059600   | 0.0059600   | 0.0059600   | 0.00030200 | 2,08E-01  | 19959 | 0.0069000   | 0.0069000   | 0.0069000   | 0.0069000   | -3,48E-01   | 9,16E-01    |
| 199.626.640.625.000 | 0.0075000   | 0.0075000   | 0.0075000   | 0.0075000   | 0.00039300 | 2,31E-01  | 19963 | 0.0065100   | 0.0065100   | 0.0065100   | 0.0065100   | 0.00067300  | 0.00010900  |
| 199.667.070.312.500 | 0.0091400   | 0.0091400   | 0.0091400   | 0.0091400   | 0.00048900 | 3,52E-01  | 19967 | 0.012300    | 0.012300    | 0.012300    | 0.012300    | 0.00084300  | -5,03E-01   |

|                     |          |          |          |          |            |             |       |          |          |          |          |             |             |
|---------------------|----------|----------|----------|----------|------------|-------------|-------|----------|----------|----------|----------|-------------|-------------|
| 199.707.500.000.000 | 0.011500 | 0.011500 | 0.011500 | 0.011500 | 0.00067800 | 5,08E-01    | 19971 | 0.013300 | 0.013300 | 0.013300 | 0.013300 | 0.00026700  | -2,68E-01   |
| 199.747.949.218.750 | 0.014600 | 0.014600 | 0.014600 | 0.014600 | 0.00090000 | 7,76E-01    | 19975 | 0.014500 | 0.014500 | 0.014500 | 0.014500 | 0.00062600  | 0.00010600  |
| 199.788.398.437.500 | 0.018700 | 0.018700 | 0.018700 | 0.018700 | 0.0013100  | 0.00013800  | 19979 | 0.018400 | 0.018400 | 0.018400 | 0.018400 | 0.0011200   | 0.00013600  |
| 199.829.960.937.500 | 0.025300 | 0.025300 | 0.025300 | 0.025300 | 0.0020300  | 0.00015000  | 19983 | 0.023700 | 0.023700 | 0.023700 | 0.023700 | 0.0017400   | 7,43E-01    |
| 199.870.449.218.750 | 0.035400 | 0.035400 | 0.035400 | 0.035400 | 0.0025400  | 0.00031000  | 19987 | 0.032700 | 0.032700 | 0.032700 | 0.032700 | 0.0017300   | -9,60E-01   |
| 199.872.578.125.000 | 0.036100 | 0.036100 | 0.036100 | 0.036100 | 0.0033500  | 0.0011300   | 19987 | 0.031100 | 0.031100 | 0.031100 | 0.031100 | 0.0013300   | 0.0057600   |
| 199.875.781.250.000 | 0.037200 | 0.037200 | 0.037200 | 0.037200 | 0.0031400  | 0.00046000  | 19988 | 0.033400 | 0.033400 | 0.033400 | 0.033400 | 0.0048000   | -0.00092900 |
| 199.878.984.375.000 | 0.038200 | 0.038200 | 0.038200 | 0.038200 | 0.0036500  | 0.0018300   | 19988 | 0.034100 | 0.034100 | 0.034100 | 0.034100 | 0.00073600  | -0.00080700 |
| 199.882.167.968.750 | 0.039500 | 0.039500 | 0.039500 | 0.039500 | 0.0043100  | 0.00087800  | 19988 | 0.033800 | 0.033800 | 0.033800 | 0.033800 | 0.0042900   | 0.0013500   |
| 199.885.371.093.750 | 0.040900 | 0.040900 | 0.040900 | 0.040900 | 0.0042100  | -0.00018100 | 19989 | 0.036900 | 0.036900 | 0.036900 | 0.036900 | 0.0016000   | 0.0037600   |
| 199.888.574.218.750 | 0.042200 | 0.042200 | 0.042200 | 0.042200 | 0.0042000  | 3,52E-01    | 19989 | 0.034900 | 0.034900 | 0.034900 | 0.034900 | 0.0066900   | 0.0051200   |
| 199.890.703.125.000 | 0.043100 | 0.043100 | 0.043100 | 0.043100 | 0.0042300  | 0.00057200  | 19989 | 0.040400 | 0.040400 | 0.040400 | 0.040400 | 0.0043300   | -0.011800   |
| 199.893.906.250.000 | 0.044500 | 0.044500 | 0.044500 | 0.044500 | 0.0045000  | 0.0011100   | 19989 | 0.037200 | 0.037200 | 0.037200 | 0.037200 | 0.00041200  | 0.0083300   |
| 199.897.109.375.000 | 0.046000 | 0.046000 | 0.046000 | 0.046000 | 0.0049400  | 0.0014000   | 19990 | 0.040700 | 0.040700 | 0.040700 | 0.040700 | 0.0096700   | 0.0032500   |
| 199.900.292.968.750 | 0.047600 | 0.047600 | 0.047600 | 0.047600 | 0.0054000  | 0.0016600   | 19990 | 0.043300 | 0.043300 | 0.043300 | 0.043300 | 0.0024900   | -0.014200   |
| 199.903.496.093.750 | 0.049500 | 0.049500 | 0.049500 | 0.049500 | 0.0060000  | 0.0010700   | 19990 | 0.042300 | 0.042300 | 0.042300 | 0.042300 | 0.00057500  | 0.0062500   |
| 199.906.699.218.750 | 0.051500 | 0.051500 | 0.051500 | 0.051500 | 0.0060800  | 0.00098400  | 19991 | 0.043700 | 0.043700 | 0.043700 | 0.043700 | 0.0064900   | -0.0020500  |
| 199.908.828.125.000 | 0.052700 | 0.052700 | 0.052700 | 0.052700 | 0.0065200  | 0.0020100   | 19991 | 0.045800 | 0.045800 | 0.045800 | 0.045800 | -0.00051900 | -0.012800   |
| 199.912.031.250.000 | 0.055000 | 0.055000 | 0.055000 | 0.055000 | 0.0071500  | 0.0014500   | 19991 | 0.043400 | 0.043400 | 0.043400 | 0.043400 | -0.00031600 | 0.016400    |
| 199.915.234.375.000 | 0.057300 | 0.057300 | 0.057300 | 0.057300 | 0.0074500  | 0.0015700   | 19992 | 0.045600 | 0.045600 | 0.045600 | 0.045600 | 0.0099600   | 0.0094600   |
| 199.918.437.500.000 | 0.059700 | 0.059700 | 0.059700 | 0.059700 | 0.0081600  | 0.0024100   | 19992 | 0.049800 | 0.049800 | 0.049800 | 0.049800 | 0.0057500   | -0.015000   |
| 199.921.621.093.750 | 0.062500 | 0.062500 | 0.062500 | 0.062500 | 0.0089900  | 0.0026400   | 19992 | 0.049200 | 0.049200 | 0.049200 | 0.049200 | 0.00038800  | 0.0075500   |
| 199.924.824.218.750 | 0.065500 | 0.065500 | 0.065500 | 0.065500 | 0.0098500  | 0.0030300   | 19992 | 0.050100 | 0.050100 | 0.050100 | 0.050100 | 0.010600    | 0.016300    |
| 199.926.953.125.000 | 0.067800 | 0.067800 | 0.067800 | 0.067800 | 0.010600   | 0.0029900   | 19993 | 0.054900 | 0.054900 | 0.054900 | 0.054900 | 0.0090900   | -0.010500   |
| 199.930.156.250.000 | 0.071100 | 0.071100 | 0.071100 | 0.071100 | 0.011400   | 0.0034800   | 19993 | 0.054900 | 0.054900 | 0.054900 | 0.054900 | 0.0049900   | -0.0032800  |
| 199.933.359.375.000 | 0.075100 | 0.075100 | 0.075100 | 0.075100 | 0.012800   | 0.0042400   | 19993 | 0.058100 | 0.058100 | 0.058100 | 0.058100 | 0.0069800   | 0.0016500   |
| 199.936.562.500.000 | 0.079300 | 0.079300 | 0.079300 | 0.079300 | 0.014200   | 0.0040100   | 19994 | 0.059400 | 0.059400 | 0.059400 | 0.059400 | 0.0060400   | 0.0052200   |
| 199.939.765.625.000 | 0.084200 | 0.084200 | 0.084200 | 0.084200 | 0.015400   | 0.0042600   | 19994 | 0.061900 | 0.061900 | 0.061900 | 0.061900 | 0.010300    | 0.0046300   |
| 199.942.968.750.000 | 0.089200 | 0.089200 | 0.089200 | 0.089200 | 0.016900   | 0.0070400   | 19994 | 0.066000 | 0.066000 | 0.066000 | 0.066000 | 0.0090100   | 0.0017100   |
| 199.945.097.656.250 | 0.093200 | 0.093200 | 0.093200 | 0.093200 | 0.019200   | 0.0064900   | 19995 | 0.066700 | 0.066700 | 0.066700 | 0.066700 | 0.011200    | 0.0036000   |
| 199.948.300.781.250 | 0.099400 | 0.099400 | 0.099400 | 0.099400 | 0.020300   | 0.0058400   | 19995 | 0.072000 | 0.072000 | 0.072000 | 0.072000 | 0.010900    | -0.0014700  |
| 199.951.503.906.250 | 0.10620  | 0.10620  | 0.10620  | 0.10620  | 0.022900   | 0.0080000   | 19995 | 0.073700 | 0.073700 | 0.073700 | 0.073700 | 0.010300    | 0.0059500   |
| 199.954.687.500.000 | 0.11405  | 0.11405  | 0.11405  | 0.11405  | 0.025500   | 0.0065400   | 19995 | 0.078600 | 0.078600 | 0.078600 | 0.078600 | 0.014700    | 0.0097800   |
| 199.957.890.625.000 | 0.12247  | 0.12247  | 0.12247  | 0.12247  | 0.027100   | 0.0061500   | 19996 | 0.083200 | 0.083200 | 0.083200 | 0.083200 | 0.016600    | 0.0015600   |
| 199.961.093.750.000 | 0.13138  | 0.13138  | 0.13138  | 0.13138  | 0.029400   | 0.0096000   | 19996 | 0.089200 | 0.089200 | 0.089200 | 0.089200 | 0.015700    | 0.0036000   |

|                     |         |         |         |         |          |             |       |          |          |          |          |           |             |
|---------------------|---------|---------|---------|---------|----------|-------------|-------|----------|----------|----------|----------|-----------|-------------|
| 199.963.222.656.250 | 0.13814 | 0.13814 | 0.13814 | 0.13814 | 0.032200 | 0.0075700   | 19996 | 0.091500 | 0.091500 | 0.091500 | 0.091500 | 0.018500  | 0.0044000   |
| 199.966.425.781.250 | 0.14857 | 0.14857 | 0.14857 | 0.14857 | 0.033400 | 0.0062400   | 19997 | 0.099000 | 0.099000 | 0.099000 | 0.099000 | 0.018100  | 0.0026400   |
| 199.969.628.906.250 | 0.15958 | 0.15958 | 0.15958 | 0.15958 | 0.036200 | 0.0082200   | 19997 | 0.10313  | 0.10313  | 0.10313  | 0.10313  | 0.020200  | 0.013700    |
| 199.972.832.031.250 | 0.17173 | 0.17173 | 0.17173 | 0.17173 | 0.038700 | 0.0067600   | 19997 | 0.11195  | 0.11195  | 0.11195  | 0.11195  | 0.026900  | 0.016000    |
| 199.976.035.156.250 | 0.18439 | 0.18439 | 0.18439 | 0.18439 | 0.040500 | 0.0055600   | 19998 | 0.12036  | 0.12036  | 0.12036  | 0.12036  | 0.030400  | 0.0021200   |
| 199.979.238.281.250 | 0.19770 | 0.19770 | 0.19770 | 0.19770 | 0.042300 | 0.0040000   | 19998 | 0.13145  | 0.13145  | 0.13145  | 0.13145  | 0.028200  | -0.011100   |
| 199.981.367.187.500 | 0.20692 | 0.20692 | 0.20692 | 0.20692 | 0.042600 | 0.0030700   | 19998 | 0.13541  | 0.13541  | 0.13541  | 0.13541  | 0.024500  | 0.0061100   |
| 199.984.570.312.500 | 0.22043 | 0.22043 | 0.22043 | 0.22043 | 0.043900 | 0.0049000   | 19998 | 0.14451  | 0.14451  | 0.14451  | 0.14451  | 0.031500  | 0.029700    |
| 199.987.773.437.500 | 0.23502 | 0.23502 | 0.23502 | 0.23502 | 0.045800 | 0.0029900   | 19999 | 0.15557  | 0.15557  | 0.15557  | 0.15557  | 0.043500  | 0.023800    |
| 199.990.976.562.500 | 0.24977 | 0.24977 | 0.24977 | 0.24977 | 0.045800 | 0.0029200   | 19999 | 0.17238  | 0.17238  | 0.17238  | 0.17238  | 0.046700  | -0.0036600  |
| 199.994.179.687.500 | 0.26439 | 0.26439 | 0.26439 | 0.26439 | 0.047700 | 0.0013900   | 19999 | 0.18553  | 0.18553  | 0.18553  | 0.18553  | 0.041100  | -0.0068000  |
| 199.996.308.593.750 | 0.27518 | 0.27518 | 0.27518 | 0.27518 | 0.046600 | -0.0065900  | 20000 | 0.19431  | 0.19431  | 0.19431  | 0.19431  | 0.043100  | 0.012200    |
| 199.999.511.718.750 | 0.28921 | 0.28921 | 0.28921 | 0.28921 | 0.044100 | -0.0021400  | 20000 | 0.20851  | 0.20851  | 0.20851  | 0.20851  | 0.047600  | 0.016800    |
| 200.002.714.843.750 | 0.30343 | 0.30343 | 0.30343 | 0.30343 | 0.045200 | 0.0028900   | 20000 | 0.22479  | 0.22479  | 0.22479  | 0.22479  | 0.053900  | 0.017600    |
| 200.005.917.968.750 | 0.31818 | 0.31818 | 0.31818 | 0.31818 | 0.046000 | -0.00018700 | 20001 | 0.24305  | 0.24305  | 0.24305  | 0.24305  | 0.058900  | 0.0018300   |
| 200.009.121.093.750 | 0.33291 | 0.33291 | 0.33291 | 0.33291 | 0.045100 | -0.00046300 | 20001 | 0.26257  | 0.26257  | 0.26257  | 0.26257  | 0.055100  | 0.0026100   |
| 200.012.324.218.750 | 0.34703 | 0.34703 | 0.34703 | 0.34703 | 0.045700 | 0.0028700   | 20001 | 0.27828  | 0.27828  | 0.27828  | 0.27828  | 0.060600  | 0.019800    |
| 200.014.453.125.000 | 0.35727 | 0.35727 | 0.35727 | 0.35727 | 0.046600 | -0.0017900  | 20001 | 0.29487  | 0.29487  | 0.29487  | 0.29487  | 0.065600  | -0.018600   |
| 200.017.656.250.000 | 0.37191 | 0.37191 | 0.37191 | 0.37191 | 0.044700 | -0.0034300  | 20002 | 0.31332  | 0.31332  | 0.31332  | 0.31332  | 0.050700  | -0.022100   |
| 200.020.859.375.000 | 0.38595 | 0.38595 | 0.38595 | 0.38595 | 0.044400 | -0.00020300 | 20002 | 0.32734  | 0.32734  | 0.32734  | 0.32734  | 0.051400  | 0.0073300   |
| 200.024.062.500.000 | 0.40033 | 0.40033 | 0.40033 | 0.40033 | 0.044600 | 0.0013900   | 20002 | 0.34625  | 0.34625  | 0.34625  | 0.34625  | 0.055400  | -0.0081900  |
| 200.027.265.625.000 | 0.41455 | 0.41455 | 0.41455 | 0.41455 | 0.045300 | 0.0024000   | 20003 | 0.36282  | 0.36282  | 0.36282  | 0.36282  | 0.046200  | -0.016600   |
| 200.030.468.750.000 | 0.42937 | 0.42937 | 0.42937 | 0.42937 | 0.046100 | -0.00085000 | 20003 | 0.37586  | 0.37586  | 0.37586  | 0.37586  | 0.044700  | -0.016700   |
| 200.032.617.187.500 | 0.43924 | 0.43924 | 0.43924 | 0.43924 | 0.044800 | -0.0026500  | 20003 | 0.38676  | 0.38676  | 0.38676  | 0.38676  | 0.037300  | -0.023300   |
| 200.035.820.312.500 | 0.45336 | 0.45336 | 0.45336 | 0.45336 | 0.044700 | -0.00046600 | 20004 | 0.39579  | 0.39579  | 0.39579  | 0.39579  | 0.032300  | -0.013500   |
| 200.039.023.437.500 | 0.46786 | 0.46786 | 0.46786 | 0.46786 | 0.044500 | -0.0025800  | 20004 | 0.40740  | 0.40740  | 0.40740  | 0.40740  | 0.028600  | -0.012600   |
| 200.042.226.562.500 | 0.48191 | 0.48191 | 0.48191 | 0.48191 | 0.043100 | -0.0017900  | 20004 | 0.41415  | 0.41415  | 0.41415  | 0.41415  | 0.024200  | -0.016900   |
| 200.045.429.687.500 | 0.49548 | 0.49548 | 0.49548 | 0.49548 | 0.043400 | 0.0027900   | 20005 | 0.42289  | 0.42289  | 0.42289  | 0.42289  | 0.017800  | -0.025900   |
| 200.048.632.812.500 | 0.50969 | 0.50969 | 0.50969 | 0.50969 | 0.044900 | 7,03E-01    | 20005 | 0.42555  | 0.42555  | 0.42555  | 0.42555  | 0.0075700 | -0.015100   |
| 200.050.761.718.750 | 0.51939 | 0.51939 | 0.51939 | 0.51939 | 0.043400 | -0.0019400  | 20005 | 0.42693  | 0.42693  | 0.42693  | 0.42693  | 0.0097600 | -0.0023100  |
| 200.053.964.843.750 | 0.53284 | 0.53284 | 0.53284 | 0.53284 | 0.043800 | 0.0038900   | 20005 | 0.43076  | 0.43076  | 0.43076  | 0.43076  | 0.0063400 | -0.0047600  |
| 200.057.167.968.750 | 0.54748 | 0.54748 | 0.54748 | 0.54748 | 0.045900 | 0.0025600   | 20006 | 0.43099  | 0.43099  | 0.43099  | 0.43099  | 0.0067100 | 0.0060600   |
| 200.060.371.093.750 | 0.56228 | 0.56228 | 0.56228 | 0.56228 | 0.045500 | -0.00038300 | 20006 | 0.43506  | 0.43506  | 0.43506  | 0.43506  | 0.010200  | -0.00023800 |
| 200.063.574.218.750 | 0.57659 | 0.57659 | 0.57659 | 0.57659 | 0.045700 | 0.0041800   | 20006 | 0.43753  | 0.43753  | 0.43753  | 0.43753  | 0.0065600 | -0.0059900  |
| 200.066.777.343.750 | 0.59157 | 0.59157 | 0.59157 | 0.59157 | 0.048100 | 0.0039200   | 20007 | 0.43926  | 0.43926  | 0.43926  | 0.43926  | 0.0063800 | -0.00057700 |

|                     |         |         |         |         |            |             |       |         |           |         |           |           |             |
|---------------------|---------|---------|---------|---------|------------|-------------|-------|---------|-----------|---------|-----------|-----------|-------------|
| 200.068.925.781.250 | 0.60239 | 0.60239 | 0.60239 | 0.60239 | 0.047800   | 0.00075000  | 20007 | 0.44095 | 0.44095   | 0.44095 | 0.44095   | 0.0062500 | 0.010100    |
| 200.072.128.906.250 | 0.61713 | 0.61713 | 0.61713 | 0.61713 | 0.048600   | 0.0063400   | 20007 | 0.44260 | 0.44260   | 0.44260 | 0.44260   | 0.011800  | 0.0100000   |
| 200.075.332.031.250 | 0.63347 | 0.63347 | 0.63347 | 0.63347 | 0.051800   | 0.0090300   | 20008 | 0.44852 | 0.44852   | 0.44852 | 0.44852   | 0.012700  | -0.00019200 |
| 200.078.535.156.250 | 0.65037 | 0.65037 | 0.65037 | 0.65037 | 0.054300   | 0.0064200   | 20008 | 0.45072 | 0.45072   | 0.45072 | 0.45072   | 0.011700  | 0.0028000   |
| 200.081.738.281.250 | 0.66830 | 0.66830 | 0.66830 | 0.66830 | 0.056000   | 0.0042400   | 20008 | 0.45601 | 0.45601   | 0.45601 | 0.45601   | 0.014500  | 0.0026000   |
| 200.084.941.406.250 | 0.68618 | 0.68618 | 0.68618 | 0.68618 | 0.057100   | 0.0048500   | 20008 | 0.45998 | 0.45998   | 0.45998 | 0.45998   | 0.013400  | 0.0048100   |
| 200.087.070.312.500 | 0.69871 | 0.69871 | 0.69871 | 0.69871 | 0.058500   | 0.0034500   | 20009 | 0.46313 | 0.46313   | 0.46313 | 0.46313   | 0.017000  | 0.019700    |
| 200.090.273.437.500 | 0.71739 | 0.71739 | 0.71739 | 0.71739 | 0.058900   | 0.0022700   | 20009 | 0.46905 | 0.46905   | 0.46905 | 0.46905   | 0.023800  | 0.010600    |
| 200.093.496.093.750 | 0.73657 | 0.73657 | 0.73657 | 0.73657 | 0.060000   | 0.0064700   | 20009 | 0.47846 | 0.47846   | 0.47846 | 0.47846   | 0.023800  | 0.011400    |
| 200.096.699.218.750 | 0.75597 | 0.75597 | 0.75597 | 0.75597 | 0.063000   | 0.0094800   | 20010 | 0.48438 | 0.48438   | 0.48438 | 0.48438   | 0.031100  | 0.013000    |
| 200.099.902.343.750 | 0.77692 | 0.77692 | 0.77692 | 0.77692 | 0.066100   | -0.00063800 | 20010 | 0.49839 | 0.49839   | 0.49839 | 0.49839   | 0.032100  | -0.027000   |
| 200.102.031.250.000 | 0.79118 | 0.72511 | 0.79123 | 0.72516 | 0.062700   | -0.0081000  | 20010 | 0.50152 | -14.315   | 0.50152 | -14.315   | 0.016800  | 0.0056500   |
| 200.105.234.375.000 | 0.81035 | 0.74118 | 0.81046 | 0.74129 | 0.061800   | -0.00055800 | 20011 | 0.50733 | -12.320   | 0.50735 | -12.320   | 0.035200  | 0.042900    |
| 200.108.437.500.000 | 0.83077 | 0.75674 | 0.83095 | 0.75692 | 0.062400   | -0.0024500  | 20011 | 0.52406 | -10.425   | 0.52409 | -10.425   | 0.044300  | -0.0054300  |
| 200.111.660.156.250 | 0.85044 | 0.77180 | 0.85070 | 0.77206 | 0.060200   | -0.0052900  | 20011 | 0.53579 | -0.86270  | 0.53583 | -0.86266  | 0.031700  | -0.0090100  |
| 200.114.863.281.250 | 0.86940 | 0.78624 | 0.86973 | 0.78657 | 0.059000   | -0.00029300 | 20011 | 0.54439 | -0.69399  | 0.54444 | -0.69393  | 0.038500  | 0.030300    |
| 200.118.066.406.250 | 0.88823 | 0.80019 | 0.88863 | 0.80059 | 0.060000   | -0.0058400  | 20012 | 0.56044 | -0.53445  | 0.56051 | -0.53438  | 0.051100  | 0.013500    |
| 200.120.195.312.500 | 0.90143 | 0.80917 | 0.90188 | 0.80962 | 0.055800   | -0.017500   | 20012 | 0.57167 | -0.43381  | 0.57174 | -0.43373  | 0.045600  | -0.0092600  |
| 200.123.398.437.500 | 0.91799 | 0.82224 | 0.91851 | 0.82275 | 0.050600   | -0.012800   | 20012 | 0.58477 | -0.29023  | 0.58486 | -0.29015  | 0.046200  | 0.00096800  |
| 200.126.621.093.750 | 0.93395 | 0.83488 | 0.93454 | 0.83547 | 0.047600   | -0.010200   | 20013 | 0.60130 | -0.15474  | 0.60140 | -0.15464  | 0.046300  | -0.0075200  |
| 200.129.824.218.750 | 0.94855 | 0.84696 | 0.94921 | 0.84762 | 0.044100   | -0.012000   | 20013 | 0.61447 | -0.028700 | 0.61458 | -0.028600 | 0.041300  | 0.0020100   |
| 200.133.027.343.750 | 0.96221 | 0.85860 | 0.96294 | 0.85933 | 0.039900   | -0.012200   | 20013 | 0.62779 | 0.089300  | 0.62791 | 0.089400  | 0.047600  | 0.019100    |
| 200.136.230.468.750 | 0.97414 | 0.86973 | 0.97494 | 0.87053 | 0.036200   | -0.015000   | 20014 | 0.64496 | 0.19891   | 0.64509 | 0.19904   | 0.053600  | 0.00046500  |
| 200.138.359.375.000 | 0.98153 | 0.87689 | 0.98238 | 0.87774 | 0.031900   | -0.015600   | 20014 | 0.65634 | 0.26754   | 0.65647 | 0.26768   | 0.047800  | -0.0100000  |
| 200.141.582.031.250 | 0.99121 | 0.88732 | 0.99213 | 0.88824 | 0.027900   | -0.013500   | 20014 | 0.67054 | 0.36496   | 0.67068 | 0.36510   | 0.048200  | 0.013200    |
| 200.144.785.156.250 | 0.99946 | 0.89728 | 10.005  | 0.89827 | 0.023200   | -0.015000   | 20014 | 0.68733 | 0.45472   | 0.68749 | 0.45487   | 0.056300  | 0.0067400   |
| 200.147.988.281.250 | 10.061  | 0.90677 | 10.072  | 0.90783 | 0.018300   | -0.015200   | 20015 | 0.70662 | 0.53718   | 0.70679 | 0.53735   | 0.052500  | -0.016500   |
| 200.151.191.406.250 | 10.112  | 0.91584 | 10.123  | 0.91697 | 0.013500   | -0.013500   | 20015 | 0.72094 | 0.61292   | 0.72112 | 0.61310   | 0.045800  | -0.014300   |
| 200.154.394.531.250 | 10.147  | 0.92449 | 10.159  | 0.92570 | 0.0096700  | -0.015900   | 20015 | 0.73590 | 0.68221   | 0.73609 | 0.68240   | 0.043400  | 0.0051200   |
| 200.156.542.968.750 | 10.163  | 0.93008 | 10.176  | 0.93133 | 0.0049800  | -0.015600   | 20016 | 0.74415 | 0.72529   | 0.74435 | 0.72549   | 0.048500  | 0.014900    |
| 200.159.746.093.750 | 10.174  | 0.93808 | 10.187  | 0.93940 | 0.0013000  | -0.011500   | 20016 | 0.76190 | 0.78463   | 0.76211 | 0.78484   | 0.051400  | -0.0094600  |
| 200.162.949.218.750 | 10.172  | 0.94567 | 10.186  | 0.94706 | -0.0024000 | -0.011800   | 20016 | 0.77707 | 0.83809   | 0.77729 | 0.83830   | 0.042400  | -0.0028200  |
| 200.166.171.875.000 | 10.159  | 0.95292 | 10.173  | 0.95439 | -0.0062900 | -0.011100   | 20017 | 0.78914 | 0.88643   | 0.78937 | 0.88665   | 0.049500  | 0.016200    |
| 200.169.375.000.000 | 10.131  | 0.95978 | 10.147  | 0.96131 | -0.0095600 | -0.0095500  | 20017 | 0.80892 | 0.92946   | 0.80916 | 0.92970   | 0.052800  | -0.013100   |
| 200.171.503.906.250 | 10.108  | 0.96411 | 10.124  | 0.96569 | -0.011400  | -0.0059300  | 20017 | 0.81730 | 0.95519   | 0.81754 | 0.95544   | 0.042600  | -0.014300   |

|                     |         |         |         |         |            |             |       |         |         |         |         |           |            |
|---------------------|---------|---------|---------|---------|------------|-------------|-------|---------|---------|---------|---------|-----------|------------|
| 200.174.707.031.250 | 10.071  | 0.97036 | 10.087  | 0.97201 | -0.012700  | -0.0046400  | 20017 | 0.83162 | 0.99031 | 0.83188 | 0.99056 | 0.045200  | -0.0021400 |
| 200.177.929.687.500 | 10.026  | 0.97629 | 10.043  | 0.97801 | -0.014400  | -0.0037300  | 20018 | 0.84637 | 10.211  | 0.84664 | 10.214  | 0.041200  | -0.010600  |
| 200.181.132.812.500 | 0.99785 | 0.98184 | 0.99964 | 0.98363 | -0.015100  | -0.0011200  | 20018 | 0.85807 | 10.477  | 0.85835 | 10.479  | 0.038400  | 0.00036300 |
| 200.184.335.937.500 | 0.99290 | 0.98708 | 0.99477 | 0.98894 | -0.015100  | 0.00037800  | 20018 | 0.87097 | 10.705  | 0.87126 | 10.707  | 0.041400  | 0.0013000  |
| 200.187.539.062.500 | 0.98818 | 0.99198 | 0.99012 | 0.99392 | -0.014900  | 0.0026500   | 20019 | 0.88463 | 10.897  | 0.88493 | 10.900  | 0.039200  | -0.013200  |
| 200.189.687.500.000 | 0.98495 | 0.99511 | 0.98693 | 0.99709 | -0.013700  | 0.0049500   | 20019 | 0.89195 | 11.008  | 0.89225 | 11.011  | 0.034400  | -0.0078000 |
| 200.192.890.625.000 | 0.98087 | 0.99950 | 0.98293 | 10.016  | -0.012200  | 0.0046000   | 20019 | 0.90303 | 11.147  | 0.90335 | 11.150  | 0.035000  | -0.0073900 |
| 200.196.113.281.250 | 0.97710 | 10.036  | 0.97922 | 10.058  | -0.010700  | 0.0043100   | 20020 | 0.91445 | 11.260  | 0.91477 | 11.263  | 0.029700  | -0.011700  |
| 200.199.316.406.250 | 0.97399 | 10.075  | 0.97618 | 10.096  | -0.0094500 | 0.0035900   | 20020 | 0.92210 | 11.348  | 0.92243 | 11.351  | 0.027500  | 0.014500   |
| 200.202.519.531.250 | 0.97104 | 10.110  | 0.97330 | 10.133  | -0.0084100 | 0.0043400   | 20020 | 0.93208 | 11.413  | 0.93242 | 11.417  | 0.038900  | 0.0098800  |
| 200.205.722.656.250 | 0.96860 | 10.143  | 0.97094 | 10.166  | -0.0066700 | 0.0075600   | 20021 | 0.94703 | 11.460  | 0.94738 | 11.463  | 0.033800  | -0.029700  |
| 200.207.871.093.750 | 0.96747 | 10.163  | 0.96985 | 10.187  | -0.0043600 | 0.0070300   | 20021 | 0.95017 | 11.482  | 0.95053 | 11.485  | 0.023100  | -0.012600  |
| 200.211.074.218.750 | 0.96627 | 10.192  | 0.96872 | 10.216  | -0.0029100 | 0.0049800   | 20021 | 0.95937 | 11.503  | 0.95974 | 11.506  | 0.027100  | -0.0026800 |
| 200.214.277.343.750 | 0.96560 | 10.218  | 0.96813 | 10.243  | -0.0011700 | 0.0057000   | 20021 | 0.96752 | 11.512  | 0.96790 | 11.516  | 0.021300  | -0.018000  |
| 200.217.500.000.000 | 0.96551 | 10.242  | 0.96811 | 10.268  | 0.00075600 | 0.0053800   | 20022 | 0.97310 | 11.513  | 0.97348 | 11.517  | 0.015500  | 0.012300   |
| 200.220.703.125.000 | 0.96609 | 10.264  | 0.96875 | 10.290  | 0.0022800  | 0.0045600   | 20022 | 0.97746 | 11.508  | 0.97786 | 11.512  | 0.029200  | 0.022000   |
| 200.222.851.562.500 | 0.96673 | 10.277  | 0.96945 | 10.304  | 0.0031900  | 0.0028700   | 20022 | 0.98873 | 11.503  | 0.98913 | 11.507  | 0.027300  | -0.039000  |
| 200.226.054.687.500 | 0.96780 | 10.295  | 0.97058 | 10.323  | 0.0038100  | 0.0028600   | 20023 | 0.99206 | 11.495  | 0.99247 | 11.499  | 0.0083700 | -0.0052300 |
| 200.229.257.812.500 | 0.96918 | 10.311  | 0.97203 | 10.340  | 0.0050200  | 0.0037300   | 20023 | 0.99409 | 11.486  | 0.99451 | 11.490  | 0.023900  | 0.029000   |
| 200.232.480.468.750 | 0.97103 | 10.326  | 0.97395 | 10.355  | 0.0062100  | 0.0031000   | 20023 | 10.074  | 11.477  | 10.079  | 11.482  | 0.027000  | -0.0088900 |
| 200.235.683.593.750 | 0.97316 | 10.338  | 0.97616 | 10.368  | 0.0070200  | 0.0019600   | 20024 | 10.115  | 11.469  | 10.119  | 11.473  | 0.018200  | -0.0066900 |
| 200.238.886.718.750 | 0.97552 | 10.349  | 0.97859 | 10.380  | 0.0074700  | 0.00091700  | 20024 | 10.191  | 11.460  | 10.196  | 11.464  | 0.022800  | -0.0030900 |
| 200.241.035.156.250 | 0.97717 | 10.356  | 0.98028 | 10.387  | 0.0075100  | -0.00088400 | 20024 | 10.237  | 11.454  | 10.241  | 11.458  | 0.016600  | -0.024300  |
| 200.244.238.281.250 | 0.97954 | 10.364  | 0.98272 | 10.396  | 0.0070000  | -0.00088300 | 20024 | 10.280  | 11.445  | 10.284  | 11.450  | 0.0097700 | 0.0030300  |
| 200.247.460.937.500 | 0.98166 | 10.371  | 0.98491 | 10.403  | 0.0069400  | 8,73E-03    | 20025 | 10.299  | 11.436  | 10.304  | 11.441  | 0.018500  | 0.012800   |
| 200.250.664.062.500 | 0.98399 | 10.376  | 0.98732 | 10.410  | 0.0070000  | -0.00069700 | 20025 | 10.399  | 11.427  | 10.403  | 11.432  | 0.018000  | -0.0064900 |
| 200.253.867.187.500 | 0.98614 | 10.381  | 0.98954 | 10.415  | 0.0064900  | -0.0012800  | 20025 | 10.415  | 11.418  | 10.420  | 11.423  | 0.014300  | -0.0087200 |
| 200.257.089.843.750 | 0.98817 | 10.384  | 0.99164 | 10.419  | 0.0061700  | -0.0019500  | 20026 | 10.491  | 11.409  | 10.496  | 11.414  | 0.012400  | -0.0085000 |
| 200.259.218.750.000 | 0.98945 | 10.385  | 0.99296 | 10.420  | 0.0054500  | -0.0023000  | 20026 | 10.481  | 11.403  | 10.486  | 11.408  | 0.0098000 | 0.018900   |
| 200.262.441.406.250 | 0.99108 | 10.387  | 0.99467 | 10.423  | 0.0049400  | -0.0019800  | 20026 | 10.543  | 11.393  | 10.548  | 11.398  | 0.022500  | 0.023800   |
| 200.265.644.531.250 | 0.99262 | 10.387  | 0.99628 | 10.424  | 0.0041800  | -0.0022200  | 20027 | 10.626  | 11.384  | 10.631  | 11.389  | 0.025000  | -0.018500  |
| 200.268.847.656.250 | 0.99376 | 10.387  | 0.99749 | 10.424  | 0.0035200  | -0.0014600  | 20027 | 10.704  | 11.375  | 10.709  | 11.380  | 0.010600  | -0.028800  |
| 200.272.070.312.500 | 0.99489 | 10.386  | 0.99868 | 10.424  | 0.0032400  | -0.0020800  | 20027 | 10.694  | 11.365  | 10.699  | 11.370  | 0.0065400 | 0.020100   |
| 200.274.199.218.750 | 0.99550 | 10.385  | 0.99934 | 10.424  | 0.0024100  | -0.0025800  | 20027 | 10.739  | 11.359  | 10.744  | 11.364  | 0.021400  | 0.016700   |
| 200.277.421.875.000 | 0.99618 | 10.383  | 10.001  | 10.422  | 0.0018600  | -0.0012700  | 20028 | 10.808  | 11.349  | 10.814  | 11.355  | 0.015500  | -0.021500  |

|                     |         |        |        |        |           |             |       |        |        |        |        |             |             |
|---------------------|---------|--------|--------|--------|-----------|-------------|-------|--------|--------|--------|--------|-------------|-------------|
| 200.280.625.000.000 | 0.99669 | 10.381 | 10.007 | 10.421 | 0.0015900 | -0.00095900 | 20028 | 10.838 | 11.340 | 10.844 | 11.345 | 0.0075600   | -0.010200   |
| 200.283.847.656.250 | 0.99720 | 10.378 | 10.013 | 10.419 | 0.0012500 | -0.00090000 | 20028 | 10.857 | 11.330 | 10.863 | 11.336 | 0.0089500   | 0.016400    |
| 200.287.050.781.250 | 0.99749 | 10.375 | 10.016 | 10.416 | 0.0010200 | -0.00020500 | 20029 | 10.896 | 11.320 | 10.902 | 11.326 | 0.018100    | 0.016500    |
| 200.290.253.906.250 | 0.99785 | 10.372 | 10.020 | 10.414 | 0.0011100 | 0.00066100  | 20029 | 10.973 | 11.311 | 10.978 | 11.316 | 0.019500    | -0.020300   |
| 200.292.402.343.750 | 0.99809 | 10.370 | 10.023 | 10.412 | 0.0013700 | 0.00065800  | 20029 | 11.000 | 11.304 | 11.006 | 11.310 | 0.0071900   | -0.024300   |
| 200.295.605.468.750 | 0.99858 | 10.366 | 10.029 | 10.409 | 0.0014700 | -0.00016100 | 20030 | 11.011 | 11.294 | 11.017 | 11.300 | 0.0064700   | 0.0063300   |
| 200.298.828.125.000 | 0.99903 | 10.363 | 10.034 | 10.407 | 0.0012700 | 4,00E-02    | 20030 | 11.042 | 11.284 | 11.048 | 11.290 | 0.011300    | 0.014900    |
| 200.302.031.250.000 | 0.99940 | 10.360 | 10.039 | 10.404 | 0.0014700 | 0.0010000   | 20030 | 11.084 | 11.274 | 11.090 | 11.280 | 0.016000    | 0.0096800   |
| 200.305.253.906.250 | 0.99998 | 10.357 | 10.045 | 10.402 | 0.0019100 | 0.0017600   | 20031 | 11.145 | 11.264 | 11.151 | 11.270 | 0.017500    | -0.013800   |
| 200.307.382.812.500 | 10.004  | 10.355 | 10.050 | 10.400 | 0.0024100 | 0.0017800   | 20031 | 11.177 | 11.258 | 11.183 | 11.264 | 0.0086400   | -0.025300   |
| 200.310.605.468.750 | 10.013  | 10.351 | 10.059 | 10.398 | 0.0028600 | 0.0013100   | 20031 | 11.191 | 11.248 | 11.197 | 11.254 | 0.0039000   | 0.0067800   |
| 200.313.808.593.750 | 10.023  | 10.348 | 10.070 | 10.395 | 0.0032500 | 0.00088900  | 20031 | 11.202 | 11.238 | 11.208 | 11.244 | 0.013000    | 0.018500    |
| 200.317.031.250.000 | 10.034  | 10.345 | 10.081 | 10.393 | 0.0034300 | 0.0021400   | 20032 | 11.275 | 11.228 | 11.281 | 11.234 | 0.015800    | -0.018700   |
| 200.320.234.375.000 | 10.045  | 10.342 | 10.093 | 10.391 | 0.0046300 | 0.0031000   | 20032 | 11.303 | 11.217 | 11.310 | 11.224 | 0.00098100  | -0.015400   |
| 200.323.457.031.250 | 10.063  | 10.339 | 10.113 | 10.388 | 0.0054300 | 0.0012000   | 20032 | 11.281 | 11.207 | 11.287 | 11.214 | 0.0058700   | 0.015200    |
| 200.327.734.375.000 | 10.085  | 10.335 | 10.136 | 10.385 | 0.0055300 | 0.0015300   | 20033 | 11.347 | 11.194 | 11.354 | 11.200 | 0.012400    | 0.0071500   |
| 200.330.957.031.250 | 10.105  | 10.332 | 10.156 | 10.383 | 0.0065800 | 0.0021900   | 20033 | 11.374 | 11.183 | 11.381 | 11.190 | 0.011200    | -0.0099600  |
| 200.335.234.375.000 | 10.135  | 10.328 | 10.187 | 10.380 | 0.0071700 | 0.0011800   | 20034 | 11.432 | 11.170 | 11.438 | 11.176 | 0.0049500   | -0.014000   |
| 200.339.511.718.750 | 10.166  | 10.324 | 10.219 | 10.377 | 0.0075800 | 0.0010200   | 20034 | 11.416 | 11.156 | 11.423 | 11.163 | -0.00077200 | 0.0011200   |
| 200.343.808.593.750 | 10.200  | 10.320 | 10.253 | 10.374 | 0.0080500 | 0.0012200   | 20034 | 11.425 | 11.142 | 11.432 | 11.149 | 0.0059100   | 0.0065700   |
| 200.348.085.937.500 | 10.235  | 10.316 | 10.290 | 10.371 | 0.0086300 | 0.0011700   | 20035 | 11.467 | 11.128 | 11.474 | 11.135 | 0.0048600   | -0.0076000  |
| 200.352.363.281.250 | 10.273  | 10.313 | 10.329 | 10.368 | 0.0090500 | 0.00080400  | 20035 | 11.467 | 11.115 | 11.474 | 11.122 | -0.00058300 | -0.0033900  |
| 200.356.660.156.250 | 10.313  | 10.309 | 10.369 | 10.365 | 0.0093200 | 0.00074900  | 20036 | 11.462 | 11.101 | 11.469 | 11.108 | 0.0019600   | 0.0069100   |
| 200.360.937.500.000 | 10.353  | 10.305 | 10.411 | 10.363 | 0.0096900 | 0.00045700  | 20036 | 11.483 | 11.087 | 11.491 | 11.094 | 0.0053400   | 0.0013400   |
| 200.365.234.375.000 | 10.396  | 10.301 | 10.454 | 10.360 | 0.0097100 | 0.00024500  | 20037 | 11.508 | 11.073 | 11.515 | 11.080 | 0.0031100   | -0.0100000  |
| 200.369.511.718.750 | 10.437  | 10.298 | 10.496 | 10.357 | 0.0099000 | 0.0010100   | 20037 | 11.510 | 11.059 | 11.517 | 11.066 | -0.0032300  | -0.0090000  |
| 200.373.789.062.500 | 10.480  | 10.294 | 10.541 | 10.355 | 0.010600  | 0.0014000   | 20037 | 11.480 | 11.045 | 11.488 | 11.052 | -0.0046000  | 0.0046500   |
| 200.379.160.156.250 | 10.539  | 10.290 | 10.600 | 10.351 | 0.011300  | 0.00050700  | 20038 | 11.466 | 11.027 | 11.473 | 11.035 | 0.0012600   | 0.011300    |
| 200.383.437.500.000 | 10.589  | 10.286 | 10.651 | 10.349 | 0.011100  | -0.00061200 | 20038 | 11.492 | 11.013 | 11.500 | 11.021 | 0.0062700   | -1,59E-01   |
| 200.387.734.375.000 | 10.633  | 10.283 | 10.697 | 10.346 | 0.010700  | -0.00014100 | 20039 | 11.519 | 10.999 | 11.527 | 11.007 | 0.0012500   | -0.010100   |
| 200.393.085.937.500 | 10.693  | 10.279 | 10.757 | 10.343 | 0.010900  | 0.00015500  | 20039 | 11.504 | 10.982 | 11.512 | 10.990 | -0.0034800  | -0.0016700  |
| 200.398.437.500.000 | 10.751  | 10.274 | 10.816 | 10.340 | 0.010900  | -0.0010400  | 20040 | 11.482 | 10.965 | 11.490 | 10.972 | -0.00054300 | 0.00081000  |
| 200.402.734.375.000 | 10.798  | 10.271 | 10.864 | 10.338 | 0.0099200 | -0.0020800  | 20040 | 11.499 | 10.951 | 11.507 | 10.958 | -0.0027000  | -0.0067100  |
| 200.408.085.937.500 | 10.846  | 10.267 | 10.914 | 10.335 | 0.0088900 | -0.0018000  | 20041 | 11.456 | 10.933 | 11.464 | 10.941 | -0.0070200  | -0.00091700 |
| 200.413.437.500.000 | 10.893  | 10.263 | 10.962 | 10.332 | 0.0079900 | -0.0021500  | 20041 | 11.424 | 10.916 | 11.432 | 10.924 | -0.0036800  | 0.0096700   |

|                     |         |        |         |        |            |             |       |        |        |        |        |             |             |
|---------------------|---------|--------|---------|--------|------------|-------------|-------|--------|--------|--------|--------|-------------|-------------|
| 200.418.808.593.750 | 10.932  | 10.259 | 11.002  | 10.329 | 0.0065900  | -0.0033800  | 20042 | 11.417 | 10.898 | 11.425 | 10.907 | 0.0033500   | 0.0046700   |
| 200.423.085.937.500 | 10.956  | 10.256 | 11.028  | 10.327 | 0.0047300  | -0.0039200  | 20042 | 11.456 | 10.885 | 11.464 | 10.893 | 0.00082400  | -0.0050500  |
| 200.428.457.031.250 | 10.978  | 10.252 | 11.050  | 10.324 | 0.0028100  | -0.0044500  | 20043 | 11.425 | 10.867 | 11.433 | 10.876 | -0.0015300  | -0.0038600  |
| 200.433.808.593.750 | 10.987  | 10.248 | 11.060  | 10.321 | -3,83E-01  | -0.0047000  | 20043 | 11.440 | 10.850 | 11.448 | 10.858 | -0.0033100  | -0.0029500  |
| 200.440.253.906.250 | 10.977  | 10.243 | 11.052  | 10.318 | -0.0027300 | -0.0047300  | 20044 | 11.386 | 10.830 | 11.394 | 10.838 | -0.0050000  | -0.0012300  |
| 200.445.605.468.750 | 10.954  | 10.240 | 11.030  | 10.316 | -0.0056200 | -0.0048900  | 20045 | 11.381 | 10.812 | 11.389 | 10.821 | -0.0047600  | 0.00083700  |
| 200.450.976.562.500 | 10.917  | 10.236 | 10.994  | 10.313 | -0.0079800 | -0.0047000  | 20045 | 11.335 | 10.796 | 11.343 | 10.804 | -0.0041000  | 0.00045600  |
| 200.456.328.125.000 | 10.869  | 10.232 | 10.947  | 10.311 | -0.010700  | -0.0039800  | 20046 | 11.337 | 10.779 | 11.346 | 10.787 | -0.0042700  | -0.00041400 |
| 200.462.753.906.250 | 10.791  | 10.228 | 10.871  | 10.308 | -0.012700  | -0.0026400  | 20046 | 11.284 | 10.759 | 11.293 | 10.767 | -0.0045900  | 0.0023200   |
| 200.468.125.000.000 | 10.719  | 10.224 | 10.800  | 10.305 | -0.013800  | -0.0020100  | 20047 | 11.283 | 10.742 | 11.291 | 10.751 | -0.0015400  | -0.0030600  |
| 200.473.496.093.750 | 10.643  | 10.221 | 10.725  | 10.303 | -0.014800  | -0.0014800  | 20047 | 11.268 | 10.725 | 11.277 | 10.734 | -0.0078800  | -0.0046100  |
| 200.479.921.875.000 | 10.545  | 10.217 | 10.628  | 10.300 | -0.015500  | -0.00042100 | 20048 | 11.190 | 10.706 | 11.199 | 10.715 | -0.0069700  | 0.0018800   |
| 200.486.367.187.500 | 10.444  | 10.213 | 10.528  | 10.298 | -0.015400  | 0.00061100  | 20049 | 11.178 | 10.686 | 11.187 | 10.695 | -0.0054500  | 0.00018800  |
| 200.491.718.750.000 | 10.363  | 10.209 | 10.449  | 10.296 | -0.014800  | 0.00097500  | 20049 | 11.125 | 10.670 | 11.134 | 10.679 | -0.0067500  | -0.00094300 |
| 200.498.164.062.500 | 10.269  | 10.206 | 10.357  | 10.293 | -0.014200  | 0.0012900   | 20050 | 11.098 | 10.651 | 11.107 | 10.660 | -0.0065700  | -4,30E-01   |
| 200.504.589.843.750 | 10.180  | 10.202 | 10.269  | 10.291 | -0.013100  | 0.0020600   | 20050 | 11.041 | 10.632 | 11.050 | 10.641 | -0.0068100  | 0.00012200  |
| 200.511.035.156.250 | 10.100  | 10.198 | 10.190  | 10.288 | -0.011600  | 0.0023800   | 20051 | 11.011 | 10.614 | 11.020 | 10.623 | -0.0064100  | -0.0010200  |
| 200.517.460.937.500 | 10.031  | 10.194 | 10.123  | 10.286 | -0.010100  | 0.0023500   | 20052 | 10.958 | 10.595 | 10.968 | 10.605 | -0.0081200  | 0.00021400  |
| 200.523.906.250.000 | 0.99698 | 10.190 | 10.063  | 10.284 | -0.0085500 | 0.0026500   | 20052 | 10.906 | 10.577 | 10.915 | 10.586 | -0.0061300  | -0.00063800 |
| 200.530.351.562.500 | 0.99211 | 10.187 | 10.016  | 10.281 | -0.0066700 | 0.0028400   | 20053 | 10.879 | 10.559 | 10.889 | 10.569 | -0.0089400  | -0.0051800  |
| 200.536.777.343.750 | 0.98839 | 10.183 | 0.99799 | 10.279 | -0.0048900 | 0.0028000   | 20054 | 10.791 | 10.542 | 10.800 | 10.551 | -0.012800   | 0.00024800  |
| 200.543.222.656.250 | 0.98582 | 10.180 | 0.99555 | 10.277 | -0.0030600 | 0.0027400   | 20054 | 10.715 | 10.525 | 10.724 | 10.534 | -0.0086200  | 0.0062100   |
| 200.549.667.968.750 | 0.98445 | 10.176 | 0.99432 | 10.275 | -0.0013600 | 0.0021300   | 20055 | 10.680 | 10.508 | 10.689 | 10.517 | -0.0047900  | 0.0016300   |
| 200.557.167.968.750 | 0.98393 | 10.172 | 0.99396 | 10.273 | -8,76E-01  | 0.0017000   | 20056 | 10.648 | 10.488 | 10.657 | 10.498 | -0.0063500  | -0.0021900  |
| 200.563.613.281.250 | 0.98432 | 10.169 | 0.99450 | 10.271 | 0.0010100  | 0.0016900   | 20056 | 10.591 | 10.472 | 10.601 | 10.482 | -0.0078400  | -0.00083100 |
| 200.570.058.593.750 | 0.98523 | 10.166 | 0.99555 | 10.269 | 0.0020900  | 0.0015100   | 20057 | 10.547 | 10.456 | 10.556 | 10.466 | -0.0074200  | 0.00011100  |
| 200.577.578.125.000 | 0.98724 | 10.162 | 0.99772 | 10.267 | 0.0031200  | 0.0013200   | 20058 | 10.488 | 10.438 | 10.497 | 10.448 | -0.0076900  | -0.00054100 |
| 200.584.023.437.500 | 0.98959 | 10.159 | 10.002  | 10.265 | 0.0039400  | 0.00081900  | 20058 | 10.439 | 10.423 | 10.449 | 10.433 | -0.0081700  | -0.0019500  |
| 200.591.523.437.500 | 0.99273 | 10.155 | 10.035  | 10.263 | 0.0042600  | 0.00023200  | 20059 | 10.374 | 10.406 | 10.383 | 10.416 | -0.010400   | 0.0020500   |
| 200.599.042.968.750 | 0.99600 | 10.152 | 10.069  | 10.261 | 0.0042800  | -0.00021700 | 20060 | 10.283 | 10.390 | 10.293 | 10.400 | -0.0051000  | 0.0069700   |
| 200.605.488.281.250 | 0.99871 | 10.148 | 10.098  | 10.259 | 0.0039600  | -0.00051900 | 20061 | 10.303 | 10.376 | 10.312 | 10.386 | -0.00067100 | -0.0015000  |
| 200.613.007.812.500 | 10.015  | 10.145 | 10.128  | 10.257 | 0.0035600  | -0.00063600 | 20061 | 10.274 | 10.361 | 10.283 | 10.371 | -0.0071900  | -0.0056900  |
| 200.620.527.343.750 | 10.041  | 10.142 | 10.155  | 10.256 | 0.0030100  | -0.00084200 | 20062 | 10.194 | 10.346 | 10.204 | 10.356 | -0.0092300  | 0.0030500   |
| 200.628.046.875.000 | 10.061  | 10.138 | 10.176  | 10.254 | 0.0022900  | -0.0010300  | 20063 | 10.135 | 10.332 | 10.144 | 10.342 | -0.0026100  | 0.0044300   |
| 200.635.566.406.250 | 10.075  | 10.135 | 10.193  | 10.252 | 0.0014500  | -0.0012300  | 20064 | 10.155 | 10.318 | 10.165 | 10.328 | -0.0025800  | -0.0022900  |



|                     |         |        |         |        |             |             |       |         |        |         |        |             |             |
|---------------------|---------|--------|---------|--------|-------------|-------------|-------|---------|--------|---------|--------|-------------|-------------|
| 200.643.085.937.500 | 10.082  | 10.132 | 10.201  | 10.251 | 0.00043700  | -0.0012800  | 20064 | 10.096  | 10.305 | 10.106  | 10.315 | -0.0060500  | -5,89E-01   |
| 200.650.605.468.750 | 10.082  | 10.128 | 10.202  | 10.249 | -0.00047500 | -0.00094600 | 20065 | 10.064  | 10.292 | 10.074  | 10.302 | -0.0026600  | 0.0021100   |
| 200.659.199.218.750 | 10.075  | 10.125 | 10.197  | 10.247 | -0.0010900  | -0.00078900 | 20066 | 10.053  | 10.279 | 10.063  | 10.288 | -0.0026400  | -0.00048900 |
| 200.666.718.750.000 | 10.064  | 10.122 | 10.188  | 10.246 | -0.0017500  | -0.00086800 | 20067 | 10.022  | 10.267 | 10.031  | 10.277 | -0.0034500  | 0.0011100   |
| 200.674.238.281.250 | 10.048  | 10.119 | 10.174  | 10.244 | -0.0023900  | -0.00063700 | 20067 | 10.001  | 10.256 | 10.011  | 10.265 | -0.00097200 | 0.0013700   |
| 200.682.851.562.500 | 10.026  | 10.115 | 10.153  | 10.243 | -0.0027700  | -0.00038500 | 20068 | 10.006  | 10.244 | 10.015  | 10.253 | -0.0012400  | 0.00025200  |
| 200.690.371.093.750 | 10.004  | 10.112 | 10.133  | 10.241 | -0.0030100  | -0.00026500 | 20069 | 0.99813 | 10.234 | 0.99906 | 10.243 | -0.00056500 | 0.0017100   |
| 200.697.890.625.000 | 0.99803 | 10.109 | 10.111  | 10.240 | -0.0031700  | -0.00010700 | 20070 | 0.99974 | 10.224 | 10.007  | 10.234 | 0.0013300   | -7,30E-01   |
| 200.706.484.375.000 | 0.99527 | 10.106 | 10.085  | 10.238 | -0.0031900  | 5,71E-01    | 20071 | 10.003  | 10.214 | 10.012  | 10.223 | -0.00068300 | -0.0018700  |
| 200.715.097.656.250 | 0.99255 | 10.102 | 10.060  | 10.237 | -0.0030700  | 0.00023600  | 20072 | 0.99857 | 10.204 | 0.99949 | 10.214 | -0.0019000  | -0.00069600 |
| 200.722.617.187.500 | 0.99031 | 10.100 | 10.039  | 10.236 | -0.0028000  | 0.00051900  | 20072 | 0.99720 | 10.196 | 0.99811 | 10.206 | -0.0018100  | 0.0010500   |
| 200.731.210.937.500 | 0.98803 | 10.096 | 10.018  | 10.234 | -0.0022400  | 0.00076200  | 20073 | 0.99566 | 10.188 | 0.99656 | 10.197 | -0.00021100 | 0.0012100   |
| 200.739.824.218.750 | 0.98646 | 10.093 | 10.005  | 10.233 | -0.0014900  | 0.00090200  | 20074 | 0.99684 | 10.180 | 0.99774 | 10.189 | 0.00027500  | 0.00094900  |
| 200.748.417.968.750 | 0.98546 | 10.090 | 0.99965 | 10.232 | -0.00068300 | 0.0011700   | 20075 | 0.99613 | 10.172 | 0.99702 | 10.181 | 0.0014200   | 0.0011300   |
| 200.757.031.250.000 | 0.98528 | 10.087 | 0.99965 | 10.230 | 0.00051900  | 0.0014100   | 20076 | 0.99928 | 10.165 | 10.002  | 10.174 | 0.0022100   | -0.0017600  |
| 200.765.625.000.000 | 0.98636 | 10.084 | 10.009  | 10.229 | 0.0017400   | 0.0014900   | 20077 | 0.99994 | 10.159 | 10.008  | 10.167 | -0.0016100  | -0.0025100  |
| 200.774.238.281.250 | 0.98828 | 10.080 | 10.030  | 10.228 | 0.0030800   | 0.0015700   | 20077 | 0.99651 | 10.153 | 0.99738 | 10.161 | -0.0021000  | 0.0012900   |
| 200.782.851.562.500 | 0.99165 | 10.077 | 10.066  | 10.227 | 0.0044400   | 0.0014900   | 20078 | 0.99632 | 10.147 | 0.99717 | 10.156 | 0.00060400  | 0.0022300   |
| 200.791.445.312.500 | 0.99593 | 10.074 | 10.110  | 10.225 | 0.0056400   | 0.0012900   | 20079 | 0.99755 | 10.142 | 0.99840 | 10.151 | 0.0017400   | -0.00045300 |
| 200.801.132.812.500 | 10.020  | 10.071 | 10.173  | 10.224 | 0.0068000   | 0.0010400   | 20080 | 0.99949 | 10.137 | 10.003  | 10.145 | -0.00022500 | -0.00093500 |
| 200.809.746.093.750 | 10.084  | 10.068 | 10.239  | 10.223 | 0.0075400   | 0.00047100  | 20081 | 0.99714 | 10.133 | 0.99796 | 10.141 | 2,49E-01    | 0.00055800  |
| 200.818.359.375.000 | 10.150  | 10.065 | 10.306  | 10.222 | 0.0076100   | -5,74E-01   | 20082 | 0.99954 | 10.130 | 10.003  | 10.138 | 0.00073600  | -0.0016200  |
| 200.828.046.875.000 | 10.223  | 10.061 | 10.382  | 10.220 | 0.0074300   | -0.00047600 | 20083 | 0.99849 | 10.126 | 0.99928 | 10.134 | -0.0029500  | -0.00043100 |
| 200.836.660.156.250 | 10.286  | 10.058 | 10.446  | 10.219 | 0.0067400   | -0.00096900 | 20084 | 0.99414 | 10.123 | 0.99492 | 10.131 | -5,18E-01   | 0.0040400   |
| 200.846.347.656.250 | 10.346  | 10.055 | 10.509  | 10.218 | 0.0056600   | -0.0012800  | 20085 | 0.99839 | 10.121 | 0.99916 | 10.128 | 0.0044500   | 0.00038800  |
| 200.856.035.156.250 | 10.395  | 10.051 | 10.560  | 10.216 | 0.0042600   | -0.0018600  | 20086 | 10.028  | 10.119 | 10.035  | 10.126 | 0.00070100  | -0.0030400  |
| 200.864.648.437.500 | 10.424  | 10.048 | 10.591  | 10.215 | 0.0022500   | -0.0022100  | 20086 | 0.99968 | 10.117 | 10.004  | 10.125 | -0.0011200  | -0.00033200 |
| 200.874.335.937.500 | 10.437  | 10.045 | 10.606  | 10.214 | 0.00020500  | -0.0021900  | 20087 | 10.007  | 10.116 | 10.014  | 10.123 | 9,33E-01    | 0.00026600  |
| 200.884.023.437.500 | 10.428  | 10.041 | 10.599  | 10.212 | -0.0020000  | -0.0022400  | 20088 | 0.99986 | 10.116 | 10.006  | 10.123 | -0.00060800 | -0.00040000 |
| 200.893.710.937.500 | 10.398  | 10.038 | 10.571  | 10.211 | -0.0041300  | -0.0019700  | 20089 | 0.99953 | 10.115 | 10.002  | 10.122 | -0.00068200 | 0.00048600  |
| 200.903.417.968.750 | 10.348  | 10.034 | 10.523  | 10.209 | -0.0058200  | -0.0016200  | 20090 | 0.99853 | 10.115 | 0.99919 | 10.122 | 0.00033500  | 0.00097400  |
| 200.913.105.468.750 | 10.285  | 10.030 | 10.462  | 10.208 | -0.0072600  | -0.0011500  | 20091 | 10.002  | 10.116 | 10.008  | 10.122 | 0.0012100   | 0.00018900  |
| 200.922.792.968.750 | 10.207  | 10.027 | 10.387  | 10.206 | -0.0080400  | -0.00051500 | 20092 | 10.009  | 10.117 | 10.015  | 10.123 | 0.00070100  | -0.00047200 |
| 200.932.500.000.000 | 10.129  | 10.023 | 10.310  | 10.205 | -0.0082600  | -6,42E-01   | 20093 | 10.015  | 10.118 | 10.021  | 10.124 | 0.00029200  | -0.00070600 |
| 200.942.187.500.000 | 10.047  | 10.019 | 10.230  | 10.203 | -0.0081700  | 0.00041800  | 20094 | 10.014  | 10.120 | 10.020  | 10.126 | -0.00066800 | -0.00045500 |

|                     |         |         |         |        |             |             |       |        |        |        |        |             |             |
|---------------------|---------|---------|---------|--------|-------------|-------------|-------|--------|--------|--------|--------|-------------|-------------|
| 200.952.968.750.000 | 0.99617 | 10.015  | 10.148  | 10.201 | -0.0074100  | 0.0010300   | 20095 | 10.002 | 10.122 | 10.007 | 10.127 | -0.00063900 | 0.00041100  |
| 200.962.675.781.250 | 0.98952 | 10.012  | 10.083  | 10.200 | -0.0060700  | 0.0014600   | 20096 | 10.001 | 10.124 | 10.007 | 10.129 | 0.00017400  | 0.00080100  |
| 200.972.382.812.500 | 0.98439 | 10.008  | 10.034  | 10.198 | -0.0045700  | 0.0014100   | 20097 | 10.005 | 10.127 | 10.010 | 10.132 | 0.00091500  | 0.00054500  |
| 200.983.144.531.250 | 0.98016 | 10.004  | 0.99939 | 10.196 | -0.0031800  | 0.0014300   | 20098 | 10.020 | 10.130 | 10.025 | 10.134 | 0.0012900   | -0.00071900 |
| 200.992.851.562.500 | 0.97788 | 10.000  | 0.99732 | 10.194 | -0.0016400  | 0.0013700   | 20099 | 10.031 | 10.133 | 10.036 | 10.137 | -0.00055700 | -2,83E-01   |
| 201.003.632.812.500 | 0.97680 | 0.99958 | 0.99646 | 10.193 | -0.00037800 | 0.0010500   | 20100 | 10.009 | 10.136 | 10.013 | 10.141 | 0.0012300   | 0.00060500  |
| 201.014.414.062.500 | 0.97706 | 0.99916 | 0.99696 | 10.191 | 0.00061000  | 0.00079500  | 20101 | 10.058 | 10.140 | 10.062 | 10.144 | 0.00074700  | -0.0015200  |
| 201.024.121.093.750 | 0.97804 | 0.99878 | 0.99815 | 10.189 | 0.0012500   | 0.00042700  | 20102 | 10.024 | 10.144 | 10.027 | 10.148 | -0.0018800  | -0.00013900 |
| 201.034.902.343.750 | 0.97963 | 0.99835 | 0.99996 | 10.187 | 0.0014800   | 9,09E-01    | 20103 | 10.019 | 10.148 | 10.023 | 10.152 | 0.00046300  | 0.0030300   |
| 201.045.703.125.000 | 0.98125 | 0.99792 | 10.018  | 10.185 | 0.0014500   | -9,48E-01   | 20105 | 10.034 | 10.153 | 10.037 | 10.156 | 0.0046500   | 0.00072000  |
| 201.056.484.375.000 | 0.98275 | 0.99749 | 10.035  | 10.183 | 0.0012800   | -0.00016600 | 20106 | 10.120 | 10.157 | 10.122 | 10.160 | 0.0020200   | -0.0025100  |
| 201.067.265.625.000 | 0.98401 | 0.99706 | 10.050  | 10.181 | 0.0010900   | -0.00015900 | 20107 | 10.077 | 10.162 | 10.080 | 10.165 | -0.00075500 | 0.00054700  |
| 201.078.066.406.250 | 0.98510 | 0.99663 | 10.064  | 10.179 | 0.00093800  | -0.00017400 | 20108 | 10.103 | 10.167 | 10.105 | 10.169 | 0.0032000   | 0.00099800  |
| 201.088.847.656.250 | 0.98603 | 0.99619 | 10.075  | 10.177 | 0.00071300  | -0.00015100 | 20109 | 10.146 | 10.172 | 10.148 | 10.174 | 0.0014000   | -0.00045600 |
| 201.099.648.437.500 | 0.98663 | 0.99575 | 10.084  | 10.175 | 0.00061100  | -5,90E-01   | 20110 | 10.134 | 10.177 | 10.135 | 10.178 | 0.0022100   | 0.00025800  |
| 201.111.523.437.500 | 0.98742 | 0.99527 | 10.094  | 10.172 | 0.00057900  | -5,14E-01   | 20111 | 10.197 | 10.183 | 10.197 | 10.183 | 0.0019800   | -0.0012500  |
| 201.122.324.218.750 | 0.98795 | 0.99483 | 10.101  | 10.170 | 0.00049500  | 5,47E-02    | 20112 | 10.179 | 10.188 | 10.179 | 10.188 | -0.00062100 | -0.00064400 |
| 201.133.105.468.750 | 0.98849 | 0.99439 | 10.109  | 10.168 | 0.00059100  | 0.00013100  | 20113 | 10.183 | 10.193 | 10.183 | 10.193 | 0.00059100  | 0.0012100   |
| 201.144.980.468.750 | 0.98929 | 0.99390 | 10.120  | 10.166 | 0.00079100  | 0.00020000  | 20114 | 10.192 | 10.198 | 10.192 | 10.198 | 0.0021200   | 0.0010700   |
| 201.155.781.250.000 | 0.99028 | 0.99345 | 10.132  | 10.164 | 0.0010400   | 0.00032100  | 20116 | 10.231 | 10.203 | 10.230 | 10.202 | 0.0030200   | 7,84E-01    |
| 201.167.656.250.000 | 0.99165 | 0.99296 | 10.148  | 10.161 | 0.0015200   | 0.00049300  | 20117 | 10.261 | 10.208 | 10.259 | 10.207 | 0.0022900   | -0.00094000 |
| 201.178.457.031.250 | 0.99373 | 0.99252 | 10.171  | 10.159 | 0.0021600   | 0.00049300  | 20118 | 10.283 | 10.213 | 10.281 | 10.211 | 0.00089000  | -0.00065100 |
| 201.190.351.562.500 | 0.99656 | 0.99202 | 10.202  | 10.157 | 0.0026400   | 0.00037400  | 20119 | 10.281 | 10.218 | 10.278 | 10.215 | 0.00081700  | 0.00057800  |
| 201.202.226.562.500 | 100.000 | 0.99153 | 10.239  | 10.154 | 0.0030500   | 0.00034000  | 20120 | 10.303 | 10.222 | 10.300 | 10.220 | 0.0022600   | 0.00055800  |
| 201.213.027.343.750 | 10.035  | 0.99108 | 10.276  | 10.152 | 0.0034100   | 0.00021700  | 20121 | 10.332 | 10.226 | 10.329 | 10.223 | 0.0020800   | 3,48E-01    |
| 201.224.921.875.000 | 10.077  | 0.99058 | 10.321  | 10.150 | 0.0035400   | -8,16E-02   | 20122 | 10.350 | 10.231 | 10.346 | 10.227 | 0.0023400   | -0.00051200 |
| 201.236.816.406.250 | 10.119  | 0.99008 | 10.365  | 10.147 | 0.0033900   | -0.00023000 | 20124 | 10.388 | 10.234 | 10.384 | 10.230 | 0.00086500  | -0.00051600 |
| 201.248.691.406.250 | 10.158  | 0.98958 | 10.407  | 10.145 | 0.0030000   | -0.00042300 | 20125 | 10.370 | 10.238 | 10.366 | 10.233 | 0.0011200   | 0.00066600  |
| 201.260.585.937.500 | 10.190  | 0.98908 | 10.442  | 10.142 | 0.0023800   | -0.00063800 | 20126 | 10.414 | 10.241 | 10.409 | 10.236 | 0.0024500   | 0.00048200  |
| 201.272.480.468.750 | 10.215  | 0.98858 | 10.469  | 10.140 | 0.0014800   | -0.00085000 | 20127 | 10.429 | 10.244 | 10.423 | 10.239 | 0.0022600   | -0.00047200 |
| 201.284.375.000.000 | 10.225  | 0.98808 | 10.482  | 10.137 | 0.00036200  | -0.00088700 | 20128 | 10.468 | 10.247 | 10.462 | 10.241 | 0.0013200   | -0.00032400 |
| 201.297.343.750.000 | 10.224  | 0.98753 | 10.483  | 10.134 | -0.00072700 | -0.00088600 | 20130 | 10.462 | 10.250 | 10.454 | 10.243 | 0.0014600   | -0.00080900 |
| 201.309.257.812.500 | 10.207  | 0.98703 | 10.469  | 10.132 | -0.0018400  | -0.00085000 | 20131 | 10.504 | 10.252 | 10.497 | 10.244 | -0.00068700 | -0.00061300 |
| 201.321.152.343.750 | 10.180  | 0.98653 | 10.444  | 10.129 | -0.0027500  | -0.00064200 | 20132 | 10.445 | 10.254 | 10.437 | 10.246 | -3,14E-02   | 0.00030200  |
| 201.334.121.093.750 | 10.139  | 0.98598 | 10.406  | 10.127 | -0.0034400  | -0.00048300 | 20133 | 10.504 | 10.256 | 10.495 | 10.247 | 6,38E-01    | 4,80E-01    |

|                     |         |         |         |        |             |             |       |         |        |         |        |             |             |
|---------------------|---------|---------|---------|--------|-------------|-------------|-------|---------|--------|---------|--------|-------------|-------------|
| 201.346.035.156.250 | 10.094  | 0.98548 | 10.364  | 10.124 | -0.0039500  | -0.00034600 | 20135 | 10.447  | 10.257 | 10.437  | 10.248 | 0.00011600  | 0.00082800  |
| 201.359.003.906.250 | 10.041  | 0.98493 | 10.313  | 10.121 | -0.0043000  | -0.00025100 | 20136 | 10.507  | 10.259 | 10.497  | 10.249 | 0.0021200   | -0.00063900 |
| 201.370.917.968.750 | 0.99874 | 0.98442 | 10.262  | 10.119 | -0.0045800  | -0.00024700 | 20137 | 10.500  | 10.260 | 10.489  | 10.249 | -0.0014700  | -0.0010300  |
| 201.383.906.250.000 | 0.99266 | 0.98387 | 10.204  | 10.116 | -0.0049100  | -0.00021600 | 20138 | 10.470  | 10.261 | 10.459  | 10.249 | -0.00043600 | 0.00099400  |
| 201.396.894.531.250 | 0.98598 | 0.98333 | 10.140  | 10.113 | -0.0051400  | -6,70E-01   | 20140 | 10.488  | 10.261 | 10.476  | 10.249 | 0.0011100   | 0.00047800  |
| 201.409.882.812.500 | 0.97931 | 0.98278 | 10.076  | 10.111 | -0.0050900  | 8,11E-01    | 20141 | 10.499  | 10.262 | 10.486  | 10.249 | 0.00080400  | -0.00046700 |
| 201.421.796.875.000 | 0.97332 | 0.98228 | 10.019  | 10.108 | -0.0049400  | 0.00023600  | 20142 | 10.508  | 10.262 | 10.495  | 10.248 | -5,57E-01   | -0.00058200 |
| 201.434.785.156.250 | 0.96702 | 0.98173 | 0.99583 | 10.105 | -0.0045000  | 0.00043100  | 20143 | 10.498  | 10.261 | 10.483  | 10.247 | -0.00064500 | -0.00060200 |
| 201.447.792.968.750 | 0.96163 | 0.98118 | 0.99072 | 10.103 | -0.0038200  | 0.00057400  | 20145 | 10.492  | 10.261 | 10.476  | 10.246 | -0.0016200  | -0.00051400 |
| 201.460.781.250.000 | 0.95710 | 0.98063 | 0.98646 | 10.100 | -0.0030000  | 0.00064000  | 20146 | 10.456  | 10.261 | 10.440  | 10.245 | -0.0019800  | -0.00041200 |
| 201.473.789.062.500 | 0.95382 | 0.98009 | 0.98345 | 10.097 | -0.0021500  | 0.00053900  | 20147 | 10.440  | 10.260 | 10.423  | 10.243 | -0.0026900  | 0.00024500  |
| 201.487.871.093.750 | 0.95127 | 0.97950 | 0.98120 | 10.094 | -0.0015500  | 0.00037500  | 20149 | 10.383  | 10.259 | 10.365  | 10.241 | -0.0013200  | 0.0016100   |
| 201.500.878.906.250 | 0.94963 | 0.97896 | 0.97983 | 10.092 | -0.0011400  | 0.00028400  | 20150 | 10.404  | 10.257 | 10.386  | 10.239 | 0.0016700   | 0.00034100  |
| 201.513.867.187.500 | 0.94831 | 0.97842 | 0.97879 | 10.089 | -0.00080700 | 0.00023300  | 20151 | 10.426  | 10.256 | 10.407  | 10.237 | -0.00043400 | -0.0018800  |
| 201.526.875.000.000 | 0.94753 | 0.97787 | 0.97828 | 10.086 | -0.00053100 | 0.00014400  | 20153 | 10.393  | 10.254 | 10.373  | 10.234 | -0.0032200  | -0.00065800 |
| 201.540.976.562.500 | 0.94687 | 0.97729 | 0.97792 | 10.083 | -0.00041700 | 0.00010700  | 20154 | 10.339  | 10.252 | 10.318  | 10.231 | -0.0022200  | 0.00086600  |
| 201.553.984.375.000 | 0.94640 | 0.97675 | 0.97772 | 10.081 | -0.00024200 | 0.00019300  | 20155 | 10.333  | 10.250 | 10.311  | 10.229 | -0.00086900 | 0.00033800  |
| 201.568.085.937.500 | 0.94622 | 0.97617 | 0.97783 | 10.078 | 0.00010600  | 0.00032400  | 20157 | 10.316  | 10.248 | 10.293  | 10.225 | -0.0013000  | -0.00015500 |
| 201.581.093.750.000 | 0.94669 | 0.97564 | 0.97857 | 10.075 | 0.00063800  | 0.00041900  | 20158 | 10.298  | 10.246 | 10.274  | 10.222 | -0.0012900  | -0.00036000 |
| 201.595.195.312.500 | 0.94795 | 0.97506 | 0.98012 | 10.072 | 0.0012400   | 0.00040000  | 20160 | 10.281  | 10.243 | 10.256  | 10.218 | -0.0022800  | -0.00015500 |
| 201.609.296.875.000 | 0.95019 | 0.97449 | 0.98266 | 10.070 | 0.0017700   | 0.00030100  | 20161 | 10.233  | 10.240 | 10.208  | 10.215 | -0.0017300  | 0.00095900  |
| 201.623.398.437.500 | 0.95293 | 0.97392 | 0.98569 | 10.067 | 0.0020900   | 0.00019800  | 20162 | 10.232  | 10.237 | 10.205  | 10.211 | 0.00042600  | 0.00017500  |
| 201.636.425.781.250 | 0.95586 | 0.97340 | 0.98889 | 10.064 | 0.0023000   | 1,88E-01    | 20164 | 10.245  | 10.235 | 10.217  | 10.207 | -0.0012500  | -0.0010400  |
| 201.650.527.343.750 | 0.95918 | 0.97283 | 0.99251 | 10.062 | 0.0021400   | -0.00016600 | 20165 | 10.198  | 10.231 | 10.169  | 10.203 | -0.0024000  | -0.00024500 |
| 201.664.628.906.250 | 0.96189 | 0.97227 | 0.99551 | 10.059 | 0.0018400   | -0.00017300 | 20166 | 10.177  | 10.228 | 10.147  | 10.198 | -0.0019400  | 4,61E-02    |
| 201.678.750.000.000 | 0.96436 | 0.97171 | 0.99828 | 10.056 | 0.0016500   | -0.00017600 | 20168 | 10.143  | 10.224 | 10.112  | 10.194 | -0.0023900  | 0.00028700  |
| 201.692.851.562.500 | 0.96655 | 0.97116 | 10.008  | 10.054 | 0.0013400   | -0.00022700 | 20169 | 10.110  | 10.221 | 10.078  | 10.189 | -0.0011300  | 0.00049400  |
| 201.708.066.406.250 | 0.96828 | 0.97056 | 10.028  | 10.051 | 0.00098400  | -0.00026800 | 20171 | 10.110  | 10.217 | 10.077  | 10.184 | -0.00094200 | 2,47E-01    |
| 201.722.187.500.000 | 0.96944 | 0.97001 | 10.043  | 10.048 | 0.00055100  | -0.00032100 | 20172 | 10.082  | 10.213 | 10.048  | 10.179 | -0.0010600  | 1,91E-01    |
| 201.736.308.593.750 | 0.96984 | 0.96947 | 10.050  | 10.046 | 7,70E-01    | -0.00029900 | 20174 | 10.080  | 10.209 | 10.045  | 10.174 | -0.00088800 | 6,13E-01    |
| 201.750.429.687.500 | 0.96966 | 0.96893 | 10.051  | 10.043 | -0.00029400 | -0.00018300 | 20175 | 10.057  | 10.205 | 10.020  | 10.169 | -0.00088800 | -6,34E-01   |
| 201.765.625.000.000 | 0.96898 | 0.96835 | 10.047  | 10.041 | -0.00045900 | 3,63E-01    | 20177 | 10.054  | 10.201 | 10.016  | 10.163 | -0.0010700  | -0.00036900 |
| 201.779.765.625.000 | 0.96831 | 0.96782 | 10.043  | 10.038 | -0.00018700 | 0.00034400  | 20178 | 10.025  | 10.197 | 0.99864 | 10.158 | -0.0019700  | 1,71E-01    |
| 201.794.980.468.750 | 0.96843 | 0.96725 | 10.048  | 10.036 | 0.00055200  | 0.00062700  | 20179 | 0.99961 | 10.193 | 0.99558 | 10.152 | -0.0010200  | 0.00068300  |
| 201.809.101.562.500 | 0.96993 | 0.96673 | 10.066  | 10.034 | 0.0016500   | 0.00078900  | 20181 | 0.99954 | 10.188 | 0.99539 | 10.147 | 3,25E-01    | 0.00012100  |

|                     |         |         |         |         |            |             |       |         |        |         |         |             |             |
|---------------------|---------|---------|---------|---------|------------|-------------|-------|---------|--------|---------|---------|-------------|-------------|
| 201.824.316.406.250 | 0.97327 | 0.96617 | 10.102  | 10.031  | 0.0028700  | 0.00079000  | 20182 | 0.99970 | 10.184 | 0.99543 | 10.141  | -0.00066800 | -0.00028000 |
| 201.839.550.781.250 | 0.97866 | 0.96562 | 10.159  | 10.029  | 0.0040600  | 0.00071900  | 20184 | 0.99750 | 10.179 | 0.99310 | 10.135  | -0.00082100 | -6,38E-01   |
| 201.853.671.875.000 | 0.98518 | 0.96511 | 10.227  | 10.027  | 0.0049800  | 0.00044400  | 20185 | 0.99729 | 10.175 | 0.99276 | 10.130  | -0.00085500 | 0.00046300  |
| 201.868.906.250.000 | 0.99328 | 0.96457 | 10.311  | 10.024  | 0.0053600  | 7,10E-01    | 20187 | 0.99499 | 10.171 | 0.99032 | 10.124  | 0.00053700  | 0.00056500  |
| 201.884.140.625.000 | 10.015  | 0.96404 | 10.397  | 10.022  | 0.0051900  | -0.00026900 | 20188 | 0.99893 | 10.166 | 0.99412 | 10.118  | 0.00086700  | -0.00044300 |
| 201.899.355.468.750 | 10.091  | 0.96351 | 10.476  | 10.020  | 0.0045400  | -0.00057300 | 20190 | 0.99763 | 10.162 | 0.99269 | 10.112  | -0.00081100 | -0.00028700 |
| 201.914.589.843.750 | 10.153  | 0.96299 | 10.541  | 10.018  | 0.0034500  | -0.00080900 | 20191 | 0.99646 | 10.158 | 0.99138 | 10.107  | -7,08E-02   | 0.00031900  |
| 201.929.824.218.750 | 10.196  | 0.96247 | 10.587  | 10.016  | 0.0020800  | -0.00094800 | 20193 | 0.99761 | 10.153 | 0.99238 | 10.101  | 0.00016200  | 0.00046900  |
| 201.945.078.125.000 | 10.217  | 0.96196 | 10.611  | 10.014  | 0.00055900 | -0.0010200  | 20195 | 0.99695 | 10.149 | 0.99158 | 10.095  | 0.0014200   | 0.00041000  |
| 201.960.312.500.000 | 10.213  | 0.96145 | 10.611  | 10.012  | -0.0010200 | -0.00098700 | 20196 | 10.019  | 10.145 | 0.99643 | 10.090  | 0.0014100   | -0.00058200 |
| 201.976.640.625.000 | 10.185  | 0.96092 | 10.585  | 10.010  | -0.0025600 | -0.0010200  | 20198 | 10.014  | 10.140 | 0.99574 | 10.084  | -0.00041300 | -0.00016500 |
| 201.991.894.531.250 | 10.132  | 0.96042 | 10.536  | 10.008  | -0.0042400 | -0.0010300  | 20199 | 10.006  | 10.136 | 0.99482 | 10.078  | 0.00089300  | 0.00020400  |
| 202.007.128.906.250 | 10.055  | 0.95993 | 10.462  | 10.006  | -0.0057000 | -0.00081900 | 20201 | 10.041  | 10.133 | 0.99816 | 10.073  | 0.00020800  | -0.00057900 |
| 202.023.476.562.500 | 0.99523 | 0.95941 | 10.363  | 10.005  | -0.0068300 | -0.00065800 | 20202 | 10.013  | 10.129 | 0.99516 | 10.067  | -0.00093700 | 0.00036100  |
| 202.038.730.468.750 | 0.98395 | 0.95893 | 10.253  | 10.003  | -0.0077800 | -0.00049100 | 20204 | 10.012  | 10.125 | 0.99488 | 10.062  | 0.0013500   | 0.00044000  |
| 202.055.078.125.000 | 0.97064 | 0.95843 | 10.123  | 10.001  | -0.0083800 | -0.00026400 | 20206 | 10.056  | 10.121 | 0.99910 | 10.057  | 0.00045400  | -0.00071200 |
| 202.070.332.031.250 | 0.95747 | 0.95796 | 0.99948 | 0.99997 | -0.0086100 | 2,65E-01    | 20207 | 10.026  | 10.118 | 0.99599 | 10.052  | -0.00090100 | -7,74E-01   |
| 202.086.679.687.500 | 0.94342 | 0.95746 | 0.98576 | 0.99981 | -0.0083000 | 0.00031800  | 20209 | 10.027  | 10.115 | 0.99593 | 10.047  | 0.00020900  | 0.00035600  |
| 202.103.027.343.750 | 0.93033 | 0.95697 | 0.97301 | 0.99965 | -0.0075700 | 0.00056600  | 20210 | 10.033  | 10.112 | 0.99633 | 10.042  | 0.00026300  | 0.00029000  |
| 202.119.375.000.000 | 0.91865 | 0.95649 | 0.96166 | 0.99950 | -0.0064500 | 0.00083400  | 20212 | 10.036  | 10.109 | 0.99644 | 10.037  | 0.0011600   | 0.00047800  |
| 202.135.742.187.500 | 0.90925 | 0.95601 | 0.95259 | 0.99935 | -0.0048500 | 0.0011200   | 20214 | 10.071  | 10.106 | 0.99976 | 10.033  | 0.0018300   | -0.00033100 |
| 202.151.015.625.000 | 0.90331 | 0.95556 | 0.94697 | 0.99922 | -0.0029000 | 0.0012000   | 20215 | 10.094  | 10.104 | 10.019  | 10.029  | 0.00010800  | -0.00058100 |
| 202.167.363.281.250 | 0.90007 | 0.95509 | 0.94406 | 0.99909 | -0.0010400 | 0.0011000   | 20217 | 10.074  | 10.102 | 0.99975 | 10.025  | -1,16E-01   | 9,26E-01    |
| 202.183.730.468.750 | 0.89989 | 0.95463 | 0.94422 | 0.99896 | 0.00068200 | 0.00089100  | 20218 | 10.093  | 10.100 | 10.015  | 10.021  | 0.00041100  | -2,24E-01   |
| 202.201.191.406.250 | 0.90238 | 0.95414 | 0.94706 | 0.99882 | 0.0019700  | 0.00056900  | 20220 | 10.088  | 10.098 | 10.008  | 10.017  | -8,72E-01   | 0.00030400  |
| 202.217.558.593.750 | 0.90655 | 0.95369 | 0.95157 | 0.99870 | 0.0026100  | 0.00018200  | 20222 | 10.090  | 10.096 | 10.008  | 10.014  | 0.0014400   | 0.00053200  |
| 202.233.945.312.500 | 0.91092 | 0.95324 | 0.95627 | 0.99859 | 0.0025700  | -0.00014700 | 20223 | 10.135  | 10.094 | 10.051  | 10.010  | 0.0016600   | -0.00043600 |
| 202.250.312.500.000 | 0.91496 | 0.95279 | 0.96064 | 0.99848 | 0.0021300  | -0.00033100 | 20225 | 10.144  | 10.093 | 10.058  | 10.007  | 1,11E-01    | -0.00074300 |
| 202.267.792.968.750 | 0.91811 | 0.95232 | 0.96415 | 0.99837 | 0.0014500  | -0.00035100 | 20227 | 10.136  | 10.092 | 10.047  | 10.004  | -0.00085900 | 8,12E-01    |
| 202.284.160.156.250 | 0.91985 | 0.95189 | 0.96623 | 0.99826 | 0.00093600 | -0.00023700 | 20228 | 10.115  | 10.091 | 10.025  | 10.001  | 0.00028600  | 0.00051000  |
| 202.300.546.875.000 | 0.92118 | 0.95146 | 0.96788 | 0.99817 | 0.00067000 | -9,44E-01   | 20230 | 10.145  | 10.090 | 10.053  | 0.99983 | 0.00081300  | 6,59E-01    |
| 202.318.027.343.750 | 0.92212 | 0.95101 | 0.96919 | 0.99807 | 0.00061600 | 6,70E-01    | 20232 | 10.143  | 10.090 | 10.049  | 0.99956 | 0.00050900  | -0.00017800 |
| 202.335.507.812.500 | 0.92333 | 0.95056 | 0.97075 | 0.99798 | 0.00090500 | 0.00022800  | 20234 | 10.163  | 10.089 | 10.066  | 0.99931 | 0.00019100  | -0.00028700 |
| 202.351.914.062.500 | 0.92519 | 0.95014 | 0.97294 | 0.99789 | 0.0013900  | 0.00028800  | 20235 | 10.149  | 10.089 | 10.051  | 0.99908 | -0.00046300 | -0.00014100 |
| 202.369.394.531.250 | 0.92804 | 0.94971 | 0.97614 | 0.99781 | 0.0018800  | 0.00026200  | 20237 | 10.147  | 10.089 | 10.046  | 0.99886 | -0.00028800 | 0.00028600  |

|                     |         |         |         |         |             |             |       |        |        |         |         |             |             |
|---------------------|---------|---------|---------|---------|-------------|-------------|-------|--------|--------|---------|---------|-------------|-------------|
| 202.386.894.531.250 | 0.93177 | 0.94927 | 0.98023 | 0.99773 | 0.0023000   | 0.00023800  | 20239 | 10.139 | 10.089 | 10.037  | 0.99865 | 0.00053900  | 0.00011000  |
| 202.404.375.000.000 | 0.93610 | 0.94884 | 0.98491 | 0.99765 | 0.0027100   | 0.00022500  | 20240 | 10.166 | 10.090 | 10.061  | 0.99846 | 9,79E-01    | -0.00033100 |
| 202.420.781.250.000 | 0.94097 | 0.94845 | 0.99011 | 0.99759 | 0.0030700   | 0.00014300  | 20242 | 10.143 | 10.090 | 10.035  | 0.99830 | -0.00058200 | 0.00028100  |
| 202.438.281.250.000 | 0.94650 | 0.94803 | 0.99600 | 0.99752 | 0.0032000   | 6,85E-01    | 20244 | 10.146 | 10.091 | 10.037  | 0.99813 | 0.00105000  | 0.00021600  |
| 202.455.800.781.250 | 0.95217 | 0.94761 | 10.020  | 0.99746 | 0.0033100   | -1,04E-03   | 20246 | 10.179 | 10.092 | 10.068  | 0.99799 | 0.00017400  | -0.00027900 |
| 202.473.300.781.250 | 0.95809 | 0.94720 | 10.083  | 0.99740 | 0.0032000   | -0.00012600 | 20247 | 10.152 | 10.092 | 10.038  | 0.99785 | 7,28E-01    | 4,13E-01    |
| 202.491.894.531.250 | 0.96372 | 0.94677 | 10.143  | 0.99734 | 0.0028500   | -0.00021800 | 20249 | 10.182 | 10.094 | 10.066  | 0.99772 | 0.00032300  | -7,69E-01   |
| 202.509.414.062.500 | 0.96839 | 0.94636 | 10.193  | 0.99729 | 0.0024100   | -0.00030200 | 20251 | 10.164 | 10.095 | 10.045  | 0.99761 | -0.00020500 | 2,25E-01    |
| 202.526.933.593.750 | 0.97217 | 0.94597 | 10.235  | 0.99725 | 0.0017900   | -0.00034800 | 20253 | 10.175 | 10.096 | 10.054  | 0.99752 | 0.00040200  | -6,78E-01   |
| 202.544.453.125.000 | 0.97468 | 0.94557 | 10.263  | 0.99721 | 0.0011900   | -0.00031300 | 20254 | 10.178 | 10.098 | 10.054  | 0.99743 | -0.00044200 | -0.00031600 |
| 202.563.066.406.250 | 0.97648 | 0.94515 | 10.285  | 0.99716 | 0.00066300  | -0.00027600 | 20256 | 10.159 | 10.100 | 10.033  | 0.99736 | -0.00073900 | 0.00015700  |
| 202.580.585.937.500 | 0.97707 | 0.94477 | 10.294  | 0.99713 | 0.00019700  | -0.00017300 | 20258 | 10.151 | 10.102 | 10.023  | 0.99729 | 0.00012600  | 0.00044100  |
| 202.599.218.750.000 | 0.97720 | 0.94436 | 10.299  | 0.99709 | 3,80E-01    | -4,86E-01   | 20260 | 10.163 | 10.104 | 10.032  | 0.99724 | 0.00085400  | 5,22E-01    |
| 202.616.757.812.500 | 0.97721 | 0.94398 | 10.303  | 0.99707 | 2,12E-01    | 3,59E-02    | 20262 | 10.182 | 10.106 | 10.048  | 0.99720 | 0.00031500  | -0.00033200 |
| 202.635.390.625.000 | 0.97727 | 0.94358 | 10.307  | 0.99704 | 5,10E-01    | 1,30E-01    | 20264 | 10.175 | 10.108 | 10.038  | 0.99717 | -0.00034800 | 8,64E-01    |
| 202.652.910.156.250 | 0.97739 | 0.94321 | 10.312  | 0.99702 | 6,82E-01    | -4,33E-01   | 20265 | 10.170 | 10.111 | 10.031  | 0.99715 | 0.00062700  | -4,99E-01   |
| 202.671.562.500.000 | 0.97752 | 0.94281 | 10.317  | 0.99700 | -0.00010600 | -0.00016500 | 20267 | 10.197 | 10.113 | 10.056  | 0.99714 | -0.00052800 | -0.00039300 |
| 202.690.195.312.500 | 0.97700 | 0.94242 | 10.316  | 0.99698 | -0.00054800 | -0.00024700 | 20269 | 10.150 | 10.116 | 10.005  | 0.99714 | -0.00084000 | 0.00026300  |
| 202.708.847.656.250 | 0.97548 | 0.94204 | 10.304  | 0.99697 | -0.0010300  | -0.00023200 | 20271 | 10.166 | 10.119 | 10.019  | 0.99715 | 0.00045200  | 0.00033000  |
| 202.727.500.000.000 | 0.97317 | 0.94166 | 10.285  | 0.99696 | -0.0014100  | -0.00020000 | 20273 | 10.167 | 10.122 | 10.017  | 0.99716 | 0.00039200  | 1,88E-01    |
| 202.746.152.343.750 | 0.97021 | 0.94128 | 10.259  | 0.99695 | -0.0017700  | -0.00019000 | 20275 | 10.181 | 10.125 | 10.028  | 0.99719 | 0.00052200  | -0.00013200 |
| 202.764.804.687.500 | 0.96656 | 0.94090 | 10.226  | 0.99694 | -0.0021200  | -0.00019000 | 20276 | 10.186 | 10.128 | 10.030  | 0.99722 | -1,00E+00   | -0.00040500 |
| 202.783.457.031.250 | 0.96229 | 0.94053 | 10.187  | 0.99694 | -0.0024800  | -0.00021100 | 20278 | 10.177 | 10.131 | 10.018  | 0.99726 | -0.00099100 | -0.00013100 |
| 202.802.109.375.000 | 0.95730 | 0.94015 | 10.141  | 0.99694 | -0.0029100  | -0.00022000 | 20280 | 10.149 | 10.135 | 0.99876 | 0.99730 | -0.00059100 | 0.00062300  |
| 202.820.781.250.000 | 0.95144 | 0.93979 | 10.086  | 0.99694 | -0.0033000  | -0.00018400 | 20282 | 10.155 | 10.138 | 0.99904 | 0.99735 | 0.0013300   | 0.00028100  |
| 202.839.453.125.000 | 0.94496 | 0.93942 | 10.025  | 0.99695 | -0.0036000  | -0.00010700 | 20284 | 10.199 | 10.142 | 10.031  | 0.99741 | 0.00045700  | -0.00043400 |
| 202.859.218.750.000 | 0.93762 | 0.93903 | 0.99554 | 0.99696 | -0.0037100  | 2,01E-01    | 20286 | 10.173 | 10.145 | 10.002  | 0.99747 | -0.00033400 | 6,01E-01    |
| 202.877.910.156.250 | 0.93068 | 0.93867 | 0.98897 | 0.99696 | -0.0035200  | 0.00018700  | 20288 | 10.186 | 10.149 | 10.012  | 0.99754 | 0.00068900  | -5,85E-02   |
| 202.896.582.031.250 | 0.92448 | 0.93831 | 0.98314 | 0.99698 | -0.0030200  | 0.00025400  | 20290 | 10.198 | 10.153 | 10.022  | 0.99761 | -0.00035600 | -0.00021500 |
| 202.916.367.187.500 | 0.91908 | 0.93794 | 0.97814 | 0.99699 | -0.0025400  | 0.00018900  | 20292 | 10.172 | 10.157 | 0.99925 | 0.99769 | -0.00013900 | 0.00020500  |
| 202.936.152.343.750 | 0.91442 | 0.93756 | 0.97386 | 0.99700 | -0.0022700  | 0.00011800  | 20294 | 10.193 | 10.161 | 10.010  | 0.99777 | 0.00045700  | 7,78E-01    |
| 202.954.843.750.000 | 0.91036 | 0.93721 | 0.97017 | 0.99702 | -0.0020900  | 8,30E-01    | 20295 | 10.190 | 10.165 | 10.004  | 0.99785 | 0.00016000  | 8,83E-01    |
| 202.974.628.906.250 | 0.90638 | 0.93683 | 0.96658 | 0.99704 | -0.0019500  | 8,20E-01    | 20297 | 10.199 | 10.169 | 10.009  | 0.99793 | 0.00079700  | 7,36E-01    |
| 202.994.433.593.750 | 0.90264 | 0.93646 | 0.96324 | 0.99706 | -0.0017600  | 0.00012700  | 20299 | 10.222 | 10.173 | 10.029  | 0.99802 | 0.00045200  | -0.00033800 |
| 203.013.125.000.000 | 0.89959 | 0.93611 | 0.96055 | 0.99708 | -0.0014600  | 0.00021600  | 20301 | 10.216 | 10.177 | 10.020  | 0.99810 | -0.00050600 | -0.00026400 |

|                     |         |         |         |         |             |             |       |        |        |         |         |             |             |
|---------------------|---------|---------|---------|---------|-------------|-------------|-------|--------|--------|---------|---------|-------------|-------------|
| 203.032.929.687.500 | 0.89702 | 0.93575 | 0.95837 | 0.99710 | -0.00093200 | 0.00034600  | 20303 | 10.202 | 10.182 | 10.002  | 0.99819 | -0.00056500 | 0.00022800  |
| 203.052.753.906.250 | 0.89590 | 0.93538 | 0.95764 | 0.99712 | -9,20E-01   | 0.00045100  | 20305 | 10.194 | 10.186 | 0.99909 | 0.99828 | 0.00039800  | 0.00028600  |
| 203.072.558.593.750 | 0.89665 | 0.93501 | 0.95879 | 0.99715 | 0.00085600  | 0.00043900  | 20307 | 10.218 | 10.190 | 10.011  | 0.99836 | 0.00057000  | -0.00026100 |
| 203.092.382.812.500 | 0.89929 | 0.93465 | 0.96181 | 0.99717 | 0.0016500   | 0.00034200  | 20309 | 10.217 | 10.195 | 10.006  | 0.99845 | -0.00063600 | -0.00018800 |
| 203.112.207.031.250 | 0.90319 | 0.93428 | 0.96610 | 0.99720 | 0.0022100   | 0.00019700  | 20311 | 10.193 | 10.199 | 0.99791 | 0.99853 | -0.00017400 | 0.00025800  |
| 203.132.031.250.000 | 0.90805 | 0.93392 | 0.97136 | 0.99722 | 0.0024300   | 5,76E-01    | 20313 | 10.210 | 10.203 | 0.99925 | 0.99861 | 0.00038700  | 1,87E-01    |
| 203.152.949.218.750 | 0.91309 | 0.93354 | 0.97681 | 0.99725 | 0.0024500   | -8,10E-02   | 20315 | 10.208 | 10.208 | 0.99875 | 0.99869 | -9,75E-01   | -9,80E-01   |
| 203.172.792.968.750 | 0.91802 | 0.93317 | 0.98213 | 0.99727 | 0.0024000   | -4,28E-01   | 20317 | 10.206 | 10.212 | 0.99811 | 0.99876 | -1,28E-01   | 1,80E-01    |
| 203.192.617.187.500 | 0.92261 | 0.93281 | 0.98709 | 0.99730 | 0.0022800   | -3,72E-01   | 20319 | 10.208 | 10.217 | 0.99797 | 0.99883 | -2,63E-01   | 6,36E-01    |
| 203.213.574.218.750 | 0.92731 | 0.93243 | 0.99221 | 0.99733 | 0.0022500   | -3,09E-01   | 20321 | 10.205 | 10.221 | 0.99725 | 0.99889 | 0.00024600  | 0.00014000  |
| 203.233.417.968.750 | 0.93177 | 0.93207 | 0.99706 | 0.99735 | 0.0021500   | -8,01E-01   | 20323 | 10.218 | 10.225 | 0.99822 | 0.99895 | 0.00054600  | -0.00015600 |
| 203.253.261.718.750 | 0.93584 | 0.93170 | 10.015  | 0.99738 | 0.0019300   | -0.00010600 | 20325 | 10.226 | 10.230 | 0.99867 | 0.99900 | -0.00037100 | -0.00021900 |
| 203.274.218.750.000 | 0.93964 | 0.93132 | 10.057  | 0.99740 | 0.0017200   | -0.00010100 | 20327 | 10.203 | 10.234 | 0.99593 | 0.99905 | -0.00034900 | 0.00022900  |
| 203.295.175.781.250 | 0.94304 | 0.93094 | 10.095  | 0.99743 | 0.0015000   | -0.00010800 | 20330 | 10.212 | 10.238 | 0.99641 | 0.99909 | 0.00058700  | 2,64E-01    |
| 203.315.039.062.500 | 0.94578 | 0.93057 | 10.127  | 0.99745 | 0.0012800   | -0.00011600 | 20332 | 10.227 | 10.243 | 0.99755 | 0.99912 | -0.00024100 | -0.00018900 |
| 203.336.015.625.000 | 0.94825 | 0.93019 | 10.155  | 0.99748 | 0.0010300   | -0.00013800 | 20334 | 10.202 | 10.247 | 0.99464 | 0.99915 | -0.00018600 | 0.00024800  |
| 203.356.972.656.250 | 0.95010 | 0.92981 | 10.178  | 0.99750 | 0.00070000  | -0.00014600 | 20336 | 10.219 | 10.251 | 0.99595 | 0.99918 | 0.00080100  | 0.00012900  |
| 203.377.949.218.750 | 0.95118 | 0.92943 | 10.193  | 0.99753 | 0.00041800  | -0.00011100 | 20338 | 10.235 | 10.256 | 0.99717 | 0.99920 | 0.00035600  | -0.00011900 |
| 203.398.945.312.500 | 0.95185 | 0.92904 | 10.204  | 0.99755 | 0.00023500  | -0.00010500 | 20340 | 10.234 | 10.260 | 0.99661 | 0.99921 | 0.00029900  | -0.00022600 |
| 203.419.921.875.000 | 0.95217 | 0.92866 | 10.211  | 0.99757 | -2,33E-01   | -0.00014800 | 20342 | 10.248 | 10.264 | 0.99759 | 0.99922 | -0.00059300 | -3,77E-01   |
| 203.440.917.968.750 | 0.95175 | 0.92828 | 10.211  | 0.99760 | -0.00038600 | -0.00017100 | 20344 | 10.209 | 10.269 | 0.99328 | 0.99922 | 0.00014100  | 0.00029600  |
| 203.461.914.062.500 | 0.95055 | 0.92789 | 10.203  | 0.99762 | -0.00074100 | -0.00014800 | 20346 | 10.254 | 10.273 | 0.99734 | 0.99922 | 0.00065200  | -0.00025500 |
| 203.482.910.156.250 | 0.94864 | 0.92751 | 10.188  | 0.99765 | -0.0010100  | -0.00010300 | 20348 | 10.236 | 10.277 | 0.99516 | 0.99922 | -0.00092800 | -0.00018200 |
| 203.503.906.250.000 | 0.94632 | 0.92713 | 10.169  | 0.99767 | -0.0011700  | -7,27E-01   | 20350 | 10.215 | 10.281 | 0.99258 | 0.99921 | -0.00011100 | 0.00026700  |
| 203.524.921.875.000 | 0.94371 | 0.92675 | 10.147  | 0.99769 | -0.0013100  | -7,97E-02   | 20352 | 10.232 | 10.285 | 0.99382 | 0.99919 | 0.00019200  | 0.00013400  |
| 203.547.050.781.250 | 0.94066 | 0.92634 | 10.120  | 0.99771 | -0.0012100  | 0.00010400  | 20355 | 10.223 | 10.290 | 0.99251 | 0.99918 | 0.00046700  | 0.00022700  |
| 203.568.066.406.250 | 0.93850 | 0.92596 | 10.103  | 0.99774 | -0.00086600 | 0.00013800  | 20357 | 10.252 | 10.294 | 0.99493 | 0.99915 | 0.0011700   | -0.00025000 |
| 203.589.082.031.250 | 0.93702 | 0.92558 | 10.092  | 0.99776 | -0.00062600 | 8,92E-01    | 20359 | 10.273 | 10.298 | 0.99655 | 0.99913 | -0.00058200 | -0.00036300 |
| 203.611.210.937.500 | 0.93580 | 0.92518 | 10.084  | 0.99778 | -0.00048100 | 4,23E-01    | 20361 | 10.227 | 10.303 | 0.99150 | 0.99910 | -0.00039200 | 0.00034900  |
| 203.633.359.375.000 | 0.93489 | 0.92477 | 10.079  | 0.99780 | -0.00043900 | -3,37E-01   | 20363 | 10.255 | 10.307 | 0.99386 | 0.99906 | 0.00096400  | 0.00020200  |
| 203.654.394.531.250 | 0.93391 | 0.92439 | 10.073  | 0.99783 | -0.00062700 | -0.00013000 | 20365 | 10.268 | 10.311 | 0.99473 | 0.99903 | 0.00048100  | -0.00016800 |
| 203.676.523.437.500 | 0.93218 | 0.92399 | 10.060  | 0.99785 | -0.0010000  | -0.00019300 | 20368 | 10.276 | 10.316 | 0.99500 | 0.99898 | 0.00023900  | -0.00013900 |
| 203.698.691.406.250 | 0.92948 | 0.92359 | 10.038  | 0.99787 | -0.0014800  | -0.00019800 | 20370 | 10.279 | 10.320 | 0.99482 | 0.99894 | -0.00013700 | -3,97E-01   |
| 203.719.726.562.500 | 0.92578 | 0.92321 | 10.005  | 0.99789 | -0.0018500  | -0.00012500 | 20372 | 10.270 | 10.324 | 0.99345 | 0.99889 | 6,79E-01    | 0.00023200  |
| 203.741.894.531.250 | 0.92146 | 0.92280 | 0.99657 | 0.99791 | -0.0020200  | -2,15E-01   | 20374 | 10.282 | 10.329 | 0.99415 | 0.99884 | 0.00086600  | 6,40E-01    |

|                     |         |         |         |         |             |             |       |        |        |         |         |             |             |
|---------------------|---------|---------|---------|---------|-------------|-------------|-------|--------|--------|---------|---------|-------------|-------------|
| 203.764.062.500.000 | 0.91682 | 0.92240 | 0.99235 | 0.99794 | -0.0019500  | 0.00011700  | 20376 | 10.308 | 10.333 | 0.99630 | 0.99879 | 0.00035200  | -0.00014100 |
| 203.786.230.468.750 | 0.91281 | 0.92200 | 0.98877 | 0.99796 | -0.0015100  | 0.00023100  | 20379 | 10.298 | 10.338 | 0.99471 | 0.99873 | 0.00024100  | 8,99E-01    |
| 203.808.417.968.750 | 0.91014 | 0.92160 | 0.98652 | 0.99798 | -0.00092500 | 0.00024500  | 20381 | 10.319 | 10.342 | 0.99636 | 0.99867 | 0.00075100  | 7,67E-01    |
| 203.830.585.937.500 | 0.90871 | 0.92120 | 0.98551 | 0.99800 | -0.00042000 | 0.00019500  | 20383 | 10.331 | 10.347 | 0.99703 | 0.99861 | 0.00058100  | -3,65E-01   |
| 203.852.773.437.500 | 0.90828 | 0.92080 | 0.98550 | 0.99802 | -5,97E-01   | 0.00010900  | 20385 | 10.345 | 10.351 | 0.99791 | 0.99854 | 0.00058900  | -8,00E-01   |
| 203.874.960.937.500 | 0.90845 | 0.92040 | 0.98609 | 0.99804 | 6,56E-01    | 1,68E-01    | 20387 | 10.357 | 10.356 | 0.99861 | 0.99847 | 0.00022600  | -0.00019100 |
| 203.898.281.250.000 | 0.90857 | 0.91998 | 0.98666 | 0.99806 | 1,70E-01    | -3,08E-01   | 20390 | 10.355 | 10.360 | 0.99788 | 0.99840 | -0.00028200 | -0.00012100 |
| 203.920.468.750.000 | 0.90852 | 0.91958 | 0.98703 | 0.99808 | -7,47E-01   | -5,57E-01   | 20392 | 10.344 | 10.365 | 0.99626 | 0.99833 | -0.00032500 | 0.00020700  |
| 203.942.675.781.250 | 0.90824 | 0.91918 | 0.98717 | 0.99811 | -0.00023000 | -6,19E-01   | 20394 | 10.341 | 10.369 | 0.99538 | 0.99826 | 0.00063500  | 0.00034000  |
| 203.965.996.093.750 | 0.90748 | 0.91876 | 0.98684 | 0.99813 | -0.00035600 | -4,62E-01   | 20397 | 10.373 | 10.374 | 0.99807 | 0.99818 | 0.00122000  | -9,15E-02   |
| 203.988.222.656.250 | 0.90662 | 0.91836 | 0.98641 | 0.99815 | -0.00044100 | -2,01E-01   | 20399 | 10.396 | 10.379 | 0.99987 | 0.99811 | 0.00059300  | -0.00025400 |
| 204.011.542.968.750 | 0.90547 | 0.91794 | 0.98570 | 0.99817 | -0.00044800 | 4,58E-01    | 20401 | 10.400 | 10.384 | 0.99967 | 0.99803 | 6,94E-01    | -0.00010300 |
| 204.033.769.531.250 | 0.90458 | 0.91754 | 0.98523 | 0.99819 | -0.00023200 | 0.00013800  | 20403 | 10.400 | 10.388 | 0.99908 | 0.99795 | 0.00012600  | 1,11E-01    |
| 204.057.109.375.000 | 0.90441 | 0.91712 | 0.98550 | 0.99821 | 0.00018100  | 0.00018400  | 20406 | 10.406 | 10.393 | 0.99913 | 0.99787 | 0.00012000  | -1,78E-01   |
| 204.080.468.750.000 | 0.90542 | 0.91670 | 0.98695 | 0.99823 | 0.00062600  | 0.00015400  | 20408 | 10.405 | 10.398 | 0.99849 | 0.99779 | 4,29E-01    | 0.00016500  |
| 204.102.714.843.750 | 0.90727 | 0.91631 | 0.98921 | 0.99825 | 0.00088400  | 6,41E-01    | 20410 | 10.408 | 10.403 | 0.99819 | 0.99771 | 0.00087100  | 8,30E-01    |
| 204.126.074.218.750 | 0.90945 | 0.91589 | 0.99184 | 0.99827 | 0.00091800  | -1,65E-01   | 20413 | 10.445 | 10.408 | 10.013  | 0.99763 | 0.00042200  | -0.00018700 |
| 204.149.433.593.750 | 0.91156 | 0.91547 | 0.99438 | 0.99830 | 0.00080700  | -7,91E-01   | 20415 | 10.428 | 10.413 | 0.99898 | 0.99755 | -1,06E-02   | 5,98E-01    |
| 204.172.792.968.750 | 0.91322 | 0.91505 | 0.99648 | 0.99832 | 0.00054900  | -0.00012100 | 20417 | 10.445 | 10.418 | 10.001  | 0.99746 | 0.00070100  | 0.00013500  |
| 204.196.171.875.000 | 0.91412 | 0.91464 | 0.99782 | 0.99834 | 0.00024100  | -0.00012100 | 20420 | 10.460 | 10.423 | 10.011  | 0.99738 | 0.00063000  | -0.00012900 |
| 204.219.550.781.250 | 0.91435 | 0.91422 | 0.99849 | 0.99836 | -1,54E-01   | -0.00010200 | 20422 | 10.474 | 10.429 | 10.019  | 0.99730 | 9,95E-01    | -0.00020400 |
| 204.242.929.687.500 | 0.91405 | 0.91381 | 0.99862 | 0.99838 | -0.00023800 | -8,97E-01   | 20424 | 10.465 | 10.434 | 10.003  | 0.99722 | -0.00032400 | -1,42E-01   |
| 204.266.328.125.000 | 0.91323 | 0.91339 | 0.99825 | 0.99840 | -0.00043500 | -4,50E-01   | 20427 | 10.459 | 10.439 | 0.99915 | 0.99714 | 3,32E-01    | 8,14E-01    |
| 204.290.839.843.750 | 0.91196 | 0.91296 | 0.99743 | 0.99843 | -0.00045400 | 1,76E-01    | 20429 | 10.467 | 10.445 | 0.99923 | 0.99706 | 6,64E-01    | 0.00010600  |
| 204.314.238.281.250 | 0.91106 | 0.91254 | 0.99696 | 0.99845 | -0.00035100 | 4,31E-01    | 20431 | 10.462 | 10.450 | 0.99821 | 0.99699 | 0.00054200  | 0.00018600  |
| 204.337.656.250.000 | 0.91032 | 0.91213 | 0.99666 | 0.99847 | -0.00025200 | 5,69E-01    | 20434 | 10.492 | 10.456 | 10.005  | 0.99691 | 0.00093800  | -8,20E-01   |
| 204.362.187.500.000 | 0.90985 | 0.91169 | 0.99664 | 0.99849 | -7,77E-01   | 9,43E-01    | 20436 | 10.507 | 10.462 | 10.014  | 0.99684 | 0.00014900  | -0.00020800 |
| 204.385.605.468.750 | 0.90995 | 0.91128 | 0.99718 | 0.99851 | 0.00020000  | 0.00012000  | 20439 | 10.499 | 10.467 | 0.99996 | 0.99677 | -5,92E-01   | 4,28E-01    |
| 204.409.023.437.500 | 0.91078 | 0.91087 | 0.99845 | 0.99853 | 0.00048600  | 0.00010700  | 20441 | 10.505 | 10.473 | 0.99988 | 0.99670 | 0.00034900  | -9,87E-01   |
| 204.433.574.218.750 | 0.91228 | 0.91044 | 10.004  | 0.99856 | 0.00071200  | 8,33E-01    | 20443 | 10.516 | 10.479 | 10.003  | 0.99663 | -0.00053300 | 5,87E-02    |
| 204.458.125.000.000 | 0.91428 | 0.91000 | 10.029  | 0.99858 | 0.00089500  | 4,39E-01    | 20446 | 10.478 | 10.485 | 0.99592 | 0.99657 | 0.00037800  | 0.00033500  |
| 204.481.562.500.000 | 0.91657 | 0.90959 | 10.056  | 0.99860 | 0.00092300  | -2,95E-01   | 20448 | 10.534 | 10.491 | 10.008  | 0.99651 | 0.00108000  | -0.00016300 |
| 204.506.113.281.250 | 0.91871 | 0.90916 | 10.082  | 0.99863 | 0.00075300  | -9,52E-01   | 20451 | 10.530 | 10.497 | 0.99976 | 0.99645 | -0.00040500 | -0.00025400 |
| 204.530.683.593.750 | 0.92027 | 0.90873 | 10.102  | 0.99865 | 0.00045600  | -0.00014400 | 20453 | 10.514 | 10.503 | 0.99747 | 0.99639 | -0.00017000 | 0.00012900  |
| 204.555.273.437.500 | 0.92095 | 0.90830 | 10.113  | 0.99867 | 4,78E-01    | -0.00016900 | 20456 | 10.522 | 10.510 | 0.99755 | 0.99634 | 0.00022700  | 0.00017500  |

|                     |         |         |         |         |             |             |       |        |        |         |         |             |             |
|---------------------|---------|---------|---------|---------|-------------|-------------|-------|--------|--------|---------|---------|-------------|-------------|
| 204.579.843.750.000 | 0.92051 | 0.90787 | 10.113  | 0.99870 | -0.00037600 | -0.00014200 | 20458 | 10.525 | 10.516 | 0.99719 | 0.99629 | 0.00068900  | -5,17E-01   |
| 204.604.433.593.750 | 0.91911 | 0.90745 | 10.104  | 0.99872 | -0.00065000 | -6,54E-01   | 20460 | 10.556 | 10.523 | 0.99953 | 0.99625 | -2,73E-01   | -0.00011400 |
| 204.629.023.437.500 | 0.91731 | 0.90702 | 10.090  | 0.99875 | -0.00069700 | 8,06E-02    | 20463 | 10.524 | 10.529 | 0.99565 | 0.99621 | 0.00012700  | 0.00013800  |
| 204.653.632.812.500 | 0.91568 | 0.90659 | 10.079  | 0.99877 | -0.00061100 | 4,42E-01    | 20465 | 10.562 | 10.536 | 0.99875 | 0.99618 | 0.00065300  | -6,73E-01   |
| 204.678.222.656.250 | 0.91430 | 0.90617 | 10.069  | 0.99880 | -0.00048000 | 1,90E-01    | 20468 | 10.556 | 10.543 | 0.99744 | 0.99615 | -0.00020400 | -0.00016200 |
| 204.702.832.031.250 | 0.91332 | 0.90574 | 10.064  | 0.99882 | -0.00051700 | -4,71E-01   | 20470 | 10.552 | 10.550 | 0.99631 | 0.99612 | -0.00014500 | 6,98E-01    |
| 204.727.460.937.500 | 0.91176 | 0.90532 | 10.053  | 0.99885 | -0.00071200 | -8,77E-01   | 20473 | 10.549 | 10.557 | 0.99529 | 0.99610 | 0.00014000  | 0.00010800  |
| 204.752.089.843.750 | 0.90981 | 0.90489 | 10.038  | 0.99887 | -0.00094900 | -8,32E-01   | 20475 | 10.559 | 10.564 | 0.99555 | 0.99608 | 0.00039000  | -1,46E-01   |
| 204.777.832.031.250 | 0.90698 | 0.90445 | 10.014  | 0.99890 | -0.0011300  | -4,50E-01   | 20478 | 10.568 | 10.572 | 0.99576 | 0.99606 | 6,65E-01    | -3,49E-01   |
| 204.802.460.937.500 | 0.90412 | 0.90403 | 0.99902 | 0.99893 | -0.0011800  | 5,74E-02    | 20480 | 10.562 | 10.579 | 0.99438 | 0.99605 | 0.00021400  | 3,01E-01    |
| 204.828.222.656.250 | 0.90105 | 0.90358 | 0.99642 | 0.99895 | -0.0011000  | 6,68E-01    | 20483 | 10.579 | 10.586 | 0.99532 | 0.99604 | 0.00021800  | -3,14E-01   |
| 204.852.871.093.750 | 0.89856 | 0.90316 | 0.99438 | 0.99898 | -0.00083900 | 0.00011400  | 20485 | 10.573 | 10.594 | 0.99396 | 0.99604 | 5,58E-01    | 0.00015700  |
| 204.878.652.343.750 | 0.89682 | 0.90272 | 0.99310 | 0.99901 | -0.00052800 | 0.00011700  | 20488 | 10.582 | 10.602 | 0.99407 | 0.99604 | 0.0010100   | 0.00012800  |
| 204.903.300.781.250 | 0.89590 | 0.90230 | 0.99263 | 0.99904 | -0.00025000 | 9,36E-01    | 20490 | 10.624 | 10.609 | 0.99751 | 0.99604 | 0.00070300  | -0.00030100 |
| 204.929.101.562.500 | 0.89556 | 0.90187 | 0.99276 | 0.99907 | -5,58E-01   | 6,12E-01    | 20493 | 10.618 | 10.617 | 0.99607 | 0.99605 | -0.00050900 | -0.00020800 |
| 204.954.882.812.500 | 0.89561 | 0.90143 | 0.99328 | 0.99910 | 6,58E-01    | 4,33E-01    | 20495 | 10.598 | 10.625 | 0.99330 | 0.99606 | -0.00036800 | 0.00014500  |
| 204.979.570.312.500 | 0.89589 | 0.90101 | 0.99400 | 0.99912 | 0.00016300  | 1,91E-01    | 20498 | 10.599 | 10.633 | 0.99265 | 0.99607 | 0.00022400  | 0.00018000  |
| 205.005.371.093.750 | 0.89643 | 0.90057 | 0.99501 | 0.99915 | 0.00016200  | -1,50E-01   | 20501 | 10.609 | 10.641 | 0.99285 | 0.99609 | 0.00053900  | 6,25E-01    |
| 205.031.191.406.250 | 0.89673 | 0.90014 | 0.99577 | 0.99919 | 8,55E-01    | -2,28E-01   | 20503 | 10.627 | 10.650 | 0.99381 | 0.99611 | 0.00054700  | -4,10E-01   |
| 205.057.011.718.750 | 0.89688 | 0.89971 | 0.99639 | 0.99922 | 4,44E-01    | -1,62E-01   | 20506 | 10.637 | 10.658 | 0.99404 | 0.99613 | 0.00032800  | 2,62E-02    |
| 205.082.832.031.250 | 0.89696 | 0.89927 | 0.99693 | 0.99925 | 1,60E-02    | -2,20E-01   | 20508 | 10.644 | 10.667 | 0.99386 | 0.99615 | 0.00056000  | 6,78E-01    |
| 205.108.671.875.000 | 0.89688 | 0.89884 | 0.99732 | 0.99928 | -6,93E-01   | -4,11E-01   | 20511 | 10.666 | 10.675 | 0.99528 | 0.99618 | 0.00067800  | -6,28E-01   |
| 205.134.511.718.750 | 0.89660 | 0.89841 | 0.99750 | 0.99931 | -0.00021100 | -5,06E-01   | 20513 | 10.679 | 10.684 | 0.99570 | 0.99622 | 0.00023600  | -0.00016400 |
| 205.161.464.843.750 | 0.89577 | 0.89796 | 0.99716 | 0.99935 | -0.00033600 | -2,88E-01   | 20516 | 10.679 | 10.693 | 0.99482 | 0.99625 | -0.00018700 | -5,69E-02   |
| 205.187.324.218.750 | 0.89482 | 0.89753 | 0.99667 | 0.99938 | -0.00036300 | -8,13E-02   | 20519 | 10.669 | 10.702 | 0.99299 | 0.99629 | 0.00020600  | 0.00022100  |
| 205.213.183.593.750 | 0.89389 | 0.89710 | 0.99620 | 0.99941 | -0.00037800 | -4,98E-02   | 20521 | 10.689 | 10.711 | 0.99419 | 0.99633 | 0.00095500  | 6,20E-01    |
| 205.239.042.968.750 | 0.89286 | 0.89667 | 0.99564 | 0.99945 | -0.00038900 | 2,45E-02    | 20524 | 10.718 | 10.720 | 0.99623 | 0.99637 | 0.00052600  | -0.00012800 |
| 205.266.054.687.500 | 0.89184 | 0.89622 | 0.99509 | 0.99948 | -0.00036500 | 1,29E-01    | 20527 | 10.717 | 10.729 | 0.99522 | 0.99642 | 0.00027900  | -3,94E-01   |
| 205.291.933.593.750 | 0.89093 | 0.89580 | 0.99465 | 0.99951 | -0.00032100 | 3,21E-01    | 20529 | 10.733 | 10.738 | 0.99594 | 0.99646 | 0.00031800  | -0.00010500 |
| 205.318.945.312.500 | 0.89014 | 0.89535 | 0.99434 | 0.99955 | -0.00019600 | 4,89E-01    | 20532 | 10.734 | 10.748 | 0.99513 | 0.99652 | -0.00027400 | 1,18E-02    |
| 205.344.843.750.000 | 0.88990 | 0.89493 | 0.99456 | 0.99958 | -6,20E-01   | 4,52E-01    | 20534 | 10.719 | 10.757 | 0.99271 | 0.99657 | 0.00032400  | 0.00024200  |
| 205.371.855.468.750 | 0.88981 | 0.89448 | 0.99495 | 0.99962 | 4,35E-01    | 4,80E-01    | 20537 | 10.751 | 10.767 | 0.99505 | 0.99662 | 0.0010000   | 6,16E-01    |
| 205.398.886.718.750 | 0.89013 | 0.89404 | 0.99575 | 0.99966 | 0.00019800  | 6,02E-01    | 20540 | 10.773 | 10.777 | 0.99630 | 0.99668 | 0.00065700  | -0.00018000 |
| 205.424.804.687.500 | 0.89086 | 0.89361 | 0.99693 | 0.99969 | 0.00036200  | 3,59E-01    | 20542 | 10.786 | 10.786 | 0.99671 | 0.99674 | 4,93E-01    | -0.00010900 |
| 205.451.855.468.750 | 0.89205 | 0.89317 | 0.99861 | 0.99973 | 0.00038800  | -3,02E-01   | 20545 | 10.775 | 10.796 | 0.99473 | 0.99680 | 7,73E-01    | 9,81E-01    |



|                     |         |         |         |         |             |             |       |        |        |         |         |             |             |
|---------------------|---------|---------|---------|---------|-------------|-------------|-------|--------|--------|---------|---------|-------------|-------------|
| 205.478.906.250.000 | 0.89296 | 0.89273 | 0.99999 | 0.99976 | 0.00019900  | -9,29E-01   | 20548 | 10.790 | 10.806 | 0.99526 | 0.99687 | 0.00058000  | 0.00012100  |
| 205.505.976.562.500 | 0.89313 | 0.89229 | 10.006  | 0.99980 | -0.00011500 | -0.00010100 | 20551 | 10.807 | 10.816 | 0.99599 | 0.99693 | 0.00073100  | 1,06E-01    |
| 205.533.046.875.000 | 0.89233 | 0.89185 | 10.003  | 0.99984 | -0.00034800 | -5,20E-01   | 20553 | 10.830 | 10.827 | 0.99732 | 0.99700 | 0.00063800  | -2,51E-01   |
| 205.560.117.187.500 | 0.89125 | 0.89141 | 0.99971 | 0.99988 | -0.00039600 | -6,50E-02   | 20556 | 10.841 | 10.837 | 0.99753 | 0.99707 | 0.00059500  | -1,40E-01   |
| 205.587.207.031.250 | 0.89019 | 0.89097 | 0.99913 | 0.99991 | -0.00038300 | 3,02E-01    | 20559 | 10.862 | 10.847 | 0.99862 | 0.99714 | 0.00056200  | -6,21E-01   |
| 205.614.296.875.000 | 0.88917 | 0.89053 | 0.99859 | 0.99995 | -0.00023200 | 6,12E-01    | 20561 | 10.872 | 10.858 | 0.99865 | 0.99722 | 0.00025800  | -4,21E-01   |
| 205.641.386.718.750 | 0.88893 | 0.89010 | 0.99882 | 0.99999 | -5,11E-01   | 4,78E-01    | 20564 | 10.876 | 10.868 | 0.99808 | 0.99729 | 0.00033400  | -3,28E-01   |
| 205.668.496.093.750 | 0.88889 | 0.88966 | 0.99926 | 10.000  | 2,67E-01    | 2,64E-01    | 20567 | 10.890 | 10.879 | 0.99850 | 0.99736 | 8,06E-01    | 2,51E-01    |
| 205.696.738.281.250 | 0.88908 | 0.88920 | 0.99993 | 10.001  | 9,50E-01    | 3,44E-01    | 20570 | 10.880 | 10.890 | 0.99652 | 0.99744 | 0.00047300  | 0.00011000  |
| 205.723.847.656.250 | 0.88942 | 0.88877 | 10.008  | 10.001  | 0.00021700  | 5,26E-01    | 20572 | 10.916 | 10.900 | 0.99911 | 0.99752 | 0.00069400  | -5,43E-01   |
| 205.750.976.562.500 | 0.89025 | 0.88833 | 10.021  | 10.001  | 0.00038000  | 5,71E-01    | 20575 | 10.918 | 10.911 | 0.99830 | 0.99760 | 0.00017800  | -3,54E-01   |
| 205.779.238.281.250 | 0.89153 | 0.88788 | 10.038  | 10.002  | 0.00053300  | 5,93E-01    | 20578 | 10.926 | 10.922 | 0.99805 | 0.99768 | 0.00049800  | 7,41E-01    |
| 205.806.386.718.750 | 0.89321 | 0.88744 | 10.060  | 10.002  | 0.00070900  | 3,77E-01    | 20581 | 10.946 | 10.933 | 0.99901 | 0.99776 | 0.00058900  | -4,47E-01   |
| 205.834.667.968.750 | 0.89546 | 0.88699 | 10.087  | 10.003  | 0.00074200  | -1,71E-01   | 20583 | 10.959 | 10.944 | 0.99926 | 0.99784 | 0.00025000  | -2,52E-01   |
| 205.861.816.406.250 | 0.89732 | 0.88656 | 10.111  | 10.003  | 0.00061400  | -8,23E-01   | 20586 | 10.959 | 10.955 | 0.99832 | 0.99792 | 0.00044900  | 7,36E-01    |
| 205.890.117.187.500 | 0.89886 | 0.88611 | 10.131  | 10.003  | 0.00028600  | -0.00013000 | 20589 | 10.984 | 10.967 | 0.99966 | 0.99801 | 0.00065800  | -1,53E-01   |
| 205.918.417.968.750 | 0.89894 | 0.88565 | 10.136  | 10.004  | -0.00012200 | -0.00013600 | 20592 | 10.997 | 10.979 | 0.99991 | 0.99809 | 0.00036300  | -6,22E-01   |
| 205.946.738.281.250 | 0.89817 | 0.88520 | 10.134  | 10.004  | -0.00048600 | -0.00012100 | 20595 | 11.004 | 10.990 | 0.99957 | 0.99818 | 0.00030600  | 7,23E-02    |
| 205.973.925.781.250 | 0.89624 | 0.88477 | 10.119  | 10.004  | -0.00079600 | -7,29E-01   | 20597 | 11.014 | 11.001 | 0.99949 | 0.99826 | 0.00040300  | 4,28E-01    |
| 206.002.246.093.750 | 0.89375 | 0.88432 | 10.099  | 10.005  | -0.00089100 | -3,40E-01   | 20600 | 11.026 | 11.013 | 0.99967 | 0.99834 | 0.00054400  | 4,58E-01    |
| 206.030.585.937.500 | 0.89119 | 0.88387 | 10.078  | 10.005  | -0.00098900 | -3,53E-01   | 20603 | 11.045 | 11.025 | 10.004  | 0.99843 | 0.00066200  | -2,25E-02   |
| 206.058.925.781.250 | 0.88815 | 0.88342 | 10.053  | 10.006  | -0.0010900  | -2,23E-01   | 20606 | 11.064 | 11.037 | 10.012  | 0.99851 | 0.00053100  | -0.00011500 |
| 206.087.285.156.250 | 0.88501 | 0.88297 | 10.026  | 10.006  | -0.0011200  | 6,89E-02    | 20609 | 11.075 | 11.049 | 10.012  | 0.99860 | 1,02E-01    | -5,34E-01   |
| 206.115.644.531.250 | 0.88182 | 0.88252 | 0.99993 | 10.006  | -0.0010500  | 4,72E-01    | 20612 | 11.065 | 11.061 | 0.99906 | 0.99868 | 0.00022800  | 0.00014000  |
| 206.144.003.906.250 | 0.87905 | 0.88207 | 0.99764 | 10.007  | -0.00084700 | 8,42E-01    | 20614 | 11.088 | 11.073 | 10.002  | 0.99876 | 0.00080500  | 5,03E-01    |
| 206.173.515.625.000 | 0.87692 | 0.88161 | 0.99601 | 10.007  | -0.00056400 | 8,87E-01    | 20617 | 11.111 | 11.085 | 10.014  | 0.99885 | 0.00051900  | -0.00016200 |
| 206.201.894.531.250 | 0.87578 | 0.88116 | 0.99536 | 10.007  | -0.00033400 | 6,81E-01    | 20620 | 11.118 | 11.097 | 10.009  | 0.99893 | -0.00013200 | -6,29E-01   |
| 206.230.292.968.750 | 0.87502 | 0.88071 | 0.99509 | 10.008  | -0.00017800 | 4,00E-01    | 20623 | 11.104 | 11.110 | 0.99840 | 0.99901 | 0.00016200  | 8,95E-01    |
| 206.259.824.218.750 | 0.87475 | 0.88024 | 0.99531 | 10.008  | -0.00010200 | 3,27E-02    | 20626 | 11.127 | 11.122 | 0.99956 | 0.99909 | 0.00038700  | 0.00011500  |
| 206.288.222.656.250 | 0.87443 | 0.87980 | 0.99548 | 10.008  | -0.00015900 | -2,49E-01   | 20629 | 11.126 | 11.135 | 0.99830 | 0.99917 | 0.00082600  | 6,74E-01    |
| 206.316.640.625.000 | 0.87385 | 0.87935 | 0.99538 | 10.009  | -0.00024400 | -3,23E-01   | 20632 | 11.174 | 11.147 | 10.019  | 0.99925 | 0.00076900  | -0.00011700 |
| 206.346.210.937.500 | 0.87302 | 0.87888 | 0.99505 | 10.009  | -0.00034600 | -3,44E-01   | 20635 | 11.171 | 11.160 | 10.004  | 0.99933 | 0.00014700  | -5,48E-01   |
| 206.374.628.906.250 | 0.87184 | 0.87844 | 0.99435 | 10.009  | -0.00044300 | -2,35E-01   | 20637 | 11.182 | 11.172 | 10.004  | 0.99940 | 0.00045200  | 6,92E-01    |
| 206.404.218.750.000 | 0.87045 | 0.87797 | 0.99346 | 10.010  | -0.00048200 | 1,10E-01    | 20640 | 11.197 | 11.185 | 10.006  | 0.99948 | 0.00054800  | -6,43E-01   |
| 206.433.789.062.500 | 0.86899 | 0.87751 | 0.99250 | 10.010  | -0.00037800 | 6,12E-01    | 20643 | 11.215 | 11.198 | 10.012  | 0.99956 | 7,13E-01    | -7,07E-01   |

|                     |         |         |         |        |             |           |       |        |        |         |         |             |             |
|---------------------|---------|---------|---------|--------|-------------|-----------|-------|--------|--------|---------|---------|-------------|-------------|
| 206.462.246.093.750 | 0.86826 | 0.87706 | 0.99225 | 10.010 | -0.00012700 | 8,62E-01  | 20646 | 11.201 | 11.211 | 0.99862 | 0.99963 | 0.00013800  | 9,63E-01    |
| 206.491.855.468.750 | 0.86825 | 0.87659 | 0.99274 | 10.011 | 0.00012300  | 7,47E-01  | 20649 | 11.223 | 11.224 | 0.99957 | 0.99970 | 0.00063100  | 7,42E-01    |
| 206.521.464.843.750 | 0.86898 | 0.87613 | 0.99397 | 10.011 | 0.00031500  | 4,73E-01  | 20652 | 11.238 | 11.238 | 0.99986 | 0.99978 | 0.00057700  | 9,46E-02    |
| 206.551.074.218.750 | 0.87012 | 0.87566 | 0.99560 | 10.011 | 0.00040300  | 9,50E-02  | 20655 | 11.257 | 11.251 | 10.005  | 0.99985 | 0.00068700  | -3,17E-01   |
| 206.580.703.125.000 | 0.87137 | 0.87520 | 0.99735 | 10.012 | 0.00037200  | -1,91E-01 | 20658 | 11.279 | 11.264 | 10.014  | 0.99993 | 0.00038900  | -0.00012100 |
| 206.610.351.562.500 | 0.87232 | 0.87473 | 0.99879 | 10.012 | 0.00029000  | -2,42E-01 | 20661 | 11.280 | 11.278 | 10.003  | 100.000 | -3,02E-01   | -1,92E-01   |
| 206.640.000.000.000 | 0.87309 | 0.87427 | 10.001  | 10.012 | 0.00022800  | -2,63E-01 | 20664 | 11.277 | 11.291 | 0.99868 | 10.001  | 0.00027500  | 0.00010200  |
| 206.669.648.437.500 | 0.87367 | 0.87380 | 10.011  | 10.013 | 0.00013300  | -3,26E-01 | 20667 | 11.296 | 11.305 | 0.99933 | 10.001  | 0.00057600  | 5,23E-01    |
| 206.699.316.406.250 | 0.87388 | 0.87334 | 10.018  | 10.013 | 3,48E-01    | -3,12E-01 | 20670 | 11.311 | 11.318 | 0.99952 | 10.002  | 0.00058500  | -4,72E-01   |
| 206.728.984.375.000 | 0.87388 | 0.87287 | 10.023  | 10.013 | -5,21E-01   | -2,46E-01 | 20673 | 11.331 | 11.332 | 10.002  | 10.003  | 0.00029500  | -2,29E-01   |
| 206.759.804.687.500 | 0.87356 | 0.87239 | 10.025  | 10.013 | -0.00011400 | -2,00E-01 | 20676 | 11.329 | 11.346 | 0.99866 | 10.003  | 0.00044700  | 5,13E-01    |
| 206.789.492.187.500 | 0.87319 | 0.87192 | 10.026  | 10.014 | -0.00017300 | -5,47E-02 | 20679 | 11.358 | 11.360 | 10.003  | 10.004  | 0.00060600  | -1,79E-01   |
| 206.819.179.687.500 | 0.87254 | 0.87145 | 10.025  | 10.014 | -0.00014600 | 1,10E-01  | 20682 | 11.365 | 11.374 | 0.99963 | 10.005  | 0.00034000  | -2,41E-01   |
| 206.850.039.062.500 | 0.87230 | 0.87097 | 10.028  | 10.014 | -0.00010600 | 8,65E-02  | 20685 | 11.379 | 11.388 | 0.99962 | 10.005  | 0.00046000  | -1,21E-01   |
| 206.879.746.093.750 | 0.87189 | 0.87050 | 10.028  | 10.014 | -9,40E-01   | 1,70E-01  | 20688 | 11.393 | 11.402 | 0.99971 | 10.006  | 0.00026700  | 1,74E-01    |
| 206.910.605.468.750 | 0.87173 | 0.87002 | 10.032  | 10.015 | -3,22E-02   | 2,14E-01  | 20691 | 11.395 | 11.417 | 0.99853 | 10.007  | 0.00056600  | 4,48E-01    |
| 206.940.351.562.500 | 0.87187 | 0.86955 | 10.038  | 10.015 | 3,57E-01    | 9,63E-02  | 20694 | 11.427 | 11.431 | 10.004  | 10.007  | 0.00053900  | -4,19E-01   |
| 206.971.230.468.750 | 0.87195 | 0.86906 | 10.044  | 10.015 | 5,51E-01    | 1,27E-01  | 20697 | 11.428 | 11.445 | 0.99905 | 10.008  | 0.00031100  | 8,46E-02    |
| 207.002.128.906.250 | 0.87221 | 0.86858 | 10.052  | 10.015 | 0.00011400  | 1,41E-01  | 20700 | 11.447 | 11.460 | 0.99952 | 10.009  | 0.00059100  | 7,48E-01    |
| 207.031.894.531.250 | 0.87264 | 0.86811 | 10.061  | 10.016 | 0.00014100  | 4,65E-02  | 20703 | 11.464 | 11.474 | 0.99986 | 10.009  | 0.00076500  | -1,31E-01   |
| 207.062.792.968.750 | 0.87307 | 0.86762 | 10.070  | 10.016 | 0.00014200  | -2,85E-02 | 20706 | 11.493 | 11.489 | 10.014  | 10.010  | 0.00051200  | -4,80E-01   |
| 207.093.710.937.500 | 0.87352 | 0.86713 | 10.080  | 10.016 | 0.00012300  | -2,42E-01 | 20709 | 11.495 | 11.504 | 10.002  | 10.010  | 0.00046800  | 6,25E-01    |
| 207.124.648.437.500 | 0.87383 | 0.86665 | 10.088  | 10.016 | -7,40E-02   | -5,06E-01 | 20712 | 11.522 | 11.519 | 10.014  | 10.011  | 0.00089900  | -7,25E-01   |
| 207.155.585.937.500 | 0.87347 | 0.86616 | 10.089  | 10.016 | -0.00019000 | -5,26E-01 | 20716 | 11.551 | 11.534 | 10.028  | 10.012  | 1,92E-01    | -0.00011800 |
| 207.186.542.968.750 | 0.87265 | 0.86567 | 10.086  | 10.016 | -0.00033300 | -4,20E-01 | 20719 | 11.523 | 11.549 | 0.99862 | 10.012  | 0.00016800  | 0.00010900  |
| 207.217.500.000.000 | 0.87141 | 0.86518 | 10.079  | 10.016 | -0.00045000 | -2,40E-01 | 20722 | 11.561 | 11.564 | 10.010  | 10.013  | 0.00069300  | 1,51E-01    |
| 207.248.476.562.500 | 0.86987 | 0.86469 | 10.068  | 10.017 | -0.00048100 | 8,22E-02  | 20725 | 11.566 | 11.580 | 0.99998 | 10.013  | 0.00026200  | 6,81E-01    |
| 207.279.453.125.000 | 0.86843 | 0.86420 | 10.059  | 10.017 | -0.00039900 | 2,13E-01  | 20728 | 11.577 | 11.595 | 0.99964 | 10.014  | 0.0011200   | 7,84E-01    |
| 207.310.429.687.500 | 0.86740 | 0.86371 | 10.054  | 10.017 | -0.00034900 | -4,26E-02 | 20731 | 11.635 | 11.610 | 10.039  | 10.015  | 0.00074700  | -0.00021100 |
| 207.341.425.781.250 | 0.86627 | 0.86322 | 10.047  | 10.017 | -0.00042500 | -2,58E-01 | 20734 | 11.624 | 11.626 | 10.013  | 10.015  | -0.00019000 | -7,20E-01   |
| 207.373.593.750.000 | 0.86471 | 0.86271 | 10.037  | 10.017 | -0.00051200 | -2,21E-01 | 20737 | 11.623 | 11.642 | 0.99969 | 10.016  | 0.00029300  | 0.00016200  |
| 207.404.609.375.000 | 0.86303 | 0.86222 | 10.025  | 10.017 | -0.00056500 | -5,95E-02 | 20740 | 11.642 | 11.658 | 10.001  | 10.016  | 0.00083000  | 6,78E-01    |
| 207.435.625.000.000 | 0.86121 | 0.86173 | 10.012  | 10.017 | -0.00054900 | 1,46E-01  | 20744 | 11.675 | 11.673 | 10.018  | 10.017  | 0.00071400  | -8,26E-01   |
| 207.467.812.500.000 | 0.85956 | 0.86122 | 10.001  | 10.017 | -0.00047300 | 3,19E-01  | 20747 | 11.687 | 11.690 | 10.015  | 10.017  | 0.00030800  | -4,26E-01   |
| 207.498.867.187.500 | 0.85822 | 0.86072 | 0.99921 | 10.017 | -0.00034700 | 3,52E-01  | 20750 | 11.694 | 11.705 | 10.007  | 10.018  | 0.00044400  | 7,28E-01    |

|                     |         |         |         |        |             |           |       |        |        |         |        |            |             |
|---------------------|---------|---------|---------|--------|-------------|-----------|-------|--------|--------|---------|--------|------------|-------------|
| 207.531.054.687.500 | 0.85736 | 0.86021 | 0.99887 | 10.017 | -0.00025000 | 9,64E-02  | 20753 | 11.716 | 11.722 | 10.012  | 10.018 | 0.00076900 | -2,03E-02   |
| 207.563.281.250.000 | 0.85661 | 0.85970 | 0.99863 | 10.017 | -0.00028500 | -1,46E-01 | 20756 | 11.744 | 11.738 | 10.024  | 10.019 | 0.00043100 | -8,04E-01   |
| 207.594.355.468.750 | 0.85556 | 0.85921 | 0.99807 | 10.017 | -0.00034200 | -1,38E-01 | 20759 | 11.743 | 11.754 | 10.008  | 10.019 | 0.00026000 | 4,86E-01    |
| 207.626.582.031.250 | 0.85444 | 0.85870 | 0.99747 | 10.017 | -0.00037300 | -1,67E-01 | 20763 | 11.760 | 11.771 | 10.009  | 10.020 | 0.00073900 | 3,97E-01    |
| 207.658.828.125.000 | 0.85316 | 0.85818 | 0.99669 | 10.017 | -0.00045000 | -2,02E-01 | 20766 | 11.790 | 11.788 | 10.023  | 10.020 | 0.00051600 | -8,16E-01   |
| 207.689.921.875.000 | 0.85159 | 0.85769 | 0.99562 | 10.017 | -0.00050100 | 1,45E-02  | 20769 | 11.793 | 11.804 | 10.010  | 10.021 | 0.00022200 | 3,78E-01    |
| 207.722.187.500.000 | 0.84998 | 0.85718 | 0.99452 | 10.017 | -0.00044100 | 3,44E-01  | 20772 | 11.805 | 11.821 | 10.005  | 10.021 | 0.00075600 | 5,85E-01    |
| 207.754.472.656.250 | 0.84875 | 0.85667 | 0.99379 | 10.017 | -0.00027900 | 4,43E-01  | 20775 | 11.842 | 11.838 | 10.026  | 10.022 | 0.00060000 | -7,19E-01   |
| 207.786.757.812.500 | 0.84818 | 0.85616 | 0.99374 | 10.017 | -0.00015500 | 3,38E-01  | 20779 | 11.843 | 11.855 | 10.011  | 10.022 | 0.00029200 | -3,97E-01   |
| 207.819.042.968.750 | 0.84775 | 0.85564 | 0.99381 | 10.017 | -6,03E-01   | 3,48E-01  | 20782 | 11.860 | 11.872 | 10.011  | 10.023 | 0.00034400 | 2,23E-01    |
| 207.851.347.656.250 | 0.84779 | 0.85513 | 0.99436 | 10.017 | 7,03E-01    | 3,87E-01  | 20785 | 11.865 | 11.889 | 0.99996 | 10.023 | 0.00043500 | 0.00012700  |
| 207.883.671.875.000 | 0.84821 | 0.85462 | 0.99528 | 10.017 | 0.00019000  | 3,70E-01  | 20788 | 11.889 | 11.906 | 10.006  | 10.024 | 0.00116000 | -2,57E-02   |
| 207.917.148.437.500 | 0.84904 | 0.85409 | 0.99664 | 10.017 | 0.00031400  | 3,24E-01  | 20792 | 11.942 | 11.924 | 10.042  | 10.024 | 0.00041900 | -0.00014600 |
| 207.949.492.187.500 | 0.85027 | 0.85358 | 0.99837 | 10.017 | 0.00040300  | 1,79E-01  | 20795 | 11.916 | 11.942 | 0.99991 | 10.025 | 0.00020000 | 6,46E-01    |
| 207.981.835.937.500 | 0.85165 | 0.85306 | 10.003  | 10.017 | 0.00043000  | -2,84E-02 | 20798 | 11.955 | 11.959 | 10.021  | 10.025 | 0.00083700 | 8,29E-01    |
| 208.014.179.687.500 | 0.85305 | 0.85255 | 10.022  | 10.017 | 0.00038500  | -2,52E-01 | 20801 | 11.970 | 11.977 | 10.019  | 10.026 | 0.00073600 | -2,60E-01   |
| 208.047.714.843.750 | 0.85419 | 0.85202 | 10.038  | 10.016 | 0.00026400  | -4,82E-01 | 20805 | 12.003 | 11.995 | 10.034  | 10.026 | 0.00066500 | -5,90E-01   |
| 208.080.078.125.000 | 0.85479 | 0.85151 | 10.049  | 10.016 | 6,74E-01    | -5,95E-01 | 20808 | 12.014 | 12.013 | 10.028  | 10.026 | 0.00034700 | 4,14E-01    |
| 208.113.632.812.500 | 0.85463 | 0.85098 | 10.053  | 10.016 | -0.00012900 | -5,05E-01 | 20811 | 12.026 | 12.031 | 10.022  | 10.027 | 0.00093800 | 6,30E-01    |
| 208.146.035.156.250 | 0.85394 | 0.85046 | 10.051  | 10.016 | -0.00026600 | -2,68E-01 | 20815 | 12.076 | 12.049 | 10.054  | 10.027 | 0.00076300 | -9,30E-01   |
| 208.179.589.843.750 | 0.85288 | 0.84993 | 10.045  | 10.016 | -0.00030500 | -4,58E-02 | 20818 | 12.076 | 12.067 | 10.037  | 10.028 | 0.00032500 | 1,15E-01    |
| 208.212.011.718.750 | 0.85193 | 0.84942 | 10.041  | 10.016 | -0.00029600 | 1,52E-01  | 20821 | 12.097 | 12.086 | 10.040  | 10.028 | 0.00083900 | 5,21E-01    |
| 208.245.605.468.750 | 0.85093 | 0.84889 | 10.036  | 10.016 | -0.00020500 | 3,05E-01  | 20825 | 12.132 | 12.104 | 10.056  | 10.028 | 0.00066900 | -7,55E-01   |
| 208.279.199.218.750 | 0.85055 | 0.84836 | 10.037  | 10.016 | -9,06E-01   | 2,66E-01  | 20828 | 12.142 | 12.123 | 10.048  | 10.029 | 0.00033200 | -1,77E-01   |
| 208.311.640.625.000 | 0.85033 | 0.84785 | 10.040  | 10.015 | -2,94E-01   | 1,57E-01  | 20831 | 12.154 | 12.141 | 10.042  | 10.029 | 0.00055200 | 1,95E-01    |
| 208.345.273.437.500 | 0.85036 | 0.84732 | 10.046  | 10.015 | 1,28E-01    | 9,09E-02  | 20835 | 12.179 | 12.160 | 10.048  | 10.030 | 0.00046100 | -6,70E-01   |
| 208.378.906.250.000 | 0.85042 | 0.84679 | 10.051  | 10.015 | 3,18E-01    | -2,22E-02 | 20838 | 12.185 | 12.179 | 10.036  | 10.030 | 0.00010100 | 4,75E-01    |
| 208.412.539.062.500 | 0.85057 | 0.84626 | 10.058  | 10.015 | -2,14E-02   | -2,28E-01 | 20841 | 12.186 | 12.198 | 10.018  | 10.030 | 0.00078100 | 0.00011000  |
| 208.446.191.406.250 | 0.85040 | 0.84574 | 10.061  | 10.015 | -0.00012200 | -3,14E-01 | 20845 | 12.237 | 12.218 | 10.050  | 10.031 | 0.00084300 | -8,83E-01   |
| 208.479.863.281.250 | 0.84975 | 0.84521 | 10.060  | 10.015 | -0.00021400 | -2,32E-01 | 20848 | 12.242 | 12.237 | 10.037  | 10.031 | 0.00018600 | 9,48E-02    |
| 208.513.535.156.250 | 0.84896 | 0.84468 | 10.057  | 10.014 | -0.00027800 | -1,45E-01 | 20851 | 12.250 | 12.256 | 10.025  | 10.032 | 0.00090700 | 9,17E-01    |
| 208.547.226.562.500 | 0.84788 | 0.84415 | 10.052  | 10.014 | -0.00031100 | -2,51E-02 | 20855 | 12.303 | 12.276 | 10.060  | 10.032 | 0.00080400 | -9,12E-01   |
| 208.580.917.968.750 | 0.84686 | 0.84363 | 10.046  | 10.014 | -0.00029400 | 4,21E-02  | 20858 | 12.304 | 12.295 | 10.041  | 10.032 | 0.00029300 | -9,28E-01   |
| 208.615.781.250.000 | 0.84586 | 0.84308 | 10.042  | 10.014 | -0.00028200 | -3,05E-02 | 20862 | 12.324 | 12.316 | 10.041  | 10.033 | 0.00016700 | 6,24E-01    |
| 208.649.511.718.750 | 0.84493 | 0.84256 | 10.037  | 10.014 | -0.00031500 | -1,41E-01 | 20865 | 12.315 | 12.335 | 10.013  | 10.033 | 0.00072100 | 0.00011600  |

|                     |         |         |         |        |             |           |       |        |        |        |        |            |           |
|---------------------|---------|---------|---------|--------|-------------|-----------|-------|--------|--------|--------|--------|------------|-----------|
| 208.683.242.187.500 | 0.84374 | 0.84203 | 10.031  | 10.013 | -0.00037700 | -1,46E-01 | 20868 | 12.372 | 12.355 | 10.050 | 10.033 | 0.00095000 | -3,68E-01 |
| 208.718.144.531.250 | 0.84234 | 0.84149 | 10.022  | 10.013 | -0.00041600 | -4,72E-02 | 20872 | 12.381 | 12.376 | 10.039 | 10.033 | 0.00046800 | -4,20E-01 |
| 208.751.894.531.250 | 0.84088 | 0.84096 | 10.012  | 10.013 | -0.00041000 | 4,50E-02  | 20875 | 12.404 | 12.395 | 10.043 | 10.034 | 0.00066200 | -8,95E-02 |
| 208.785.664.062.500 | 0.83957 | 0.84044 | 10.004  | 10.013 | -0.00038500 | 6,80E-02  | 20879 | 12.425 | 12.415 | 10.044 | 10.034 | 0.00040800 | -5,68E-02 |
| 208.820.585.937.500 | 0.83823 | 0.83990 | 0.99960 | 10.013 | -0.00036300 | 8,52E-02  | 20882 | 12.432 | 12.436 | 10.030 | 10.034 | 0.00062300 | 2,65E-01  |
| 208.855.546.875.000 | 0.83703 | 0.83936 | 0.99892 | 10.012 | -0.00032600 | 9,92E-02  | 20886 | 12.469 | 12.457 | 10.046 | 10.035 | 0.00059300 | -4,11E-02 |
| 208.889.335.937.500 | 0.83599 | 0.83883 | 0.99838 | 10.012 | -0.00029500 | 7,36E-03  | 20889 | 12.473 | 12.477 | 10.031 | 10.035 | 0.00059500 | -2,22E-03 |
| 208.924.316.406.250 | 0.83501 | 0.83829 | 0.99791 | 10.012 | -0.00032100 | -4,99E-02 | 20892 | 12.510 | 12.498 | 10.046 | 10.035 | 0.00059200 | -1,56E-01 |
| 208.959.296.875.000 | 0.83375 | 0.83775 | 0.99717 | 10.012 | -0.00033000 | 7,14E-02  | 20896 | 12.515 | 12.519 | 10.030 | 10.035 | 0.00048600 | 4,59E-02  |
| 208.993.144.531.250 | 0.83274 | 0.83723 | 0.99666 | 10.012 | -0.00027200 | 1,81E-01  | 20899 | 12.543 | 12.540 | 10.039 | 10.035 | 0.00062300 | 2,78E-02  |
| 209.028.144.531.250 | 0.83188 | 0.83670 | 0.99631 | 10.011 | -0.00020500 | 2,34E-01  | 20903 | 12.557 | 12.561 | 10.032 | 10.036 | 0.00050500 | -1,85E-02 |
| 209.063.164.062.500 | 0.83130 | 0.83616 | 0.99625 | 10.011 | -0.00010700 | 3,18E-01  | 20906 | 12.579 | 12.582 | 10.032 | 10.036 | 0.00061100 | 5,97E-01  |
| 209.098.203.125.000 | 0.83113 | 0.83562 | 0.99659 | 10.011 | 1,72E-01    | 2,74E-01  | 20910 | 12.600 | 12.604 | 10.032 | 10.036 | 0.00092300 | 3,37E-01  |
| 209.133.242.187.500 | 0.83142 | 0.83509 | 0.99739 | 10.011 | 8,47E-01    | 1,06E-01  | 20913 | 12.643 | 12.625 | 10.054 | 10.036 | 0.00084700 | -7,47E-01 |
| 209.168.300.781.250 | 0.83172 | 0.83455 | 0.99821 | 10.010 | 9,13E-01    | 1,38E-02  | 20917 | 12.660 | 12.647 | 10.049 | 10.036 | 0.00040000 | -3,63E-01 |
| 209.203.378.906.250 | 0.83206 | 0.83402 | 0.99906 | 10.010 | 9,43E-01    | -3,04E-02 | 20920 | 12.671 | 12.669 | 10.039 | 10.036 | 0.00059200 | 2,86E-02  |
| 209.238.457.031.250 | 0.83238 | 0.83349 | 0.99989 | 10.010 | 7,00E-01    | -6,03E-02 | 20924 | 12.701 | 12.690 | 10.047 | 10.037 | 0.00042000 | -2,56E-01 |
| 209.273.554.687.500 | 0.83255 | 0.83296 | 10.006  | 10.010 | 5,20E-01    | -5,07E-02 | 20927 | 12.701 | 12.712 | 10.025 | 10.037 | 0.00041200 | 1,45E-01  |
| 209.308.652.343.750 | 0.83275 | 0.83243 | 10.013  | 10.009 | 3,44E-01    | -1,09E-01 | 20931 | 12.730 | 12.734 | 10.033 | 10.037 | 0.00052200 | -2,74E-02 |
| 209.344.941.406.250 | 0.83280 | 0.83188 | 10.018  | 10.009 | -2,55E-01   | -1,52E-01 | 20934 | 12.738 | 12.757 | 10.018 | 10.037 | 0.00039300 | 3,01E-01  |
| 209.380.078.125.000 | 0.83257 | 0.83135 | 10.021  | 10.009 | -7,43E-01   | -1,43E-01 | 20938 | 12.758 | 12.779 | 10.016 | 10.037 | 0.00073700 | 7,13E-01  |
| 209.415.214.843.750 | 0.83228 | 0.83082 | 10.023  | 10.009 | -0.00012600 | -1,68E-01 | 20942 | 12.790 | 12.801 | 10.026 | 10.037 | 0.00089400 | 1,33E-01  |
| 209.451.542.968.750 | 0.83167 | 0.83028 | 10.022  | 10.009 | -0.00019400 | -1,10E-01 | 20945 | 12.822 | 12.824 | 10.035 | 10.037 | 0.00083200 | -5,28E-01 |
| 209.486.699.218.750 | 0.83089 | 0.82975 | 10.020  | 10.008 | -0.00020400 | 1,04E-02  | 20949 | 12.849 | 12.846 | 10.040 | 10.037 | 0.00051700 | -3,75E-01 |
| 209.523.046.875.000 | 0.83020 | 0.82921 | 10.018  | 10.008 | -0.00018700 | 1,35E-02  | 20952 | 12.859 | 12.869 | 10.026 | 10.037 | 0.00056400 | 1,61E-01  |
| 209.558.242.187.500 | 0.82955 | 0.82869 | 10.017  | 10.008 | -0.00019500 | -3,29E-02 | 20956 | 12.890 | 12.892 | 10.035 | 10.037 | 0.00063200 | -9,62E-02 |
| 209.594.609.375.000 | 0.82881 | 0.82815 | 10.014  | 10.008 | -0.00021000 | -2,47E-02 | 20959 | 12.904 | 12.915 | 10.026 | 10.037 | 0.00049500 | 1,36E-01  |
| 209.629.824.218.750 | 0.82804 | 0.82763 | 10.012  | 10.008 | -0.00021200 | 7,21E-02  | 20963 | 12.925 | 12.938 | 10.024 | 10.037 | 0.00072900 | 2,80E-01  |
| 209.666.230.468.750 | 0.82729 | 0.82709 | 10.009  | 10.007 | -0.00015900 | 1,99E-01  | 20967 | 12.956 | 12.961 | 10.032 | 10.037 | 0.00069500 | 1,35E-01  |
| 209.702.636.718.750 | 0.82689 | 0.82656 | 10.010  | 10.007 | -6,76E-01   | 2,21E-01  | 20970 | 12.976 | 12.985 | 10.027 | 10.037 | 0.00082800 | 6,77E-02  |
| 209.739.082.031.250 | 0.82680 | 0.82602 | 10.015  | 10.007 | 2,04E-02    | 1,47E-01  | 20974 | 13.017 | 13.008 | 10.045 | 10.036 | 0.00074400 | -3,86E-01 |
| 209.774.335.937.500 | 0.82690 | 0.82550 | 10.021  | 10.007 | 3,77E-01    | 4,81E-02  | 20977 | 13.029 | 13.031 | 10.034 | 10.036 | 0.00055100 | -4,67E-01 |
| 209.810.781.250.000 | 0.82707 | 0.82497 | 10.027  | 10.006 | 3,65E-01    | -9,63E-02 | 20981 | 13.056 | 13.055 | 10.037 | 10.036 | 0.00041000 | -4,68E-02 |
| 209.847.246.093.750 | 0.82717 | 0.82444 | 10.034  | 10.006 | -3,25E-01   | -2,44E-01 | 20985 | 13.059 | 13.079 | 10.016 | 10.036 | 0.00051700 | 6,02E-01  |
| 209.883.730.468.750 | 0.82683 | 0.82391 | 10.035  | 10.006 | -0.00014100 | -2,21E-01 | 20988 | 13.094 | 13.103 | 10.027 | 10.036 | 0.00084900 | 4,99E-01  |

|                     |         |         |         |         |             |           |       |        |        |        |        |            |             |
|---------------------|---------|---------|---------|---------|-------------|-----------|-------|--------|--------|--------|--------|------------|-------------|
| 209.920.214.843.750 | 0.82614 | 0.82338 | 10.033  | 10.006  | -0.00019400 | -4,49E-02 | 20992 | 13.121 | 13.127 | 10.029 | 10.035 | 0.00088000 | -1,96E-01   |
| 209.956.718.750.000 | 0.82541 | 0.82285 | 10.031  | 10.006  | -0.00017400 | -1,26E-02 | 20996 | 13.158 | 13.151 | 10.042 | 10.035 | 0.00070600 | -5,56E-01   |
| 209.993.242.187.500 | 0.82487 | 0.82233 | 10.031  | 10.006  | -0.00020300 | -9,94E-02 | 20999 | 13.172 | 13.175 | 10.032 | 10.035 | 0.00047400 | -1,35E-02   |
| 210.029.765.625.000 | 0.82393 | 0.82180 | 10.027  | 10.005  | -0.00024700 | -3,16E-02 | 21003 | 13.193 | 13.200 | 10.028 | 10.035 | 0.00069600 | 4,10E-01    |
| 210.067.480.468.750 | 0.82304 | 0.82126 | 10.023  | 10.005  | -0.00022700 | -4,55E-03 | 21007 | 13.224 | 13.225 | 10.033 | 10.034 | 0.00077900 | -8,45E-02   |
| 210.104.042.968.750 | 0.82224 | 0.82073 | 10.020  | 10.005  | -0.00025000 | -1,98E-02 | 21010 | 13.251 | 13.249 | 10.035 | 10.034 | 0.00063300 | -4,83E-01   |
| 210.140.605.468.750 | 0.82121 | 0.82021 | 10.015  | 10.005  | -0.00024100 | 3,12E-02  | 21014 | 13.270 | 13.274 | 10.030 | 10.034 | 0.00042500 | 3,69E-01    |
| 210.178.359.375.000 | 0.82045 | 0.81967 | 10.012  | 10.004  | -0.00022700 | -3,71E-02 | 21018 | 13.282 | 13.299 | 10.016 | 10.033 | 0.00090700 | 5,76E-01    |
| 210.214.960.937.500 | 0.81952 | 0.81915 | 10.008  | 10.004  | -0.00026900 | -6,43E-02 | 21021 | 13.338 | 13.324 | 10.047 | 10.033 | 0.00085400 | -6,30E-01   |
| 210.251.562.500.000 | 0.81848 | 0.81863 | 10.003  | 10.004  | -0.00027400 | -3,43E-02 | 21025 | 13.345 | 13.349 | 10.028 | 10.032 | 0.00044600 | -4,74E-02   |
| 210.289.375.000.000 | 0.81748 | 0.81809 | 0.99978 | 10.004  | -0.00029400 | -4,60E-02 | 21029 | 13.371 | 13.375 | 10.028 | 10.032 | 0.00081900 | 3,56E-01    |
| 210.325.996.093.750 | 0.81629 | 0.81757 | 0.99909 | 10.004  | -0.00030800 | 2,86E-02  | 21033 | 13.406 | 13.399 | 10.038 | 10.031 | 0.00071100 | -3,48E-01   |
| 210.363.828.125.000 | 0.81519 | 0.81703 | 0.99850 | 10.003  | -0.00027300 | 7,96E-02  | 21036 | 13.424 | 13.425 | 10.030 | 10.031 | 0.00055900 | 7,14E-02    |
| 210.401.679.687.500 | 0.81423 | 0.81650 | 0.99805 | 10.003  | -0.00024800 | 8,45E-02  | 21040 | 13.448 | 13.451 | 10.027 | 10.030 | 0.00076500 | 1,41E-01    |
| 210.438.339.843.750 | 0.81334 | 0.81598 | 0.99767 | 10.003  | -0.00021000 | 1,30E-01  | 21044 | 13.481 | 13.476 | 10.034 | 10.030 | 0.00066500 | -8,79E-02   |
| 210.476.210.937.500 | 0.81266 | 0.81544 | 0.99749 | 10.003  | -0.00015100 | 1,41E-01  | 21048 | 13.498 | 13.502 | 10.024 | 10.029 | 0.00069900 | 2,47E-01    |
| 210.514.101.562.500 | 0.81220 | 0.81491 | 0.99754 | 10.003  | -0.00010400 | 8,83E-02  | 21051 | 13.534 | 13.528 | 10.034 | 10.028 | 0.00085200 | 9,30E-02    |
| 210.551.992.187.500 | 0.81187 | 0.81438 | 0.99773 | 10.002  | -8,42E-01   | -1,77E-02 | 21055 | 13.562 | 13.555 | 10.035 | 10.027 | 0.00077000 | -3,22E-01   |
| 210.588.710.937.500 | 0.81157 | 0.81386 | 0.99791 | 10.002  | -0.00011700 | -2,22E-02 | 21059 | 13.591 | 13.580 | 10.038 | 10.027 | 0.00061200 | -3,91E-01   |
| 210.626.640.625.000 | 0.81100 | 0.81333 | 0.99786 | 10.002  | -0.00010100 | 1,05E-01  | 21063 | 13.608 | 13.606 | 10.027 | 10.026 | 0.00047800 | 6,91E-01    |
| 210.664.570.312.500 | 0.81080 | 0.81279 | 0.99816 | 10.002  | -3,70E-01   | 1,30E-01  | 21066 | 13.628 | 13.633 | 10.020 | 10.025 | 0.0011400  | 6,06E-01    |
| 210.702.539.062.500 | 0.81072 | 0.81226 | 0.99859 | 10.001  | -2,40E-02   | 2,33E-02  | 21070 | 13.694 | 13.659 | 10.059 | 10.024 | 0.00093800 | -0.00012100 |
| 210.740.488.281.250 | 0.81079 | 0.81173 | 0.99915 | 10.001  | -1,93E-01   | -3,79E-02 | 21074 | 13.699 | 13.686 | 10.036 | 10.023 | 0.00022100 | -5,91E-01   |
| 210.778.476.562.500 | 0.81058 | 0.81120 | 0.99945 | 10.001  | -3,12E-01   | 1,23E-02  | 21078 | 13.711 | 13.712 | 10.021 | 10.022 | 0.00048900 | 6,32E-01    |
| 210.817.656.250.000 | 0.81055 | 0.81065 | 0.99993 | 10.000  | -9,85E-02   | -1,06E-05 | 21082 | 13.737 | 13.740 | 10.018 | 10.021 | 0.00070800 | 5,51E-01    |
| 210.855.664.062.500 | 0.81050 | 0.81012 | 10.004  | 10.000  | -3,12E-01   | -5,91E-02 | 21086 | 13.766 | 13.766 | 10.019 | 10.020 | 0.00091400 | -1,07E-01   |
| 210.893.691.406.250 | 0.81031 | 0.80959 | 10.007  | 0.99998 | -5,48E-01   | -6,08E-02 | 21089 | 13.806 | 13.793 | 10.032 | 10.018 | 0.00062700 | -7,27E-01   |
| 210.931.718.750.000 | 0.81008 | 0.80906 | 10.010  | 0.99995 | -7,75E-01   | -8,79E-02 | 21093 | 13.813 | 13.820 | 10.011 | 10.017 | 0.00036100 | 1,98E-01    |
| 210.970.957.031.250 | 0.80971 | 0.80851 | 10.011  | 0.99991 | -0.00012300 | -8,75E-02 | 21097 | 13.834 | 13.847 | 10.002 | 10.016 | 0.00078000 | 7,86E-01    |
| 211.009.023.437.500 | 0.80913 | 0.80798 | 10.010  | 0.99988 | -0.00014500 | -5,94E-02 | 21101 | 13.874 | 13.874 | 10.014 | 10.014 | 0.00096900 | 3,20E-01    |
| 211.047.089.843.750 | 0.80861 | 0.80745 | 10.010  | 0.99985 | -0.00016800 | -8,47E-02 | 21105 | 13.908 | 13.901 | 10.019 | 10.013 | 0.0010200  | -4,46E-01   |
| 211.086.367.187.500 | 0.80784 | 0.80690 | 10.007  | 0.99981 | -0.00021100 | -5,47E-02 | 21109 | 13.953 | 13.929 | 10.035 | 10.011 | 0.00062400 | -6,99E-01   |
| 211.124.472.656.250 | 0.80698 | 0.80637 | 10.004  | 0.99977 | -0.00021000 | 4,77E-02  | 21112 | 13.956 | 13.956 | 10.010 | 10.010 | 0.00048200 | 1,00E-01    |
| 211.163.789.062.500 | 0.80621 | 0.80583 | 10.001  | 0.99973 | -0.00017400 | 6,78E-02  | 21116 | 13.990 | 13.984 | 10.014 | 10.008 | 0.00070100 | -1,61E-01   |
| 211.203.125.000.000 | 0.80561 | 0.80528 | 10.000  | 0.99969 | -0.00015700 | 3,81E-02  | 21120 | 14.011 | 14.012 | 10.005 | 10.006 | 0.00035600 | 8,24E-02    |

|                     |         |         |         |         |             |           |       |        |        |         |         |            |             |
|---------------------|---------|---------|---------|---------|-------------|-----------|-------|--------|--------|---------|---------|------------|-------------|
| 211.241.269.531.250 | 0.80499 | 0.80475 | 0.99990 | 0.99965 | -0.00014400 | 1,42E-02  | 21124 | 14.018 | 14.039 | 0.99827 | 10.004  | 0.00076500 | 7,14E-01    |
| 211.280.625.000.000 | 0.80449 | 0.80420 | 0.99990 | 0.99961 | -0.00014600 | -6,20E-03 | 21128 | 14.071 | 14.067 | 10.006  | 10.002  | 0.00090900 | -2,03E-01   |
| 211.320.000.000.000 | 0.80384 | 0.80365 | 0.99975 | 0.99956 | -0.00014900 | 1,58E-02  | 21132 | 14.089 | 14.095 | 0.99941 | 0.99999 | 0.00060600 | -9,72E-02   |
| 211.358.183.593.750 | 0.80334 | 0.80312 | 0.99974 | 0.99952 | -0.00013400 | 1,84E-02  | 21136 | 14.118 | 14.122 | 0.99932 | 0.99977 | 0.00083300 | 2,58E-01    |
| 211.397.578.125.000 | 0.80280 | 0.80257 | 0.99971 | 0.99947 | -0.00013500 | -2,46E-03 | 21140 | 14.154 | 14.150 | 0.99991 | 0.99954 | 0.00080600 | -4,18E-01   |
| 211.436.992.187.500 | 0.80228 | 0.80202 | 0.99968 | 0.99942 | -0.00013600 | -6,27E-03 | 21144 | 14.181 | 14.178 | 0.99958 | 0.99930 | 0.00050400 | -1,57E-01   |
| 211.476.425.781.250 | 0.80173 | 0.80147 | 0.99964 | 0.99937 | -0.00014000 | -2,02E-02 | 21148 | 14.194 | 14.206 | 0.99777 | 0.99905 | 0.00068200 | 9,10E-01    |
| 211.515.859.375.000 | 0.80118 | 0.80092 | 0.99958 | 0.99932 | -0.00015200 | 6,73E-03  | 21152 | 14.235 | 14.235 | 0.99882 | 0.99879 | 0.0012200  | 4,60E-02    |
| 211.555.332.031.250 | 0.80054 | 0.80037 | 0.99943 | 0.99927 | -0.00013400 | 2,69E-02  | 21156 | 14.290 | 14.263 | 10.012  | 0.99852 | 0.00071800 | -8,88E-01   |
| 211.594.804.687.500 | 0.80012 | 0.79982 | 0.99951 | 0.99921 | -0.00013000 | -8,15E-03 | 21159 | 14.291 | 14.291 | 0.99830 | 0.99824 | 0.00052000 | -2,95E-01   |
| 211.634.277.343.750 | 0.79951 | 0.79926 | 0.99940 | 0.99915 | -0.00014100 | -2,33E-02 | 21163 | 14.331 | 14.319 | 0.99914 | 0.99795 | 0.00048500 | -3,15E-01   |
| 211.673.789.062.500 | 0.79901 | 0.79871 | 0.99939 | 0.99909 | -0.00014900 | -5,85E-03 | 21167 | 14.330 | 14.347 | 0.99590 | 0.99765 | 0.00027200 | 4,42E-01    |
| 211.714.511.718.750 | 0.79831 | 0.79814 | 0.99920 | 0.99903 | -0.00014500 | -1,98E-02 | 21171 | 14.353 | 14.376 | 0.99496 | 0.99732 | 0.00084000 | 8,82E-01    |
| 211.754.042.968.750 | 0.79784 | 0.79759 | 0.99922 | 0.99897 | -0.00016500 | -2,55E-03 | 21175 | 14.397 | 14.405 | 0.99626 | 0.99700 | 0.00097900 | -5,99E-02   |
| 211.793.593.750.000 | 0.79701 | 0.79703 | 0.99888 | 0.99890 | -0.00014700 | 5,39E-02  | 21179 | 14.430 | 14.433 | 0.99640 | 0.99666 | 0.00079300 | -3,19E-01   |
| 211.833.144.531.250 | 0.79667 | 0.79648 | 0.99903 | 0.99884 | -0.00012200 | -1,07E-02 | 21183 | 14.460 | 14.461 | 0.99619 | 0.99631 | 0.00072700 | -2,85E-02   |
| 211.873.925.781.250 | 0.79603 | 0.79590 | 0.99889 | 0.99877 | -0.00015600 | -2,28E-02 | 21187 | 14.489 | 14.490 | 0.99578 | 0.99594 | 0.00077000 | -2,78E-02   |
| 211.913.515.625.000 | 0.79542 | 0.79534 | 0.99877 | 0.99870 | -0.00014000 | -8,01E-03 | 21191 | 14.522 | 14.519 | 0.99589 | 0.99557 | 0.00070500 | -1,21E-01   |
| 211.954.335.937.500 | 0.79490 | 0.79477 | 0.99875 | 0.99862 | -0.00016200 | -9,80E-02 | 21195 | 14.545 | 14.548 | 0.99494 | 0.99517 | 0.00067300 | 1,45E-01    |
| 211.993.945.312.500 | 0.79411 | 0.79421 | 0.99845 | 0.99855 | -0.00021900 | -6,64E-02 | 21199 | 14.576 | 14.576 | 0.99477 | 0.99477 | 0.00082100 | 2,02E-02    |
| 212.034.785.156.250 | 0.79313 | 0.79363 | 0.99797 | 0.99847 | -0.00021600 | 5,71E-02  | 21203 | 14.611 | 14.605 | 0.99499 | 0.99434 | 0.00068900 | -3,17E-01   |
| 212.074.453.125.000 | 0.79237 | 0.79307 | 0.99769 | 0.99839 | -0.00017300 | 6,88E-02  | 21207 | 14.631 | 14.633 | 0.99373 | 0.99392 | 0.00056600 | 2,11E-02    |
| 212.115.312.500.000 | 0.79174 | 0.79249 | 0.99755 | 0.99830 | -0.00016000 | 3,92E-02  | 21212 | 14.657 | 14.662 | 0.99294 | 0.99346 | 0.00070600 | 6,78E-01    |
| 212.156.210.937.500 | 0.79106 | 0.79191 | 0.99737 | 0.99821 | -0.00014100 | 6,36E-02  | 21216 | 14.689 | 14.691 | 0.99276 | 0.99300 | 0.0011200  | 2,93E-01    |
| 212.195.898.437.500 | 0.79060 | 0.79134 | 0.99739 | 0.99813 | -0.00010900 | 3,72E-02  | 21220 | 14.747 | 14.720 | 0.99530 | 0.99253 | 0.00094200 | -6,05E-01   |
| 212.236.835.937.500 | 0.79018 | 0.79076 | 0.99746 | 0.99804 | -0.00011100 | -1,79E-02 | 21224 | 14.765 | 14.749 | 0.99367 | 0.99203 | 0.00063300 | -2,47E-01   |
| 212.277.753.906.250 | 0.78969 | 0.79017 | 0.99746 | 0.99794 | -0.00012400 | -2,31E-02 | 21228 | 14.799 | 14.778 | 0.99366 | 0.99152 | 0.00074000 | 1,27E-01    |
| 212.318.710.937.500 | 0.78917 | 0.78958 | 0.99743 | 0.99784 | -0.00013000 | 7,20E-03  | 21232 | 14.826 | 14.807 | 0.99289 | 0.99099 | 0.00073700 | 1,29E-01    |
| 212.359.687.500.000 | 0.78862 | 0.78900 | 0.99737 | 0.99774 | -0.00011800 | -3,59E-03 | 21236 | 14.859 | 14.836 | 0.99283 | 0.99045 | 0.00084600 | 2,11E-02    |
| 212.399.453.125.000 | 0.78822 | 0.78842 | 0.99744 | 0.99764 | -0.00013300 | 2,96E-02  | 21240 | 14.894 | 14.864 | 0.99293 | 0.98990 | 0.00075400 | -2,40E-01   |
| 212.440.449.218.750 | 0.78755 | 0.78783 | 0.99726 | 0.99754 | -9,40E-01   | 9,01E-02  | 21244 | 14.920 | 14.893 | 0.99210 | 0.98933 | 0.00065200 | 3,27E-01    |
| 212.482.675.781.250 | 0.78744 | 0.78722 | 0.99764 | 0.99743 | -5,80E-01   | 7,95E-04  | 21248 | 14.948 | 14.922 | 0.99131 | 0.98871 | 0.0010300  | 1,00E-01    |
| 212.523.710.937.500 | 0.78707 | 0.78662 | 0.99776 | 0.99732 | -9,33E-01   | -4,70E-02 | 21252 | 15.006 | 14.951 | 0.99356 | 0.98810 | 0.00073600 | -0.00011600 |
| 212.564.746.093.750 | 0.78667 | 0.78603 | 0.99784 | 0.99720 | -9,66E-01   | -8,12E-03 | 21256 | 15.009 | 14.980 | 0.99035 | 0.98748 | 7,13E-01   | -0.00016200 |
