# Supplementary material
Source: PubMed Central journal article supplement (PMC8325642)
Supplement: NIHMS1698257-supplement-Fig__4A__Molybdate.pdf [file NIHMS1698257-supplement-Fig__4A__Molybdate.pdf]

| Energy | Molybdate  | nbkg       | Flat       | fbkg       | nder      | nsec      | H | Energy              | Mo Foil | nbkg      | flat      | fbkg      | nder      | nsec      |           |
|--------|------------|------------|------------|------------|-----------|-----------|---|---------------------|---------|-----------|-----------|-----------|-----------|-----------|-----------|
| 19690  | 0.0018100  | 0.0018100  | 0.0018100  | 0.0018100  | -3,28E-01 | 1,05E-02  |   | 196.895.292.968.750 |         | 0.011400  | 0.011400  | 0.011400  | 0.011400  | -6,38E-01 | 4,21E-02  |
| 19693  | 0.0016800  | 0.0016800  | 0.0016800  | 0.0016800  | -2,86E-01 | 6,44E-03  |   | 196.934.589.843.750 |         | 0.011200  | 0.011200  | 0.011200  | 0.011200  | -4,72E-01 | 1,96E-03  |
| 19697  | 0.0015800  | 0.0015800  | 0.0015800  | 0.0015800  | -2,76E-01 | -4,16E-03 |   | 196.974.921.875.000 |         | 0.011100  | 0.011100  | 0.011100  | 0.011100  | -6,22E-01 | -4,12E-02 |
| 19702  | 0.0014600  | 0.0014600  | 0.0014600  | 0.0014600  | -3,20E-01 | 5,05E-03  |   | 197.015.273.437.500 |         | 0.010700  | 0.010700  | 0.010700  | 0.010700  | -8,04E-01 | -3,64E-03 |
| 19705  | 0.0013300  | 0.0013300  | 0.0013300  | 0.0013300  | -2,36E-01 | 7,22E-03  |   | 197.054.628.906.250 |         | 0.010400  | 0.010400  | 0.010400  | 0.010400  | -6,51E-01 | 1,57E-02  |
| 19710  | 0.0012700  | 0.0012700  | 0.0012700  | 0.0012700  | -2,62E-01 | -1,12E-02 |   | 197.095.019.531.250 |         | 0.010200  | 0.010200  | 0.010200  | 0.010200  | -6,79E-01 | -1,05E-03 |
| 19714  | 0.0011200  | 0.0011200  | 0.0011200  | 0.0011200  | -3,26E-01 | -3,51E-04 |   | 197.135.429.687.500 |         | 0.0098800 | 0.0098800 | 0.0098800 | 0.0098800 | -6,59E-01 | -1,47E-02 |
| 19717  | 0.0010100  | 0.0010100  | 0.0010100  | 0.0010100  | -2,65E-01 | 7,39E-03  |   | 197.174.804.687.500 |         | 0.0096400 | 0.0096400 | 0.0096400 | 0.0096400 | -7,96E-01 | -3,00E-02 |
| 19722  | 0.00090400 | 0.00090400 | 0.00090400 | 0.00090400 | -2,67E-01 | 1,37E-03  |   | 197.215.253.906.250 |         | 0.0092400 | 0.0092400 | 0.0092400 | 0.0092400 | -8,99E-01 | 2,22E-02  |
| 19725  | 0.00079700 | 0.00079700 | 0.00079700 | 0.00079700 | -2,54E-01 | 7,00E-03  |   | 197.254.667.968.750 |         | 0.0089300 | 0.0089300 | 0.0089300 | 0.0089300 | -6,19E-01 | 3,74E-02  |
| 19730  | 0.00070100 | 0.00070100 | 0.00070100 | 0.00070100 | -2,12E-01 | -4,36E-03 |   | 197.295.156.250.000 |         | 0.0087500 | 0.0087500 | 0.0087500 | 0.0087500 | -6,00E-01 | -8,76E-03 |
| 19733  | 0.00062700 | 0.00062700 | 0.00062700 | 0.00062700 | -2,89E-01 | -1,11E-02 |   | 197.334.609.375.000 |         | 0.0084500 | 0.0084500 | 0.0084500 | 0.0084500 | -6,89E-01 | 4,06E-03  |
| 19738  | 0.00047000 | 0.00047000 | 0.00047000 | 0.00047000 | -3,00E-01 | 6,49E-03  |   | 197.375.117.187.500 |         | 0.0082000 | 0.0082000 | 0.0082000 | 0.0082000 | -5,68E-01 | -1,80E-04 |
| 19741  | 0.00038800 | 0.00038800 | 0.00038800 | 0.00038800 | -2,37E-01 | 9,40E-03  |   | 197.414.589.843.750 |         | 0.0079900 | 0.0079900 | 0.0079900 | 0.0079900 | -6,90E-01 | -1,59E-02 |
| 19746  | 0.00028000 | 0.00028000 | 0.00028000 | 0.00028000 | -2,25E-01 | 4,09E-04  |   | 197.455.136.718.750 |         | 0.0076400 | 0.0076400 | 0.0076400 | 0.0076400 | -6,95E-01 | 2,11E-02  |
| 19749  | 0.00020800 | 0.00020800 | 0.00020800 | 0.00020800 | -2,34E-01 | -3,44E-03 |   | 197.494.648.437.500 |         | 0.0074400 | 0.0074400 | 0.0074400 | 0.0074400 | -5,21E-01 | 5,42E-03  |

|       |             |             |             |             |           |           |                     |           |           |           |           |           |           |
|-------|-------------|-------------|-------------|-------------|-----------|-----------|---------------------|-----------|-----------|-----------|-----------|-----------|-----------|
| 19754 | 9,32E-01    | 9,32E-01    | 9,32E-01    | 9,32E-01    | -2,52E-01 | 1,61E-03  | 197.535.234.375.000 | 0.0072300 | 0.0072300 | 0.0072300 | 0.0072300 | -6,52E-01 | -2,45E-02 |
| 19757 | 5,56E-02    | 5,56E-02    | 5,56E-02    | 5,56E-02    | -2,21E-01 | 3,79E-03  | 197.574.785.156.250 | 0.0069100 | 0.0069100 | 0.0069100 | 0.0069100 | -7,18E-01 | 2,61E-03  |
| 19762 | -8,39E-01   | -8,39E-01   | -8,39E-01   | -8,39E-01   | -2,22E-01 | -3,61E-03 | 197.615.390.625.000 | 0.0066500 | 0.0066500 | 0.0066500 | 0.0066500 | -6,31E-01 | -4,14E-03 |
| 19765 | -0.00017200 | -0.00017200 | -0.00017200 | -0.00017200 | -2,50E-01 | -7,93E-03 | 197.654.980.468.750 | 0.0064100 | 0.0064100 | 0.0064100 | 0.0064100 | -7,51E-01 | -9,95E-03 |
| 19769 | -0.00028200 | -0.00028200 | -0.00028200 | -0.00028200 | -2,85E-01 | 4,71E-03  | 197.694.570.312.500 | 0.0060600 | 0.0060600 | 0.0060600 | 0.0060600 | -7,10E-01 | 1,98E-02  |
| 19774 | -0.00040100 | -0.00040100 | -0.00040100 | -0.00040100 | -2,12E-01 | 8,21E-03  | 197.735.234.375.000 | 0.0058400 | 0.0058400 | 0.0058400 | 0.0058400 | -5,92E-01 | 4,91E-03  |
| 19777 | -0.00045200 | -0.00045200 | -0.00045200 | -0.00045200 | -2,19E-01 | -1,22E-02 | 197.774.863.281.250 | 0.0055800 | 0.0055800 | 0.0055800 | 0.0055800 | -6,70E-01 | 1,28E-02  |
| 19781 | -0.00057400 | -0.00057400 | -0.00057400 | -0.00057400 | -3,08E-01 | 1,81E-03  | 197.814.511.718.750 | 0.0053100 | 0.0053100 | 0.0053100 | 0.0053100 | -4,91E-01 | 2,30E-03  |
| 19786 | -0.00070000 | -0.00070000 | -0.00070000 | -0.00070000 | -2,04E-01 | 2,05E-02  | 197.855.214.843.750 | 0.0051900 | 0.0051900 | 0.0051900 | 0.0051900 | -6,52E-01 | -2,11E-02 |
| 19789 | -0.00073800 | -0.00073800 | -0.00073800 | -0.00073800 | -1,43E-01 | 3,69E-03  | 197.894.902.343.750 | 0.0047800 | 0.0047800 | 0.0047800 | 0.0047800 | -6,61E-01 | 1,32E-02  |
| 19793 | -0.00081400 | -0.00081400 | -0.00081400 | -0.00081400 | -1,75E-01 | 5,24E-04  | 197.934.589.843.750 | 0.0046600 | 0.0046600 | 0.0046600 | 0.0046600 | -5,47E-01 | -1,21E-02 |
| 19798 | -0.00087900 | -0.00087900 | -0.00087900 | -0.00087900 | -1,39E-01 | 2,95E-03  | 197.975.351.562.500 | 0.0043400 | 0.0043400 | 0.0043400 | 0.0043400 | -7,58E-01 | -1,43E-02 |
| 19802 | -0.00092500 | -0.00092500 | -0.00092500 | -0.00092500 | -1,51E-01 | -3,66E-03 | 198.015.078.125.000 | 0.0040500 | 0.0040500 | 0.0040500 | 0.0040500 | -6,62E-01 | 2,95E-02  |
| 19805 | -0.00099900 | -0.00099900 | -0.00099900 | -0.00099900 | -1,68E-01 | -3,89E-03 | 198.054.824.218.750 | 0.0038200 | 0.0038200 | 0.0038200 | 0.0038200 | -5,24E-01 | 1,55E-02  |
| 19809 | -0.00106000 | -0.00106000 | -0.00106000 | -0.00106000 | -1,82E-01 | -6,87E-03 | 198.094.589.843.750 | 0.0036300 | 0.0036300 | 0.0036300 | 0.0036300 | -5,38E-01 | -4,66E-03 |
| 19814 | -0.00115000 | -0.00115000 | -0.00115000 | -0.00115000 | -2,24E-01 | 8,00E-03  | 198.135.410.156.250 | 0.0033800 | 0.0033800 | 0.0033800 | 0.0033800 | -5,61E-01 | -2,73E-02 |
| 19818 | -0.00124000 | -0.00124000 | -0.00124000 | -0.00124000 | -1,18E-01 | 1,58E-02  | 198.175.214.843.750 | 0.0031800 | 0.0031800 | 0.0031800 | 0.0031800 | -7,58E-01 | -1,70E-02 |

|       |            |            |            |            |           |           |                     |            |            |            |            |           |           |
|-------|------------|------------|------------|------------|-----------|-----------|---------------------|------------|------------|------------|------------|-----------|-----------|
| 19822 | -0.0012400 | -0.0012400 | -0.0012400 | -0.0012400 | -9,79E-02 | 3,85E-03  | 198.215.019.531.250 | 0.0027800  | 0.0027800  | 0.0027800  | 0.0027800  | -6,97E-01 | 1,64E-02  |
| 19825 | -0.0013200 | -0.0013200 | -0.0013200 | -0.0013200 | -8,69E-02 | 1,39E-02  | 198.254.843.750.000 | 0.0026300  | 0.0026300  | 0.0026300  | 0.0026300  | -6,27E-01 | 1,52E-02  |
| 19829 | -0.0013100 | -0.0013100 | -0.0013100 | -0.0013100 | 1,25E-02  | 1,89E-03  | 198.294.687.500.000 | 0.0022800  | 0.0022800  | 0.0022800  | 0.0022800  | -5,75E-01 | 3,05E-02  |
| 19833 | -0.0013100 | -0.0013100 | -0.0013100 | -0.0013100 | -7,18E-02 | -1,49E-02 | 198.334.550.781.250 | 0.0021700  | 0.0021700  | 0.0021700  | 0.0021700  | -3,84E-01 | 1,34E-02  |
| 19838 | -0.0013700 | -0.0013700 | -0.0013700 | -0.0013700 | -1,08E-01 | 4,16E-03  | 198.375.468.750.000 | 0.0019700  | 0.0019700  | 0.0019700  | 0.0019700  | -4,67E-01 | -1,70E-02 |
| 19842 | -0.0013900 | -0.0013900 | -0.0013900 | -0.0013900 | -3,82E-02 | 7,20E-03  | 198.415.371.093.750 | 0.0017900  | 0.0017900  | 0.0017900  | 0.0017900  | -5,21E-01 | -2,41E-02 |
| 19846 | -0.0014000 | -0.0014000 | -0.0014000 | -0.0014000 | -5,02E-02 | -8,46E-03 | 198.455.273.437.500 | 0.0015500  | 0.0015500  | 0.0015500  | 0.0015500  | -6,60E-01 | -4,20E-03 |
| 19850 | -0.0014300 | -0.0014300 | -0.0014300 | -0.0014300 | -1,06E-01 | 4,92E-03  | 198.495.195.312.500 | 0.0012600  | 0.0012600  | 0.0012600  | 0.0012600  | -5,55E-01 | 4,58E-02  |
| 19854 | -0.0014800 | -0.0014800 | -0.0014800 | -0.0014800 | -1,09E-02 | 2,32E-02  | 198.535.136.718.750 | 0.0011100  | 0.0011100  | 0.0011100  | 0.0011100  | -2,94E-01 | 3,41E-02  |
| 19858 | -0.0014400 | -0.0014400 | -0.0014400 | -0.0014400 | 8,00E-02  | 9,57E-03  | 198.575.097.656.250 | 0.0010300  | 0.0010300  | 0.0010300  | 0.0010300  | -2,82E-01 | -1,64E-02 |
| 19862 | -0.0014200 | -0.0014200 | -0.0014200 | -0.0014200 | 6,57E-02  | -1,45E-03 | 198.615.078.125.000 | 0.00088400 | 0.00088400 | 0.00088400 | 0.00088400 | -4,25E-01 | -8,18E-03 |
| 19866 | -0.0013900 | -0.0013900 | -0.0013900 | -0.0013900 | 6,83E-02  | 9,12E-03  | 198.655.058.593.750 | 0.00069000 | 0.00069000 | 0.00069000 | 0.00069000 | -3,48E-01 | -2,58E-02 |
| 19870 | -0.0013600 | -0.0013600 | -0.0013600 | -0.0013600 | 1,39E-01  | 7,09E-03  | 198.695.078.125.000 | 0.00060600 | 0.00060600 | 0.00060600 | 0.00060600 | -6,32E-01 | -3,08E-02 |
| 19874 | -0.0012800 | -0.0012800 | -0.0012800 | -0.0012800 | 1,25E-01  | -2,68E-03 | 198.735.097.656.250 | 0.00018500 | 0.00018500 | 0.00018500 | 0.00018500 | -5,94E-01 | 3,62E-02  |
| 19878 | -0.0012600 | -0.0012600 | -0.0012600 | -0.0012600 | 1,17E-01  | 7,95E-03  | 198.775.136.718.750 | 0.00013100 | 0.00013100 | 0.00013100 | 0.00013100 | -3,42E-01 | -2,12E-03 |
| 19882 | -0.0011900 | -0.0011900 | -0.0011900 | -0.0011900 | 1,89E-01  | 1,61E-02  | 198.815.195.312.500 | -8,92E-01  | -8,92E-01  | -8,92E-01  | -8,92E-01  | -6,11E-01 | 1,56E-03  |

|       |             |             |             |             |            |          |                     |             |             |             |             |            |           |
|-------|-------------|-------------|-------------|-------------|------------|----------|---------------------|-------------|-------------|-------------|-------------|------------|-----------|
| 19886 | -0.0011100  | -0.0011100  | -0.0011100  | -0.0011100  | 2,46E-01   | 1,73E-02 | 198.855.253.906.250 | -0.00035900 | -0.00035900 | -0.00035900 | -0.00035900 | -3,29E-01  | 8,79E-02  |
| 19890 | -0.00098900 | -0.00098900 | -0.00098900 | -0.00098900 | 3,28E-01   | 8,16E-03 | 198.895.351.562.500 | -0.00035300 | -0.00035300 | -0.00035300 | -0.00035300 | 9,40E-02   | 3,65E-02  |
| 19894 | -0.00084900 | -0.00084900 | -0.00084900 | -0.00084900 | 3,12E-01   | 6,57E-03 | 198.935.449.218.750 | -0.00028300 | -0.00028300 | -0.00028300 | -0.00028300 | -3,63E-02  | -5,18E-02 |
| 19897 | -0.00074200 | -0.00074200 | -0.00074200 | -0.00074200 | 3,80E-01   | 2,01E-02 | 198.974.511.718.750 | -0.00038200 | -0.00038200 | -0.00038200 | -0.00038200 | -3,16E-01  | -1,89E-02 |
| 19901 | -0.00054800 | -0.00054800 | -0.00054800 | -0.00054800 | 4,71E-01   | 1,96E-02 | 199.014.667.968.750 | -0.00053300 | -0.00053300 | -0.00053300 | -0.00053300 | -1,86E-01  | 4,09E-02  |
| 19905 | -0.00036400 | -0.00036400 | -0.00036400 | -0.00036400 | 5,37E-01   | 1,79E-02 | 199.054.804.687.500 | -0.00053100 | -0.00053100 | -0.00053100 | -0.00053100 | 1,26E-02   | 2,35E-02  |
| 19909 | -0.00011700 | -0.00011700 | -0.00011700 | -0.00011700 | 6,15E-01   | 2,15E-02 | 199.094.980.468.750 | -0.00052300 | -0.00052300 | -0.00052300 | -0.00052300 | 2,77E-03   | 9,67E-03  |
| 19914 | 0.00013000  | 0.00013000  | 0.00013000  | 0.00013000  | 7,10E-01   | 1,58E-02 | 199.135.175.781.250 | -0.00052900 | -0.00052900 | -0.00052900 | -0.00052900 | 9,03E-02   | 1,21E-02  |
| 19918 | 0.00045400  | 0.00045400  | 0.00045400  | 0.00045400  | 7,41E-01   | 1,53E-02 | 199.175.371.093.750 | -0.00045100 | -0.00045100 | -0.00045100 | -0.00045100 | 1,00E-01   | -4,18E-03 |
| 19921 | 0.00071800  | 0.00071800  | 0.00071800  | 0.00071800  | 8,32E-01   | 3,40E-02 | 199.214.531.250.000 | -0.00044900 | -0.00044900 | -0.00044900 | -0.00044900 | 5,72E-02   | 2,89E-02  |
| 19925 | 0.0011100   | 0.0011100   | 0.0011100   | 0.0011100   | 0.00010100 | 4,48E-02 | 199.254.765.625.000 | -0.00040500 | -0.00040500 | -0.00040500 | -0.00040500 | 3,30E-01   | 4,49E-02  |
| 19930 | 0.0015300   | 0.0015300   | 0.0015300   | 0.0015300   | 0.00011900 | 4,27E-02 | 199.295.019.531.250 | -0.00018400 | -0.00018400 | -0.00018400 | -0.00018400 | 4,19E-01   | 2,54E-02  |
| 19934 | 0.0020700   | 0.0020700   | 0.0020700   | 0.0020700   | 0.00013600 | 4,43E-02 | 199.335.292.968.750 | -6,81E-01   | -6,81E-01   | -6,81E-01   | -6,81E-01   | 5,34E-01   | 1,87E-02  |
| 19937 | 0.0026100   | 0.0026100   | 0.0026100   | 0.0026100   | 0.00015400 | 5,91E-02 | 199.374.511.718.750 | 0.00024100  | 0.00024100  | 0.00024100  | 0.00024100  | 5,67E-01   | 4,95E-03  |
| 19941 | 0.0033000   | 0.0033000   | 0.0033000   | 0.0033000   | 0.00018200 | 7,27E-02 | 199.414.804.687.500 | 0.00038300  | 0.00038300  | 0.00038300  | 0.00038300  | 5,74E-01   | 7,33E-02  |
| 19946 | 0.0040800   | 0.0040800   | 0.0040800   | 0.0040800   | 0.00021300 | 8,26E-02 | 199.455.136.718.750 | 0.00070300  | 0.00070300  | 0.00070300  | 0.00070300  | 0.00011600 | 1,26E-01  |
| 19950 | 0.0050200   | 0.0050200   | 0.0050200   | 0.0050200   | 0.00024900 | 1,05E-01 | 199.495.468.750.000 | 0.0013200   | 0.0013200   | 0.0013200   | 0.0013200   | 0.00015900 | 1,20E-01  |

|       |           |           |           |           |            |            |                     |           |           |           |           |            |            |
|-------|-----------|-----------|-----------|-----------|------------|------------|---------------------|-----------|-----------|-----------|-----------|------------|------------|
| 19953 | 0.0060600 | 0.0060600 | 0.0060600 | 0.0060600 | 0.00029700 | 1,31E-01   | 199.534.746.093.750 | 0.0019700 | 0.0019700 | 0.0019700 | 0.0019700 | 0.00021200 | 1,35E-01   |
| 19958 | 0.0073800 | 0.0073800 | 0.0073800 | 0.0073800 | 0.00035300 | 1,61E-01   | 199.575.117.187.500 | 0.0030000 | 0.0030000 | 0.0030000 | 0.0030000 | 0.00026600 | 1,44E-01   |
| 19962 | 0.0089200 | 0.0089200 | 0.0089200 | 0.0089200 | 0.00042600 | 2,18E-01   | 199.615.507.812.500 | 0.0041200 | 0.0041200 | 0.0041200 | 0.0041200 | 0.00032800 | 1,99E-01   |
| 19965 | 0.010800  | 0.010800  | 0.010800  | 0.010800  | 0.00052700 | 3,02E-01   | 199.654.843.750.000 | 0.0056200 | 0.0056200 | 0.0056200 | 0.0056200 | 0.00042500 | 3,21E-01   |
| 19970 | 0.013100  | 0.013100  | 0.013100  | 0.013100  | 0.00066700 | 4,37E-01   | 199.695.253.906.250 | 0.0075100 | 0.0075100 | 0.0075100 | 0.0075100 | 0.00058400 | 4,28E-01   |
| 19973 | 0.016100  | 0.016100  | 0.016100  | 0.016100  | 0.00087600 | 6,49E-01   | 199.734.628.906.250 | 0.010300  | 0.010300  | 0.010300  | 0.010300  | 0.00076600 | 6,20E-01   |
| 19978 | 0.020100  | 0.020100  | 0.020100  | 0.020100  | 0.0011900  | 0.00010400 | 199.775.078.125.000 | 0.013600  | 0.013600  | 0.013600  | 0.013600  | 0.0010800  | 0.00011700 |
| 19981 | 0.025600  | 0.025600  | 0.025600  | 0.025600  | 0.0017100  | 0.00018700 | 199.814.472.656.250 | 0.018900  | 0.018900  | 0.018900  | 0.018900  | 0.0017000  | 0.00022300 |
| 19985 | 0.033700  | 0.033700  | 0.033700  | 0.033700  | 0.0026800  | 0.00021300 | 199.854.960.937.500 | 0.027200  | 0.027200  | 0.027200  | 0.027200  | 0.0028600  | 0.00025600 |
| 19990 | 0.047200  | 0.047200  | 0.047200  | 0.047200  | 0.0034300  | 0.00050100 | 199.895.449.218.750 | 0.042000  | 0.042000  | 0.042000  | 0.042000  | 0.0037700  | 0.00063400 |
| 19990 | 0.048400  | 0.048400  | 0.048400  | 0.048400  | 0.0048100  | 0.0024300  | 199.897.578.125.000 | 0.043300  | 0.043300  | 0.043300  | 0.043300  | 0.0055600  | 0.0037900  |
| 19990 | 0.049800  | 0.049800  | 0.049800  | 0.049800  | 0.0047300  | 0.00030800 | 199.900.781.250.000 | 0.045000  | 0.045000  | 0.045000  | 0.045000  | 0.0057900  | 0.00032600 |
| 19990 | 0.051400  | 0.051400  | 0.051400  | 0.051400  | 0.0050100  | 0.00094900 | 199.903.984.375.000 | 0.047000  | 0.047000  | 0.047000  | 0.047000  | 0.0057700  | 0.00061600 |
| 19991 | 0.053000  | 0.053000  | 0.053000  | 0.053000  | 0.0053400  | 0.0011300  | 199.907.167.968.750 | 0.048700  | 0.048700  | 0.048700  | 0.048700  | 0.0061900  | 0.0021000  |
| 19991 | 0.054800  | 0.054800  | 0.054800  | 0.054800  | 0.0057300  | 0.0013600  | 199.910.371.093.750 | 0.051000  | 0.051000  | 0.051000  | 0.051000  | 0.0071100  | 0.0026200  |
| 19991 | 0.056100  | 0.056100  | 0.056100  | 0.056100  | 0.0060600  | 0.0011700  | 199.912.500.000.000 | 0.052500  | 0.052500  | 0.052500  | 0.052500  | 0.0075800  | 0.0021900  |

|       |          |          |          |          |           |           |                     |          |          |          |          |           |           |
|-------|----------|----------|----------|----------|-----------|-----------|---------------------|----------|----------|----------|----------|-----------|-----------|
| 19992 | 0.058000 | 0.058000 | 0.058000 | 0.058000 | 0.0063500 | 0.0010700 | 199.915.703.125.000 | 0.055000 | 0.055000 | 0.055000 | 0.055000 | 0.0082800 | 0.0019700 |
| 19992 | 0.060100 | 0.060100 | 0.060100 | 0.060100 | 0.0067500 | 0.0010100 | 199.918.906.250.000 | 0.057800 | 0.057800 | 0.057800 | 0.057800 | 0.0088500 | 0.0016500 |
| 19992 | 0.062300 | 0.062300 | 0.062300 | 0.062300 | 0.0070000 | 0.0012900 | 199.922.109.375.000 | 0.060700 | 0.060700 | 0.060700 | 0.060700 | 0.0093400 | 0.0027300 |
| 19993 | 0.064600 | 0.064600 | 0.064600 | 0.064600 | 0.0075700 | 0.0021800 | 199.925.292.968.750 | 0.063700 | 0.063700 | 0.063700 | 0.063700 | 0.010600  | 0.0040700 |
| 19993 | 0.067200 | 0.067200 | 0.067200 | 0.067200 | 0.0084000 | 0.0021700 | 199.928.496.093.750 | 0.067400 | 0.067400 | 0.067400 | 0.067400 | 0.011900  | 0.0039300 |
| 19993 | 0.069100 | 0.069100 | 0.069100 | 0.069100 | 0.0087300 | 0.0016400 | 199.930.625.000.000 | 0.070100 | 0.070100 | 0.070100 | 0.070100 | 0.012700  | 0.0034400 |
| 19993 | 0.071800 | 0.071800 | 0.071800 | 0.071800 | 0.0092700 | 0.0026200 | 199.933.828.125.000 | 0.074200 | 0.074200 | 0.074200 | 0.074200 | 0.013800  | 0.0050200 |
| 19994 | 0.075000 | 0.075000 | 0.075000 | 0.075000 | 0.010400  | 0.0026300 | 199.937.031.250.000 | 0.078900 | 0.078900 | 0.078900 | 0.078900 | 0.015900  | 0.0058400 |
| 19994 | 0.078500 | 0.078500 | 0.078500 | 0.078500 | 0.011000  | 0.0021200 | 199.940.234.375.000 | 0.084400 | 0.084400 | 0.084400 | 0.084400 | 0.017500  | 0.0050100 |
| 19994 | 0.082000 | 0.082000 | 0.082000 | 0.082000 | 0.011800  | 0.0040200 | 199.943.437.500.000 | 0.090200 | 0.090200 | 0.090200 | 0.090200 | 0.019100  | 0.0068400 |
| 19995 | 0.084800 | 0.084800 | 0.084800 | 0.084800 | 0.013100  | 0.0036400 | 199.945.566.406.250 | 0.094600 | 0.094600 | 0.094600 | 0.094600 | 0.021200  | 0.0067800 |
| 19995 | 0.089000 | 0.089000 | 0.089000 | 0.089000 | 0.013700  | 0.0031400 | 199.948.769.531.250 | 0.10143  | 0.10143  | 0.10143  | 0.10143  | 0.022700  | 0.0068400 |
| 19995 | 0.093500 | 0.093500 | 0.093500 | 0.093500 | 0.015100  | 0.0050600 | 199.951.953.125.000 | 0.10907  | 0.10907  | 0.10907  | 0.10907  | 0.025500  | 0.0088700 |
| 19996 | 0.098700 | 0.098700 | 0.098700 | 0.098700 | 0.016900  | 0.0058700 | 199.955.156.250.000 | 0.11774  | 0.11774  | 0.11774  | 0.11774  | 0.028400  | 0.0082200 |
| 19996 | 0.10439  | 0.10439  | 0.10439  | 0.10439  | 0.018900  | 0.0069100 | 199.958.359.375.000 | 0.12726  | 0.12726  | 0.12726  | 0.12726  | 0.030800  | 0.0084900 |
| 19996 | 0.10873  | 0.10873  | 0.10873  | 0.10873  | 0.020600  | 0.0058200 | 199.960.488.281.250 | 0.13415  | 0.13415  | 0.13415  | 0.13415  | 0.032900  | 0.0068500 |
| 19996 | 0.11539  | 0.11539  | 0.11539  | 0.11539  | 0.022000  | 0.0066600 | 199.963.691.406.250 | 0.14480  | 0.14480  | 0.14480  | 0.14480  | 0.034400  | 0.0058000 |

|       |         |         |         |         |          |            |                     |         |         |         |         |          |             |
|-------|---------|---------|---------|---------|----------|------------|---------------------|---------|---------|---------|---------|----------|-------------|
| 19997 | 0.12279 | 0.12279 | 0.12279 | 0.12279 | 0.024900 | 0.0095500  | 199.966.894.531.250 | 0.15619 | 0.15619 | 0.15619 | 0.15619 | 0.036600 | 0.0065000   |
| 19997 | 0.13134 | 0.13134 | 0.13134 | 0.13134 | 0.028100 | 0.0100000  | 199.970.097.656.250 | 0.16828 | 0.16828 | 0.16828 | 0.16828 | 0.038600 | 0.0053100   |
| 19997 | 0.14080 | 0.14080 | 0.14080 | 0.14080 | 0.031300 | 0.012100   | 199.973.300.781.250 | 0.18093 | 0.18093 | 0.18093 | 0.18093 | 0.040000 | 0.0067600   |
| 19998 | 0.15139 | 0.15139 | 0.15139 | 0.15139 | 0.035900 | 0.017000   | 199.976.503.906.250 | 0.19389 | 0.19389 | 0.19389 | 0.19389 | 0.042900 | 0.0090800   |
| 19998 | 0.15991 | 0.15991 | 0.15991 | 0.15991 | 0.040400 | 0.013600   | 199.978.632.812.500 | 0.20382 | 0.20382 | 0.20382 | 0.20382 | 0.044900 | 0.0018800   |
| 19998 | 0.17296 | 0.17296 | 0.17296 | 0.17296 | 0.043100 | 0.014500   | 199.981.835.937.500 | 0.21785 | 0.21785 | 0.21785 | 0.21785 | 0.043900 | 0.0013800   |
| 19999 | 0.18755 | 0.18755 | 0.18755 | 0.18755 | 0.049700 | 0.021000   | 199.985.039.062.500 | 0.23198 | 0.23198 | 0.23198 | 0.23198 | 0.045700 | 0.0052100   |
| 19999 | 0.20466 | 0.20466 | 0.20466 | 0.20466 | 0.056500 | 0.017500   | 199.988.222.656.250 | 0.24704 | 0.24704 | 0.24704 | 0.24704 | 0.047300 | 0.0024600   |
| 19999 | 0.22365 | 0.22365 | 0.22365 | 0.22365 | 0.060800 | 0.021100   | 199.991.425.781.250 | 0.26219 | 0.26219 | 0.26219 | 0.26219 | 0.047300 | 0.00061600  |
| 19999 | 0.23721 | 0.23721 | 0.23721 | 0.23721 | 0.067800 | 0.027800   | 199.993.574.218.750 | 0.27235 | 0.27235 | 0.27235 | 0.27235 | 0.047600 | 0.0029900   |
| 20000 | 0.25992 | 0.25992 | 0.25992 | 0.25992 | 0.075700 | 0.021700   | 199.996.777.343.750 | 0.28765 | 0.28765 | 0.28765 | 0.28765 | 0.048900 | 0.0018800   |
| 20000 | 0.28560 | 0.28560 | 0.28560 | 0.28560 | 0.081600 | 0.015100   | 199.999.960.937.500 | 0.30361 | 0.30361 | 0.30361 | 0.30361 | 0.048800 | -0.0021000  |
| 20000 | 0.31200 | 0.31200 | 0.31200 | 0.31200 | 0.085300 | 0.014500   | 200.003.164.062.500 | 0.31879 | 0.31879 | 0.31879 | 0.31879 | 0.047600 | -0.00040200 |
| 20001 | 0.34031 | 0.34031 | 0.34031 | 0.34031 | 0.091000 | 0.0082300  | 200.006.367.187.500 | 0.33411 | 0.33411 | 0.33411 | 0.33411 | 0.048500 | -0.0020500  |
| 20001 | 0.36076 | 0.36076 | 0.36076 | 0.36076 | 0.089800 | -0.0053000 | 200.008.515.625.000 | 0.34480 | 0.34480 | 0.34480 | 0.34480 | 0.046500 | -0.0067200  |
| 20001 | 0.38815 | 0.38815 | 0.38815 | 0.38815 | 0.088100 | -0.0022300 | 200.011.699.218.750 | 0.35888 | 0.35888 | 0.35888 | 0.35888 | 0.045000 | -0.0020300  |

|       |         |         |         |         |            |            |                     |         |         |         |         |          |             |
|-------|---------|---------|---------|---------|------------|------------|---------------------|---------|---------|---------|---------|----------|-------------|
| 20001 | 0.41699 | 0.41699 | 0.41699 | 0.41699 | 0.088300   | -0.0052400 | 200.014.902.343.750 | 0.37349 | 0.37349 | 0.37349 | 0.37349 | 0.045200 | 7,32E-01    |
| 20002 | 0.44477 | 0.44477 | 0.44477 | 0.44477 | 0.084800   | -0.014200  | 200.018.105.468.750 | 0.38785 | 0.38785 | 0.38785 | 0.38785 | 0.045000 | -0.00053000 |
| 20002 | 0.47133 | 0.47133 | 0.47133 | 0.47133 | 0.079300   | -0.017600  | 200.021.308.593.750 | 0.40233 | 0.40233 | 0.40233 | 0.40233 | 0.044800 | -0.00074500 |
| 20002 | 0.49550 | 0.49550 | 0.49550 | 0.49550 | 0.073500   | -0.026000  | 200.024.511.718.750 | 0.41655 | 0.41655 | 0.41655 | 0.41655 | 0.044500 | -0.0013100  |
| 20003 | 0.51052 | 0.51052 | 0.51052 | 0.51052 | 0.065400   | -0.031600  | 200.026.640.625.000 | 0.42607 | 0.42607 | 0.42607 | 0.42607 | 0.044100 | -0.0024000  |
| 20003 | 0.53034 | 0.53034 | 0.53034 | 0.53034 | 0.056700   | -0.028100  | 200.029.843.750.000 | 0.44007 | 0.44007 | 0.44007 | 0.44007 | 0.043200 | -0.0025300  |
| 20003 | 0.54686 | 0.54686 | 0.54686 | 0.54686 | 0.047400   | -0.026800  | 200.033.046.875.000 | 0.45379 | 0.45379 | 0.45379 | 0.45379 | 0.042500 | 0.0015200   |
| 20004 | 0.56071 | 0.56071 | 0.56071 | 0.56071 | 0.039500   | -0.024400  | 200.036.250.000.000 | 0.46733 | 0.46733 | 0.46733 | 0.46733 | 0.044200 | 0.0059900   |
| 20004 | 0.57214 | 0.57214 | 0.57214 | 0.57214 | 0.031800   | -0.037500  | 200.039.453.125.000 | 0.48209 | 0.48209 | 0.48209 | 0.48209 | 0.046400 | 0.00047700  |
| 20004 | 0.57772 | 0.57772 | 0.57772 | 0.57772 | 0.019500   | -0.041900  | 200.041.601.562.500 | 0.49213 | 0.49213 | 0.49213 | 0.49213 | 0.044500 | -0.0031000  |
| 20004 | 0.58256 | 0.58256 | 0.58256 | 0.58256 | 0.0093600  | -0.035100  | 200.044.804.687.500 | 0.50589 | 0.50589 | 0.50589 | 0.50589 | 0.044700 | 0.0020900   |
| 20005 | 0.58372 | 0.58372 | 0.58372 | 0.58372 | -0.0030200 | -0.038400  | 200.048.007.812.500 | 0.52078 | 0.52078 | 0.52078 | 0.52078 | 0.045800 | -6,90E-01   |
| 20005 | 0.58062 | 0.58062 | 0.58062 | 0.58062 | -0.015300  | -0.035500  | 200.051.210.937.500 | 0.53526 | 0.53526 | 0.53526 | 0.53526 | 0.044700 | -0.00024400 |
| 20005 | 0.57395 | 0.57395 | 0.57395 | 0.57395 | -0.025700  | -0.044100  | 200.054.414.062.500 | 0.54936 | 0.54936 | 0.54936 | 0.54936 | 0.045700 | 0.0056000   |
| 20006 | 0.56690 | 0.56690 | 0.56690 | 0.56690 | -0.038800  | -0.038800  | 200.056.542.968.750 | 0.55960 | 0.55960 | 0.55960 | 0.55960 | 0.047600 | 0.0011700   |
| 20006 | 0.55324 | 0.55324 | 0.55324 | 0.55324 | -0.046500  | -0.024500  | 200.059.746.093.750 | 0.57480 | 0.57480 | 0.57480 | 0.57480 | 0.046300 | -0.0012200  |
| 20006 | 0.53710 | 0.53710 | 0.53710 | 0.53710 | -0.054500  | -0.020300  | 200.062.949.218.750 | 0.58927 | 0.58927 | 0.58927 | 0.58927 | 0.046900 | 0.0038500   |



|       |         |          |         |          |            |            |                     |         |         |         |         |          |             |
|-------|---------|----------|---------|----------|------------|------------|---------------------|---------|---------|---------|---------|----------|-------------|
| 20007 | 0.51837 | 0.51837  | 0.51837 | 0.51837  | -0.059500  | -0.0094200 | 200.066.152.343.750 | 0.60479 | 0.60479 | 0.60479 | 0.60479 | 0.048800 | 0.0046500   |
| 20007 | 0.49898 | 0.49898  | 0.49898 | 0.49898  | -0.060500  | 0.0051700  | 200.069.355.468.750 | 0.62053 | 0.62053 | 0.62053 | 0.62053 | 0.049800 | 0.0019400   |
| 20007 | 0.48612 | 0.48612  | 0.48612 | 0.48612  | -0.056700  | 0.017300   | 200.071.484.375.000 | 0.63136 | 0.63136 | 0.63136 | 0.63136 | 0.049800 | 0.00042200  |
| 20007 | 0.46875 | 0.46875  | 0.46875 | 0.46875  | -0.051300  | 0.017600   | 200.074.687.500.000 | 0.64706 | 0.64706 | 0.64706 | 0.64706 | 0.050100 | 0.0051300   |
| 20008 | 0.45324 | 0.45324  | 0.45324 | 0.45324  | -0.045500  | 0.022200   | 200.077.890.625.000 | 0.66345 | 0.66345 | 0.66345 | 0.66345 | 0.053100 | 0.0080700   |
| 20008 | 0.43965 | 0.43965  | 0.43965 | 0.43965  | -0.037100  | 0.028500   | 200.081.093.750.000 | 0.68103 | 0.68103 | 0.68103 | 0.68103 | 0.055200 | 0.0043600   |
| 20008 | 0.42948 | 0.42948  | 0.42948 | 0.42948  | -0.027200  | 0.026500   | 200.084.296.875.000 | 0.69885 | 0.69885 | 0.69885 | 0.69885 | 0.055900 | 0.0055500   |
| 20009 | 0.42219 | 0.42219  | 0.42219 | 0.42219  | -0.020100  | 0.029000   | 200.087.500.000.000 | 0.71685 | 0.71685 | 0.71685 | 0.71685 | 0.058800 | 0.0078200   |
| 20009 | 0.41874 | 0.41874  | 0.41874 | 0.41874  | -0.011700  | 0.028200   | 200.089.648.437.500 | 0.73030 | 0.73030 | 0.73030 | 0.73030 | 0.060100 | -0.00068500 |
| 20009 | 0.41594 | 0.41594  | 0.41594 | 0.41594  | -0.0049700 | 0.021200   | 200.092.851.562.500 | 0.74898 | 0.74898 | 0.74898 | 0.74898 | 0.058400 | 0.00076300  |
| 20010 | 0.41556 | 0.41556  | 0.41556 | 0.41556  | 0.0018600  | 0.020100   | 200.096.054.687.500 | 0.76769 | 0.76769 | 0.76769 | 0.76769 | 0.060500 | 0.0074100   |
| 20010 | 0.41714 | 0.41714  | 0.41714 | 0.41714  | 0.0079300  | 0.016900   | 200.099.257.812.500 | 0.78779 | 0.78779 | 0.78776 | 0.78776 | 0.063200 | 0.0034300   |
| 20010 | 0.42064 | -13.304  | 0.42062 | -13.304  | 0.012700   | 0.019000   | 200.102.460.937.500 | 0.80819 | 0.67245 | 0.80828 | 0.67255 | 0.062700 | -0.0020400  |
| 20010 | 0.42391 | -12.326  | 0.42386 | -12.326  | 0.018100   | 0.017400   | 200.104.589.843.750 | 0.82123 | 0.68565 | 0.82141 | 0.68583 | 0.062100 | -8,97E-01   |
| 20011 | 0.43031 | -10.894  | 0.43024 | -10.895  | 0.022000   | 0.012000   | 200.107.812.500.000 | 0.84140 | 0.70498 | 0.84171 | 0.70529 | 0.062700 | -0.0029000  |
| 20011 | 0.43807 | -0.95214 | 0.43797 | -0.95224 | 0.025800   | 0.011500   | 200.111.015.625.000 | 0.86155 | 0.72351 | 0.86198 | 0.72394 | 0.060200 | -0.0087200  |

|       |         |            |         |            |          |            |                     |         |         |         |         |            |            |
|-------|---------|------------|---------|------------|----------|------------|---------------------|---------|---------|---------|---------|------------|------------|
| 20011 | 0.44684 | -0.82068   | 0.44670 | -0.82082   | 0.029400 | 0.012400   | 200.114.218.750.000 | 0.88000 | 0.74126 | 0.88057 | 0.74182 | 0.057100   | -0.0051800 |
| 20012 | 0.45690 | -0.69447   | 0.45674 | -0.69463   | 0.033700 | 0.013500   | 200.117.421.875.000 | 0.89810 | 0.75830 | 0.89878 | 0.75899 | 0.056900   | -0.0089700 |
| 20012 | 0.46482 | -0.61332   | 0.46464 | -0.61350   | 0.036600 | 0.0099300  | 200.119.550.781.250 | 0.91034 | 0.76926 | 0.91111 | 0.77004 | 0.052300   | -0.015400  |
| 20012 | 0.47640 | -0.49561   | 0.47619 | -0.49583   | 0.039000 | 0.011600   | 200.122.753.906.250 | 0.92599 | 0.78516 | 0.92689 | 0.78606 | 0.048700   | -0.0098200 |
| 20013 | 0.48984 | -0.38254   | 0.48960 | -0.38278   | 0.044000 | 0.014200   | 200.125.957.031.250 | 0.94155 | 0.80044 | 0.94258 | 0.80147 | 0.046000   | -0.010800  |
| 20013 | 0.50471 | -0.27402   | 0.50444 | -0.27430   | 0.048200 | 0.011700   | 200.129.179.687.500 | 0.95559 | 0.81511 | 0.95674 | 0.81626 | 0.041800   | -0.012800  |
| 20013 | 0.52077 | -0.17096   | 0.52047 | -0.17127   | 0.051500 | 0.0098500  | 200.132.382.812.500 | 0.96837 | 0.82904 | 0.96965 | 0.83032 | 0.037800   | -0.019700  |
| 20013 | 0.53216 | -0.10495   | 0.53184 | -0.10527   | 0.053400 | 0.0090700  | 200.134.511.718.750 | 0.97574 | 0.83797 | 0.97710 | 0.83933 | 0.031200   | -0.019900  |
| 20014 | 0.54924 | -0.0095900 | 0.54889 | -0.0099500 | 0.056300 | 0.010900   | 200.137.714.843.750 | 0.98502 | 0.85086 | 0.98651 | 0.85235 | 0.027200   | -0.014300  |
| 20014 | 0.56828 | 0.081600   | 0.56790 | 0.081200   | 0.060400 | 0.0095000  | 200.140.917.968.750 | 0.99317 | 0.86319 | 0.99479 | 0.86481 | 0.022100   | -0.016600  |
| 20014 | 0.58811 | 0.16856    | 0.58770 | 0.16815    | 0.062400 | 0.010400   | 200.144.140.625.000 | 0.99923 | 0.87497 | 10.010  | 0.87671 | 0.016500   | -0.014700  |
| 20015 | 0.60837 | 0.25073    | 0.60793 | 0.25029    | 0.067100 | 0.013300   | 200.147.343.750.000 | 10.038  | 0.88609 | 10.056  | 0.88796 | 0.012700   | -0.017200  |
| 20015 | 0.62389 | 0.30311    | 0.62343 | 0.30265    | 0.069500 | 0.0017000  | 200.149.472.656.250 | 10.060  | 0.89318 | 10.079  | 0.89514 | 0.0073700  | -0.017600  |
| 20015 | 0.64550 | 0.37861    | 0.64501 | 0.37812    | 0.068000 | 0.0016900  | 200.152.675.781.250 | 10.077  | 0.90341 | 10.098  | 0.90549 | 0.0032800  | -0.013200  |
| 20016 | 0.66750 | 0.44988    | 0.66698 | 0.44935    | 0.070600 | 0.0064700  | 200.155.878.906.250 | 10.081  | 0.91307 | 10.103  | 0.91527 | -0.0011000 | -0.012400  |
| 20016 | 0.69084 | 0.51765    | 0.69029 | 0.51710    | 0.072200 | 0.00076500 | 200.159.101.562.500 | 10.070  | 0.92225 | 10.093  | 0.92459 | -0.0047100 | -0.010300  |
| 20016 | 0.71384 | 0.58119    | 0.71326 | 0.58061    | 0.071100 | 0.00024400 | 200.162.304.687.500 | 10.051  | 0.93087 | 10.075  | 0.93333 | -0.0076800 | -0.0098900 |

|       |         |         |         |         |          |            |                     |         |         |         |         |            |            |
|-------|---------|---------|---------|---------|----------|------------|---------------------|---------|---------|---------|---------|------------|------------|
| 20017 | 0.73643 | 0.64123 | 0.73582 | 0.64062 | 0.072300 | 0.0026400  | 200.165.507.812.500 | 10.021  | 0.93902 | 10.047  | 0.94160 | -0.011100  | -0.012100  |
| 20017 | 0.75247 | 0.67907 | 0.75184 | 0.67844 | 0.072500 | -0.0065900 | 200.167.636.718.750 | 0.99916 | 0.94415 | 10.018  | 0.94682 | -0.014200  | -0.0072700 |
| 20017 | 0.77523 | 0.73333 | 0.77457 | 0.73267 | 0.068800 | -0.0091600 | 200.170.859.375.000 | 0.99451 | 0.95152 | 0.99731 | 0.95432 | -0.014900  | -0.0038300 |
| 20017 | 0.79665 | 0.78382 | 0.79596 | 0.78313 | 0.066600 | -0.0071800 | 200.174.062.500.000 | 0.98957 | 0.95838 | 0.99249 | 0.96130 | -0.016600  | -0.0048700 |
| 20018 | 0.81794 | 0.83114 | 0.81723 | 0.83042 | 0.064200 | -0.0077800 | 200.177.265.625.000 | 0.98386 | 0.96482 | 0.98691 | 0.96786 | -0.018100  | -0.0037300 |
| 20018 | 0.83781 | 0.87511 | 0.83706 | 0.87436 | 0.061700 | -0.011500  | 200.180.468.750.000 | 0.97799 | 0.97080 | 0.98117 | 0.97397 | -0.019000  | -0.0018000 |
| 20018 | 0.85093 | 0.90290 | 0.85016 | 0.90213 | 0.058100 | -0.013300  | 200.182.617.187.500 | 0.97369 | 0.97458 | 0.97695 | 0.97784 | -0.019000  | 0.00071300 |
| 20019 | 0.86888 | 0.94174 | 0.86808 | 0.94094 | 0.054500 | -0.011000  | 200.185.820.312.500 | 0.96782 | 0.97988 | 0.97120 | 0.98326 | -0.018600  | 0.0013300  |
| 20019 | 0.88583 | 0.97765 | 0.88500 | 0.97682 | 0.051000 | -0.012800  | 200.189.023.437.500 | 0.96177 | 0.98477 | 0.96528 | 0.98828 | -0.018200  | 0.0030900  |
| 20019 | 0.90157 | 10.108  | 0.90071 | 10.100  | 0.046300 | -0.013200  | 200.192.226.562.500 | 0.95617 | 0.98931 | 0.95980 | 0.99294 | -0.016600  | 0.0049200  |
| 20020 | 0.91551 | 10.412  | 0.91462 | 10.403  | 0.042500 | -0.015700  | 200.195.429.687.500 | 0.95110 | 0.99345 | 0.95486 | 0.99721 | -0.015000  | 0.0076100  |
| 20020 | 0.92431 | 10.601  | 0.92341 | 10.592  | 0.037900 | -0.017800  | 200.197.578.125.000 | 0.94813 | 0.99604 | 0.95197 | 0.99989 | -0.012600  | 0.0084700  |
| 20020 | 0.93579 | 10.861  | 0.93486 | 10.852  | 0.033000 | -0.014800  | 200.200.781.250.000 | 0.94437 | 0.99961 | 0.94834 | 10.036  | -0.010500  | 0.0075300  |
| 20020 | 0.94543 | 11.097  | 0.94447 | 11.088  | 0.028500 | -0.012100  | 200.203.984.375.000 | 0.94142 | 10.028  | 0.94551 | 10.069  | -0.0077600 | 0.0087600  |
| 20021 | 0.95410 | 11.312  | 0.95310 | 11.302  | 0.025200 | -0.0099400 | 200.207.207.031.250 | 0.93938 | 10.058  | 0.94360 | 10.100  | -0.0048600 | 0.0074300  |
| 20021 | 0.96164 | 11.501  | 0.96062 | 11.491  | 0.022100 | -0.014500  | 200.210.410.156.250 | 0.93829 | 10.084  | 0.94264 | 10.128  | -0.0029800 | 0.0090000  |

|       |         |        |         |        |             |             |                     |         |        |         |        |           |             |
|-------|---------|--------|---------|--------|-------------|-------------|---------------------|---------|--------|---------|--------|-----------|-------------|
| 20021 | 0.96586 | 11.616 | 0.96481 | 11.605 | 0.017500    | -0.014000   | 200.212.539.062.500 | 0.93779 | 10.100 | 0.94222 | 10.144 | -5,78E-01 | 0.0092600   |
| 20022 | 0.97100 | 11.772 | 0.96992 | 11.761 | 0.014600    | -0.0091000  | 200.215.761.718.750 | 0.93826 | 10.122 | 0.94282 | 10.167 | 0.0019700 | 0.0059400   |
| 20022 | 0.97521 | 11.907 | 0.97410 | 11.896 | 0.011600    | -0.0096500  | 200.218.964.843.750 | 0.93906 | 10.140 | 0.94374 | 10.187 | 0.0037600 | 0.0060800   |
| 20022 | 0.97847 | 12.024 | 0.97733 | 12.012 | 0.0083800   | -0.0081200  | 200.222.167.968.750 | 0.94067 | 10.157 | 0.94548 | 10.205 | 0.0058700 | 0.0054600   |
| 20023 | 0.98059 | 12.123 | 0.97943 | 12.112 | 0.0064300   | -0.0062300  | 200.225.390.625.000 | 0.94283 | 10.171 | 0.94776 | 10.220 | 0.0072700 | 0.0049200   |
| 20023 | 0.98190 | 12.180 | 0.98072 | 12.168 | 0.0050400   | -0.0065700  | 200.227.519.531.250 | 0.94456 | 10.179 | 0.94957 | 10.229 | 0.0085000 | 0.0032100   |
| 20023 | 0.98328 | 12.252 | 0.98207 | 12.240 | 0.0029200   | -0.0062100  | 200.230.722.656.250 | 0.94736 | 10.189 | 0.95250 | 10.240 | 0.0089800 | 0.0015100   |
| 20023 | 0.98378 | 12.310 | 0.98254 | 12.297 | 0.0010500   | -0.0039800  | 200.233.945.312.500 | 0.95033 | 10.197 | 0.95560 | 10.250 | 0.0094700 | 0.0013600   |
| 20024 | 0.98396 | 12.353 | 0.98269 | 12.340 | 0.00036600  | -0.0017400  | 200.237.148.437.500 | 0.95345 | 10.204 | 0.95884 | 10.258 | 0.0098600 | 0.00057200  |
| 20024 | 0.98402 | 12.384 | 0.98271 | 12.371 | -6,31E-01   | -0.0013900  | 200.240.351.562.500 | 0.95664 | 10.208 | 0.96215 | 10.264 | 0.0098400 | -0.00083000 |
| 20024 | 0.98393 | 12.398 | 0.98260 | 12.385 | -0.00037900 | -0.00089000 | 200.242.500.000.000 | 0.95871 | 10.211 | 0.96432 | 10.267 | 0.0094100 | -0.0022900  |
| 20025 | 0.98381 | 12.410 | 0.98246 | 12.396 | -0.00053900 | -0.00041600 | 200.245.703.125.000 | 0.96167 | 10.213 | 0.96740 | 10.270 | 0.0086100 | -0.0021000  |
| 20025 | 0.98358 | 12.411 | 0.98220 | 12.398 | -0.00064600 | 0.00068900  | 200.248.906.250.000 | 0.96424 | 10.214 | 0.97009 | 10.272 | 0.0080700 | -0.0011500  |
| 20025 | 0.98340 | 12.404 | 0.98199 | 12.390 | -9,61E-01   | 0.0021000   | 200.252.128.906.250 | 0.96686 | 10.213 | 0.97284 | 10.273 | 0.0078700 | -0.0018300  |
| 20026 | 0.98352 | 12.389 | 0.98208 | 12.375 | 0.00070100  | 0.0030100   | 200.255.332.031.250 | 0.96929 | 10.212 | 0.97539 | 10.273 | 0.0068900 | -0.0041900  |
| 20026 | 0.98377 | 12.375 | 0.98231 | 12.361 | 0.0015100   | 0.0034500   | 200.257.480.468.750 | 0.97055 | 10.210 | 0.97673 | 10.272 | 0.0056300 | -0.0036700  |
| 20026 | 0.98433 | 12.350 | 0.98284 | 12.335 | 0.0025400   | 0.0035000   | 200.260.683.593.750 | 0.97230 | 10.207 | 0.97861 | 10.270 | 0.0049300 | -0.0028300  |

|       |         |        |         |        |           |           |                     |         |        |         |        |             |             |
|-------|---------|--------|---------|--------|-----------|-----------|---------------------|---------|--------|---------|--------|-------------|-------------|
| 20026 | 0.98540 | 12.319 | 0.98388 | 12.304 | 0.0037500 | 0.0038000 | 200.263.886.718.750 | 0.97371 | 10.203 | 0.98014 | 10.268 | 0.0038100   | -0.0026300  |
| 20027 | 0.98674 | 12.284 | 0.98519 | 12.268 | 0.0049900 | 0.0047900 | 200.267.109.375.000 | 0.97475 | 10.199 | 0.98131 | 10.265 | 0.0032400   | -0.0021000  |
| 20027 | 0.98861 | 12.246 | 0.98703 | 12.230 | 0.0068300 | 0.0057700 | 200.270.312.500.000 | 0.97579 | 10.194 | 0.98247 | 10.261 | 0.0024700   | -0.0030400  |
| 20027 | 0.99112 | 12.206 | 0.98951 | 12.190 | 0.0086800 | 0.0066200 | 200.273.515.625.000 | 0.97634 | 10.189 | 0.98315 | 10.258 | 0.0012900   | -0.0021000  |
| 20028 | 0.99325 | 12.179 | 0.99162 | 12.162 | 0.010400  | 0.0053700 | 200.275.664.062.500 | 0.97648 | 10.186 | 0.98337 | 10.255 | 0.0013500   | -0.00086900 |
| 20028 | 0.99667 | 12.138 | 0.99501 | 12.121 | 0.011600  | 0.0054100 | 200.278.867.187.500 | 0.97706 | 10.181 | 0.98408 | 10.251 | 0.00082900  | -0.0021100  |
| 20028 | 10.007  | 12.097 | 0.99900 | 12.080 | 0.013800  | 0.0068700 | 200.282.089.843.750 | 0.97701 | 10.176 | 0.98416 | 10.247 | -1,05E-01   | -0.0013900  |
| 20029 | 10.056  | 12.058 | 10.038  | 12.040 | 0.016000  | 0.0060600 | 200.285.292.968.750 | 0.97705 | 10.171 | 0.98432 | 10.244 | -6,06E-01   | 0.00047300  |
| 20029 | 10.109  | 12.018 | 10.092  | 12.001 | 0.017700  | 0.0061200 | 200.288.496.093.750 | 0.97698 | 10.166 | 0.98437 | 10.240 | 0.00029300  | 0.00056300  |
| 20029 | 10.150  | 11.992 | 10.133  | 11.974 | 0.019200  | 0.0050400 | 200.290.644.531.250 | 0.97721 | 10.163 | 0.98468 | 10.237 | 0.00024100  | -0.00075400 |
| 20029 | 10.212  | 11.954 | 10.194  | 11.936 | 0.020400  | 0.0052200 | 200.293.847.656.250 | 0.97710 | 10.158 | 0.98470 | 10.234 | -0.00011100 | 7,76E-01    |
| 20030 | 10.282  | 11.916 | 10.264  | 11.897 | 0.022600  | 0.0067300 | 200.297.070.312.500 | 0.97714 | 10.153 | 0.98486 | 10.230 | 0.00029100  | 0.0018300   |
| 20030 | 10.357  | 11.878 | 10.339  | 11.860 | 0.024700  | 0.0052000 | 200.300.273.437.500 | 0.97729 | 10.148 | 0.98514 | 10.227 | 0.0010600   | 0.0022900   |
| 20030 | 10.441  | 11.841 | 10.422  | 11.822 | 0.025900  | 0.0017700 | 200.303.496.093.750 | 0.97782 | 10.144 | 0.98579 | 10.223 | 0.0017700   | 0.0015600   |
| 20031 | 10.496  | 11.817 | 10.477  | 11.798 | 0.025700  | 0.0013300 | 200.305.625.000.000 | 0.97824 | 10.140 | 0.98629 | 10.221 | 0.0019000   | 0.00065100  |
| 20031 | 10.578  | 11.781 | 10.559  | 11.761 | 0.026700  | 0.0028700 | 200.308.847.656.250 | 0.97884 | 10.136 | 0.98702 | 10.218 | 0.0021100   | 0.0022800   |

|       |        |        |        |        |           |            |                     |         |        |         |        |           |            |
|-------|--------|--------|--------|--------|-----------|------------|---------------------|---------|--------|---------|--------|-----------|------------|
| 20031 | 10.667 | 11.745 | 10.648 | 11.725 | 0.027500  | 0.00042300 | 200.312.050.781.250 | 0.97960 | 10.131 | 0.98790 | 10.214 | 0.0033700 | 0.0031700  |
| 20032 | 10.755 | 11.710 | 10.735 | 11.690 | 0.026900  | 0.00066400 | 200.315.253.906.250 | 0.98099 | 10.127 | 0.98942 | 10.211 | 0.0041400 | 0.0018200  |
| 20032 | 10.841 | 11.675 | 10.820 | 11.655 | 0.028000  | 0.0024800  | 200.318.476.562.500 | 0.98226 | 10.122 | 0.99081 | 10.208 | 0.0045400 | 0.0024900  |
| 20032 | 10.905 | 11.653 | 10.884 | 11.632 | 0.028300  | -0.0027500 | 200.320.605.468.750 | 0.98342 | 10.119 | 0.99206 | 10.206 | 0.0054800 | 0.0027400  |
| 20032 | 10.992 | 11.619 | 10.971 | 11.598 | 0.026500  | -0.0029400 | 200.323.828.125.000 | 0.98519 | 10.115 | 0.99395 | 10.203 | 0.0060000 | 0.0017500  |
| 20033 | 11.075 | 11.586 | 11.054 | 11.565 | 0.026400  | -0.0011600 | 200.327.031.250.000 | 0.98728 | 10.111 | 0.99616 | 10.200 | 0.0066000 | 0.0014900  |
| 20033 | 11.161 | 11.553 | 11.140 | 11.531 | 0.025800  | -0.0037600 | 200.330.253.906.250 | 0.98943 | 10.106 | 0.99844 | 10.197 | 0.0069600 | 0.0015700  |
| 20033 | 11.240 | 11.520 | 11.219 | 11.499 | 0.023900  | -0.0044800 | 200.333.457.031.250 | 0.99175 | 10.102 | 10.009  | 10.194 | 0.0076100 | 0.0022800  |
| 20034 | 11.289 | 11.499 | 11.267 | 11.477 | 0.023400  | -0.0024300 | 200.335.605.468.750 | 0.99351 | 10.099 | 10.027  | 10.192 | 0.0081800 | 0.0023800  |
| 20034 | 11.365 | 11.468 | 11.343 | 11.446 | 0.022700  | -0.0043900 | 200.338.808.593.750 | 0.99613 | 10.095 | 10.055  | 10.189 | 0.0088900 | 0.0013500  |
| 20034 | 11.435 | 11.436 | 11.412 | 11.414 | 0.020500  | -0.0062200 | 200.342.031.250.000 | 0.99922 | 10.091 | 10.087  | 10.186 | 0.0090500 | 0.00023400 |
| 20035 | 11.497 | 11.406 | 11.474 | 11.383 | 0.018700  | -0.0053200 | 200.345.234.375.000 | 10.019  | 10.087 | 10.115  | 10.183 | 0.0090400 | 0.00080000 |
| 20035 | 11.575 | 11.366 | 11.552 | 11.343 | 0.016500  | -0.0048500 | 200.349.531.250.000 | 10.060  | 10.082 | 10.157  | 10.179 | 0.0096500 | 0.00099100 |
| 20035 | 11.657 | 11.317 | 11.633 | 11.293 | 0.014000  | -0.0050400 | 200.354.882.812.500 | 10.112  | 10.075 | 10.212  | 10.175 | 0.0099900 | 0.00081500 |
| 20036 | 11.724 | 11.269 | 11.700 | 11.245 | 0.011100  | -0.0053800 | 200.360.234.375.000 | 10.167  | 10.069 | 10.268  | 10.171 | 0.010500  | 0.00054000 |
| 20037 | 11.776 | 11.223 | 11.752 | 11.198 | 0.0082200 | -0.0054100 | 200.365.585.937.500 | 10.225  | 10.063 | 10.329  | 10.166 | 0.010600  | 9,90E-01   |
| 20037 | 11.812 | 11.178 | 11.787 | 11.153 | 0.0053600 | -0.0051000 | 200.370.937.500.000 | 10.280  | 10.057 | 10.386  | 10.162 | 0.010600  | 0.00012700 |

|       |        |        |        |        |            |             |                     |        |         |        |        |            |             |
|-------|--------|--------|--------|--------|------------|-------------|---------------------|--------|---------|--------|--------|------------|-------------|
| 20038 | 11.833 | 11.134 | 11.808 | 11.108 | 0.0027500  | -0.0041900  | 200.376.308.593.750 | 10.339 | 10.051  | 10.447 | 10.158 | 0.010700   | 0.00020700  |
| 20038 | 11.845 | 11.083 | 11.819 | 11.057 | 0.00041500 | -0.0039200  | 200.382.734.375.000 | 10.406 | 10.044  | 10.517 | 10.154 | 0.010900   | 0.00031900  |
| 20039 | 11.838 | 11.041 | 11.812 | 11.015 | -0.0018700 | -0.0029900  | 200.388.085.937.500 | 10.467 | 10.038  | 10.579 | 10.150 | 0.011100   | -0.00011600 |
| 20039 | 11.823 | 10.993 | 11.796 | 10.966 | -0.0031100 | -0.0019200  | 200.394.511.718.750 | 10.537 | 10.031  | 10.652 | 10.146 | 0.010700   | -0.00080000 |
| 20040 | 11.798 | 10.947 | 11.771 | 10.919 | -0.0043300 | -0.0016200  | 200.400.937.500.000 | 10.605 | 10.025  | 10.722 | 10.142 | 0.010100   | -0.0017700  |
| 20041 | 11.772 | 10.910 | 11.744 | 10.881 | -0.0050200 | -0.00074700 | 200.406.289.062.500 | 10.655 | 10.019  | 10.775 | 10.139 | 0.0086500  | -0.0024500  |
| 20041 | 11.739 | 10.866 | 11.710 | 10.837 | -0.0052100 | 0.00013100  | 200.412.734.375.000 | 10.707 | 10.013  | 10.829 | 10.135 | 0.0071600  | -0.0028600  |
| 20042 | 11.705 | 10.824 | 11.675 | 10.795 | -0.0048500 | 0.00091200  | 200.419.160.156.250 | 10.747 | 10.007  | 10.872 | 10.131 | 0.0049700  | -0.0044100  |
| 20043 | 11.677 | 10.784 | 11.647 | 10.754 | -0.0040400 | 0.00083000  | 200.425.585.937.500 | 10.771 | 10.001  | 10.898 | 10.128 | 0.0015000  | -0.0048000  |
| 20043 | 11.649 | 10.739 | 11.618 | 10.709 | -0.0037000 | 0.00092100  | 200.433.085.937.500 | 10.768 | 0.99943 | 10.898 | 10.124 | -0.0017200 | -0.0048500  |
| 20044 | 11.625 | 10.702 | 11.594 | 10.671 | -0.0027500 | 0.0011300   | 200.439.511.718.750 | 10.747 | 0.99887 | 10.879 | 10.121 | -0.0052500 | -0.0050900  |
| 20045 | 11.610 | 10.661 | 11.578 | 10.629 | -0.0021300 | 0.00056100  | 200.447.011.718.750 | 10.695 | 0.99824 | 10.830 | 10.117 | -0.0088000 | -0.0050800  |
| 20045 | 11.596 | 10.627 | 11.563 | 10.595 | -0.0019700 | 0.00019100  | 200.453.457.031.250 | 10.624 | 0.99771 | 10.761 | 10.114 | -0.012300  | -0.0040800  |
| 20046 | 11.583 | 10.590 | 11.549 | 10.557 | -0.0018600 | -0.00023000 | 200.460.957.031.250 | 10.523 | 0.99711 | 10.663 | 10.111 | -0.014500  | -0.0028000  |
| 20047 | 11.568 | 10.554 | 11.534 | 10.520 | -0.0023200 | -0.00085800 | 200.468.457.031.250 | 10.407 | 0.99654 | 10.550 | 10.108 | -0.016500  | -0.0018400  |
| 20048 | 11.548 | 10.520 | 11.513 | 10.486 | -0.0031500 | -0.0012600  | 200.475.976.562.500 | 10.275 | 0.99598 | 10.420 | 10.106 | -0.017300  | 9.59E-01    |

|       |        |        |        |        |            |             |                     |         |         |         |        |             |             |
|-------|--------|--------|--------|--------|------------|-------------|---------------------|---------|---------|---------|--------|-------------|-------------|
| 20048 | 11.520 | 10.488 | 11.485 | 10.453 | -0.0042000 | -0.0015700  | 200.483.476.562.500 | 10.148  | 0.99543 | 10.296  | 10.103 | -0.016400   | 0.0013000   |
| 20049 | 11.485 | 10.458 | 11.449 | 10.422 | -0.0055000 | -0.0019800  | 200.490.976.562.500 | 10.029  | 0.99491 | 10.180  | 10.101 | -0.015300   | 0.0020300   |
| 20050 | 11.438 | 10.429 | 11.401 | 10.393 | -0.0071700 | -0.0019200  | 200.498.496.093.750 | 0.99178 | 0.99440 | 10.072  | 10.099 | -0.013300   | 0.0024200   |
| 20051 | 11.369 | 10.399 | 11.332 | 10.361 | -0.0085900 | -0.0019700  | 200.507.070.312.500 | 0.98138 | 0.99384 | 0.99716 | 10.096 | -0.011400   | 0.0027300   |
| 20051 | 11.300 | 10.374 | 11.262 | 10.336 | -0.010300  | -0.0017300  | 200.514.570.312.500 | 0.97347 | 0.99337 | 0.98953 | 10.094 | -0.0089600  | 0.0029600   |
| 20052 | 11.203 | 10.347 | 11.164 | 10.308 | -0.011400  | -0.00091700 | 200.523.164.062.500 | 0.96697 | 0.99285 | 0.98336 | 10.092 | -0.0066400  | 0.0028300   |
| 20053 | 11.117 | 10.325 | 11.077 | 10.286 | -0.011800  | -0.00040800 | 200.530.664.062.500 | 0.96278 | 0.99241 | 0.97945 | 10.091 | -0.0044000  | 0.0027000   |
| 20054 | 11.013 | 10.302 | 10.973 | 10.262 | -0.012000  | 0.00012400  | 200.539.257.812.500 | 0.95989 | 0.99193 | 0.97688 | 10.089 | -0.0022900  | 0.0024400   |
| 20055 | 10.910 | 10.281 | 10.869 | 10.240 | -0.011600  | 0.00074400  | 200.547.832.031.250 | 0.95885 | 0.99146 | 0.97617 | 10.088 | -0.00021700 | 0.0022200   |
| 20056 | 10.814 | 10.262 | 10.772 | 10.220 | -0.010800  | 0.0014500   | 200.556.425.781.250 | 0.95952 | 0.99101 | 0.97716 | 10.087 | 0.0015300   | 0.0017600   |
| 20057 | 10.725 | 10.245 | 10.683 | 10.202 | -0.0091100 | 0.0017900   | 200.565.000.000.000 | 0.96147 | 0.99058 | 0.97944 | 10.085 | 0.0028000   | 0.0012600   |
| 20057 | 10.647 | 10.227 | 10.604 | 10.184 | -0.0075000 | 0.0019000   | 200.574.667.968.750 | 0.96463 | 0.99011 | 0.98296 | 10.084 | 0.0038300   | 0.0010300   |
| 20058 | 10.589 | 10.213 | 10.544 | 10.169 | -0.0056400 | 0.0018500   | 200.583.242.187.500 | 0.96846 | 0.98971 | 0.98712 | 10.084 | 0.0046700   | 0.00047800  |
| 20059 | 10.545 | 10.199 | 10.500 | 10.154 | -0.0041200 | 0.0012300   | 200.592.910.156.250 | 0.97316 | 0.98928 | 0.99217 | 10.083 | 0.0047000   | -0.00019600 |
| 20060 | 10.513 | 10.188 | 10.467 | 10.143 | -0.0033900 | 0.00059000  | 200.601.503.906.250 | 0.97705 | 0.98891 | 0.99639 | 10.082 | 0.0043200   | -0.00068900 |
| 20061 | 10.483 | 10.178 | 10.436 | 10.131 | -0.0030500 | 0.00016400  | 200.611.152.343.750 | 0.98103 | 0.98851 | 10.007  | 10.082 | 0.0034500   | -0.0010700  |
| 20062 | 10.454 | 10.169 | 10.407 | 10.122 | -0.0030700 | -0.00040900 | 200.620.820.312.500 | 0.98371 | 0.98812 | 10.038  | 10.082 | 0.0022400   | -0.0013100  |



|       |         |        |         |        |             |             |                     |         |         |         |        |             |             |
|-------|---------|--------|---------|--------|-------------|-------------|---------------------|---------|---------|---------|--------|-------------|-------------|
| 20063 | 10.423  | 10.162 | 10.375  | 10.114 | -0.0038400  | -0.0010300  | 200.630.488.281.250 | 0.98537 | 0.98775 | 10.058  | 10.082 | 0.00091200  | -0.0013900  |
| 20064 | 10.380  | 10.157 | 10.331  | 10.108 | -0.0050700  | -0.0011600  | 200.640.156.250.000 | 0.98548 | 0.98739 | 10.063  | 10.082 | -0.00044900 | -0.0012600  |
| 20065 | 10.325  | 10.153 | 10.275  | 10.103 | -0.0060900  | -0.0010400  | 200.649.824.218.750 | 0.98450 | 0.98704 | 10.056  | 10.082 | -0.0015300  | -0.0010300  |
| 20066 | 10.262  | 10.150 | 10.211  | 10.099 | -0.0070900  | -0.00075600 | 200.659.492.187.500 | 0.98252 | 0.98671 | 10.040  | 10.082 | -0.0024400  | -0.00071000 |
| 20067 | 10.181  | 10.149 | 10.129  | 10.097 | -0.0076300  | -0.00044800 | 200.670.234.375.000 | 0.97952 | 0.98635 | 10.014  | 10.083 | -0.0029800  | -0.00039100 |
| 20068 | 10.107  | 10.149 | 10.054  | 10.096 | -0.0080000  | -0.00017800 | 200.679.902.343.750 | 0.97645 | 0.98603 | 0.99872 | 10.083 | -0.0032400  | -0.00021300 |
| 20069 | 10.017  | 10.150 | 0.99635 | 10.096 | -0.0080000  | 0.00024400  | 200.690.644.531.250 | 0.97292 | 0.98569 | 0.99558 | 10.084 | -0.0034100  | -7,58E-01   |
| 20070 | 0.99348 | 10.152 | 0.98801 | 10.097 | -0.0074800  | 0.00060300  | 200.701.386.718.750 | 0.96912 | 0.98536 | 0.99219 | 10.084 | -0.0034000  | 0.00014500  |
| 20071 | 0.98563 | 10.155 | 0.98007 | 10.100 | -0.0067000  | 0.00082900  | 200.712.148.437.500 | 0.96560 | 0.98503 | 0.98906 | 10.085 | -0.0031000  | 0.00043500  |
| 20072 | 0.97908 | 10.159 | 0.97342 | 10.103 | -0.0057000  | 0.00090900  | 200.722.890.625.000 | 0.96246 | 0.98471 | 0.98632 | 10.086 | -0.0024700  | 0.00083600  |
| 20073 | 0.97340 | 10.165 | 0.96764 | 10.107 | -0.0047500  | 0.00085700  | 200.733.632.812.500 | 0.96030 | 0.98440 | 0.98456 | 10.087 | -0.0013000  | 0.0012300   |
| 20074 | 0.96887 | 10.170 | 0.96303 | 10.112 | -0.0038600  | 0.00077100  | 200.744.394.531.250 | 0.95966 | 0.98409 | 0.98431 | 10.087 | 0.00017700  | 0.0014600   |
| 20076 | 0.96510 | 10.177 | 0.95916 | 10.117 | -0.0030900  | 0.00069300  | 200.755.136.718.750 | 0.96068 | 0.98377 | 0.98573 | 10.088 | 0.0018300   | 0.0014600   |
| 20077 | 0.96190 | 10.184 | 0.95585 | 10.124 | -0.0022900  | 0.00070200  | 200.766.972.656.250 | 0.96379 | 0.98343 | 0.98928 | 10.089 | 0.0034800   | 0.0015700   |
| 20078 | 0.95993 | 10.191 | 0.95379 | 10.130 | -0.0015000  | 0.00058700  | 200.777.734.375.000 | 0.96854 | 0.98312 | 0.99443 | 10.090 | 0.0053800   | 0.0015000   |
| 20079 | 0.95851 | 10.199 | 0.95226 | 10.137 | -0.00096600 | 0.00050300  | 200.789.550.781.250 | 0.97594 | 0.98277 | 10.023  | 10.091 | 0.0068600   | 0.00096800  |

|       |         |        |         |        |             |             |                     |         |         |         |        |             |             |
|-------|---------|--------|---------|--------|-------------|-------------|---------------------|---------|---------|---------|--------|-------------|-------------|
| 20080 | 0.95764 | 10.207 | 0.95129 | 10.144 | -0.00031300 | 0.00057700  | 200.801.386.718.750 | 0.98479 | 0.98241 | 10.115  | 10.092 | 0.0076700   | 0.00043700  |
| 20081 | 0.95780 | 10.214 | 0.95136 | 10.150 | 0.00033900  | 0.00052100  | 200.812.148.437.500 | 0.99327 | 0.98208 | 10.204  | 10.092 | 0.0078500   | -0.00015400 |
| 20082 | 0.95841 | 10.222 | 0.95186 | 10.156 | 0.00086400  | 0.00044300  | 200.823.984.375.000 | 10.025  | 0.98171 | 10.301  | 10.093 | 0.0073200   | -0.00082300 |
| 20084 | 0.95994 | 10.230 | 0.95328 | 10.163 | 0.0014400   | 0.00046700  | 200.836.894.531.250 | 10.114  | 0.98129 | 10.394  | 10.094 | 0.0058200   | -0.0015700  |
| 20085 | 0.96196 | 10.237 | 0.95520 | 10.169 | 0.0020200   | 0.00048000  | 200.848.730.468.750 | 10.169  | 0.98090 | 10.454  | 10.094 | 0.0034500   | -0.0021300  |
| 20086 | 0.96472 | 10.244 | 0.95785 | 10.175 | 0.0025700   | 0.00037500  | 200.860.566.406.250 | 10.196  | 0.98050 | 10.485  | 10.094 | 0.0007200   | -0.0021700  |
| 20087 | 0.96834 | 10.250 | 0.96136 | 10.181 | 0.0029500   | 0.00028800  | 200.873.496.093.750 | 10.188  | 0.98006 | 10.482  | 10.094 | -0.0019300  | -0.0022300  |
| 20089 | 0.97202 | 10.257 | 0.96494 | 10.186 | 0.0032900   | 0.00027300  | 200.885.332.031.250 | 10.148  | 0.97964 | 10.446  | 10.095 | -0.0047600  | -0.0020500  |
| 20090 | 0.97647 | 10.263 | 0.96928 | 10.191 | 0.0036200   | 0.00024900  | 200.898.261.718.750 | 10.070  | 0.97917 | 10.373  | 10.095 | -0.0070000  | -0.0014300  |
| 20091 | 0.98138 | 10.269 | 0.97408 | 10.196 | 0.0039300   | 0.00023900  | 200.911.171.875.000 | 0.99670 | 0.97869 | 10.275  | 10.095 | -0.0084700  | -0.00074100 |
| 20092 | 0.98621 | 10.274 | 0.97880 | 10.200 | 0.0042200   | 0.00015900  | 200.923.027.343.750 | 0.98608 | 0.97825 | 10.173  | 10.094 | -0.0088300  | 0.00016200  |
| 20094 | 0.99183 | 10.279 | 0.98431 | 10.204 | 0.0043300   | 8,37E-02    | 200.935.957.031.250 | 0.97481 | 0.97775 | 10.065  | 10.094 | -0.0080600  | 0.00085000  |
| 20095 | 0.99786 | 10.285 | 0.99022 | 10.208 | 0.0042400   | -0.00013500 | 200.949.960.937.500 | 0.96436 | 0.97720 | 0.99653 | 10.094 | -0.0065400  | 0.0013300   |
| 20096 | 10.032  | 10.289 | 0.99549 | 10.212 | 0.0039600   | -0.00027400 | 200.962.890.625.000 | 0.95719 | 0.97669 | 0.98982 | 10.093 | -0.0044900  | 0.0016400   |
| 20098 | 10.081  | 10.294 | 10.002  | 10.215 | 0.0035300   | -0.00036100 | 200.975.820.312.500 | 0.95274 | 0.97617 | 0.98584 | 10.093 | -0.0023000  | 0.0014900   |
| 20099 | 10.128  | 10.298 | 10.048  | 10.218 | 0.0029900   | -0.00037000 | 200.989.824.218.750 | 0.95099 | 0.97559 | 0.98459 | 10.092 | -0.00047100 | 0.0011400   |
| 20100 | 10.162  | 10.302 | 10.081  | 10.221 | 0.0025300   | -0.00024100 | 201.002.753.906.250 | 0.95148 | 0.97505 | 0.98554 | 10.091 | 0.00075600  | 0.00069900  |

|       |        |        |        |        |           |             |                     |         |         |         |        |            |             |
|-------|--------|--------|--------|--------|-----------|-------------|---------------------|---------|---------|---------|--------|------------|-------------|
| 20102 | 10.196 | 10.306 | 10.114 | 10.224 | 0.0023400 | -0.00011000 | 201.016.777.343.750 | 0.95303 | 0.97445 | 0.98760 | 10.090 | 0.0014100  | 0.00033200  |
| 20103 | 10.227 | 10.309 | 10.144 | 10.226 | 0.0022200 | -9,41E-02   | 201.030.800.781.250 | 0.95544 | 0.97385 | 0.99051 | 10.089 | 0.0016900  | -8,49E-03   |
| 20104 | 10.256 | 10.312 | 10.171 | 10.228 | 0.0023200 | 6,25E-01    | 201.043.730.468.750 | 0.95758 | 0.97329 | 0.99311 | 10.088 | 0.0014100  | -0.00025300 |
| 20106 | 10.290 | 10.315 | 10.204 | 10.229 | 0.0023900 | 5,74E-02    | 201.057.753.906.250 | 0.95925 | 0.97267 | 0.99527 | 10.087 | 0.0010100  | -0.00023900 |
| 20107 | 10.325 | 10.318 | 10.238 | 10.231 | 0.0023300 | -9,46E-01   | 201.072.851.562.500 | 0.96051 | 0.97199 | 0.99708 | 10.086 | 0.00071500 | -0.00017500 |
| 20109 | 10.358 | 10.320 | 10.269 | 10.232 | 0.0021200 | -0.00013800 | 201.086.875.000.000 | 0.96133 | 0.97135 | 0.99839 | 10.084 | 0.00049700 | -0.00012200 |
| 20110 | 10.385 | 10.322 | 10.295 | 10.232 | 0.0019500 | -0.00014800 | 201.100.898.437.500 | 0.96190 | 0.97071 | 0.99947 | 10.083 | 0.00037400 | 1,53E-04    |
| 20112 | 10.414 | 10.323 | 10.324 | 10.233 | 0.0016900 | -0.00015800 | 201.116.015.625.000 | 0.96242 | 0.97001 | 10.005  | 10.081 | 0.00049700 | 0.00013200  |
| 20113 | 10.434 | 10.325 | 10.342 | 10.233 | 0.0014900 | -4,56E-01   | 201.130.039.062.500 | 0.96335 | 0.96935 | 10.019  | 10.079 | 0.00075800 | 0.00019500  |
| 20115 | 10.458 | 10.326 | 10.365 | 10.233 | 0.0015500 | -1,03E-01   | 201.145.156.250.000 | 0.96463 | 0.96864 | 10.038  | 10.078 | 0.0010600  | 0.00027700  |
| 20116 | 10.481 | 10.327 | 10.386 | 10.232 | 0.0014500 | -7,43E-01   | 201.160.273.437.500 | 0.96657 | 0.96791 | 10.062  | 10.076 | 0.0016000  | 0.00042100  |
| 20117 | 10.500 | 10.327 | 10.404 | 10.232 | 0.0013400 | -6,25E-01   | 201.174.296.875.000 | 0.96927 | 0.96724 | 10.094  | 10.074 | 0.0022900  | 0.00047000  |
| 20119 | 10.520 | 10.328 | 10.423 | 10.231 | 0.0012700 | -4,40E-01   | 201.189.433.593.750 | 0.97325 | 0.96650 | 10.139  | 10.072 | 0.0029600  | 0.00037600  |
| 20121 | 10.540 | 10.328 | 10.442 | 10.230 | 0.0012000 | -3,26E-01   | 201.205.625.000.000 | 0.97856 | 0.96571 | 10.198  | 10.070 | 0.0034700  | 0.00016000  |
| 20122 | 10.557 | 10.328 | 10.458 | 10.228 | 0.0011700 | -4,32E-02   | 201.220.742.187.500 | 0.98411 | 0.96496 | 10.259  | 10.067 | 0.0034700  | -0.00015100 |
| 20124 | 10.575 | 10.327 | 10.475 | 10.227 | 0.0011900 | -4,79E-01   | 201.235.878.906.250 | 0.98905 | 0.96421 | 10.314  | 10.065 | 0.0030100  | -0.00038400 |

|       |        |        |        |        |             |             |                     |         |         |         |        |             |             |
|-------|--------|--------|--------|--------|-------------|-------------|---------------------|---------|---------|---------|--------|-------------|-------------|
| 20125 | 10.595 | 10.327 | 10.492 | 10.225 | 0.0010200   | -0.00011500 | 201.252.089.843.750 | 0.99355 | 0.96340 | 10.364  | 10.063 | 0.0022600   | -0.00064900 |
| 20127 | 10.607 | 10.326 | 10.504 | 10.222 | 0.00082500  | -0.00011200 | 201.267.207.031.250 | 0.99614 | 0.96264 | 10.395  | 10.060 | 0.00097800  | -0.00087900 |
| 20128 | 10.620 | 10.325 | 10.516 | 10.220 | 0.00066700  | -0.00010100 | 201.283.437.500.000 | 0.99662 | 0.96182 | 10.406  | 10.058 | -0.00049200 | -0.00089900 |
| 20130 | 10.629 | 10.323 | 10.523 | 10.217 | 0.00049600  | -9.55E-01   | 201.299.648.437.500 | 0.99455 | 0.96100 | 10.391  | 10.055 | -0.0019400  | -0.00085100 |
| 20131 | 10.636 | 10.322 | 10.529 | 10.214 | 0.00036800  | -9.25E-01   | 201.314.785.156.250 | 0.99054 | 0.96023 | 10.356  | 10.053 | -0.0031600  | -0.00062400 |
| 20133 | 10.640 | 10.320 | 10.532 | 10.211 | 0.00020600  | -9.07E-01   | 201.330.996.093.750 | 0.98464 | 0.95940 | 10.303  | 10.050 | -0.0039000  | -0.00036400 |
| 20135 | 10.643 | 10.318 | 10.533 | 10.208 | 6.38E-01    | -0.00010100 | 201.348.300.781.250 | 0.97748 | 0.95852 | 10.237  | 10.047 | -0.0043800  | -0.00026600 |
| 20136 | 10.643 | 10.316 | 10.531 | 10.204 | -0.00013200 | -0.00014500 | 201.364.531.250.000 | 0.96996 | 0.95769 | 10.167  | 10.045 | -0.0047900  | -0.00022600 |
| 20138 | 10.639 | 10.313 | 10.526 | 10.200 | -0.00040600 | -0.00016500 | 201.380.761.718.750 | 0.96194 | 0.95685 | 10.093  | 10.042 | -0.0051100  | -0.00014600 |
| 20140 | 10.629 | 10.311 | 10.515 | 10.197 | -0.00066600 | -0.00021100 | 201.396.992.187.500 | 0.95337 | 0.95602 | 10.013  | 10.039 | -0.0052600  | 5.04E-01    |
| 20141 | 10.616 | 10.308 | 10.501 | 10.192 | -0.0011100  | -0.00026100 | 201.414.316.406.250 | 0.94428 | 0.95513 | 0.99276 | 10.036 | -0.0049400  | 0.00029100  |
| 20143 | 10.591 | 10.305 | 10.474 | 10.188 | -0.0015700  | -0.00023700 | 201.431.640.625.000 | 0.93625 | 0.95424 | 0.98531 | 10.033 | -0.0042600  | 0.00053500  |
| 20145 | 10.564 | 10.302 | 10.445 | 10.184 | -0.0019100  | -0.00015500 | 201.447.871.093.750 | 0.93000 | 0.95341 | 0.97962 | 10.030 | -0.0031500  | 0.00068100  |
| 20147 | 10.527 | 10.299 | 10.407 | 10.179 | -0.0020900  | -6.07E-01   | 201.465.195.312.500 | 0.92568 | 0.95253 | 0.97589 | 10.027 | -0.0019700  | 0.00055500  |
| 20148 | 10.491 | 10.296 | 10.370 | 10.175 | -0.0021200  | 1.70E-01    | 201.482.539.062.500 | 0.92317 | 0.95164 | 0.97397 | 10.024 | -0.0012300  | 0.00031300  |
| 20150 | 10.453 | 10.292 | 10.331 | 10.170 | -0.0020300  | 8.68E-01    | 201.499.863.281.250 | 0.92143 | 0.95076 | 0.97282 | 10.021 | -0.00088500 | 0.00015800  |
| 20152 | 10.419 | 10.289 | 10.294 | 10.165 | -0.0018100  | 9.49E-01    | 201.518.281.250.000 | 0.92001 | 0.94983 | 0.97201 | 10.018 | -0.00066000 | 0.00012700  |

|       |        |        |         |        |             |            |                     |         |         |         |         |             |             |
|-------|--------|--------|---------|--------|-------------|------------|---------------------|---------|---------|---------|---------|-------------|-------------|
| 20154 | 10.388 | 10.285 | 10.263  | 10.160 | -0.0016900  | 1,16E-01   | 201.535.625.000.000 | 0.91907 | 0.94896 | 0.97167 | 10.016  | -0.00043100 | 0.00017300  |
| 20155 | 10.360 | 10.282 | 10.233  | 10.155 | -0.0017700  | -6,07E-01  | 201.552.968.750.000 | 0.91851 | 0.94809 | 0.97168 | 10.013  | -5,92E-01   | 0.00028200  |
| 20157 | 10.325 | 10.278 | 10.197  | 10.150 | -0.0019100  | -5,08E-01  | 201.571.386.718.750 | 0.91886 | 0.94718 | 0.97265 | 10.010  | 0.00057600  | 0.00039400  |
| 20159 | 10.290 | 10.274 | 10.160  | 10.144 | -0.0019600  | -2,38E-01  | 201.589.824.218.750 | 0.92063 | 0.94627 | 0.97504 | 10.007  | 0.0013900   | 0.00041800  |
| 20161 | 10.255 | 10.271 | 10.124  | 10.140 | -0.0019900  | 9,41E-02   | 201.607.167.968.750 | 0.92384 | 0.94542 | 0.97883 | 10.004  | 0.0020700   | 0.00024400  |
| 20163 | 10.218 | 10.267 | 10.085  | 10.134 | -0.0019200  | 9,72E-01   | 201.625.605.468.750 | 0.92805 | 0.94453 | 0.98365 | 10.001  | 0.0022700   | -1,02E-01   |
| 20164 | 10.184 | 10.264 | 10.050  | 10.129 | -0.0016300  | 0.00019800 | 201.644.062.500.000 | 0.93220 | 0.94365 | 0.98842 | 0.99987 | 0.0020300   | -0.00017000 |
| 20166 | 10.158 | 10.260 | 10.022  | 10.124 | -0.0011900  | 0.00022000 | 201.662.500.000.000 | 0.93556 | 0.94277 | 0.99239 | 0.99960 | 0.0016400   | -0.00022500 |
| 20168 | 10.140 | 10.257 | 10.003  | 10.119 | -0.00082400 | 0.00014000 | 201.680.957.031.250 | 0.93825 | 0.94191 | 0.99569 | 0.99935 | 0.0012000   | -0.00023300 |
| 20170 | 10.127 | 10.253 | 0.99878 | 10.114 | -0.00066100 | 9,76E-01   | 201.700.488.281.250 | 0.94013 | 0.94101 | 0.99822 | 0.99910 | 0.00075400  | -0.00028000 |
| 20172 | 10.115 | 10.250 | 0.99748 | 10.110 | -0.00045400 | 6,28E-01   | 201.718.945.312.500 | 0.94111 | 0.94017 | 0.99981 | 0.99887 | 0.00013900  | -0.00031200 |
| 20174 | 10.109 | 10.247 | 0.99675 | 10.105 | -0.00042200 | -3,44E-01  | 201.738.496.093.750 | 0.94066 | 0.93930 | 100.000 | 0.99864 | -0.00043300 | -0.00015500 |
| 20176 | 10.099 | 10.244 | 0.99557 | 10.100 | -0.00058400 | -5,27E-01  | 201.756.953.125.000 | 0.93947 | 0.93849 | 0.99941 | 0.99843 | -0.00045000 | 0.00016900  |
| 20178 | 10.087 | 10.241 | 0.99423 | 10.096 | -0.00062200 | -4,37E-02  | 201.776.503.906.250 | 0.93895 | 0.93764 | 0.99953 | 0.99822 | 0.00020800  | 0.00049300  |
| 20180 | 10.075 | 10.238 | 0.99283 | 10.091 | -0.00060100 | 3,98E-01   | 201.796.054.687.500 | 0.94028 | 0.93681 | 10.015  | 0.99803 | 0.0014800   | 0.00076400  |
| 20182 | 10.064 | 10.235 | 0.99156 | 10.087 | -0.00046600 | 9,19E-01   | 201.815.625.000.000 | 0.94474 | 0.93598 | 10.066  | 0.99784 | 0.0032000   | 0.00081100  |

|       |        |        |         |        |             |            |                     |         |         |         |         |            |             |
|-------|--------|--------|---------|--------|-------------|------------|---------------------|---------|---------|---------|---------|------------|-------------|
| 20184 | 10.057 | 10.233 | 0.99069 | 10.083 | -0.00024200 | 0.00011100 | 201.835.195.312.500 | 0.95279 | 0.93518 | 10.153  | 0.99767 | 0.0046500  | 0.00055900  |
| 20185 | 10.054 | 10.230 | 0.99031 | 10.079 | -3,01E-01   | 0.00012200 | 201.854.765.625.000 | 0.96296 | 0.93438 | 10.261  | 0.99751 | 0.0053800  | 0.00011100  |
| 20187 | 10.055 | 10.228 | 0.99027 | 10.076 | 0.00023400  | 0.00011900 | 201.874.335.937.500 | 0.97387 | 0.93360 | 10.376  | 0.99736 | 0.0050900  | -0.00037100 |
| 20190 | 10.064 | 10.226 | 0.99093 | 10.072 | 0.00045000  | 5,02E-01   | 201.895.000.000.000 | 0.98344 | 0.93279 | 10.479  | 0.99721 | 0.0038900  | -0.00073100 |
| 20191 | 10.073 | 10.224 | 0.99176 | 10.068 | 0.00043600  | -9,27E-02  | 201.914.570.312.500 | 0.98952 | 0.93203 | 10.546  | 0.99708 | 0.0021500  | -0.00091900 |
| 20194 | 10.081 | 10.222 | 0.99237 | 10.065 | 0.00041300  | -1,20E-01  | 201.935.253.906.250 | 0.99209 | 0.93124 | 10.578  | 0.99696 | 0.00019100 | -0.0010300  |
| 20195 | 10.090 | 10.220 | 0.99311 | 10.061 | 0.00038800  | -4,59E-01  | 201.954.824.218.750 | 0.99029 | 0.93051 | 10.566  | 0.99685 | -0.0019800 | -0.0010400  |
| 20198 | 10.097 | 10.219 | 0.99362 | 10.058 | 0.00022800  | -6,63E-01  | 201.975.507.812.500 | 0.98410 | 0.92974 | 10.511  | 0.99675 | -0.0039900 | -0.00093900 |
| 20200 | 10.100 | 10.217 | 0.99373 | 10.055 | 0.00011400  | -2,79E-01  | 201.996.191.406.250 | 0.97377 | 0.92899 | 10.414  | 0.99666 | -0.0058700 | -0.00079800 |
| 20202 | 10.102 | 10.216 | 0.99377 | 10.052 | 0.00011200  | -1,85E-03  | 202.016.894.531.250 | 0.95982 | 0.92826 | 10.281  | 0.99657 | -0.0073000 | -0.00056500 |
| 20204 | 10.104 | 10.215 | 0.99387 | 10.049 | 0.00011300  | 1,76E-02   | 202.037.578.125.000 | 0.94357 | 0.92753 | 10.125  | 0.99650 | -0.0082000 | -0.00027200 |
| 20206 | 10.106 | 10.213 | 0.99392 | 10.046 | 0.00012000  | 1,60E-01   | 202.059.375.000.000 | 0.92496 | 0.92678 | 0.99462 | 0.99644 | -0.0084500 | 6,40E-01    |
| 20208 | 10.109 | 10.212 | 0.99406 | 10.044 | 0.00018100  | 1,20E-01   | 202.080.078.125.000 | 0.90766 | 0.92607 | 0.97797 | 0.99639 | -0.0079300 | 0.00041200  |
| 20210 | 10.114 | 10.212 | 0.99435 | 10.041 | 0.00017000  | -2,87E-01  | 202.100.781.250.000 | 0.89212 | 0.92538 | 0.96308 | 0.99634 | -0.0067500 | 0.00072200  |
| 20212 | 10.116 | 10.211 | 0.99445 | 10.039 | 5,87E-01    | -1,49E-01  | 202.122.578.125.000 | 0.87899 | 0.92466 | 0.95063 | 0.99631 | -0.0048700 | 0.00097100  |
| 20214 | 10.116 | 10.210 | 0.99427 | 10.036 | 0.00010500  | 3,70E-01   | 202.144.375.000.000 | 0.87091 | 0.92396 | 0.94323 | 0.99628 | -0.0025100 | 0.0011400   |
| 20217 | 10.121 | 10.209 | 0.99457 | 10.034 | 0.00021600  | 5,74E-01   | 202.165.097.656.250 | 0.86829 | 0.92330 | 0.94126 | 0.99627 | -3,17E-01  | 0.0010200   |

|       |        |        |         |        |            |           |                     |         |         |         |         |            |             |
|-------|--------|--------|---------|--------|------------|-----------|---------------------|---------|---------|---------|---------|------------|-------------|
| 20219 | 10.126 | 10.209 | 0.99487 | 10.032 | 0.00034900 | 7,77E-01  | 202.186.914.062.500 | 0.87077 | 0.92261 | 0.94442 | 0.99626 | 0.0018300  | 0.00062200  |
| 20221 | 10.136 | 10.209 | 0.99576 | 10.030 | 0.00055500 | 9,17E-01  | 202.208.730.468.750 | 0.87625 | 0.92194 | 0.95058 | 0.99626 | 0.0026800  | 0.00014400  |
| 20223 | 10.150 | 10.208 | 0.99696 | 10.028 | 0.00074900 | 6,74E-01  | 202.230.566.406.250 | 0.88248 | 0.92128 | 0.95748 | 0.99627 | 0.0024500  | -0.00024700 |
| 20225 | 10.170 | 10.208 | 0.99878 | 10.026 | 0.00085700 | 4,99E-01  | 202.253.476.562.500 | 0.88723 | 0.92059 | 0.96293 | 0.99629 | 0.0015800  | -0.00037700 |
| 20228 | 10.188 | 10.208 | 10.005  | 10.025 | 0.00097300 | 5,43E-01  | 202.275.312.500.000 | 0.88953 | 0.91995 | 0.96590 | 0.99632 | 0.00076400 | -0.00025800 |
| 20230 | 10.212 | 10.208 | 10.027  | 10.023 | 0.0010900  | 9,99E-02  | 202.297.148.437.500 | 0.89056 | 0.91931 | 0.96760 | 0.99635 | 0.00044700 | -4,73E-02   |
| 20232 | 10.237 | 10.209 | 10.050  | 10.022 | 0.0010200  | -3,69E-01 | 202.320.097.656.250 | 0.89154 | 0.91866 | 0.96927 | 0.99639 | 0.00074300 | 0.00019500  |
| 20234 | 10.259 | 10.209 | 10.070  | 10.020 | 0.00092500 | -5,72E-01 | 202.343.027.343.750 | 0.89397 | 0.91801 | 0.97241 | 0.99644 | 0.0013400  | 0.00026300  |
| 20236 | 10.279 | 10.209 | 10.088  | 10.019 | 0.00076100 | -8,76E-01 | 202.364.882.812.500 | 0.89755 | 0.91740 | 0.97664 | 0.99650 | 0.0019200  | 0.00026000  |
| 20239 | 10.293 | 10.210 | 10.101  | 10.018 | 0.00053200 | -8,84E-01 | 202.387.832.031.250 | 0.90257 | 0.91677 | 0.98236 | 0.99656 | 0.0025100  | 0.00022400  |
| 20241 | 10.303 | 10.210 | 10.109  | 10.017 | 0.00035500 | -6,31E-01 | 202.410.800.781.250 | 0.90906 | 0.91615 | 0.98954 | 0.99663 | 0.0029500  | 0.00014700  |
| 20243 | 10.309 | 10.211 | 10.114  | 10.016 | 0.00024200 | -1,94E-01 | 202.433.750.000.000 | 0.91610 | 0.91554 | 0.99727 | 0.99671 | 0.0031800  | 5,55E-01    |
| 20246 | 10.314 | 10.212 | 10.117  | 10.015 | 0.00026600 | 3,14E-01  | 202.456.718.750.000 | 0.92368 | 0.91493 | 10.055  | 0.99679 | 0.0032000  | -7,40E-01   |
| 20248 | 10.322 | 10.213 | 10.123  | 10.014 | 0.00039000 | 2,13E-01  | 202.480.800.781.250 | 0.93116 | 0.91431 | 10.137  | 0.99688 | 0.0028300  | -0.00022000 |
| 20250 | 10.332 | 10.214 | 10.132  | 10.013 | 0.00036700 | -3,41E-01 | 202.503.769.531.250 | 0.93702 | 0.91372 | 10.203  | 0.99698 | 0.0021600  | -0.00031300 |
| 20253 | 10.339 | 10.215 | 10.137  | 10.012 | 0.00022900 | -5,39E-01 | 202.527.851.562.500 | 0.94135 | 0.91311 | 10.253  | 0.99708 | 0.0013600  | -0.00034200 |

|       |        |        |        |        |             |           |                     |         |         |         |         |             |             |
|-------|--------|--------|--------|--------|-------------|-----------|---------------------|---------|---------|---------|---------|-------------|-------------|
| 20255 | 10.343 | 10.216 | 10.139 | 10.012 | 0.00011300  | -6,10E-01 | 202.550.839.843.750 | 0.94342 | 0.91253 | 10.281  | 0.99718 | 0.00055500  | -0.00026500 |
| 20257 | 10.344 | 10.217 | 10.139 | 10.011 | -5,76E-01   | -7,08E-01 | 202.574.921.875.000 | 0.94396 | 0.91193 | 10.293  | 0.99729 | 0.00011600  | -0.00012000 |
| 20260 | 10.340 | 10.218 | 10.133 | 10.011 | -0.00022800 | -6,56E-01 | 202.599.023.437.500 | 0.94398 | 0.91134 | 10.300  | 0.99740 | -2,42E-01   | -2,30E-01   |
| 20262 | 10.333 | 10.219 | 10.124 | 10.010 | -0.00037400 | -5,30E-01 | 202.623.125.000.000 | 0.94384 | 0.91075 | 10.306  | 0.99752 | 4,81E-02    | -2,39E-02   |
| 20265 | 10.322 | 10.221 | 10.111 | 10.010 | -0.00048300 | -2,75E-01 | 202.647.226.562.500 | 0.94400 | 0.91017 | 10.315  | 0.99764 | -3,57E-01   | -8,48E-01   |
| 20267 | 10.310 | 10.222 | 10.097 | 10.009 | -0.00050600 | -2,44E-02 | 202.671.347.656.250 | 0.94367 | 0.90959 | 10.318  | 0.99776 | -0.00040400 | -0.00020000 |
| 20270 | 10.298 | 10.224 | 10.084 | 10.009 | -0.00049500 | 1,84E-01  | 202.695.468.750.000 | 0.94205 | 0.90901 | 10.309  | 0.99789 | -0.00100000 | -0.00024600 |
| 20272 | 10.286 | 10.225 | 10.070 | 10.009 | -0.00041800 | 3,61E-01  | 202.719.589.843.750 | 0.93885 | 0.90844 | 10.284  | 0.99801 | -0.00159000 | -0.00021400 |
| 20274 | 10.277 | 10.227 | 10.059 | 10.009 | -0.00031700 | 2,83E-01  | 202.744.804.687.500 | 0.93420 | 0.90785 | 10.245  | 0.99815 | -0.00205000 | -0.00018900 |
| 20277 | 10.271 | 10.228 | 10.051 | 10.008 | -0.00027800 | 2,78E-01  | 202.768.945.312.500 | 0.92870 | 0.90729 | 10.197  | 0.99827 | -0.00253000 | -0.00019700 |
| 20279 | 10.264 | 10.230 | 10.042 | 10.008 | -0.00017900 | 4,95E-01  | 202.794.179.687.500 | 0.92174 | 0.90670 | 10.134  | 0.99841 | -0.00303000 | -0.00020800 |
| 20282 | 10.261 | 10.231 | 10.038 | 10.008 | -2,79E-01   | 4,94E-01  | 202.819.433.593.750 | 0.91342 | 0.90612 | 10.058  | 0.99854 | -0.00358000 | -0.00014400 |
| 20284 | 10.262 | 10.233 | 10.037 | 10.008 | 7,01E-01    | 3,55E-01  | 202.844.687.500.000 | 0.90367 | 0.90553 | 0.99681 | 0.99867 | -0.00375000 | 3,17E-01    |
| 20287 | 10.265 | 10.235 | 10.038 | 10.008 | 0.00015100  | 5,99E-02  | 202.869.941.406.250 | 0.89446 | 0.90495 | 0.98831 | 0.99880 | -0.00342000 | 0.00018700  |
| 20290 | 10.270 | 10.236 | 10.041 | 10.008 | 1,00E+00    | -2,62E-01 | 202.895.214.843.750 | 0.88641 | 0.90437 | 0.98097 | 0.99893 | -0.00281000 | 0.00022200  |
| 20292 | 10.270 | 10.238 | 10.040 | 10.008 | 1,87E-01    | -2,91E-01 | 202.920.488.281.250 | 0.88026 | 0.90379 | 0.97553 | 0.99906 | -0.00230000 | 0.00014600  |
| 20295 | 10.271 | 10.240 | 10.039 | 10.007 | -4,69E-01   | -2,30E-01 | 202.945.761.718.750 | 0.87480 | 0.90321 | 0.97077 | 0.99918 | -0.00207000 | 8,97E-01    |



|       |        |        |         |        |             |           |                     |         |         |         |         |             |             |
|-------|--------|--------|---------|--------|-------------|-----------|---------------------|---------|---------|---------|---------|-------------|-------------|
| 20297 | 10.268 | 10.241 | 10.034  | 10.007 | -1,00E+00   | -3,10E-01 | 202.972.148.437.500 | 0.86958 | 0.90260 | 0.96629 | 0.99931 | -0.0018300  | 0.00012300  |
| 20300 | 10.266 | 10.243 | 10.030  | 10.007 | -0.00020700 | -5,40E-01 | 202.997.441.406.250 | 0.86532 | 0.90202 | 0.96273 | 0.99942 | -0.0014300  | 0.00022300  |
| 20302 | 10.257 | 10.245 | 10.019  | 10.007 | -0.00037900 | -4,70E-01 | 203.023.828.125.000 | 0.86219 | 0.90141 | 0.96032 | 0.99954 | -0.00067800 | 0.00035600  |
| 20305 | 10.246 | 10.246 | 10.006  | 10.007 | -0.00045500 | -9,58E-02 | 203.050.234.375.000 | 0.86174 | 0.90080 | 0.96061 | 0.99966 | 0.00044700  | 0.00043700  |
| 20308 | 10.233 | 10.248 | 0.99922 | 10.007 | -0.00042900 | 3,61E-02  | 203.075.546.875.000 | 0.86450 | 0.90021 | 0.96405 | 0.99976 | 0.0015800   | 0.00034500  |
| 20310 | 10.224 | 10.249 | 0.99805 | 10.006 | -0.00043600 | 5,01E-02  | 203.101.972.656.250 | 0.86993 | 0.89959 | 0.97020 | 0.99987 | 0.0022300   | 0.00015100  |
| 20313 | 10.210 | 10.251 | 0.99656 | 10.006 | -0.00040200 | 3,25E-01  | 203.128.378.906.250 | 0.87630 | 0.89898 | 0.97729 | 0.99997 | 0.0023800   | 1,03E-01    |
| 20315 | 10.202 | 10.252 | 0.99557 | 10.006 | -0.00026500 | 5,38E-01  | 203.154.824.218.750 | 0.88249 | 0.89837 | 0.98420 | 10.001  | 0.0022900   | -3,54E-01   |
| 20318 | 10.196 | 10.254 | 0.99476 | 10.006 | -0.00011200 | 5,90E-01  | 203.182.363.281.250 | 0.88865 | 0.89772 | 0.99110 | 10.002  | 0.0021900   | -3,23E-01   |
| 20321 | 10.196 | 10.256 | 0.99460 | 10.005 | 5,39E-01    | 3,79E-01  | 203.208.808.593.750 | 0.89430 | 0.89711 | 0.99746 | 10.003  | 0.0021100   | -3,90E-01   |
| 20324 | 10.199 | 10.257 | 0.99469 | 10.005 | 9,28E-01    | -9,20E-02 | 203.236.367.187.500 | 0.90006 | 0.89646 | 10.040  | 10.004  | 0.0019800   | -8,63E-01   |
| 20326 | 10.201 | 10.259 | 0.99474 | 10.005 | 4,24E-02    | -4,25E-01 | 203.262.812.500.000 | 0.90497 | 0.89584 | 10.096  | 10.004  | 0.0016500   | -0.00013000 |
| 20329 | 10.199 | 10.260 | 0.99435 | 10.004 | -0.00013700 | -4,30E-01 | 203.290.390.625.000 | 0.90896 | 0.89520 | 10.143  | 10.005  | 0.0012700   | -0.00012900 |
| 20332 | 10.194 | 10.262 | 0.99364 | 10.004 | -0.00022800 | -8,57E-02 | 203.316.875.000.000 | 0.91185 | 0.89458 | 10.179  | 10.006  | 0.00095000  | -0.00012200 |
| 20334 | 10.187 | 10.263 | 0.99276 | 10.004 | -0.00018300 | 3,47E-01  | 203.344.453.125.000 | 0.91410 | 0.89393 | 10.208  | 10.007  | 0.00061500  | -0.00012900 |
| 20337 | 10.184 | 10.265 | 0.99226 | 10.003 | -3,66E-01   | 5,92E-01  | 203.372.050.781.250 | 0.91524 | 0.89329 | 10.227  | 10.008  | 0.00024000  | -0.00012000 |

|       |        |        |         |         |            |           |                     |         |         |         |        |             |             |
|-------|--------|--------|---------|---------|------------|-----------|---------------------|---------|---------|---------|--------|-------------|-------------|
| 20340 | 10.185 | 10.266 | 0.99219 | 10.003  | 0.00014400 | 5,16E-01  | 203.399.648.437.500 | 0.91542 | 0.89264 | 10.236  | 10.008 | -4,65E-01   | -0.00012200 |
| 20343 | 10.192 | 10.268 | 0.99270 | 10.003  | 0.00025400 | 3,33E-01  | 203.428.359.375.000 | 0.91498 | 0.89196 | 10.239  | 10.009 | -0.00044900 | -0.00015900 |
| 20346 | 10.199 | 10.269 | 0.99325 | 10.002  | 0.00033200 | 2,37E-01  | 203.455.976.562.500 | 0.91289 | 0.89132 | 10.225  | 10.010 | -0.00094200 | -0.00013100 |
| 20348 | 10.210 | 10.270 | 0.99417 | 10.002  | 0.00038500 | -4,68E-02 | 203.483.593.750.000 | 0.90978 | 0.89067 | 10.201  | 10.010 | -0.0011800  | -5,54E-01   |
| 20351 | 10.221 | 10.272 | 0.99505 | 10.002  | 0.00030500 | -1,55E-01 | 203.512.324.218.750 | 0.90627 | 0.88999 | 10.174  | 10.011 | -0.0012500  | 1,11E-01    |
| 20354 | 10.227 | 10.273 | 0.99553 | 10.001  | 0.00029800 | 5,76E-02  | 203.539.960.937.500 | 0.90271 | 0.88934 | 10.145  | 10.011 | -0.0011100  | 9,15E-01    |
| 20357 | 10.238 | 10.275 | 0.99636 | 10.001  | 0.00033800 | 4,75E-02  | 203.568.730.468.750 | 0.89999 | 0.88867 | 10.125  | 10.012 | -0.00073800 | 0.00010900  |
| 20360 | 10.247 | 10.276 | 0.99710 | 10.000  | 0.00032500 | -5,56E-03 | 203.597.480.468.750 | 0.89847 | 0.88799 | 10.117  | 10.012 | -0.00048500 | 3,06E-01    |
| 20363 | 10.256 | 10.278 | 0.99786 | 0.99999 | 0.00033500 | -8,13E-02 | 203.626.250.000.000 | 0.89720 | 0.88732 | 10.112  | 10.013 | -0.00056200 | -8,11E-01   |
| 20366 | 10.266 | 10.279 | 0.99866 | 0.99995 | 0.00027800 | -2,36E-01 | 203.655.039.062.500 | 0.89523 | 0.88664 | 10.099  | 10.013 | -0.00095100 | -0.00017100 |
| 20368 | 10.272 | 10.280 | 0.99910 | 0.99990 | 0.00019900 | -2,18E-01 | 203.683.808.593.750 | 0.89173 | 0.88597 | 10.071  | 10.014 | -0.0015400  | -0.00018700 |
| 20371 | 10.278 | 10.282 | 0.99944 | 0.99986 | 0.00015300 | -1,82E-01 | 203.712.617.187.500 | 0.88634 | 0.88529 | 10.025  | 10.014 | -0.0020300  | -8,74E-01   |
| 20374 | 10.281 | 10.283 | 0.99961 | 0.99981 | 9,43E-01   | -2,24E-02 | 203.741.406.250.000 | 0.88006 | 0.88462 | 0.99689 | 10.015 | -0.0020500  | 8,51E-01    |
| 20377 | 10.283 | 10.285 | 0.99962 | 0.99977 | 0.00014000 | 1,06E-01  | 203.771.328.125.000 | 0.87433 | 0.88392 | 0.99189 | 10.015 | -0.0015300  | 0.00022600  |
| 20380 | 10.289 | 10.286 | 10.001  | 0.99972 | 0.00015600 | -2,32E-02 | 203.800.156.250.000 | 0.87110 | 0.88325 | 0.98937 | 10.015 | -0.00072100 | 0.00023800  |
| 20383 | 10.292 | 10.287 | 10.002  | 0.99968 | 0.00012600 | 1,16E-01  | 203.830.078.125.000 | 0.87009 | 0.88255 | 0.98908 | 10.015 | -0.00013000 | 0.00012600  |
| 20386 | 10.297 | 10.289 | 10.004  | 0.99963 | 0.00022500 | 3,19E-01  | 203.858.925.781.250 | 0.87033 | 0.88188 | 0.99003 | 10.016 | 1,91E-01    | 1,43E-02    |

|       |        |        |        |         |             |           |                     |         |         |         |        |             |             |
|-------|--------|--------|--------|---------|-------------|-----------|---------------------|---------|---------|---------|--------|-------------|-------------|
| 20389 | 10.306 | 10.290 | 10.011 | 0.99958 | 0.00031400  | 1,61E-01  | 203.888.867.187.500 | 0.87020 | 0.88118 | 0.99061 | 10.016 | -0.00012200 | -3,56E-01   |
| 20392 | 10.316 | 10.291 | 10.019 | 0.99954 | 0.00032100  | -3,46E-02 | 203.918.828.125.000 | 0.86961 | 0.88048 | 0.99073 | 10.016 | -0.00019400 | -3,99E-01   |
| 20395 | 10.325 | 10.293 | 10.027 | 0.99949 | 0.00029300  | -1,57E-01 | 203.948.808.593.750 | 0.86904 | 0.87979 | 0.99088 | 10.016 | -0.00036000 | -5,08E-01   |
| 20398 | 10.333 | 10.294 | 10.033 | 0.99944 | 0.00022700  | -2,15E-01 | 203.978.789.062.500 | 0.86745 | 0.87909 | 0.99000 | 10.016 | -0.00049900 | 3,72E-02    |
| 20401 | 10.339 | 10.296 | 10.037 | 0.99939 | 0.00016200  | -2,41E-01 | 204.009.882.812.500 | 0.86599 | 0.87837 | 0.98927 | 10.017 | -0.00033800 | 9,65E-01    |
| 20404 | 10.343 | 10.297 | 10.040 | 0.99935 | 7,97E-01    | -4,07E-01 | 204.039.882.812.500 | 0.86538 | 0.87768 | 0.98937 | 10.017 | 9,01E-01    | 0.00016300  |
| 20407 | 10.343 | 10.298 | 10.038 | 0.99930 | -8,27E-01   | -3,70E-01 | 204.069.882.812.500 | 0.86653 | 0.87699 | 0.99121 | 10.017 | 0.00064100  | 0.00013000  |
| 20410 | 10.338 | 10.300 | 10.031 | 0.99925 | -0.00014700 | -6,38E-02 | 204.101.015.625.000 | 0.86930 | 0.87627 | 0.99470 | 10.017 | 0.00088500  | 1,87E-01    |
| 20413 | 10.334 | 10.301 | 10.025 | 0.99920 | -0.00012200 | 1,38E-01  | 204.131.035.156.250 | 0.87194 | 0.87558 | 0.99804 | 10.017 | 0.00075500  | -7,52E-01   |
| 20416 | 10.331 | 10.302 | 10.020 | 0.99916 | -6,22E-01   | 3,14E-01  | 204.162.187.500.000 | 0.87392 | 0.87487 | 10.007  | 10.017 | 0.00042500  | -0.00011800 |
| 20419 | 10.331 | 10.304 | 10.018 | 0.99911 | 7,42E-01    | 3,41E-01  | 204.193.339.843.750 | 0.87459 | 0.87416 | 10.021  | 10.017 | 1,73E-01    | -0.00011600 |
| 20422 | 10.335 | 10.305 | 10.021 | 0.99907 | 0.00015000  | 7,62E-02  | 204.224.511.718.750 | 0.87403 | 0.87345 | 10.022  | 10.017 | -0.00030100 | -7,41E-01   |
| 20426 | 10.340 | 10.307 | 10.024 | 0.99902 | 0.00012200  | -1,59E-01 | 204.255.683.593.750 | 0.87272 | 0.87274 | 10.016  | 10.017 | -0.00044500 | -2,70E-01   |
| 20429 | 10.343 | 10.308 | 10.025 | 0.99898 | 5,11E-01    | -2,18E-01 | 204.286.875.000.000 | 0.87125 | 0.87203 | 10.009  | 10.017 | -0.00046900 | 1,78E-01    |
| 20432 | 10.343 | 10.309 | 10.023 | 0.99893 | -1,41E-01   | -1,30E-01 | 204.318.066.406.250 | 0.86979 | 0.87133 | 10.001  | 10.016 | -0.00033400 | 6,70E-01    |
| 20435 | 10.342 | 10.311 | 10.020 | 0.99889 | -3,12E-01   | -7,59E-02 | 204.350.390.625.000 | 0.86913 | 0.87060 | 10.002  | 10.016 | -4,30E-01   | 0.00010900  |

|       |        |        |         |         |             |           |                     |         |         |         |        |             |             |
|-------|--------|--------|---------|---------|-------------|-----------|---------------------|---------|---------|---------|--------|-------------|-------------|
| 20438 | 10.341 | 10.312 | 10.017  | 0.99885 | -6,23E-01   | -1,81E-01 | 204.381.601.562.500 | 0.86952 | 0.86990 | 10.012  | 10.016 | 0.00035900  | 0.00011800  |
| 20441 | 10.338 | 10.314 | 10.012  | 0.99881 | -0.00014600 | -1,82E-01 | 204.413.945.312.500 | 0.87141 | 0.86917 | 10.038  | 10.016 | 0.00070600  | 7,69E-01    |
| 20445 | 10.332 | 10.315 | 10.004  | 0.99877 | -0.00017800 | 8,67E-03  | 204.445.175.781.250 | 0.87401 | 0.86848 | 10.071  | 10.016 | 0.00084800  | 8,13E-02    |
| 20448 | 10.327 | 10.317 | 0.99973 | 0.99873 | -0.00014100 | 1,82E-01  | 204.477.539.062.500 | 0.87680 | 0.86776 | 10.106  | 10.016 | 0.00075800  | -7,05E-01   |
| 20451 | 10.323 | 10.318 | 0.99916 | 0.99869 | -6,05E-01   | 2,87E-01  | 204.509.902.343.750 | 0.87892 | 0.86705 | 10.134  | 10.015 | 0.00039100  | -0.00014600 |
| 20454 | 10.323 | 10.319 | 0.99897 | 0.99865 | 4,46E-01    | 2,87E-01  | 204.542.285.156.250 | 0.87933 | 0.86633 | 10.145  | 10.015 | -0.00018400 | -0.00015700 |
| 20457 | 10.326 | 10.321 | 0.99909 | 0.99862 | 0.00012500  | 1,39E-01  | 204.574.687.500.000 | 0.87772 | 0.86562 | 10.136  | 10.015 | -0.00062300 | -8,46E-01   |
| 20461 | 10.331 | 10.322 | 0.99942 | 0.99859 | 0.00013500  | -1,68E-01 | 204.607.089.843.750 | 0.87530 | 0.86492 | 10.119  | 10.015 | -0.00073200 | -8,93E-03   |
| 20464 | 10.334 | 10.324 | 0.99960 | 0.99856 | 1,64E-01    | -4,27E-01 | 204.639.492.187.500 | 0.87298 | 0.86421 | 10.102  | 10.015 | -0.00062900 | 2,81E-01    |
| 20467 | 10.332 | 10.325 | 0.99916 | 0.99853 | -0.00014700 | -3,57E-01 | 204.673.027.343.750 | 0.87115 | 0.86349 | 10.091  | 10.014 | -0.00054700 | -8,16E-02   |
| 20471 | 10.325 | 10.327 | 0.99826 | 0.99850 | -0.00021900 | -1,02E-01 | 204.705.468.750.000 | 0.86937 | 0.86279 | 10.080  | 10.014 | -0.00068300 | -7,09E-01   |
| 20474 | 10.317 | 10.329 | 0.99735 | 0.99847 | -0.00021400 | 6,44E-02  | 204.739.023.437.500 | 0.86665 | 0.86207 | 10.059  | 10.014 | -0.0010100  | -8,91E-01   |
| 20477 | 10.311 | 10.330 | 0.99649 | 0.99845 | -0.00017700 | 1,86E-01  | 204.771.484.375.000 | 0.86267 | 0.86137 | 10.026  | 10.013 | -0.0012700  | -2,28E-01   |
| 20481 | 10.306 | 10.332 | 0.99582 | 0.99843 | -9,13E-01   | 2,65E-01  | 204.805.078.125.000 | 0.85825 | 0.86066 | 0.99889 | 10.013 | -0.0011700  | 6,70E-01    |
| 20484 | 10.304 | 10.333 | 0.99551 | 0.99841 | 1,05E-02    | 1,53E-01  | 204.838.671.875.000 | 0.85484 | 0.85994 | 0.99615 | 10.013 | -0.00082100 | 0.00011500  |
| 20487 | 10.306 | 10.335 | 0.99547 | 0.99839 | 1,15E-01    | -3,38E-02 | 204.872.265.625.000 | 0.85274 | 0.85923 | 0.99473 | 10.012 | -0.00039200 | 0.00011200  |
| 20491 | 10.305 | 10.337 | 0.99523 | 0.99838 | -2,17E-01   | 4,18E-02  | 204.905.898.437.500 | 0.85220 | 0.85852 | 0.99486 | 10.012 | -6,91E-01   | 7,23E-01    |

|       |        |        |         |         |            |           |                     |         |         |         |         |             |           |
|-------|--------|--------|---------|---------|------------|-----------|---------------------|---------|---------|---------|---------|-------------|-----------|
| 20494 | 10.304 | 10.338 | 0.99496 | 0.99837 | 3,96E-01   | 1,40E-01  | 204.939.511.718.750 | 0.85227 | 0.85781 | 0.99559 | 10.011  | 9,42E-01    | 3,58E-01  |
| 20497 | 10.308 | 10.340 | 0.99514 | 0.99836 | 7,23E-01   | 4,74E-02  | 204.973.164.062.500 | 0.85284 | 0.85711 | 0.99681 | 10.011  | 0.00017200  | -4,16E-02 |
| 20501 | 10.309 | 10.342 | 0.99509 | 0.99836 | 7,15E-01   | 2,30E-03  | 205.006.816.406.250 | 0.85343 | 0.85640 | 0.99806 | 10.010  | 6,62E-01    | -3,48E-01 |
| 20504 | 10.313 | 10.344 | 0.99527 | 0.99836 | 7,38E-01   | 6,40E-02  | 205.041.601.562.500 | 0.85329 | 0.85567 | 0.99859 | 10.010  | -6,67E-01   | -3,19E-01 |
| 20508 | 10.314 | 10.345 | 0.99524 | 0.99836 | 0.00011500 | 1,86E-01  | 205.075.273.437.500 | 0.85297 | 0.85497 | 0.99892 | 10.009  | -0.00015200 | -2,54E-01 |
| 20511 | 10.321 | 10.347 | 0.99570 | 0.99837 | 0.00020200 | 2,04E-01  | 205.110.078.125.000 | 0.85225 | 0.85424 | 0.99885 | 10.008  | -0.00024100 | -2,42E-01 |
| 20514 | 10.328 | 10.349 | 0.99628 | 0.99838 | 0.00025800 | 9,98E-02  | 205.144.902.343.750 | 0.85130 | 0.85352 | 0.99856 | 10.008  | -0.00032100 | -2,11E-01 |
| 20518 | 10.338 | 10.351 | 0.99711 | 0.99839 | 0.00027000 | -1,09E-01 | 205.178.613.281.250 | 0.85005 | 0.85282 | 0.99794 | 10.007  | -0.00038500 | -1,19E-01 |
| 20521 | 10.347 | 10.353 | 0.99778 | 0.99841 | 0.00018300 | -2,72E-01 | 205.213.457.031.250 | 0.84866 | 0.85209 | 0.99720 | 10.006  | -0.00040300 | -3,26E-02 |
| 20525 | 10.351 | 10.355 | 0.99803 | 0.99844 | 8,06E-01   | -1,96E-01 | 205.248.300.781.250 | 0.84725 | 0.85137 | 0.99643 | 10.006  | -0.00040800 | 8,70E-02  |
| 20528 | 10.352 | 10.357 | 0.99799 | 0.99846 | 4,59E-01   | -8,10E-02 | 205.283.183.593.750 | 0.84582 | 0.85065 | 0.99564 | 10.005  | -0.00034200 | 3,32E-01  |
| 20532 | 10.354 | 10.359 | 0.99800 | 0.99850 | 2,32E-01   | -4,15E-02 | 205.319.179.687.500 | 0.84482 | 0.84990 | 0.99530 | 10.004  | -0.00017300 | 5,03E-01  |
| 20535 | 10.354 | 10.361 | 0.99780 | 0.99853 | 1,65E-01   | 9,60E-02  | 205.354.082.031.250 | 0.84459 | 0.84918 | 0.99570 | 10.003  | 1,47E-01    | 5,52E-01  |
| 20539 | 10.355 | 10.363 | 0.99777 | 0.99858 | 9,02E-01   | 1,46E-01  | 205.388.984.375.000 | 0.84493 | 0.84845 | 0.99665 | 10.002  | 0.00021300  | 3,73E-01  |
| 20543 | 10.360 | 10.366 | 0.99809 | 0.99862 | 0.00012000 | 5,83E-02  | 205.425.019.531.250 | 0.84611 | 0.84771 | 0.99847 | 10.001  | 0.00027900  | -2,53E-01 |
| 20546 | 10.364 | 10.368 | 0.99827 | 0.99868 | 0.00013200 | 5,11E-02  | 205.459.941.406.250 | 0.84691 | 0.84698 | 0.99988 | 0.99996 | 3,32E-01    | -7,68E-01 |

|       |        |        |         |         |             |           |                     |         |         |         |         |             |             |
|-------|--------|--------|---------|---------|-------------|-----------|---------------------|---------|---------|---------|---------|-------------|-------------|
| 20550 | 10.370 | 10.370 | 0.99868 | 0.99874 | 0.00015600  | 6,28E-03  | 205.496.015.625.000 | 0.84634 | 0.84623 | 0.99994 | 0.99983 | -0.00026600 | -6,43E-01   |
| 20553 | 10.375 | 10.373 | 0.99905 | 0.99880 | 0.00013600  | -2,69E-02 | 205.532.089.843.750 | 0.84499 | 0.84548 | 0.99922 | 0.99971 | -0.00043100 | -1,29E-01   |
| 20557 | 10.380 | 10.375 | 0.99931 | 0.99887 | 0.00013700  | 5,28E-02  | 205.568.183.593.750 | 0.84323 | 0.84473 | 0.99808 | 0.99957 | -0.00035900 | 3,86E-01    |
| 20560 | 10.385 | 10.378 | 0.99969 | 0.99895 | 0.00017400  | 2,63E-02  | 205.604.296.875.000 | 0.84240 | 0.84397 | 0.99786 | 0.99943 | -0.00015200 | 4,88E-01    |
| 20564 | 10.392 | 10.380 | 10.002  | 0.99903 | 0.00015600  | -7,80E-02 | 205.640.410.156.250 | 0.84213 | 0.84322 | 0.99820 | 0.99928 | -6,36E-02   | 3,38E-01    |
| 20568 | 10.396 | 10.383 | 10.005  | 0.99912 | 0.00011800  | -5,93E-02 | 205.676.542.968.750 | 0.84236 | 0.84246 | 0.99902 | 0.99913 | 9,14E-01    | 2,97E-01    |
| 20571 | 10.401 | 10.385 | 10.007  | 0.99922 | 0.00011300  | -3,32E-02 | 205.712.695.312.500 | 0.84279 | 0.84170 | 10.001  | 0.99897 | 0.00020900  | 4,25E-01    |
| 20575 | 10.405 | 10.388 | 10.010  | 0.99933 | 9,34E-01    | -2,25E-02 | 205.749.980.468.750 | 0.84389 | 0.84092 | 10.018  | 0.99879 | 0.00040400  | 5,41E-01    |
| 20579 | 10.408 | 10.391 | 10.011  | 0.99944 | 9,64E-01    | 5,97E-02  | 205.786.152.343.750 | 0.84576 | 0.84015 | 10.042  | 0.99861 | 0.00060600  | 3,11E-01    |
| 20582 | 10.412 | 10.394 | 10.013  | 0.99956 | 0.00013700  | 1,40E-01  | 205.823.476.562.500 | 0.84834 | 0.83936 | 10.074  | 0.99842 | 0.00063300  | -3,32E-01   |
| 20586 | 10.418 | 10.397 | 10.018  | 0.99968 | 0.00020000  | 1,02E-01  | 205.859.667.968.750 | 0.85041 | 0.83859 | 10.100  | 0.99823 | 0.00036200  | -0.00010800 |
| 20590 | 10.426 | 10.400 | 10.025  | 0.99982 | 0.00021200  | -3,90E-02 | 205.897.011.718.750 | 0.85100 | 0.83780 | 10.112  | 0.99802 | -0.00015900 | -0.00013600 |
| 20593 | 10.433 | 10.403 | 10.030  | 0.99996 | 0.00017000  | -8,46E-02 | 205.934.375.000.000 | 0.84922 | 0.83699 | 10.100  | 0.99780 | -0.00065500 | -1,00E+00   |
| 20597 | 10.439 | 10.406 | 10.034  | 10.001  | 0.00014900  | -8,49E-02 | 205.971.738.281.250 | 0.84611 | 0.83619 | 10.075  | 0.99758 | -0.00090700 | -5,08E-01   |
| 20601 | 10.445 | 10.410 | 10.038  | 10.003  | 0.00010700  | -2,33E-01 | 206.009.121.093.750 | 0.84244 | 0.83538 | 10.044  | 0.99734 | -0.0010300  | -3,16E-01   |
| 20605 | 10.447 | 10.413 | 10.039  | 10.004  | -2,53E-01   | -2,83E-01 | 206.046.523.437.500 | 0.83838 | 0.83457 | 10.009  | 0.99709 | -0.0011400  | -1,57E-01   |
| 20608 | 10.443 | 10.416 | 10.033  | 10.006  | -0.00010500 | -7,48E-02 | 206.083.925.781.250 | 0.83389 | 0.83375 | 0.99698 | 0.99684 | -0.0011500  | 3,04E-01    |

|       |        |        |        |        |           |           |                     |         |         |         |         |             |           |
|-------|--------|--------|--------|--------|-----------|-----------|---------------------|---------|---------|---------|---------|-------------|-----------|
| 20612 | 10.439 | 10.420 | 10.027 | 10.008 | -8,21E-01 | 3,86E-02  | 206.122.480.468.750 | 0.82962 | 0.83291 | 0.99328 | 0.99656 | -0.00091200 | 8,32E-01  |
| 20616 | 10.436 | 10.423 | 10.023 | 10.010 | -7,54E-01 | 3,47E-02  | 206.159.921.875.000 | 0.82696 | 0.83208 | 0.99117 | 0.99629 | -0.00052000 | 8,80E-01  |
| 20620 | 10.433 | 10.427 | 10.018 | 10.012 | -5,57E-01 | 6,36E-02  | 206.198.515.625.000 | 0.82567 | 0.83123 | 0.99044 | 0.99599 | -0.00024300 | 4,70E-01  |
| 20624 | 10.432 | 10.431 | 10.016 | 10.014 | -2,71E-01 | 7,57E-02  | 206.235.976.562.500 | 0.82511 | 0.83039 | 0.99041 | 0.99569 | -0.00016200 | 1,58E-02  |
| 20627 | 10.431 | 10.435 | 10.013 | 10.017 | 1,86E-02  | 5,56E-02  | 206.274.589.843.750 | 0.82444 | 0.82952 | 0.99029 | 0.99538 | -0.00023100 | -2,50E-01 |
| 20631 | 10.432 | 10.439 | 10.013 | 10.019 | 1,59E-01  | -2,79E-02 | 206.313.222.656.250 | 0.82332 | 0.82865 | 0.98972 | 0.99505 | -0.00035500 | -3,27E-01 |
| 20635 | 10.433 | 10.443 | 10.011 | 10.022 | -1,97E-01 | -7,17E-02 | 206.351.875.000.000 | 0.82169 | 0.82777 | 0.98862 | 0.99470 | -0.00048400 | -1,83E-01 |
| 20639 | 10.431 | 10.447 | 10.008 | 10.024 | -3,96E-01 | 1,27E-02  | 206.390.527.343.750 | 0.81958 | 0.82688 | 0.98704 | 0.99435 | -0.00049700 | 2,65E-01  |
| 20643 | 10.430 | 10.452 | 10.005 | 10.027 | -9,89E-02 | 1,21E-01  | 206.429.218.750.000 | 0.81785 | 0.82599 | 0.98584 | 0.99398 | -0.00028000 | 7,03E-01  |
| 20647 | 10.430 | 10.456 | 10.004 | 10.030 | 5,42E-01  | 8,68E-02  | 206.467.910.156.250 | 0.81742 | 0.82509 | 0.98592 | 0.99360 | 4,73E-01    | 7,17E-01  |
| 20651 | 10.434 | 10.461 | 10.006 | 10.033 | 5,73E-01  | -1,57E-02 | 206.506.601.562.500 | 0.81822 | 0.82419 | 0.98724 | 0.99321 | 0.00027500  | 3,88E-01  |
| 20655 | 10.435 | 10.465 | 10.005 | 10.036 | 4,19E-01  | -3,62E-02 | 206.546.464.843.750 | 0.81958 | 0.82325 | 0.98912 | 0.99279 | 0.00035200  | -2,60E-02 |
| 20659 | 10.437 | 10.470 | 10.006 | 10.039 | 2,89E-01  | -2,13E-02 | 206.585.195.312.500 | 0.82098 | 0.82232 | 0.99103 | 0.99237 | 0.00025500  | -2,64E-01 |
| 20663 | 10.437 | 10.475 | 10.004 | 10.043 | 2,51E-01  | 3,20E-02  | 206.625.078.125.000 | 0.82158 | 0.82137 | 0.99214 | 0.99192 | 0.00014400  | -1,49E-01 |
| 20666 | 10.439 | 10.480 | 10.005 | 10.046 | 5,40E-01  | 7,45E-02  | 206.663.847.656.250 | 0.82212 | 0.82043 | 0.99316 | 0.99147 | 0.00013800  | -1,63E-02 |
