# Supplementary material
Source: PubMed Central journal article supplement (PMC8325642)
Supplement: NIHMS1698257-supplement-Fig__4A__Trioxo.pdf [file NIHMS1698257-supplement-Fig__4A__Trioxo.pdf]

| Energy              | Trioxo | nbkg        | Flat        | fbkg        | nder        | nsec      | H         | Energy | Mo Foil | nbkg        | flat        | fbkg        | nder        | nsec      |           |
|---------------------|--------|-------------|-------------|-------------|-------------|-----------|-----------|--------|---------|-------------|-------------|-------------|-------------|-----------|-----------|
| 196.905.292.968.750 |        | 0.0016200   | 0.0016200   | 0.0016200   | 0.0016200   | -2,86E-01 | 3,36E-03  | 19691  |         | 0.0017100   | 0.0017100   | 0.0017100   | 0.0017100   | -6,45E-01 | 6,70E-02  |
| 196.944.589.843.750 |        | 0.0015100   | 0.0015100   | 0.0015100   | 0.0015100   | -2,73E-01 | 4,89E-03  | 19694  |         | 0.0014600   | 0.0014600   | 0.0014600   | 0.0014600   | -3,82E-01 | 5,39E-02  |
| 196.984.921.875.000 |        | 0.0014000   | 0.0014000   | 0.0014000   | 0.0014000   | -2,47E-01 | 4,42E-03  | 19698  |         | 0.0014100   | 0.0014100   | 0.0014100   | 0.0014100   | -2,16E-01 | 1,07E-02  |
| 197.025.273.437.500 |        | 0.0013100   | 0.0013100   | 0.0013100   | 0.0013100   | -2,37E-01 | -1,67E-03 | 19703  |         | 0.0012900   | 0.0012900   | 0.0012900   | 0.0012900   | -2,95E-01 | -5,62E-03 |
| 197.064.628.906.250 |        | 0.0012100   | 0.0012100   | 0.0012100   | 0.0012100   | -2,61E-01 | -4,33E-03 | 19706  |         | 0.0011700   | 0.0011700   | 0.0011700   | 0.0011700   | -2,61E-01 | 4,98E-03  |
| 197.105.019.531.250 |        | 0.0011000   | 0.0011000   | 0.0011000   | 0.0011000   | -2,72E-01 | 2,07E-03  | 19711  |         | 0.0010800   | 0.0010800   | 0.0010800   | 0.0010800   | -2,56E-01 | 6,88E-03  |
| 197.145.429.687.500 |        | 0.00099200  | 0.00099200  | 0.00099200  | 0.00099200  | -2,44E-01 | 4,79E-03  | 19715  |         | 0.00096800  | 0.00096800  | 0.00096800  | 0.00096800  | -2,05E-01 | 5,09E-03  |
| 197.184.804.687.500 |        | 0.00090400  | 0.00090400  | 0.00090400  | 0.00090400  | -2,34E-01 | 1,30E-03  | 19718  |         | 0.00091400  | 0.00091400  | 0.00091400  | 0.00091400  | -2,15E-01 | -1,01E-02 |
| 197.225.253.906.250 |        | 0.00080600  | 0.00080600  | 0.00080600  | 0.00080600  | -2,34E-01 | 5,02E-04  | 19723  |         | 0.00079600  | 0.00079600  | 0.00079600  | 0.00079600  | -2,85E-01 | 3,01E-03  |
| 197.264.667.968.750 |        | 0.00071700  | 0.00071700  | 0.00071700  | 0.00071700  | -2,30E-01 | -2,89E-03 | 19726  |         | 0.00068700  | 0.00068700  | 0.00068700  | 0.00068700  | -1,91E-01 | 1,66E-02  |
| 197.305.156.250.000 |        | 0.00062200  | 0.00062200  | 0.00062200  | 0.00062200  | -2,57E-01 | -1,49E-03 | 19731  |         | 0.00064400  | 0.00064400  | 0.00064400  | 0.00064400  | -1,53E-01 | 8,74E-05  |
| 197.344.609.375.000 |        | 0.00051200  | 0.00051200  | 0.00051200  | 0.00051200  | -2,42E-01 | 3,47E-03  | 19734  |         | 0.00056400  | 0.00056400  | 0.00056400  | 0.00056400  | -1,90E-01 | -8,93E-03 |
| 197.385.117.187.500 |        | 0.00042900  | 0.00042900  | 0.00042900  | 0.00042900  | -2,29E-01 | -3,30E-03 | 19739  |         | 0.00049100  | 0.00049100  | 0.00049100  | 0.00049100  | -2,24E-01 | -4,13E-03 |
| 197.424.589.843.750 |        | 0.00032900  | 0.00032900  | 0.00032900  | 0.00032900  | -2,68E-01 | 1,92E-05  | 19742  |         | 0.00038500  | 0.00038500  | 0.00038500  | 0.00038500  | -2,23E-01 | 3,41E-03  |
| 197.465.136.718.750 |        | 0.00021400  | 0.00021400  | 0.00021400  | 0.00021400  | -2,29E-01 | 8,34E-03  | 19747  |         | 0.00031300  | 0.00031300  | 0.00031300  | 0.00031300  | -1,97E-01 | 5,95E-04  |
| 197.504.648.437.500 |        | 0.00014600  | 0.00014600  | 0.00014600  | 0.00014600  | -2,01E-01 | 3,50E-03  | 19750  |         | 0.00022800  | 0.00022800  | 0.00022800  | 0.00022800  | -2,18E-01 | -2,34E-03 |
| 197.545.234.375.000 |        | 5,33E-01    | 5,33E-01    | 5,33E-01    | 5,33E-01    | -2,01E-01 | -1,55E-03 | 19755  |         | 0.00013800  | 0.00013800  | 0.00013800  | 0.00013800  | -2,16E-01 | 1,24E-02  |
| 197.584.785.156.250 |        | -1,47E-01   | -1,47E-01   | -1,47E-01   | -1,47E-01   | -2,14E-01 | 7,04E-04  | 19758  |         | 5,50E-01    | 5,50E-01    | 5,50E-01    | 5,50E-01    | -1,19E-01 | 7,72E-03  |
| 197.625.390.625.000 |        | -0.00011800 | -0.00011800 | -0.00011800 | -0.00011800 | -1,95E-01 | 6,51E-03  | 19763  |         | 4,26E-01    | 4,26E-01    | 4,26E-01    | 4,26E-01    | -1,54E-01 | -1,46E-02 |
| 197.664.980.468.750 |        | -0.00017100 | -0.00017100 | -0.00017100 | -0.00017100 | -1,61E-01 | -7,59E-04 | 19766  |         | -6,82E-01   | -6,82E-01   | -6,82E-01   | -6,82E-01   | -2,36E-01 | -2,93E-03 |
| 197.704.570.312.500 |        | -0.00024600 | -0.00024600 | -0.00024600 | -0.00024600 | -2,01E-01 | -5,34E-03 | 19770  |         | -0.00014400 | -0.00014400 | -0.00014400 | -0.00014400 | -1,77E-01 | 1,13E-02  |
| 197.745.234.375.000 |        | -0.00033200 | -0.00033200 | -0.00033200 | -0.00033200 | -2,04E-01 | -1,18E-03 | 19775  |         | -0.00021000 | -0.00021000 | -0.00021000 | -0.00021000 | -1,45E-01 | -5,25E-05 |
| 197.784.863.281.250 |        | -0.00041000 | -0.00041000 | -0.00041000 | -0.00041000 | -2,11E-01 | 1,69E-03  | 19778  |         | -0.00026000 | -0.00026000 | -0.00026000 | -0.00026000 | -1,77E-01 | -6,52E-03 |
| 197.824.511.718.750 |        | -0.00049900 | -0.00049900 | -0.00049900 | -0.00049900 | -1,91E-01 | 6,64E-03  | 19782  |         | -0.00035100 | -0.00035100 | -0.00035100 | -0.00035100 | -1,96E-01 | 3,27E-03  |
| 197.865.214.843.750 |        | -0.00056300 | -0.00056300 | -0.00056300 | -0.00056300 | -1,57E-01 | 4,12E-03  | 19787  |         | -0.00041800 | -0.00041800 | -0.00041800 | -0.00041800 | -1,51E-01 | 1,04E-02  |
| 197.904.902.343.750 |        | -0.00062600 | -0.00062600 | -0.00062600 | -0.00062600 | -1,58E-01 | -2,07E-03 | 19790  |         | -0.00047200 | -0.00047200 | -0.00047200 | -0.00047200 | -1,13E-01 | 5,24E-03  |
| 197.944.589.843.750 |        | -0.00068900 | -0.00068900 | -0.00068900 | -0.00068900 | -1,74E-01 | -3,56E-03 | 19794  |         | -0.00050700 | -0.00050700 | -0.00050700 | -0.00050700 | -1,09E-01 | -3,21E-03 |
| 197.985.351.562.500 |        | -0.00076500 | -0.00076500 | -0.00076500 | -0.00076500 | -1,87E-01 | 1,39E-05  | 19799  |         | -0.00056000 | -0.00056000 | -0.00056000 | -0.00056000 | -1,39E-01 | -7,77E-03 |
| 198.025.078.125.000 |        | -0.00083900 | -0.00083900 | -0.00083900 | -0.00083900 | -1,73E-01 | 7,13E-03  | 19803  |         | -0.00061900 | -0.00061900 | -0.00061900 | -0.00061900 | -1,72E-01 | -2,21E-04 |
| 198.064.824.218.750 |        | -0.00090300 | -0.00090300 | -0.00090300 | -0.00090300 | -1,30E-01 | 8,75E-03  | 19806  |         | -0.00069700 | -0.00069700 | -0.00069700 | -0.00069700 | -1,40E-01 | 6,35E-03  |
| 198.104.589.843.750 |        | -0.00094200 | -0.00094200 | -0.00094200 | -0.00094200 | -1,04E-01 | 2,72E-03  | 19810  |         | -0.00073000 | -0.00073000 | -0.00073000 | -0.00073000 | -1,21E-01 | -9,53E-04 |
| 198.145.410.156.250 |        | -0.00098700 | -0.00098700 | -0.00098700 | -0.00098700 | -1,08E-01 | -2,52E-03 | 19815  |         | -0.00079400 | -0.00079400 | -0.00079400 | -0.00079400 | -1,48E-01 | 5,82E-03  |
| 198.185.214.843.750 |        | -0.0010300  | -0.0010300  | -0.0010300  | -0.0010300  | -1,24E-01 | -5,52E-03 | 19819  |         | -0.00085000 | -0.00085000 | -0.00085000 | -0.00085000 | -7,45E-02 | 4,01E-03  |
| 198.225.019.531.250 |        | -0.0010900  | -0.0010900  | -0.0010900  | -0.0010900  | -1,52E-01 | 7,94E-04  | 19823  |         | -0.00085400 | -0.00085400 | -0.00085400 | -0.00085400 | -1,16E-01 | -1,49E-02 |

|                     |             |             |             |             |            |           |       |             |             |             |             |            |           |
|---------------------|-------------|-------------|-------------|-------------|------------|-----------|-------|-------------|-------------|-------------|-------------|------------|-----------|
| 198.264.843.750.000 | -0.0011500  | -0.0011500  | -0.0011500  | -0.0011500  | -1,18E-01  | 1,21E-02  | 19826 | -0.00094200 | -0.00094200 | -0.00094200 | -0.00094200 | -1,93E-01  | 2,73E-03  |
| 198.304.687.500.000 | -0.0011800  | -0.0011800  | -0.0011800  | -0.0011800  | -5,53E-02  | 8,32E-03  | 19830 | -0.0010100  | -0.0010100  | -0.0010100  | -0.0010100  | -9,43E-02  | 1,53E-02  |
| 198.344.550.781.250 | -0.0011900  | -0.0011900  | -0.0011900  | -0.0011900  | -5,16E-02  | -2,65E-03 | 19834 | -0.0010200  | -0.0010200  | -0.0010200  | -0.0010200  | -7,10E-02  | -2,51E-03 |
| 198.385.468.750.000 | -0.0012200  | -0.0012200  | -0.0012200  | -0.0012200  | -7,67E-02  | -2,88E-03 | 19839 | -0.0010600  | -0.0010600  | -0.0010600  | -0.0010600  | -1,15E-01  | -9,50E-04 |
| 198.425.371.093.750 | -0.0012600  | -0.0012600  | -0.0012600  | -0.0012600  | -7,49E-02  | 3,24E-03  | 19843 | -0.0011100  | -0.0011100  | -0.0011100  | -0.0011100  | -7,87E-02  | 9,08E-03  |
| 198.465.273.437.500 | -0.0012800  | -0.0012800  | -0.0012800  | -0.0012800  | -5,09E-02  | 6,01E-03  | 19847 | -0.0011300  | -0.0011300  | -0.0011300  | -0.0011300  | -4,22E-02  | 5,70E-03  |
| 198.505.195.312.500 | -0.0013000  | -0.0013000  | -0.0013000  | -0.0013000  | -2,70E-02  | 9,97E-03  | 19851 | -0.0011400  | -0.0011400  | -0.0011400  | -0.0011400  | -3,32E-02  | -1,01E-02 |
| 198.545.136.718.750 | -0.0013000  | -0.0013000  | -0.0013000  | -0.0013000  | 2,88E-02   | 8,55E-03  | 19855 | -0.0011500  | -0.0011500  | -0.0011500  | -0.0011500  | -1,23E-01  | -1,28E-02 |
| 198.585.097.656.250 | -0.0012700  | -0.0012700  | -0.0012700  | -0.0012700  | 4,13E-02   | 5,43E-04  | 19859 | -0.0012400  | -0.0012400  | -0.0012400  | -0.0012400  | -1,35E-01  | 1,15E-02  |
| 198.625.078.125.000 | -0.0012700  | -0.0012700  | -0.0012700  | -0.0012700  | 3,31E-02   | 5,62E-03  | 19863 | -0.0012600  | -0.0012600  | -0.0012600  | -0.0012600  | -3,11E-02  | 2,26E-02  |
| 198.665.058.593.750 | -0.0012500  | -0.0012500  | -0.0012500  | -0.0012500  | 8,62E-02   | 9,35E-03  | 19867 | -0.0012700  | -0.0012700  | -0.0012700  | -0.0012700  | 4,49E-02   | 1,44E-02  |
| 198.705.078.125.000 | -0.0012000  | -0.0012000  | -0.0012000  | -0.0012000  | 1,08E-01   | 4,35E-03  | 19871 | -0.0012300  | -0.0012300  | -0.0012300  | -0.0012300  | 8,44E-02   | 6,55E-03  |
| 198.745.097.656.250 | -0.0011600  | -0.0011600  | -0.0011600  | -0.0011600  | 1,21E-01   | 7,56E-03  | 19875 | -0.0012000  | -0.0012000  | -0.0012000  | -0.0012000  | 9,73E-02   | -4,43E-03 |
| 198.785.136.718.750 | -0.0011000  | -0.0011000  | -0.0011000  | -0.0011000  | 1,68E-01   | 6,12E-03  | 19879 | -0.0011500  | -0.0011500  | -0.0011500  | -0.0011500  | 4,89E-02   | -7,83E-03 |
| 198.825.195.312.500 | -0.0010300  | -0.0010300  | -0.0010300  | -0.0010300  | 1,70E-01   | 3,02E-03  | 19883 | -0.0011600  | -0.0011600  | -0.0011600  | -0.0011600  | 3,46E-02   | 8,59E-03  |
| 198.865.253.906.250 | -0.00096800 | -0.00096800 | -0.00096800 | -0.00096800 | 1,93E-01   | 1,76E-02  | 19887 | -0.0011200  | -0.0011200  | -0.0011200  | -0.0011200  | 1,18E-01   | 1,94E-02  |
| 198.905.351.562.500 | -0.00087200 | -0.00087200 | -0.00087200 | -0.00087200 | 3,11E-01   | 2,05E-02  | 19891 | -0.0010700  | -0.0010700  | -0.0010700  | -0.0010700  | 1,90E-01   | 1,69E-02  |
| 198.945.449.218.750 | -0.00071800 | -0.00071800 | -0.00071800 | -0.00071800 | 3,57E-01   | 1,91E-03  | 19895 | -0.00096800 | -0.00096800 | -0.00096800 | -0.00096800 | 2,53E-01   | 1,01E-02  |
| 198.984.511.718.750 | -0.00058900 | -0.00058900 | -0.00058900 | -0.00058900 | 3,26E-01   | 3,55E-04  | 19898 | -0.00086500 | -0.00086500 | -0.00086500 | -0.00086500 | 2,70E-01   | 4,61E-03  |
| 199.024.667.968.750 | -0.00045900 | -0.00045900 | -0.00045900 | -0.00045900 | 3,60E-01   | 1,16E-02  | 19902 | -0.00075500 | -0.00075500 | -0.00075500 | -0.00075500 | 2,90E-01   | 1,59E-02  |
| 199.064.804.687.500 | -0.00030000 | -0.00030000 | -0.00030000 | -0.00030000 | 4,20E-01   | 2,19E-02  | 19906 | -0.00063200 | -0.00063200 | -0.00063200 | -0.00063200 | 3,97E-01   | 2,18E-02  |
| 199.104.980.468.750 | -0.00012200 | -0.00012200 | -0.00012200 | -0.00012200 | 5,36E-01   | 2,07E-02  | 19910 | -0.00043600 | -0.00043600 | -0.00043600 | -0.00043600 | 4,65E-01   | 1,08E-02  |
| 199.145.175.781.250 | 0.00013100  | 0.00013100  | 0.00013100  | 0.00013100  | 5,87E-01   | 1,23E-02  | 19915 | -0.00025900 | -0.00025900 | -0.00025900 | -0.00025900 | 4,84E-01   | 1,47E-02  |
| 199.185.371.093.750 | 0.00034900  | 0.00034900  | 0.00034900  | 0.00034900  | 6,35E-01   | 2,75E-02  | 19919 | -4,66E-01   | -4,66E-01   | -4,66E-01   | -4,66E-01   | 5,83E-01   | 2,63E-02  |
| 199.224.531.250.000 | 0.00063400  | 0.00063400  | 0.00063400  | 0.00063400  | 8,05E-01   | 3,34E-02  | 19922 | 0.00020400  | 0.00020400  | 0.00020400  | 0.00020400  | 6,93E-01   | 2,57E-02  |
| 199.264.765.625.000 | 0.00098900  | 0.00098900  | 0.00098900  | 0.00098900  | 9,00E-01   | 2,84E-02  | 19926 | 0.00050400  | 0.00050400  | 0.00050400  | 0.00050400  | 7,87E-01   | 2,53E-02  |
| 199.305.019.531.250 | 0.0013600   | 0.0013600   | 0.0013600   | 0.0013600   | 0.00010300 | 3,91E-02  | 19931 | 0.00083700  | 0.00083700  | 0.00083700  | 0.00083700  | 8,96E-01   | 3,92E-02  |
| 199.345.292.968.750 | 0.0018200   | 0.0018200   | 0.0018200   | 0.0018200   | 0.00012100 | 4,51E-02  | 19935 | 0.0012300   | 0.0012300   | 0.0012300   | 0.0012300   | 0.00011000 | 5,48E-02  |
| 199.384.511.718.750 | 0.0023200   | 0.0023200   | 0.0023200   | 0.0023200   | 0.00013900 | 4,85E-02  | 19938 | 0.0017100   | 0.0017100   | 0.0017100   | 0.0017100   | 0.00013300 | 5,06E-02  |
| 199.424.804.687.500 | 0.0029300   | 0.0029300   | 0.0029300   | 0.0029300   | 0.00016000 | 5,36E-02  | 19942 | 0.0022800   | 0.0022800   | 0.0022800   | 0.0022800   | 0.00015000 | 5,66E-02  |
| 199.465.136.718.750 | 0.0036100   | 0.0036100   | 0.0036100   | 0.0036100   | 0.00018200 | 7,45E-02  | 19947 | 0.0029300   | 0.0029300   | 0.0029300   | 0.0029300   | 0.00017900 | 8,90E-02  |
| 199.505.468.750.000 | 0.0044000   | 0.0044000   | 0.0044000   | 0.0044000   | 0.00022000 | 1,08E-01  | 19951 | 0.0037300   | 0.0037300   | 0.0037300   | 0.0037300   | 0.00022200 | 1,13E-01  |
| 199.544.746.093.750 | 0.0053700   | 0.0053700   | 0.0053700   | 0.0053700   | 0.00026900 | 1,30E-01  | 19954 | 0.0047000   | 0.0047000   | 0.0047000   | 0.0047000   | 0.00026900 | 1,27E-01  |
| 199.585.117.187.500 | 0.0065400   | 0.0065400   | 0.0065400   | 0.0065400   | 0.00032300 | 1,49E-01  | 19959 | 0.0058700   | 0.0058700   | 0.0058700   | 0.0058700   | 0.00032400 | 1,65E-01  |
| 199.625.507.812.500 | 0.0079800   | 0.0079800   | 0.0079800   | 0.0079800   | 0.00038800 | 2,01E-01  | 19963 | 0.0073100   | 0.0073100   | 0.0073100   | 0.0073100   | 0.00040200 | 2,35E-01  |

|                     |           |           |           |           |            |            |       |           |           |           |           |            |            |
|---------------------|-----------|-----------|-----------|-----------|------------|------------|-------|-----------|-----------|-----------|-----------|------------|------------|
| 199.664.843.750.000 | 0.0096300 | 0.0096300 | 0.0096300 | 0.0096300 | 0.00048400 | 2,87E-01   | 19966 | 0.0090800 | 0.0090800 | 0.0090800 | 0.0090800 | 0.00051100 | 3,33E-01   |
| 199.705.253.906.250 | 0.011800  | 0.011800  | 0.011800  | 0.011800  | 0.00061700 | 4,09E-01   | 19971 | 0.011400  | 0.011400  | 0.011400  | 0.011400  | 0.00066800 | 5,03E-01   |
| 199.744.628.906.250 | 0.014600  | 0.014600  | 0.014600  | 0.014600  | 0.00081000 | 6,11E-01   | 19974 | 0.014400  | 0.014400  | 0.014400  | 0.014400  | 0.00091200 | 7,75E-01   |
| 199.785.078.125.000 | 0.018300  | 0.018300  | 0.018300  | 0.018300  | 0.0011100  | 0.00010200 | 19979 | 0.018700  | 0.018700  | 0.018700  | 0.018700  | 0.0012900  | 0.00013600 |
| 199.824.472.656.250 | 0.023400  | 0.023400  | 0.023400  | 0.023400  | 0.0016300  | 0.00018800 | 19982 | 0.024700  | 0.024700  | 0.024700  | 0.024700  | 0.0020000  | 0.00027800 |
| 199.864.960.937.500 | 0.031300  | 0.031300  | 0.031300  | 0.031300  | 0.0026100  | 0.00020900 | 19986 | 0.034600  | 0.034600  | 0.034600  | 0.034600  | 0.0035100  | 0.00032500 |
| 199.905.449.218.750 | 0.044500  | 0.044500  | 0.044500  | 0.044500  | 0.0033200  | 0.00049600 | 19991 | 0.053100  | 0.053100  | 0.053100  | 0.053100  | 0.0046300  | 0.00080300 |
| 199.907.578.125.000 | 0.045400  | 0.045400  | 0.045400  | 0.045400  | 0.0047200  | 0.0029900  | 19991 | 0.054400  | 0.054400  | 0.054400  | 0.054400  | 0.0069300  | 0.0053300  |
| 199.910.781.250.000 | 0.047000  | 0.047000  | 0.047000  | 0.047000  | 0.0049100  | 0.00049700 | 19991 | 0.056800  | 0.056800  | 0.056800  | 0.056800  | 0.0074700  | 0.0013700  |
| 199.913.984.375.000 | 0.048600  | 0.048600  | 0.048600  | 0.048600  | 0.0050400  | 0.00091800 | 19991 | 0.059100  | 0.059100  | 0.059100  | 0.059100  | 0.0078000  | 0.0019900  |
| 199.917.167.968.750 | 0.050300  | 0.050300  | 0.050300  | 0.050300  | 0.0055000  | 0.0011300  | 19992 | 0.061700  | 0.061700  | 0.061700  | 0.061700  | 0.0087400  | 0.0027500  |
| 199.920.371.093.750 | 0.052100  | 0.052100  | 0.052100  | 0.052100  | 0.0057600  | 0.0010900  | 19992 | 0.064700  | 0.064700  | 0.064700  | 0.064700  | 0.0095600  | 0.0028800  |
| 199.922.500.000.000 | 0.053300  | 0.053300  | 0.053300  | 0.053300  | 0.0060800  | 0.0012700  | 19992 | 0.066800  | 0.066800  | 0.066800  | 0.066800  | 0.010300   | 0.0027900  |
| 199.925.703.125.000 | 0.055300  | 0.055300  | 0.055300  | 0.055300  | 0.0064400  | 0.0013400  | 19993 | 0.070200  | 0.070200  | 0.070200  | 0.070200  | 0.011000   | 0.0030500  |
| 199.928.906.250.000 | 0.057500  | 0.057500  | 0.057500  | 0.057500  | 0.0069400  | 0.0014900  | 19993 | 0.073900  | 0.073900  | 0.073900  | 0.073900  | 0.012200   | 0.0036700  |
| 199.932.109.375.000 | 0.059800  | 0.059800  | 0.059800  | 0.059800  | 0.0074000  | 0.0016900  | 19993 | 0.078000  | 0.078000  | 0.078000  | 0.078000  | 0.013400   | 0.0041300  |
| 199.935.292.968.750 | 0.062200  | 0.062200  | 0.062200  | 0.062200  | 0.0080100  | 0.0019800  | 19994 | 0.082500  | 0.082500  | 0.082500  | 0.082500  | 0.014900   | 0.0046800  |
| 199.938.496.093.750 | 0.064900  | 0.064900  | 0.064900  | 0.064900  | 0.0086600  | 0.0025600  | 19994 | 0.087500  | 0.087500  | 0.087500  | 0.087500  | 0.016400   | 0.0064400  |
| 199.940.625.000.000 | 0.066800  | 0.066800  | 0.066800  | 0.066800  | 0.0093800  | 0.0025900  | 19994 | 0.091200  | 0.091200  | 0.091200  | 0.091200  | 0.018300   | 0.0070100  |
| 199.943.828.125.000 | 0.069900  | 0.069900  | 0.069900  | 0.069900  | 0.0100000  | 0.0028800  | 19994 | 0.097300  | 0.097300  | 0.097300  | 0.097300  | 0.020100   | 0.0069500  |
| 199.947.031.250.000 | 0.073200  | 0.073200  | 0.073200  | 0.073200  | 0.011200   | 0.0034700  | 19995 | 0.10411   | 0.10411   | 0.10411   | 0.10411   | 0.022800   | 0.0076100  |
| 199.950.234.375.000 | 0.077100  | 0.077100  | 0.077100  | 0.077100  | 0.012300   | 0.0027700  | 19995 | 0.11186   | 0.11186   | 0.11186   | 0.11186   | 0.025000   | 0.0060500  |
| 199.953.437.500.000 | 0.081100  | 0.081100  | 0.081100  | 0.081100  | 0.013000   | 0.0041900  | 19995 | 0.12013   | 0.12013   | 0.12013   | 0.12013   | 0.026600   | 0.0084800  |
| 199.955.566.406.250 | 0.084000  | 0.084000  | 0.084000  | 0.084000  | 0.014500   | 0.0049400  | 19996 | 0.12607   | 0.12607   | 0.12607   | 0.12607   | 0.029500   | 0.0089200  |
| 199.958.769.531.250 | 0.088800  | 0.088800  | 0.088800  | 0.088800  | 0.015600   | 0.0044300  | 19996 | 0.13587   | 0.13587   | 0.13587   | 0.13587   | 0.031400   | 0.0064200  |
| 199.961.953.125.000 | 0.094000  | 0.094000  | 0.094000  | 0.094000  | 0.017300   | 0.0064800  | 19996 | 0.14610   | 0.14610   | 0.14610   | 0.14610   | 0.033600   | 0.0079200  |
| 199.965.156.250.000 | 0.099900  | 0.099900  | 0.099900  | 0.099900  | 0.019800   | 0.0071300  | 19997 | 0.15735   | 0.15735   | 0.15735   | 0.15735   | 0.036400   | 0.0079800  |
| 199.968.359.375.000 | 0.10665   | 0.10665   | 0.10665   | 0.10665   | 0.021900   | 0.0091400  | 19997 | 0.16946   | 0.16946   | 0.16946   | 0.16946   | 0.038700   | 0.0081900  |
| 199.970.488.281.250 | 0.11158   | 0.11158   | 0.11158   | 0.11158   | 0.024600   | 0.0092700  | 19997 | 0.17800   | 0.17800   | 0.17800   | 0.17800   | 0.040800   | 0.0056700  |
| 199.973.691.406.250 | 0.11979   | 0.11979   | 0.11979   | 0.11979   | 0.026800   | 0.0082400  | 19997 | 0.19121   | 0.19121   | 0.19121   | 0.19121   | 0.041800   | 0.0039300  |
| 199.976.894.531.250 | 0.12876   | 0.12876   | 0.12876   | 0.12876   | 0.029900   | 0.010700   | 19998 | 0.20473   | 0.20473   | 0.20473   | 0.20473   | 0.043300   | 0.0050600  |
| 199.980.097.656.250 | 0.13896   | 0.13896   | 0.13896   | 0.13896   | 0.033700   | 0.011600   | 19998 | 0.21898   | 0.21898   | 0.21898   | 0.21898   | 0.045000   | 0.0039700  |
| 199.983.300.781.250 | 0.15035   | 0.15035   | 0.15035   | 0.15035   | 0.037300   | 0.011500   | 19998 | 0.23358   | 0.23358   | 0.23358   | 0.23358   | 0.045900   | 0.0034000  |
| 199.986.503.906.250 | 0.16285   | 0.16285   | 0.16285   | 0.16285   | 0.041000   | 0.017800   | 19999 | 0.24834   | 0.24834   | 0.24834   | 0.24834   | 0.047200   | 0.0069000  |
| 199.988.632.812.500 | 0.17221   | 0.17221   | 0.17221   | 0.17221   | 0.046800   | 0.016200   | 19999 | 0.25872   | 0.25872   | 0.25872   | 0.25872   | 0.049600   | 0.0035200  |

|                     |         |         |         |         |             |            |       |         |         |         |         |          |             |
|---------------------|---------|---------|---------|---------|-------------|------------|-------|---------|---------|---------|---------|----------|-------------|
| 199.991.835.937.500 | 0.18786 | 0.18786 | 0.18786 | 0.18786 | 0.049700    | 0.010400   | 19999 | 0.27480 | 0.27480 | 0.27480 | 0.27480 | 0.049100 | -0.0014700  |
| 199.995.039.062.500 | 0.20404 | 0.20404 | 0.20404 | 0.20404 | 0.053500    | 0.013900   | 20000 | 0.29017 | 0.29017 | 0.29017 | 0.29017 | 0.048600 | 0.00036200  |
| 199.998.222.656.250 | 0.22197 | 0.22197 | 0.22197 | 0.22197 | 0.058600    | 0.012300   | 20000 | 0.30582 | 0.30582 | 0.30582 | 0.30582 | 0.049300 | 0.00034100  |
| 200.001.425.781.250 | 0.24146 | 0.24146 | 0.24146 | 0.24146 | 0.061300    | 0.010500   | 20000 | 0.32167 | 0.32167 | 0.32167 | 0.32167 | 0.048800 | -0.0028500  |
| 200.003.574.218.750 | 0.25477 | 0.25477 | 0.25477 | 0.25477 | 0.064200    | 0.012100   | 20000 | 0.33194 | 0.33194 | 0.33194 | 0.33194 | 0.047800 | -0.0014300  |
| 200.006.777.343.750 | 0.27580 | 0.27580 | 0.27580 | 0.27580 | 0.067800    | 0.0089900  | 20001 | 0.34722 | 0.34722 | 0.34722 | 0.34722 | 0.048100 | -0.00025300 |
| 200.009.960.937.500 | 0.29806 | 0.29806 | 0.29806 | 0.29806 | 0.069900    | 0.0020300  | 20001 | 0.36265 | 0.36265 | 0.36265 | 0.36265 | 0.047600 | -0.0033600  |
| 200.013.164.062.500 | 0.32041 | 0.32041 | 0.32041 | 0.32041 | 0.069000    | -0.0021200 | 20001 | 0.37759 | 0.37759 | 0.37759 | 0.37759 | 0.045900 | -0.0034900  |
| 200.016.367.187.500 | 0.34232 | 0.34232 | 0.34232 | 0.34232 | 0.068600    | -0.0052500 | 20002 | 0.39209 | 0.39209 | 0.39209 | 0.39209 | 0.045400 | -0.0029300  |
| 200.018.515.625.000 | 0.35716 | 0.35716 | 0.35716 | 0.35716 | 0.066200    | -0.011700  | 20002 | 0.40191 | 0.40191 | 0.40191 | 0.40191 | 0.044400 | -0.0047300  |
| 200.021.699.218.750 | 0.37762 | 0.37762 | 0.37762 | 0.37762 | 0.062300    | -0.011600  | 20002 | 0.41573 | 0.41573 | 0.41573 | 0.41573 | 0.042800 | -0.0031400  |
| 200.024.902.343.750 | 0.39693 | 0.39693 | 0.39693 | 0.39693 | 0.058800    | -0.010800  | 20002 | 0.42924 | 0.42924 | 0.42924 | 0.42924 | 0.042300 | -0.00035100 |
| 200.028.105.468.750 | 0.41533 | 0.41533 | 0.41533 | 0.41533 | 0.055400    | -0.012300  | 20003 | 0.44287 | 0.44287 | 0.44287 | 0.44287 | 0.042600 | 0.00051300  |
| 200.031.308.593.750 | 0.43247 | 0.43247 | 0.43247 | 0.43247 | 0.050900    | -0.013900  | 20003 | 0.45656 | 0.45656 | 0.45656 | 0.45656 | 0.042700 | -9.84E-01   |
| 200.034.511.718.750 | 0.44793 | 0.44793 | 0.44793 | 0.44793 | 0.046500    | -0.019900  | 20003 | 0.47019 | 0.47019 | 0.47019 | 0.47019 | 0.042600 | -0.00048400 |
| 200.036.640.625.000 | 0.45728 | 0.45728 | 0.45728 | 0.45728 | 0.040300    | -0.022000  | 20004 | 0.47924 | 0.47924 | 0.47924 | 0.47924 | 0.042400 | -0.0013400  |
| 200.039.843.750.000 | 0.46942 | 0.46942 | 0.46942 | 0.46942 | 0.034800    | -0.018400  | 20004 | 0.49280 | 0.49280 | 0.49280 | 0.49280 | 0.041800 | -0.0020700  |
| 200.043.046.875.000 | 0.47961 | 0.47961 | 0.47961 | 0.47961 | 0.028500    | -0.019000  | 20004 | 0.50606 | 0.50606 | 0.50606 | 0.50606 | 0.041100 | -3.20E-01   |
| 200.046.250.000.000 | 0.48771 | 0.48771 | 0.48771 | 0.48771 | 0.022700    | -0.016100  | 20005 | 0.51914 | 0.51914 | 0.51914 | 0.51914 | 0.041800 | 0.0037100   |
| 200.049.453.125.000 | 0.49413 | 0.49413 | 0.49413 | 0.49413 | 0.018300    | -0.021100  | 20005 | 0.53282 | 0.53282 | 0.53282 | 0.53282 | 0.043500 | 0.0040600   |
| 200.051.601.562.500 | 0.49747 | 0.49747 | 0.49747 | 0.49747 | 0.011400    | -0.023700  | 20005 | 0.54240 | 0.54240 | 0.54240 | 0.54240 | 0.044000 | 0.00098400  |
| 200.054.804.687.500 | 0.50024 | 0.50024 | 0.50024 | 0.50024 | 0.0055900   | -0.017900  | 20005 | 0.55636 | 0.55636 | 0.55636 | 0.55636 | 0.044000 | 0.0018700   |
| 200.058.007.812.500 | 0.50105 | 0.50105 | 0.50105 | 0.50105 | -8.77E-01   | -0.016500  | 20006 | 0.57060 | 0.57060 | 0.57060 | 0.57060 | 0.045200 | 0.0029400   |
| 200.061.210.937.500 | 0.50018 | 0.50018 | 0.50018 | 0.50018 | -0.0049800  | -0.013100  | 20006 | 0.58533 | 0.58533 | 0.58533 | 0.58533 | 0.045900 | 0.0017400   |
| 200.064.414.062.500 | 0.49787 | 0.49787 | 0.49787 | 0.49787 | -0.0084800  | -0.012300  | 20006 | 0.59996 | 0.59996 | 0.59996 | 0.59996 | 0.046300 | 0.0050300   |
| 200.066.542.968.750 | 0.49566 | 0.49566 | 0.49566 | 0.49566 | -0.011500   | -0.0065300 | 20007 | 0.61001 | 0.61001 | 0.61001 | 0.61001 | 0.048600 | 0.0059700   |
| 200.069.746.093.750 | 0.49172 | 0.49172 | 0.49172 | 0.49172 | -0.012000   | 0.0012100  | 20007 | 0.62589 | 0.62589 | 0.62589 | 0.62589 | 0.049500 | 0.0030800   |
| 200.072.949.218.750 | 0.48799 | 0.48799 | 0.48799 | 0.48799 | -0.010700   | 0.0058500  | 20007 | 0.64173 | 0.64173 | 0.64173 | 0.64173 | 0.050500 | 0.0048800   |
| 200.076.152.343.750 | 0.48484 | 0.48484 | 0.48484 | 0.48484 | -0.0082200  | 0.0086100  | 20008 | 0.65824 | 0.65824 | 0.65824 | 0.65824 | 0.052600 | 0.0059500   |
| 200.079.355.468.750 | 0.48272 | 0.48272 | 0.48272 | 0.48272 | -0.0052200  | 0.014900   | 20008 | 0.67545 | 0.67545 | 0.67545 | 0.67545 | 0.054300 | 0.0056700   |
| 200.081.484.375.000 | 0.48206 | 0.48206 | 0.48206 | 0.48206 | -0.00026000 | 0.017500   | 20008 | 0.68720 | 0.68720 | 0.68720 | 0.68720 | 0.055600 | 0.0028800   |
| 200.084.687.500.000 | 0.48258 | 0.48258 | 0.48258 | 0.48258 | 0.0041300   | 0.014700   | 20008 | 0.70511 | 0.70511 | 0.70511 | 0.70511 | 0.055900 | 0.0030500   |
| 200.087.890.625.000 | 0.48471 | 0.48471 | 0.48471 | 0.48471 | 0.0091700   | 0.015500   | 20009 | 0.72303 | 0.72303 | 0.72303 | 0.72303 | 0.057600 | 0.0066700   |
| 200.091.093.750.000 | 0.48845 | 0.48845 | 0.48845 | 0.48845 | 0.014000    | 0.014500   | 20009 | 0.74197 | 0.74197 | 0.74197 | 0.74197 | 0.060100 | 0.0054500   |
| 200.094.296.875.000 | 0.49371 | 0.49371 | 0.49371 | 0.49371 | 0.018400    | 0.012400   | 20009 | 0.76158 | 0.76158 | 0.76158 | 0.76158 | 0.061100 | 0.0030400   |

|                     |         |           |         |           |          |            |       |         |         |         |         |            |             |
|---------------------|---------|-----------|---------|-----------|----------|------------|-------|---------|---------|---------|---------|------------|-------------|
| 200.097.500.000.000 | 0.50027 | 0.50027   | 0.50027 | 0.50027   | 0.022000 | 0.014000   | 20010 | 0.78112 | 0.78112 | 0.78112 | 0.78112 | 0.062100   | 0.0045400   |
| 200.099.648.437.500 | 0.50548 | 0.50548   | 0.50548 | 0.50548   | 0.025900 | 0.010100   | 20010 | 0.79480 | 0.79480 | 0.79480 | 0.79480 | 0.063500   | -0.00027100 |
| 200.102.851.562.500 | 0.51413 | -14.142   | 0.51415 | -14.142   | 0.027400 | 0.0052800  | 20010 | 0.81511 | 0.81511 | 0.81511 | 0.81511 | 0.062000   | -0.0036800  |
| 200.106.054.687.500 | 0.52301 | -12.191   | 0.52305 | -12.191   | 0.029300 | 0.0073600  | 20011 | 0.83445 | 0.83445 | 0.83445 | 0.83445 | 0.061200   | 0.00030500  |
| 200.109.257.812.500 | 0.53292 | -10.338   | 0.53297 | -10.337   | 0.032100 | 0.0065800  | 20011 | 0.85431 | 0.85431 | 0.85431 | 0.85431 | 0.062100   | 0.00099600  |
| 200.112.460.937.500 | 0.54360 | -0.85908  | 0.54367 | -0.85901  | 0.033500 | 0.0047400  | 20011 | 0.87429 | 0.87429 | 0.87429 | 0.87429 | 0.061800   | -0.0052700  |
| 200.114.589.843.750 | 0.55078 | -0.74822  | 0.55087 | -0.74813  | 0.034600 | 0.0043700  | 20011 | 0.88725 | 0.88725 | 0.88725 | 0.88725 | 0.059300   | -0.0077300  |
| 200.117.812.500.000 | 0.56213 | -0.58864  | 0.56223 | -0.58854  | 0.035900 | 0.0029200  | 20012 | 0.90604 | 0.90604 | 0.90604 | 0.90604 | 0.057700   | -0.0069300  |
| 200.121.015.625.000 | 0.57384 | -0.43891  | 0.57396 | -0.43879  | 0.036500 | 0.0014900  | 20012 | 0.92433 | 0.92433 | 0.92433 | 0.92433 | 0.054900   | -0.010600   |
| 200.124.218.750.000 | 0.58554 | -0.29867  | 0.58567 | -0.29853  | 0.036800 | 0.0016300  | 20012 | 0.94121 | 0.94121 | 0.94121 | 0.94121 | 0.050900   | -0.010200   |
| 200.127.421.875.000 | 0.59740 | -0.16715  | 0.59755 | -0.16699  | 0.037600 | 0.0023600  | 20013 | 0.95688 | 0.95688 | 0.95688 | 0.95688 | 0.048400   | -0.012900   |
| 200.129.550.781.250 | 0.60556 | -0.084300 | 0.60572 | -0.084100 | 0.038100 | 0.0013700  | 20013 | 0.96699 | 0.96699 | 0.96699 | 0.96699 | 0.044000   | -0.016800   |
| 200.132.753.906.250 | 0.61769 | 0.033300  | 0.61787 | 0.033500  | 0.038300 | 0.0021800  | 20013 | 0.98033 | 0.98033 | 0.98033 | 0.98033 | 0.039400   | -0.014200   |
| 200.135.957.031.250 | 0.63010 | 0.14329   | 0.63031 | 0.14349   | 0.039500 | 0.0043600  | 20014 | 0.99223 | 0.99223 | 0.99223 | 0.99223 | 0.034900   | -0.014300   |
| 200.139.179.687.500 | 0.64306 | 0.24583   | 0.64329 | 0.24605   | 0.041100 | 0.0043600  | 20014 | 10.027  | 10.027  | 10.027  | 10.027  | 0.030200   | -0.013700   |
| 200.142.382.812.500 | 0.65648 | 0.34030   | 0.65673 | 0.34054   | 0.042300 | 0.0024600  | 20014 | 10.116  | 10.116  | 10.116  | 10.116  | 0.026100   | -0.019200   |
| 200.144.511.718.750 | 0.66559 | 0.39922   | 0.66584 | 0.39947   | 0.042400 | 0.00057900 | 20014 | 10.166  | 10.166  | 10.166  | 10.166  | 0.020000   | -0.020600   |
| 200.147.714.843.750 | 0.67909 | 0.48198   | 0.67936 | 0.48225   | 0.042600 | 0.0016600  | 20015 | 10.223  | 10.223  | 10.223  | 10.223  | 0.015100   | -0.015000   |
| 200.150.917.968.750 | 0.69288 | 0.55831   | 0.69317 | 0.55860   | 0.043500 | 0.0019300  | 20015 | 10.263  | 10.263  | 10.263  | 10.263  | 0.010300   | -0.014700   |
| 200.154.140.625.000 | 0.70704 | 0.62843   | 0.70735 | 0.62874   | 0.043800 | 0.0013700  | 20015 | 10.289  | 10.289  | 10.289  | 10.289  | 0.0056200  | -0.013200   |
| 200.157.343.750.000 | 0.72101 | 0.69200   | 0.72133 | 0.69233   | 0.044400 | 0.0036500  | 20016 | 10.299  | 10.299  | 10.299  | 10.299  | 0.0018400  | -0.015500   |
| 200.159.472.656.250 | 0.73068 | 0.73108   | 0.73102 | 0.73142   | 0.045800 | 0.00049900 | 20016 | 10.299  | 10.299  | 10.299  | 10.299  | -0.0026500 | -0.014400   |
| 200.162.675.781.250 | 0.74544 | 0.78530   | 0.74580 | 0.78565   | 0.044600 | -0.0036100 | 20016 | 10.285  | 0.85250 | 10.286  | 0.85256 | -0.0058300 | -0.0098800  |
| 200.165.878.906.250 | 0.75929 | 0.83399   | 0.75966 | 0.83436   | 0.043400 | -0.0018100 | 20017 | 10.262  | 0.86265 | 10.263  | 0.86278 | -0.0089800 | -0.0094900  |
| 200.169.101.562.500 | 0.77333 | 0.87788   | 0.77372 | 0.87827   | 0.043500 | -0.0019100 | 20017 | 10.227  | 0.87249 | 10.230  | 0.87270 | -0.011900  | -0.0080200  |
| 200.172.304.687.500 | 0.78719 | 0.91670   | 0.78760 | 0.91711   | 0.042200 | -0.0032600 | 20017 | 10.185  | 0.88191 | 10.188  | 0.88219 | -0.014100  | -0.0057200  |
| 200.175.507.812.500 | 0.80039 | 0.95113   | 0.80082 | 0.95156   | 0.041400 | -0.0018500 | 20018 | 10.137  | 0.89102 | 10.140  | 0.89137 | -0.015600  | -0.0064400  |
| 200.177.636.718.750 | 0.80928 | 0.97162   | 0.80972 | 0.97206   | 0.041200 | -0.0028200 | 20018 | 10.102  | 0.89687 | 10.106  | 0.89727 | -0.017600  | -0.0052000  |
| 200.180.859.375.000 | 0.82245 | 0.99923   | 0.82290 | 0.99969   | 0.039900 | -0.0049000 | 20018 | 10.043  | 0.90543 | 10.048  | 0.90590 | -0.018400  | -0.0015200  |
| 200.184.062.500.000 | 0.83487 | 10.229    | 0.83534 | 10.234    | 0.038100 | -0.0049500 | 20018 | 0.99838 | 0.91360 | 0.99892 | 0.91415 | -0.018500  | -0.00016500 |
| 200.187.265.625.000 | 0.84686 | 10.432    | 0.84735 | 10.437    | 0.036700 | -0.0034300 | 20019 | 0.99240 | 0.92148 | 0.99302 | 0.92210 | -0.018500  | 0.00054800  |
| 200.190.468.750.000 | 0.85838 | 10.602    | 0.85889 | 10.607    | 0.035900 | -0.0035000 | 20019 | 0.98653 | 0.92901 | 0.98723 | 0.92970 | -0.018200  | 0.0023100   |
| 200.192.617.187.500 | 0.86605 | 10.700    | 0.86658 | 10.706    | 0.034800 | -0.0040900 | 20019 | 0.98267 | 0.93389 | 0.98341 | 0.93463 | -0.017200  | 0.0041700   |
| 200.195.820.312.500 | 0.87701 | 10.824    | 0.87755 | 10.829    | 0.033700 | -0.0026500 | 20020 | 0.97731 | 0.94090 | 0.97812 | 0.94171 | -0.016000  | 0.0045400   |
| 200.199.023.437.500 | 0.88761 | 10.923    | 0.88817 | 10.928    | 0.033100 | -0.0011400 | 20020 | 0.97246 | 0.94761 | 0.97334 | 0.94849 | -0.014300  | 0.0057100   |

|                     |         |        |         |        |           |             |       |         |         |         |         |            |             |
|---------------------|---------|--------|---------|--------|-----------|-------------|-------|---------|---------|---------|---------|------------|-------------|
| 200.202.226.562.500 | 0.89823 | 11.001 | 0.89882 | 11.007 | 0.033000  | -0.00069000 | 20020 | 0.96812 | 0.95404 | 0.96908 | 0.95499 | -0.012300  | 0.0063400   |
| 200.205.429.687.500 | 0.90874 | 11.060 | 0.90934 | 11.066 | 0.032700  | -0.0022800  | 20021 | 0.96457 | 0.96016 | 0.96560 | 0.96119 | -0.010300  | 0.0093000   |
| 200.207.578.125.000 | 0.91572 | 11.090 | 0.91633 | 11.096 | 0.031700  | -0.0037800  | 20021 | 0.96263 | 0.96411 | 0.96371 | 0.96519 | -0.0073300 | 0.010100    |
| 200.210.781.250.000 | 0.92572 | 11.124 | 0.92635 | 11.131 | 0.030700  | -0.0031900  | 20021 | 0.96065 | 0.96976 | 0.96181 | 0.97091 | -0.0048800 | 0.0076300   |
| 200.213.984.375.000 | 0.93534 | 11.147 | 0.93598 | 11.154 | 0.029700  | -0.0014500  | 20021 | 0.95950 | 0.97513 | 0.96073 | 0.97626 | -0.0024400 | 0.0075500   |
| 200.217.207.031.250 | 0.94482 | 11.162 | 0.94549 | 11.169 | 0.029700  | 0.0011100   | 20022 | 0.95908 | 0.98029 | 0.96038 | 0.98159 | -2,46E-01  | 0.0068600   |
| 200.220.410.156.250 | 0.95445 | 11.171 | 0.95513 | 11.178 | 0.030400  | 0.00086000  | 20022 | 0.95949 | 0.98514 | 0.96086 | 0.98651 | 0.0019700  | 0.0077700   |
| 200.222.539.062.500 | 0.96103 | 11.175 | 0.96173 | 11.182 | 0.030200  | -0.0019900  | 20022 | 0.96013 | 0.98822 | 0.96155 | 0.98964 | 0.0041100  | 0.0068800   |
| 200.225.761.718.750 | 0.97060 | 11.181 | 0.97131 | 11.188 | 0.029300  | -0.0017600  | 20023 | 0.96169 | 0.99267 | 0.96318 | 0.99417 | 0.0056500  | 0.0048500   |
| 200.228.964.843.750 | 0.97987 | 11.187 | 0.98060 | 11.194 | 0.029000  | -0.0019000  | 20023 | 0.96376 | 0.99686 | 0.96532 | 0.99842 | 0.0072300  | 0.0042900   |
| 200.232.167.968.750 | 0.98922 | 11.192 | 0.98997 | 11.199 | 0.028100  | -0.0028800  | 20023 | 0.96632 | 10.008  | 0.96796 | 10.025  | 0.0084000  | 0.0027400   |
| 200.235.390.625.000 | 0.99796 | 11.197 | 0.99873 | 11.204 | 0.027200  | -0.0023800  | 20024 | 0.96916 | 10.045  | 0.97087 | 10.063  | 0.0089900  | 0.0023000   |
| 200.237.519.531.250 | 10.038  | 11.200 | 10.045  | 11.207 | 0.026900  | -0.0026200  | 20024 | 0.97113 | 10.069  | 0.97289 | 10.087  | 0.0096300  | 0.0015700   |
| 200.240.722.656.250 | 10.123  | 11.204 | 10.131  | 11.212 | 0.025800  | -0.0035300  | 20024 | 0.97429 | 10.102  | 0.97612 | 10.121  | 0.0098300  | 0.00017900  |
| 200.243.945.312.500 | 10.204  | 11.208 | 10.212  | 11.216 | 0.024600  | -0.0032300  | 20024 | 0.97745 | 10.134  | 0.97936 | 10.153  | 0.0097500  | -0.00036900 |
| 200.247.148.437.500 | 10.281  | 11.211 | 10.289  | 11.219 | 0.023700  | -0.0030100  | 20025 | 0.98056 | 10.163  | 0.98254 | 10.183  | 0.0095900  | -0.00056000 |
| 200.250.351.562.500 | 10.355  | 11.214 | 10.364  | 11.223 | 0.022700  | -0.0056000  | 20025 | 0.98359 | 10.190  | 0.98564 | 10.211  | 0.0093900  | -0.0018600  |
| 200.252.500.000.000 | 10.402  | 11.216 | 10.411  | 11.225 | 0.020700  | -0.0063500  | 20025 | 0.98558 | 10.207  | 0.98768 | 10.228  | 0.0085900  | -0.0032000  |
| 200.255.703.125.000 | 10.466  | 11.219 | 10.475  | 11.227 | 0.019300  | -0.0044300  | 20026 | 0.98819 | 10.231  | 0.99036 | 10.253  | 0.0076700  | -0.0027200  |
| 200.258.906.250.000 | 10.526  | 11.221 | 10.535  | 11.230 | 0.017900  | -0.0043300  | 20026 | 0.99050 | 10.253  | 0.99274 | 10.276  | 0.0068500  | -0.0024800  |
| 200.262.128.906.250 | 10.581  | 11.223 | 10.590  | 11.232 | 0.016500  | -0.0036900  | 20026 | 0.99259 | 10.274  | 0.99491 | 10.297  | 0.0060800  | -0.0024600  |
| 200.265.332.031.250 | 10.632  | 11.224 | 10.641  | 11.234 | 0.015500  | -0.0048000  | 20027 | 0.99440 | 10.292  | 0.99679 | 10.316  | 0.0052700  | -0.0035300  |
| 200.267.480.468.750 | 10.664  | 11.225 | 10.674  | 11.235 | 0.013900  | -0.0058600  | 20027 | 0.99541 | 10.304  | 0.99785 | 10.328  | 0.0041800  | -0.0035300  |
| 200.270.683.593.750 | 10.706  | 11.226 | 10.716  | 11.236 | 0.012400  | -0.0051600  | 20027 | 0.99664 | 10.320  | 0.99915 | 10.345  | 0.0033800  | -0.0026400  |
| 200.273.886.718.750 | 10.744  | 11.227 | 10.754  | 11.237 | 0.010600  | -0.0052400  | 20027 | 0.99758 | 10.334  | 10.002  | 10.360  | 0.0024900  | -0.0026700  |
| 200.277.109.375.000 | 10.774  | 11.227 | 10.784  | 11.237 | 0.0090100 | -0.0040700  | 20028 | 0.99824 | 10.347  | 10.009  | 10.374  | 0.0016700  | -0.0022500  |
| 200.280.312.500.000 | 10.802  | 11.227 | 10.812  | 11.238 | 0.0080000 | -0.0029000  | 20028 | 0.99865 | 10.358  | 10.014  | 10.386  | 0.0010500  | -0.0014300  |
| 200.283.515.625.000 | 10.826  | 11.227 | 10.836  | 11.238 | 0.0071500 | -0.0037600  | 20028 | 0.99892 | 10.368  | 10.017  | 10.396  | 0.00075000 | -0.0012400  |
| 200.285.664.062.500 | 10.840  | 11.227 | 10.850  | 11.237 | 0.0059900 | -0.0036600  | 20029 | 0.99905 | 10.374  | 10.019  | 10.403  | 0.00039000 | -0.0012700  |
| 200.288.867.187.500 | 10.858  | 11.226 | 10.868  | 11.237 | 0.0051900 | -0.0024900  | 20029 | 0.99912 | 10.382  | 10.020  | 10.411  | 6,89E-01   | -0.00066500 |
| 200.292.089.843.750 | 10.873  | 11.225 | 10.884  | 11.236 | 0.0043800 | -0.0026000  | 20029 | 0.99909 | 10.389  | 10.021  | 10.419  | -3,74E-01  | 6,73E-01    |
| 200.295.292.968.750 | 10.886  | 11.224 | 10.897  | 11.235 | 0.0035200 | -0.0022700  | 20030 | 0.99910 | 10.394  | 10.022  | 10.425  | 0.00011200 | 0.00052300  |
| 200.298.496.093.750 | 10.896  | 11.222 | 10.907  | 11.234 | 0.0029300 | -0.0020800  | 20030 | 0.99917 | 10.399  | 10.023  | 10.430  | 0.00029800 | 0.0010000   |
| 200.300.644.531.250 | 10.901  | 11.221 | 10.913  | 11.232 | 0.0024100 | -0.0011800  | 20030 | 0.99926 | 10.401  | 10.024  | 10.433  | 0.00065000 | 0.0014000   |
| 200.303.847.656.250 | 10.909  | 11.219 | 10.920  | 11.231 | 0.0023000 | -0.00062600 | 20030 | 0.99951 | 10.404  | 10.028  | 10.437  | 0.0010400  | 0.0014600   |

|                     |        |        |        |        |           |             |       |         |        |        |        |             |             |
|---------------------|--------|--------|--------|--------|-----------|-------------|-------|---------|--------|--------|--------|-------------|-------------|
| 200.307.070.312.500 | 10.916 | 11.217 | 10.928 | 11.229 | 0.0020000 | -0.0010600  | 20031 | 0.99993 | 10.406 | 10.033 | 10.439 | 0.0015900   | 0.0019700   |
| 200.310.273.437.500 | 10.921 | 11.214 | 10.933 | 11.226 | 0.0016200 | -0.00092500 | 20031 | 10.005  | 10.407 | 10.039 | 10.441 | 0.0023100   | 0.0020100   |
| 200.313.496.093.750 | 10.927 | 11.211 | 10.939 | 11.224 | 0.0014100 | 9,96E-02    | 20031 | 10.014  | 10.407 | 10.049 | 10.442 | 0.0028800   | 0.0022200   |
| 200.315.625.000.000 | 10.929 | 11.209 | 10.941 | 11.222 | 0.0016200 | 0.00047400  | 20032 | 10.021  | 10.407 | 10.056 | 10.442 | 0.0035000   | 0.0023500   |
| 200.318.847.656.250 | 10.935 | 11.206 | 10.948 | 11.219 | 0.0016600 | -0.00016600 | 20032 | 10.033  | 10.406 | 10.069 | 10.442 | 0.0041400   | 0.0022000   |
| 200.322.050.781.250 | 10.940 | 11.203 | 10.952 | 11.215 | 0.0015200 | 0.00025400  | 20032 | 10.047  | 10.405 | 10.084 | 10.441 | 0.0049100   | 0.0022400   |
| 200.325.253.906.250 | 10.945 | 11.199 | 10.958 | 11.212 | 0.0018300 | 0.0010400   | 20033 | 10.064  | 10.403 | 10.102 | 10.440 | 0.0055700   | 0.0018800   |
| 200.328.476.562.500 | 10.951 | 11.195 | 10.964 | 11.208 | 0.0021800 | 0.0018100   | 20033 | 10.083  | 10.400 | 10.121 | 10.438 | 0.0061200   | 0.0026800   |
| 200.330.605.468.750 | 10.957 | 11.192 | 10.970 | 11.205 | 0.0028000 | 0.0014100   | 20033 | 10.097  | 10.398 | 10.136 | 10.437 | 0.0070100   | 0.0025200   |
| 200.333.828.125.000 | 10.966 | 11.188 | 10.980 | 11.201 | 0.0029400 | 0.00025600  | 20033 | 10.121  | 10.395 | 10.160 | 10.434 | 0.0074700   | 0.0014500   |
| 200.337.031.250.000 | 10.976 | 11.183 | 10.989 | 11.197 | 0.0029600 | 0.00084700  | 20034 | 10.145  | 10.391 | 10.185 | 10.431 | 0.0079400   | 0.0016500   |
| 200.340.253.906.250 | 10.985 | 11.178 | 10.999 | 11.192 | 0.0034800 | 0.0018700   | 20034 | 10.172  | 10.388 | 10.213 | 10.428 | 0.0085300   | 0.0014200   |
| 200.343.457.031.250 | 10.998 | 11.173 | 11.012 | 11.187 | 0.0041700 | 0.0023000   | 20034 | 10.200  | 10.384 | 10.242 | 10.425 | 0.0088500   | 0.00097100  |
| 200.345.605.468.750 | 11.008 | 11.170 | 11.022 | 11.184 | 0.0047100 | 0.0017800   | 20035 | 10.219  | 10.381 | 10.261 | 10.423 | 0.0090500   | 0.0012700   |
| 200.348.808.593.750 | 11.023 | 11.164 | 11.037 | 11.179 | 0.0051200 | 0.0011600   | 20035 | 10.248  | 10.377 | 10.291 | 10.420 | 0.0095300   | 0.0014200   |
| 200.352.031.250.000 | 11.041 | 11.159 | 11.055 | 11.173 | 0.0054600 | 0.00093900  | 20035 | 10.280  | 10.373 | 10.324 | 10.416 | 0.0099600   | 0.00091100  |
| 200.355.234.375.000 | 11.058 | 11.153 | 11.073 | 11.167 | 0.0057200 | 0.0011100   | 20036 | 10.312  | 10.369 | 10.357 | 10.413 | 0.010100    | 0.00028100  |
| 200.358.457.031.250 | 11.077 | 11.147 | 11.092 | 11.162 | 0.0061700 | 0.0013100   | 20036 | 10.345  | 10.365 | 10.390 | 10.410 | 0.010100    | 0.00011000  |
| 200.362.734.375.000 | 11.104 | 11.139 | 11.119 | 11.154 | 0.0067100 | 0.0012900   | 20036 | 10.388  | 10.359 | 10.434 | 10.405 | 0.010200    | 0.00044800  |
| 200.365.957.031.250 | 11.128 | 11.132 | 11.143 | 11.147 | 0.0071400 | 0.0010400   | 20037 | 10.422  | 10.355 | 10.469 | 10.402 | 0.010500    | 0.00063900  |
| 200.370.234.375.000 | 11.158 | 11.123 | 11.173 | 11.139 | 0.0074900 | 0.00089400  | 20037 | 10.467  | 10.350 | 10.515 | 10.398 | 0.010700    | 0.00046900  |
| 200.374.511.718.750 | 11.192 | 11.114 | 11.207 | 11.130 | 0.0079100 | 0.00054400  | 20037 | 10.513  | 10.345 | 10.562 | 10.393 | 0.010900    | 0.00035400  |
| 200.378.808.593.750 | 11.226 | 11.104 | 11.242 | 11.120 | 0.0079500 | 4,00E-01    | 20038 | 10.560  | 10.340 | 10.610 | 10.389 | 0.011000    | 0.00014500  |
| 200.383.085.937.500 | 11.260 | 11.095 | 11.276 | 11.111 | 0.0079400 | -2,72E-01   | 20038 | 10.607  | 10.335 | 10.658 | 10.385 | 0.011000    | 1,57E-01    |
| 200.386.308.593.750 | 11.285 | 11.087 | 11.302 | 11.103 | 0.0079300 | -0.00055400 | 20039 | 10.643  | 10.331 | 10.694 | 10.382 | 0.011000    | -3,19E-01   |
| 200.390.585.937.500 | 11.319 | 11.077 | 11.336 | 11.093 | 0.0075300 | -0.00078500 | 20039 | 10.690  | 10.326 | 10.742 | 10.378 | 0.011000    | 7,41E-02    |
| 200.395.937.500.000 | 11.358 | 11.063 | 11.375 | 11.080 | 0.0071800 | -0.00073900 | 20040 | 10.749  | 10.320 | 10.802 | 10.373 | 0.011000    | -0.00021100 |
| 200.400.234.375.000 | 11.389 | 11.052 | 11.406 | 11.069 | 0.0068100 | -0.0010800  | 20040 | 10.796  | 10.315 | 10.850 | 10.369 | 0.010800    | -0.0010400  |
| 200.404.511.718.750 | 11.416 | 11.041 | 11.434 | 11.058 | 0.0062500 | -0.0011100  | 20040 | 10.841  | 10.310 | 10.896 | 10.366 | 0.010100    | -0.0017000  |
| 200.408.789.062.500 | 11.442 | 11.030 | 11.460 | 11.047 | 0.0058600 | -0.0013200  | 20041 | 10.883  | 10.306 | 10.939 | 10.362 | 0.0093200   | -0.0022400  |
| 200.413.085.937.500 | 11.467 | 11.018 | 11.484 | 11.036 | 0.0051100 | -0.0013900  | 20041 | 10.921  | 10.301 | 10.978 | 10.358 | 0.0081900   | -0.0026200  |
| 200.418.437.500.000 | 11.491 | 11.003 | 11.509 | 11.021 | 0.0045100 | -0.0010200  | 20042 | 10.962  | 10.295 | 11.020 | 10.354 | 0.0067900   | -0.0037200  |
| 200.422.734.375.000 | 11.510 | 10.991 | 11.528 | 11.009 | 0.0041300 | -0.00097100 | 20042 | 10.987  | 10.291 | 11.046 | 10.350 | 0.0046100   | -0.0042700  |
| 200.428.085.937.500 | 11.531 | 10.976 | 11.550 | 10.994 | 0.0035800 | -0.0015800  | 20043 | 11.006  | 10.285 | 11.067 | 10.346 | 0.0026700   | -0.0049300  |
| 200.432.363.281.250 | 11.545 | 10.963 | 11.563 | 10.982 | 0.0026000 | -0.0017800  | 20043 | 11.012  | 10.281 | 11.074 | 10.343 | -0.00014200 | -0.0057600  |

|                     |        |        |        |        |            |             |       |         |        |         |        |             |             |
|---------------------|--------|--------|--------|--------|------------|-------------|-------|---------|--------|---------|--------|-------------|-------------|
| 200.437.734.375.000 | 11.556 | 10.947 | 11.576 | 10.966 | 0.0018600  | -0.0011100  | 20044 | 11.005  | 10.275 | 11.068  | 10.338 | -0.0028800  | -0.0050000  |
| 200.443.085.937.500 | 11.565 | 10.931 | 11.584 | 10.950 | 0.0014200  | -0.0010600  | 20044 | 10.981  | 10.270 | 11.046  | 10.334 | -0.0055100  | -0.0057400  |
| 200.447.382.812.500 | 11.570 | 10.918 | 11.590 | 10.937 | 0.00084200 | -0.0014800  | 20045 | 10.952  | 10.266 | 11.017  | 10.331 | -0.0084200  | -0.0055400  |
| 200.452.734.375.000 | 11.573 | 10.901 | 11.593 | 10.921 | -6,34E-02  | -0.0018900  | 20045 | 10.900  | 10.261 | 10.967  | 10.327 | -0.010800   | -0.0046700  |
| 200.458.085.937.500 | 11.570 | 10.884 | 11.590 | 10.905 | -0.0011800 | -0.0020400  | 20046 | 10.835  | 10.256 | 10.903  | 10.323 | -0.013400   | -0.0041900  |
| 200.463.457.031.250 | 11.560 | 10.868 | 11.581 | 10.888 | -0.0021900 | -0.0017500  | 20046 | 10.756  | 10.251 | 10.825  | 10.319 | -0.015300   | -0.0026600  |
| 200.468.808.593.750 | 11.547 | 10.850 | 11.567 | 10.871 | -0.0030600 | -0.0018800  | 20047 | 10.671  | 10.246 | 10.741  | 10.316 | -0.016300   | -0.0015900  |
| 200.474.179.687.500 | 11.527 | 10.833 | 11.548 | 10.854 | -0.0042000 | -0.0022500  | 20047 | 10.582  | 10.241 | 10.653  | 10.312 | -0.017100   | -0.0011200  |
| 200.479.531.250.000 | 11.502 | 10.816 | 11.523 | 10.837 | -0.0054800 | -0.0020200  | 20048 | 10.488  | 10.236 | 10.560  | 10.308 | -0.017500   | 0.0001100   |
| 200.485.976.562.500 | 11.463 | 10.795 | 11.484 | 10.817 | -0.0065800 | -0.0019500  | 20049 | 10.376  | 10.231 | 10.449  | 10.304 | -0.016900   | 0.0013200   |
| 200.491.328.125.000 | 11.424 | 10.777 | 11.446 | 10.800 | -0.0077800 | -0.0021200  | 20049 | 10.288  | 10.226 | 10.363  | 10.301 | -0.015900   | 0.0020200   |
| 200.496.699.218.750 | 11.379 | 10.760 | 11.402 | 10.782 | -0.0088600 | -0.0015400  | 20050 | 10.205  | 10.222 | 10.281  | 10.298 | -0.014800   | 0.0021600   |
| 200.503.125.000.000 | 11.319 | 10.739 | 11.342 | 10.762 | -0.0096000 | -0.0011800  | 20050 | 10.114  | 10.216 | 10.192  | 10.294 | -0.013400   | 0.0027800   |
| 200.508.496.093.750 | 11.266 | 10.721 | 11.289 | 10.744 | -0.010200  | -0.00081400 | 20051 | 10.047  | 10.212 | 10.126  | 10.291 | -0.011500   | 0.0030300   |
| 200.514.921.875.000 | 11.199 | 10.700 | 11.222 | 10.724 | -0.010600  | -0.00048000 | 20051 | 0.99789 | 10.207 | 10.059  | 10.287 | -0.0097900  | 0.0031000   |
| 200.520.292.968.750 | 11.141 | 10.683 | 11.165 | 10.706 | -0.010800  | -0.00024100 | 20052 | 0.99318 | 10.203 | 10.013  | 10.284 | -0.0078200  | 0.0030700   |
| 200.526.718.750.000 | 11.071 | 10.662 | 11.095 | 10.686 | -0.010800  | 0.00010300  | 20053 | 0.98866 | 10.198 | 0.99694 | 10.280 | -0.0061700  | 0.0025400   |
| 200.533.164.062.500 | 11.002 | 10.641 | 11.026 | 10.665 | -0.010700  | 0.00043000  | 20053 | 0.98524 | 10.193 | 0.99367 | 10.277 | -0.0045500  | 0.0028600   |
| 200.538.515.625.000 | 10.945 | 10.624 | 10.970 | 10.649 | -0.010300  | 0.00071700  | 20054 | 0.98330 | 10.189 | 0.99184 | 10.274 | -0.0028000  | 0.0027400   |
| 200.544.960.937.500 | 10.880 | 10.603 | 10.905 | 10.628 | -0.0098400 | 0.00085500  | 20054 | 0.98194 | 10.184 | 0.99063 | 10.271 | -0.0013100  | 0.0023200   |
| 200.551.386.718.750 | 10.818 | 10.583 | 10.844 | 10.609 | -0.0092300 | 0.0011300   | 20055 | 0.98161 | 10.180 | 0.99044 | 10.268 | 0.00019000  | 0.0021700   |
| 200.557.832.031.250 | 10.761 | 10.563 | 10.787 | 10.589 | -0.0083800 | 0.0012500   | 20056 | 0.98219 | 10.175 | 0.99116 | 10.265 | 0.0014800   | 0.0019400   |
| 200.564.277.343.750 | 10.710 | 10.544 | 10.736 | 10.570 | -0.0076200 | 0.0011600   | 20056 | 0.98352 | 10.171 | 0.99264 | 10.262 | 0.0026900   | 0.0016700   |
| 200.570.703.125.000 | 10.663 | 10.524 | 10.689 | 10.551 | -0.0068800 | 0.0011000   | 20057 | 0.98564 | 10.166 | 0.99491 | 10.259 | 0.0036400   | 0.0012800   |
| 200.577.148.437.500 | 10.622 | 10.505 | 10.649 | 10.532 | -0.0062100 | 0.00079700  | 20058 | 0.98820 | 10.162 | 0.99761 | 10.256 | 0.0043300   | 0.00088500  |
| 200.584.667.968.750 | 10.576 | 10.484 | 10.604 | 10.511 | -0.0057700 | 0.00068800  | 20058 | 0.99170 | 10.157 | 10.013  | 10.253 | 0.0048700   | 0.00051500  |
| 200.591.093.750.000 | 10.541 | 10.466 | 10.569 | 10.493 | -0.0052500 | 0.00084000  | 20059 | 0.99500 | 10.153 | 10.047  | 10.250 | 0.0050500   | -8,61E-01   |
| 200.597.539.062.500 | 10.509 | 10.448 | 10.537 | 10.476 | -0.0046900 | 0.00072000  | 20060 | 0.99820 | 10.149 | 10.081  | 10.248 | 0.0047600   | -0.00049700 |
| 200.605.058.593.750 | 10.476 | 10.428 | 10.504 | 10.457 | -0.0042400 | 0.00060900  | 20061 | 10.017  | 10.145 | 10.117  | 10.245 | 0.0043600   | -0.00080700 |
| 200.611.503.906.250 | 10.450 | 10.412 | 10.478 | 10.440 | -0.0038400 | 0.00052300  | 20061 | 10.043  | 10.141 | 10.145  | 10.243 | 0.0036400   | -0.0011300  |
| 200.619.023.437.500 | 10.422 | 10.393 | 10.451 | 10.422 | -0.0035100 | 0.00050700  | 20062 | 10.067  | 10.137 | 10.171  | 10.240 | 0.0027700   | -0.0014100  |
| 200.625.449.218.750 | 10.401 | 10.377 | 10.430 | 10.407 | -0.0031300 | 0.00056800  | 20063 | 10.082  | 10.133 | 10.186  | 10.238 | 0.0016700   | -0.0015400  |
| 200.632.968.750.000 | 10.379 | 10.360 | 10.409 | 10.390 | -0.0027200 | 0.00067700  | 20063 | 10.091  | 10.129 | 10.197  | 10.235 | 0.00062000  | -0.0014300  |
| 200.640.488.281.250 | 10.360 | 10.343 | 10.390 | 10.373 | -0.0021100 | 0.00058000  | 20064 | 10.091  | 10.125 | 10.199  | 10.233 | -0.00047400 | -0.0012700  |
| 200.648.007.812.500 | 10.347 | 10.327 | 10.378 | 10.358 | -0.0018400 | -1,56E-01   | 20065 | 10.083  | 10.121 | 10.193  | 10.231 | -0.0012900  | -0.0011000  |



|                     |         |        |         |        |             |             |       |         |        |         |        |             |             |
|---------------------|---------|--------|---------|--------|-------------|-------------|-------|---------|--------|---------|--------|-------------|-------------|
| 200.654.453.125.000 | 10.334  | 10.313 | 10.365  | 10.345 | -0.0021300  | -0.00029500 | 20065 | 10.073  | 10.118 | 10.184  | 10.229 | -0.0020000  | -0.00088400 |
| 200.661.972.656.250 | 10.317  | 10.298 | 10.349  | 10.330 | -0.0022600  | -5.23E-01   | 20066 | 10.055  | 10.114 | 10.168  | 10.227 | -0.0025300  | -0.00063400 |
| 200.669.492.187.500 | 10.300  | 10.284 | 10.332  | 10.316 | -0.0022100  | 0.00012100  | 20067 | 10.035  | 10.110 | 10.149  | 10.225 | -0.0029600  | -0.00050600 |
| 200.677.011.718.750 | 10.284  | 10.270 | 10.316  | 10.302 | -0.0020800  | -5.56E-01   | 20068 | 10.011  | 10.106 | 10.127  | 10.223 | -0.0032900  | -0.00028000 |
| 200.685.605.468.750 | 10.267  | 10.254 | 10.299  | 10.287 | -0.0023000  | -0.00037800 | 20069 | 0.99818 | 10.102 | 10.100  | 10.221 | -0.0034100  | -9.33E-01   |
| 200.693.125.000.000 | 10.247  | 10.241 | 10.280  | 10.275 | -0.0026800  | -0.00042700 | 20069 | 0.99561 | 10.099 | 10.076  | 10.219 | -0.0034400  | 2.80E-01    |
| 200.700.644.531.250 | 10.226  | 10.229 | 10.260  | 10.263 | -0.0029400  | -0.00038100 | 20070 | 0.99301 | 10.095 | 10.052  | 10.217 | -0.0033700  | 0.00023400  |
| 200.708.164.062.500 | 10.202  | 10.217 | 10.237  | 10.252 | -0.0032600  | -0.00034500 | 20071 | 0.99055 | 10.092 | 10.029  | 10.215 | -0.0030900  | 0.00038700  |
| 200.716.777.343.750 | 10.174  | 10.205 | 10.208  | 10.239 | -0.0035000  | -0.00031200 | 20072 | 0.98803 | 10.088 | 10.006  | 10.214 | -0.0027400  | 0.00059700  |
| 200.724.296.875.000 | 10.146  | 10.194 | 10.181  | 10.229 | -0.0037600  | -0.00025200 | 20072 | 0.98612 | 10.085 | 0.99881 | 10.212 | -0.0021200  | 0.00087900  |
| 200.732.890.625.000 | 10.113  | 10.183 | 10.149  | 10.218 | -0.0039100  | -0.00018400 | 20073 | 0.98461 | 10.082 | 0.99749 | 10.210 | -0.0013300  | 0.0011600   |
| 200.740.410.156.250 | 10.083  | 10.173 | 10.119  | 10.209 | -0.0040600  | -0.00016400 | 20074 | 0.98399 | 10.079 | 0.99703 | 10.209 | -0.00025700 | 0.0013400   |
| 200.749.023.437.500 | 10.048  | 10.163 | 10.084  | 10.199 | -0.0041700  | -4.80E-02   | 20075 | 0.98419 | 10.075 | 0.99743 | 10.207 | 0.00083100  | 0.0015200   |
| 200.756.542.968.750 | 10.016  | 10.154 | 10.053  | 10.191 | -0.0040700  | 0.00023000  | 20076 | 0.98533 | 10.072 | 0.99873 | 10.206 | 0.0021900   | 0.0016700   |
| 200.765.136.718.750 | 0.99821 | 10.145 | 10.019  | 10.182 | -0.0038000  | 0.00032000  | 20077 | 0.98773 | 10.069 | 10.013  | 10.205 | 0.0035300   | 0.0016300   |
| 200.773.750.000.000 | 0.99503 | 10.136 | 0.99881 | 10.174 | -0.0035100  | 0.00029500  | 20077 | 0.99139 | 10.066 | 10.052  | 10.203 | 0.0050000   | 0.0016100   |
| 200.782.343.750.000 | 0.99216 | 10.128 | 0.99599 | 10.167 | -0.0032900  | 0.00034900  | 20078 | 0.99633 | 10.062 | 10.103  | 10.202 | 0.0063000   | 0.0013300   |
| 200.790.957.031.250 | 0.98937 | 10.121 | 0.99324 | 10.160 | -0.0029100  | 0.00037100  | 20079 | 10.022  | 10.059 | 10.164  | 10.201 | 0.0072900   | 0.00097700  |
| 200.799.550.781.250 | 0.98715 | 10.114 | 0.99107 | 10.153 | -0.0026500  | 0.00029100  | 20080 | 10.089  | 10.056 | 10.232  | 10.200 | 0.0079800   | 0.00050200  |
| 200.808.164.062.500 | 0.98481 | 10.108 | 0.98877 | 10.147 | -0.0024100  | 0.00038700  | 20081 | 10.160  | 10.053 | 10.305  | 10.198 | 0.0081600   | -3.93E-01   |
| 200.816.777.343.750 | 0.98299 | 10.102 | 0.98700 | 10.142 | -0.0019900  | 0.00035500  | 20082 | 10.229  | 10.050 | 10.377  | 10.197 | 0.0079100   | -0.00052500 |
| 200.825.371.093.750 | 0.98139 | 10.096 | 0.98545 | 10.137 | -0.0018000  | 0.00017300  | 20083 | 10.296  | 10.047 | 10.445  | 10.196 | 0.0072500   | -0.0011300  |
| 200.833.984.375.000 | 0.97989 | 10.091 | 0.98400 | 10.133 | -0.0016900  | 0.00018000  | 20083 | 10.354  | 10.044 | 10.505  | 10.195 | 0.0059700   | -0.0015200  |
| 200.843.671.875.000 | 0.97830 | 10.087 | 0.98246 | 10.128 | -0.0014700  | 0.00016400  | 20084 | 10.405  | 10.041 | 10.558  | 10.194 | 0.0044800   | -0.0018900  |
| 200.852.285.156.250 | 0.97719 | 10.083 | 0.98140 | 10.125 | -0.0013900  | 1.89E-01    | 20085 | 10.436  | 10.038 | 10.591  | 10.193 | 0.0025100   | -0.0021500  |
| 200.861.972.656.250 | 0.97576 | 10.079 | 0.98003 | 10.121 | -0.0014400  | -8.14E-02   | 20086 | 10.451  | 10.034 | 10.608  | 10.192 | 0.00054300  | -0.0023400  |
| 200.870.566.406.250 | 0.97456 | 10.076 | 0.97887 | 10.119 | -0.0014000  | 7.30E-01    | 20087 | 10.446  | 10.031 | 10.605  | 10.191 | -0.0017700  | -0.0023800  |
| 200.880.253.906.250 | 0.97320 | 10.073 | 0.97756 | 10.117 | -0.0013100  | 0.00011800  | 20088 | 10.419  | 10.028 | 10.580  | 10.190 | -0.0038200  | -0.0022400  |
| 200.888.867.187.500 | 0.97217 | 10.071 | 0.97658 | 10.115 | -0.0011900  | 2.34E-01    | 20089 | 10.376  | 10.025 | 10.539  | 10.189 | -0.0058700  | -0.0019600  |
| 200.898.574.218.750 | 0.97103 | 10.069 | 0.97549 | 10.114 | -0.0012600  | 4.02E-01    | 20090 | 10.311  | 10.022 | 10.477  | 10.187 | -0.0074100  | -0.0013700  |
| 200.908.261.718.750 | 0.96972 | 10.068 | 0.97424 | 10.113 | -0.0011100  | 0.00025100  | 20091 | 10.232  | 10.019 | 10.400  | 10.186 | -0.0085300  | -0.00083600 |
| 200.917.949.218.750 | 0.96888 | 10.067 | 0.97345 | 10.112 | -0.00077600 | 0.00029400  | 20092 | 10.146  | 10.015 | 10.316  | 10.185 | -0.0090300  | -0.00018700 |
| 200.926.562.500.000 | 0.96830 | 10.066 | 0.97292 | 10.112 | -0.00057000 | 0.00035200  | 20093 | 10.067  | 10.013 | 10.239  | 10.184 | -0.0088800  | 0.00051600  |
| 200.936.250.000.000 | 0.96784 | 10.066 | 0.97251 | 10.113 | -0.00013200 | 0.00046400  | 20094 | 0.99834 | 10.009 | 10.157  | 10.183 | -0.0080900  | 0.0010500   |
| 200.945.957.031.250 | 0.96804 | 10.066 | 0.97277 | 10.113 | 0.00033000  | 0.00036100  | 20095 | 0.99104 | 10.006 | 10.086  | 10.182 | -0.0068300  | 0.0013200   |

|                     |         |        |         |        |            |             |       |         |         |         |        |             |             |
|---------------------|---------|--------|---------|--------|------------|-------------|-------|---------|---------|---------|--------|-------------|-------------|
| 200.956.718.750.000 | 0.96851 | 10.067 | 0.97330 | 10.115 | 0.00060600 | 0.00027900  | 20096 | 0.98435 | 10.002  | 10.022  | 10.180 | -0.0053800  | 0.0015500   |
| 200.966.425.781.250 | 0.96928 | 10.068 | 0.97412 | 10.116 | 0.00090100 | 0.00033400  | 20097 | 0.98003 | 0.99986 | 0.99807 | 10.179 | -0.0036500  | 0.0016800   |
| 200.976.113.281.250 | 0.97026 | 10.069 | 0.97515 | 10.118 | 0.0012500  | 0.00042500  | 20098 | 0.97727 | 0.99951 | 0.99553 | 10.178 | -0.0021100  | 0.0015000   |
| 200.985.820.312.500 | 0.97171 | 10.070 | 0.97666 | 10.120 | 0.0017200  | 0.00043300  | 20099 | 0.97593 | 0.99917 | 0.99440 | 10.176 | -0.00073500 | 0.0013100   |
| 200.995.507.812.500 | 0.97360 | 10.072 | 0.97860 | 10.122 | 0.0020900  | 0.00029700  | 20100 | 0.97585 | 0.99882 | 0.99453 | 10.175 | 0.00043300  | 0.00093000  |
| 201.006.289.062.500 | 0.97600 | 10.075 | 0.98105 | 10.125 | 0.0023300  | 0.00028600  | 20101 | 0.97681 | 0.99842 | 0.99573 | 10.173 | 0.0011700   | 0.00057500  |
| 201.015.996.093.750 | 0.97838 | 10.077 | 0.98349 | 10.128 | 0.0026800  | 0.00029500  | 20102 | 0.97824 | 0.99807 | 0.99737 | 10.172 | 0.0016100   | 0.00027100  |
| 201.026.777.343.750 | 0.98149 | 10.080 | 0.98666 | 10.132 | 0.0029400  | 0.00017100  | 20103 | 0.98012 | 0.99767 | 0.99948 | 10.170 | 0.0017200   | -1,97E-02   |
| 201.036.484.375.000 | 0.98439 | 10.083 | 0.98961 | 10.135 | 0.0030300  | 4,80E-01    | 20104 | 0.98177 | 0.99731 | 10.014  | 10.169 | 0.0016100   | -0.00018900 |
| 201.047.265.625.000 | 0.98770 | 10.086 | 0.99298 | 10.139 | 0.0030300  | 2,07E-01    | 20105 | 0.98341 | 0.99691 | 10.032  | 10.167 | 0.0013400   | -0.00026000 |
| 201.058.046.875.000 | 0.99094 | 10.089 | 0.99627 | 10.143 | 0.0030700  | 6,06E-01    | 20106 | 0.98465 | 0.99650 | 10.047  | 10.166 | 0.0010500   | -0.00026100 |
| 201.067.753.906.250 | 0.99399 | 10.093 | 0.99939 | 10.147 | 0.0031600  | 0.00011500  | 20107 | 0.98555 | 0.99613 | 10.058  | 10.164 | 0.00080300  | -0.00020700 |
| 201.078.535.156.250 | 0.99741 | 10.096 | 10.029  | 10.151 | 0.0033100  | 0.00013800  | 20108 | 0.98630 | 0.99572 | 10.068  | 10.162 | 0.00062400  | -0.00012600 |
| 201.089.335.937.500 | 10.011  | 10.100 | 10.066  | 10.155 | 0.0034600  | 0.00011500  | 20109 | 0.98690 | 0.99531 | 10.076  | 10.160 | 0.00053200  | -6,25E-01   |
| 201.100.117.187.500 | 10.049  | 10.104 | 10.104  | 10.160 | 0.0035600  | 7,98E-01    | 20110 | 0.98745 | 0.99489 | 10.084  | 10.159 | 0.00048900  | -2,05E-01   |
| 201.110.898.437.500 | 10.088  | 10.108 | 10.144  | 10.164 | 0.0036300  | 6,23E-01    | 20111 | 0.98795 | 0.99447 | 10.092  | 10.157 | 0.00048700  | 4,60E-01    |
| 201.121.699.218.750 | 10.127  | 10.112 | 10.184  | 10.169 | 0.0036900  | 1,97E-02    | 20112 | 0.98850 | 0.99405 | 10.099  | 10.155 | 0.00058800  | 0.00014600  |
| 201.132.480.468.750 | 10.168  | 10.116 | 10.225  | 10.174 | 0.0036300  | -8,21E-01   | 20113 | 0.98922 | 0.99363 | 10.109  | 10.153 | 0.00080200  | 0.00022900  |
| 201.144.355.468.750 | 10.209  | 10.121 | 10.267  | 10.179 | 0.0035100  | -6,91E-01   | 20114 | 0.99032 | 0.99316 | 10.123  | 10.151 | 0.0011100   | 0.00032400  |
| 201.155.156.250.000 | 10.247  | 10.124 | 10.306  | 10.183 | 0.0034800  | -8,20E-01   | 20116 | 0.99173 | 0.99274 | 10.139  | 10.149 | 0.0015400   | 0.00042800  |
| 201.165.957.031.250 | 10.284  | 10.128 | 10.344  | 10.187 | 0.0033300  | -0.00018900 | 20117 | 0.99364 | 0.99231 | 10.160  | 10.147 | 0.0020300   | 0.00049500  |
| 201.176.738.281.250 | 10.319  | 10.132 | 10.379  | 10.192 | 0.0030700  | -0.00021500 | 20118 | 0.99612 | 0.99188 | 10.188  | 10.145 | 0.0026100   | 0.00047800  |
| 201.188.632.812.500 | 10.354  | 10.136 | 10.414  | 10.196 | 0.0028400  | -0.00020500 | 20119 | 0.99954 | 0.99140 | 10.225  | 10.143 | 0.0031200   | 0.00039000  |
| 201.199.433.593.750 | 10.384  | 10.139 | 10.445  | 10.200 | 0.0026000  | -0.00020100 | 20120 | 10.032  | 0.99097 | 10.263  | 10.141 | 0.0034900   | 0.00022100  |
| 201.211.308.593.750 | 10.413  | 10.142 | 10.475  | 10.204 | 0.0023800  | -0.00020200 | 20121 | 10.075  | 0.99049 | 10.309  | 10.139 | 0.0036200   | 3,79E-01    |
| 201.223.183.593.750 | 10.440  | 10.145 | 10.503  | 10.208 | 0.0021200  | -0.00019300 | 20122 | 10.118  | 0.99000 | 10.354  | 10.137 | 0.0035800   | -0.00016400 |
| 201.233.984.375.000 | 10.461  | 10.148 | 10.524  | 10.211 | 0.0019500  | -0.00014000 | 20123 | 10.156  | 0.98957 | 10.395  | 10.135 | 0.0032400   | -0.00042100 |
| 201.245.878.906.250 | 10.484  | 10.150 | 10.548  | 10.214 | 0.0018100  | -0.00011900 | 20125 | 10.191  | 0.98908 | 10.433  | 10.132 | 0.0026300   | -0.00063000 |
| 201.257.753.906.250 | 10.504  | 10.153 | 10.568  | 10.217 | 0.0016600  | -0.00015800 | 20126 | 10.218  | 0.98859 | 10.462  | 10.130 | 0.0017500   | -0.00082400 |
| 201.269.648.437.500 | 10.524  | 10.154 | 10.589  | 10.219 | 0.0014300  | -0.00025800 | 20127 | 10.233  | 0.98810 | 10.480  | 10.128 | 0.00066600  | -0.00093500 |
| 201.281.542.968.750 | 10.538  | 10.156 | 10.604  | 10.222 | 0.0010500  | -0.00027200 | 20128 | 10.234  | 0.98761 | 10.483  | 10.125 | -0.00047700 | -0.00097000 |
| 201.293.437.500.000 | 10.549  | 10.158 | 10.615  | 10.224 | 0.00078200 | -0.00019700 | 20129 | 10.222  | 0.98712 | 10.473  | 10.123 | -0.0016400  | -0.00091400 |
| 201.305.312.500.000 | 10.557  | 10.159 | 10.623  | 10.226 | 0.00058100 | -0.00021900 | 20131 | 10.195  | 0.98663 | 10.450  | 10.121 | -0.0026500  | -0.00074400 |
| 201.317.207.031.250 | 10.563  | 10.160 | 10.630  | 10.227 | 0.00026100 | -0.00027800 | 20132 | 10.159  | 0.98614 | 10.416  | 10.118 | -0.0034100  | -0.00053800 |
| 201.329.101.562.500 | 10.563  | 10.160 | 10.631  | 10.228 | -7,96E-01  | -0.00024800 | 20133 | 10.114  | 0.98564 | 10.374  | 10.116 | -0.0039300  | -0.00036000 |

|                     |         |        |         |        |             |             |       |         |         |         |        |             |             |
|---------------------|---------|--------|---------|--------|-------------|-------------|-------|---------|---------|---------|--------|-------------|-------------|
| 201.340.996.093.750 | 10.561  | 10.161 | 10.630  | 10.229 | -0.00032900 | -0.00023000 | 20134 | 10.065  | 0.98515 | 10.327  | 10.114 | -0.0042600  | -0.00025900 |
| 201.353.984.375.000 | 10.555  | 10.161 | 10.624  | 10.230 | -0.00065300 | -0.00023700 | 20135 | 10.008  | 0.98461 | 10.273  | 10.111 | -0.0045700  | -0.00023500 |
| 201.365.878.906.250 | 10.545  | 10.161 | 10.615  | 10.231 | -0.00091900 | -0.00020800 | 20137 | 0.99514 | 0.98411 | 10.219  | 10.109 | -0.0048500  | -0.00021600 |
| 201.378.867.187.500 | 10.532  | 10.160 | 10.603  | 10.231 | -0.0011700  | -0.00019600 | 20138 | 0.98872 | 0.98357 | 10.158  | 10.106 | -0.0051100  | -0.00017900 |
| 201.390.761.718.750 | 10.515  | 10.160 | 10.587  | 10.231 | -0.0014100  | -0.00015200 | 20139 | 0.98242 | 0.98307 | 10.097  | 10.104 | -0.0052900  | -4,71E-01   |
| 201.403.750.000.000 | 10.497  | 10.159 | 10.569  | 10.231 | -0.0015500  | -7,44E-01   | 20140 | 0.97555 | 0.98252 | 10.031  | 10.101 | -0.0052300  | 0.00016200  |
| 201.415.664.062.500 | 10.477  | 10.158 | 10.550  | 10.231 | -0.0015900  | -5,19E-01   | 20142 | 0.96941 | 0.98203 | 0.99724 | 10.099 | -0.0048900  | 0.00039500  |
| 201.428.652.343.750 | 10.457  | 10.157 | 10.531  | 10.230 | -0.0016800  | -9,44E-01   | 20143 | 0.96337 | 0.98148 | 0.99148 | 10.096 | -0.0042400  | 0.00057000  |
| 201.441.640.625.000 | 10.433  | 10.155 | 10.508  | 10.229 | -0.0018400  | -7,82E-01   | 20144 | 0.95838 | 0.98094 | 0.98677 | 10.093 | -0.0034100  | 0.00063200  |
| 201.454.628.906.250 | 10.409  | 10.153 | 10.484  | 10.228 | -0.0018800  | -2,77E-01   | 20145 | 0.95451 | 0.98039 | 0.98318 | 10.091 | -0.0026000  | 0.00063700  |
| 201.466.542.968.750 | 10.387  | 10.152 | 10.462  | 10.227 | -0.0019100  | -3,02E-01   | 20147 | 0.95191 | 0.97989 | 0.98083 | 10.088 | -0.0018200  | 0.00054900  |
| 201.479.531.250.000 | 10.362  | 10.149 | 10.438  | 10.226 | -0.0019600  | -6,56E-01   | 20148 | 0.94997 | 0.97935 | 0.97918 | 10.086 | -0.0012300  | 0.00037100  |
| 201.492.539.062.500 | 10.336  | 10.147 | 10.413  | 10.224 | -0.0020800  | -9,47E-01   | 20149 | 0.94870 | 0.97880 | 0.97818 | 10.083 | -0.00086000 | 0.00021500  |
| 201.505.527.343.750 | 10.308  | 10.144 | 10.385  | 10.222 | -0.0022000  | -9,56E-01   | 20151 | 0.94774 | 0.97826 | 0.97750 | 10.080 | -0.00067500 | 0.00011000  |
| 201.518.535.156.250 | 10.279  | 10.142 | 10.357  | 10.220 | -0.0023300  | -0.00010300 | 20152 | 0.94694 | 0.97772 | 0.97699 | 10.078 | -0.00057300 | 8,41E-01    |
| 201.532.617.187.500 | 10.245  | 10.138 | 10.324  | 10.217 | -0.0024800  | -8,28E-01   | 20153 | 0.94619 | 0.97713 | 0.97653 | 10.075 | -0.00044700 | 0.00014200  |
| 201.545.625.000.000 | 10.211  | 10.135 | 10.291  | 10.215 | -0.0025500  | -3,81E-01   | 20155 | 0.94573 | 0.97659 | 0.97636 | 10.072 | -0.00018900 | 0.00027800  |
| 201.558.632.812.500 | 10.178  | 10.132 | 10.259  | 10.212 | -0.0025800  | -3,52E-01   | 20156 | 0.94569 | 0.97605 | 0.97660 | 10.070 | 0.00027500  | 0.00039200  |
| 201.572.714.843.750 | 10.142  | 10.128 | 10.223  | 10.209 | -0.0026500  | -1,34E-01   | 20157 | 0.94647 | 0.97547 | 0.97768 | 10.067 | 0.00087400  | 0.00045600  |
| 201.585.722.656.250 | 10.107  | 10.124 | 10.189  | 10.206 | -0.0026100  | 4,51E-01    | 20159 | 0.94806 | 0.97493 | 0.97955 | 10.064 | 0.0015100   | 0.00041100  |
| 201.599.824.218.750 | 10.071  | 10.120 | 10.153  | 10.203 | -0.0025200  | 8,03E-01    | 20160 | 0.95057 | 0.97435 | 0.98236 | 10.061 | 0.0019900   | 0.00028600  |
| 201.612.832.031.250 | 10.038  | 10.116 | 10.122  | 10.199 | -0.0024000  | 9,97E-01    | 20161 | 0.95345 | 0.97382 | 0.98552 | 10.059 | 0.0022900   | 0.00010900  |
| 201.626.933.593.750 | 10.006  | 10.112 | 10.090  | 10.196 | -0.0022500  | 0.00013300  | 20163 | 0.95676 | 0.97324 | 0.98913 | 10.056 | 0.0022800   | -6,29E-01   |
| 201.639.960.937.500 | 0.99772 | 10.107 | 10.062  | 10.192 | -0.0020400  | 0.00017700  | 20164 | 0.95964 | 0.97271 | 0.99229 | 10.054 | 0.0021100   | -0.00015300 |
| 201.654.062.500.000 | 0.99504 | 10.103 | 10.036  | 10.188 | -0.0017700  | 0.00018500  | 20165 | 0.96250 | 0.97214 | 0.99545 | 10.051 | 0.0018700   | -0.00019900 |
| 201.668.164.062.500 | 0.99272 | 10.098 | 10.013  | 10.184 | -0.0015100  | 0.00012600  | 20167 | 0.96490 | 0.97157 | 0.99815 | 10.048 | 0.0015500   | -0.00021900 |
| 201.682.265.625.000 | 0.99077 | 10.093 | 0.99947 | 10.180 | -0.0014200  | 7,41E-01    | 20168 | 0.96688 | 0.97100 | 10.004  | 10.046 | 0.0012500   | -0.00022700 |
| 201.696.386.718.750 | 0.98872 | 10.088 | 0.99749 | 10.175 | -0.0013000  | 0.00010200  | 20170 | 0.96842 | 0.97044 | 10.023  | 10.043 | 0.00091200  | -0.00028700 |
| 201.710.488.281.250 | 0.98710 | 10.082 | 0.99594 | 10.171 | -0.0011300  | 7,88E-01    | 20171 | 0.96945 | 0.96988 | 10.036  | 10.040 | 0.00043700  | -0.00034200 |
| 201.724.609.375.000 | 0.98553 | 10.077 | 0.99445 | 10.166 | -0.0010800  | 6,19E-01    | 20172 | 0.96966 | 0.96932 | 10.041  | 10.038 | -5,33E-01   | -0.00029700 |
| 201.738.710.937.500 | 0.98404 | 10.072 | 0.99304 | 10.162 | -0.00095600 | 9,79E-01    | 20174 | 0.96930 | 0.96877 | 10.041  | 10.035 | -0.00040100 | -0.00015800 |
| 201.752.832.031.250 | 0.98283 | 10.066 | 0.99190 | 10.157 | -0.00080500 | 0.00010900  | 20175 | 0.96852 | 0.96822 | 10.036  | 10.033 | -0.00050000 | 9,34E-01    |
| 201.766.953.125.000 | 0.98177 | 10.061 | 0.99092 | 10.152 | -0.00064700 | 0.00010600  | 20177 | 0.96789 | 0.96767 | 10.032  | 10.030 | -0.00013800 | 0.00036800  |
| 201.782.167.968.750 | 0.98093 | 10.055 | 0.99016 | 10.147 | -0.00049500 | 0.00010900  | 20178 | 0.96812 | 0.96709 | 10.038  | 10.028 | 0.00058100  | 0.00062200  |
| 201.796.289.062.500 | 0.98032 | 10.049 | 0.98962 | 10.142 | -0.00032600 | 0.00012200  | 20180 | 0.96959 | 0.96655 | 10.056  | 10.025 | 0.0016900   | 0.00086900  |

|                     |         |         |         |         |             |            |       |         |         |         |         |            |             |
|---------------------|---------|---------|---------|---------|-------------|------------|-------|---------|---------|---------|---------|------------|-------------|
| 201.810.410.156.250 | 0.98001 | 10.043  | 0.98939 | 10.137  | -0.00015000 | 0.00010800 | 20181 | 0.97289 | 0.96601 | 10.092  | 10.023  | 0.0030400  | 0.00086900  |
| 201.825.625.000.000 | 0.97988 | 10.037  | 0.98933 | 10.132  | -8,88E-02   | 9,54E-01   | 20183 | 0.97850 | 0.96544 | 10.151  | 10.020  | 0.0042400  | 0.00072400  |
| 201.839.746.093.750 | 0.97999 | 10.031  | 0.98951 | 10.127  | 0.00013000  | 7,46E-01   | 20184 | 0.98532 | 0.96492 | 10.222  | 10.018  | 0.0051600  | 0.00044800  |
| 201.854.980.468.750 | 0.98026 | 10.025  | 0.98987 | 10.121  | 0.00021000  | 5,61E-01   | 20185 | 0.99365 | 0.96436 | 10.309  | 10.016  | 0.0055500  | 7,96E-01    |
| 201.870.195.312.500 | 0.98062 | 10.019  | 0.99031 | 10.116  | 0.00030100  | 6,98E-01   | 20187 | 10.022  | 0.96380 | 10.398  | 10.014  | 0.0054000  | -0.00032100 |
| 201.884.335.937.500 | 0.98114 | 10.013  | 0.99091 | 10.111  | 0.00041500  | 5,92E-01   | 20188 | 10.095  | 0.96329 | 10.474  | 10.011  | 0.0046100  | -0.00065500 |
| 201.899.550.781.250 | 0.98184 | 10.007  | 0.99169 | 10.106  | 0.00047400  | 2,87E-02   | 20190 | 10.158  | 0.96275 | 10.539  | 10.009  | 0.0034800  | -0.00082800 |
| 201.914.785.156.250 | 0.98259 | 10.001  | 0.99251 | 10.100  | 0.00042400  | -2,75E-01  | 20191 | 10.201  | 0.96222 | 10.586  | 10.007  | 0.0020900  | -0.00097100 |
| 201.930.019.531.250 | 0.98313 | 0.99949 | 0.99314 | 10.095  | 0.00039100  | -7,51E-02  | 20193 | 10.221  | 0.96168 | 10.609  | 10.005  | 0.00052200 | -0.0010300  |
| 201.945.253.906.250 | 0.98378 | 0.99888 | 0.99386 | 10.090  | 0.00040100  | 1,03E-01   | 20195 | 10.217  | 0.96116 | 10.608  | 10.003  | -0.0010500 | -0.0010500  |
| 201.960.488.281.250 | 0.98435 | 0.99829 | 0.99452 | 10.084  | 0.00042200  | 1,67E-01   | 20196 | 10.189  | 0.96064 | 10.584  | 10.001  | -0.0026700 | -0.0010400  |
| 201.975.722.656.250 | 0.98506 | 0.99770 | 0.99531 | 10.079  | 0.00045200  | 7,41E-02   | 20198 | 10.136  | 0.96013 | 10.534  | 0.99990 | -0.0042200 | -0.00096600 |
| 201.990.957.031.250 | 0.98573 | 0.99712 | 0.99605 | 10.074  | 0.00044500  | -2,51E-01  | 20199 | 10.061  | 0.95962 | 10.462  | 0.99972 | -0.0056100 | -0.00086300 |
| 202.006.191.406.250 | 0.98642 | 0.99655 | 0.99682 | 10.069  | 0.00037500  | -3,92E-01  | 20201 | 0.99649 | 0.95912 | 10.369  | 0.99954 | -0.0068400 | -0.00071200 |
| 202.021.445.312.500 | 0.98688 | 0.99599 | 0.99736 | 10.065  | 0.00032500  | 2,31E-02   | 20202 | 0.98522 | 0.95863 | 10.260  | 0.99936 | -0.0077800 | -0.00046900 |
| 202.037.773.437.500 | 0.98744 | 0.99540 | 0.99801 | 10.060  | 0.00038200  | 1,91E-01   | 20204 | 0.97192 | 0.95810 | 10.130  | 0.99918 | -0.0083200 | -0.00023200 |
| 202.053.027.343.750 | 0.98808 | 0.99487 | 0.99873 | 10.055  | 0.00038500  | -1,99E-01  | 20205 | 0.95893 | 0.95762 | 10.003  | 0.99902 | -0.0085100 | 6,00E-03    |
| 202.069.375.000.000 | 0.98866 | 0.99431 | 0.99940 | 10.050  | 0.00031900  | -3,22E-01  | 20207 | 0.94501 | 0.95710 | 0.98676 | 0.99885 | -0.0083200 | 0.00025700  |
| 202.084.628.906.250 | 0.98909 | 0.99381 | 0.99990 | 10.046  | 0.00028400  | -3,10E-01  | 20208 | 0.93263 | 0.95663 | 0.97469 | 0.99870 | -0.0077000 | 0.00050800  |
| 202.100.976.562.500 | 0.98956 | 0.99330 | 10.005  | 10.042  | 0.00022200  | -4,30E-01  | 20210 | 0.92069 | 0.95613 | 0.96309 | 0.99854 | -0.0067200 | 0.00074200  |
| 202.116.230.468.750 | 0.98979 | 0.99283 | 10.008  | 10.038  | 0.00014800  | -3,54E-01  | 20212 | 0.91140 | 0.95567 | 0.95412 | 0.99840 | -0.0053500 | 0.00096300  |
| 202.132.578.125.000 | 0.99003 | 0.99235 | 10.011  | 10.034  | 0.00011000  | -2,51E-01  | 20213 | 0.90377 | 0.95518 | 0.94684 | 0.99825 | -0.0036800 | 0.0011200   |
| 202.148.925.781.250 | 0.99015 | 0.99188 | 10.013  | 10.030  | 6,55E-01    | -8,81E-02  | 20215 | 0.89937 | 0.95470 | 0.94278 | 0.99811 | -0.0017000 | 0.0011600   |
| 202.165.292.968.750 | 0.99024 | 0.99144 | 10.015  | 10.027  | 8,10E-01    | 1,65E-01   | 20217 | 0.89821 | 0.95422 | 0.94197 | 0.99797 | 0.00012500 | 0.0010600   |
| 202.180.546.875.000 | 0.99041 | 0.99103 | 10.017  | 10.023  | 0.00011800  | 1,67E-01   | 20218 | 0.89977 | 0.95378 | 0.94384 | 0.99785 | 0.0016600  | 0.00076800  |
| 202.196.914.062.500 | 0.99061 | 0.99062 | 10.020  | 10.020  | 0.00013400  | -4,94E-02  | 20220 | 0.90347 | 0.95331 | 0.94788 | 0.99772 | 0.0025500  | 0.00035700  |
| 202.213.281.250.000 | 0.99085 | 0.99022 | 10.023  | 10.017  | 0.00010200  | -2,71E-01  | 20221 | 0.90812 | 0.95285 | 0.95288 | 0.99760 | 0.0028300  | -8,62E-02   |
| 202.229.648.437.500 | 0.99094 | 0.98984 | 10.025  | 10.014  | 4,48E-01    | -2,18E-01  | 20223 | 0.91274 | 0.95239 | 0.95784 | 0.99749 | 0.0025200  | -0.00027400 |
| 202.247.109.375.000 | 0.99100 | 0.98945 | 10.027  | 10.011  | 2,80E-01    | 9,49E-02   | 20225 | 0.91666 | 0.95191 | 0.96212 | 0.99737 | 0.0019000  | -0.00038800 |
| 202.263.476.562.500 | 0.99104 | 0.98910 | 10.028  | 10.008  | 7,70E-01    | 4,73E-02   | 20226 | 0.91918 | 0.95147 | 0.96498 | 0.99727 | 0.0012100  | -0.00036700 |
| 202.279.863.281.250 | 0.99125 | 0.98876 | 10.031  | 10.006  | 4,35E-01    | -4,04E-01  | 20228 | 0.92063 | 0.95103 | 0.96677 | 0.99717 | 0.00070200 | -0.00022000 |
| 202.296.230.468.750 | 0.99118 | 0.98844 | 10.031  | 10.004  | -5,54E-01   | -2,87E-01  | 20230 | 0.92148 | 0.95059 | 0.96796 | 0.99707 | 0.00049000 | -2,91E-01   |
| 202.313.710.937.500 | 0.99106 | 0.98812 | 10.031  | 10.001  | -5,36E-01   | 7,92E-02   | 20231 | 0.92229 | 0.95013 | 0.96913 | 0.99698 | 0.00060300 | 0.00014300  |
| 202.330.097.656.250 | 0.99100 | 0.98783 | 10.031  | 0.99991 | -2,86E-01   | -1,89E-02  | 20233 | 0.92352 | 0.94971 | 0.97070 | 0.99689 | 0.00097500 | 0.00026100  |
| 202.346.484.375.000 | 0.99097 | 0.98755 | 10.031  | 0.99972 | -5,98E-01   | -1,18E-01  | 20235 | 0.92548 | 0.94929 | 0.97301 | 0.99681 | 0.0014600  | 0.00029000  |

|                     |         |         |        |         |             |           |       |         |         |         |         |             |             |
|---------------------|---------|---------|--------|---------|-------------|-----------|-------|---------|---------|---------|---------|-------------|-------------|
| 202.363.964.843.750 | 0.99080 | 0.98727 | 10.031 | 0.99953 | -6,87E-01   | 3,89E-02  | 20236 | 0.92846 | 0.94885 | 0.97634 | 0.99673 | 0.0019600   | 0.00027400  |
| 202.381.445.312.500 | 0.99073 | 0.98701 | 10.031 | 0.99935 | -4,62E-01   | -2,61E-02 | 20238 | 0.93232 | 0.94841 | 0.98057 | 0.99666 | 0.0024200   | 0.00025800  |
| 202.397.832.031.250 | 0.99064 | 0.98677 | 10.031 | 0.99920 | -7,75E-01   | -1,51E-01 | 20240 | 0.93665 | 0.94800 | 0.98523 | 0.99659 | 0.0028300   | 0.00021200  |
| 202.415.332.031.250 | 0.99047 | 0.98654 | 10.030 | 0.99906 | -9,74E-01   | -3,89E-02 | 20242 | 0.94191 | 0.94758 | 0.99085 | 0.99652 | 0.0031400   | 0.00015000  |
| 202.432.812.500.000 | 0.99030 | 0.98631 | 10.029 | 0.99892 | -9,11E-01   | 5,61E-02  | 20243 | 0.94763 | 0.94715 | 0.99694 | 0.99646 | 0.0033500   | 7,20E-01    |
| 202.450.312.500.000 | 0.99015 | 0.98610 | 10.028 | 0.99880 | -7,78E-01   | -1,10E-01 | 20245 | 0.95363 | 0.94674 | 10.033  | 0.99640 | 0.0033900   | -4,45E-01   |
| 202.466.718.750.000 | 0.99004 | 0.98592 | 10.028 | 0.99870 | -0.00012800 | -1,86E-01 | 20247 | 0.95913 | 0.94635 | 10.091  | 0.99636 | 0.0032000   | -0.00016400 |
| 202.484.218.750.000 | 0.98971 | 0.98573 | 10.026 | 0.99861 | -0.00014100 | 5,53E-02  | 20248 | 0.96448 | 0.94594 | 10.149  | 0.99631 | 0.0028300   | -0.00026300 |
| 202.501.738.281.250 | 0.98954 | 0.98556 | 10.025 | 0.99852 | -0.00010900 | 1,61E-01  | 20250 | 0.96905 | 0.94553 | 10.198  | 0.99626 | 0.0022800   | -0.00032400 |
| 202.520.332.031.250 | 0.98932 | 0.98539 | 10.024 | 0.99845 | -8,29E-01   | 3,12E-01  | 20252 | 0.97271 | 0.94511 | 10.238  | 0.99622 | 0.0016600   | -0.00034100 |
| 202.537.851.562.500 | 0.98924 | 0.98524 | 10.024 | 0.99839 | 3,73E-02    | 1,74E-01  | 20254 | 0.97505 | 0.94471 | 10.265  | 0.99618 | 0.0010500   | -0.00032400 |
| 202.555.371.093.750 | 0.98933 | 0.98510 | 10.026 | 0.99834 | -2,20E-01   | -4,01E-02 | 20256 | 0.97638 | 0.94432 | 10.282  | 0.99615 | 0.00053000  | -0.00025600 |
| 202.572.871.093.750 | 0.98917 | 0.98497 | 10.025 | 0.99830 | -1,03E-01   | 3,02E-01  | 20257 | 0.97691 | 0.94393 | 10.291  | 0.99612 | 0.00015100  | -0.00016100 |
| 202.590.410.156.250 | 0.98930 | 0.98486 | 10.027 | 0.99827 | 8,39E-01    | 4,34E-01  | 20259 | 0.97691 | 0.94355 | 10.295  | 0.99610 | -3,50E-01   | -4,78E-01   |
| 202.609.023.437.500 | 0.98947 | 0.98474 | 10.030 | 0.99825 | 0.00014700  | 1,76E-01  | 20261 | 0.97678 | 0.94315 | 10.297  | 0.99608 | -2,20E-01   | 3,41E-01    |
| 202.626.542.968.750 | 0.98982 | 0.98464 | 10.034 | 0.99824 | 0.00014700  | 1,12E-01  | 20263 | 0.97683 | 0.94277 | 10.301  | 0.99606 | 8,83E-01    | 2,67E-01    |
| 202.645.175.781.250 | 0.99000 | 0.98455 | 10.037 | 0.99824 | 0.00018700  | 2,20E-01  | 20265 | 0.97710 | 0.94238 | 10.308  | 0.99605 | 7,46E-01    | -7,73E-01   |
| 202.662.714.843.750 | 0.99050 | 0.98447 | 10.043 | 0.99825 | 0.00022700  | -6,70E-02 | 20266 | 0.97710 | 0.94201 | 10.311  | 0.99604 | -0.00019100 | -0.00018900 |
| 202.681.347.656.250 | 0.99082 | 0.98440 | 10.047 | 0.99827 | 0.00016300  | -1,83E-01 | 20268 | 0.97641 | 0.94162 | 10.308  | 0.99603 | -0.00060900 | -0.00024600 |
| 202.699.980.468.750 | 0.99111 | 0.98433 | 10.051 | 0.99830 | 0.00015900  | 1,74E-01  | 20270 | 0.97483 | 0.94124 | 10.296  | 0.99603 | -0.0011100  | -0.00026700 |
| 202.717.519.531.250 | 0.99140 | 0.98427 | 10.055 | 0.99833 | 0.00022600  | 3,02E-01  | 20272 | 0.97240 | 0.94088 | 10.275  | 0.99603 | -0.0015700  | -0.00022200 |
| 202.736.171.875.000 | 0.99192 | 0.98422 | 10.061 | 0.99838 | 0.00026800  | 4,81E-02  | 20274 | 0.96914 | 0.94050 | 10.247  | 0.99603 | -0.0019100  | -0.00017100 |
| 202.754.804.687.500 | 0.99240 | 0.98418 | 10.066 | 0.99842 | 0.00024400  | 6,06E-02  | 20275 | 0.96528 | 0.94013 | 10.212  | 0.99603 | -0.0022100  | -0.00016900 |
| 202.773.457.031.250 | 0.99283 | 0.98414 | 10.072 | 0.99848 | 0.00029100  | 7,02E-02  | 20277 | 0.96090 | 0.93976 | 10.172  | 0.99604 | -0.0025400  | -0.00021400 |
| 202.792.109.375.000 | 0.99348 | 0.98411 | 10.079 | 0.99854 | 0.00027000  | -2,07E-01 | 20279 | 0.95580 | 0.93939 | 10.125  | 0.99605 | -0.0030100  | -0.00025900 |
| 202.810.781.250.000 | 0.99384 | 0.98408 | 10.084 | 0.99861 | 0.00021300  | -3,38E-01 | 20281 | 0.94968 | 0.93902 | 10.067  | 0.99607 | -0.0035100  | -0.00021500 |
| 202.829.433.593.750 | 0.99428 | 0.98406 | 10.089 | 0.99869 | 0.00014400  | -3,15E-01 | 20283 | 0.94272 | 0.93866 | 10.001  | 0.99609 | -0.0038100  | -8,58E-01   |
| 202.848.105.468.750 | 0.99438 | 0.98405 | 10.091 | 0.99876 | 9,54E-01    | -2,08E-01 | 20285 | 0.93545 | 0.93830 | 0.99326 | 0.99610 | -0.0038300  | 8,39E-01    |
| 202.866.757.812.500 | 0.99463 | 0.98404 | 10.094 | 0.99885 | 6,60E-01    | -3,92E-01 | 20287 | 0.92843 | 0.93795 | 0.98661 | 0.99613 | -0.0035000  | 0.00021800  |
| 202.886.542.968.750 | 0.99463 | 0.98403 | 10.095 | 0.99894 | -5,52E-01   | -5,25E-01 | 20289 | 0.92201 | 0.93757 | 0.98059 | 0.99615 | -0.0029900  | 0.00025500  |
| 202.905.214.843.750 | 0.99442 | 0.98403 | 10.094 | 0.99903 | -0.00013600 | -4,17E-01 | 20291 | 0.91695 | 0.93722 | 0.97591 | 0.99618 | -0.0025200  | 0.00021200  |
| 202.923.886.718.750 | 0.99412 | 0.98402 | 10.092 | 0.99912 | -0.00021100 | -4,18E-01 | 20292 | 0.91261 | 0.93687 | 0.97194 | 0.99620 | -0.0021900  | 0.00013000  |
| 202.943.671.875.000 | 0.99361 | 0.98403 | 10.088 | 0.99922 | -0.00029600 | -2,22E-01 | 20294 | 0.90851 | 0.93650 | 0.96824 | 0.99623 | -0.0020200  | 7,65E-01    |
| 202.962.363.281.250 | 0.99298 | 0.98403 | 10.083 | 0.99932 | -0.00029700 | -1,70E-01 | 20296 | 0.90484 | 0.93615 | 0.96495 | 0.99627 | -0.0019000  | 8,08E-01    |
| 202.982.148.437.500 | 0.99247 | 0.98403 | 10.079 | 0.99942 | -0.00036200 | -3,50E-01 | 20298 | 0.90120 | 0.93579 | 0.96171 | 0.99630 | -0.0017100  | 0.00014600  |

|                     |         |         |         |         |             |           |       |         |         |         |         |             |             |
|---------------------|---------|---------|---------|---------|-------------|-----------|-------|---------|---------|---------|---------|-------------|-------------|
| 203.000.839.843.750 | 0.99159 | 0.98404 | 10.071  | 0.99952 | -0.00043100 | -7,62E-02 | 20300 | 0.89826 | 0.93545 | 0.95915 | 0.99633 | -0.0013400  | 0.00025100  |
| 203.020.625.000.000 | 0.99081 | 0.98405 | 10.064  | 0.99963 | -0.00039100 | 5,53E-02  | 20302 | 0.89606 | 0.93509 | 0.95734 | 0.99637 | -0.00074400 | 0.00036100  |
| 203.040.429.687.500 | 0.99004 | 0.98405 | 10.057  | 0.99973 | -0.00040900 | -5,66E-02 | 20304 | 0.89532 | 0.93473 | 0.95700 | 0.99641 | 9,16E-01    | 0.00045200  |
| 203.060.234.375.000 | 0.98919 | 0.98406 | 10.050  | 0.99983 | -0.00041400 | -8,52E-02 | 20306 | 0.89642 | 0.93437 | 0.95850 | 0.99645 | 0.0010500   | 0.00046400  |
| 203.078.945.312.500 | 0.98845 | 0.98406 | 10.043  | 0.99993 | -0.00044200 | -2,40E-01 | 20308 | 0.89934 | 0.93403 | 0.96180 | 0.99649 | 0.0018800   | 0.00033700  |
| 203.098.750.000.000 | 0.98748 | 0.98406 | 10.035  | 10.000  | -0.00050600 | -2,25E-01 | 20310 | 0.90366 | 0.93368 | 0.96652 | 0.99653 | 0.0023500   | 0.00015800  |
| 203.118.574.218.750 | 0.98644 | 0.98406 | 10.025  | 10.001  | -0.00053100 | -1,30E-01 | 20312 | 0.90864 | 0.93332 | 0.97188 | 0.99657 | 0.0025100   | 2,69E-01    |
| 203.138.378.906.250 | 0.98538 | 0.98406 | 10.015  | 10.002  | -0.00055800 | -2,23E-02 | 20314 | 0.91360 | 0.93297 | 0.97724 | 0.99661 | 0.0024500   | -4,01E-01   |
| 203.158.203.125.000 | 0.98424 | 0.98405 | 10.005  | 10.003  | -0.00054000 | 1,12E-01  | 20316 | 0.91835 | 0.93261 | 0.98239 | 0.99665 | 0.0023500   | -4,26E-01   |
| 203.179.140.625.000 | 0.98318 | 0.98404 | 0.99954 | 10.004  | -0.00051200 | 4,21E-02  | 20318 | 0.92317 | 0.93224 | 0.98763 | 0.99670 | 0.0022800   | -3,20E-01   |
| 203.198.964.843.750 | 0.98215 | 0.98402 | 0.99861 | 10.005  | -0.00052300 | 7,77E-02  | 20320 | 0.92764 | 0.93189 | 0.99249 | 0.99674 | 0.0022200   | -4,13E-01   |
| 203.218.808.593.750 | 0.98110 | 0.98399 | 0.99767 | 10.006  | -0.00048100 | 2,44E-01  | 20322 | 0.93196 | 0.93153 | 0.99721 | 0.99678 | 0.0021100   | -6,56E-01   |
| 203.238.652.343.750 | 0.98024 | 0.98397 | 0.99690 | 10.006  | -0.00042600 | 1,60E-01  | 20324 | 0.93603 | 0.93118 | 10.017  | 0.99682 | 0.0019600   | -9,13E-01   |
| 203.259.589.843.750 | 0.97937 | 0.98393 | 0.99613 | 10.007  | -0.00041600 | 1,32E-01  | 20326 | 0.93994 | 0.93081 | 10.060  | 0.99687 | 0.0017400   | -0.00011700 |
| 203.279.433.593.750 | 0.97854 | 0.98390 | 0.99540 | 10.008  | -0.00037200 | 2,98E-01  | 20328 | 0.94313 | 0.93045 | 10.096  | 0.99691 | 0.0014800   | -0.00012500 |
| 203.300.390.625.000 | 0.97785 | 0.98385 | 0.99481 | 10.008  | -0.00029400 | 2,66E-01  | 20330 | 0.94598 | 0.93008 | 10.129  | 0.99695 | 0.0012300   | -0.00012500 |
| 203.320.253.906.250 | 0.97734 | 0.98380 | 0.99440 | 10.009  | -0.00026400 | 1,64E-01  | 20332 | 0.94817 | 0.92972 | 10.154  | 0.99699 | 0.00096900  | -0.00012800 |
| 203.341.210.937.500 | 0.97677 | 0.98375 | 0.99393 | 10.009  | -0.00022700 | 9,90E-02  | 20334 | 0.94994 | 0.92935 | 10.176  | 0.99703 | 0.00070800  | -0.00012500 |
| 203.362.167.968.750 | 0.97639 | 0.98369 | 0.99365 | 10.010  | -0.00022200 | -6,47E-02 | 20336 | 0.95113 | 0.92897 | 10.192  | 0.99707 | 0.00044700  | -0.00012600 |
| 203.382.050.781.250 | 0.97586 | 0.98363 | 0.99322 | 10.010  | -0.00025400 | 8,53E-02  | 20338 | 0.95176 | 0.92862 | 10.203  | 0.99711 | 0.00019200  | -0.00012600 |
| 203.403.027.343.750 | 0.97535 | 0.98356 | 0.99281 | 10.010  | -0.00018800 | 2,61E-01  | 20340 | 0.95192 | 0.92825 | 10.208  | 0.99715 | -6,93E-01   | -0.00013700 |
| 203.424.003.906.250 | 0.97507 | 0.98349 | 0.99264 | 10.011  | -0.00014400 | 5,27E-02  | 20342 | 0.95147 | 0.92787 | 10.208  | 0.99719 | -0.00038300 | -0.00015300 |
| 203.444.980.468.750 | 0.97474 | 0.98341 | 0.99241 | 10.011  | -0.00016500 | 1,64E-02  | 20344 | 0.95031 | 0.92750 | 10.200  | 0.99723 | -0.00071200 | -0.00015000 |
| 203.465.976.562.500 | 0.97438 | 0.98333 | 0.99215 | 10.011  | -0.00013700 | 1,43E-01  | 20347 | 0.94848 | 0.92712 | 10.186  | 0.99727 | -0.0010100  | -0.00012100 |
| 203.486.972.656.250 | 0.97417 | 0.98325 | 0.99204 | 10.011  | -0.00010600 | 1,64E-01  | 20349 | 0.94605 | 0.92674 | 10.166  | 0.99730 | -0.0012200  | -6,72E-01   |
| 203.507.968.750.000 | 0.97394 | 0.98316 | 0.99191 | 10.011  | -6,86E-01   | 3,07E-01  | 20351 | 0.94336 | 0.92637 | 10.143  | 0.99734 | -0.0013000  | 4,71E-02    |
| 203.528.964.843.750 | 0.97388 | 0.98306 | 0.99196 | 10.011  | 2,34E-01    | 3,23E-01  | 20353 | 0.94061 | 0.92599 | 10.120  | 0.99738 | -0.0012000  | 8,60E-01    |
| 203.549.960.937.500 | 0.97403 | 0.98297 | 0.99222 | 10.011  | 6,72E-01    | 1,66E-01  | 20355 | 0.93832 | 0.92562 | 10.101  | 0.99741 | -0.00093500 | 0.00012900  |
| 203.572.089.843.750 | 0.97417 | 0.98286 | 0.99246 | 10.011  | 9,49E-01    | 1,89E-01  | 20357 | 0.93657 | 0.92522 | 10.088  | 0.99745 | -0.00064500 | 0.00011500  |
| 203.593.105.468.750 | 0.97444 | 0.98275 | 0.99283 | 10.011  | 0.00014900  | 1,50E-01  | 20359 | 0.93554 | 0.92485 | 10.082  | 0.99749 | -0.00044000 | 5,51E-01    |
| 203.614.121.093.750 | 0.97479 | 0.98265 | 0.99329 | 10.011  | 0.00015800  | 1,12E-01  | 20361 | 0.93473 | 0.92447 | 10.078  | 0.99752 | -0.00041300 | -3,77E-01   |
| 203.636.250.000.000 | 0.97512 | 0.98253 | 0.99372 | 10.011  | 0.00019700  | 1,33E-01  | 20364 | 0.93375 | 0.92407 | 10.072  | 0.99756 | -0.00060200 | -0.00013900 |
| 203.657.285.156.250 | 0.97564 | 0.98242 | 0.99435 | 10.011  | 0.00021500  | 2,58E-02  | 20366 | 0.93213 | 0.92370 | 10.060  | 0.99759 | -0.0010100  | -0.00019700 |
| 203.679.414.062.500 | 0.97605 | 0.98229 | 0.99486 | 10.011  | 0.00020800  | 1,72E-02  | 20368 | 0.92938 | 0.92330 | 10.037  | 0.99763 | -0.0014500  | -0.00019800 |
| 203.700.449.218.750 | 0.97654 | 0.98217 | 0.99545 | 10.011  | 0.00022300  | 5,74E-02  | 20370 | 0.92585 | 0.92293 | 10.006  | 0.99766 | -0.0018700  | -0.00015300 |

|                     |         |         |         |         |             |           |       |         |         |         |         |             |             |
|---------------------|---------|---------|---------|---------|-------------|-----------|-------|---------|---------|---------|---------|-------------|-------------|
| 203.722.617.187.500 | 0.97702 | 0.98204 | 0.99603 | 10.011  | 0.00023300  | 1,17E-01  | 20372 | 0.92130 | 0.92253 | 0.99647 | 0.99770 | -0.0021100  | -3,45E-01   |
| 203.744.765.625.000 | 0.97758 | 0.98191 | 0.99670 | 10.010  | 0.00027500  | 7,77E-02  | 20374 | 0.91648 | 0.92213 | 0.99208 | 0.99773 | -0.0020200  | 0.00012400  |
| 203.765.820.312.500 | 0.97820 | 0.98178 | 0.99743 | 10.010  | 0.00026700  | -1,20E-01 | 20377 | 0.91256 | 0.92176 | 0.98857 | 0.99777 | -0.0015800  | 0.00024100  |
| 203.787.968.750.000 | 0.97873 | 0.98164 | 0.99806 | 10.010  | 0.00022300  | -4,64E-02 | 20379 | 0.90967 | 0.92136 | 0.98611 | 0.99780 | -0.00098000 | 0.00026500  |
| 203.810.156.250.000 | 0.97919 | 0.98150 | 0.99863 | 10.009  | 0.00024600  | 1,19E-01  | 20381 | 0.90822 | 0.92096 | 0.98508 | 0.99783 | -0.00040000 | 0.00021500  |
| 203.832.324.218.750 | 0.97982 | 0.98136 | 0.99936 | 10.009  | 0.00027500  | 1,38E-02  | 20383 | 0.90790 | 0.92057 | 0.98520 | 0.99787 | -2,83E-01   | 0.00010900  |
| 203.854.492.187.500 | 0.98041 | 0.98122 | 10.001  | 10.009  | 0.00025200  | -1,40E-01 | 20385 | 0.90809 | 0.92017 | 0.98582 | 0.99790 | 8,52E-01    | 1,65E-01    |
| 203.876.679.687.500 | 0.98094 | 0.98107 | 10.007  | 10.008  | 0.00021300  | -1,53E-01 | 20388 | 0.90828 | 0.91978 | 0.98643 | 0.99793 | 4,49E-01    | -3,25E-01   |
| 203.898.867.187.500 | 0.98136 | 0.98092 | 10.012  | 10.008  | 0.00018400  | -4,42E-02 | 20390 | 0.90829 | 0.91938 | 0.98687 | 0.99796 | -5,92E-01   | -5,27E-01   |
| 203.921.074.218.750 | 0.98175 | 0.98077 | 10.017  | 10.007  | 0.00019400  | -6,79E-02 | 20392 | 0.90801 | 0.91898 | 0.98703 | 0.99799 | -0.00018900 | -5,48E-01   |
| 203.944.375.000.000 | 0.98224 | 0.98061 | 10.023  | 10.007  | 0.00015300  | -2,05E-01 | 20394 | 0.90743 | 0.91857 | 0.98689 | 0.99803 | -0.00030900 | -5,53E-01   |
| 203.966.582.031.250 | 0.98245 | 0.98046 | 10.026  | 10.006  | 1,00E+00    | -7,75E-02 | 20397 | 0.90661 | 0.91817 | 0.98650 | 0.99806 | -0.00044100 | -3,82E-01   |
| 203.988.789.062.500 | 0.98268 | 0.98030 | 10.030  | 10.006  | 0.00011900  | -7,33E-03 | 20399 | 0.90547 | 0.91777 | 0.98579 | 0.99809 | -0.00047800 | 2,85E-01    |
| 204.012.109.375.000 | 0.98299 | 0.98014 | 10.034  | 10.005  | 9,70E-01    | -1,07E-01 | 20401 | 0.90443 | 0.91736 | 0.98519 | 0.99812 | -0.00031100 | 0.00012300  |
| 204.034.335.937.500 | 0.98313 | 0.97998 | 10.036  | 10.005  | 6,99E-01    | -7,62E-02 | 20403 | 0.90406 | 0.91696 | 0.98524 | 0.99815 | 8,17E-01    | 0.00018400  |
| 204.057.656.250.000 | 0.98331 | 0.97982 | 10.039  | 10.004  | 6,23E-01    | -1,09E-01 | 20406 | 0.90480 | 0.91655 | 0.98644 | 0.99818 | 0.00052900  | 0.00017600  |
| 204.079.882.812.500 | 0.98341 | 0.97966 | 10.041  | 10.004  | 2,03E-01    | -1,61E-01 | 20408 | 0.90646 | 0.91615 | 0.98852 | 0.99821 | 0.00088300  | 0.00010600  |
| 204.103.242.187.500 | 0.98340 | 0.97949 | 10.042  | 10.003  | -1,12E-01   | -1,28E-01 | 20410 | 0.90883 | 0.91574 | 0.99134 | 0.99824 | 0.00101000  | -5,74E-03   |
| 204.126.582.031.250 | 0.98336 | 0.97932 | 10.043  | 10.003  | -3,94E-01   | -1,47E-02 | 20413 | 0.91118 | 0.91532 | 0.99414 | 0.99827 | 0.00088100  | -9,06E-01   |
| 204.148.828.125.000 | 0.98322 | 0.97916 | 10.043  | 10.002  | -1,80E-01   | 1,30E-02  | 20415 | 0.91285 | 0.91493 | 0.99622 | 0.99830 | 0.00059800  | -0.00012700 |
| 204.172.187.500.000 | 0.98328 | 0.97899 | 10.044  | 10.001  | -3,35E-01   | -1,10E-01 | 20417 | 0.91391 | 0.91451 | 0.99773 | 0.99833 | 0.00030200  | -0.00012400 |
| 204.195.566.406.250 | 0.98307 | 0.97883 | 10.043  | 10.001  | -6,92E-01   | -1,11E-01 | 20420 | 0.91425 | 0.91410 | 0.99852 | 0.99836 | 1,73E-01    | -0.00010600 |
| 204.218.925.781.250 | 0.98295 | 0.97866 | 10.043  | 10.000  | -8,53E-01   | -1,59E-01 | 20422 | 0.91399 | 0.91368 | 0.99870 | 0.99839 | -0.00019500 | -7,80E-01   |
| 204.242.304.687.500 | 0.98267 | 0.97849 | 10.041  | 0.99997 | -0.00014400 | -1,48E-01 | 20424 | 0.91335 | 0.91327 | 0.99850 | 0.99842 | -0.00034700 | -4,82E-01   |
| 204.265.683.593.750 | 0.98228 | 0.97832 | 10.039  | 0.99992 | -0.00015500 | 2,07E-02  | 20427 | 0.91237 | 0.91285 | 0.99797 | 0.99845 | -0.00042000 | -1,39E-01   |
| 204.289.082.031.250 | 0.98194 | 0.97816 | 10.036  | 0.99986 | -0.00013400 | -4,77E-02 | 20429 | 0.91138 | 0.91244 | 0.99742 | 0.99848 | -0.00041200 | 1,82E-01    |
| 204.312.480.468.750 | 0.98165 | 0.97799 | 10.035  | 0.99980 | -0.00017700 | -1,17E-01 | 20431 | 0.91044 | 0.91202 | 0.99692 | 0.99851 | -0.00033500 | 5,31E-01    |
| 204.335.878.906.250 | 0.98112 | 0.97783 | 10.030  | 0.99975 | -0.00018800 | 1,69E-02  | 20434 | 0.90981 | 0.91161 | 0.99674 | 0.99854 | -0.00016400 | 8,72E-01    |
| 204.360.390.625.000 | 0.98075 | 0.97766 | 10.028  | 0.99969 | -0.00016900 | 2,02E-03  | 20436 | 0.90965 | 0.91118 | 0.99704 | 0.99857 | 8,26E-01    | 0.00011500  |
| 204.383.808.593.750 | 0.98031 | 0.97750 | 10.025  | 0.99964 | -0.00018700 | -1,62E-01 | 20438 | 0.91021 | 0.91077 | 0.99804 | 0.99860 | 0.00038600  | 0.00012200  |
| 204.407.207.031.250 | 0.97987 | 0.97734 | 10.021  | 0.99959 | -0.00024500 | -1,50E-01 | 20441 | 0.91146 | 0.91035 | 0.99973 | 0.99862 | 0.00065500  | 9,67E-01    |
| 204.431.757.812.500 | 0.97914 | 0.97717 | 10.015  | 0.99954 | -0.00025900 | 2,26E-02  | 20443 | 0.91335 | 0.90992 | 10.021  | 0.99865 | 0.00085000  | 6,05E-01    |
| 204.455.175.781.250 | 0.97863 | 0.97702 | 10.011  | 0.99949 | -0.00023400 | 3,73E-01  | 20446 | 0.91554 | 0.90951 | 10.047  | 0.99868 | 0.00094600  | -2,07E-02   |
| 204.479.726.562.500 | 0.97801 | 0.97686 | 10.006  | 0.99944 | -8,05E-01   | 3,32E-01  | 20448 | 0.91789 | 0.90908 | 10.075  | 0.99871 | 0.00084000  | -8,50E-01   |
| 204.503.164.062.500 | 0.97824 | 0.97670 | 10.009  | 0.99940 | -7,45E-01   | -3,12E-01 | 20450 | 0.91957 | 0.90867 | 10.096  | 0.99874 | 0.00053800  | -0.00015000 |

|                     |         |         |         |         |             |           |       |         |         |         |         |             |             |
|---------------------|---------|---------|---------|---------|-------------|-----------|-------|---------|---------|---------|---------|-------------|-------------|
| 204.527.714.843.750 | 0.97766 | 0.97655 | 10.005  | 0.99936 | -0.00023000 | -3,25E-01 | 20453 | 0.92047 | 0.90824 | 10.110  | 0.99877 | 0.00012100  | -0.00017200 |
| 204.552.285.156.250 | 0.97711 | 0.97640 | 10.000  | 0.99932 | -0.00023400 | 2,19E-02  | 20455 | 0.92016 | 0.90780 | 10.112  | 0.99880 | -0.00030500 | -0.00014600 |
| 204.576.855.468.750 | 0.97650 | 0.97625 | 0.99954 | 0.99928 | -0.00021900 | 5,00E-02  | 20458 | 0.91897 | 0.90737 | 10.104  | 0.99883 | -0.00059600 | -8,29E-01   |
| 204.600.312.500.000 | 0.97606 | 0.97611 | 0.99920 | 0.99925 | -0.00021000 | 5,41E-02  | 20460 | 0.91730 | 0.90697 | 10.092  | 0.99885 | -0.00070300 | -7,21E-02   |
| 204.624.902.343.750 | 0.97549 | 0.97596 | 0.99875 | 0.99922 | -0.00019300 | 7,85E-02  | 20462 | 0.91559 | 0.90654 | 10.079  | 0.99888 | -0.00063100 | 3,74E-01    |
| 204.649.492.187.500 | 0.97511 | 0.97582 | 0.99848 | 0.99919 | -0.00017200 | 1,49E-01  | 20465 | 0.91420 | 0.90611 | 10.070  | 0.99891 | -0.00051900 | 3,04E-01    |
| 204.674.082.031.250 | 0.97465 | 0.97568 | 0.99813 | 0.99916 | -0.00012000 | 1,31E-01  | 20467 | 0.91304 | 0.90568 | 10.063  | 0.99894 | -0.00048100 | -1,49E-01   |
| 204.698.691.406.250 | 0.97452 | 0.97555 | 0.99811 | 0.99914 | -0.00010700 | -4,70E-02 | 20470 | 0.91183 | 0.90525 | 10.055  | 0.99897 | -0.00059200 | -6,73E-01   |
| 204.723.300.781.250 | 0.97412 | 0.97541 | 0.99783 | 0.99912 | -0.00014300 | -3,17E-02 | 20472 | 0.91012 | 0.90482 | 10.043  | 0.99900 | -0.00081200 | -9,59E-01   |
| 204.749.023.437.500 | 0.97379 | 0.97528 | 0.99762 | 0.99910 | -0.00012300 | 1,04E-01  | 20475 | 0.90774 | 0.90438 | 10.024  | 0.99903 | -0.00107000 | -8,76E-01   |
| 204.773.652.343.750 | 0.97350 | 0.97515 | 0.99744 | 0.99908 | -9,10E-01   | 1,23E-01  | 20477 | 0.90471 | 0.90395 | 0.99982 | 0.99906 | -0.00125000 | -2,69E-01   |
| 204.798.281.250.000 | 0.97335 | 0.97502 | 0.99739 | 0.99907 | -6,30E-01   | 4,65E-02  | 20480 | 0.90156 | 0.90353 | 0.99712 | 0.99909 | -0.00121000 | 5,64E-01    |
| 204.822.910.156.250 | 0.97319 | 0.97490 | 0.99735 | 0.99906 | -6,81E-01   | 2,67E-02  | 20482 | 0.89876 | 0.90310 | 0.99478 | 0.99912 | -0.00097500 | 0.00011000  |
| 204.848.671.875.000 | 0.97300 | 0.97477 | 0.99728 | 0.99905 | -4,95E-01   | 1,70E-01  | 20485 | 0.89665 | 0.90266 | 0.99314 | 0.99915 | -0.00065200 | 0.00012800  |
| 204.873.300.781.250 | 0.97294 | 0.97465 | 0.99733 | 0.99904 | 1,74E-01    | 9,97E-02  | 20487 | 0.89548 | 0.90223 | 0.99242 | 0.99918 | -0.00033000 | 0.00011300  |
| 204.899.082.031.250 | 0.97309 | 0.97453 | 0.99760 | 0.99904 | 8,05E-03    | -3,25E-02 | 20490 | 0.89499 | 0.90179 | 0.99240 | 0.99921 | -8,13E-01   | 8,31E-01    |
| 204.923.730.468.750 | 0.97295 | 0.97442 | 0.99756 | 0.99904 | 1,01E-02    | 4,97E-02  | 20492 | 0.89507 | 0.90137 | 0.99294 | 0.99924 | 8,92E-01    | 4,75E-01    |
| 204.949.511.718.750 | 0.97310 | 0.97430 | 0.99783 | 0.99904 | 2,59E-01    | 1,50E-02  | 20495 | 0.89544 | 0.90093 | 0.99378 | 0.99927 | 0.00015800  | 2,04E-01    |
| 204.974.179.687.500 | 0.97308 | 0.97419 | 0.99792 | 0.99904 | 8,58E-02    | -7,44E-02 | 20497 | 0.89587 | 0.90050 | 0.99466 | 0.99930 | 0.00019200  | 1,90E-02    |
| 204.999.980.468.750 | 0.97314 | 0.97408 | 0.99810 | 0.99904 | -1,17E-01   | -5,69E-02 | 20500 | 0.89640 | 0.90006 | 0.99567 | 0.99933 | 0.00016800  | -2,37E-01   |
| 205.025.781.250.000 | 0.97302 | 0.97397 | 0.99809 | 0.99905 | -2,08E-01   | 1,39E-02  | 20503 | 0.89674 | 0.89963 | 0.99647 | 0.99936 | 6,95E-01    | -3,79E-01   |
| 205.051.601.562.500 | 0.97303 | 0.97386 | 0.99823 | 0.99905 | -4,54E-02   | 7,48E-03  | 20505 | 0.89676 | 0.89919 | 0.99697 | 0.99939 | -2,75E-01   | -3,14E-01   |
| 205.077.402.343.750 | 0.97299 | 0.97376 | 0.99830 | 0.99906 | -1,69E-01   | -2,97E-02 | 20508 | 0.89659 | 0.89875 | 0.99727 | 0.99943 | -9,24E-01   | -2,59E-01   |
| 205.103.242.187.500 | 0.97294 | 0.97365 | 0.99837 | 0.99907 | -1,99E-01   | 2,43E-02  | 20510 | 0.89629 | 0.89831 | 0.99743 | 0.99946 | -0.00016100 | -3,05E-01   |
| 205.129.062.500.000 | 0.97289 | 0.97355 | 0.99843 | 0.99909 | -4,39E-02   | 4,48E-02  | 20513 | 0.89576 | 0.89787 | 0.99738 | 0.99949 | -0.00025000 | -3,12E-01   |
| 205.154.902.343.750 | 0.97292 | 0.97345 | 0.99858 | 0.99910 | 3,28E-02    | -2,39E-02 | 20515 | 0.89499 | 0.89744 | 0.99708 | 0.99952 | -0.00032200 | -1,73E-01   |
| 205.180.742.187.500 | 0.97291 | 0.97335 | 0.99868 | 0.99912 | -1,68E-01   | -4,08E-02 | 20518 | 0.89409 | 0.89700 | 0.99665 | 0.99956 | -0.00034000 | -3,46E-02   |
| 205.206.582.031.250 | 0.97284 | 0.97325 | 0.99872 | 0.99913 | -1,78E-01   | -4,43E-02 | 20521 | 0.89324 | 0.89657 | 0.99626 | 0.99959 | -0.00034000 | -3,20E-02   |
| 205.232.441.406.250 | 0.97281 | 0.97315 | 0.99881 | 0.99915 | -3,97E-01   | -4,52E-02 | 20523 | 0.89233 | 0.89613 | 0.99582 | 0.99962 | -0.00035600 | 6,60E-03    |
| 205.258.300.781.250 | 0.97263 | 0.97306 | 0.99875 | 0.99917 | -4,12E-01   | 4,30E-02  | 20526 | 0.89140 | 0.89570 | 0.99535 | 0.99966 | -0.00033700 | 1,71E-01    |
| 205.285.292.968.750 | 0.97260 | 0.97296 | 0.99883 | 0.99919 | -1,70E-01   | 4,85E-02  | 20529 | 0.89055 | 0.89525 | 0.99500 | 0.99969 | -0.00026600 | 3,43E-01    |
| 205.311.171.875.000 | 0.97254 | 0.97287 | 0.99889 | 0.99922 | -1,56E-01   | -4,99E-02 | 20531 | 0.88999 | 0.89482 | 0.99490 | 0.99972 | -0.00015500 | 4,49E-01    |
| 205.338.183.593.750 | 0.97251 | 0.97277 | 0.99898 | 0.99924 | -4,33E-01   | -1,13E-01 | 20534 | 0.88973 | 0.89436 | 0.99513 | 0.99976 | -2,84E-01   | 5,39E-01    |
| 205.364.082.031.250 | 0.97231 | 0.97268 | 0.99889 | 0.99926 | -7,55E-01   | 9,33E-03  | 20536 | 0.88984 | 0.89393 | 0.99570 | 0.99979 | 0.00013000  | 5,92E-01    |
| 205.391.093.750.000 | 0.97211 | 0.97259 | 0.99882 | 0.99929 | -3,84E-01   | 1,29E-01  | 20539 | 0.89042 | 0.89348 | 0.99676 | 0.99983 | 0.00028500  | 4,38E-01    |



|                     |         |         |         |         |           |           |       |         |         |         |         |             |             |
|---------------------|---------|---------|---------|---------|-----------|-----------|-------|---------|---------|---------|---------|-------------|-------------|
| 205.416.992.187.500 | 0.97211 | 0.97250 | 0.99892 | 0.99932 | -7,45E-02 | 3,31E-02  | 20542 | 0.89135 | 0.89305 | 0.99815 | 0.99986 | 0.00036100  | -5,49E-02   |
| 205.444.042.968.750 | 0.97208 | 0.97241 | 0.99901 | 0.99934 | -2,09E-01 | -2,24E-03 | 20544 | 0.89233 | 0.89260 | 0.99962 | 0.99989 | 0.00025600  | -6,88E-01   |
| 205.469.941.406.250 | 0.97200 | 0.97232 | 0.99905 | 0.99937 | -8,64E-02 | 1,20E-02  | 20547 | 0.89270 | 0.89218 | 10.005  | 0.99993 | -2,93E-02   | -9,61E-01   |
| 205.496.992.187.500 | 0.97203 | 0.97223 | 0.99920 | 0.99940 | -1,45E-01 | -1,90E-02 | 20550 | 0.89232 | 0.89173 | 10.006  | 0.99996 | -0.00025300 | -7,19E-01   |
| 205.524.062.500.000 | 0.97192 | 0.97215 | 0.99920 | 0.99943 | -1,89E-01 | -1,80E-02 | 20552 | 0.89133 | 0.89128 | 10.000  | 100.000 | -0.00039200 | -2,44E-01   |
| 205.551.113.281.250 | 0.97193 | 0.97206 | 0.99933 | 0.99946 | -2,43E-01 | -2,27E-02 | 20555 | 0.89019 | 0.89084 | 0.99939 | 10.000  | -0.00038500 | 2,01E-01    |
| 205.578.183.593.750 | 0.97179 | 0.97197 | 0.99931 | 0.99949 | -3,12E-01 | 5,99E-02  | 20558 | 0.88924 | 0.89039 | 0.99892 | 10.001  | -0.00028300 | 4,60E-01    |
| 205.605.273.437.500 | 0.97176 | 0.97188 | 0.99940 | 0.99952 | 8,16E-02  | 2,40E-02  | 20561 | 0.88866 | 0.88994 | 0.99882 | 10.001  | -0.00013600 | 5,26E-01    |
| 205.632.363.281.250 | 0.97183 | 0.97180 | 0.99959 | 0.99956 | -1,82E-01 | -9,67E-02 | 20563 | 0.88851 | 0.88950 | 0.99915 | 10.001  | 1,55E-02    | 4,10E-01    |
| 205.659.453.125.000 | 0.97166 | 0.97171 | 0.99954 | 0.99959 | -4,42E-01 | 5,33E-04  | 20566 | 0.88867 | 0.88905 | 0.99979 | 10.002  | 8,59E-01    | 2,64E-01    |
| 205.686.542.968.750 | 0.97159 | 0.97163 | 0.99958 | 0.99962 | -1,79E-01 | 6,91E-02  | 20569 | 0.88897 | 0.88861 | 10.006  | 10.002  | 0.00014500  | 2,71E-01    |
| 205.713.652.343.750 | 0.97156 | 0.97154 | 0.99967 | 0.99965 | -6,78E-02 | 3,64E-02  | 20571 | 0.88945 | 0.88817 | 10.015  | 10.002  | 0.00023300  | 4,31E-01    |
| 205.741.894.531.250 | 0.97155 | 0.97145 | 0.99979 | 0.99968 | 2,25E-02  | 1,68E-02  | 20574 | 0.89026 | 0.88771 | 10.028  | 10.003  | 0.00038300  | 6,36E-01    |
| 205.769.023.437.500 | 0.97157 | 0.97136 | 0.99992 | 0.99971 | 2,53E-02  | -7,26E-02 | 20577 | 0.89157 | 0.88726 | 10.046  | 10.003  | 0.00058500  | 6,39E-01    |
| 205.796.152.343.750 | 0.97157 | 0.97128 | 10.000  | 0.99975 | -3,71E-01 | -5,32E-02 | 20580 | 0.89343 | 0.88682 | 10.070  | 10.003  | 0.00073000  | 2,88E-01    |
| 205.824.433.593.750 | 0.97137 | 0.97119 | 0.99996 | 0.99978 | -2,70E-01 | 5,94E-02  | 20582 | 0.89562 | 0.88636 | 10.096  | 10.004  | 0.00074400  | -3,08E-01   |
| 205.851.562.500.000 | 0.97142 | 0.97110 | 10.001  | 0.99981 | -4,23E-02 | 3,16E-02  | 20585 | 0.89756 | 0.88592 | 10.121  | 10.004  | 0.00055900  | -9,83E-01   |
| 205.879.843.750.000 | 0.97135 | 0.97101 | 10.002  | 0.99984 | -9,47E-02 | 1,38E-02  | 20588 | 0.89871 | 0.88546 | 10.137  | 10.004  | 0.00019900  | -0.00014400 |
| 205.907.011.718.750 | 0.97137 | 0.97093 | 10.003  | 0.99987 | 3,44E-02  | 3,05E-02  | 20591 | 0.89866 | 0.88502 | 10.141  | 10.005  | -0.00023700 | -0.00014500 |
| 205.935.312.500.000 | 0.97136 | 0.97083 | 10.004  | 0.99990 | 7,46E-02  | 7,16E-03  | 20594 | 0.89740 | 0.88456 | 10.134  | 10.005  | -0.00060500 | -0.00010500 |
| 205.963.613.281.250 | 0.97141 | 0.97074 | 10.006  | 0.99993 | 7,49E-02  | 6,51E-03  | 20596 | 0.89524 | 0.88411 | 10.117  | 10.006  | -0.00083100 | -6,14E-01   |
| 205.990.800.781.250 | 0.97141 | 0.97065 | 10.007  | 0.99995 | 1,11E-01  | 3,43E-02  | 20599 | 0.89279 | 0.88367 | 10.097  | 10.006  | -0.00094500 | -3,59E-01   |
| 206.019.121.093.750 | 0.97147 | 0.97056 | 10.009  | 0.99998 | 2,65E-01  | -1,22E-03 | 20602 | 0.88999 | 0.88321 | 10.074  | 10.006  | -0.0010300  | -2,94E-01   |
| 206.047.441.406.250 | 0.97156 | 0.97046 | 10.011  | 10.000  | 1,04E-01  | -2,88E-02 | 20605 | 0.88695 | 0.88275 | 10.049  | 10.007  | -0.0011100  | -1,95E-01   |
| 206.075.781.250.000 | 0.97153 | 0.97037 | 10.012  | 10.000  | 1,02E-01  | 2,40E-02  | 20608 | 0.88369 | 0.88230 | 10.021  | 10.007  | -0.0011400  | 1,12E-01    |
| 206.104.140.625.000 | 0.97161 | 0.97027 | 10.014  | 10.001  | 2,40E-01  | 5,29E-03  | 20610 | 0.88048 | 0.88184 | 0.99936 | 10.007  | -0.0010500  | 5,95E-01    |
| 206.132.480.468.750 | 0.97166 | 0.97017 | 10.016  | 10.001  | 1,32E-01  | -6,89E-02 | 20613 | 0.87775 | 0.88138 | 0.99712 | 10.008  | -0.00080400 | 9,82E-01    |
| 206.160.839.843.750 | 0.97169 | 0.97007 | 10.017  | 10.001  | -1,51E-01 | -1,11E-01 | 20616 | 0.87592 | 0.88093 | 0.99578 | 10.008  | -0.00049200 | 9,96E-01    |
| 206.189.218.750.000 | 0.97158 | 0.96997 | 10.017  | 10.001  | -4,96E-01 | -1,97E-02 | 20619 | 0.87496 | 0.88047 | 0.99531 | 10.008  | -0.00023800 | 6,53E-01    |
| 206.217.597.656.250 | 0.97141 | 0.96987 | 10.017  | 10.001  | -2,63E-01 | 4,32E-02  | 20622 | 0.87457 | 0.88002 | 0.99540 | 10.009  | -0.00012100 | 2,17E-01    |
| 206.245.976.562.500 | 0.97143 | 0.96977 | 10.018  | 10.001  | -2,51E-01 | -3,24E-02 | 20625 | 0.87428 | 0.87956 | 0.99559 | 10.009  | -0.00011500 | -7,73E-02   |
| 206.275.507.812.500 | 0.97126 | 0.96966 | 10.018  | 10.002  | -4,51E-01 | 9,89E-03  | 20628 | 0.87390 | 0.87909 | 0.99573 | 10.009  | -0.00016500 | -2,61E-01   |
| 206.303.906.250.000 | 0.97117 | 0.96955 | 10.018  | 10.002  | -1,94E-01 | 1,71E-02  | 20630 | 0.87332 | 0.87864 | 0.99563 | 10.009  | -0.00026600 | -3,95E-01   |
| 206.332.324.218.750 | 0.97115 | 0.96944 | 10.019  | 10.002  | -3,53E-01 | -6,84E-02 | 20633 | 0.87239 | 0.87818 | 0.99518 | 10.010  | -0.00039000 | -3,46E-01   |
| 206.361.875.000.000 | 0.97096 | 0.96933 | 10.018  | 10.002  | -5,90E-01 | -5,33E-03 | 20636 | 0.87106 | 0.87771 | 0.99436 | 10.010  | -0.00046700 | -1,18E-01   |

|                     |         |         |         |         |             |           |       |         |         |         |        |             |           |
|---------------------|---------|---------|---------|---------|-------------|-----------|-------|---------|---------|---------|--------|-------------|-----------|
| 206.390.292.968.750 | 0.97081 | 0.96922 | 10.018  | 10.002  | -3,84E-01   | -8,62E-03 | 20639 | 0.86968 | 0.87726 | 0.99347 | 10.010 | -0.00045800 | 2,45E-01  |
| 206.419.863.281.250 | 0.97074 | 0.96910 | 10.018  | 10.002  | -6,40E-01   | -8,53E-02 | 20642 | 0.86840 | 0.87679 | 0.99268 | 10.011 | -0.00032400 | 6,48E-01  |
| 206.448.320.312.500 | 0.97044 | 0.96899 | 10.017  | 10.002  | -8,79E-01   | -7,95E-03 | 20645 | 0.86780 | 0.87633 | 0.99257 | 10.011 | -8,20E-01   | 8,55E-01  |
| 206.477.910.156.250 | 0.97023 | 0.96887 | 10.016  | 10.002  | -6,86E-01   | 5,53E-02  | 20648 | 0.86792 | 0.87586 | 0.99319 | 10.011 | 0.00017200  | 7,37E-01  |
| 206.507.500.000.000 | 0.97003 | 0.96875 | 10.015  | 10.002  | -5,52E-01   | 6,99E-03  | 20651 | 0.86882 | 0.87539 | 0.99459 | 10.012 | 0.00035400  | 4,01E-01  |
| 206.535.957.031.250 | 0.96991 | 0.96864 | 10.015  | 10.002  | -6,46E-01   | -6,03E-02 | 20654 | 0.86998 | 0.87494 | 0.99623 | 10.012 | 0.00040500  | 1,06E-02  |
| 206.565.585.937.500 | 0.96966 | 0.96852 | 10.014  | 10.002  | -9,02E-01   | -4,89E-02 | 20657 | 0.87117 | 0.87447 | 0.99792 | 10.012 | 0.00036000  | -2,20E-01 |
| 206.595.195.312.500 | 0.96938 | 0.96840 | 10.012  | 10.002  | -9,36E-01   | -6,04E-02 | 20660 | 0.87211 | 0.87400 | 0.99936 | 10.012 | 0.00027500  | -3,12E-01 |
| 206.624.824.218.750 | 0.96910 | 0.96827 | 10.011  | 10.002  | -0.00012600 | -4,69E-02 | 20662 | 0.87280 | 0.87353 | 10.005  | 10.013 | 0.00017600  | -3,31E-01 |
| 206.654.472.656.250 | 0.96863 | 0.96815 | 10.007  | 10.002  | -0.00012100 | 6,84E-02  | 20665 | 0.87316 | 0.87306 | 10.014  | 10.013 | 7,84E-01    | -3,03E-01 |
| 206.684.121.093.750 | 0.96838 | 0.96802 | 10.006  | 10.002  | -8,54E-01   | 8,02E-02  | 20668 | 0.87326 | 0.87259 | 10.020  | 10.013 | -3,94E-02   | -2,67E-01 |
| 206.713.769.531.250 | 0.96812 | 0.96790 | 10.004  | 10.002  | -7,38E-01   | 2,35E-02  | 20671 | 0.87313 | 0.87212 | 10.024  | 10.013 | -7,99E-01   | -2,35E-01 |
| 206.743.437.500.000 | 0.96795 | 0.96777 | 10.004  | 10.002  | -7,15E-01   | -3,85E-02 | 20674 | 0.87279 | 0.87165 | 10.025  | 10.014 | -0.00014300 | -1,51E-01 |
| 206.773.105.468.750 | 0.96770 | 0.96765 | 10.003  | 10.002  | -9,66E-01   | -7,80E-02 | 20677 | 0.87228 | 0.87118 | 10.025  | 10.014 | -0.00016900 | 9,08E-03  |
| 206.802.792.968.750 | 0.96737 | 0.96752 | 10.001  | 10.002  | -0.00011800 | -2,69E-02 | 20680 | 0.87178 | 0.87071 | 10.025  | 10.014 | -0.00013800 | 1,30E-01  |
| 206.833.632.812.500 | 0.96699 | 0.96738 | 0.99979 | 10.002  | -0.00011300 | 3,37E-02  | 20683 | 0.87145 | 0.87022 | 10.027  | 10.014 | -9,06E-01   | 1,44E-01  |
| 206.863.320.312.500 | 0.96669 | 0.96726 | 0.99961 | 10.002  | -9,74E-01   | 2,82E-02  | 20686 | 0.87123 | 0.86975 | 10.029  | 10.015 | -5,06E-01   | 1,34E-01  |
| 206.893.027.343.750 | 0.96641 | 0.96713 | 0.99945 | 10.002  | -9,61E-01   | 8,53E-03  | 20689 | 0.87115 | 0.86928 | 10.034  | 10.015 | -1,08E-01   | 1,48E-01  |
| 206.923.886.718.750 | 0.96611 | 0.96699 | 0.99928 | 10.002  | -9,22E-01   | -1,76E-03 | 20692 | 0.87117 | 0.86879 | 10.039  | 10.015 | 3,89E-01    | 1,58E-01  |
| 206.953.613.281.250 | 0.96585 | 0.96686 | 0.99914 | 10.001  | -9,72E-01   | -2,44E-02 | 20695 | 0.87138 | 0.86832 | 10.046  | 10.015 | 8,51E-01    | 1,17E-01  |
| 206.984.492.187.500 | 0.96552 | 0.96672 | 0.99893 | 10.001  | -0.00010700 | 2,90E-02  | 20698 | 0.87168 | 0.86783 | 10.054  | 10.015 | 0.00011000  | 8,10E-02  |
| 207.014.238.281.250 | 0.96520 | 0.96659 | 0.99873 | 10.001  | -7,96E-01   | 5,36E-02  | 20701 | 0.87205 | 0.86736 | 10.063  | 10.016 | 0.00013400  | 3,51E-02  |
| 207.045.136.718.750 | 0.96504 | 0.96646 | 0.99869 | 10.001  | -7,45E-01   | -2,05E-02 | 20705 | 0.87250 | 0.86688 | 10.072  | 10.016 | 0.00013100  | -9,90E-02 |
| 207.076.035.156.250 | 0.96474 | 0.96632 | 0.99852 | 10.001  | -9,23E-01   | -2,82E-02 | 20708 | 0.87286 | 0.86639 | 10.081  | 10.016 | 7,31E-01    | -2,85E-01 |
| 207.106.953.125.000 | 0.96447 | 0.96618 | 0.99837 | 10.001  | -9,19E-01   | -1,23E-03 | 20711 | 0.87295 | 0.86590 | 10.087  | 10.016 | -4,49E-01   | -4,63E-01 |
| 207.136.738.281.250 | 0.96418 | 0.96605 | 0.99820 | 10.001  | -9,30E-01   | 2,18E-02  | 20714 | 0.87259 | 0.86543 | 10.088  | 10.016 | -0.00020800 | -5,27E-01 |
| 207.167.675.781.250 | 0.96390 | 0.96591 | 0.99805 | 10.001  | -7,87E-01   | 7,80E-03  | 20717 | 0.87169 | 0.86494 | 10.084  | 10.017 | -0.00036500 | -4,04E-01 |
| 207.198.613.281.250 | 0.96369 | 0.96577 | 0.99796 | 10.000  | -8,82E-01   | -1,26E-02 | 20720 | 0.87033 | 0.86445 | 10.075  | 10.017 | -0.00045800 | -1,65E-01 |
| 207.229.570.312.500 | 0.96335 | 0.96564 | 0.99774 | 10.000  | -8,64E-01   | 6,44E-02  | 20723 | 0.86885 | 0.86396 | 10.066  | 10.017 | -0.00046700 | 6,79E-02  |
| 207.260.527.343.750 | 0.96316 | 0.96550 | 0.99767 | 10.000  | -4,83E-01   | 8,72E-02  | 20726 | 0.86744 | 0.86347 | 10.057  | 10.017 | -0.00041600 | 1,52E-01  |
| 207.291.503.906.250 | 0.96306 | 0.96536 | 0.99769 | 100.000 | -3,25E-01   | 3,46E-02  | 20729 | 0.86627 | 0.86298 | 10.050  | 10.017 | -0.00037200 | -2,03E-02 |
| 207.322.480.468.750 | 0.96296 | 0.96522 | 0.99771 | 0.99998 | -2,69E-01   | 2,80E-03  | 20732 | 0.86513 | 0.86249 | 10.043  | 10.017 | -0.00042900 | -2,75E-01 |
| 207.353.476.562.500 | 0.96289 | 0.96509 | 0.99777 | 0.99996 | -3,07E-01   | -9,70E-03 | 20735 | 0.86362 | 0.86201 | 10.033  | 10.017 | -0.00054300 | -2,72E-01 |
| 207.385.625.000.000 | 0.96276 | 0.96494 | 0.99777 | 0.99995 | -3,30E-01   | 4,95E-02  | 20739 | 0.86170 | 0.86150 | 10.019  | 10.017 | -0.00060100 | -1,48E-02 |
| 207.416.621.093.750 | 0.96268 | 0.96481 | 0.99781 | 0.99993 | 5,33E-03    | 2,80E-02  | 20742 | 0.85982 | 0.86101 | 10.006  | 10.017 | -0.00055200 | 2,70E-01  |

|                     |         |         |         |         |           |           |       |         |         |         |        |             |           |
|---------------------|---------|---------|---------|---------|-----------|-----------|-------|---------|---------|---------|--------|-------------|-----------|
| 207.447.636.718.750 | 0.96277 | 0.96467 | 0.99801 | 0.99992 | -1,56E-01 | 1,06E-02  | 20745 | 0.85828 | 0.86052 | 0.99951 | 10.018 | -0.00043300 | 3,94E-01  |
| 207.479.824.218.750 | 0.96258 | 0.96453 | 0.99796 | 0.99990 | 7,26E-02  | 8,95E-02  | 20748 | 0.85709 | 0.86001 | 0.99883 | 10.018 | -0.00030300 | 3,33E-01  |
| 207.510.859.375.000 | 0.96281 | 0.96439 | 0.99831 | 0.99988 | 4,10E-01  | 4,21E-02  | 20751 | 0.85636 | 0.85952 | 0.99860 | 10.018 | -0.00022300 | 1,37E-01  |
| 207.541.914.062.500 | 0.96284 | 0.96425 | 0.99845 | 0.99987 | 3,34E-01  | -3,90E-02 | 20754 | 0.85570 | 0.85903 | 0.99844 | 10.018 | -0.00021800 | -7,04E-02 |
| 207.574.121.093.750 | 0.96302 | 0.96411 | 0.99876 | 0.99985 | 1,63E-01  | -1,08E-01 | 20757 | 0.85498 | 0.85853 | 0.99823 | 10.018 | -0.00026700 | -2,65E-01 |
| 207.605.175.781.250 | 0.96294 | 0.96398 | 0.99880 | 0.99984 | -3,50E-01 | -5,08E-02 | 20761 | 0.85401 | 0.85804 | 0.99775 | 10.018 | -0.00038600 | -3,38E-01 |
| 207.637.402.343.750 | 0.96280 | 0.96384 | 0.99879 | 0.99982 | -1,58E-01 | 9,80E-02  | 20764 | 0.85254 | 0.85753 | 0.99679 | 10.018 | -0.00048100 | -1,58E-01 |
| 207.669.648.437.500 | 0.96284 | 0.96370 | 0.99895 | 0.99981 | 2,82E-01  | 7,98E-02  | 20767 | 0.85091 | 0.85702 | 0.99567 | 10.018 | -0.00048800 | 1,23E-01  |
| 207.700.742.187.500 | 0.96298 | 0.96357 | 0.99921 | 0.99979 | 3,47E-01  | 2,09E-02  | 20770 | 0.84945 | 0.85653 | 0.99470 | 10.018 | -0.00040300 | 3,50E-01  |
| 207.732.988.281.250 | 0.96306 | 0.96343 | 0.99941 | 0.99978 | 4,14E-01  | 8,07E-03  | 20773 | 0.84835 | 0.85603 | 0.99411 | 10.018 | -0.00026600 | 3,99E-01  |
| 207.765.253.906.250 | 0.96325 | 0.96329 | 0.99972 | 0.99977 | 3,99E-01  | -1,87E-02 | 20777 | 0.84773 | 0.85552 | 0.99400 | 10.018 | -0.00014600 | 3,42E-01  |
| 207.797.539.062.500 | 0.96332 | 0.96316 | 0.99991 | 0.99975 | 2,93E-01  | -1,66E-02 | 20780 | 0.84741 | 0.85501 | 0.99419 | 10.018 | -4,55E-01   | 3,34E-01  |
| 207.829.824.218.750 | 0.96344 | 0.96302 | 10.002  | 0.99974 | 2,92E-01  | -4,64E-02 | 20783 | 0.84744 | 0.85451 | 0.99472 | 10.018 | 6,99E-01    | 3,88E-01  |
| 207.862.128.906.250 | 0.96350 | 0.96289 | 10.003  | 0.99973 | -6,46E-03 | -1,01E-01 | 20786 | 0.84786 | 0.85400 | 0.99565 | 10.018 | 0.00020500  | 4,15E-01  |
| 207.894.433.593.750 | 0.96343 | 0.96275 | 10.004  | 0.99972 | -3,61E-01 | -2,72E-02 | 20789 | 0.84876 | 0.85349 | 0.99706 | 10.018 | 0.00033800  | 3,31E-01  |
| 207.926.757.812.500 | 0.96327 | 0.96262 | 10.004  | 0.99971 | -1,82E-01 | 2,40E-02  | 20793 | 0.85005 | 0.85299 | 0.99884 | 10.018 | 0.00041900  | 1,37E-01  |
| 207.959.082.031.250 | 0.96332 | 0.96249 | 10.005  | 0.99970 | -2,06E-01 | -7,64E-04 | 20796 | 0.85147 | 0.85248 | 10.008  | 10.018 | 0.00042700  | -8,22E-02 |
| 207.991.425.781.250 | 0.96314 | 0.96236 | 10.005  | 0.99970 | -1,87E-01 | -1,72E-02 | 20799 | 0.85281 | 0.85197 | 10.026  | 10.018 | 0.00036600  | -3,07E-01 |
| 208.023.769.531.250 | 0.96319 | 0.96223 | 10.007  | 0.99969 | -3,18E-01 | -6,98E-02 | 20802 | 0.85384 | 0.85147 | 10.041  | 10.018 | 0.00022800  | -4,85E-01 |
| 208.057.285.156.250 | 0.96293 | 0.96210 | 10.005  | 0.99968 | -6,47E-01 | 1,99E-02  | 20806 | 0.85431 | 0.85094 | 10.051  | 10.018 | 4,65E-01    | -5,37E-01 |
| 208.089.648.437.500 | 0.96277 | 0.96198 | 10.005  | 0.99968 | -1,87E-01 | 8,37E-02  | 20809 | 0.85414 | 0.85044 | 10.055  | 10.018 | -0.00012600 | -4,60E-01 |
| 208.122.031.250.000 | 0.96281 | 0.96185 | 10.006  | 0.99968 | -1,05E-01 | -3,59E-02 | 20812 | 0.85349 | 0.84993 | 10.053  | 10.018 | -0.00025100 | -2,59E-01 |
| 208.155.566.406.250 | 0.96270 | 0.96172 | 10.007  | 0.99967 | -4,24E-01 | -2,68E-02 | 20816 | 0.85249 | 0.84941 | 10.048  | 10.017 | -0.00029600 | -3,34E-02 |
| 208.187.968.750.000 | 0.96253 | 0.96160 | 10.006  | 0.99967 | -2,82E-01 | 8,50E-03  | 20819 | 0.85154 | 0.84891 | 10.044  | 10.017 | -0.00027300 | 1,36E-01  |
| 208.221.542.968.750 | 0.96251 | 0.96147 | 10.007  | 0.99967 | -3,67E-01 | -3,28E-02 | 20822 | 0.85068 | 0.84838 | 10.040  | 10.017 | -0.00020600 | 2,36E-01  |
| 208.253.964.843.750 | 0.96228 | 0.96135 | 10.006  | 0.99967 | -4,98E-01 | -7,84E-03 | 20825 | 0.85018 | 0.84788 | 10.040  | 10.017 | -0.00011800 | 2,62E-01  |
| 208.287.558.593.750 | 0.96218 | 0.96123 | 10.006  | 0.99967 | -4,19E-01 | -7,28E-03 | 20829 | 0.84991 | 0.84736 | 10.043  | 10.017 | -3,34E-01   | 2,27E-01  |
| 208.321.152.343.750 | 0.96200 | 0.96111 | 10.006  | 0.99967 | -5,47E-01 | -7,67E-03 | 20832 | 0.84995 | 0.84683 | 10.048  | 10.017 | 3,50E-01    | 1,26E-01  |
| 208.353.613.281.250 | 0.96182 | 0.96099 | 10.005  | 0.99968 | -4,70E-01 | 1,98E-02  | 20835 | 0.85014 | 0.84633 | 10.055  | 10.017 | 4,95E-01    | -4,88E-02 |
| 208.387.226.562.500 | 0.96169 | 0.96087 | 10.005  | 0.99968 | -4,17E-01 | -2,49E-02 | 20839 | 0.85028 | 0.84581 | 10.062  | 10.017 | 2,73E-02    | -2,18E-01 |
| 208.420.859.375.000 | 0.96154 | 0.96075 | 10.005  | 0.99969 | -6,37E-01 | -3,42E-02 | 20842 | 0.85016 | 0.84529 | 10.065  | 10.017 | -9,70E-01   | -3,04E-01 |
| 208.454.511.718.750 | 0.96126 | 0.96063 | 10.003  | 0.99969 | -6,47E-01 | 2,82E-02  | 20845 | 0.84963 | 0.84477 | 10.065  | 10.017 | -0.00020100 | -2,66E-01 |
| 208.488.164.062.500 | 0.96111 | 0.96052 | 10.003  | 0.99970 | -4,48E-01 | 1,04E-01  | 20849 | 0.84880 | 0.84425 | 10.062  | 10.016 | -0.00027600 | -1,54E-01 |
| 208.521.816.406.250 | 0.96096 | 0.96040 | 10.003  | 0.99970 | 5,20E-02  | 5,65E-02  | 20852 | 0.84777 | 0.84373 | 10.057  | 10.016 | -0.00030500 | -3,43E-02 |
| 208.555.507.812.500 | 0.96114 | 0.96029 | 10.006  | 0.99971 | -6,70E-02 | 2,60E-02  | 20856 | 0.84674 | 0.84321 | 10.052  | 10.016 | -0.00029900 | 1,38E-02  |

|                     |         |         |         |         |             |           |       |         |         |         |        |             |           |
|---------------------|---------|---------|---------|---------|-------------|-----------|-------|---------|---------|---------|--------|-------------|-----------|
| 208.589.179.687.500 | 0.96092 | 0.96017 | 10.005  | 0.99972 | 2,27E-01    | -2,66E-03 | 20859 | 0.84575 | 0.84269 | 10.047  | 10.016 | -0.00029600 | -4,61E-02 |
| 208.622.890.625.000 | 0.96130 | 0.96006 | 10.010  | 0.99973 | -8,50E-02   | -1,34E-01 | 20862 | 0.84475 | 0.84217 | 10.042  | 10.016 | -0.00033000 | -1,15E-01 |
| 208.656.601.562.500 | 0.96086 | 0.95994 | 10.007  | 0.99974 | -6,78E-01   | 3,15E-02  | 20866 | 0.84353 | 0.84166 | 10.034  | 10.016 | -0.00037300 | -1,08E-01 |
| 208.690.312.500.000 | 0.96084 | 0.95983 | 10.008  | 0.99975 | 1,28E-01    | -2,22E-01 | 20869 | 0.84223 | 0.84114 | 10.027  | 10.016 | -0.00040300 | -5,94E-02 |
| 208.725.214.843.750 | 0.96095 | 0.95972 | 10.010  | 0.99976 | -0.00022000 | -2,01E-01 | 20873 | 0.84076 | 0.84060 | 10.017  | 10.015 | -0.00041400 | 8,77E-03  |
| 208.758.964.843.750 | 0.95933 | 0.95961 | 0.99949 | 0.99977 | -0.00012500 | 4,35E-01  | 20876 | 0.83939 | 0.84009 | 10.008  | 10.015 | -0.00039700 | 7,79E-02  |
| 208.792.714.843.750 | 0.96010 | 0.95950 | 10.004  | 0.99978 | 7,35E-01    | 8,49E-02  | 20879 | 0.83808 | 0.83957 | 10.000  | 10.015 | -0.00036100 | 1,01E-01  |
| 208.827.636.718.750 | 0.95983 | 0.95939 | 10.002  | 0.99979 | -6,70E-01   | -1,84E-01 | 20883 | 0.83691 | 0.83904 | 0.99936 | 10.015 | -0.00032700 | 8,36E-02  |
| 208.861.425.781.250 | 0.95964 | 0.95928 | 10.002  | 0.99980 | -5,29E-01   | 1,01E-02  | 20886 | 0.83584 | 0.83852 | 0.99879 | 10.015 | -0.00030400 | 3,41E-02  |
| 208.896.367.187.500 | 0.95947 | 0.95917 | 10.001  | 0.99982 | -6,01E-01   | -6,88E-03 | 20890 | 0.83482 | 0.83799 | 0.99828 | 10.015 | -0.00030400 | -1,37E-02 |
| 208.930.175.781.250 | 0.95923 | 0.95906 | 100.000 | 0.99983 | -5,76E-01   | 3,10E-02  | 20893 | 0.83375 | 0.83748 | 0.99771 | 10.014 | -0.00031300 | 1,87E-02  |
| 208.965.156.250.000 | 0.95907 | 0.95895 | 0.99997 | 0.99984 | -3,88E-01   | 4,27E-02  | 20897 | 0.83266 | 0.83695 | 0.99713 | 10.014 | -0.00029100 | 1,01E-01  |
| 209.000.136.718.750 | 0.95896 | 0.95884 | 0.99997 | 0.99986 | -2,78E-01   | -7,63E-03 | 20900 | 0.83171 | 0.83642 | 0.99669 | 10.014 | -0.00024300 | 1,99E-01  |
| 209.033.964.843.750 | 0.95888 | 0.95873 | 10.000  | 0.99987 | -4,41E-01   | -4,68E-02 | 20903 | 0.83099 | 0.83591 | 0.99646 | 10.014 | -0.00015400 | 3,05E-01  |
| 209.068.984.375.000 | 0.95865 | 0.95863 | 0.99991 | 0.99989 | -6,00E-01   | -1,46E-02 | 20907 | 0.83065 | 0.83538 | 0.99663 | 10.014 | -3,31E-01   | 3,06E-01  |
| 209.104.003.906.250 | 0.95846 | 0.95852 | 0.99985 | 0.99990 | -5,43E-01   | 3,35E-02  | 20910 | 0.83076 | 0.83485 | 0.99725 | 10.013 | 6,04E-01    | 1,76E-01  |
| 209.139.042.968.750 | 0.95827 | 0.95841 | 0.99978 | 0.99992 | -3,65E-01   | 4,45E-02  | 20914 | 0.83107 | 0.83432 | 0.99807 | 10.013 | 9,05E-01    | 4,37E-02  |
| 209.174.082.031.250 | 0.95821 | 0.95830 | 0.99983 | 0.99993 | -2,31E-01   | 3,17E-03  | 20917 | 0.83139 | 0.83380 | 0.99890 | 10.013 | 9,10E-01    | -3,29E-02 |
| 209.209.140.625.000 | 0.95811 | 0.95820 | 0.99986 | 0.99995 | -3,43E-01   | -3,62E-02 | 20921 | 0.83171 | 0.83327 | 0.99972 | 10.013 | 6,74E-01    | -6,82E-02 |
| 209.244.218.750.000 | 0.95797 | 0.95809 | 0.99984 | 0.99996 | -4,85E-01   | -1,42E-02 | 20924 | 0.83187 | 0.83274 | 10.004  | 10.013 | 4,32E-01    | -4,45E-02 |
| 209.279.296.875.000 | 0.95777 | 0.95799 | 0.99976 | 0.99998 | -4,43E-01   | 4,30E-03  | 20928 | 0.83202 | 0.83222 | 10.010  | 10.012 | 3,62E-01    | -6,46E-02 |
| 209.314.394.531.250 | 0.95765 | 0.95788 | 0.99977 | 100.000 | -4,54E-01   | 6,77E-03  | 20931 | 0.83212 | 0.83170 | 10.016  | 10.012 | -2,13E-02   | -1,34E-01 |
| 209.349.511.718.750 | 0.95745 | 0.95778 | 0.99969 | 10.000  | -3,95E-01   | 1,53E-02  | 20935 | 0.83200 | 0.83117 | 10.020  | 10.012 | -5,77E-01   | -1,65E-01 |
| 209.384.628.906.250 | 0.95738 | 0.95767 | 0.99973 | 10.000  | -3,47E-01   | 3,58E-03  | 20938 | 0.83171 | 0.83065 | 10.022  | 10.012 | -0.00011800 | -1,59E-01 |
| 209.420.917.968.750 | 0.95720 | 0.95756 | 0.99969 | 10.000  | -3,70E-01   | 1,18E-02  | 20942 | 0.83116 | 0.83011 | 10.022  | 10.011 | -0.00017100 | -1,18E-01 |
| 209.456.074.218.750 | 0.95711 | 0.95746 | 0.99972 | 10.001  | -2,62E-01   | 8,81E-03  | 20946 | 0.83049 | 0.82959 | 10.020  | 10.011 | -0.00020200 | -5,20E-02 |
| 209.491.230.468.750 | 0.95702 | 0.95736 | 0.99974 | 10.001  | -3,08E-01   | -2,12E-02 | 20949 | 0.82974 | 0.82907 | 10.018  | 10.011 | -0.00020700 | 1,43E-02  |
| 209.527.558.593.750 | 0.95689 | 0.95725 | 0.99974 | 10.001  | -4,14E-01   | -2,25E-02 | 20953 | 0.82901 | 0.82853 | 10.016  | 10.011 | -0.00019200 | 3,14E-02  |
| 209.562.753.906.250 | 0.95672 | 0.95714 | 0.99969 | 10.001  | -4,68E-01   | 2,22E-02  | 20956 | 0.82836 | 0.82802 | 10.014  | 10.011 | -0.00018500 | 4,30E-02  |
| 209.597.929.687.500 | 0.95656 | 0.95704 | 0.99965 | 10.001  | -2,58E-01   | 4,76E-02  | 20960 | 0.82771 | 0.82750 | 10.012  | 10.010 | -0.00016200 | 7,91E-02  |
| 209.634.316.406.250 | 0.95654 | 0.95693 | 0.99975 | 10.001  | -1,28E-01   | -4,93E-03 | 20963 | 0.82721 | 0.82697 | 10.013  | 10.010 | -0.00012800 | 1,17E-01  |
| 209.670.703.125.000 | 0.95647 | 0.95683 | 0.99980 | 10.002  | -2,94E-01   | -3,23E-02 | 20967 | 0.82677 | 0.82643 | 10.013  | 10.010 | -7,62E-01   | 1,62E-01  |
| 209.705.937.500.000 | 0.95633 | 0.95672 | 0.99978 | 10.002  | -3,59E-01   | 2,53E-03  | 20971 | 0.82666 | 0.82592 | 10.017  | 10.010 | -1,25E-01   | 1,37E-01  |
| 209.742.343.750.000 | 0.95621 | 0.95662 | 0.99978 | 10.002  | -2,76E-01   | -4,40E-03 | 20974 | 0.82668 | 0.82539 | 10.022  | 10.009 | 2,20E-01    | 5,16E-02  |
| 209.778.769.531.250 | 0.95613 | 0.95651 | 0.99982 | 10.002  | -3,91E-01   | -2,20E-02 | 20978 | 0.82682 | 0.82486 | 10.029  | 10.009 | 2,51E-01    | -6,80E-02 |

|                     |         |         |         |        |           |           |       |         |         |         |         |             |           |
|---------------------|---------|---------|---------|--------|-----------|-----------|-------|---------|---------|---------|---------|-------------|-----------|
| 209.814.042.968.750 | 0.95593 | 0.95640 | 0.99974 | 10.002 | -4,34E-01 | 3,16E-02  | 20981 | 0.82686 | 0.82435 | 10.034  | 10.009  | -2,67E-01   | -1,70E-01 |
| 209.850.488.281.250 | 0.95582 | 0.95630 | 0.99975 | 10.002 | -1,64E-01 | 3,14E-02  | 20985 | 0.82663 | 0.82382 | 10.037  | 10.009  | -9,66E-01   | -1,82E-01 |
| 209.886.953.125.000 | 0.95581 | 0.95619 | 0.99987 | 10.002 | -2,05E-01 | -1,07E-02 | 20989 | 0.82616 | 0.82329 | 10.037  | 10.008  | -0.00015900 | -1,39E-01 |
| 209.923.437.500.000 | 0.95567 | 0.95608 | 0.99984 | 10.003 | -2,43E-01 | 4,50E-03  | 20992 | 0.82547 | 0.82276 | 10.035  | 10.008  | -0.00019800 | -7,67E-02 |
| 209.959.921.875.000 | 0.95564 | 0.95597 | 0.99993 | 10.003 | -1,72E-01 | -6,41E-04 | 20996 | 0.82471 | 0.82224 | 10.033  | 10.008  | -0.00021500 | -2,93E-02 |
| 209.996.425.781.250 | 0.95554 | 0.95586 | 0.99995 | 10.003 | -2,47E-01 | -2,46E-02 | 21000 | 0.82390 | 0.82171 | 10.029  | 10.008  | -0.00021900 | 1,59E-02  |
| 210.032.949.218.750 | 0.95546 | 0.95576 | 0.99999 | 10.003 | -3,52E-01 | -4,95E-03 | 21003 | 0.82311 | 0.82119 | 10.027  | 10.007  | -0.00020400 | 7,82E-03  |
| 210.069.472.656.250 | 0.95528 | 0.95565 | 0.99994 | 10.003 | -2,83E-01 | 2,80E-02  | 21007 | 0.82241 | 0.82066 | 10.025  | 10.007  | -0.00021400 | -4,53E-02 |
| 210.106.015.625.000 | 0.95525 | 0.95554 | 10.000  | 10.003 | -1,47E-01 | -1,22E-03 | 21011 | 0.82155 | 0.82014 | 10.021  | 10.007  | -0.00023700 | -6,12E-02 |
| 210.143.750.000.000 | 0.95517 | 0.95542 | 10.001  | 10.003 | -2,93E-01 | -1,65E-02 | 21014 | 0.82065 | 0.81960 | 10.017  | 10.007  | -0.00025900 | -5,01E-02 |
| 210.180.332.031.250 | 0.95503 | 0.95531 | 10.000  | 10.003 | -2,70E-01 | 1,26E-02  | 21018 | 0.81962 | 0.81908 | 10.012  | 10.006  | -0.00027400 | -2,28E-02 |
| 210.216.914.062.500 | 0.95498 | 0.95520 | 10.001  | 10.003 | -2,00E-01 | 1,06E-02  | 21022 | 0.81865 | 0.81856 | 10.007  | 10.006  | -0.00027600 | -3,58E-03 |
| 210.253.496.093.750 | 0.95489 | 0.95509 | 10.001  | 10.003 | -1,92E-01 | -9,05E-03 | 21025 | 0.81760 | 0.81804 | 10.001  | 10.006  | -0.00027700 | 1,01E-02  |
| 210.291.289.062.500 | 0.95483 | 0.95498 | 10.002  | 10.003 | -2,68E-01 | -2,51E-02 | 21029 | 0.81659 | 0.81750 | 0.99963 | 10.005  | -0.00026800 | 9,16E-03  |
| 210.327.910.156.250 | 0.95469 | 0.95486 | 10.002  | 10.004 | -3,79E-01 | 1,22E-02  | 21033 | 0.81561 | 0.81698 | 0.99914 | 10.005  | -0.00027000 | 1,75E-02  |
| 210.365.722.656.250 | 0.95455 | 0.95475 | 10.002  | 10.004 | -1,77E-01 | 3,03E-02  | 21037 | 0.81458 | 0.81645 | 0.99862 | 10.005  | -0.00025500 | 5,55E-02  |
| 210.402.382.812.500 | 0.95455 | 0.95463 | 10.003  | 10.004 | -1,53E-01 | -1,05E-02 | 21040 | 0.81371 | 0.81593 | 0.99823 | 10.004  | -0.00022800 | 7,55E-02  |
| 210.440.214.843.750 | 0.95444 | 0.95452 | 10.003  | 10.004 | -2,55E-01 | -1,56E-02 | 21044 | 0.81288 | 0.81539 | 0.99790 | 10.004  | -0.00019900 | 8,17E-02  |
| 210.476.894.531.250 | 0.95436 | 0.95440 | 10.003  | 10.004 | -2,70E-01 | -1,42E-03 | 21048 | 0.81222 | 0.81488 | 0.99773 | 10.004  | -0.00016800 | 7,47E-02  |
| 210.514.765.625.000 | 0.95424 | 0.95429 | 10.003  | 10.004 | -2,65E-01 | 1,13E-02  | 21051 | 0.81163 | 0.81434 | 0.99764 | 10.003  | -0.00014300 | 6,82E-02  |
| 210.552.656.250.000 | 0.95416 | 0.95417 | 10.004  | 10.004 | -1,84E-01 | 1,20E-02  | 21055 | 0.81113 | 0.81381 | 0.99764 | 10.003  | -0.00011600 | 8,47E-02  |
| 210.590.546.875.000 | 0.95410 | 0.95405 | 10.004  | 10.004 | -1,74E-01 | 8,81E-03  | 21059 | 0.81076 | 0.81328 | 0.99776 | 10.003  | -7,93E-01   | 9,58E-02  |
| 210.627.265.625.000 | 0.95403 | 0.95394 | 10.005  | 10.004 | -1,18E-01 | 9,12E-03  | 21063 | 0.81054 | 0.81276 | 0.99803 | 10.002  | -4,43E-01   | 7,68E-02  |
| 210.665.195.312.500 | 0.95401 | 0.95382 | 10.006  | 10.004 | -1,06E-01 | -2,30E-02 | 21067 | 0.81042 | 0.81223 | 0.99840 | 10.002  | -2,20E-01   | 3,87E-02  |
| 210.703.144.531.250 | 0.95395 | 0.95370 | 10.006  | 10.004 | -2,93E-01 | -2,91E-02 | 21070 | 0.81038 | 0.81170 | 0.99885 | 10.002  | -1,50E-01   | 1,90E-02  |
| 210.741.093.750.000 | 0.95379 | 0.95358 | 10.006  | 10.004 | -3,27E-01 | 1,71E-02  | 21074 | 0.81031 | 0.81117 | 0.99928 | 10.001  | -7,52E-02   | 1,65E-02  |
| 210.779.062.500.000 | 0.95371 | 0.95346 | 10.006  | 10.004 | -1,63E-01 | 1,52E-02  | 21078 | 0.81032 | 0.81063 | 0.99978 | 10.001  | -2,41E-02   | 3,86E-04  |
| 210.817.031.250.000 | 0.95366 | 0.95334 | 10.007  | 10.004 | -2,11E-01 | -1,63E-02 | 21082 | 0.81029 | 0.81010 | 10.002  | 10.001  | -7,23E-02   | -4,19E-02 |
| 210.855.019.531.250 | 0.95355 | 0.95322 | 10.007  | 10.004 | -2,86E-01 | -2,19E-03 | 21086 | 0.81026 | 0.80957 | 10.007  | 10.000  | -3,43E-01   | -9,84E-02 |
| 210.893.027.343.750 | 0.95345 | 0.95310 | 10.007  | 10.004 | -2,28E-01 | -2,61E-03 | 21089 | 0.81003 | 0.80904 | 10.010  | 0.99997 | -8,20E-01   | -9,17E-02 |
| 210.932.246.093.750 | 0.95337 | 0.95297 | 10.008  | 10.004 | -3,06E-01 | -2,05E-02 | 21093 | 0.80963 | 0.80850 | 10.011  | 0.99993 | -0.00010500 | -6,20E-02 |
| 210.970.292.968.750 | 0.95321 | 0.95285 | 10.007  | 10.003 | -3,86E-01 | -5,20E-03 | 21097 | 0.80922 | 0.80797 | 10.011  | 0.99988 | -0.00013000 | -7,62E-02 |
| 211.008.339.843.750 | 0.95308 | 0.95273 | 10.007  | 10.003 | -3,46E-01 | 9,30E-03  | 21101 | 0.80864 | 0.80744 | 10.010  | 0.99984 | -0.00016300 | -7,57E-02 |
| 211.046.406.250.000 | 0.95295 | 0.95261 | 10.007  | 10.003 | -3,16E-01 | 2,36E-02  | 21105 | 0.80798 | 0.80691 | 10.009  | 0.99979 | -0.00018800 | -5,83E-02 |
| 211.085.664.062.500 | 0.95283 | 0.95248 | 10.007  | 10.003 | -1,64E-01 | 3,33E-02  | 21109 | 0.80719 | 0.80636 | 10.006  | 0.99975 | -0.00020800 | -2,45E-02 |

|                     |         |         |         |         |             |           |       |         |         |         |         |             |           |
|---------------------|---------|---------|---------|---------|-------------|-----------|-------|---------|---------|---------|---------|-------------|-----------|
| 211.123.750.000.000 | 0.95282 | 0.95236 | 10.008  | 10.003  | -5,83E-02   | -5,68E-03 | 21112 | 0.80637 | 0.80583 | 10.002  | 0.99970 | -0.00020600 | 3,53E-02  |
| 211.163.046.875.000 | 0.95279 | 0.95223 | 10.009  | 10.003  | -2,08E-01   | -2,75E-02 | 21116 | 0.80559 | 0.80529 | 0.99995 | 0.99965 | -0.00018100 | 6,46E-02  |
| 211.201.171.875.000 | 0.95266 | 0.95211 | 10.009  | 10.003  | -2,71E-01   | -1,43E-02 | 21120 | 0.80497 | 0.80476 | 0.99981 | 0.99960 | -0.00015600 | 5,21E-02  |
| 211.240.507.812.500 | 0.95258 | 0.95198 | 10.009  | 10.003  | -3,18E-01   | -4,02E-02 | 21124 | 0.80438 | 0.80421 | 0.99971 | 0.99955 | -0.00014000 | 3,48E-02  |
| 211.278.652.343.750 | 0.95241 | 0.95186 | 10.008  | 10.003  | -5,82E-01   | -3,26E-02 | 21128 | 0.80388 | 0.80369 | 0.99969 | 0.99949 | -0.00013000 | 9,93E-03  |
| 211.318.007.812.500 | 0.95212 | 0.95173 | 10.007  | 10.003  | -5,71E-01   | 1,39E-02  | 21132 | 0.80338 | 0.80314 | 0.99968 | 0.99944 | -0.00013300 | -1,84E-02 |
| 211.356.191.406.250 | 0.95197 | 0.95160 | 10.006  | 10.003  | -4,75E-01   | 1,91E-02  | 21136 | 0.80285 | 0.80261 | 0.99963 | 0.99938 | -0.00014400 | -6,37E-03 |
| 211.395.566.406.250 | 0.95176 | 0.95148 | 10.005  | 10.003  | -4,23E-01   | -1,23E-02 | 21140 | 0.80226 | 0.80207 | 0.99952 | 0.99933 | -0.00013800 | 1,90E-02  |
| 211.434.960.937.500 | 0.95164 | 0.95135 | 10.005  | 10.002  | -5,72E-01   | -3,46E-02 | 21143 | 0.80177 | 0.80152 | 0.99952 | 0.99927 | -0.00012900 | -7,95E-03 |
| 211.474.375.000.000 | 0.95131 | 0.95122 | 10.003  | 10.002  | -6,95E-01   | 1,26E-02  | 21147 | 0.80125 | 0.80098 | 0.99948 | 0.99921 | -0.00014400 | -2,02E-02 |
| 211.513.808.593.750 | 0.95109 | 0.95109 | 10.002  | 10.002  | -4,72E-01   | 4,50E-02  | 21151 | 0.80063 | 0.80043 | 0.99935 | 0.99915 | -0.00014500 | 2,60E-02  |
| 211.553.261.718.750 | 0.95093 | 0.95096 | 10.002  | 10.002  | -3,41E-01   | 2,00E-02  | 21155 | 0.80011 | 0.79988 | 0.99931 | 0.99908 | -0.00012300 | 2,49E-02  |
| 211.592.714.843.750 | 0.95082 | 0.95083 | 10.002  | 10.002  | -3,15E-01   | -7,16E-03 | 21159 | 0.79966 | 0.79934 | 0.99934 | 0.99902 | -0.00012500 | -5,33E-03 |
| 211.632.187.500.000 | 0.95069 | 0.95070 | 10.002  | 10.002  | -3,97E-01   | -2,18E-02 | 21163 | 0.79912 | 0.79879 | 0.99928 | 0.99895 | -0.00012800 | 7,31E-03  |
| 211.671.679.687.500 | 0.95051 | 0.95057 | 10.001  | 10.002  | -4,86E-01   | 6,75E-03  | 21167 | 0.79865 | 0.79824 | 0.99929 | 0.99889 | -0.00011900 | -2,92E-03 |
| 211.711.191.406.250 | 0.95030 | 0.95045 | 0.99999 | 10.001  | -3,44E-01   | 1,82E-02  | 21171 | 0.79817 | 0.79770 | 0.99929 | 0.99882 | -0.00013000 | -3,16E-02 |
| 211.750.703.125.000 | 0.95023 | 0.95032 | 10.000  | 10.001  | -3,42E-01   | -3,18E-02 | 21175 | 0.79762 | 0.79715 | 0.99922 | 0.99875 | -0.00014400 | -2,42E-02 |
| 211.790.234.375.000 | 0.95003 | 0.95019 | 0.99995 | 10.001  | -5,96E-01   | -1,10E-02 | 21179 | 0.79703 | 0.79660 | 0.99911 | 0.99867 | -0.00014900 | -6,11E-03 |
| 211.829.785.156.250 | 0.94976 | 0.95006 | 0.99979 | 10.001  | -4,29E-01   | 4,28E-02  | 21183 | 0.79645 | 0.79606 | 0.99899 | 0.99860 | -0.00014900 | -1,43E-02 |
| 211.869.355.468.750 | 0.94969 | 0.94993 | 0.99984 | 10.001  | -2,57E-01   | 1,05E-02  | 21187 | 0.79585 | 0.79551 | 0.99887 | 0.99853 | -0.00016000 | -4,18E-02 |
| 211.910.117.187.500 | 0.94956 | 0.94979 | 0.99982 | 10.001  | -3,45E-01   | -1,45E-02 | 21191 | 0.79516 | 0.79494 | 0.99866 | 0.99845 | -0.00018300 | -4,65E-02 |
| 211.949.726.562.500 | 0.94941 | 0.94966 | 0.99978 | 10.000  | -3,74E-01   | 1,05E-02  | 21195 | 0.79439 | 0.79439 | 0.99836 | 0.99837 | -0.00019800 | -2,97E-02 |
| 211.989.335.937.500 | 0.94926 | 0.94953 | 0.99974 | 10.000  | -2,62E-01   | 2,16E-02  | 21199 | 0.79359 | 0.79384 | 0.99803 | 0.99829 | -0.00020600 | -1,77E-02 |
| 212.030.156.250.000 | 0.94920 | 0.94940 | 0.99980 | 0.99999 | -2,00E-01   | -1,57E-02 | 21203 | 0.79273 | 0.79328 | 0.99765 | 0.99820 | -0.00021200 | 1,23E-02  |
| 212.069.785.156.250 | 0.94910 | 0.94927 | 0.99981 | 0.99997 | -3,89E-01   | -2,05E-02 | 21207 | 0.79189 | 0.79273 | 0.99728 | 0.99812 | -0.00019600 | 6,43E-02  |
| 212.110.644.531.250 | 0.94889 | 0.94913 | 0.99971 | 0.99995 | -3,65E-01   | 1,58E-02  | 21211 | 0.79115 | 0.79216 | 0.99702 | 0.99803 | -0.00016000 | 8,94E-02  |
| 212.151.523.437.500 | 0.94880 | 0.94900 | 0.99973 | 0.99993 | -2,59E-01   | 5,11E-02  | 21215 | 0.79058 | 0.79159 | 0.99692 | 0.99794 | -0.00012300 | 8,09E-02  |
| 212.191.210.937.500 | 0.94868 | 0.94887 | 0.99972 | 0.99991 | 4,67E-02    | 6,05E-02  | 21219 | 0.79015 | 0.79104 | 0.99696 | 0.99785 | -9,50E-01   | 3,70E-02  |
| 212.232.109.375.000 | 0.94884 | 0.94873 | 0.99999 | 0.99989 | 2,29E-01    | -3,42E-02 | 21223 | 0.78981 | 0.79047 | 0.99710 | 0.99776 | -9,35E-01   | -1,44E-02 |
| 212.271.835.937.500 | 0.94887 | 0.94860 | 10.001  | 0.99987 | -2,29E-01   | -1,58E-01 | 21227 | 0.78940 | 0.78992 | 0.99714 | 0.99766 | -0.00010700 | -2,29E-02 |
| 212.312.753.906.250 | 0.94865 | 0.94847 | 10.000  | 0.99985 | -0.00010500 | -1,53E-01 | 21231 | 0.78895 | 0.78935 | 0.99717 | 0.99756 | -0.00011200 | -1,46E-02 |
| 212.353.710.937.500 | 0.94801 | 0.94834 | 0.99949 | 0.99982 | -0.00014800 | -2,22E-02 | 21235 | 0.78848 | 0.78877 | 0.99717 | 0.99746 | -0.00011900 | -1,46E-03 |
| 212.394.687.500.000 | 0.94744 | 0.94820 | 0.99904 | 0.99980 | -0.00012300 | 1,07E-01  | 21239 | 0.78798 | 0.78820 | 0.99714 | 0.99736 | -0.00011300 | 1,65E-02  |
| 212.435.664.062.500 | 0.94700 | 0.94807 | 0.99871 | 0.99978 | -6,05E-01   | 1,47E-01  | 21244 | 0.78755 | 0.78763 | 0.99718 | 0.99725 | -0.00010500 | 1,03E-02  |
| 212.476.660.156.250 | 0.94694 | 0.94793 | 0.99876 | 0.99975 | -2,99E-02   | 1,07E-01  | 21248 | 0.78712 | 0.78705 | 0.99721 | 0.99715 | -0.00010500 | 2,48E-03  |

|                     |         |         |         |         |          |          |       |         |         |         |         |             |          |
|---------------------|---------|---------|---------|---------|----------|----------|-------|---------|---------|---------|---------|-------------|----------|
| 212.517.675.781.250 | 0.94697 | 0.94780 | 0.99890 | 0.99973 | 2,71E-01 | 6,89E-02 | 21252 | 0.78670 | 0.78648 | 0.99726 | 0.99704 | -0.00010300 | 3,23E-03 |
| 212.558.710.937.500 | 0.94716 | 0.94766 | 0.99920 | 0.99970 | 5,36E-01 | 4,09E-02 | 21256 | 0.78627 | 0.78590 | 0.99730 | 0.99693 | -0.00010200 | 2,51E-03 |
| 212.599.746.093.750 | 0.94741 | 0.94741 | 0.99956 | 0.99956 | 6,06E-01 | 1,72E-02 | 21260 | 0.78586 | 0.78533 | 0.99734 | 0.99681 | -0.00010100 | 2,63E-03 |
