# Supplementary material
Source: PubMed Central journal article supplement (PMC8325642)
Supplement: NIHMS1698257-supplement-Fig__4C_Insertase_pH8_k_space.pdf [file NIHMS1698257-supplement-Fig__4C_Insertase_pH8_k_space.pdf]

| k        | Insertase-pH8 | Fit         | Reidue     | Mo-Oxo      | Mo-O        | Mo-S       |
|----------|---------------|-------------|------------|-------------|-------------|------------|
| 0.0000   | 0.0000        | 0.0000      | 0.0000     | 0.0000      | 0.0000      | 0.0000     |
| 0.050000 | 7.4400e-05    | -2.3200e-05 | 9.7500e-05 | -2.2400e-05 | -1.7100e-06 | 9.3400e-07 |
| 0.10000  | 0.00057800    | -0.00018500 | 0.00076300 | -0.00017900 | -1.3500e-05 | 7.5200e-06 |
| 0.15000  | 0.0018900     | -0.00062200 | 0.0025200  | -0.00060300 | -4.4100e-05 | 2.5700e-05 |
| 0.20000  | 0.0043500     | -0.0014600  | 0.0058200  | -0.0014300  | -1.0000e-04 | 6.1900e-05 |
| 0.25000  | 0.0082400     | -0.0028400  | 0.011100   | -0.0027800  | -0.00018500 | 0.00012300 |
| 0.30000  | 0.013800      | -0.0048600  | 0.018600   | -0.0047800  | -0.00029700 | 0.00021800 |
| 0.35000  | 0.021200      | -0.0076400  | 0.028800   | -0.0075700  | -0.00043100 | 0.00035500 |
| 0.40000  | 0.030500      | -0.011300   | 0.041800   | -0.011200   | -0.00057300 | 0.00054400 |
| 0.45000  | 0.041900      | -0.015800   | 0.057700   | -0.015900   | -0.00070700 | 0.00079800 |
| 0.50000  | 0.055300      | -0.021400   | 0.076700   | -0.021700   | -0.00080500 | 0.0011300  |
| 0.55000  | 0.069700      | -0.028000   | 0.097700   | -0.028700   | -0.00083700 | 0.0015500  |
| 0.60000  | 0.085400      | -0.035600   | 0.12101    | -0.036900   | -0.00076100 | 0.0020700  |
| 0.65000  | 0.10196       | -0.044300   | 0.14621    | -0.046500   | -0.00048600 | 0.0027000  |
| 0.70000  | 0.11846       | -0.053800   | 0.17225    | -0.057300   | 5.1000e-05  | 0.0034300  |
| 0.75000  | 0.13380       | -0.064200   | 0.19803    | -0.069400   | 0.00089900  | 0.0043000  |
| 0.80000  | 0.14830       | -0.075500   | 0.22378    | -0.082900   | 0.0021300   | 0.0053100  |
| 0.85000  | 0.16135       | -0.087500   | 0.24880    | -0.097800   | 0.0038300   | 0.0064800  |
| 0.90000  | 0.16998       | -0.10000    | 0.26997    | -0.11389    | 0.0060800   | 0.0078200  |
| 0.95000  | 0.17452       | -0.11293    | 0.28745    | -0.13125    | 0.0089700   | 0.0093500  |
| 1.0000   | 0.17379       | -0.12505    | 0.29884    | -0.14893    | 0.012800    | 0.011000   |
| 1.0500   | 0.16633       | -0.13682    | 0.30315    | -0.16734    | 0.017600    | 0.012900   |
| 1.1000   | 0.15306       | -0.14794    | 0.30100    | -0.18629    | 0.023300    | 0.015100   |
| 1.1500   | 0.13754       | -0.15808    | 0.29562    | -0.20556    | 0.030100    | 0.017400   |
| 1.2000   | 0.10917       | -0.16689    | 0.27606    | -0.22489    | 0.038000    | 0.020000   |
| 1.2500   | 0.070200      | -0.17261    | 0.24282    | -0.24313    | 0.047300    | 0.023300   |
| 1.3000   | 0.025500      | -0.17432    | 0.19984    | -0.25959    | 0.058000    | 0.027300   |
| 1.3500   | -0.03400      | -0.17280    | 0.12942    | -0.27465    | 0.070100    | 0.031800   |
| 1.4000   | -0.085100     | -0.16757    | 0.082400   | -0.28786    | 0.083400    | 0.036900   |
| 1.4500   | -0.15641      | -0.15816    | 0.0017500  | -0.29878    | 0.098100    | 0.042500   |
| 1.5000   | -0.24249      | -0.14132    | -0.10117   | -0.30553    | 0.11426     | 0.050000   |
| 1.5500   | -0.32246      | -0.11531    | -0.20715   | -0.30691    | 0.13167     | 0.059900   |
| 1.6000   | -0.40695      | -0.082600   | -0.32434   | -0.30388    | 0.15009     | 0.071200   |
| 1.6500   | -0.47949      | -0.042800   | -0.43671   | -0.29591    | 0.16935     | 0.083800   |
| 1.7000   | -0.54366      | 0.0045500   | -0.54822   | -0.28247    | 0.18926     | 0.097800   |
| 1.7500   | -0.60773      | 0.065700    | -0.67339   | -0.25984    | 0.20951     | 0.11598    |
| 1.8000   | -0.67291      | 0.13802     | -0.81893   | -0.22881    | 0.22965     | 0.13718    |
| 1.8500   | -0.70860      | 0.21911     | -0.92771   | -0.19026    | 0.24934     | 0.16003    |
| 1.9000   | -0.74564      | 0.30871     | -1.0544    | -0.14381    | 0.26823     | 0.18429    |
| 1.9500   | -0.73133      | 0.40721     | -1.1385    | -0.088500   | 0.28583     | 0.20989    |
| 2.0000   | -0.72665      | 0.51913     | -1.2458    | -0.019500   | 0.30080     | 0.23780    |
| 2.0500   | -0.66853      | 0.63662     | -1.3051    | 0.058500    | 0.31326     | 0.26486    |
| 2.1000   | -0.58526      | 0.75814     | -1.3434    | 0.14530     | 0.32275     | 0.29008    |
| 2.1500   | -0.48975      | 0.88195     | -1.3717    | 0.24078     | 0.32883     | 0.31234    |
| 2.2000   | -0.40681      | 1.0067      | -1.4135    | 0.34841     | 0.32972     | 0.32860    |
| 2.2500   | -0.31160      | 1.1277      | -1.4593    | 0.46595     | 0.33651     | 0.33665    |
| 2.3000   | -0.18777      | 1.2414      | -1.4291    | 0.59040     | 0.31556     | 0.33561    |
| 2.3500   | -0.091000     | 1.3449      | -1.4359    | 0.72080     | 0.30010     | 0.32397    |
| 2.4000   | 0.0078700     | 1.4338      | -1.4260    | 0.85724     | 0.27838     | 0.29821    |
| 2.4500   | 0.17959       | 1.5001      | -1.3205    | 1.0004      | 0.24817     | 0.25158    |
| 2.5000   | 0.29733       | 1.5455      | -1.2482    | 1.1445      | 0.21168     | 0.18932    |
| 2.5500   | 0.36437       | 1.5681      | -1.2038    | 1.2878      | 0.16905     | 0.11130    |
| 2.6000   | 0.43720       | 1.5668      | -1.1296    | 1.4283      | 0.12056     | 0.017900   |
| 2.6500   | 0.64142       | 1.5220      | -0.88061   | 1.5612      | 0.059500    | -0.098700  |
| 2.7000   | 0.78907       | 1.4506      | -0.66151   | 1.6825      | -0.0064000  | -0.22549   |
| 2.7500   | 0.88478       | 1.3570      | -0.47222   | 1.7895      | -0.075300   | -0.35723   |
| 2.8000   | 0.99524       | 1.2450      | -0.24975   | 1.8799      | -0.14581    | -0.48908   |
| 2.8500   | 1.1325        | 1.1382      | -0.0057400 | 1.9678      | -0.21467    | -0.61484   |
| 2.9000   | 1.1207        | 1.0270      | 0.093700   | 2.0414      | -0.28237    | -0.73210   |
| 2.9500   | 1.2113        | 0.90342     | 0.30789    | 2.0874      | -0.34821    | -0.83576   |
| 3.0000   | 1.2302        | 0.77266     | 0.45758    | 2.1023      | -0.41002    | -0.91961   |
| 3.0500   | 1.2329        | 0.63717     | 0.59569    | 2.0904      | -0.46848    | -0.98475   |
| 3.1000   | 1.1973        | 0.49821     | 0.69906    | 2.0589      | -0.52544    | -1.0352    |
| 3.1500   | 0.98856       | 0.36274     | 0.62582    | 1.9983      | -0.57604    | -1.0595    |
| 3.2000   | 0.92198       | 0.23417     | 0.68782    | 1.9082      | -0.61895    | -1.0551    |
| 3.2500   | 0.89339       | 0.11428     | 0.77911    | 1.7874      | -0.65342    | -1.0197    |
| 3.3000   | 0.72866       | 0.0016100   | 0.72705    | 1.6325      | -0.67979    | -0.95109   |
| 3.3500   | 0.50414       | -0.097500   | 0.60166    | 1.4489      | -0.69532    | -0.85109   |
| 3.4000   | 0.23255       | -0.18228    | 0.41483    | 1.2381      | -0.69935    | -0.72108   |
| 3.4500   | 0.25862       | -0.25260    | 0.51122    | 1.0022      | -0.69140    | -0.56344   |
| 3.5000   | -0.080900     | -0.31418    | 0.23324    | 0.73481     | -0.66993    | -0.37965   |
| 3.5500   | -0.13075      | -0.36539    | 0.23264    | 0.48483     | -0.63464    | -0.17703   |
| 3.6000   | -0.33263      | -0.40212    | 0.069500   | 0.14632     | -0.58768    | 0.039200   |
| 3.6500   | -0.47646      | -0.43283    | -0.043600  | -0.16710    | -0.52905    | 0.26332    |
| 3.7000   | -0.46190      | -0.46475    | 0.0028500  | -0.49516    | -0.45793    | 0.48834    |
| 3.7500   | -0.50946      | -0.49629    | -0.013200  | -0.82741    | -0.37625    | 0.70738    |
| 3.8000   | -0.44130      | -0.52927    | 0.088000   | -1.1574     | -0.28571    | 0.91386    |
| 3.8500   | -0.58846      | -0.56667    | -0.021800  | -1.4800     | -0.18795    | 1.1013     |
| 3.9000   | -0.56906      | -0.60878    | 0.039700   | -1.7892     | -0.083900   | 1.2643     |
| 3.9500   | -0.52646      | -0.65945    | 0.13299    | -2.0789     | 0.023700    | 1.3958     |
| 4.0000   | -0.51180      | -0.72191    | 0.20311    | -2.3444     | 0.13214     | 1.4904     |
| 4.0500   | -0.64921      | -0.79764    | 0.14842    | -2.5810     | 0.23924     | 1.5441     |
| 4.1000   | -0.53019      | -0.89050    | 0.36031    | -2.7881     | 0.34363     | 1.5540     |
| 4.1500   | -0.67334      | -1.0011     | 0.32779    | -2.9612     | 0.44309     | 1.5170     |
| 4.2000   | -0.92141      | -1.1262     | 0.20476    | -3.0938     | 0.53480     | 1.4329     |

|        |          |           |             |           |           |           |
|--------|----------|-----------|-------------|-----------|-----------|-----------|
| 4.2500 | -0.71733 | -1.2633   | 0.54595     | -3.1831   | 0.61672   | 1.3031    |
| 4.3000 | -0.88164 | -1.4093   | 0.52765     | -3.2259   | 0.68729   | 1.1194    |
| 4.3500 | -0.95518 | -1.5609   | 0.60479     | -3.2195   | 0.71458   | 0.91492   |
| 4.4000 | -1.2170  | -1.7098   | 0.49277     | -3.1635   | 0.78669   | 0.66708   |
| 4.4500 | -1.2519  | -1.8526   | 0.60068     | -3.0584   | 0.81261   | 0.39317   |
| 4.5000 | -1.2937  | -1.9840   | 0.69032     | -2.9067   | 0.82214   | 0.10051   |
| 4.5500 | -1.5037  | -2.0992   | 0.59549     | -2.7115   | 0.81533   | -0.20304  |
| 4.6000 | -1.7234  | -2.1865   | 0.46314     | -2.4723   | 0.79135   | -0.50557  |
| 4.6500 | -1.6942  | -2.2388   | 0.54452     | -2.1925   | 0.75070   | -0.79698  |
| 4.7000 | -1.8437  | -2.2513   | 0.40761     | -1.8774   | 0.69449   | -1.0684   |
| 4.7500 | -1.7928  | -2.2218   | 0.42905     | -1.5334   | 0.62436   | -1.3128   |
| 4.8000 | -2.1158  | -2.1391   | 0.023300    | -1.1626   | 0.54104   | -1.5175   |
| 4.8500 | -1.2098  | -1.9996   | 0.78983     | -0.77103  | 0.44643   | -1.6750   |
| 4.9000 | -1.6522  | -1.8017   | 0.14947     | -0.36507  | 0.34280   | -1.7794   |
| 4.9500 | -1.1914  | -1.5460   | 0.35463     | 0.048800  | 0.23287   | -1.8278   |
| 5.0000 | -0.59248 | -1.2325   | 0.63998     | 0.46528   | 0.11831   | -1.8161   |
| 5.0500 | -0.86472 | -0.86484  | 0.00012600  | 0.87728   | 0.0017200 | -1.7438   |
| 5.1000 | -0.55509 | -0.44916  | -0.10593    | 1.2780    | -0.11428  | -1.6129   |
| 5.1500 | 0.19223  | 0.0087700 | 0.18346     | 1.6641    | -0.22789  | -1.4275   |
| 5.2000 | 0.28272  | 0.50077   | -0.21805    | 2.0275    | -0.34618  | -1.1905   |
| 5.2500 | 0.78749  | 1.0155    | -0.22801    | 2.3517    | -0.3671   | -0.90952  |
| 5.3000 | 1.5429   | 1.5402    | 0.0027000   | 2.6612    | -0.52721  | -0.59376  |
| 5.3500 | 1.9230   | 2.0646    | -0.14164    | 2.9241    | -0.60649  | -0.25294  |
| 5.4000 | 2.5070   | 2.5725    | -0.065500   | 3.1437    | -0.67233  | 0.10106   |
| 5.4500 | 3.1949   | 3.0488    | 0.14611     | 3.3162    | -0.72330  | 0.45587   |
| 5.5000 | 3.4553   | 3.4791    | -0.023800   | 3.4385    | -0.75834  | 0.79896   |
| 5.5500 | 4.0410   | 3.8599    | 0.18108     | 3.5152    | -0.77836  | 1.1231    |
| 5.6000 | 3.7202   | 4.1696    | -0.44942    | 3.5389    | -0.78166  | 1.4123    |
| 5.6500 | 4.0065   | 4.3955    | -0.38894    | 3.5083    | -0.76813  | 1.6553    |
| 5.7000 | 4.2341   | 4.5280    | -0.29392    | 3.4235    | -0.73822  | 1.8428    |
| 5.7500 | 4.6687   | 4.5680    | 0.10074     | 3.2912    | -0.69386  | 1.9706    |
| 5.8000 | 4.6890   | 4.5042    | 0.18481     | 3.1092    | -0.63523  | 2.0302    |
| 5.8500 | 3.9605   | 4.3333    | -0.37277    | 2.8790    | -0.56357  | 2.0178    |
| 5.9000 | 2.8898   | 4.0568    | -1.1670     | 2.6046    | -0.48066  | 1.9329    |
| 5.9500 | 3.6456   | 3.6870    | -0.041400   | 2.2987    | -0.39003  | 1.7783    |
| 6.0000 | 2.7968   | 3.2247    | -0.42787    | 1.9585    | -0.29218  | 1.5583    |
| 6.0500 | 2.2244   | 2.6780    | -0.45357    | 1.5867    | -0.18888  | 1.2801    |
| 6.1000 | 1.8050   | 1.8051    | -0.26705    | 1.1892    | -0.082500 | 0.95339   |
| 6.1500 | 0.85137  | 1.3864    | -0.53499    | 0.77210   | 0.024600  | 0.58965   |
| 6.2000 | 0.45052  | 0.67414   | -0.22362    | 0.34223   | 0.12994   | 0.20197   |
| 6.2500 | 0.28737  | -0.057900 | 0.34530     | -0.093500 | 0.23116   | -0.19560  |
| 6.3000 | -1.0533  | -0.79049  | -0.26283    | -0.52800  | 0.32604   | -0.58853  |
| 6.3500 | -2.1712  | -1.5041   | -0.66713    | -0.95423  | 0.41251   | -0.96236  |
| 6.4000 | -2.7344  | -2.1798   | -0.55462    | -1.3652   | 0.48874   | -1.3033   |
| 6.4500 | -3.0742  | -2.8097   | -0.26444    | -1.7634   | 0.55551   | -1.6019   |
| 6.5000 | -3.7225  | -3.3737   | -0.34884    | -2.1407   | 0.61068   | -1.8437   |
| 6.5500 | -4.8618  | -3.8516   | -2.4861     | -2.4861   | 0.65182   | -2.0173   |
| 6.6000 | -4.8218  | -4.2316   | -0.59016    | -2.7939   | 0.67813   | -2.1158   |
| 6.6500 | -5.3704  | -4.5052   | -0.86520    | -3.0588   | 0.68915   | -2.1355   |
| 6.7000 | -5.9671  | -4.6671   | -1.3000     | -3.2764   | 0.68483   | -2.0755   |
| 6.7500 | -5.0250  | -4.7157   | -0.30926    | -3.4428   | 0.66545   | -1.9383   |
| 6.8000 | -5.3313  | -4.6529   | -0.67841    | -3.5554   | 0.63167   | -1.7292   |
| 6.8500 | -4.4841  | -4.4840   | -7.9400e-05 | -3.6122   | 0.58450   | -1.4562   |
| 6.9000 | -3.7276  | -4.2172   | 0.48967     | -3.6124   | 0.52523   | -1.1301   |
| 6.9500 | -3.4297  | -3.8654   | 0.43572     | -3.5615   | 0.45551   | -0.75944  |
| 7.0000 | -3.7423  | -3.4402   | -0.30210    | -3.4577   | 0.37643   | -0.35890  |
| 7.0500 | -2.2827  | -2.9553   | 0.67258     | -3.2971   | 0.28974   | 0.052100  |
| 7.1000 | -3.1809  | -2.4275   | -0.75338    | -3.0823   | 0.19762   | 0.45710   |
| 7.1500 | -2.8410  | -1.8742   | -0.96681    | -2.8168   | 0.10235   | 0.84029   |
| 7.2000 | -1.5106  | -1.3123   | -0.19831    | -2.5053   | 0.0062600 | 1.1867    |
| 7.2500 | -0.91548 | -0.75826  | -0.15721    | -2.1530   | -0.088300 | 1.4831    |
| 7.3000 | -0.58758 | -0.22699  | -0.36058    | -1.7661   | -0.17919  | 1.7183    |
| 7.3500 | -0.50169 | 0.26840   | -0.77009    | -1.3513   | -0.26419  | 1.8839    |
| 7.4000 | 1.4787   | 0.71706   | 0.76163     | -0.91578  | -0.34139  | 1.9742    |
| 7.4500 | 0.94949  | 1.2156    | -0.16511    | -0.46152  | -0.41038  | 1.9875    |
| 7.5000 | 1.8315   | 1.4607    | 0.37078     | 0.0077800 | -0.47001  | 1.9230    |
| 7.5500 | 2.1861   | 1.7425    | 0.44354     | 0.47660   | -0.51716  | 1.7831    |
| 7.6000 | 2.0116   | 1.9604    | 0.051200    | 0.93641   | -0.55083  | 1.5748    |
| 7.6500 | 1.8158   | 2.1162    | -0.30042    | 1.3789    | -0.57043  | 1.3078    |
| 7.7000 | 2.3054   | 2.2142    | 0.091200    | 1.7959    | -0.57572  | 0.99399   |
| 7.7500 | 2.6794   | 2.2604    | 0.41901     | 2.1801    | -0.56685  | 0.64716   |
| 7.8000 | 2.8448   | 2.2623    | 0.58258     | 2.5245    | -0.54434  | 0.28211   |
| 7.8500 | 2.7379   | 2.2281    | 0.59983     | 2.8230    | -0.59904  | -0.085900 |
| 7.9000 | 3.2291   | 2.1666    | 1.0626      | 3.0703    | -0.46214  | -0.44164  |
| 7.9500 | 2.0596   | 2.0881    | -0.028500   | 3.2664    | -0.40496  | -0.77332  |
| 8.0000 | 2.3574   | 2.0006    | 0.35682     | 3.4106    | -0.33859  | -1.0714   |
| 8.0500 | 3.0847   | 1.9066    | 1.1781      | 3.4917    | -0.26502  | -1.3201   |
| 8.1000 | 3.1974   | 1.8121    | 1.3853      | 3.5084    | -0.18633  | -1.5100   |
| 8.1500 | 1.2420   | 1.7216    | -0.47963    | 3.4606    | -0.10473  | -1.6343   |
| 8.2000 | 1.9893   | 1.6380    | 0.35135     | 3.3496    | -0.022400 | -1.6892   |
| 8.2500 | 2.7028   | 1.5623    | 1.1405      | 3.1778    | 0.058400  | -1.6739   |
| 8.3000 | 2.0370   | 1.4938    | 0.54319     | 2.9490    | 0.13558   | -1.5907   |
| 8.3500 | 0.49380  | 1.4304    | -0.93664    | 2.6680    | 0.20723   | -1.4447   |
| 8.4000 | 2.1569   | 1.3685    | 0.78842     | 2.3405    | 0.27159   | -1.2436   |
| 8.4500 | 2.0642   | 1.3027    | 0.76150     | 1.9728    | 0.32753   | -0.99758  |
| 8.5000 | 1.6351   | 1.2271    | 0.40791     | 1.5695    | 0.37458   | -0.71695  |

|        |          |          |            |            |           |           |
|--------|----------|----------|------------|------------|-----------|-----------|
| 8.5500 | 1.6247   | 1.1387   | 0.48599    | 1.1393     | 0.41054   | -0.41105  |
| 8.6000 | 2.0222   | 1.0320   | 0.99023    | 0.69066    | 0.43472   | -0.093400 |
| 8.6500 | 2.7992   | 0.90184  | 1.8973     | 0.23269    | 1.8973    | 0.22238   |
| 8.7000 | 0.99024  | 0.74393  | 0.24632    | -0.22554   | 0.44670   | 0.52277   |
| 8.7500 | 1.7980   | 0.55514  | 1.2429     | -0.67500   | 0.43485   | 0.79530   |
| 8.8000 | -0.11784 | 0.33389  | -0.45173   | -1.1069    | 0.41188   | 1.0289    |
| 8.8500 | 0.49244  | 0.080300 | 0.41211    | -1.5128    | 0.37875   | 1.2144    |
| 8.9000 | -0.21116 | -0.20346 | -0.0077000 | -1.8851    | 0.33667   | 1.3450    |
| 8.9500 | -0.79068 | -0.51413 | -0.27656   | -2.2188    | 0.28716   | 1.4176    |
| 9.0000 | 0.032000 | -0.84992 | 0.88195    | -2.5162    | 0.23179   | 1.4345    |
| 9.0500 | -1.6815  | -1.2012  | -0.48028   | -2.7625    | 0.17173   | 1.3895    |
| 9.1000 | -0.68484 | -1.5588  | 0.87401    | -2.9530    | 0.10877   | 1.2854    |
| 9.1500 | -2.4369  | -1.9121  | -0.52478   | -3.0844    | 0.044700  | 1.1276    |
| 9.2000 | -1.2344  | -2.2493  | 1.0149     | -3.1545    | -0.018600 | 0.92379   |
| 9.2500 | -0.70044 | -2.5584  | 1.8579     | -3.1626    | -0.079500 | 0.68368   |
| 9.3000 | -2.5539  | -2.8270  | 0.27305    | -3.1090    | -0.13626  | 0.41828   |
| 9.3500 | -3.7688  | -3.0434  | -0.72548   | -2.9954    | -0.18754  | 0.19960   |
| 9.4000 | -3.9253  | -3.1969  | -0.72842   | -2.8249    | -0.23206  | -0.13999  |
| 9.4500 | -3.9924  | -3.2797  | -0.71273   | -2.6022    | -0.26894  | -0.40851  |
| 9.5000 | -3.7696  | -3.2914  | -0.47817   | -2.3368    | -0.29837  | -0.65625  |
| 9.5500 | -3.8678  | -3.2171  | -0.65074   | -2.0271    | -0.31880  | -0.87158  |
| 9.6000 | -3.0954  | -3.0540  | -0.041400  | -1.6797    | -0.32993  | -1.0444   |
| 9.6500 | -3.7612  | -2.8028  | -0.95839   | -1.3020    | -0.33172  | -1.1691   |
| 9.7000 | -3.4799  | -2.4668  | -1.0131    | -0.90183   | -0.32440  | -1.2406   |
| 9.7500 | -2.5336  | -2.0527  | -0.48089   | -0.48757   | -0.30845  | -1.2567   |
| 9.8000 | -1.3960  | -1.5703  | 0.17424    | -0.067800  | -0.28458  | -1.2179   |
| 9.8500 | 0.14821  | -1.0316  | 1.1799     | 0.34903    | -0.25373  | -1.1269   |
| 9.9000 | 0.030800 | -0.45148 | 0.48229    | 0.75433    | -0.21698  | -0.98884  |
| 9.9500 | -2.1588  | 0.15456  | -2.3154    | 1.1407     | -0.17558  | -0.81057  |
| 10.00  | 1.0386   | 0.78125  | 0.25740    | 1.5119     | -0.13089  | -0.59981  |
| 10.050 | 1.9176   | 1.3999   | 0.51764    | 1.8515     | -0.083700 | -0.36789  |
| 10.100 | 1.3282   | 1.9915   | -0.66330   | 2.1525     | -0.035400 | -0.12559  |
| 10.150 | 0.63168  | 2.5375   | -1.9058    | 2.4089     | 0.012500  | 0.11610   |
| 10.200 | 3.6664   | 3.0207   | 0.64571    | 2.6154     | 0.058800  | 0.34649   |
| 10.250 | 2.1038   | 3.4259   | -1.3221    | 2.7680     | 0.10219   | 0.55566   |
| 10.300 | 4.3285   | 3.7402   | 0.58829    | 2.8638     | 0.14147   | 0.73492   |
| 10.350 | 3.3205   | 3.9538   | -0.63328   | 2.9010     | 0.17565   | 0.87713   |
| 10.400 | 2.0232   | 4.0601   | -2.0369    | 2.8792     | 0.20793   | 0.97699   |
| 10.450 | 2.3533   | 4.0560   | -1.7027    | 2.7991     | 0.22566   | 1.0313    |
| 10.500 | 4.8567   | 3.9419   | 0.91476    | 2.6627     | 0.24042   | 1.0389    |
| 10.550 | 3.2201   | 3.7219   | -0.50183   | 2.4731     | 0.24801   | 1.0008    |
| 10.600 | 1.2198   | 3.4032   | -2.1834    | 2.2347     | 0.24842   | 0.92007   |
| 10.650 | 4.5368   | 2.9962   | 1.5406     | 1.9527     | 0.24188   | 0.80161   |
| 10.700 | 1.9971   | 2.5138   | -0.51667   | 1.6332     | 0.22879   | 0.65180   |
| 10.750 | 0.56654  | 1.9711   | -1.4046    | 1.2831     | 0.20973   | 0.47828   |
| 10.800 | 3.3592   | 1.3850   | 1.9742     | 0.91002    | 0.18544   | 0.28950   |
| 10.850 | 0.49664  | 0.72285  | 0.52321    | 0.52719    | 0.15679   | 0.094300  |
| 10.900 | 0.16358  | 0.15285  | 0.010700   | 0.12647    | 0.12474   | -0.098400 |
| 10.950 | -1.8770  | -0.45728 | -1.4197    | -0.26752   | 0.090300  | -0.28009  |
| 11.000 | -1.3581  | -1.0535  | -0.30461   | -0.66130   | 0.054200  | -0.44638  |
| 11.050 | -2.4003  | -1.6104  | -0.78983   | -1.0402    | 0.017600  | -0.58781  |
| 11.100 | -3.6905  | -2.1130  | -1.5775    | -1.3959    | -0.018500 | -0.69861  |
| 11.150 | -1.0868  | -2.5486  | 1.4617     | -1.7209    | -0.052900 | -0.77468  |
| 11.200 | -2.6369  | -2.9069  | 0.26998    | -2.0084    | -0.084800 | -0.81365  |
| 11.250 | -5.5919  | -3.1806  | -2.4112    | -2.2524    | -0.11328  | -0.81491  |
| 11.300 | -4.6499  | -3.3651  | -1.2848    | -2.4479    | -0.13759  | -0.77961  |
| 11.350 | -3.8098  | -3.4586  | -0.35117   | -2.5910    | -0.15716  | -0.71052  |
| 11.400 | -1.7495  | -3.4622  | 1.7127     | -2.6787    | -0.17156  | -0.61190  |
| 11.450 | -1.9806  | -3.3795  | 1.3989     | -2.7097    | -0.18054  | -0.48921  |
| 11.500 | -4.6009  | -3.2163  | -1.3845    | -2.6835    | -0.18401  | -0.34882  |
| 11.550 | -0.71953 | -2.9808  | 2.2613     | -2.6010    | -0.18205  | -0.19773  |
| 11.600 | -1.7020  | -2.6824  | 0.98044    | -2.4644    | -0.17489  | -0.043100 |
| 11.650 | -4.4490  | -2.3320  | -2.1170    | -2.2769    | -0.16292  | 0.10777   |
| 11.700 | -2.4106  | -1.9411  | -0.46956   | -2.0428    | -0.14665  | 0.24831   |
| 11.750 | -0.81630 | -1.5217  | 1.0054     | -1.7674    | -0.12674  | 0.37247   |
| 11.800 | -3.1416  | -1.0856  | -2.0560    | -1.4570    | -0.10379  | 0.47522   |
| 11.850 | -1.3008  | -0.64449 | -0.65632   | -1.1185    | -0.078700 | 0.55270   |
| 11.900 | 0.66291  | -0.20911 | 0.87202    | -0.75924   | -0.052200 | 0.60236   |
| 11.950 | 2.5746   | 0.21070  | 2.3639     | -0.38712   | -0.025200 | 0.62304   |
| 12.000 | 1.8317   | 0.61530  | 1.2164     | -0.0046300 | 0.0018800 | 0.61805   |
| 12.050 | -1.0643  | 0.98834  | -2.0526    | 0.37578    | 0.028000  | 0.58454   |
| 12.100 | 2.3001   | 1.3219   | 0.97818    | 0.74509    | 0.052400  | 0.52444   |
| 12.150 | 1.7966   | 1.6109   | 0.85669    | 1.0952     | 0.074300  | 0.44430   |
| 12.200 | 3.0291   | 1.8518   | 1.1773     | 1.4186     | 0.093200  | 0.34001   |
| 12.250 | 2.3276   | 2.0427   | 0.28486    | 1.7084     | 0.10859   | 0.22567   |
| 12.300 | 3.4846   | 2.1829   | 1.3016     | 1.9585     | 0.12020   | 0.10420   |
| 12.350 | 2.8635   | 2.2731   | 0.59041    | 2.1638     | 0.12778   | -0.018400 |
| 12.400 | 3.7059   | 2.3150   | 1.3909     | 2.3200     | 0.13125   | -0.13630  |
| 12.450 | 5.7350   | 2.3110   | 3.4240     | 2.4243     | 0.13068   | -0.24400  |
| 12.500 | 1.6507   | 2.2644   | -0.61364   | 2.4748     | 0.12624   | -0.33672  |
| 12.550 | 4.6686   | 2.1787   | 2.4898     | 2.4711     | 0.11820   | -0.41054  |
| 12.600 | 2.0697   | 2.0581   | 0.011800   | 2.4137     | 0.10696   | -0.46257  |
| 12.650 | 1.3939   | 1.9064   | -0.51246   | 2.3044     | 0.093000  | -0.49105  |
| 12.700 | 2.5201   | 1.7277   | 0.79232    | 2.1463     | 0.076800  | -0.49540  |
| 12.750 | 2.7832   | 1.5262   | 1.2570     | 1.9435     | 0.059000  | -0.47624  |
| 12.800 | 2.9708   | 1.3057   | 1.6652     | 1.7008     | 0.040200  | -0.43529  |

|        |          |            |             |           |            |            |
|--------|----------|------------|-------------|-----------|------------|------------|
| 12.850 | 1.2460   | 1.0698     | 0.17613     | 1.4241    | 0.020900   | -0.37522   |
| 12.900 | 0.46896  | 0.82233    | -0.35337    | 1.1200    | 0.0019000  | -0.29958   |
| 12.950 | 1.7768   | 0.56663    | 1.2592      | 0.79551   | -0.216400  | -0.21250   |
| 13.000 | 2.3691   | 0.30308    | 1.0660      | 0.45544   | -0.033600  | -0.11880   |
| 13.050 | -2.0638  | 0.036500   | -2.1003     | 0.10843   | -0.049000  | -0.022900  |
| 13.100 | -1.2218  | -0.22899   | -0.99276    | -0.23716  | -0.062400  | 0.070600   |
| 13.150 | -1.7114  | -0.48950   | -1.2219     | -0.57355  | -0.073300  | 0.15735    |
| 13.200 | -0.95458 | -0.74122   | -0.21336    | -0.89329  | -0.081500  | 0.23357    |
| 13.250 | -2.0119  | -0.98024   | -1.0316     | -1.1894   | -0.086900  | 0.29600    |
| 13.300 | -3.5119  | -1.2026    | -2.3094     | -1.4554   | -0.089400  | 0.34222    |
| 13.350 | -2.4876  | -1.4042    | -1.0834     | -1.6857   | -0.089900  | 0.37063    |
| 13.400 | -3.3539  | -1.5811    | -1.7727     | -1.8757   | -0.086000  | 0.38058    |
| 13.450 | -0.95111 | -1.7296    | 0.77853     | -2.0214   | -0.080500  | 0.37229    |
| 13.500 | -0.92186 | -1.8462    | 0.92435     | -2.1203   | -0.072800  | 0.34688    |
| 13.550 | 3.9505   | -1.9277    | 5.8781      | -2.1707   | -0.063200  | 0.30619    |
| 13.600 | -3.9844  | -1.9714    | -2.0129     | -2.1721   | -0.052100  | 0.25277    |
| 13.650 | -4.3184  | -1.9755    | -2.3429     | -2.1252   | -0.039900  | 0.18965    |
| 13.700 | 5.9876   | -1.9387    | 7.9263      | -2.0318   | -0.027100  | 0.12020    |
| 13.750 | -3.1370  | -1.8607    | -1.2763     | -1.8946   | -0.014100  | 0.048000   |
| 13.800 | -2.2703  | -1.7420    | -0.52825    | -1.7173   | -0.0012000 | -0.023500  |
| 13.850 | -1.0885  | -1.5845    | 0.49592     | -1.5046   | 0.011100   | -0.090900  |
| 13.900 | -2.8407  | -1.3906    | -1.4500     | -1.2619   | 0.022400   | -0.15119   |
| 13.950 | -1.3414  | -1.1643    | -0.17711    | -0.99502  | 0.032600   | -0.20180   |
| 14.000 | -3.3797  | -0.90795   | -2.4718     | -0.70814  | 0.041400   | -0.24123   |
| 14.050 | -1.6895  | -0.62659   | -1.0629     | -0.40744  | 0.048600   | -0.26779   |
| 14.100 | -2.2780  | -0.32707   | -1.9510     | -0.10049  | 0.054000   | -0.28061   |
| 14.150 | -3.8515  | -0.016700  | -3.8349     | 0.20548   | 0.057500   | -0.27962   |
| 14.200 | -5.5580  | 0.29692    | -5.8549     | 0.50336   | 0.059000   | -0.26543   |
| 14.250 | -0.51836 | 0.60561    | -1.1240     | 0.78630   | 0.058600   | -0.23926   |
| 14.300 | -7.8952  | 0.90135    | -8.7975     | 1.0749    | 0.056300   | -0.20286   |
| 14.350 | -2.0584  | 1.1763     | -3.2347     | 1.2823    | 0.052400   | -0.15840   |
| 14.400 | 1.0495   | 1.4230     | -0.37347    | 1.4843    | 0.047100   | -0.10833   |
| 14.450 | -1.4043  | 1.6348     | -3.0391     | 1.6496    | 0.040500   | -0.055300  |
| 14.500 | 5.1750   | 1.8058     | 3.3692      | 1.7749    | 0.032900   | -0.0019300 |
| 14.550 | 5.8346   | 1.9314     | 3.9032      | 1.8576    | 0.024600   | 0.049200   |
| 14.600 | 5.6173   | 2.0081     | 3.6092      | 1.8964    | 0.016000   | 0.095700   |
| 14.650 | 4.7262   | 2.0339     | 2.6923      | 1.8910    | 0.0072500  | 0.13563    |
| 14.700 | -1.2685  | 2.0081     | -3.2706     | 1.8421    | -0.0013000 | 0.16734    |
| 14.750 | 6.2717   | 1.9316     | 4.3421      | 1.7513    | -0.0094100 | 0.18968    |
| 14.800 | -0.13997 | 1.8066     | -1.9465     | 1.6214    | -0.016800  | 0.20202    |
| 14.850 | 6.1028   | 1.6367     | 4.4660      | 1.4559    | -0.023400  | 0.20422    |
| 14.900 | 1.9965   | 1.4270     | 0.56951     | 1.2592    | -0.028800  | 0.19664    |
| 14.950 | -0.18682 | 1.1832     | -1.3700     | 1.0362    | -0.033100  | 0.18011    |
| 15.000 | 2.7117   | 0.91125    | 1.8005      | 0.79175   | -0.036300  | 0.15578    |
| 15.050 | 3.2243   | 0.61725    | 2.6070      | 0.53063   | -0.038200  | 0.12478    |
| 15.100 | 1.8425   | 0.30952    | 1.5330      | 0.25938   | -0.038700  | 0.088900   |
| 15.150 | 1.8240   | -0.0033900 | 1.8274      | -0.038400 | 0.038000   | 0.050000   |
| 15.200 | -0.95844 | -0.31291   | -0.64553    | -0.28713  | -0.036100  | 0.010400   |
| 15.250 | 0.60100  | -0.61065   | 1.2117      | -0.54933  | -0.033200  | -0.028100  |
| 15.300 | -0.63540 | -0.88872   | 0.25332     | -0.79582  | -0.029300  | -0.063600  |
| 15.350 | 7.3717   | -1.1399    | 8.5116      | -1.0209   | -0.024600  | -0.094400  |
| 15.400 | 3.6054   | -1.3579    | 4.9633      | -1.2193   | -0.019400  | -0.11920   |
| 15.450 | 0.71016  | -1.5375    | 2.2476      | -1.3867   | -0.013800  | -0.13698   |
| 15.500 | -1.1823  | -1.6745    | 0.49226     | -1.5194   | -0.0079600 | -0.14718   |
| 15.550 | -6.6046  | -1.7663    | -4.8382     | -1.6145   | -0.0021800 | -0.14962   |
| 15.600 | -1.6705  | -1.8114    | 0.14087     | -1.6703   | 0.0033900  | -0.14452   |
| 15.650 | 1.3399   | -1.8096    | 3.1495      | -1.6857   | 0.0085900  | -0.13247   |
| 15.700 | -1.6991  | -1.7621    | 0.063000    | -1.6610   | 0.013300   | -0.11439   |
| 15.750 | -3.9598  | -1.6713    | -2.2884     | -1.5971   | 0.017300   | -0.091400  |
| 15.800 | -1.5416  | -1.5406    | -0.00099600 | -1.4961   | 0.020500   | -0.065000  |
| 15.850 | 0.35664  | -1.3744    | 1.7310      | -1.3608   | 0.023000   | -0.036600  |
| 15.900 | 0.13080  | -1.1779    | 1.3087      | -1.1949   | 0.024600   | -0.0076100 |
| 15.950 | -7.7044  | -0.95701   | -6.7473     | -1.0027   | 0.025300   | 0.020400   |
| 16.000 | -2.9794  | -0.71788   | -2.2615     | -0.78898  | 0.025100   | 0.045900   |
| 16.050 | 0.83078  | -0.46667   | 1.2924      | -0.55897  | 0.024200   | 0.068100   |
| 16.100 | -2.7363  | -0.20990   | -2.5264     | -0.31833  | 0.022500   | 0.085900   |
| 16.150 | -0.13529 | 0.045900   | -0.18120    | -0.073000 | 0.020200   | 0.098700   |
| 16.200 | -4.7816  | 0.29454    | -5.0761     | 0.17116   | 0.017400   | 0.10602    |
| 16.250 | 1.5656   | 0.53012    | 1.0355      | 0.40821   | 0.014100   | 0.10783    |
| 16.300 | -2.6088  | 0.74734    | -3.3562     | 0.63257   | 0.010500   | 0.10427    |
| 16.350 | 0.34916  | 0.94152    | -0.59237    | 0.83900   | 0.0067700  | 0.095800   |
| 16.400 | -0.52957 | 1.1087     | -1.6383     | 1.0228    | 0.0030100  | 0.082900   |
| 16.450 | -2.5220  | 1.2458     | -3.7678     | 1.1797    | -0.0065500 | 0.066700   |
| 16.500 | 1.8971   | 1.3503     | 0.54684     | 1.3065    | -0.0041100 | 0.047900   |
| 16.550 | 1.7902   | 1.4208     | 0.36935     | 1.4004    | -0.0072600 | 0.027700   |
| 16.600 | -3.9483  | 1.4567     | -5.4049     | 1.4596    | -0.0100000 | 0.0075000  |
| 16.650 | 9.9161   | 1.4580     | 8.4581      | 1.4832    | -0.012300  | -0.012900  |
| 16.700 | -2.3874  | 1.4257     | -3.8131     | 1.4711    | -0.014000  | -0.031300  |
| 16.750 | -2.1956  | 1.3615     | -3.5572     | 1.4240    | -0.015200  | -0.047200  |
| 16.800 | 0.24737  | 1.2677     | -1.0203     | 1.3436    | -0.015900  | -0.060000  |
| 16.850 | -4.7015  | 1.1470     | -5.8485     | 1.2323    | -0.016000  | -0.069300  |
| 16.900 | 1.2973   | 1.0030     | 0.29437     | 1.0932    | -0.015500  | -0.074700  |
| 16.950 | 4.5690   | 0.83931    | 3.7296      | 0.93006   | -0.014600  | -0.076100  |
| 17.000 | 0.21956  | 0.65992    | -0.44036    | 0.74703   | -0.013300  | -0.073800  |
| 17.050 | -10.877  | 0.46907    | -11.346     | 0.54868   | -0.011600  | -0.068000  |
| 17.100 | -1.5282  | 0.27132    | -1.7995     | 0.34008   | -0.0096300 | -0.059100  |

|        |          |          |         |           |             |            |
|--------|----------|----------|---------|-----------|-------------|------------|
| 17.150 | -1.0949  | 0.071200 | -1.1661 | 0.12640   | -0.0074400  | -0.047800  |
| 17.200 | 1.1167   | -0.12684 | 1.2435  | -0.087100 | -0.0051300  | -0.034600  |
| 17.250 | -3.8207  | -0.31847 | -3.5022 | -0.29531  | -0.0027800  | -0.020400  |
| 17.300 | 6.8839   | -0.49956 | 7.3835  | -0.49324  | -0.00046300 | -0.0058600 |
| 17.350 | 5.6139   | -0.66632 | 6.2802  | -0.67627  | 0.0017400   | 0.0082200  |
| 17.400 | -10.769  | -0.81528 | -9.9537 | -0.84023  | 0.0037600   | 0.021200   |
| 17.450 | -2.2418  | -0.94344 | -1.2984 | -0.98143  | 0.0055400   | 0.032500   |
| 17.500 | 0.019100 | 0.019100 | 0.0000  | -1.0968   | 0.0070400   | 0.041500   |
| 17.550 | 1.5054   | 1.5054   | 0.0000  | -1.1841   | 0.0082300   | 0.048100   |
| 17.600 | 0.89250  | 0.89250  | 0.0000  | -1.2415   | 0.0090800   | 0.052000   |
| 17.650 | 5.1860   | 5.1860   | 0.0000  | -1.2682   | 0.0095800   | 0.053100   |
| 17.700 | 0.31319  | 0.31319  | 0.0000  | -1.2640   | 0.0097500   | 0.051500   |
| 17.750 | 10.038   | 10.038   | 0.0000  | -1.2296   | 0.0095800   | 0.047500   |
| 17.800 | 13.564   | 13.564   | 0.0000  | -1.1663   | 0.0091100   | 0.041300   |
| 17.850 | 15.489   | 15.489   | 0.0000  | -1.0761   | 0.0083700   | 0.033400   |
| 17.900 | 20.270   | 20.270   | 0.0000  | -0.96165  | 0.0074000   | 0.024300   |
| 17.950 | 21.527   | 21.527   | 0.0000  | -0.82619  | 0.0062400   | 0.014400   |
| 18.000 | 29.534   | 29.534   | 0.0000  | -0.67237  | 0.0049500   | 0.0043300  |
