# Supplementary material
Source: PubMed Central journal article supplement (PMC8325642)
Supplement: NIHMS1698257-supplement-Fig__4E_Insertase_pH8_R_space_EXAFS.pdf [file NIHMS1698257-supplement-Fig__4E_Insertase_pH8_R_space_EXAFS.pdf]

| R        | Insertase-pH8 | Flt     | Mo-Oxo  | Mo-O     | Mo-S     |
|----------|---------------|---------|---------|----------|----------|
| 0.0000   | 0.78499       | 0.82613 | 0.89955 | 0.16764  | 0.18437  |
| 0.030700 | 0.68045       | 0.80460 | 0.90502 | 0.17512  | 0.18152  |
| 0.061400 | 0.54662       | 0.71531 | 0.73819 | 0.18084  | 0.15752  |
| 0.092000 | 0.41427       | 0.57116 | 0.51806 | 0.18244  | 0.16728  |
| 0.12272  | 0.34307       | 0.38983 | 0.27249 | 0.17880  | 0.15734  |
| 0.15340  | 0.38791       | 0.19954 | 0.11925 | 0.17006  | 0.14736  |
| 0.18408  | 0.50745       | 0.12721 | 0.30548 | 0.15748  | 0.13862  |
| 0.21476  | 0.63570       | 0.27849 | 0.52152 | 0.14336  | 0.13177  |
| 0.24544  | 0.73912       | 0.44135 | 0.69417 | 0.13088  | 0.12673  |
| 0.27612  | 0.80139       | 0.56985 | 0.80588 | 0.12327  | 0.12294  |
| 0.30680  | 0.81576       | 0.65187 | 0.84831 | 0.12232  | 0.11989  |
| 0.33748  | 0.78231       | 0.68312 | 0.81984 | 0.12704  | 0.11751  |
| 0.36816  | 0.70771       | 0.66505 | 0.72508 | 0.13432  | 0.11620  |
| 0.39884  | 0.60630       | 0.60449 | 0.57446 | 0.14077  | 0.11653  |
| 0.42951  | 0.50352       | 0.51397 | 0.38403 | 0.14384  | 0.11865  |
| 0.46019  | 0.43963       | 0.41310 | 0.18070 | 0.14220  | 0.12191  |
| 0.49087  | 0.45247       | 0.33194 | 0.12043 | 0.13566  | 0.12498  |
| 0.52155  | 0.53315       | 0.30640 | 0.29691 | 0.12522  | 0.12624  |
| 0.55223  | 0.63905       | 0.34192 | 0.46708 | 0.11313  | 0.12430  |
| 0.58291  | 0.73586       | 0.40303 | 0.59322 | 0.10284  | 0.11843  |
| 0.61359  | 0.80427       | 0.45775 | 0.66226 | 0.098200 | 0.10892  |
| 0.64427  | 0.83553       | 0.49181 | 0.66870 | 0.10142  | 0.097400 |
| 0.67495  | 0.82897       | 0.50385 | 0.61431 | 0.11078  | 0.087300 |
| 0.70563  | 0.79166       | 0.50202 | 0.50253 | 0.12243  | 0.082020 |
| 0.73631  | 0.73884       | 0.50110 | 0.37962 | 0.13259  | 0.088000 |
| 0.76699  | 0.69359       | 0.51618 | 0.28710 | 0.13863  | 0.099700 |
| 0.79767  | 0.68134       | 0.55291 | 0.32842 | 0.13917  | 0.11357  |
| 0.82835  | 0.71573       | 0.60292 | 0.47076 | 0.13402  | 0.12492  |
| 0.85903  | 0.78813       | 0.62443 | 0.62453 | 0.12435  | 0.13055  |
| 0.88971  | 0.87535       | 0.67358 | 0.74437 | 0.11289  | 0.12898  |
| 0.92039  | 0.95355       | 0.66267 | 0.80672 | 0.10420  | 0.11955  |
| 0.95107  | 1.0048        | 0.60935 | 0.79776 | 0.10348  | 0.10373  |
| 0.98175  | 1.0182        | 0.51682 | 0.71199 | 0.11299  | 0.085600 |
| 1.0124   | 0.98943       | 0.40810 | 0.55311 | 0.12994  | 0.074100 |
| 1.0431   | 0.92066       | 0.35140 | 0.34084 | 0.14930  | 0.070700 |
| 1.0738   | 0.81971       | 0.43388 | 0.18751 | 0.16662  | 0.10125  |
| 1.1045   | 0.69557       | 0.62205 | 0.37581 | 0.17887  | 0.12833  |
| 1.1351   | 0.57673       | 0.83919 | 0.67835 | 0.18435  | 0.15290  |
| 1.1658   | 0.46746       | 1.0377  | 0.97165 | 0.18282  | 0.17006  |
| 1.1965   | 0.38000       | 1.1845  | 1.2136  | 0.17571  | 0.17698  |
| 1.2272   | 0.30660       | 1.3714  | 1.3714  | 0.16552  | 0.17275  |
| 1.2579   | 0.23169       | 1.2190  | 1.4174  | 0.16101  | 0.15898  |
| 1.2885   | 0.18881       | 1.0673  | 1.3296  | 0.16552  | 0.14124  |
| 1.3192   | 0.31924       | 0.78653 | 1.0942  | 0.18308  | 0.13118  |
| 1.3499   | 0.61731       | 0.37329 | 0.71111 | 0.21116  | 0.14276  |
| 1.3806   | 1.03946       | 0.26753 | 0.24753 | 0.24415  | 0.17761  |
| 1.4113   | 1.5549        | 0.82674 | 0.63308 | 0.27644  | 0.22473  |
| 1.4419   | 2.1644        | 1.5816  | 1.4290  | 0.30380  | 0.27263  |
| 1.4726   | 2.8444        | 2.4072  | 2.3395  | 0.32380  | 0.31267  |
| 1.5033   | 3.5716        | 3.2724  | 3.3140  | 0.33632  | 0.33846  |
| 1.5340   | 4.3181        | 4.1423  | 4.3093  | 0.34425  | 0.34556  |
| 1.5647   | 5.0534        | 4.9804  | 5.2810  | 0.35420  | 0.33179  |
| 1.5953   | 5.7457        | 5.7509  | 6.1851  | 0.37597  | 0.29816  |
| 1.6260   | 6.3636        | 6.4202  | 6.9798  | 0.41927  | 0.25135  |
| 1.6567   | 6.8783        | 6.9591  | 7.6283  | 0.48896  | 0.20992  |
| 1.6874   | 7.2647        | 7.3448  | 8.0999  | 0.58334  | 0.20952  |
| 1.7181   | 7.5031        | 7.5614  | 8.3729  | 0.69645  | 0.26947  |
| 1.7487   | 7.5803        | 7.6012  | 8.4348  | 0.82078  | 0.36519  |
| 1.7794   | 7.4903        | 7.4648  | 8.2838  | 0.94868  | 0.47296  |
| 1.8101   | 7.2345        | 7.1609  | 7.9281  | 1.0729   | 0.57258  |
| 1.8408   | 6.8219        | 6.7051  | 7.3858  | 1.1867   | 0.65323  |
| 1.8715   | 6.2680        | 6.1193  | 6.6839  | 1.2842   | 0.70669  |
| 1.9021   | 5.5941        | 5.4294  | 5.8561  | 1.3604   | 0.72905  |
| 1.9328   | 4.8261        | 4.6637  | 4.9412  | 1.4114   | 0.72312  |
| 1.9635   | 3.9925        | 3.8512  | 3.9808  | 1.4345   | 0.70292  |
| 1.9942   | 3.1234        | 3.0193  | 3.0170  | 1.4286   | 0.69939  |
| 2.0249   | 2.2485        | 2.1931  | 2.0899  | 1.3936   | 0.75729  |
| 2.0555   | 1.3982        | 1.3951  | 1.2355  | 1.3312   | 0.90896  |
| 2.0862   | 0.61822       | 0.65665 | 0.48449 | 1.2440   | 1.1521   |
| 2.1169   | 0.35636       | 0.29483 | 0.14813 | 1.1359   | 1.4636   |
| 2.1476   | 0.94713       | 0.83595 | 0.63044 | 1.0117   | 1.8181   |
| 2.1783   | 1.5410        | 1.4307  | 0.96970 | 0.87697  | 2.1926   |
| 2.2089   | 2.0644        | 1.9803  | 1.1651  | 0.73755  | 2.5668   |
| 2.2396   | 2.5117        | 2.4248  | 1.2264  | 0.59064  | 2.9220   |
| 2.2703   | 2.8850        | 2.9101  | 1.1702  | 0.46954  | 3.2414   |
| 2.3010   | 3.1884        | 3.2802  | 1.0181  | 0.35386  | 3.5104   |
| 2.3317   | 3.4259        | 3.5786  | 0.79534 | 0.26003  | 3.7165   |
| 2.3623   | 3.5999        | 3.7980  | 0.52899 | 0.19646  | 3.8508   |
| 2.3930   | 3.7109        | 3.9315  | 0.24738 | 0.16815  | 3.9073   |
| 2.4237   | 3.7580        | 3.9740  | 0.06600 | 0.16632  | 3.8840   |
| 2.4544   | 3.7392        | 3.9232  | 0.29130 | 0.17289  | 3.7822   |
| 2.4850   | 3.6531        | 3.7805  | 0.49323 | 0.17532  | 3.6070   |
| 2.5157   | 3.4977        | 3.5519  | 0.63950 | 0.16890  | 3.3666   |
| 2.5464   | 3.2815        | 3.2475  | 0.72290 | 0.15349  | 3.0718   |
| 2.5771   | 3.0043        | 2.8813  | 0.74248 | 0.13139  | 2.7357   |
| 2.6078   | 2.6773        | 2.4709  | 0.70257 | 0.10657  | 2.3724   |
| 2.6384   | 2.3135        | 2.0360  | 0.61196 | 0.084700 | 1.9970   |
| 2.6691   | 1.9291        | 1.5979  | 0.48316 | 0.073000 | 1.6239   |
| 2.6998   | 1.5434        | 1.1785  | 0.33228 | 0.074800 | 1.2668   |
| 2.7305   | 1.1801        | 0.80113 | 0.18402 | 0.084900 | 0.93778  |
| 2.7612   | 0.87010       | 0.49623 | 0.11888 | 0.095600 | 0.64672  |

|        |          |           |          |           |           |
|--------|----------|-----------|----------|-----------|-----------|
| 2.7918 | 0.65587  | 0.32136   | 0.20783  | 0.10215   | 0.40117   |
| 2.8225 | 0.57699  | 0.32606   | 0.21678  | 0.20692   | 0.31679   |
| 2.8532 | 0.60948  | 0.40389   | 0.39812  | 0.097100  | 0.075400  |
| 2.8839 | 0.67603  | 0.45831   | 0.44372  | 0.085900  | 0.070300  |
| 2.9146 | 0.72221  | 0.46558   | 0.45058  | 0.070600  | 0.11104   |
| 2.9452 | 0.72596  | 0.42693   | 0.42066  | 0.053700  | 0.12159   |
| 2.9759 | 0.68247  | 0.35298   | 0.35928  | 0.038900  | 0.10296   |
| 3.0066 | 0.59562  | 0.29160   | 0.27464  | 0.026600  | 0.066100  |
| 3.0373 | 0.47411  | 0.18484   | 0.17848  | 0.037700  | 0.046600  |
| 3.0680 | 0.32938  | 0.17623   | 0.095400 | 0.047500  | 0.090000  |
| 3.0986 | 0.17447  | 0.23608   | 0.10046  | 0.056200  | 0.15026   |
| 3.1293 | 0.035100 | 0.30853   | 0.17330  | 0.061300  | 0.20625   |
| 3.1600 | 0.12871  | 0.36418   | 0.24261  | 0.062100  | 0.25053   |
| 3.1907 | 0.24635  | 0.39199   | 0.29164  | 0.058600  | 0.27996   |
| 3.2214 | 0.33549  | 0.38844   | 0.31533  | 0.051500  | 0.28989   |
| 3.2520 | 0.39061  | 0.35441   | 0.31264  | 0.042000  | 0.28290   |
| 3.2827 | 0.40986  | 0.29394   | 0.28529  | 0.032300  | 0.25957   |
| 3.3134 | 0.39431  | 0.21349   | 0.23734  | 0.025600  | 0.22269   |
| 3.3441 | 0.34762  | 0.12159   | 0.17505  | 0.025500  | 0.17605   |
| 3.3748 | 0.27573  | 0.036800  | 0.10835  | 0.031000  | 0.12426   |
| 3.4054 | 0.18683  | 0.080100  | 0.064000 | 0.037600  | 0.073000  |
| 3.4361 | 0.095100 | 0.15887   | 0.090400 | 0.042600  | 0.034800  |
| 3.4668 | 0.068300 | 0.22208   | 0.14392  | 0.045000  | 0.044200  |
| 3.4975 | 0.14696  | 0.26368   | 0.19020  | 0.044300  | 0.073400  |
| 3.5282 | 0.23240  | 0.28119   | 0.22080  | 0.048900  | 0.095500  |
| 3.5588 | 0.30446  | 0.27448   | 0.23284  | 0.035000  | 0.10627   |
| 3.5895 | 0.35761  | 0.24564   | 0.22601  | 0.027900  | 0.10523   |
| 3.6202 | 0.38962  | 0.19875   | 0.20194  | 0.021500  | 0.093200  |
| 3.6509 | 0.40038  | 0.13993   | 0.16402  | 0.018300  | 0.072100  |
| 3.6816 | 0.39148  | 0.099000  | 0.11751  | 0.020200  | 0.044300  |
| 3.7122 | 0.36583  | 0.054300  | 0.072000 | 0.024900  | 0.012800  |
| 3.7429 | 0.32728  | 0.094600  | 0.054200 | 0.029600  | 0.019500  |
| 3.7736 | 0.28016  | 0.14509   | 0.082300 | 0.032700  | 0.049600  |
| 3.8043 | 0.22878  | 0.18531   | 0.12054  | 0.033700  | 0.075200  |
| 3.8350 | 0.17702  | 0.20980   | 0.15174  | 0.032400  | 0.094100  |
| 3.8656 | 0.12796  | 0.21660   | 0.17086  | 0.029100  | 0.10515   |
| 3.8963 | 0.083700 | 0.20580   | 0.17615  | 0.024200  | 0.10771   |
| 3.9270 | 0.045500 | 0.17913   | 0.16764  | 0.018800  | 0.10197   |
| 3.9577 | 0.016800 | 0.13971   | 0.14681  | 0.014500  | 0.088800  |
| 3.9883 | 0.024500 | 0.092000  | 0.11645  | 0.013600  | 0.069500  |
| 4.0190 | 0.047600 | 0.043300  | 0.081000 | 0.016400  | 0.046100  |
| 4.0497 | 0.068500 | 0.024400  | 0.049400 | 0.020400  | 0.020700  |
| 4.0804 | 0.085400 | 0.073100  | 0.045200 | 0.023800  | 0.0057500 |
| 4.1111 | 0.096900 | 0.11238   | 0.070300 | 0.025800  | 0.028600  |
| 4.1417 | 0.10157  | 0.14157   | 0.098800 | 0.026200  | 0.048200  |
| 4.1724 | 0.098300 | 0.15819   | 0.12115  | 0.024800  | 0.062600  |
| 4.2031 | 0.057400 | 0.16140   | 0.16140  | 0.022000  | 0.070300  |
| 4.2338 | 0.072200 | 0.15171   | 0.13683  | 0.018300  | 0.072900  |
| 4.2645 | 0.064500 | 0.13071   | 0.12936  | 0.014500  | 0.068700  |
| 4.2951 | 0.082100 | 0.10107   | 0.11299  | 0.012100  | 0.059100  |
| 4.3258 | 0.12324  | 0.066600  | 0.089800 | 0.012400  | 0.045100  |
| 4.3565 | 0.17644  | 0.034500  | 0.063100 | 0.014700  | 0.028100  |
| 4.3872 | 0.23454  | 0.031600  | 0.038600 | 0.017500  | 0.0097700 |
| 4.4179 | 0.29299  | 0.057800  | 0.031800 | 0.019800  | 0.0088700 |
| 4.4485 | 0.34826  | 0.083700  | 0.047700 | 0.020900  | 0.025400  |
| 4.4792 | 0.39757  | 0.10244   | 0.067300 | 0.020700  | 0.039000  |
| 4.5099 | 0.43881  | 0.11208   | 0.082700 | 0.019300  | 0.048900  |
| 4.5406 | 0.47071  | 0.11217   | 0.091500 | 0.016800  | 0.054300  |
| 4.5713 | 0.49280  | 0.10322   | 0.092900 | 0.013700  | 0.055100  |
| 4.6019 | 0.50540  | 0.086600  | 0.087300 | 0.010600  | 0.051500  |
| 4.6326 | 0.50942  | 0.064300  | 0.075600 | 0.0085800 | 0.044100  |
| 4.6633 | 0.50621  | 0.039600  | 0.059700 | 0.0086900 | 0.033700  |
| 4.6940 | 0.49721  | 0.019700  | 0.042300 | 0.010400  | 0.021300  |
| 4.7247 | 0.48368  | 0.028800  | 0.028800 | 0.012500  | 0.0082400 |
| 4.7553 | 0.46645  | 0.046700  | 0.028500 | 0.014100  | 0.0049800 |
| 4.7860 | 0.44580  | 0.063900  | 0.039500 | 0.014800  | 0.016300  |
| 4.8167 | 0.42156  | 0.075500  | 0.051700 | 0.014500  | 0.025400  |
| 4.8474 | 0.39330  | 0.080500  | 0.060800 | 0.013400  | 0.031700  |
| 4.8781 | 0.36088  | 0.078700  | 0.065200 | 0.011700  | 0.034700  |
| 4.9087 | 0.32318  | 0.078000  | 0.064500 | 0.008400  | 0.034400  |
| 4.9394 | 0.28345  | 0.057900  | 0.059000 | 0.0079300 | 0.030900  |
| 4.9701 | 0.24166  | 0.041600  | 0.049300 | 0.0073100 | 0.024900  |
| 5.0008 | 0.20202  | 0.023900  | 0.036700 | 0.0080100 | 0.016800  |
| 5.0315 | 0.17019  | 0.011300  | 0.022600 | 0.0093800 | 0.0076100 |
| 5.0621 | 0.15621  | 0.019200  | 0.019200 | 0.011900  | 0.0021600 |
| 5.0928 | 0.15500  | 0.032600  | 0.013700 | 0.011600  | 0.011100  |
| 5.1235 | 0.17106  | 0.043200  | 0.024600 | 0.011800  | 0.019000  |
| 5.1542 | 0.19278  | 0.049500  | 0.034000 | 0.011400  | 0.025000  |
| 5.1849 | 0.21301  | 0.051200  | 0.040400 | 0.010300  | 0.028800  |
| 5.2155 | 0.22734  | 0.048300  | 0.043100 | 0.0087900 | 0.030100  |
| 5.2462 | 0.23465  | 0.041400  | 0.042200 | 0.0071500 | 0.029100  |
| 5.2769 | 0.22998  | 0.031400  | 0.038100 | 0.0058200 | 0.025800  |
| 5.3076 | 0.21712  | 0.019500  | 0.031300 | 0.0053500 | 0.020700  |
| 5.3383 | 0.19547  | 0.0077000 | 0.022800 | 0.0058500 | 0.014300  |
| 5.3689 | 0.16646  | 0.0087900 | 0.014400 | 0.0068500 | 0.0073700 |
| 5.3996 | 0.13254  | 0.014900  | 0.014900 | 0.0078000 | 0.0024200 |
| 5.4303 | 0.098700 | 0.028300  | 0.014800 | 0.0084300 | 0.0073500 |
| 5.4610 | 0.077200 | 0.034700  | 0.021800 | 0.0086100 | 0.012800  |
| 5.4917 | 0.087100 | 0.037900  | 0.027700 | 0.0083400 | 0.017000  |
| 5.5223 | 0.12453  | 0.037900  | 0.031600 | 0.0077000 | 0.019400  |
| 5.5530 | 0.17364  | 0.035000  | 0.033200 | 0.0068300 | 0.020100  |
| 5.5837 | 0.22682  | 0.029700  | 0.032400 | 0.0059600 | 0.019000  |

|        |          |           |           |            |            |
|--------|----------|-----------|-----------|------------|------------|
| 5.6144 | 0.28079  | 0.022600  | 0.029400  | 0.0053200  | 0.016400   |
| 5.6145 | 0.13461  | 0.024600  | 0.026400  | 0.0051100  | 0.012600   |
| 5.6757 | 0.38375  | 0.0074600 | 0.018700  | 0.0053200  | 0.0080400  |
| 5.7064 | 0.42983  | 0.0062300 | 0.012100  | 0.0057100  | 0.0038300  |
| 5.7371 | 0.47057  | 0.011400  | 0.0055600 | 0.0060700  | 0.0042800  |
| 5.7678 | 0.50478  | 0.016200  | 0.0028600 | 0.0062400  | 0.0082100  |
| 5.7984 | 0.53148  | 0.019400  | 0.0073600 | 0.0061400  | 0.011900   |
| 5.8291 | 0.54988  | 0.022100  | 0.0067000 | 0.0057800  | 0.014500   |
| 5.8598 | 0.55955  | 0.020000  | 0.014300  | 0.0052100  | 0.016000   |
| 5.8905 | 0.56042  | 0.017600  | 0.015700  | 0.0045400  | 0.016100   |
| 5.9212 | 0.55284  | 0.013900  | 0.015600  | 0.0039200  | 0.015100   |
| 5.9518 | 0.53751  | 0.0093300 | 0.014300  | 0.0034900  | 0.013000   |
| 5.9825 | 0.51552  | 0.0043600 | 0.011900  | 0.0033900  | 0.010100   |
| 6.0132 | 0.48819  | 0.0018000 | 0.0088400 | 0.0035500  | 0.0069900  |
| 6.0439 | 0.45639  | 0.0052500 | 0.0053900 | 0.0038200  | 0.0044800  |
| 6.0746 | 0.42339  | 0.0088500 | 0.0019600 | 0.0040600  | 0.0045000  |
| 6.1052 | 0.38868  | 0.011400  | 0.0017400 | 0.0041700  | 0.0066500  |
| 6.1359 | 0.35386  | 0.012800  | 0.0044800 | 0.0041200  | 0.0089600  |
| 6.1666 | 0.31350  | 0.013100  | 0.0067000 | 0.0039100  | 0.010700   |
| 6.1973 | 0.28575  | 0.012300  | 0.0082100 | 0.0036000  | 0.011700   |
| 6.2280 | 0.25235  | 0.010700  | 0.0089900 | 0.0032300  | 0.011800   |
| 6.2586 | 0.21887  | 0.0085600 | 0.0090800 | 0.0028900  | 0.011100   |
| 6.2893 | 0.18481  | 0.0060700 | 0.0085800 | 0.0026500  | 0.0098900  |
| 6.3200 | 0.14989  | 0.0036700 | 0.0076400 | 0.0025400  | 0.0080900  |
| 6.3507 | 0.11507  | 0.0024500 | 0.0064400 | 0.0025400  | 0.0062800  |
| 6.3814 | 0.078400 | 0.0028300 | 0.0051900 | 0.0026300  | 0.0049400  |
| 6.4120 | 0.045100 | 0.0043600 | 0.0041200 | 0.0027000  | 0.0047000  |
| 6.4427 | 0.027000 | 0.0057200 | 0.0034400 | 0.0027300  | 0.0054900  |
| 6.4734 | 0.044500 | 0.0067600 | 0.0031900 | 0.0027000  | 0.0066100  |
| 6.5041 | 0.072200 | 0.0074600 | 0.0032000 | 0.0026100  | 0.0075500  |
| 6.5348 | 0.097800 | 0.0078400 | 0.0032000 | 0.0024700  | 0.0080800  |
| 6.5654 | 0.11844  | 0.0079200 | 0.0030300 | 0.0023000  | 0.0081500  |
| 6.5961 | 0.13265  | 0.0077000 | 0.0026500 | 0.0021300  | 0.0077700  |
| 6.6268 | 0.13952  | 0.0071500 | 0.0021300 | 0.0019600  | 0.0070400  |
| 6.6575 | 0.13853  | 0.0062700 | 0.0017100 | 0.0018100  | 0.0061200  |
| 6.6882 | 0.12985  | 0.0050700 | 0.0018000 | 0.0016800  | 0.0052000  |
| 6.7188 | 0.11281  | 0.0036700 | 0.0024500 | 0.0015700  | 0.0045200  |
| 6.7495 | 0.088900 | 0.0024900 | 0.0033000 | 0.0014800  | 0.0042800  |
| 6.7802 | 0.058900 | 0.0026200 | 0.0041100 | 0.0014100  | 0.0044400  |
| 6.8109 | 0.024200 | 0.0040800 | 0.0047500 | 0.0013600  | 0.0048000  |
| 6.8416 | 0.016400 | 0.0058500 | 0.0051300 | 0.0013300  | 0.0051400  |
| 6.8722 | 0.056300 | 0.0074700 | 0.0052300 | 0.0013200  | 0.0053200  |
| 6.9029 | 0.097300 | 0.0087300 | 0.0050200 | 0.0013000  | 0.0053000  |
| 6.9336 | 0.13723  | 0.0094800 | 0.0046000 | 0.0012700  | 0.0051000  |
| 6.9643 | 0.17443  | 0.0096500 | 0.0041000 | 0.0012000  | 0.0047700  |
| 6.9950 | 0.20766  | 0.0092200 | 0.0037300 | 0.0011000  | 0.0043900  |
| 7.0256 | 0.23266  | 0.0087600 | 0.0032600 | 0.00096000 | 0.0040500  |
| 7.0563 | 0.25828  | 0.0067400 | 0.0042200 | 0.00079000 | 0.0038200  |
| 7.0870 | 0.27451  | 0.0049500 | 0.0049300 | 0.00061200 | 0.0037200  |
| 7.1177 | 0.28447  | 0.0031100 | 0.0056400 | 0.00047800 | 0.0037100  |
| 7.1484 | 0.28838  | 0.0020300 | 0.0061700 | 0.00047200 | 0.0037300  |
| 7.1790 | 0.28675  | 0.0028300 | 0.0063800 | 0.00060400 | 0.0037200  |
| 7.2097 | 0.28097  | 0.0043500 | 0.0052300 | 0.00079100 | 0.0036500  |
| 7.2404 | 0.26988  | 0.0057000 | 0.0056900 | 0.00097400 | 0.0035100  |
| 7.2711 | 0.25641  | 0.0066600 | 0.0048500 | 0.0011200  | 0.0033200  |
| 7.3017 | 0.24081  | 0.0071500 | 0.0038700 | 0.0012200  | 0.0031000  |
| 7.3324 | 0.22392  | 0.0071500 | 0.0031100 | 0.0012600  | 0.0028900  |
| 7.3631 | 0.20651  | 0.0067400 | 0.0031100 | 0.0012300  | 0.0028700  |
| 7.3938 | 0.18927  | 0.0060300 | 0.0039200 | 0.0011400  | 0.0024800  |
| 7.4245 | 0.17288  | 0.0052100 | 0.0050300 | 0.0010000  | 0.0023100  |
| 7.4551 | 0.15810  | 0.0045500 | 0.0060400 | 0.00083400 | 0.0021300  |
| 7.4858 | 0.14578  | 0.0043300 | 0.0067400 | 0.00067400 | 0.0019800  |
| 7.5165 | 0.13686  | 0.0046300 | 0.0070100 | 0.00059000 | 0.0018900  |
| 7.5472 | 0.13221  | 0.0052400 | 0.0067900 | 0.00063800 | 0.0019100  |
| 7.5779 | 0.13232  | 0.0058900 | 0.0060900 | 0.00078500 | 0.0020800  |
| 7.6085 | 0.13708  | 0.0064000 | 0.0049900 | 0.00096000 | 0.0023600  |
| 7.6392 | 0.14588  | 0.0066800 | 0.0036600 | 0.0011100  | 0.0026900  |
| 7.6699 | 0.15792  | 0.0067100 | 0.0025700 | 0.0012200  | 0.0030000  |
| 7.7006 | 0.17249  | 0.0065300 | 0.0026400 | 0.0012600  | 0.0032200  |
| 7.7313 | 0.18916  | 0.0063000 | 0.0038900 | 0.0012300  | 0.0033200  |
| 7.7619 | 0.20766  | 0.0059300 | 0.0053800 | 0.0011400  | 0.0032500  |
| 7.7926 | 0.22782  | 0.0057400 | 0.0067000 | 0.0010100  | 0.0030200  |
| 7.8233 | 0.24939  | 0.0057400 | 0.0076500 | 0.00085600 | 0.0026200  |
| 7.8540 | 0.27188  | 0.0059300 | 0.0081300 | 0.00074000 | 0.0020600  |
| 7.8847 | 0.29453  | 0.0065000 | 0.0081500 | 0.00071700 | 0.0013800  |
| 7.9153 | 0.31633  | 0.0065800 | 0.0076000 | 0.00079900 | 0.00064700 |
| 7.9460 | 0.33604  | 0.0068300 | 0.0067300 | 0.00093400 | 0.00023400 |
| 7.9767 | 0.35231  | 0.0069600 | 0.0057000 | 0.0010600  | 0.00094300 |
| 8.0074 | 0.36382  | 0.0069200 | 0.0048700 | 0.0011500  | 0.0016300  |
| 8.0381 | 0.36937  | 0.0067400 | 0.0046600 | 0.0011700  | 0.0021900  |
| 8.0687 | 0.36681  | 0.0064600 | 0.0052500 | 0.0011200  | 0.0026000  |
| 8.0994 | 0.35910  | 0.0061400 | 0.0063000 | 0.0010000  | 0.0028300  |
| 8.1301 | 0.34241  | 0.0058800 | 0.0073800 | 0.00083300 | 0.0028600  |
| 8.1608 | 0.31815  | 0.0057500 | 0.0082000 | 0.00065800 | 0.0027200  |
| 8.1915 | 0.28699  | 0.0057600 | 0.0086200 | 0.00057100 | 0.0024300  |
| 8.2221 | 0.25316  | 0.0055000 | 0.0085000 | 0.00065600 | 0.0020700  |
| 8.2528 | 0.20553  | 0.0060500 | 0.0079600 | 0.00086500 | 0.0017600  |
| 8.2835 | 0.16798  | 0.0061600 | 0.0069000 | 0.0011000  | 0.0016700  |
| 8.3142 | 0.13040  | 0.0061500 | 0.0054300 | 0.0013200  | 0.0018700  |
| 8.3449 | 0.10556  | 0.0059800 | 0.0036800 | 0.0014700  | 0.0022500  |
| 8.3755 | 0.10402  | 0.0056400 | 0.0018400 | 0.0015600  | 0.0026500  |
| 8.4062 | 0.12467  | 0.0051800 | 0.0010500 | 0.0015600  | 0.0029700  |

|        |          |            |            |            |            |
|--------|----------|------------|------------|------------|------------|
| 8.4369 | 0.15571  | 0.0046800  | 0.0025700  | 0.0015000  | 0.0031300  |
| 8.4676 | 0.14935  | 0.0043000  | 0.0042300  | 0.0013700  | 0.0031200  |
| 8.4983 | 0.21818  | 0.0041800  | 0.0056100  | 0.0012100  | 0.0029100  |
| 8.5289 | 0.24297  | 0.0043700  | 0.0066000  | 0.0010500  | 0.0025100  |
| 8.5596 | 0.26156  | 0.0047900  | 0.0071500  | 0.00092800 | 0.0019700  |
| 8.5903 | 0.27334  | 0.0052600  | 0.0072400  | 0.00088500 | 0.0013000  |
| 8.6210 | 0.27814  | 0.0056400  | 0.0068900  | 0.00091900 | 0.00058900 |
| 8.6517 | 0.27607  | 0.0058200  | 0.0061500  | 0.00099400 | 0.00028000 |
| 8.6823 | 0.26747  | 0.0057300  | 0.0059000  | 0.0010700  | 0.00092500 |
| 8.7130 | 0.25291  | 0.0053500  | 0.0038100  | 0.0011000  | 0.0015300  |
| 8.7437 | 0.23315  | 0.0046900  | 0.0024100  | 0.0010900  | 0.0020000  |
| 8.7744 | 0.20915  | 0.0037800  | 0.0010400  | 0.0010200  | 0.0023100  |
| 8.8050 | 0.18210  | 0.0026800  | 0.00051100 | 0.00090100 | 0.0024300  |
| 8.8357 | 0.15354  | 0.0014800  | 0.0015500  | 0.00074300 | 0.0023500  |
| 8.8664 | 0.12553  | 0.00030000 | 0.0024200  | 0.00056500 | 0.0021000  |
| 8.8971 | 0.10111  | 0.00092500 | 0.0030100  | 0.00039600 | 0.0016900  |
| 8.9278 | 0.084700 | 0.0019200  | 0.0032800  | 0.00029000 | 0.0011800  |
| 8.9584 | 0.080500 | 0.0027000  | 0.0032200  | 0.00030400 | 0.00063900 |
| 8.9891 | 0.088100 | 0.0032100  | 0.0028700  | 0.00039100 | 0.00044300 |
| 9.0198 | 0.10193  | 0.0034300  | 0.0022800  | 0.00048100 | 0.00088600 |
| 9.0505 | 0.11681  | 0.0033500  | 0.0015000  | 0.00054300 | 0.0014000  |
| 9.0812 | 0.12962  | 0.0029800  | 0.00059800 | 0.00057100 | 0.0018400  |
| 9.1118 | 0.13871  | 0.0023900  | 0.00033600 | 0.00057100 | 0.0021500  |
| 9.1425 | 0.14327  | 0.0016300  | 0.0012300  | 0.00055300 | 0.0023200  |
| 9.1732 | 0.14303  | 0.00080900 | 0.0020300  | 0.00053200 | 0.0023300  |
| 9.2039 | 0.13807  | 0.00043200 | 0.0026600  | 0.00052600 | 0.0022000  |
| 9.2346 | 0.12883  | 0.0011100  | 0.0031100  | 0.00054100 | 0.0019500  |
| 9.2652 | 0.11603  | 0.0018200  | 0.0033300  | 0.00057300 | 0.0016200  |
| 9.2959 | 0.10079  | 0.0023700  | 0.0033500  | 0.00060900 | 0.0012500  |
| 9.3266 | 0.084900 | 0.0027300  | 0.0031700  | 0.00063500 | 0.00090500 |
| 9.3573 | 0.071300 | 0.0028700  | 0.0028500  | 0.00064400 | 0.00069400 |
| 9.3880 | 0.064700 | 0.0028000  | 0.0024300  | 0.00062900 | 0.00068900 |
| 9.4186 | 0.069400 | 0.0025500  | 0.0020100  | 0.00059000 | 0.00080200 |
| 9.4493 | 0.084500 | 0.0021600  | 0.0016800  | 0.00053200 | 0.00089900 |
| 9.4800 | 0.10567  | 0.0017100  | 0.0015400  | 0.00046100 | 0.00091400 |
| 9.5107 | 0.12963  | 0.0013600  | 0.0015900  | 0.00038600 | 0.00082500 |
| 9.5414 | 0.15433  | 0.0012900  | 0.0017300  | 0.00032000 | 0.00063400 |
| 9.5720 | 0.17850  | 0.0015800  | 0.0018800  | 0.00027500 | 0.00035900 |
| 9.6027 | 0.20126  | 0.0020500  | 0.0019600  | 0.00026000 | 0.00014500 |
| 9.6334 | 0.22191  | 0.0025500  | 0.0019800  | 0.00026900 | 0.00044900 |
| 9.6641 | 0.23993  | 0.0030100  | 0.0019400  | 0.00029000 | 0.00084900 |
| 9.6948 | 0.25491  | 0.0033900  | 0.0019000  | 0.00031100 | 0.0012400  |
| 9.7254 | 0.26660  | 0.0036900  | 0.0018700  | 0.00032700 | 0.0015800  |
| 9.7561 | 0.27490  | 0.0038800  | 0.0018700  | 0.00033700 | 0.0018600  |
| 9.7868 | 0.27985  | 0.0039500  | 0.0018700  | 0.00034000 | 0.0020500  |
| 9.8175 | 0.28166  | 0.0038800  | 0.0018600  | 0.00033800 | 0.0021500  |
| 9.8482 | 0.28070  | 0.0036700  | 0.0017700  | 0.00033100 | 0.0021500  |
| 9.8788 | 0.27743  | 0.0033200  | 0.0015900  | 0.00032200 | 0.0020700  |
| 9.9095 | 0.27241  | 0.0028200  | 0.0013000  | 0.00031100 | 0.0019100  |
| 9.9402 | 0.26623  | 0.0021900  | 0.00090800 | 0.00030400 | 0.0017000  |
| 9.9709 | 0.25947  | 0.0014600  | 0.00050000 | 0.00030300 | 0.0014500  |
