# Supplementary material
Source: PubMed Central journal article supplement (PMC8325642)
Supplement: NIHMS1698257-supplement-Fig__4F_Insertase_EXAFS_real.pdf [file NIHMS1698257-supplement-Fig__4F_Insertase_EXAFS_real.pdf]

| R        | Insertase-pH8 | Fit       | Residue   | Mo-Oxo     | Mo-Oxo-5 | Mo-O      | Mo-O-13 | Mo-S       | Mo-S-18 |
|----------|---------------|-----------|-----------|------------|----------|-----------|---------|------------|---------|
| 0.0000   | -0.11781      | 0.14395   | -0.26177  | -0.14149   | -51.415  | 0.16330   | -12.837 | 0.12214    | -17.878 |
| 0.030700 | 0.30423       | 0.46926   | -0.16502  | 0.21590    | -47.841  | 0.16092   | -12.839 | 0.092400   | -17.908 |
| 0.061400 | 0.49590       | 0.63412   | -0.13822  | 0.42820    | -45.718  | 0.14754   | -12.852 | 0.058400   | -17.942 |
| 0.092000 | 0.38531       | 0.57111   | -0.18590  | 0.42609    | -45.739  | 0.12050   | -12.879 | 0.024500   | -17.976 |
| 0.12272  | 0.054200      | 0.32853   | -0.27430  | 0.25103    | -47.490  | 0.082600  | -12.917 | -0.0051000 | -18.005 |
| 0.15340  | -0.30735      | 0.044000  | -0.35137  | 0.031600   | -49.684  | 0.041000  | -12.959 | -0.028600  | -18.029 |
| 0.18408  | -0.49764      | -0.12709  | -0.37055  | -0.084500  | -50.845  | 0.0039800 | -12.996 | -0.046500  | -18.046 |
| 0.21476  | -0.40330      | -0.091700 | -0.31159  | -0.0081900 | -50.082  | -0.022900 | -13.023 | -0.060700  | -18.061 |
| 0.24544  | -0.054900     | 0.13342   | -0.18829  | 0.24510    | -47.549  | -0.039000 | -13.039 | -0.072600  | -18.073 |
| 0.27612  | 0.38883       | 0.43041   | -0.041600 | 0.56238    | -44.376  | -0.048800 | -13.049 | -0.083200  | -18.083 |
| 0.30680  | 0.71893       | 0.64035   | 0.078600  | 0.79116    | -42.088  | -0.058800 | -13.059 | -0.092100  | -18.092 |
| 0.33748  | 0.77928       | 0.64455   | 0.13472   | 0.81764    | -41.824  | -0.073800 | -13.074 | -0.099200  | -18.099 |
| 0.36816  | 0.54334       | 0.42567   | 0.11767   | 0.62565    | -43.743  | -0.094800 | -13.095 | -0.10522   | -18.105 |
| 0.39884  | 0.12809       | 0.077700  | 0.050400  | 0.30603    | -46.940  | -0.11738  | -13.117 | -0.11096   | -18.111 |
| 0.42951  | -0.26236      | -0.24028  | -0.022100 | 0.011500   | -49.885  | -0.13487  | -13.135 | -0.11686   | -18.117 |
| 0.46019  | -0.43601      | -0.38376  | -0.052300 | -0.12059   | -51.206  | -0.14127  | -13.141 | -0.12189   | -18.122 |
| 0.49087  | -0.30742      | -0.29564  | -0.011800 | -0.037600  | -50.376  | -0.13465  | -13.135 | -0.12336   | -18.123 |
| 0.52155  | 0.059000      | -0.035500 | 0.094500  | 0.20088    | -47.991  | -0.11828  | -13.118 | -0.11811   | -18.118 |
| 0.55223  | 0.47848       | 0.25019   | 0.22829   | 0.45369    | -45.463  | -0.099000 | -13.099 | -0.10448   | -18.104 |
| 0.58291  | 0.73423       | 0.40254   | 0.33169   | 0.57042    | -44.296  | -0.083900 | -13.084 | -0.084000  | -18.084 |
| 0.61359  | 0.68379       | 0.33204   | 0.35175   | 0.46990    | -45.301  | -0.076600 | -13.077 | -0.061200  | -18.061 |
| 0.64427  | 0.33068       | 0.066400  | 0.26427   | 0.18428    | -48.157  | -0.075400 | -13.075 | -0.042500  | -18.042 |
| 0.67495  | -0.17303      | -0.26083  | 0.087800  | -0.15457   | -51.546  | -0.074300 | -13.074 | -0.032000  | -18.032 |
| 0.70563  | -0.59632      | -0.47658  | -0.11974  | -0.38075   | -53.808  | -0.066000 | -13.066 | -0.029800  | -18.030 |
| 0.73631  | -0.73846      | -0.45686  | -0.28160  | -0.37962   | -53.796  | -0.046300 | -13.046 | -0.031000  | -18.031 |
| 0.76699  | -0.52631      | -0.19312  | -0.33319  | -0.14941   | -51.494  | -0.016000 | -13.016 | -0.027700  | -18.028 |
| 0.79767  | -0.052500     | 0.19832   | -0.25078  | 0.19337    | -48.066  | 0.018600  | -12.981 | -0.013700  | -18.014 |
| 0.82835  | 0.46480       | 0.53073   | -0.065900 | 0.46930    | -45.307  | 0.048900  | -12.951 | 0.012500   | -17.987 |
| 0.85903  | 0.76196       | 0.63966   | 0.14229   | 0.52596    | -44.740  | 0.068500  | -12.932 | 0.045200   | -17.955 |
| 0.88971  | 0.74380       | 0.46793   | 0.27587   | 0.31742    | -46.826  | 0.075900  | -12.924 | 0.074600   | -17.925 |
| 0.92039  | 0.35624       | 0.099100  | 0.25718   | -0.068100  | -50.681  | 0.076100  | -12.924 | 0.091100   | -17.909 |
| 0.95107  | -0.21657      | -0.28039  | 0.063800  | -0.44876   | -54.488  | 0.077500  | -12.922 | 0.090900   | -17.909 |
| 0.98175  | -0.72933      | -0.47339  | -0.25594  | -0.63979   | -56.398  | 0.087700  | -12.912 | 0.078700   | -17.921 |
| 10.124   | -0.96996      | -0.37510  | -0.59486  | -0.55023   | -55.502  | 0.10934   | -12.891 | 0.065800   | -17.934 |

|        |           |           |           |           |         |           |         |            |         |
|--------|-----------|-----------|-----------|-----------|---------|-----------|---------|------------|---------|
| 10.431 | -0.85592  | -0.033100 | -0.82287  | -0.23565  | -52.357 | 0.13807   | -12.862 | 0.064500   | -17.935 |
| 10.738 | -0.46616  | 0.36855   | -0.83471  | 0.12257   | -48.774 | 0.16440   | -12.836 | 0.081600   | -17.918 |
| 11.045 | 0.0056800 | 0.59682   | -0.59113  | 0.30504   | -46.950 | 0.17819   | -12.822 | 0.11358    | -17.886 |
| 11.351 | 0.35228   | 0.48956   | -0.13728  | 0.16773   | -48.323 | 0.17363   | -12.826 | 0.14820    | -17.852 |
| 11.658 | 0.45556   | 0.046100  | 0.40945   | -0.27627  | -52.763 | 0.15237   | -12.848 | 0.17001    | -17.830 |
| 11.965 | 0.33820   | -0.55974  | 0.89794   | -0.85127  | -58.513 | 0.12274   | -12.877 | 0.16878    | -17.831 |
| 12.272 | 0.13646   | -10.576   | 11.941    | -12.986   | -62.986 | 0.095600  | -12.904 | 0.14540    | -17.855 |
| 12.579 | 0.0083300 | -12.164   | 12.247    | -14.068   | -64.068 | 0.078300  | -12.922 | 0.11212    | -17.888 |
| 12.885 | 0.026600  | -0.97211  | 0.99870   | -11.292   | -61.292 | 0.070900  | -12.929 | 0.086200   | -17.914 |
| 13.192 | 0.11799   | -0.48097  | 0.59895   | -0.62625  | -56.262 | 0.065100  | -12.935 | 0.080200   | -17.920 |
| 13.499 | 0.089000  | -0.060100 | 0.14913   | -0.20216  | -52.022 | 0.048500  | -12.951 | 0.093600   | -17.906 |
| 13.806 | -0.26462  | -0.034400 | -0.23019  | -0.15669  | -51.567 | 0.011100  | -12.989 | 0.11119    | -17.889 |
| 14.113 | -10.154   | -0.55597  | -0.45942  | -0.61652  | -56.165 | -0.049400 | -13.049 | 0.10994    | -17.890 |
| 14.419 | -20.020   | -14.832   | -0.51884  | -14.289   | -64.289 | -0.12502  | -13.125 | 0.070800   | -17.929 |
| 14.726 | -28.340   | -23.903   | -0.44374  | -21.792   | -71.792 | -0.20136  | -13.201 | -0.0096900 | -18.010 |
| 15.033 | -30.205   | -27.194   | -0.30113  | -23.404   | -73.404 | -0.26453  | -13.265 | -0.11452   | -18.115 |
| 15.340 | -21.835   | -20.239   | -0.15960  | -15.025   | -65.025 | -0.30876  | -13.309 | -0.21257   | -18.213 |
| 15.647 | -0.26490  | -0.19985  | -0.065000 | 0.41294   | -45.871 | -0.33989  | -13.340 | -0.27291   | -18.273 |
| 15.953 | 23.694    | 24.000    | -0.030600 | 30.532    | -19.468 | -0.37221  | -13.372 | -0.28098   | -18.281 |
| 16.260 | 49.945    | 50.362    | -0.041700 | 57.035    | 0.70347 | -0.41927  | -13.419 | -0.24800   | -18.248 |
| 16.567 | 67.533    | 68.249    | -0.071500 | 75.146    | 25.146  | -0.48228  | -13.482 | -0.20749   | -18.207 |
| 16.874 | 69.683    | 70.652    | -0.096900 | 78.070    | 28.070  | -0.54221  | -13.542 | -0.19958   | -18.200 |
| 17.181 | 54.147    | 55.229    | -0.10816  | 63.333    | 13.333  | -0.56061  | -13.561 | -0.24981   | -18.250 |
| 17.487 | 24.399    | 25.492    | -0.10928  | 33.932    | -16.068 | -0.49083  | -13.491 | -0.35321   | -18.353 |
| 17.794 | -11.305   | -10.198   | -0.11067  | -0.25012  | -52.501 | -0.29697  | -13.297 | -0.47269   | -18.473 |
| 18.101 | -42.713   | -41.516   | -0.11977  | -36.240   | -86.240 | 0.026600  | -12.973 | -0.55414   | -18.554 |
| 18.408 | -61.182   | -59.829   | -0.13528  | -58.742   | -10.874 | 0.44336   | -12.557 | -0.55207   | -18.552 |
| 18.715 | -62.662   | -61.183   | -0.14793  | -65.422   | -11.542 | 0.87714   | -12.123 | -0.45322   | -18.453 |
| 19.021 | -48.919   | -47.454   | -0.14653  | -56.899   | -10.690 | 12.296    | -11.770 | -0.28517   | -18.285 |
| 19.328 | -26.503   | -25.248   | -0.12556  | -38.302   | -88.302 | 14.089    | -11.591 | -0.10348   | -18.103 |
| 19.635 | -0.39606  | -0.30662  | -0.089400 | -17.036   | -67.036 | 13.585    | -11.641 | 0.038500   | -17.962 |
| 19.942 | 11.547    | 12.058    | -0.051100 | 0.0050200 | -49.950 | 10.779    | -11.922 | 0.12287    | -17.877 |
| 20.249 | 16.817    | 17.074    | -0.025600 | 0.89663   | -41.034 | 0.62505   | -12.375 | 0.18568    | -17.814 |
| 20.555 | 13.367    | 13.587    | -0.022000 | 0.95119   | -40.488 | 0.10031   | -12.900 | 0.30719    | -17.693 |
| 20.862 | 0.61707   | 0.65509   | -0.038000 | 0.46408   | -45.359 | -0.38261  | -13.383 | 0.57361    | -17.426 |

|        |           |           |           |           |         |           |         |           |         |
|--------|-----------|-----------|-----------|-----------|---------|-----------|---------|-----------|---------|
| 21.169 | 0.10334   | 0.16398   | -0.060600 | -0.13057  | -51.306 | -0.72956  | -13.730 | 10.241    | -16.976 |
| 21.476 | 0.18077   | 0.25262   | -0.071800 | -0.46392  | -54.639 | -0.89087  | -13.891 | 16.074    | -16.393 |
| 21.783 | 0.86786   | 0.92501   | -0.057100 | -0.37590  | -53.759 | -0.87041  | -13.870 | 21.713    | -15.829 |
| 22.089 | 18.219    | 18.344    | -0.012500 | 0.053500  | -49.465 | -0.71704  | -13.717 | 24.979    | -15.502 |
| 22.396 | 25.112    | 24.575    | 0.053800  | 0.58344   | -44.166 | -0.50294  | -13.503 | 23.770    | -15.623 |
| 22.703 | 24.719    | 23.471    | 0.12474   | 0.95184   | -40.482 | -0.29758  | -13.298 | 16.929    | -16.307 |
| 23.010 | 15.303    | 13.476    | 0.18270   | 10.049    | -39.951 | -0.14713  | -13.147 | 0.48986   | -17.510 |
| 23.317 | -0.10426  | -0.32089  | 0.21663   | 0.75821   | -42.418 | -0.065500 | -13.066 | -10.136   | -19.014 |
| 23.623 | -19.159   | -21.424   | 0.22650   | 0.37025   | -46.298 | -0.038600 | -13.039 | -24.741   | -20.474 |
| 23.930 | -32.892   | -35.113   | 0.22205   | 0.049300  | -49.507 | -0.037600 | -13.038 | -35.229   | -21.523 |
| 24.237 | -37.546   | -39.718   | 0.21722   | -0.053700 | -50.537 | -0.034800 | -13.035 | -38.833   | -21.883 |
| 24.544 | -31.677   | -33.908   | 0.22304   | 0.086400  | -49.136 | -0.015100 | -13.015 | -34.621   | -21.462 |
| 24.850 | -17.517   | -19.940   | 0.24228   | 0.36727   | -46.327 | 0.020700  | -12.979 | -23.820   | -20.382 |
| 25.157 | 0.0072200 | -0.26098  | 0.26820   | 0.62101   | -43.790 | 0.060500  | -12.939 | -0.94249  | -18.942 |
| 25.464 | 15.581    | 12.704    | 0.28771   | 0.70257   | -42.974 | 0.089800  | -12.910 | 0.47808   | -17.522 |
| 25.771 | 24.893    | 22.022    | 0.28704   | 0.56040   | -44.396 | 0.099900  | -12.900 | 15.419    | -16.458 |
| 26.078 | 26.563    | 23.990    | 0.25730   | 0.25588   | -47.441 | 0.092300  | -12.908 | 20.508    | -15.949 |
| 26.384 | 21.909    | 19.933    | 0.19759   | -0.074100 | -50.741 | 0.076500  | -12.924 | 19.908    | -16.009 |
| 26.691 | 14.020    | 12.873    | 0.11473   | -0.28868  | -52.887 | 0.064400  | -12.936 | 15.115    | -16.488 |
| 26.998 | 0.62489   | 0.60473   | 0.020200  | -0.31222  | -53.122 | 0.064000  | -12.936 | 0.85297   | -17.147 |
| 27.305 | 0.087400  | 0.16143   | -0.074000 | -0.16607  | -51.661 | 0.075300  | -12.925 | 0.25220   | -17.748 |
| 27.612 | -0.15236  | 0.0061000 | -0.15846  | 0.048700  | -49.513 | 0.091300  | -12.909 | -0.13399  | -18.134 |
| 27.918 | -0.18350  | 0.044300  | -0.22782  | 0.20675   | -47.933 | 0.10205   | -12.898 | -0.26447  | -18.264 |
| 28.225 | -0.15951  | 0.12097   | -0.28048  | 0.22143   | -47.786 | 0.099700  | -12.900 | -0.20019  | -18.200 |
| 28.532 | -0.20400  | 0.11304   | -0.31703  | 0.085000  | -49.150 | 0.083000  | -12.917 | -0.055000 | -18.055 |
| 28.839 | -0.35108  | -0.012200 | -0.33893  | -0.13333  | -51.333 | 0.057200  | -12.943 | 0.064000  | -17.936 |
| 29.146 | -0.54355  | -0.19588  | -0.34767  | -0.32697  | -53.270 | 0.031500  | -12.969 | 0.099600  | -17.900 |
| 29.452 | -0.68036  | -0.33557  | -0.34479  | -0.40733  | -54.073 | 0.014400  | -12.986 | 0.057400  | -17.943 |
| 29.759 | -0.68200  | -0.35004  | -0.33197  | -0.34665  | -53.467 | 0.0094200 | -12.991 | -0.012800 | -18.013 |
| 30.066 | -0.53731  | -0.22635  | -0.31096  | -0.18778  | -51.878 | 0.014100  | -12.986 | -0.052700 | -18.053 |
| 30.373 | -0.30883  | -0.025700 | -0.28314  | -0.018200 | -50.182 | 0.021600  | -12.978 | -0.029100 | -18.029 |
| 30.680 | -0.097700 | 0.15106   | -0.24880  | 0.076600  | -49.234 | 0.024300  | -12.976 | 0.050200  | -17.950 |
| 30.986 | 0.0100000 | 0.21689   | -0.20688  | 0.055400  | -49.446 | 0.017800  | -12.982 | 0.14371   | -17.856 |
| 31.293 | -0.013200 | 0.14222   | -0.15544  | -0.060600 | -50.606 | 0.0027700 | -12.997 | 0.20005   | -17.800 |
| 31.600 | -0.12616  | -0.033300 | -0.092900 | -0.20249  | -52.025 | -0.015800 | -13.016 | 0.18496   | -17.815 |

|        |            |            |           |             |         |            |         |            |         |
|--------|------------|------------|-----------|-------------|---------|------------|---------|------------|---------|
| 31.907 | -0.24407   | -0.22469   | -0.019400 | -0.29146    | -52.915 | -0.031200  | -13.031 | 0.097900   | -17.902 |
| 32.214 | -0.28488   | -0.34644   | 0.061600  | -0.27902    | -52.790 | -0.038500  | -13.038 | -0.028900  | -18.029 |
| 32.520 | -0.21137   | -0.35441   | 0.14304   | -0.16994    | -51.699 | -0.037100  | -13.037 | -0.14740   | -18.147 |
| 32.827 | -0.048100  | -0.26361   | 0.21551   | -0.017000   | -50.170 | -0.030200  | -13.030 | -0.21650   | -18.216 |
| 33.134 | 0.13385    | -0.13486   | 0.26871   | 0.10833     | -48.917 | -0.023300  | -13.023 | -0.21990   | -18.220 |
| 33.441 | 0.25494    | -0.039400  | 0.29432   | 0.15241     | -48.476 | -0.021100  | -13.021 | -0.17066   | -18.171 |
| 33.748 | 0.26738    | -0.021100  | 0.28849   | 0.10574     | -48.943 | -0.025300  | -13.025 | -0.10155   | -18.102 |
| 34.054 | 0.17765    | -0.076100  | 0.25377   | 0.0049500   | -49.950 | -0.033600  | -13.034 | -0.047400  | -18.047 |
| 34.361 | 0.041100   | -0.15862   | 0.19968   | -0.088300   | -50.883 | -0.041700  | -13.042 | -0.028700  | -18.029 |
| 34.668 | -0.067200  | -0.20855   | 0.14137   | -0.11994    | -51.199 | -0.044900  | -13.045 | -0.043700  | -18.044 |
| 34.975 | -0.088900  | -0.18515   | 0.096300  | -0.070700   | -50.707 | -0.041200  | -13.041 | -0.073200  | -18.073 |
| 35.282 | -0.0092900 | -0.088500  | 0.079300  | 0.035800    | -49.642 | -0.031800  | -13.032 | -0.092500  | -18.093 |
| 35.588 | 0.13826    | 0.041300   | 0.097000  | 0.14748     | -48.525 | -0.020500  | -13.021 | -0.085700  | -18.086 |
| 35.895 | 0.29057    | 0.14641    | 0.14416   | 0.21102     | -47.890 | -0.011600  | -13.012 | -0.053000  | -18.053 |
| 36.202 | 0.38450    | 0.18178    | 0.20272   | 0.19933     | -48.007 | -0.0077000 | -13.008 | -0.0098500 | -18.010 |
| 36.509 | 0.38406    | 0.13801    | 0.24604   | 0.12381     | -48.762 | -0.0086700 | -13.009 | 0.022900   | -17.977 |
| 36.816 | 0.29254    | 0.045300   | 0.24724   | 0.026700    | -49.733 | -0.011800  | -13.012 | 0.030400   | -17.970 |
| 37.122 | 0.14633    | -0.043200  | 0.18958   | -0.041800   | -50.418 | -0.013300  | -13.013 | 0.011900   | -17.988 |
| 37.429 | -0.0043000 | -0.079200  | 0.074900  | -0.049200   | -50.492 | -0.010600  | -13.011 | -0.019400  | -18.019 |
| 37.736 | -0.11674   | -0.043200  | -0.073500 | 0.0036800   | -49.963 | -0.0032600 | -13.003 | -0.043600  | -18.044 |
| 38.043 | -0.17013   | 0.046900   | -0.21699  | 0.084800    | -49.152 | 0.0066100  | -12.993 | -0.044500  | -18.045 |
| 38.350 | -0.16744   | 0.14616    | -0.31361  | 0.14880     | -48.512 | 0.015600   | -12.984 | -0.018200  | -18.018 |
| 38.656 | -0.12765   | 0.20684    | -0.33449  | 0.16068     | -48.393 | 0.020700   | -12.979 | 0.025500   | -17.975 |
| 38.963 | -0.074100  | 0.20200    | -0.27614  | 0.11305     | -48.869 | 0.020900   | -12.979 | 0.068000   | -17.932 |
| 39.270 | -0.025700  | 0.13809    | -0.16381  | 0.028700    | -49.713 | 0.017500   | -12.983 | 0.091900   | -17.908 |
| 39.577 | 0.0066500  | 0.049800   | -0.043200 | -0.052300   | -50.523 | 0.013400   | -12.987 | 0.088800   | -17.911 |
| 39.883 | 0.018500   | -0.018800  | 0.037400  | -0.093700   | -50.937 | 0.011400   | -12.989 | 0.063500   | -17.937 |
| 40.190 | 0.0096700  | -0.037200  | 0.046900  | -0.080900   | -50.809 | 0.013000   | -12.987 | 0.030800   | -17.969 |
| 40.497 | -0.016900  | -0.0025800 | -0.014300 | -0.027400   | -50.274 | 0.017500   | -12.983 | 0.0073300  | -17.993 |
| 40.804 | -0.053400  | 0.060100   | -0.11352  | 0.033600    | -49.664 | 0.022700   | -12.977 | 0.0037500  | -17.996 |
| 41.111 | -0.086900  | 0.11238    | -0.19932  | 0.067100    | -49.329 | 0.025800   | -12.974 | 0.019500   | -17.980 |
| 41.417 | -0.10157   | 0.12284    | -0.22441  | 0.053700    | -49.463 | 0.025200   | -12.975 | 0.044000   | -17.956 |
| 41.724 | -0.085600  | 0.082600   | -0.16821  | -0.00080900 | -50.008 | 0.020900   | -12.979 | 0.062600   | -17.937 |
| 42.031 | -0.039500  | 0.0090000  | -0.048500 | -0.069800   | -50.698 | 0.014600   | -12.985 | 0.064200   | -17.936 |
| 42.338 | 0.019700   | -0.064600  | 0.084300  | -0.12021    | -51.202 | 0.0088200  | -12.991 | 0.046800   | -17.953 |

|        |            |            |             |            |         |            |         |             |         |
|--------|------------|------------|-------------|------------|---------|------------|---------|-------------|---------|
| 42.645 | 0.061900   | -0.10605   | 0.16796     | -0.12932   | -51.293 | 0.0055200  | -12.994 | 0.017700    | -17.982 |
| 42.951 | 0.057300   | -0.10067   | 0.15798     | -0.095600  | -50.956 | 0.0051100  | -12.995 | -0.010200   | -18.010 |
| 43.258 | -0.0074600 | -0.057500  | 0.050000    | -0.038400  | -50.384 | 0.0064500  | -12.994 | -0.025500   | -18.025 |
| 43.565 | -0.11685   | -0.0033300 | -0.11353    | 0.013100   | -49.869 | 0.0075100  | -12.992 | -0.023900   | -18.024 |
| 43.872 | -0.22678   | 0.031500   | -0.25831    | 0.034600   | -49.654 | 0.0064400  | -12.994 | -0.0094900  | -18.009 |
| 44.179 | -0.28000   | 0.028900   | -0.30888    | 0.019000   | -49.810 | 0.0025900  | -12.997 | 0.0072900   | -17.993 |
| 44.485 | -0.23184   | -0.0090700 | -0.22278    | -0.021400  | -50.214 | -0.0032300 | -13.003 | 0.015600    | -17.984 |
| 44.792 | -0.074700  | -0.062000  | -0.012700   | -0.062500  | -50.625 | -0.0091500 | -13.009 | 0.0096400   | -17.990 |
| 45.099 | 0.15119    | -0.10284   | 0.25402     | -0.080900  | -50.809 | -0.013200  | -13.013 | -0.0087400  | -18.009 |
| 45.406 | 0.36786    | -0.11169   | 0.47955     | -0.066000  | -50.660 | -0.014400  | -13.014 | -0.031300   | -18.031 |
| 45.713 | 0.48917    | -0.085500  | 0.57468     | -0.024700  | -50.247 | -0.013000  | -13.013 | -0.047800   | -18.048 |
| 46.019 | 0.45747    | -0.038600  | 0.49603     | 0.023100   | -49.769 | -0.010400  | -13.010 | -0.051300   | -18.051 |
| 46.326 | 0.27139    | 0.0057300  | 0.26565     | 0.055500   | -49.445 | -0.0082600 | -13.008 | -0.041500   | -18.042 |
| 46.633 | -0.0089400 | 0.027100   | -0.036000   | 0.059100   | -49.409 | -0.0079200 | -13.008 | -0.024100   | -18.024 |
| 46.940 | -0.28331   | 0.018400   | -0.30166    | 0.035800   | -49.642 | -0.0094900 | -13.009 | -0.0079600  | -18.008 |
| 47.247 | -0.45130   | -0.011900  | -0.43935    | 0.00054300 | -49.995 | -0.012000  | -13.012 | -0.00046200 | -18.000 |
| 47.553 | -0.45365   | -0.044800  | -0.40886    | -0.026900  | -50.269 | -0.014100  | -13.014 | -0.0038200  | -18.004 |
| 47.860 | -0.29684   | -0.061100  | -0.23577    | -0.032200  | -50.322 | -0.014400  | -13.014 | -0.014500   | -18.014 |
| 48.167 | -0.049600  | -0.051100  | 0.0015800   | -0.013200  | -50.132 | -0.012600  | -13.013 | -0.025400   | -18.025 |
| 48.474 | 0.18732    | -0.019100  | 0.20646     | 0.019900   | -49.801 | -0.0093500 | -13.009 | -0.029700   | -18.030 |
| 48.781 | 0.32399    | 0.019900   | 0.30406     | 0.050300   | -49.497 | -0.0059000 | -13.006 | -0.024400   | -18.024 |
| 49.087 | 0.31889    | 0.048500   | 0.27040     | 0.063700   | -49.363 | -0.0034200 | -13.003 | -0.011800   | -18.012 |
| 49.394 | 0.19325    | 0.055200   | 0.13801     | 0.055100   | -49.449 | -0.0024700 | -13.002 | 0.0025800   | -17.997 |
| 49.701 | 0.017500   | 0.040300   | -0.022800   | 0.030800   | -49.692 | -0.0027300 | -13.003 | 0.012200    | -17.988 |
| 50.008 | -0.12343   | 0.014400   | -0.13783    | 0.0041300  | -49.959 | -0.0032700 | -13.003 | 0.013500    | -17.986 |
| 50.315 | -0.16921   | -0.0075100 | -0.16170    | -0.011900  | -50.119 | -0.0030200 | -13.003 | 0.0073600   | -17.993 |
| 50.621 | -0.10949   | -0.013900  | -0.095600   | -0.010800  | -50.108 | -0.0014000 | -13.001 | -0.0017100  | -18.002 |
| 50.928 | 0.015200   | -0.0022500 | 0.017500    | 0.0041300  | -49.959 | 0.0014300  | -12.999 | -0.0078100  | -18.008 |
| 51.235 | 0.13648    | 0.020400   | 0.11608     | 0.022600   | -49.774 | 0.0046500  | -12.995 | -0.0069000  | -18.007 |
| 51.542 | 0.19202    | 0.041800   | 0.15024     | 0.033300   | -49.667 | 0.0072400  | -12.993 | 0.0012800   | -17.999 |
| 51.849 | 0.15491    | 0.051000   | 0.10388     | 0.029300   | -49.707 | 0.0084500  | -12.992 | 0.013300    | -17.987 |
| 52.155 | 0.043700   | 0.044100   | -0.00046800 | 0.012200   | -49.878 | 0.0081900  | -12.992 | 0.023700    | -17.976 |
| 52.462 | -0.090000  | 0.025400   | -0.11544    | -0.0098200 | -50.098 | 0.0069900  | -12.993 | 0.028200    | -17.972 |
| 52.769 | -0.18865   | 0.0047200  | -0.19337    | -0.026400  | -50.264 | 0.0057300  | -12.994 | 0.025400    | -17.975 |
| 53.076 | -0.21668   | -0.0079300 | -0.20875    | -0.030300  | -50.303 | 0.0051600  | -12.995 | 0.017200    | -17.983 |

|        |            |            |             |             |         |             |         |            |         |
|--------|------------|------------|-------------|-------------|---------|-------------|---------|------------|---------|
| 53.383 | -0.17534   | -0.0075100 | -0.16783    | -0.021200   | -50.212 | 0.0055800   | -12.994 | 0.0081200  | -17.992 |
| 53.689 | -0.097400  | 0.0038400  | -0.10122    | -0.0052700  | -50.053 | 0.0066800   | -12.993 | 0.0024400  | -17.998 |
| 53.996 | -0.026100  | 0.018500   | -0.044600   | 0.0083600   | -49.916 | 0.0078000   | -12.992 | 0.0023000  | -17.998 |
| 54.303 | 0.0095100  | 0.027400   | -0.017900   | 0.012300    | -49.877 | 0.0082500   | -12.992 | 0.0068200  | -17.993 |
| 54.610 | 0.010200   | 0.025200   | -0.015000   | 0.0047300   | -49.953 | 0.0076700   | -12.992 | 0.012800   | -17.987 |
| 54.917 | 0.0034400  | 0.012100   | -0.0087100  | -0.010400   | -50.104 | 0.0061800   | -12.994 | 0.016300   | -17.984 |
| 55.223 | 0.024800   | -0.0058400 | 0.030700    | -0.025300   | -50.253 | 0.0042600   | -12.996 | 0.015200   | -17.985 |
| 55.530 | 0.093100   | -0.020900  | 0.11398     | -0.032900   | -50.329 | 0.0025200   | -12.997 | 0.0095600  | -17.990 |
| 55.837 | 0.19378    | -0.026900  | 0.22065     | -0.030000   | -50.300 | 0.0013500   | -12.999 | 0.0017900  | -17.998 |
| 56.144 | 0.28051    | -0.022500  | 0.30305     | -0.018600   | -50.186 | 0.00078800  | -12.999 | -0.0047700 | -18.005 |
| 56.450 | 0.29594    | -0.011500  | 0.30740     | -0.0043600  | -50.044 | 0.00055200  | -12.999 | -0.0076500 | -18.008 |
| 56.757 | 0.20185    | 2.48E-01   | 0.20183     | 0.0062300   | -49.938 | 0.00021600  | -13.000 | -0.0064200 | -18.006 |
| 57.064 | 0.0040200  | 0.0061700  | -0.0021500  | 0.0094300   | -49.906 | -0.00052700 | -13.001 | -0.0027300 | -18.003 |
| 57.371 | -0.24188   | 0.0045200  | -0.24639    | 0.0055500   | -49.945 | -0.0017100  | -13.002 | 0.00067600 | -17.999 |
| 57.678 | -0.44807   | -0.0033100 | -0.44476    | -0.0016200  | -50.016 | -0.0030800  | -13.003 | 0.0013900  | -17.999 |
| 57.984 | -0.52993   | -0.012800  | -0.51709    | -0.0071800  | -50.072 | -0.0042600  | -13.004 | -0.0014000 | -18.001 |
| 58.291 | -0.44321   | -0.019300  | -0.42391    | -0.0077500  | -50.078 | -0.0049100  | -13.005 | -0.0066300 | -18.007 |
| 58.598 | -0.20635   | -0.019900  | -0.18642    | -0.0029900  | -50.030 | -0.0049400  | -13.005 | -0.012000  | -18.012 |
| 58.905 | 0.10309    | -0.015200  | 0.11824     | 0.0045500   | -49.955 | -0.0045000  | -13.005 | -0.015200  | -18.015 |
| 59.212 | 0.37738    | -0.0078700 | 0.38525     | 0.011100    | -49.889 | -0.0039200  | -13.004 | -0.015000  | -18.015 |
| 59.518 | 0.52097    | -0.0017800 | 0.52276     | 0.013700    | -49.863 | -0.0034900  | -13.003 | -0.012000  | -18.012 |
| 59.825 | 0.48815    | 0.00055500 | 0.48760     | 0.011700    | -49.883 | -0.0033800  | -13.003 | -0.0077200 | -18.008 |
| 60.132 | 0.29995    | -0.0011600 | 0.30111     | 0.0067000   | -49.933 | -0.0035200  | -13.004 | -0.0043400 | -18.004 |
| 60.439 | 0.033500   | -0.0051600 | 0.038700    | 0.0017100   | -49.983 | -0.0037000  | -13.004 | -0.0031700 | -18.003 |
| 60.746 | -0.21080   | -0.0087300 | -0.20207    | -0.00081700 | -50.008 | -0.0036600  | -13.004 | -0.0042600 | -18.004 |
| 61.052 | -0.35013   | -0.0097200 | -0.34041    | -1.67E-01   | -50.000 | -0.0032600  | -13.003 | -0.0064400 | -18.006 |
| 61.359 | -0.34958   | -0.0074500 | -0.34212    | 0.0031100   | -49.969 | -0.0025200  | -13.003 | -0.0080400 | -18.008 |
| 61.666 | -0.23091   | -0.0029300 | -0.22799    | 0.0064500   | -49.935 | -0.0016100  | -13.002 | -0.0077700 | -18.008 |
| 61.973 | -0.057100  | 0.0019600  | -0.059000   | 0.0080300   | -49.920 | -0.00072500 | -13.001 | -0.0053400 | -18.005 |
| 62.280 | 0.098600   | 0.0054000  | 0.093200    | 0.0069800   | -49.930 | -4.74E-01   | -13.000 | -0.0015300 | -18.002 |
| 62.586 | 0.18366    | 0.0065100  | 0.17715     | 0.0038300   | -49.962 | 0.00037700  | -13.000 | 0.0023000  | -17.998 |
| 62.893 | 0.18481    | 0.0055300  | 0.17928     | 2.88E-02    | -50.000 | 0.00061700  | -12.999 | 0.0049100  | -17.995 |
| 63.200 | 0.12629    | 0.0034900  | 0.12281     | -0.0030500  | -50.030 | 0.00080400  | -12.999 | 0.0057300  | -17.994 |
| 63.507 | 0.051800   | 0.0016300  | 0.050200    | -0.0045400  | -50.045 | 0.0010500   | -12.999 | 0.0051200  | -17.995 |
| 63.814 | 0.00029800 | 0.00081100 | -0.00051200 | -0.0046200  | -50.046 | 0.0014100   | -12.999 | 0.0040200  | -17.996 |

|        |            |            |            |             |         |             |         |             |         |
|--------|------------|------------|------------|-------------|---------|-------------|---------|-------------|---------|
| 64.120 | -0.012400  | 0.0012700  | -0.013700  | -0.0040000  | -50.040 | 0.0018300   | -12.998 | 0.0034300   | -17.997 |
| 64.427 | 0.0028900  | 0.0027100  | 0.00018100 | -0.0034200  | -50.034 | 0.0022200   | -12.998 | 0.0039100   | -17.996 |
| 64.734 | 0.019200   | 0.0045900  | 0.014600   | -0.0031900  | -50.032 | 0.0024800   | -12.998 | 0.0053000   | -17.995 |
| 65.041 | 0.011700   | 0.0063500  | 0.0053900  | -0.0031600  | -50.032 | 0.0025600   | -12.997 | 0.0069500   | -17.993 |
| 65.348 | -0.026900  | 0.0075500  | -0.034500  | -0.0029400  | -50.029 | 0.0024700   | -12.998 | 0.0080300   | -17.992 |
| 65.654 | -0.082400  | 0.0079200  | -0.090300  | -0.0023200  | -50.023 | 0.0022300   | -12.998 | 0.0080200   | -17.992 |
| 65.961 | -0.12706   | 0.0073500  | -0.13441   | -0.0014700  | -50.015 | 0.0019100   | -12.998 | 0.0069000   | -17.993 |
| 66.268 | -0.13594   | 0.0059200  | -0.14186   | -0.00079400 | -50.008 | 0.0015700   | -12.998 | 0.0051500   | -17.995 |
| 66.575 | -0.10138   | 0.0040000  | -0.10538   | -0.00062900 | -50.006 | 0.0012400   | -12.999 | 0.0033900   | -17.997 |
| 66.882 | -0.037900  | 0.0021500  | -0.040100  | -0.00090400 | -50.009 | 0.00093000  | -12.999 | 0.0021200   | -17.998 |
| 67.188 | 0.025200   | 0.0010200  | 0.024200   | -0.0011200  | -50.011 | 0.00064600  | -12.999 | 0.0014900   | -17.999 |
| 67.495 | 0.060200   | 0.0010100  | 0.059200   | -0.00065900 | -50.007 | 0.00039100  | -13.000 | 0.0012800   | -17.999 |
| 67.802 | 0.055800   | 0.0020100  | 0.053800   | 0.00078300  | -49.992 | 0.00015800  | -13.000 | 0.0010700   | -17.999 |
| 68.109 | 0.024100   | 0.0033300  | 0.020800   | 0.0028600   | -49.971 | -6,17E-01   | -13.000 | 0.00052900  | -17.999 |
| 68.416 | -0.0057200 | 0.0039500  | -0.0096700 | 0.0046700   | -49.953 | -0.00028400 | -13.000 | -0.00044000 | -18.000 |
| 68.722 | -0.0044900 | 0.0029900  | -0.0074900 | 0.0051800   | -49.948 | -0.00051600 | -13.001 | -0.0016700  | -18.002 |
| 69.029 | 0.039600   | 0.00026400 | 0.039300   | 0.0038700   | -49.961 | -0.00075000 | -13.001 | -0.0028600  | -18.003 |
| 69.336 | 0.11141    | -0.0035500 | 0.11496    | 0.0011200   | -49.989 | -0.00095200 | -13.001 | -0.0037200  | -18.004 |
| 69.643 | 0.17383    | -0.0070600 | 0.18089    | -0.0018600  | -50.019 | -0.0010700  | -13.001 | -0.0041300  | -18.004 |
| 69.950 | 0.18554    | -0.0088300 | 0.19437    | -0.0035800  | -50.036 | -0.0010800  | -13.001 | -0.0041700  | -18.004 |
| 70.256 | 0.12320    | -0.0080700 | 0.13127    | -0.0031100  | -50.031 | -0.00095900 | -13.001 | -0.0040100  | -18.004 |
| 70.563 | -0.0033100 | -0.0051200 | 0.0018200  | -0.00054200 | -50.005 | -0.00075800 | -13.001 | -0.0038200  | -18.004 |
| 70.870 | -0.15101   | -0.0013600 | -0.14965   | 0.0028900   | -49.971 | -0.00055800 | -13.001 | -0.0036900  | -18.004 |
| 71.177 | -0.26082   | 0.0014500  | -0.26227   | 0.0054400   | -49.946 | -0.00044500 | -13.000 | -0.0035500  | -18.004 |
| 71.484 | -0.28393   | 0.0020000  | -0.28593   | 0.0057700   | -49.942 | -0.00046500 | -13.000 | -0.0033100  | -18.003 |
| 71.790 | -0.20544   | 0.00013800 | -0.20557   | 0.0036100   | -49.964 | -0.00060000 | -13.001 | -0.0028700  | -18.003 |
| 72.097 | -0.053400  | -0.0030100 | -0.050400  | -7,75E-02   | -50.000 | -0.00076200 | -13.001 | -0.0022400  | -18.002 |
| 72.404 | 0.11187    | -0.0056200 | 0.11749    | -0.0033000  | -50.033 | -0.00083800 | -13.001 | -0.0014800  | -18.001 |
| 72.711 | 0.22360    | -0.0061000 | 0.22970    | -0.0046400  | -50.046 | -0.00073700 | -13.001 | -0.00071600 | -18.001 |
| 73.017 | 0.23863    | -0.0039300 | 0.24256    | -0.0034600  | -50.035 | -0.00044000 | -13.000 | -3,03E-01   | -18.000 |
| 73.324 | 0.15660    | 1,32E-02   | 0.15660    | -0.00051300 | -50.005 | -1,35E-01   | -13.000 | 0.00052800  | -17.999 |
| 73.631 | 0.019800   | 0.0038500  | 0.015900   | 0.0024700   | -49.975 | 0.00041700  | -13.000 | 0.00095800  | -17.999 |
| 73.938 | -0.10717   | 0.0057400  | -0.11291   | 0.0037400   | -49.963 | 0.00072400  | -12.999 | 0.0012700   | -17.999 |
| 74.245 | -0.16754   | 0.0047800  | -0.17232   | 0.0024500   | -49.976 | 0.00084200  | -12.999 | 0.0014900   | -17.999 |
| 74.551 | -0.13911   | 0.0015100  | -0.14062   | -0.00087500 | -50.009 | 0.00078900  | -12.999 | 0.0016000   | -17.998 |

|        |           |             |           |             |         |             |         |             |         |
|--------|-----------|-------------|-----------|-------------|---------|-------------|---------|-------------|---------|
| 74.858 | -0.043700 | -0.0023000  | -0.041400 | -0.0045800  | -50.046 | 0.00066100  | -12.999 | 0.0016200   | -17.998 |
| 75.165 | 0.064800  | -0.0046000  | 0.069400  | -0.0068000  | -50.068 | 0.00057500  | -12.999 | 0.0016300   | -17.998 |
| 75.472 | 0.12777   | -0.0041000  | 0.13187   | -0.0064100  | -50.064 | 0.00061000  | -12.999 | 0.0017100   | -17.998 |
| 75.779 | 0.11170   | -0.00099000 | 0.11269   | -0.0036800  | -50.037 | 0.00076500  | -12.999 | 0.0019300   | -17.998 |
| 76.085 | 0.025400  | 0.0031600   | 0.022200  | -9,77E-01   | -50.001 | 0.00096000  | -12.999 | 0.0022900   | -17.998 |
| 76.392 | -0.084200 | 0.0061800   | -0.090400 | 0.0024100   | -49.976 | 0.0010800   | -12.999 | 0.0026900   | -17.997 |
| 76.699 | -0.15549  | 0.0064600   | -0.16194  | 0.0025300   | -49.975 | 0.0010200   | -12.999 | 0.0029000   | -17.997 |
| 77.006 | -0.14401  | 0.0037700   | -0.14777  | 0.00026500  | -49.997 | 0.00078000  | -12.999 | 0.0027200   | -17.997 |
| 77.313 | -0.046600 | -0.00058000 | -0.046000 | -0.0030300  | -50.030 | 0.00041700  | -13.000 | 0.0020300   | -17.998 |
| 77.619 | 0.094700  | -0.0043900  | 0.099100  | -0.0053700  | -50.054 | 4,92E-01    | -13.000 | 0.00093200  | -17.999 |
| 77.926 | 0.21059   | -0.0057300  | 0.21632   | -0.0052300  | -50.052 | -0.00021500 | -13.000 | -0.00029300 | -18.000 |
| 78.233 | 0.23831   | -0.0039100  | 0.24221   | -0.0023200  | -50.023 | -0.00033000 | -13.000 | -0.0012500  | -18.001 |
| 78.540 | 0.15261   | 0.00014800  | 0.15246   | 0.0021200   | -49.979 | -0.00033200 | -13.000 | -0.0016400  | -18.002 |
| 78.847 | -0.019100 | 0.0043600   | -0.023500 | 0.0060300   | -49.940 | -0.00031300 | -13.000 | -0.0013600  | -18.001 |
| 79.153 | -0.20664  | 0.0065600   | -0.21320  | 0.0075300   | -49.925 | -0.00036700 | -13.000 | -0.00060700 | -18.001 |
| 79.460 | -0.32759  | 0.0055800   | -0.33317  | 0.0059000   | -49.941 | -0.00053900 | -13.001 | 0.00022400  | -18.000 |
| 79.767 | -0.32474  | 0.0018900   | -0.32663  | 0.0019800   | -49.980 | -0.00079200 | -13.001 | 0.00069900  | -17.999 |
| 80.074 | -0.19294  | -0.0027200  | -0.19022  | -0.0022300  | -50.022 | -0.0010300  | -13.001 | 0.00054900  | -17.999 |
| 80.381 | 0.017400  | -0.0059700  | 0.023400  | -0.0046000  | -50.046 | -0.0011600  | -13.001 | -0.00020800 | -18.000 |
| 80.687 | 0.22214   | -0.0063000  | 0.22845   | -0.0039100  | -50.039 | -0.0011100  | -13.001 | -0.0012800  | -18.001 |
| 80.994 | 0.34033   | -0.0036200  | 0.34395   | -0.00045600 | -50.005 | -0.00092100 | -13.001 | -0.0022400  | -18.002 |
| 81.301 | 0.32972   | 0.00067300  | 0.32905   | 0.0041100   | -49.959 | -0.00068000 | -13.001 | -0.0027600  | -18.003 |
| 81.608 | 0.20408   | 0.0044100   | 0.19967   | 0.0076200   | -49.924 | -0.00050800 | -13.001 | -0.0027100  | -18.003 |
| 81.915 | 0.024900  | 0.0057500   | 0.019100  | 0.0084700   | -49.915 | -0.00048400 | -13.000 | -0.0022400  | -18.002 |
| 82.221 | -0.12834  | 0.0040800   | -0.13242  | 0.0063500   | -49.936 | -0.00060400 | -13.001 | -0.0016700  | -18.002 |
| 82.528 | -0.19477  | 0.00029800  | -0.19507  | 0.0023700   | -49.976 | -0.00078300 | -13.001 | -0.0012900  | -18.001 |
| 82.835 | -0.15889  | -0.0036900  | -0.15519  | -0.0015800  | -50.016 | -0.00089000 | -13.001 | -0.0012200  | -18.001 |
| 83.142 | -0.054700 | -0.0059600  | -0.048800 | -0.0038000  | -50.038 | -0.00081400 | -13.001 | -0.0013400  | -18.001 |
| 83.449 | 0.053500  | -0.0054700  | 0.058900  | -0.0036000  | -50.036 | -0.00052100 | -13.001 | -0.0013500  | -18.001 |
| 83.755 | 0.10399   | -0.0026100  | 0.10660   | -0.0015500  | -50.016 | -6,70E-01   | -13.000 | -0.00099700 | -18.001 |
| 84.062 | 0.068400  | 0.0011100   | 0.067300  | 0.00086300  | -49.991 | 0.00042600  | -13.000 | -0.00018000 | -18.000 |
| 84.369 | -0.035100 | 0.0038200   | -0.038900 | 0.0020700   | -49.979 | 0.00082500  | -12.999 | 0.00092800  | -17.999 |
| 84.676 | -0.15193  | 0.0042400   | -0.15617  | 0.0012200   | -49.988 | 0.0010500   | -12.999 | 0.0019700   | -17.998 |
| 84.983 | -0.21810  | 0.0022600   | -0.22036  | -0.0013900  | -50.014 | 0.0010800   | -12.999 | 0.0025600   | -17.997 |
| 85.289 | -0.19258  | -0.0010500  | -0.19153  | -0.0045600  | -50.046 | 0.0010100   | -12.999 | 0.0025000   | -17.997 |



|        |            |             |            |             |         |             |         |             |         |
|--------|------------|-------------|------------|-------------|---------|-------------|---------|-------------|---------|
| 85.596 | -0.077600  | -0.0040200  | -0.073600  | -0.0068100  | -50.068 | 0.00091300  | -12.999 | 0.0018800   | -17.998 |
| 85.903 | 0.081700   | -0.0052300  | 0.087000   | -0.0071300  | -50.071 | 0.00087800  | -12.999 | 0.0010200   | -17.999 |
| 86.210 | 0.21858    | -0.0041500  | 0.22273    | -0.0054400  | -50.054 | 0.00091800  | -12.999 | 0.00036500  | -18.000 |
| 86.517 | 0.27544    | -0.0013700  | 0.27681    | -0.0025800  | -50.026 | 0.00098900  | -12.999 | 0.00021900  | -18.000 |
| 86.823 | 0.23041    | 0.0018200   | 0.22859    | 0.00018200  | -49.998 | 0.0010100   | -12.999 | 0.00062900  | -17.999 |
| 87.130 | 0.10635    | 0.0040700   | 0.10228    | 0.0017900   | -49.982 | 0.00092500  | -12.999 | 0.0013500   | -17.999 |
| 87.437 | -0.041100  | 0.0046100   | -0.045700  | 0.0019100   | -49.981 | 0.00070900  | -12.999 | 0.0020000   | -17.998 |
| 87.744 | -0.14998   | 0.0035600   | -0.15354   | 0.00095700  | -49.990 | 0.00040900  | -13.000 | 0.0021900   | -17.998 |
| 88.050 | -0.18056   | 0.0017500   | -0.18231   | -0.00016600 | -50.002 | 0.00010800  | -13.000 | 0.0018100   | -17.998 |
| 88.357 | -0.13164   | 0.00024900  | -0.13189   | -0.00062700 | -50.006 | -0.00011100 | -13.000 | 0.00098600  | -17.999 |
| 88.664 | -0.038300  | -0.00021600 | -0.038100  | -8,57E-01   | -50.001 | -0.00020000 | -13.000 | 6,95E-01    | -18.000 |
| 88.971 | 0.047600   | 0.00043700  | 0.047200   | 0.0011800   | -49.988 | -0.00016900 | -13.000 | -0.00057000 | -18.001 |
| 89.278 | 0.083400   | 0.0016800   | 0.081700   | 0.0024700   | -49.975 | -7,21E-01   | -13.000 | -0.00072000 | -18.001 |
| 89.584 | 0.055900   | 0.0027000   | 0.053200   | 0.0031200   | -49.969 | 1,76E-01    | -13.000 | -0.00043000 | -18.000 |
| 89.891 | -0.014300  | 0.0028900   | -0.017100  | 0.0028200   | -49.972 | 4,50E-01    | -13.000 | 2,98E-01    | -18.000 |
| 90.198 | -0.085000  | 0.0021000   | -0.087100  | 0.0018000   | -49.982 | -7,06E-02   | -13.000 | 0.00031300  | -18.000 |
| 90.505 | -0.11541   | 0.00070500  | -0.11611   | 0.00064800  | -49.994 | -0.00011700 | -13.000 | 0.00017400  | -18.000 |
| 90.812 | -0.086400  | -0.00065300 | -0.085700  | -4,25E-02   | -50.000 | -0.00024200 | -13.000 | -0.00040700 | -18.000 |
| 91.118 | -0.010100  | -0.0014100  | -0.0086800 | 0.00015400  | -49.998 | -0.00034300 | -13.000 | -0.0012200  | -18.001 |
| 91.425 | 0.077100   | -0.0013700  | 0.078500   | 0.00098200  | -49.990 | -0.00040500 | -13.000 | -0.0019500  | -18.002 |
| 91.732 | 0.13346    | -0.00074400 | 0.13420    | 0.0019900   | -49.980 | -0.00043700 | -13.000 | -0.0022900  | -18.002 |
| 92.039 | 0.13312    | -2,89E-01   | 0.13315    | 0.0025900   | -49.974 | -0.00046200 | -13.000 | -0.0021600  | -18.002 |
| 92.346 | 0.078600   | 0.00029400  | 0.078300   | 0.0024300   | -49.976 | -0.00050100 | -13.001 | -0.0016400  | -18.002 |
| 92.652 | -0.0010800 | -8,34E-02   | -0.0010700 | 0.0015300   | -49.985 | -0.00055500 | -13.001 | -0.00098700 | -18.001 |
| 92.959 | -0.065700  | -0.00083000 | -0.064900  | 0.00023800  | -49.998 | -0.00060700 | -13.001 | -0.00046000 | -18.000 |
| 93.266 | -0.084500  | -0.0018100  | -0.082600  | -0.00098200 | -50.010 | -0.00062800 | -13.001 | -0.00020200 | -18.000 |
| 93.573 | -0.051700  | -0.0025500  | -0.049100  | -0.0017600  | -50.018 | -0.00059500 | -13.001 | -0.00018800 | -18.000 |
| 93.880 | 0.010600   | -0.0027800  | 0.013300   | -0.0020100  | -50.020 | -0.00050400 | -13.001 | -0.00026600 | -18.000 |
| 94.186 | 0.063900   | -0.0025000  | 0.066400   | -0.0018700  | -50.019 | -0.00037000 | -13.000 | -0.00026100 | -18.000 |
| 94.493 | 0.073800   | -0.0019400  | 0.075700   | -0.0016300  | -50.016 | -0.00022600 | -13.000 | -8,45E-01   | -18.000 |
| 94.800 | 0.027800   | -0.0013900  | 0.029100   | -0.0015000  | -50.015 | -0.00010400 | -13.000 | 0.00021600  | -18.000 |
| 95.107 | -0.056700  | -0.0011000  | -0.055600  | -0.0015600  | -50.016 | -2,57E-01   | -13.000 | 0.00048600  | -18.000 |
| 95.414 | -0.13916   | -0.0011700  | -0.13800   | -0.0017300  | -50.017 | 6,92E-02    | -13.000 | 0.00055800  | -17.999 |
| 95.720 | -0.17511   | -0.0014800  | -0.17363   | -0.0018500  | -50.019 | 7,31E-02    | -13.000 | 0.00035800  | -18.000 |
| 96.027 | -0.13752   | -0.0018500  | -0.13567   | -0.0018000  | -50.018 | -3,43E-02   | -13.000 | -4,11E-01   | -18.000 |

|        |           |             |           |             |         |            |         |             |         |
|--------|-----------|-------------|-----------|-------------|---------|------------|---------|-------------|---------|
| 96.334 | -0.031200 | -0.0020200  | -0.029200 | -0.0015700  | -50.016 | -6,26E-02  | -13.000 | -0.00044100 | -18.000 |
| 96.641 | 0.10686   | -0.0018300  | 0.10870   | -0.0012400  | -50.012 | 9,39E-02   | -13.000 | -0.00060900 | -18.001 |
| 96.948 | 0.22223   | -0.0012200  | 0.22345   | -0.00086500 | -50.009 | 4,43E-01   | -13.000 | -0.00039600 | -18.000 |
| 97.254 | 0.26571   | -0.00021800 | 0.26592   | -0.00050000 | -50.005 | 9,25E-01   | -13.000 | 0.00019000  | -18.000 |
| 97.561 | 0.21470   | 0.0010000   | 0.21369   | -0.00011900 | -50.001 | 0.00014500 | -13.000 | 0.00097700  | -17.999 |
| 97.868 | 0.083700  | 0.0022100   | 0.081500  | 0.00031200  | -49.997 | 0.00019500 | -13.000 | 0.0017000   | -17.998 |
| 98.175 | -0.080600 | 0.0031200   | -0.083700 | 0.00077400  | -49.992 | 0.00023600 | -13.000 | 0.0021100   | -17.998 |
| 98.482 | -0.21758  | 0.0035300   | -0.22111  | 0.0011700   | -49.988 | 0.00026600 | -13.000 | 0.0020900   | -17.998 |
| 98.788 | -0.27647  | 0.0033100   | -0.27978  | 0.0013600   | -49.986 | 0.00028300 | -13.000 | 0.0016600   | -17.998 |
| 99.095 | -0.23616  | 0.0025500   | -0.23870  | 0.0012600   | -49.987 | 0.00029100 | -13.000 | 0.00099600  | -17.999 |
| 99.402 | -0.11306  | 0.0015000   | -0.11456  | 0.00090800  | -49.991 | 0.00029400 | -13.000 | 0.00030200  | -18.000 |
| 99.709 | 0.045700  | 0.00056100  | 0.045200  | 0.00049900  | -49.995 | 0.00029900 | -13.000 | -0.00023800 | -18.000 |
