# Supplementary material
Source: PubMed Central journal article supplement (PMC8325642)
Supplement: NIHMS1698257-supplement-Figure_4B_Area_vs__Oxo.pdf [file NIHMS1698257-supplement-Figure_4B_Area_vs__Oxo.pdf]

| # of Oxo ligand | Area of pre-edge peak | Insertase pH8 pre-edge area | Insertase pH6 | Dioxo-OSiPh3 |
|-----------------|-----------------------|-----------------------------|---------------|--------------|
| 4.0000          | 6.8000                |                             |               |              |
| 3.0000          | 6.3000                |                             |               |              |
| 2.0000          | 5.6500                | 5.4000                      | 5.2000        | 5.7000       |
| 2.0000          | 5.3000                |                             |               |              |
| 2.0000          | 5.7000                |                             |               |              |
| 2.0000          | 5.4000                |                             |               |              |
| 2.0000          | 5.2000                |                             |               |              |
