# Supplementary material
Source: PubMed Central journal article supplement (PMC8325642)
Supplement: NIHMS1698257-supplement-Supplementary_Fig1_A_HPLC_Replicate_1_pdf.pdf [file NIHMS1698257-supplement-Supplementary_Fig1_A_HPLC_Replicate_1_pdf.pdf]

| Var.              | M[g/mol] | Labeled |
|-------------------|----------|---------|
| CNXIE wt          | 48985,5  | 45      |
| CNXIE S269D D274S | 48886,36 | 46      |

| Sample Name | Conc in g/L | $\mu$ L protein oxidized | $\mu$ L injected | AUS       | pmol FormA  | $\mu$ g CNXIE var. Pro Vial | pmol CNXIE pro vial | $\mu$ L pro Vial | CNXIE var. Pmol/ $\mu$ L pro Vial | pmol CNXIE var. Inj. | Saturation  | Saturation % | Moco/MPT-AMP |
|-------------|-------------|--------------------------|------------------|-----------|-------------|-----------------------------|---------------------|------------------|-----------------------------------|----------------------|-------------|--------------|--------------|
| 45A 10 AP   | 0,5         | 10                       | 60               | 1986,698  | 0,442950139 | 2,5                         | 51,03551051         | 714              | 0,071478306                       | 4,288698362          | 0,103283118 | 10,32831179  | 8,910315929  |
| 45A 10 PDEI | 0,5         | 10                       | 80               | 4211,511  | 1,084920649 | 2,5                         | 51,03551051         | 724              | 0,070491037                       | 5,639282929          | 0,192386277 | 19,23862772  |              |
| 45A 15 AP   | 0,5         | 15                       | 60               | 3153,109  | 0,77951841  | 3,75                        | 76,55326576         | 714              | 0,107217459                       | 6,433047543          | 0,121174048 | 12,11740476  | 7,962087396  |
| 45A 15 PDEI | 0,5         | 15                       | 80               | 6337,963  | 1,69850906  | 3,75                        | 76,55326576         | 724              | 0,105736555                       | 8,458924394          | 0,200794922 | 20,07949216  |              |
| 45A 20 AP   | 0,5         | 20                       | 60               | 4270,054  | 1,10181325  | 5                           | 102,2780178         | 714              | 0,143246524                       | 8,594791415          | 0,128195461 | 12,81954613  | 5,116580771  |
| 45A 20 PDEI | 0,5         | 20                       | 80               | 7476,521  | 2,027040339 | 5                           | 102,2780178         | 724              | 0,14126798                        | 11,30143843          | 0,179361269 | 17,9361269   |              |
| 45A 30 AP   | 0,5         | 30                       | 60               | 6226,136  | 1,666241343 | 7,5                         | 153,1065315         | 714              | 0,214434918                       | 12,86609509          | 0,129506376 | 12,95063757  | 6,585103445  |
| 45A 30 PDEI | 0,5         | 30                       | 80               | 11905,512 | 3,305027124 | 7,5                         | 153,1065315         | 724              | 0,21147311                        | 16,91784879          | 0,19535741  | 19,53574101  |              |
| 46A 10 AP   | 0,5         | 10                       | 60               | 2320,795  | 0,539353936 | 2,5                         | 51,03551051         | 714              | 0,071478306                       | 4,288698362          | 0,125761686 | 12,57616858  | 34,35076625  |
| 46A 10 PDEI | 0,5         | 10                       | 80               | 9622,775  | 2,646342625 | 2,5                         | 51,03551051         | 724              | 0,070491037                       | 5,639282929          | 0,469269348 | 46,92693482  |              |
| 46A 15 AP   | 0,5         | 15                       | 60               | 3528,021  | 0,887699388 | 3,75                        | 76,70851338         | 714              | 0,107434893                       | 6,446093561          | 0,137711217 | 13,77112169  | 33,48927443  |
| 46A 15 PDEI | 0,5         | 15                       | 80               | 14334,209 | 4,005828428 | 3,75                        | 76,70851338         | 724              | 0,105950985                       | 8,476078826          | 0,472603961 | 47,26039611  |              |
| 46A 20 AP   | 0,5         | 20                       | 60               | 4365,828  | 1,129448869 | 5                           | 102,071021          | 714              | 0,142956612                       | 8,577396724          | 0,13167735  | 13,16773498  | 25,83118497  |
| 46A 20 PDEI | 0,5         | 20                       | 80               | 15695,117 | 4,398518871 | 5                           | 102,071021          | 724              | 0,140982073                       | 11,27856586          | 0,3899892   | 38,99891996  |              |
| 46A 30 AP   | 0,5         | 30                       | 30               | ND        | NA          | 7,5                         | 153,1065315         | 714              | 0,214434918                       | 6,433047543          | NA          | NA           | NA           |
| 46A 30 PDEI | 0,5         | 30                       | 80               | 24049,726 | 6,809243998 | 7,5                         | 153,1065315         | 724              | 0,21147311                        | 16,91784879          | 0,402488761 | 40,24887611  |              |
