# Supplementary material
Source: PubMed Central journal article supplement (PMC8325642)
Supplement: NIHMS1698257-supplement-Supplementary_Fig1_A_HPLC_Replicates_2_and_3_pdf.pdf [file NIHMS1698257-supplement-Supplementary_Fig1_A_HPLC_Replicates_2_and_3_pdf.pdf]

| Var.              | M(g/mol) | Labeled |
|-------------------|----------|---------|
| CNX1E wt          | 48985,5  | 45      |
| CNX1E S269D D274S | 48886,36 | 46      |

Replicates 2 and 3  
Replicates 2 and 3

| Sample Name  | Conc in g/L | $\mu$ L protein oxidized | $\mu$ L injected | AUS       | pmol FormA  | $\mu$ g CNX1E var. Pro Vial | pmol CNX1E pro vial | $\mu$ L pro Vial | CNX1E var. pmol/ $\mu$ L pro Vial | pmol CNX1E var. Inj. | Saturation  | Saturation % | Moco/MPT-AMP |
|--------------|-------------|--------------------------|------------------|-----------|-------------|-----------------------------|---------------------|------------------|-----------------------------------|----------------------|-------------|--------------|--------------|
| 45.2 10 AP   | 0,74        | 10                       | 30               | 1075,575  | 0,216917655 | 3,7                         | 75,53255555         | 714              | 0,105787893                       | 3,173636788          | 0,068348012 | 6,834801182  | 7,177319958  |
| 45.2 10 PDEI | 0,74        | 10                       | 30               | 1872,858  | 0,438551651 | 3,7                         | 75,53255555         | 724              | 0,104326734                       | 3,129802026          | 0,140121211 | 14,01212114  |              |
| 45.2 15 AP   | 0,74        | 15                       | 30               | 1816,521  | 0,422890304 | 5,55                        | 113,2988333         | 714              | 0,158681839                       | 4,760455182          | 0,088834006 | 8,883400587  | 5,964206045  |
| 45.2 15 PDEI | 0,74        | 15                       | 30               | 2802,732  | 0,69705104  | 5,55                        | 113,2988333         | 724              | 0,156490101                       | 4,694703038          | 0,148476066 | 14,84760663  |              |
| 45.2 20 AP   | 0,74        | 20                       | 30               | 2243,924  | 0,541705771 | 7,4                         | 151,3714664         | 714              | 0,212004855                       | 6,360145647          | 0,085171913 | 8,517191291  | 7,076776619  |
| 45.2 20 PDEI | 0,74        | 20                       | 30               | 3813,722  | 0,978100189 | 7,4                         | 151,3714664         | 724              | 0,209076611                       | 6,272298331          | 0,155939679 | 15,59396791  |              |
| 45.2 30 AP   | 0,74        | 30                       | 30               | 2908,41   | 0,726428889 | 11,1                        | 226,5976667         | 714              | 0,317363679                       | 9,520910364          | 0,076298259 | 7,629825945  | 8,916677179  |
| 45.2 30 PDEI | 0,74        | 30                       | 30               | 5883,976  | 1,55361837  | 11,1                        | 226,5976667         | 724              | 0,312980203                       | 9,389406077          | 0,165465031 | 16,54650312  |              |
| 46.2 10 AP   | 0,86        | 10                       | 30               | 1329,188  | 0,287414656 | 4,3                         | 87,78107807         | 714              | 0,122942686                       | 3,688280591          | 0,077926462 | 7,792646159  | 57,7141718   |
| 46.2 10 PDEI | 0,86        | 10                       | 30               | 8866,363  | 2,382704048 | 4,3                         | 87,78107807         | 724              | 0,121244583                       | 3,637337489          | 0,65506818  | 65,50681796  |              |
| 46.2 15 AP   | 0,86        | 15                       | 30               | 1990,297  | 0,471198988 | 6,45                        | 131,938643          | 714              | 0,184788015                       | 5,543640463          | 0,084998115 | 8,499811474  | 48,61438006  |
| 46.2 15 PDEI | 0,86        | 15                       | 30               | 11527,461 | 3,122473313 | 6,45                        | 131,938643          | 724              | 0,182235695                       | 5,467070843          | 0,571141915 | 57,11419154  |              |
| 46.2 20 AP   | 0,86        | 20                       | 30               | 2075,724  | 0,494947181 | 8,6                         | 175,5621561         | 714              | 0,245885373                       | 7,376561183          | 0,067097279 | 6,709727865  | 50,92726155  |
| 46.2 20 PDEI | 0,86        | 20                       | 30               | 15378,013 | 4,192903647 | 8,6                         | 175,5621561         | 724              | 0,242489166                       | 7,274674979          | 0,576369894 | 57,63698941  |              |
| 46.2 30 AP   | 0,86        | 30                       | 30               | 3310,344  | 0,838164128 | 12,9                        | 263,3432342         | 714              | 0,368828059                       | 11,06484177          | 0,075750214 | 7,575021358  | 44,64534455  |
| 46.2 30 PDEI | 0,86        | 30                       | 30               | 20793,199 | 5,698292839 | 12,9                        | 263,3432342         | 724              | 0,363733749                       | 10,91201247          | 0,522203659 | 52,22036591  |              |
| 45.3 10 AP   | 0,73        | 10                       | 30               | 1058,627  | 0,212200322 | 3,65                        | 74,51184534         | 714              | 0,104358327                       | 3,130749804          | 0,067779393 | 6,777939335  | 7,123518863  |
| 45.3 10 PDEI | 0,73        | 10                       | 30               | 1839,249  | 0,429208551 | 3,65                        | 74,51184534         | 724              | 0,102916913                       | 3,087507404          | 0,139014582 | 13,9014582   |              |
| 45.3 15 AP   | 0,73        | 15                       | 30               | 1575,165  | 0,355794785 | 5,475                       | 111,767768          | 714              | 0,15653749                        | 4,696124706          | 0,075763487 | 7,576348736  | 4,753607548  |
| 45.3 15 PDEI | 0,73        | 15                       | 30               | 2349,418  | 0,57103247  | 5,475                       | 111,767768          | 724              | 0,15437537                        | 4,631261106          | 0,123299563 | 12,32995628  |              |
| 45.3 20 AP   | 0,73        | 20                       | 30               | 1855,306  | 0,433672301 | 7,3                         | 149,325906          | 714              | 0,209139324                       | 6,274197733          | 0,069119961 | 6,911996069  | 5,510241311  |
| 45.3 20 PDEI | 0,73        | 20                       | 30               | 3060,218  | 0,768630602 | 7,3                         | 149,325906          | 724              | 0,206251251                       | 6,187537543          | 0,124222374 | 12,42223738  |              |
| 45.3 30 AP   | 0,73        | 30                       | 30               | 3460,801  | 0,87999027  | 10,95                       | 223,535536          | 714              | 0,31307498                        | 9,392249413          | 0,093693239 | 9,369323913  | 6,384714842  |
| 45.3 30 PDEI | 0,73        | 30                       | 30               | 5544,411  | 1,459221339 | 10,95                       | 223,535536          | 724              | 0,30875074                        | 9,262522211          | 0,157540388 | 15,75403876  |              |
| 46.3 10 AP   | 0,72        | 10                       | 30               | 1327,31   | 0,286892583 | 3,6                         | 73,49113513         | 714              | 0,102928761                       | 3,087862821          | 0,092909757 | 9,290975661  | 52,29324523  |
| 46.3 10 PDEI | 0,72        | 10                       | 30               | 7041,383  | 1,875370566 | 3,6                         | 73,49113513         | 724              | 0,101507093                       | 3,045212782          | 0,615842209 | 61,58422089  |              |
| 46.3 15 AP   | 0,72        | 15                       | 30               | 1989,859  | 0,471077227 | 5,4                         | 110,4602593         | 714              | 0,154706245                       | 4,641187364          | 0,101499291 | 10,1499291   | 55,50511598  |
| 46.3 15 PDEI | 0,72        | 15                       | 30               | 11105,194 | 3,005085622 | 5,4                         | 110,4602593         | 724              | 0,152569419                       | 4,577082566          | 0,656550451 | 65,65504508  |              |
| 46.3 20 AP   | 0,72        | 20                       | 30               | 2412,461  | 0,588558045 | 7,2                         | 146,9822703         | 714              | 0,205857521                       | 6,175725641          | 0,095301845 | 9,530184457  | 44,58868928  |
| 46.3 20 PDEI | 0,72        | 20                       | 30               | 12151,922 | 3,296069721 | 7,2                         | 146,9822703         | 724              | 0,203014185                       | 6,090425563          | 0,541188737 | 54,11887374  |              |
| 46.3 30 AP   | 0,72        | 30                       | 30               | 3660,809  | 0,935591293 | 10,8                        | 220,4734054         | 714              | 0,308786282                       | 9,263588462          | 0,100996638 | 10,09966383  | 49,44142114  |
| 46.3 30 PDEI | 0,72        | 30                       | 30               | 19862,119 | 5,43945819  | 10,8                        | 220,4734054         | 724              | 0,304521278                       | 9,135638345          | 0,59541085  | 59,54108497  |              |
