# Supplementary material
Source: PubMed Central journal article supplement (PMC8325642)
Supplement: NIHMS1698257-supplement-Supplementary_Fig1_A_ICP-MS_Replicates_1-3_pdf.pdf [file NIHMS1698257-supplement-Supplementary_Fig1_A_ICP-MS_Replicates_1-3_pdf.pdf]

Var. CNXIE wt CNXIE S269D D274S

M[g/mol] 48985,5 48886,36

Labeled 45 46

| Sample | Real [Mo] in µg/L in undiluted s [Mo] g/l | [Mo] mol/L  | CNXIE mol/L | Saturation Mo          |
|--------|-------------------------------------------|-------------|-------------|------------------------|
| 45.1   | 3324,065892                               | 0,003324066 | 3,3919E-05  | 0,00022476 0,150912    |
|        | 3353,669532                               | 0,00335367  | 3,42211E-05 | 0,00022476 0,152256    |
|        | 3126,70829                                | 0,003126708 | 3,19052E-05 | 0,00022476 0,141952    |
| 46.1   | 7516,018368                               | 0,007516018 | 7,66941E-05 | 0,000217003 0,353424   |
|        | 8686,8554                                 | 0,008686855 | 8,86414E-05 | 0,000217003 0,40848    |
|        | 7377,532267                               | 0,007377532 | 7,52809E-05 | 0,000217003 0,346912   |
| 45.2   | 6267,603899                               | 0,006267604 | 6,39551E-05 | 0,000400935 0,159515   |
|        | 3966,686215                               | 0,003966686 | 4,04764E-05 | 0,000400935 0,100955   |
|        | 3699,044749                               | 0,003699045 | 3,77454E-05 | 0,000400935 0,09414333 |
| 46.2   | 17777,98486                               | 0,017777985 | 0,000181408 | 0,000391136 0,4637976  |
|        | 17755,70669                               | 0,017755707 | 0,000181181 | 0,000391136 0,4632164  |
|        | 16768,04086                               | 0,016768041 | 0,000171102 | 0,000391136 0,43744987 |
| 45.3   | 3429,193961                               | 0,003429194 | 3,49918E-05 | 0,00033071 0,105808    |
|        | 2904,677147                               | 0,002904677 | 2,96396E-05 | 0,00033071 0,089624    |
|        | 3026,623634                               | 0,003026624 | 3,08839E-05 | 0,00033071 0,09338667  |
| 46.3   | 13349,3045                                | 0,013349305 | 0,000136217 | 0,00027253 0,499826    |
|        | 11708,78757                               | 0,011708788 | 0,000119477 | 0,00027253 0,4384016   |
|        | 15472,32643                               | 0,015472326 | 0,000157881 | 0,00027253 0,5793164   |

c
