# Supplementary material
Source: PubMed Central journal article supplement (PMC8325642)
Supplement: NIHMS1698257-supplement-Supplementary_Fig5_A_Insertase_pH6_EXAFS_pdf.pdf [file NIHMS1698257-supplement-Supplementary_Fig5_A_Insertase_pH6_EXAFS_pdf.pdf]

| k             | Insertase-pH6   | Fit              | residue         | Mo-Oxo           | Mo-Oxo+8      | Mo-O             | Mo-O+18       | Mo-S            | Mo-S+15       |
|---------------|-----------------|------------------|-----------------|------------------|---------------|------------------|---------------|-----------------|---------------|
| 0.000000000   | 0.000000000     | 0.000000000      | 0.000000000     | 0.000000000      | 8.000.000.000 | 0.000000000      | 1.800.000.000 | 0.000000000     | 1.500.000.000 |
| 0.05000000075 | 6,49E+04        | -1,16E+04        | 7,65E+04        | -1,63E+04        | 7,999.983.788 | 3,67E+03         | 1.800.000.381 | 1,01E+03        | 1.500.000.095 |
| 0.1000000015  | 0.0005970000036 | -9,23E+04        | 0.0005970000036 | -0.0001300000004 | 7.999.869.823 | 2,95E+04         | 1.800.002.861 | 8,12E+03        | 1.500.000.858 |
| 0.1500000060  | 0.0016599999951 | -0.0003100000031 | 0.0016600000023 | -0.0004370000097 | 7.999.563.217 | 1,00E+05         | 1.800.009.918 | 2,75E+04        | 1.500.002.766 |
| 0.2000000030  | 0.0038099999907 | -0.0007280000136 | 0.0045300000035 | -0.0010300000043 | 7.998.970.032 | 0.0002390000009  | 1.800.023.842 | 6,53E+04        | 1.500.006.485 |
| 0.2500000000  | 0.0072099999952 | -0.0014100000026 | 0.0086200000444 | -0.0020099999938 | 7.997.990.131 | 0.0004699999990  | 1.800.046.921 | 0.0001279999997 | 1.500.012.779 |
| 0.30000000119 | 0.012099999993  | -0.0024000000114 | 0.014499999958  | -0.003439999884  | 7.996.560.097 | 0.00082000000157 | 1.800.082.016 | 0.0002220000024 | 1.500.022.221 |
| 0.3499999940  | 0.01850000024   | -0.003749999916  | 0.022299999937  | -0.005429999903  | 7.994.569.778 | 0.0013200000039  | 1.800.131.989 | 0.0003539999889 | 1.500.035.381 |
| 0.4000000060  | 0.02669999935   | -0.005510000046  | 0.03220000118   | -0.008030000143  | 7.991.970.062 | 0.0019900000019  | 1.800.198.936 | 0.0005319999764 | 1.500.053.215 |
| 0.4499999881  | 0.03660000116   | -0.007679999806  | 0.04430000111   | -0.01130000036   | 7.988.699.913 | 0.002869999968   | 1.800.287.056 | 0.0007619999815 | 1.500.076.199 |
| 0.5000000000  | 0.04820000008   | -0.01030000020   | 0.058499999934  | -0.01530000009   | 7.984.700.203 | 0.003990000114   | 1.800.399.017 | 0.001049999963  | 1.500.105.000 |
| 0.5500000119  | 0.06080000103   | -0.01339999959   | 0.07419999689   | -0.02019999921   | 7.979.800.224 | 0.005390000064   | 1.800.539.017 | 0.001410000026  | 1.500.140.953 |
| 0.6000000238  | 0.07450000197   | -0.01679999940   | 0.09139999747   | -0.02580000088   | 7.974.199.772 | 0.007100000046   | 1.800.709.915 | 0.001850000001  | 1.500.185.013 |
| 0.6499999762  | 0.08839999884   | -0.02080000006   | 0.1091916934    | -0.03229999915   | 7.967.700.005 | 0.009150000289   | 1.800.914.955 | 0.002369999886  | 1.500.236.988 |
| 0.6999999881  | 0.1020521894    | -0.02500000037   | 0.1270121187    | -0.03959999979   | 7.960.400.105 | 0.01159999985    | 1.801.160.049 | 0.003010000102  | 1.500.300.980 |
| 0.7500000000  | 0.1158319637    | -0.02930000052   | 0.1451313943    | -0.04749999940   | 7.952.499.866 | 0.01439999975    | 1.801.440.048 | 0.003800000064  | 1.500.380.039 |
| 0.8000000119  | 0.1286485344    | -0.03379999846   | 0.1624228656    | -0.05629999936   | 7.943.699.837 | 0.01769999973    | 1.801.770.020 | 0.004749999847  | 1.500.475.025 |
| 0.8500000238  | 0.1391974539    | -0.03830000013   | 0.1774732172    | -0.06560000032   | 7.934.400.082 | 0.02150000073    | 1.802.149.963 | 0.005859999917  | 1.500.586.033 |
| 0.8999999762  | 0.1476995945    | -0.04270000011   | 0.1903772354    | -0.07559999824   | 7.924.399.853 | 0.02569999918    | 1.802.569.962 | 0.007160000037  | 1.500.716.019 |
| 0.9499999881  | 0.1504105031    | -0.04679999873   | 0.1972476542    | -0.08600000292   | 7.914.000.034 | 0.03050000034    | 1.803.050.041 | 0.008670000359  | 1.500.866.985 |
| 1.000.000.000 | 0.1492498815    | -0.05059999973   | 0.1998452842    | -0.09669999778   | 7.903.299.809 | 0.03570000082    | 1.803.569.984 | 0.01040000003   | 1.501.039.982 |
| 1.049.999.952 | 0.1455788463    | -0.05380000174   | 0.1993572265    | -0.1076681390    | 7.892.332.077 | 0.04149999842    | 1.804.150.009 | 0.01240000036   | 1.501.239.967 |
| 1.100.000.024 | 0.1283319145    | -0.05539999902   | 0.1837693155    | -0.1181743667    | 7.881.825.447 | 0.04769999906    | 1.804.770.088 | 0.01510000043   | 1.501.509.953 |
| 1.149.999.976 | 0.1180664971    | -0.05530000106   | 0.1733786613    | -0.1280124635    | 7.871.987.343 | 0.05420000106    | 1.805.419.922 | 0.01850000024   | 1.501.850.033 |
| 1.200.000.048 | 0.08569999784   | -0.05359999835   | 0.1392479837    | -0.1371705234    | 7.862.829.685 | 0.06109999865    | 1.806.110.001 | 0.02239999920   | 1.502.239.990 |
| 1.250.000.000 | 0.05920000002   | -0.05000000075   | 0.1091855690    | -0.1453685462    | 7.854.631.424 | 0.06830000132    | 1.806.830.025 | 0.02700000070   | 1.502.700.043 |
| 1.299.999.952 | 0.01600000076   | -0.04430000111   | 0.06030000001   | -0.1523052007    | 7.847.694.874 | 0.07569999993    | 1.807.570.076 | 0.03229999915   | 1.503.230.000 |
| 1.350.000.024 | -0.03159999847  | -0.03620000184   | 0.004590000026  | -0.1576598138    | 7.842.339.993 | 0.08309999853    | 1.808.309.937 | 0.03840000182   | 1.503.839.970 |
| 1.399.999.976 | -0.08529999852  | -0.02429999970   | -0.06100000069  | -0.1604699641    | 7.839.529.991 | 0.09040000290    | 1.809.040.070 | 0.04580000043   | 1.504.580.021 |
| 1.450.000.048 | -0.1498350948   | -0.007400000002  | -0.1424368918   | -0.1598047763    | 7.840.195.179 | 0.09719999880    | 1.809.720.039 | 0.05519999936   | 1.505.519.962 |
| 1.500.000.000 | -0.2207143754   | 0.01319999993    | -0.2388659018   | -0.1561445445    | 7.843.855.381 | 0.1034616828     | 1.810.346.222 | 0.06580000371   | 1.506.579.971 |
| 1.549.999.952 | -0.3007620275   | 0.03759999946    | -0.3383505940   | -0.1491042972    | 7.850.895.882 | 0.1090337411     | 1.810.903.358 | 0.077699999653  | 1.507.769.966 |
| 1.600.000.024 | -0.3548170328   | 0.06610000134    | -0.4208867252   | -0.1383016706    | 7.861.698.151 | 0.1136979982     | 1.811.369.705 | 0.09070000052   | 1.509.070.015 |
| 1.649.999.976 | -0.4190180898   | 0.09870000184    | -0.5177194476   | -0.1233623028    | 7.876.637.459 | 0.1172360703     | 1.811.723.518 | 0.1048275977    | 1.510.482.788 |

|               |                |              |                |                |               |                |               |                |               |
|---------------|----------------|--------------|----------------|----------------|---------------|----------------|---------------|----------------|---------------|
| 1.700.000.048 | -0.4813217521  | 0.1381665468 | -0.6194882989  | -0.1015616208  | 7.898.438.454 | 0.1186420619   | 1.811.864.281 | 0.1210860983   | 1.512.108.612 |
| 1.750.000.000 | -0.5157604814  | 0.1821265519 | -0.6978870630  | -0.07419999689 | 7.925.799.847 | 0.1181277931   | 1.811.812.782 | 0.1382223368   | 1.513.822.269 |
| 1.799.999.952 | -0.5726916790  | 0.2298486084 | -0.8025402427  | -0.0414000045  | 7.958.600.044 | 0.1155649275   | 1.811.556.435 | 0.1557001024   | 1.515.569.973 |
| 1.850.000.024 | -0.5844030380  | 0.2809078991 | -0.8653109074  | -0.00289999963 | 7.997.099.876 | 0.1107267216   | 1.811.072.731 | 0.1730803847   | 1.517.308.044 |
| 1.899.999.976 | -0.6230815053  | 0.3347662389 | -0.9578477740  | 0.04149999842  | 8.041.500.092 | 0.1034033224   | 1.810.340.309 | 0.1898452789   | 1.518.984.509 |
| 1.950.000.048 | -0.6047077775  | 0.3913190663 | -0.9960268140  | 0.09440000355  | 8.094.400.406 | 0.09239999950  | 1.809.239.960 | 0.2045648396   | 1.520.456.505 |
| 2.000.000.000 | -0.5849157572  | 0.4485373795 | -1.033.453.107 | 0.1544800252   | 8.154.479.980 | 0.07789999992  | 1.807.789.993 | 0.2161915153   | 1.521.619.129 |
| 2.049.999.952 | -0.5360214710  | 0.5049239397 | -1.040.945.411 | 0.2207021564   | 8.220.702.171 | 0.06019999832  | 1.806.019.974 | 0.2239940614   | 1.522.399.426 |
| 2.099.999.905 | -0.4773377180  | 0.5592582226 | -1.036.595.941 | 0.2928702831   | 8.292.870.522 | 0.03940000013  | 1.803.940.010 | 0.2269875258   | 1.522.698.784 |
| 2.150.000.095 | -0.4063819349  | 0.6102690101 | -1.016.650.915 | 0.3706955314   | 8.370.695.114 | 0.01539999992  | 1.801.539.993 | 0.2241748273   | 1.522.417.450 |
| 2.200.000.048 | -0.3110636175  | 0.6537072062 | -0.9647708535  | 0.4564608335   | 8.456.460.953 | -0.01319999993 | 1.798.679.924 | 0.2104430199   | 1.521.044.350 |
| 2.250.000.000 | -0.2302453071  | 0.6891235113 | -0.9193688035  | 0.5473618507   | 8.547.361.374 | -0.04509999976 | 1.795.490.074 | 0.1869081706   | 1.518.690.777 |
| 2.299.999.952 | -0.1389655769  | 0.7159045339 | -0.8548700809  | 0.6419521570   | 8.641.952.515 | -0.07980000228 | 1.792.020.035 | 0.1537410021   | 1.515.374.088 |
| 2.349.999.905 | -0.05799999833 | 0.7330477238 | -0.7910216451  | 0.7393578291   | 8.739.357.948 | -0.1167396605  | 1.788.326.073 | 0.1104295328   | 1.511.042.976 |
| 2.400.000.095 | 0.02610000037  | 0.7392072678 | -0.7131546736  | 0.8386457562   | 8.838.645.935 | -0.1557288468  | 1.784.427.071 | 0.05629999936  | 1.505.630.016 |
| 2.450.000.048 | 0.1402730644   | 0.7252821922 | -0.5850090981  | 0.9382677078   | 8.938.267.708 | -0.1984293014  | 1.780.157.089 | -0.01460000034 | 1.498.540.020 |
| 2.500.000.000 | 0.2330069840   | 0.7006739974 | -0.4676670134  | 1.034.974.098  | 9.034.974.098 | -0.2404962927  | 1.775.950.432 | -0.09380000085 | 1.490.620.041 |
| 2.549.999.952 | 0.2504787743   | 0.6666797996 | -0.4162010252  | 1.127.075.911  | 9.127.076.149 | -0.2808876634  | 1.771.911.240 | -0.1795084774  | 1.482.049.179 |
| 2.599.999.905 | 0.3794330955   | 0.6250782609 | -0.2456451505  | 1.212.839.842  | 9.212.840.080 | -0.3185277283  | 1.768.147.278 | -0.2692339122  | 1.473.076.630 |
| 2.650.000.095 | 0.4448287189   | 0.5858786106 | -0.1410499066  | 1.297.904.730  | 9.297.904.968 | -0.3531140089  | 1.764.688.683 | -0.3589120209  | 1.464.108.753 |
| 2.700.000.048 | 0.5375835896   | 0.5509213805 | -0.01329999976 | 1.381.790.638  | 9.381.790.161 | -0.3844420910  | 1.761.555.862 | -0.4464271069  | 1.455.357.265 |
| 2.750.000.000 | 0.6157332659   | 0.5117147565 | 0.1040185094   | 1.452.358.246  | 9.452.358.246 | -0.4105894268  | 1.758.941.078 | -0.5300540924  | 1.446.994.591 |
| 2.799.999.952 | 0.7316606641   | 0.4706860781 | 0.2609745562   | 1.506.750.226  | 9.506.750.107 | -0.4303542972  | 1.756.964.493 | -0.6057098508  | 1.439.428.997 |
| 2.849.999.905 | 0.8224359155   | 0.4303468168 | 0.3920890987   | 1.542.206.645  | 9.542.206.764 | -0.4426268041  | 1.755.737.305 | -0.6692329645  | 1.433.076.668 |
| 2.900.000.095 | 0.8803470135   | 0.3883676827 | 0.4919793308   | 1.569.232.702  | 9.569.232.941 | -0.4522960484  | 1.754.770.470 | -0.7285689912  | 1.427.143.097 |
| 2.950.000.048 | 0.9669746757   | 0.3497771621 | 0.6171975136   | 1.579.773.664  | 9.579.773.903 | -0.4552217424  | 1.754.477.882 | -0.7747747898  | 1.422.522.545 |
| 3.000.000.000 | 0.9929000735   | 0.3167748749 | 0.6761252284   | 1.571.645.737  | 9.571.645.737 | -0.4504802227  | 1.754.952.049 | -0.8043906093  | 1.419.560.909 |
| 3.049.999.952 | 0.9955290556   | 0.2909259200 | 0.7046030760   | 1.543.823.481  | 9.543.823.242 | -0.4377348125  | 1.756.226.540 | -0.8151627779  | 1.418.483.734 |
| 3.099.999.905 | 0.9631148577   | 0.2726941407 | 0.6904207468   | 1.494.231.939  | 9.494.232.178 | -0.4166790247  | 1.758.332.062 | -0.8048588037  | 1.419.514.084 |
| 3.150.000.095 | 0.8567708135   | 0.2629273236 | 0.5938435197   | 1.421.996.951  | 9.421.997.070 | -0.3870508373  | 1.761.294.937 | -0.7720187902  | 1.422.798.157 |
| 3.200.000.048 | 0.8048393130   | 0.2628256083 | 0.5420137048   | 1.328.427.911  | 9.328.428.268 | -0.3490824699  | 1.765.091.705 | -0.7165198326  | 1.428.347.969 |
| 3.250.000.000 | 0.7437756062   | 0.2721801102 | 0.4715954959   | 1.213.730.693  | 9.213.730.812 | -0.3031150997  | 1.769.688.416 | -0.6384354830  | 1.436.156.464 |
| 3.299.999.952 | 0.5625823140   | 0.2900232673 | 0.2725590169   | 1.077.957.034  | 9.077.957.153 | -0.2495268285  | 1.775.047.302 | -0.5384069085  | 1.446.159.267 |
| 3.349.999.905 | 0.3213037252   | 0.3125360012 | 0.00877000190  | 0.9163652658   | 8.916.365.623 | -0.1872088462  | 1.781.279.182 | -0.4166204035  | 1.458.337.975 |
| 3.400.000.095 | 0.3079065382   | 0.3400709629 | -0.03220000118 | 0.7364635468   | 8.736.463.547 | -0.1189566702  | 1.788.104.248 | -0.2774359584  | 1.472.256.374 |

|               |                |                |                 |                |               |                |               |                |               |
|---------------|----------------|----------------|-----------------|----------------|---------------|----------------|---------------|----------------|---------------|
| 3.450.000.048 | 0.2275533974   | 0.3703365922   | -0.1427831948   | 0.5400093794   | 8.540.009.499 | -0.04589999840 | 1.795.409.966 | -0.1237657294  | 1.487.623.405 |
| 3.500.000.000 | 0.01700000092  | 0.4006300867   | -0.3836126924   | 0.3290820122   | 8.329.082.489 | 0.03070000000  | 1.803.070.068 | 0.04089999944  | 1.504.090.023 |
| 3.549.999.952 | -0.1287629753  | 0.4249224067   | -0.5536854267   | 0.1015367880   | 8.101.536.751 | 0.1110313386   | 1.811.103.058 | 0.2123542875   | 1.521.235.466 |
| 3.599.999.905 | -0.2153840065  | 0.4409534335   | -0.6563744400   | -0.1375252455  | 7.862.474.918 | 0.1927050352   | 1.819.270.515 | 0.3857736290   | 1.538.577.366 |
| 3.650.000.095 | -0.2604414523  | 0.4464167953   | -0.7068582773   | -0.3833912015  | 7.616.608.620 | 0.2733531892   | 1.827.335.358 | 0.5564548373   | 1.555.645.466 |
| 3.700.000.048 | -0.2436882854  | 0.4380770624   | -0.6817653179   | -0.6327399611  | 7.367.259.979 | 0.3512335718   | 1.835.123.444 | 0.7195834517   | 1.571.958.351 |
| 3.750.000.000 | -0.3072656095  | 0.4134617746   | -0.7207273841   | -0.8821018338  | 7.117.897.987 | 0.4246664643   | 1.842.466.736 | 0.8708971739   | 1.587.089.729 |
| 3.799.999.952 | -0.1134840772  | 0.3699053526   | -0.4833894372   | -1.127.106.428 | 6.872.893.333 | 0.4916823506   | 1.849.168.205 | 1.005.329.490  | 1.600.532.913 |
| 3.849.999.905 | -0.2910211086  | 0.3041662276   | -0.5951873064   | -1.363.665.819 | 6.636.334.419 | 0.5504363775   | 1.855.043.602 | 1.117.395.759  | 1.611.739.540 |
| 3.900.000.095 | -0.1765946597  | 0.2144486308   | -0.3910432756   | -1.588.041.663 | 6.411.958.218 | 0.5994235277   | 1.859.942.436 | 1.203.066.826  | 1.620.306.778 |
| 3.950.000.048 | -0.1793325692  | 0.09929999709  | -0.2786101997   | -1.797.276.974 | 6.202.723.026 | 0.6375387907   | 1.863.753.891 | 1.259.015.799  | 1.625.901.604 |
| 4.000.000.000 | -0.1694590449  | -0.04470000044 | -0.1247581691   | -1.991.470.933 | 6.008.529.186 | 0.6646461487   | 1.866.464.615 | 1.282.123.923  | 1.628.212.357 |
| 4.050.000.191 | -0.1780781597  | -0.2153859288  | 0.03730000183   | -2.163.337.231 | 5.836.662.769 | 0.6784957051   | 1.867.849.541 | 1.269.455.552  | 1.626.945.496 |
| 4.099.999.905 | -0.4500291049  | -0.4110916555  | -0.03889999911  | -2.309.705.496 | 5.690.294.266 | 0.6784385443   | 1.867.843.819 | 1.220.175.147  | 1.622.017.479 |
| 4.150.000.095 | -0.1676285267  | -0.6290534735  | 0.4614249468    | -2.427.738.667 | 5.572.261.333 | 0.6641381979   | 1.866.413.879 | 1.134.546.995  | 1.613.454.628 |
| 4.199.999.809 | -0.2991871834  | -0.8676683903  | 0.5684812665    | -2.514.487.028 | 5.485.512.733 | 0.6347093582   | 1.863.470.840 | 1.012.109.160  | 1.601.210.976 |
| 4.250.000.000 | -0.6469803452  | -1.120.241.642 | 0.4732613266    | -2.567.137.241 | 5.432.862.759 | 0.5908330679   | 1.859.083.366 | 0.8560625911   | 1.585.606.289 |
| 4.300.000.191 | -0.3167684376  | -1.380.485.535 | 1.063.717.127   | -2.584.170.580 | 5.415.829.659 | 0.5333279371   | 1.853.332.710 | 0.6703571677   | 1.567.035.675 |
| 4.349.999.905 | -0.6034745574  | -1.641.515.136 | 1.038.040.519   | -2.564.654.112 | 5.435.345.650 | 0.4632901847   | 1.846.328.926 | 0.4598488212   | 1.545.984.840 |
| 4.400.000.095 | -1.126.930.118 | -1.900.107.026 | 0.7731769085    | -2.510.954.142 | 5.489.046.097 | 0.3821907938   | 1.838.219.070 | 0.2286563218   | 1.522.865.677 |
| 4.449.999.809 | -1.303.595.901 | -2.146.371.841 | 0.8427758813    | -2.421.692.133 | 5.578.308.105 | 0.2914079130   | 1.829.140.854 | -0.01610000059 | 1.498.390.007 |
| 4.500.000.000 | -1.399.306.536 | -2.369.692.326 | 0.9703857899    | -2.296.276.808 | 5.703.722.954 | 0.1928467453   | 1.819.284.630 | -0.2662622631  | 1.473.373.795 |
| 4.550.000.191 | -1.526.647.329 | -2.561.480.045 | 1.034.832.716   | -2.136.103.868 | 5.863.896.370 | 0.08869999647  | 1.808.869.934 | -0.5141047835  | 1.448.589.516 |
| 4.599.999.905 | -1.760.176.063 | -2.717.233.896 | 0.9570577741    | -1.944.999.695 | 6.055.000.305 | -0.01869999990 | 1.798.130.035 | -0.7535229921  | 1.424.647.713 |
| 4.650.000.095 | -1.575.594.068 | -2.829.578.161 | 1.253.983.974   | -1.725.416.780 | 6.274.583.340 | -0.1272441596  | 1.787.275.505 | -0.9769171476  | 1.402.308.273 |
| 4.699.999.809 | -1.801.906.109 | -2.886.946.201 | 1.085.040.092   | -1.478.181.958 | 6.521.818.161 | -0.2341925353  | 1.776.580.811 | -1.174.571.753 | 1.382.542.801 |
| 4.750.000.000 | -2.177.004.099 | -2.883.247.375 | 0.7062430382    | -1.206.818.342 | 6.793.181.419 | -0.3369671106  | 1.766.303.253 | -1.339.461.803 | 1.366.053.772 |
| 4.800.000.191 | -2.403.904.200 | -2.815.070.152 | 0.4111658633    | -0.9158764482  | 7.084.123.611 | -0.4332803488  | 1.756.671.906 | -1.465.913.296 | 1.353.408.623 |
| 4.849.999.905 | -2.193.769.932 | -2.681.007.147 | 0.4872371852    | -0.6098618507  | 7.390.138.149 | -0.5213588476  | 1.747.864.151 | -1.549.786.448 | 1.345.021.343 |
| 4.900.000.095 | -1.917.942.286 | -2.476.535.082 | 0.5585927367    | -0.2915627956  | 7.708.436.966 | -0.5985279083  | 1.740.147.209 | -1.586.444.259 | 1.341.355.610 |
| 4.949.999.809 | -1.722.023.129 | -2.202.387.571 | 0.4803645015    | 0.03409999982  | 8.034.099.579 | -0.6628088355  | 1.733.719.063 | -1.573.714.614 | 1.342.628.574 |
| 5.000.000.000 | -1.870.965.958 | -1.861.834.049 | -0.009130000137 | 0.3622038066   | 8.362.203.598 | -0.7127266526  | 1.728.727.341 | -1.511.311.293 | 1.348.868.847 |
| 5.050.000.191 | -1.433.508.158 | -1.461.052.418 | 0.02749999985   | 0.6887037158   | 8.688.703.537 | -0.7484377027  | 1.725.156.212 | -1.401.318.431 | 1.359.868.145 |
| 5.099.999.905 | -0.8687862754  | -1.002.083.063 | 0.1332968473    | 1.008.748.055  | 9.008.748.055 | -0.7673517466  | 1.723.264.885 | -1.243.479.252 | 1.375.652.122 |
| 5.150.000.095 | -0.6000563502  | -0.4936938286  | -0.1063624993   | 1.317.216.158  | 9.317.215.919 | -0.7688429356  | 1.723.115.730 | -1.042.067.170 | 1.395.793.247 |

|               |                |                |                 |                |               |                |               |                |               |
|---------------|----------------|----------------|-----------------|----------------|---------------|----------------|---------------|----------------|---------------|
| 5.199.999.809 | 0.1009045988   | 0.0533999869   | 0.04749999940   | 1.609.117.508  | 9.609.117.508 | -0.7527257204  | 1.724.727.440 | -0.8029526472  | 1.419.704.723 |
| 5.250.000.000 | 0.3754931688   | 0.6278708577   | -0.2523776591   | 1.881.290.555  | 9.881.290.436 | -0.7204291821  | 1.727.957.153 | -0.5329905152  | 1.446.700.954 |
| 5.300.000.191 | 0.7868199348   | 1.216.927.767  | -0.4301078618   | 2.128.865.242  | 1.012.886.524 | -0.6714677215  | 1.732.853.317 | -0.2404698431  | 1.475.953.007 |
| 5.349.999.905 | 1.522.977.233  | 1.805.972.219  | -0.2829950154   | 2.347.678.423  | 1.034.767.818 | -0.6068440080  | 1.739.315.605 | 0.0650999931   | 1.506.509.972 |
| 5.400.000.095 | 2.163.919.926  | 2.379.754.782  | -0.2158347666   | 2.534.060.717  | 1.053.406.048 | -0.5280331969  | 1.747.196.770 | 0.3737272024   | 1.537.372.684 |
| 5.449.999.809 | 2.714.506.149  | 2.930.962.801  | -0.2164565176   | 2.689.770.460  | 1.068.977.070 | -0.4373847544  | 1.756.261.444 | 0.6785770655   | 1.567.857.742 |
| 5.500.000.000 | 3.580.955.267  | 3.439.714.193  | 0.1412410140    | 2.808.903.217  | 1.080.890.274 | -0.3362677991  | 1.766.373.253 | 0.9670788050   | 1.596.707.916 |
| 5.550.000.191 | 4.166.589.737  | 3.889.313.459  | 0.2772760093    | 2.888.137.341  | 1.088.813.782 | -0.2269264907  | 1.777.307.320 | 1.228.102.684  | 1.622.810.364 |
| 5.599.999.905 | 4.247.013.569  | 4.266.040.802  | -0.01899999939  | 2.925.935.268  | 1.092.593.575 | -0.1119992509  | 1.788.800.049 | 1.452.104.568  | 1.645.210.457 |
| 5.650.000.095 | 4.382.802.963  | 4.564.095.497  | -0.1812922955   | 2.925.032.854  | 1.092.503.262 | 0.005770000163 | 1.800.576.973 | 1.633.293.509  | 1.663.329.315 |
| 5.699.999.809 | 4.967.849.255  | 4.770.594.120  | 0.1972551346    | 2.883.647.919  | 1.088.364.792 | 0.1238432676   | 1.812.384.415 | 1.763.102.889  | 1.676.310.349 |
| 5.750.000.000 | 5.068.381.786  | 4.874.444.485  | 0.1939372867    | 2.800.420.046  | 1.080.041.981 | 0.2393745035   | 1.823.937.416 | 1.834.649.920  | 1.683.465.004 |
| 5.800.000.191 | 4.657.148.361  | 4.870.271.206  | -0.2131227851   | 2.676.405.191  | 1.067.640.495 | 0.3495156765   | 1.834.951.591 | 1.844.350.338  | 1.684.435.081 |
| 5.849.999.905 | 4.439.778.805  | 4.762.979.507  | -0.3232006729   | 2.519.340.515  | 1.051.934.052 | 0.4524449408   | 1.845.244.408 | 1.791.194.081  | 1.679.119.492 |
| 5.900.000.095 | 4.103.641.033  | 4.551.940.918  | -0.4482997656   | 2.329.977.512  | 1.032.997.704 | 0.5461935401   | 1.854.619.408 | 1.675.769.448  | 1.667.576.981 |
| 5.949.999.809 | 4.231.304.169  | 4.234.272.480  | -0.002970000030 | 2.105.686.188  | 1.010.568.619 | 0.6278693676   | 1.862.786.865 | 1.500.717.044  | 1.650.071.716 |
| 6.000.000.000 | 3.653.054.237  | 3.816.269.159  | -0.1632148325   | 1.849.592.090  | 9.849.592.209 | 0.6954057813   | 1.869.540.596 | 1.271.271.348  | 1.627.127.075 |
| 6.050.000.191 | 3.150.618.315  | 3.307.168.245  | -0.1565501243   | 1.565.371.633  | 9.565.371.513 | 0.7470796704   | 1.874.707.985 | 0.9947170019   | 1.599.471.664 |
| 6.099.999.905 | 2.757.459.641  | 2.718.907.595  | 0.03860000148   | 1.257.194.757  | 9.257.194.519 | 0.7815600634   | 1.878.156.090 | 0.6801528931   | 1.568.015.289 |
| 6.150.000.095 | 1.696.212.173  | 2.065.787.315  | -0.3695749938   | 0.9296584129   | 8.929.658.890 | 0.7979460955   | 1.879.794.693 | 0.3381826580   | 1.533.818.245 |
| 6.199.999.809 | 1.067.547.560  | 1.364.050.269  | -0.2965027392   | 0.5877108574   | 8.587.711.334 | 0.7957944274   | 1.879.579.353 | -0.01950000040 | 1.498.050.022 |
| 6.250.000.000 | 0.2764127553   | 0.6313988566   | -0.3549860716   | 0.2365695834   | 8.236.569.405 | 0.7751333117   | 1.877.513.313 | -0.3803040981  | 1.461.969.566 |
| 6.300.000.191 | -0.8807289600  | -0.1135454029  | -0.7671835423   | -0.1183669716  | 7.881.632.805 | 0.7364645600   | 1.873.646.545 | -0.7316430211  | 1.426.835.728 |
| 6.349.999.905 | -1.350.612.521 | -0.8548346162  | -0.4957779050   | -0.4736727178  | 7.526.327.133 | 0.6813493371   | 1.868.134.880 | -1.062.511.206 | 1.393.748.856 |
| 6.400.000.095 | -2.346.128.702 | -1.580.709.815 | -0.7654190063   | -0.8294463158  | 7.170.553.684 | 0.6115809679   | 1.861.158.180 | -1.362.844.348 | 1.363.715.553 |
| 6.449.999.809 | -3.019.106.388 | -2.265.187.263 | -0.7539191842   | -1.175.461.292 | 6.824.538.708 | 0.5267825723   | 1.852.678.299 | -1.616.508.365 | 1.338.349.152 |
| 6.500.000.000 | -3.839.302.301 | -2.891.029.835 | -0.9482722878   | -1.506.218.910 | 6.493.781.090 | 0.4289981127   | 1.842.899.895 | -1.813.809.156 | 1.318.619.061 |
| 6.550.000.191 | -4.455.030.918 | -3.442.900.896 | -1.012.129.903  | -1.816.428.542 | 6.183.571.339 | 0.3206202090   | 1.832.061.958 | -1.947.092.414 | 1.305.290.794 |
| 6.599.999.905 | -5.131.434.441 | -3.907.828.569 | -1.223.605.752  | -2.101.101.160 | 5.898.899.078 | 0.2043278813   | 1.820.432.854 | -2.011.055.231 | 1.298.894.501 |
| 6.650.000.095 | -5.544.783.115 | -4.275.588.512 | -1.269.194.961  | -2.355.638.504 | 5.644.361.496 | 0.08299999684  | 1.808.300.018 | -2.002.965.689 | 1.299.703.407 |
| 6.699.999.809 | -5.539.757.252 | -4.538.983.345 | -1.000.773.787  | -2.575.916.767 | 5.424.083.233 | -0.04030000046 | 1.795.969.963 | -1.922.785.997 | 1.307.721.424 |
| 6.750.000.000 | -5.869.079.113 | -4.694.018.841 | -1.175.059.915  | -2.758.360.386 | 5.241.639.614 | -0.1624705791  | 1.783.753.014 | -1.773.188.233 | 1.322.681.141 |
| 6.800.000.191 | -5.077.663.422 | -4.739.962.578 | -0.3377012014   | -2.900.009.632 | 5.099.990.368 | -0.2804866135  | 1.771.951.294 | -1.559.466.124 | 1.344.053.364 |
| 6.849.999.905 | -5.534.709.930 | -4.679.526.806 | -0.8551830053   | -2.998.881.340 | 5.001.118.660 | -0.3914651573  | 1.760.853.577 | -1.289.180.517 | 1.371.081.924 |
| 6.900.000.095 | -5.372.144.699 | -4.526.230.335 | -0.8459146023   | -3.064.207.554 | 4.935.792.446 | -0.4964114428  | 1.750.358.772 | -0.9656113386  | 1.403.438.854 |

|               |                |                |                |                |               |                |               |                |               |
|---------------|----------------|----------------|----------------|----------------|---------------|----------------|---------------|----------------|---------------|
| 6.949.999.809 | -4.470.736.027 | -4.278.186.321 | -0.1925497651  | -3.082.227.468 | 4.917.772.293 | -0.5891183615  | 1.741.088.104 | -0.6068405509  | 1.439.315.987 |
| 7.000.000.000 | -4.253.028.870 | -3.946.197.271 | -0.3068313897  | -3.052.404.642 | 4.947.595.596 | -0.6671417356  | 1.733.285.904 | -0.2266508937  | 1.477.334.881 |
| 7.050.000.191 | -3.626.475.573 | -3.543.080.330 | -0.08340000361 | -2.975.019.693 | 5.024.980.545 | -0.7284241915  | 1.727.157.593 | 0.1603633910   | 1.516.036.320 |
| 7.099.999.905 | -3.649.406.672 | -3.083.140.850 | -0.5662658215  | -2.851.168.633 | 5.148.831.367 | -0.7713537216  | 1.722.864.532 | 0.5393814445   | 1.553.938.103 |
| 7.150.000.095 | -3.072.672.129 | -2.581.610.918 | -0.4910613000  | -2.682.750.463 | 5.317.249.298 | -0.7948096991  | 1.720.519.066 | 0.8959493637   | 1.589.594.936 |
| 7.199.999.809 | -2.256.912.470 | -2.054.073.334 | -0.2028391361  | -2.472.436.190 | 5.527.564.049 | -0.7981948256  | 1.720.180.511 | 1.216.557.860  | 1.621.655.846 |
| 7.250.000.000 | -2.179.702.759 | -1.515.898.585 | -0.6638040543  | -2.223.625.422 | 5.776.374.817 | -0.7814528942  | 1.721.854.782 | 1.489.179.730  | 1.648.917.961 |
| 7.300.000.191 | -0.1275609881  | -0.9817133546  | 0.8541523814   | -1.940.387.726 | 6.059.612.274 | -0.7450704575  | 1.725.492.859 | 1.703.744.769  | 1.670.374.489 |
| 7.349.999.905 | -0.9146181941  | -0.4649227262  | -0.4496954381  | -1.627.392.650 | 6.372.607.231 | -0.6900634766  | 1.730.993.652 | 1.852.533.340  | 1.685.253.334 |
| 7.400.000.095 | -0.6011999249  | 0.03150000051  | -0.6327370405  | -1.283.224.463 | 6.716.775.417 | -0.6175608039  | 1.738.243.866 | 1.932.322.383  | 1.693.232.155 |
| 7.449.999.809 | 1.084.592.700  | 0.4928134084   | 0.5917792916   | -0.9159647822  | 7.084.035.397 | -0.5286967754  | 1.747.130.394 | 1.937.474.966  | 1.693.747.520 |
| 7.500.000.000 | 1.021.949.768  | 0.9089559317   | 0.1129939035   | -0.5331058502  | 7.466.894.150 | -0.4258893430  | 1.757.411.003 | 1.867.951.155  | 1.686.795.044 |
| 7.550.000.191 | 1.629.186.273  | 1.274.063.945  | 0.3551223278   | -0.1412695944  | 7.858.730.316 | -0.3119791746  | 1.768.802.071 | 1.727.312.803  | 1.672.731.209 |
| 7.599.999.905 | 1.964.941.144  | 1.584.589.958  | 0.3803510964   | 0.2527456880   | 8.252.745.628 | -0.1901179552  | 1.780.988.121 | 1.521.962.285  | 1.652.196.312 |
| 7.650.000.095 | 2.601.503.849  | 1.839.265.585  | 0.7622382641   | 0.6420924067   | 8.642.092.705 | -0.06369999796 | 1.793.630.028 | 1.260.850.072  | 1.626.085.091 |
| 7.699.999.809 | 2.751.175.404  | 2.038.931.131  | 0.7122442722   | 1.020.002.484  | 9.020.002.365 | 0.06390000135  | 1.806.389.999 | 0.9550772905   | 1.595.507.717 |
| 7.750.000.000 | 3.243.458.509  | 2.186.279.774  | 1.057.178.855  | 1.379.914.761  | 9.379.915.237 | 0.1889543980   | 1.818.895.531 | 0.6174105406   | 1.561.741.066 |
| 7.800.000.191 | 1.753.004.670  | 2.285.533.190  | -0.5325284600  | 1.715.599.060  | 9.715.599.060 | 0.3082023859   | 1.830.820.274 | 0.2617315352   | 1.526.173.115 |
| 7.849.999.905 | 3.217.509.270  | 2.342.067.003  | 0.8754421473   | 2.021.274.328  | 1.002.127.457 | 0.4183475375   | 1.841.834.831 | -0.09759999812 | 1.490.240.002 |
| 7.900.000.095 | 3.455.926.418  | 2.368.033.171  | 1.087.893.248  | 2.299.520.731  | 1.029.952.049 | 0.5185762048   | 1.851.857.567 | -0.4500637949  | 1.454.993.629 |
| 7.949.999.809 | 3.136.580.229  | 2.364.678.860  | 0.7719013691   | 2.541.608.095  | 1.054.160.786 | 0.6051139832   | 1.860.511.398 | -0.7820432186  | 1.421.795.654 |
| 8.000.000.000 | 3.820.808.887  | 2.334.433.317  | 1.486.375.451  | 2.738.685.131  | 1.073.868.561 | 0.6743100286   | 1.867.431.068 | -1.078.561.902 | 1.392.143.822 |
| 8.050.000.191 | 2.827.633.619  | 2.283.407.450  | 0.5442261696   | 2.887.236.595  | 1.088.723.660 | 0.7242634296   | 1.872.426.414 | -1.328.092.694 | 1.367.190.742 |
| 8.100.000.381 | 2.975.410.461  | 2.217.119.217  | 0.7582913041   | 2.984.670.401  | 1.098.467.064 | 0.7536485195   | 1.875.364.876 | -1.521.199.942 | 1.347.879.982 |
| 8.149.999.619 | 1.714.940.548  | 2.140.209.436  | -0.4252688289  | 3.029.368.162  | 1.102.936.840 | 0.7617527246   | 1.876.175.308 | -1.650.911.570 | 1.334.908.867 |
| 8.199.999.809 | 1.448.041.797  | 2.056.230.068  | -0.6081883311  | 3.020.717.144  | 1.102.071.762 | 0.7484954596   | 1.874.849.510 | -1.712.982.655 | 1.328.701.782 |
| 8.250.000.000 | 2.207.986.116  | 1.967.512.608  | 0.2404734194   | 2.959.121.227  | 1.095.912.170 | 0.7144273520   | 1.871.442.795 | -1.706.036.091 | 1.329.396.439 |
| 8.300.000.191 | 2.158.898.115  | 1.875.120.878  | 0.2837771475   | 2.845.991.373  | 1.084.599.113 | 0.6607100368   | 1.866.070.938 | -1.631.580.353 | 1.336.841.965 |
| 8.350.000.381 | 2.165.714.979  | 1.778.891.802  | 0.3868231773   | 2.683.714.867  | 1.068.371.487 | 0.5890772939   | 1.858.907.700 | -1.493.900.299 | 1.350.609.970 |
| 8.399.999.619 | 1.510.447.741  | 1.676.110.387  | -0.1656626463  | 2.476.511.002  | 1.047.651.100 | 0.5016943812   | 1.850.169.373 | -1.302.095.056 | 1.369.790.459 |
| 8.449.999.809 | 2.573.579.550  | 1.564.995.050  | 1.008.584.499  | 2.226.826.191  | 1.022.682.571 | 0.4006625712   | 1.840.066.338 | -1.062.493.920 | 1.393.750.572 |
| 8.500.000.000 | 2.055.377.245  | 1.444.707.036  | 0.6106703281   | 1.937.966.108  | 9.937.966.347 | 0.2889512777   | 1.828.895.187 | -0.7822104096  | 1.421.778.965 |
| 8.550.000.191 | 3.005.834.818  | 1.312.204.957  | 1.693.629.742  | 1.615.560.889  | 9.615.560.532 | 0.1699474901   | 1.816.994.667 | -0.4733034372  | 1.452.669.621 |
| 8.600.000.381 | 3.452.949.047  | 1.164.199.710  | 2.288.749.218  | 1.265.875.459  | 9.265.875.816 | 0.04720000178  | 1.804.719.925 | -0.1489086300  | 1.485.109.138 |
| 8.649.999.619 | 1.856.259.584  | 0.9974866509   | 0.8587729335   | 0.8956808448   | 8.895.680.428 | -0.07549999654 | 1.792.449.951 | 0.1773346812   | 1.517.733.479 |

|               |                 |                |                |                |               |                |               |                |               |
|---------------|-----------------|----------------|----------------|----------------|---------------|----------------|---------------|----------------|---------------|
| 8.699.999.809 | 1.467.260.718   | 0.8092827201   | 0.6579779983   | 0.5121154189   | 8.512.115.479 | -0.1947054863  | 1.780.529.404 | 0.4918728173   | 1.549.187.279 |
| 8.750.000.000 | 1.657.984.138   | 0.5975469351   | 1.060.437.083  | 0.1225394830   | 8.122.539.520 | -0.3068095148  | 1.769.318.962 | 0.7818169594   | 1.578.181.648 |
| 8.800.000.191 | 1.336.035.967   | 0.3612668514   | 0.9747691751   | -0.2656152844  | 7.734.384.537 | -0.4086048603  | 1.759.139.442 | 1.035.487.056  | 1.603.548.622 |
| 8.850.000.381 | 2.214.828.491   | 0.1006939188   | 2.114.134.789  | -0.6449972391  | 7.355.002.880 | -0.4972053468  | 1.750.279.427 | 1.242.896.557  | 1.624.289.703 |
| 8.899.999.619 | 0.97171719555   | -0.1832899153  | 1.155.061.841  | -1.011.283.755 | 6.988.716.125 | -0.5710796714  | 1.742.892.075 | 1.399.073.601  | 1.639.907.455 |
| 8.949.999.809 | 0.3048689663    | -0.4899124205  | 0.7947813869   | -1.361.595.869 | 6.638.403.893 | -0.6291737556  | 1.737.082.672 | 1.500.857.234  | 1.650.085.640 |
| 9.000.000.000 | -0.002550000092 | -0.8139904737  | 0.8114405870   | -1.684.631.228 | 6.315.368.652 | -0.6681956649  | 1.733.180.428 | 1.538.836.360  | 1.653.883.553 |
| 9.050.000.191 | -0.6226476431   | -1.149.538.159 | 0.5268903971   | -1.974.310.279 | 6.025.689.602 | -0.6871466041  | 1.731.285.286 | 1.511.918.783  | 1.651.191.902 |
| 9.100.000.381 | -1.385.998.249  | -1.489.088.058 | 0.1030897498   | -2.225.243.568 | 5.774.756.432 | -0.6856541038  | 1.731.434.631 | 1.421.809.554  | 1.642.181.015 |
| 9.149.999.619 | -1.496.159.315  | -1.823.902.845 | 0.3277436495   | -2.432.839.394 | 5.567.160.606 | -0.6639784575  | 1.733.602.142 | 1.272.914.767  | 1.627.291.489 |
| 9.199.999.809 | -2.043.269.873  | -2.144.266.605 | 0.1009968072   | -2.593.394.756 | 5.406.605.244 | -0.6229990721  | 1.737.700.081 | 1.072.127.104  | 1.607.212.639 |
| 9.250.000.000 | -3.817.956.209  | -2.439.845.562 | -1.378.110.647 | -2.704.167.604 | 5.295.832.634 | -0.5641812682  | 1.743.581.963 | 0.8285032511   | 1.582.850.361 |
| 9.300.000.191 | -2.908.047.199  | -2.700.101.376 | -0.2079458386  | -2.763.427.258 | 5.236.572.742 | -0.4895239174  | 1.751.047.516 | 0.5528497100   | 1.555.284.977 |
| 9.350.000.381 | -3.894.320.250  | -2.914.741.278 | -0.979589123   | -2.770.485.640 | 5.229.514.122 | -0.4014911354  | 1.759.850.883 | 0.2572354078   | 1.525.723.553 |
| 9.399.999.619 | -2.246.574.402  | -3.076.555.967 | 0.8299816251   | -2.727.638.721 | 5.272.361.279 | -0.3030002415  | 1.769.700.050 | -0.04589999840 | 1.495.409.966 |
| 9.449.999.809 | -5.284.092.903  | -3.182.502.985 | -2.101.589.918 | -2.640.569.687 | 5.359.430.313 | -0.1968890429  | 1.780.311.012 | -0.3450442553  | 1.465.495.586 |
| 9.500.000.000 | -2.944.930.792  | -3.216.184.139 | 0.2712534666   | -2.503.918.409 | 5.496.081.352 | -0.08590000123 | 1.791.410.065 | -0.6263579726  | 1.437.364.197 |
| 9.550.000.191 | -3.511.739.016  | -3.172.040.224 | -0.3396987915  | -2.320.587.397 | 5.679.412.842 | 0.02649999969  | 1.802.650.070 | -0.8779701591  | 1.412.203.026 |
| 9.600.000.381 | -4.020.844.460  | -3.046.859.026 | -0.9739854336  | -2.094.400.406 | 5.905.599.594 | 0.1369474679   | 1.813.694.763 | -1.089.406.013 | 1.391.059.399 |
| 9.649.999.619 | -3.554.701.328  | -2.840.030.909 | -0.7146705985  | -1.830.020.785 | 6.169.979.095 | 0.2420385927   | 1.824.203.873 | -1.252.048.612 | 1.374.795.151 |
| 9.699.999.809 | -3.957.828.999  | -2.553.701.878 | -1.404.127.121 | -1.532.851.219 | 6.467.148.781 | 0.3386464715   | 1.833.864.594 | -1.359.497.070 | 1.364.050.293 |
| 9.750.000.000 | -3.197.069.645  | -2.192.817.688 | -1.004.251.957 | -1.208.920.240 | 6.791.079.521 | 0.4239243269   | 1.842.392.349 | -1.407.821.774 | 1.359.217.834 |
| 9.800.000.191 | -0.6232491136   | -1.765.052.915 | 1.141.803.741  | -0.8647552729  | 7.135.244.846 | 0.4954099953   | 1.849.541.092 | -1.395.707.607 | 1.360.429.192 |
| 9.850.000.381 | -2.534.504.890  | -1.280.625.582 | -1.253.879.428 | -0.5072450638  | 7.492.754.936 | 0.5510995388   | 1.855.109.978 | -1.324.480.057 | 1.367.551.994 |
| 9.899.999.619 | -2.214.463.234  | -0.7510070205  | -1.463.456.273 | -0.1430152208  | 7.856.984.615 | 0.5898594260   | 1.858.985.901 | -1.197.851.300 | 1.380.214.882 |
| 9.949.999.809 | 1.171.008.468   | -0.1812062860  | 1.352.214.813  | 0.2263443768   | 8.226.344.109 | 0.6133079529   | 1.861.330.795 | -1.020.858.645 | 1.397.914.124 |
| 1.000.000.000 | 1.347.808.123   | 0.4056475163   | 0.9421605468   | 0.5911077857   | 8.591.107.368 | 0.6178330183   | 1.861.783.218 | -0.8032932878  | 1.419.670.677 |
| 1.005.000.019 | 0.4709119499    | 0.9921733737   | -0.5212614536  | 0.9440327287   | 8.944.032.669 | 0.6033968329   | 1.860.339.737 | -0.5552561879  | 1.444.474.411 |
| 1.010.000.038 | 2.045.589.685   | 1.560.666.919  | 0.4849228859   | 1.278.118.849  | 9.278.119.087 | 0.5705586672   | 1.857.055.855 | -0.2880105972  | 1.471.198.940 |
| 1.014.999.962 | 2.188.653.946   | 2.093.741.655  | 0.09489999712  | 1.586.751.580  | 9.586.751.938 | 0.5204537511   | 1.852.045.441 | -0.01350000035 | 1.498.649.979 |
| 1.019.999.981 | 1.382.515.311   | 2.574.964.523  | -1.192.449.212 | 1.863.838.673  | 9.863.838.196 | 0.4547537863   | 1.845.475.388 | 0.2563720047   | 1.525.637.245 |
| 1.025.000.000 | 2.596.824.408   | 2.989.457.607  | -0.3926331103  | 2.103.934.765  | 1.010.393.524 | 0.3756106198   | 1.837.561.035 | 0.5099121928   | 1.550.991.249 |
| 1.030.000.019 | 1.638.211.250   | 3.324.444.294  | -1.686.233.163 | 2.302.353.144  | 1.030.235.291 | 0.2855843008   | 1.828.558.350 | 0.7365069389   | 1.573.650.742 |
| 1.035.000.038 | 1.858.857.989   | 3.569.714.546  | -1.710.856.557 | 2.455.260.992  | 1.045.526.123 | 0.1875587851   | 1.818.755.913 | 0.9268946052   | 1.592.689.419 |
| 1.039.999.962 | 3.065.045.118   | 3.717.990.637  | -0.6529455781  | 2.559.756.994  | 1.055.975.723 | 0.08460000157  | 1.808.460.045 | 1.073.585.987  | 1.607.358.551 |

1.044.999.981 1.346.768.737 3.765.182.734 -2.418.414.116 2.613.928.795 1.061.392.879 -0.01989999972 1.798.010.063 1.171.161.532 1.617.116.165  
1.050.000.000 1.292.237.878 3.710.518.599 -2.418.280.602 2.616.890.430 1.061.688.995 -0.1228410974 1.787.715.912 1.216.469.049 1.621.646.881  
1.055.000.019 2.988.064.766 3.556.546.688 -0.5684820414 2.568.797.112 1.056.879.711 -0.2209676504 1.777.903.175 1.208.717.346 1.620.871.735  
1.060.000.038 2.696.170.807 3.309.015.036 -0.6128443480 2.470.839.262 1.047.083.950 -0.3112838268 1.768.871.689 1.149.459.720 1.614.945.984  
1.064.999.962 4.381.251.812 2.976.625.919 1.404.626.012 2.325.213.194 1.032.521.343 -0.3910621107 1.760.893.822 1.042.474.747 1.604.247.475  
1.069.999.981 1.741.722.822 2.570.685.863 -0.8289631009 2.135.072.947 1.013.507.271 -0.4579353034 1.754.206.467 0.8935483098 1.589.354.801  
1.075.000.000 0.6507942677 2.104.660.749 -1.453.866.601 1.904.459.953 9.904.459.953 -0.5099687576 1.749.003.220 0.7101696134 1.571.016.979  
1.080.000.019 2.916.425.943 1.593.657.255 1.322.768.569 1.638.215.899 9.638.216.019 -0.5457176566 1.745.428.276 0.5011591315 1.550.115.871  
1.085.000.038 0.5830841660 1.053.853.631 -0.4707694352 1.341.878.176 9.341.877.937 -0.5642679334 1.743.573.189 0.2762433589 1.527.624.321  
1.089.999.962 0.2405190766 0.5019022822 -0.2613832355 1.021.561.742 9.021.561.623 -0.5652596951 1.743.474.007 0.04560000077 1.504.559.994  
1.094.999.981 -3.577.373.981 -0.05389999971 -3.523.498.297 0.6802141666 8.680.213.928 -0.5504472256 1.744.955.254 -0.1836425364 1.481.635.761  
1.100.000.000 -1.782.578.826 -0.5931966901 -1.189.382.076 0.3252022266 8.325.201.988 -0.5184496045 1.748.155.022 -0.3999492824 1.460.005.093  
1.105.000.019 0.1337727755 -1.099.973.559 1.233.746.409 -0.03599999845 7.964.000.225 -0.4702296555 1.752.976.990 -0.5937879682 1.440.621.185  
1.110.000.038 -0.9518088102 -1.560.355.663 0.6085468531 -0.3958348632 7.604.165.077 -0.4074452817 1.759.255.409 -0.7570754886 1.424.292.469  
1.114.999.962 -2.429.634.094 -1.962.539.434 -0.4670945704 -0.7470439672 7.252.955.914 -0.3322145343 1.766.778.564 -0.8832808733 1.411.671.925  
1.119.999.981 -3.592.697.859 -2.297.113.180 -1.295.584.559 -1.082.384.109 6.917.615.891 -0.2470429987 1.775.295.639 -0.9676860571 1.403.231.430  
1.125.000.000 -1.907.134.771 -2.557.296.515 0.6501617432 -1.394.999.027 6.605.000.973 -0.1547393799 1.784.526.062 -1.007.558.107 1.399.244.213  
1.130.000.019 -2.187.700.033 -2.739.068.270 0.5513681173 -1.678.519.607 6.321.480.274 -0.05829999960 1.794.169.998 -1.002.227.545 1.399.777.222  
1.135.000.038 -2.295.608.521 -2.841.180.086 0.5455715656 -1.927.197.456 6.072.802.544 0.03909999877 1.803.910.065 -0.9530684352 1.404.693.127  
1.139.999.962 -0.2874050140 -2.865.062.714 2.577.657.700 -2.136.024.952 5.863.975.048 0.1343500167 1.813.434.982 -0.8633878231 1.413.661.194  
1.144.999.981 -4.531.208.992 -2.814.628.839 -1.716.580.153 -2.300.839.186 5.699.160.576 0.2244371921 1.822.443.771 -0.7382268310 1.426.177.311  
1.150.000.000 -1.282.224.059 -2.695.988.178 1.413.764.119 -2.418.407.917 5.581.592.083 0.3065085411 1.830.650.902 -0.5840887427 1.441.591.167  
1.155.000.019 -4.120.145.798 -2.517.088.652 -1.603.057.027 -2.486.494.541 5.513.505.459 0.3780118227 1.837.801.170 -0.4086058140 1.459.139.442  
1.160.000.038 -0.6236402392 -2.287.303.686 1.663.663.507 -2.503.902.674 5.496.097.565 0.4367623031 1.843.676.186 -0.2201633155 1.477.983.665  
1.164.999.962 -2.222.046.375 -2.016.984.940 -0.2050613761 -2.470.497.131 5.529.502.869 0.4810105264 1.848.101.044 -0.02749999985 1.497.249.985  
1.169.999.981 -2.518.073.320 -1.717.001.081 -0.8010723591 -2.387.203.455 5.612.796.783 0.5094953775 1.850.949.478 0.1607071012 1.516.070.747  
1.175.000.000 -2.171.729.803 -1.398.284.435 -0.7734454870 -2.255.983.591 5.744.016.647 0.5214801431 1.852.148.056 0.3362190425 1.533.621.883  
1.180.000.019 -1.520.214.796 -1.071.404.457 -0.4488104582 -2.079.789.400 5.920.210.838 0.5167711973 1.851.677.132 0.4916139543 1.549.161.434  
1.185.000.038 -1.178.872.228 -0.7461854815 -0.4326867461 -1.862.496.972 6.137.503.147 0.4957182705 1.849.571.800 0.6205932498 1.562.059.307  
1.189.999.962 -2.220.191.717 -0.4313839972 -1.788.807.750 -1.608.818.293 6.391.181.946 0.4591968656 1.845.919.609 0.7182374597 1.571.823.788  
1.194.999.981 2.030.331.373 -0.1271301359 2.157.461.405 -1.321.363.688 6.678.636.551 0.4082796276 1.840.827.942 0.7859539390 1.578.595.352  
1.200.000.000 1.735.338.449 0.1552011967 1.580.137.253 -1.006.935.477 6.993.064.404 0.3445624709 1.834.456.253 0.8175742030 1.581.757.450  
1.205.000.019 0.3369000554 0.4079527557 -0.07109999657 -0.6730952859 7.326.904.774 0.2703276277 1.827.032.852 0.8107203841 1.581.072.044  
1.210.000.038 1.739.405.274 0.6276324987 1.111.772.776 -0.3270367980 7.672.963.142 0.1881470531 1.818.814.659 0.7665222883 1.576.652.241  
1.214.999.962 3.067.698.002 0.8124865890 2.255.211.353 0.02380000055 8.023.799.896 0.1008276492 1.810.082.817 0.6878381968 1.568.783.855

|               |                |                |                |                |               |                |               |                 |               |
|---------------|----------------|----------------|----------------|----------------|---------------|----------------|---------------|-----------------|---------------|
| 1.219.999.981 | 1.178.841.591  | 0.9623934627   | 0.2164481431   | 0.3719955385   | 8.371.995.926 | 0.01130000036  | 1.801.129.913 | 0.5790836215    | 1.557.908.344 |
| 1.225.000.000 | 3.043.405.056  | 1.078.685.284  | 1.964.719.772  | 0.7101066113   | 8.710.106.850 | -0.07739999890 | 1.792.259.979 | 0.4459894001    | 1.544.598.961 |
| 1.230.000.019 | 1.770.078.421  | 1.163.907.886  | 0.6061704755   | 1.031.034.470  | 9.031.034.470 | -0.1624288708  | 1.783.757.019 | 0.2953023314    | 1.529.530.239 |
| 1.235.000.038 | 4.532.047.272  | 1.221.535.802  | 3.310.511.589  | 1.328.074.574  | 9.328.074.455 | -0.2409825474  | 1.775.901.794 | 0.1344437599    | 1.513.444.328 |
| 1.239.999.962 | 4.186.297.417  | 1.255.659.580  | 2.930.637.598  | 1.595.081.449  | 9.595.081.329 | -0.3105657995  | 1.768.943.405 | -0.02889999934  | 1.497.109.985 |
| 1.244.999.981 | -0.7770729661  | 1.270.662.904  | -2.047.735.929 | 1.826.599.360  | 9.826.599.121 | -0.3690055609  | 1.763.099.480 | -0.1869309247   | 1.481.306.934 |
| 1.250.000.000 | 2.601.945.400  | 1.270.907.283  | 1.331.038.356  | 2.017.976.522  | 1.001.797.676 | -0.4145303071  | 1.758.547.020 | -0.3325388730   | 1.466.746.140 |
| 1.255.000.019 | 1.828.201.175  | 1.260.441.303  | 0.5677598715   | 2.165.461.063  | 1.016.546.059 | -0.4458243251  | 1.755.417.633 | -0.4591954350   | 1.454.080.486 |
| 1.260.000.038 | 2.887.135.983  | 1.242.749.810  | 1.644.386.292  | 2.266.277.313  | 1.026.627.731 | -0.4620655477  | 1.753.793.526 | -0.5614619851   | 1.443.853.760 |
| 1.264.999.962 | -0.02529999986 | 1.220.554.113  | -1.245.889.187 | 2.318.678.379  | 1.031.867.790 | -0.4629463553  | 1.753.705.406 | -0.6351779699   | 1.436.482.239 |
| 1.269.999.981 | 2.310.096.025  | 1.195.673.943  | 1.114.422.202  | 2.321.976.662  | 1.032.197.666 | -0.4486763179  | 1.755.132.294 | -0.6776263118   | 1.432.237.339 |
| 1.275.000.000 | 4.112.071.991  | 1.168.955.922  | 2.943.116.188  | 2.276.550.055  | 1.027.655.029 | -0.4199675620  | 1.758.003.235 | -0.6876266599   | 1.431.237.316 |
| 1.280.000.019 | -0.3335152864  | 1.140.270.352  | -1.473.785.639 | 2.183.825.493  | 1.018.382.549 | -0.3780029416  | 1.762.199.783 | -0.6655523777   | 1.433.444.786 |
| 1.285.000.038 | 1.687.965.870  | 1.108.575.702  | 0.5793901682   | 2.046.238.422  | 1.004.623.795 | -0.3243889809  | 1.767.561.150 | -0.6132736802   | 1.438.672.638 |
| 1.289.999.962 | 1.260.567.069  | 1.072.044.253  | 0.1885229647   | 1.867.169.499  | 9.867.169.380 | -0.2610948682  | 1.773.890.495 | -0.5340304971   | 1.446.596.909 |
| 1.294.999.981 | 3.629.634.619  | 1.028.066.039  | 2.601.568.699  | 1.650.743.127  | 9.650.743.484 | -0.1901272684  | 1.780.987.358 | -0.4325498641   | 1.456.745.052 |
| 1.300.000.000 | -1.497.137.904 | 0.9729978442   | -2.470.135.689 | 1.400.877.953  | 9.400.877.953 | -0.1137988269  | 1.788.620.186 | -0.3140813112   | 1.468.591.881 |
| 1.305.000.019 | 2.330.108.881  | 0.9038381577   | 1.426.270.723  | 1.123.082.757  | 9.123.083.115 | -0.03480000049 | 1.796.520.042 | -0.1843957454   | 1.481.560.421 |
| 1.310.000.038 | -5.597.028.732 | 0.8178482652   | -6.414.876.938 | 0.8236311078   | 8.823.631.287 | 0.04399999976  | 1.804.400.063 | -0.04980000108  | 1.495.020.008 |
| 1.314.999.962 | 0.6925708055   | 0.7127003670   | -0.02009999938 | 0.5092209578   | 8.509.221.077 | 0.1201722696   | 1.812.017.250 | 0.08330000192   | 1.508.329.964 |
| 1.319.999.981 | -0.6805767417  | 0.5867164135   | -1.267.293.215 | 0.1868223697   | 8.186.821.938 | 0.1910713464   | 1.819.107.056 | 0.2088227272    | 1.520.882.225 |
| 1.325.000.000 | 1.065.066.099  | 0.4390765131   | 0.6259896159   | -0.1364803761  | 7.863.519.669 | 0.2544220388   | 1.825.442.123 | 0.3211348355    | 1.532.113.457 |
| 1.330.000.019 | -0.5827972293  | 0.2699842155   | -0.8527814746  | -0.4536477327  | 7.546.352.386 | 0.3082169294   | 1.830.821.609 | 0.4154149890    | 1.541.541.481 |
| 1.335.000.038 | -0.9010722041  | 0.08079999685  | -0.9818520546  | -0.7578414679  | 7.242.158.413 | 0.3508064151   | 1.835.080.719 | 0.4878149033    | 1.548.781.490 |
| 1.339.999.962 | 0.7603015304   | -0.1260062903  | 0.8863078356   | -1.042.575.359 | 6.957.424.641 | 0.3809493482   | 1.838.094.902 | 0.5356197953    | 1.553.561.974 |
| 1.344.999.981 | -0.5317981839  | -0.3466647267  | -0.1851334572  | -1.301.856.995 | 6.698.143.005 | 0.3978488147   | 1.839.784.813 | 0.5573434234    | 1.555.734.348 |
| 1.350.000.000 | -3.184.154.510 | -0.5763815641  | -2.607.773.066 | -1.530.316.353 | 6.469.683.647 | 0.4011721015   | 1.840.117.264 | 0.5527626276    | 1.555.276.299 |
| 1.355.000.019 | 0.8045723438   | -0.8093757033  | 1.613.948.107  | -1.723.319.769 | 6.276.679.993 | 0.3910539150   | 1.839.105.415 | 0.5228901505    | 1.552.289.009 |
| 1.360.000.038 | -3.396.549.463 | -1.039.092.183 | -2.357.457.399 | -1.877.066.374 | 6.122.933.388 | 0.3680838048   | 1.836.808.395 | 0.4698904157    | 1.546.989.059 |
| 1.364.999.962 | -2.828.237.295 | -1.258.443.594 | -1.569.793.820 | -1.988.663.673 | 6.011.336.327 | 0.3332776129   | 1.833.327.675 | 0.3969424367    | 1.539.694.214 |
| 1.369.999.981 | -2.391.883.850 | -1.460.088.611 | -0.9317952394  | -2.056.182.861 | 5.943.817.139 | 0.2880348861   | 1.828.803.444 | 0.3080594540    | 1.530.805.969 |
| 1.375.000.000 | -2.397.866.011 | -1.636.734.247 | -0.7611317635  | -2.078.691.721 | 5.921.308.517 | 0.2340838760   | 1.823.408.318 | 0.2078736126    | 1.520.787.334 |
| 1.380.000.019 | -0.4426259995  | -1.781.449.080 | 1.338.823.080  | -2.056.263.208 | 5.943.737.030 | 0.1734156758   | 1.817.341.614 | 0.1013984829    | 1.510.139.847 |
| 1.385.000.038 | -2.490.957.975 | -1.887.971.759 | -0.6029860377  | -1.989.963.412 | 6.010.036.469 | 0.1082110181   | 1.810.821.152 | -0.006219999865 | 1.499.378.014 |
| 1.389.999.962 | -1.263.044.238 | -1.951.001.048 | 0.6879569292   | -1.881.814.837 | 6.118.185.043 | 0.04080000147  | 1.804.080.009 | -0.1099476963   | 1.489.005.184 |



1.394.999.981 0.4767519236 -1.968.831.778 2.445.583.582 -1.736.164.331 6.263.835.907 -0.02720000036 1.797.279.930 -0.2055107653 1.479.448.891  
1.400.000.000 -2.203.559.875 -1.937.368.631 -0.2661911547 -1.554.905.176 6.445.095.062 -0.09350000322 1.790.649.986 -0.2889185846 1.471.108.150  
1.405.000.019 -1.360.891.342 -1.852.400.184 0.4915087521 -1.340.391.636 6.659.608.364 -0.1556999832 1.784.429.932 -0.3563085794 1.464.369.106  
1.410.000.038 -3.237.477.303 -1.714.272.141 -1.523.205.042 -1.097.711.682 6.902.288.437 -0.2115360051 1.778.846.359 -0.4050244391 1.459.497.547  
1.414.999.962 -0.3862202466 -1.525.145.888 1.138.925.672 -0.8325545788 7.167.445.183 -0.2592189610 1.774.078.178 -0.4333724082 1.456.662.750  
1.419.999.981 1.304.570.556 -1.288.974.643 2.593.545.198 -0.5510753393 7.448.924.541 -0.2972275317 1.770.277.214 -0.4406717718 1.455.932.808  
1.425.000.000 0.7192493081 -1.011.407.495 1.730.656.743 -0.2597500682 7.740.250.111 -0.3244017363 1.767.559.814 -0.4272557497 1.457.274.437  
1.430.000.019 0.1867585033 -0.6996261477 0.8863846660 0.03480000049 8.034.799.576 -0.3399778306 1.766.002.274 -0.3944236040 1.460.557.652  
1.435.000.038 -2.511.756.420 -0.3621180952 -2.149.638.414 0.3258389831 8.325.839.043 -0.3436088860 1.765.639.114 -0.3443481922 1.465.565.205  
1.439.999.962 3.773.406.744 -0.008399999700 3.781.805.038 0.6069164276 8.606.916.428 -0.3353703022 1.766.462.898 -0.2799445391 1.472.005.558  
1.444.999.981 -0.1571193635 0.3513116539 -0.5084310174 0.8717689514 8.871.768.951 -0.3157499731 1.768.424.988 -0.2047073543 1.479.529.285  
1.450.000.000 -0.3237424195 0.7064341903 -1.030.176.640 1.114.584.565 9.114.584.923 -0.2856245339 1.771.437.454 -0.1225258783 1.487.747.383  
1.455.000.019 0.8924869299 1.046.399.951 -0.1539129615 1.330.107.689 9.330.107.689 -0.2462218404 1.775.377.846 -0.03750000149 1.496.249.962  
1.460.000.038 0.3420808315 1.361.013.174 -1.018.932.343 1.513.754.368 9.513.753.891 -0.1990718246 1.780.092.812 0.04630000144 1.504.629.993  
1.464.999.962 1.525.388.002 1.640.804.648 -0.1154167801 1.661.711.931 9.661.711.693 -0.1459474713 1.785.405.159 0.1250403523 1.512.504.005  
1.469.999.981 3.152.927.160 1.877.355.337 1.275.571.823 1.771.018.147 9.771.018.028 -0.08879999816 1.791.119.957 0.1951353550 1.519.513.512  
1.475.000.000 4.692.755.222 2.063.581.705 2.629.173.756 1.839.622.259 9.839.622.498 -0.02969999984 1.797.030.067 0.2536376715 1.525.363.731  
1.480.000.019 3.504.070.997 2.193.971.157 1.310.099.602 1.866.421.580 9.866.421.700 0.02930000052 1.802.930.069 0.2982221842 1.529.822.254  
1.485.000.038 1.415.363.431 2.264.759.302 -0.8493959904 1.851.277.709 9.851.277.351 0.08619999886 1.808.620.071 0.3273042440 1.532.730.389  
1.489.999.962 -0.7828283906 2.274.042.130 -3.056.870.461 1.795.009.255 9.795.009.613 0.1389441639 1.813.894.463 0.3400887549 1.534.008.884  
1.494.999.981 -0.4571232498 2.223.991.156 -2.681.114.435 1.700.686.693 9.700.686.455 0.1863137484 1.818.631.363 0.3369907439 1.533.699.036  
1.500.000.000 2.143.206.120 2.115.764.618 0.02740000002 1.570.358.396 9.570.358.276 0.2270274013 1.822.702.789 0.3183787763 1.531.837.845  
1.505.000.019 -0.4517230690 1.948.764.443 -2.400.487.423 1.404.811.740 9.404.811.859 0.2591349185 1.825.913.429 0.2848177552 1.528.481.770  
1.510.000.038 5.914.575.577 1.728.161.812 4.186.413.765 1.208.110.452 9.208.110.809 0.2816270888 1.828.162.766 0.2384242564 1.523.842.430  
1.514.999.962 -2.025.364.161 1.460.751.414 -3.486.115.694 0.9850175977 8.985.017.776 0.2938523591 1.829.385.185 0.1818814725 1.518.188.190  
1.519.999.981 1.289.695.263 1.154.702.306 0.1349930614 0.7408792973 8.740.879.059 0.2955346704 1.829.553.413 0.1182883233 1.511.828.804  
1.525.000.000 1.514.931.560 0.8192654252 0.6956660748 0.4814949334 8.481.494.904 0.2867778838 1.828.677.750 0.05099999905 1.505.099.964  
1.530.000.019 -3.531.856.775 0.4644513726 -3.996.308.088 0.2129783332 8.212.978.363 0.2680560350 1.826.805.687 -0.01659999974 1.498.340.034  
1.535.000.038 -2.867.592.812 0.1006894633 -2.968.282.223 -0.05840000138 7.941.599.846 0.2401909083 1.824.019.051 -0.08110000193 1.491.889.954  
1.539.999.962 -0.3892474174 -0.2615176737 -0.1277297586 -0.3263023496 7.673.697.472 0.2043169141 1.820.431.709 -0.1395322233 1.486.046.791  
1.544.999.981 -0.7805607319 -0.6119312644 -0.1686294973 -0.5845901966 7.415.410.042 0.1618355662 1.816.183.472 -0.1891766489 1.481.082.344  
1.550.000.000 1.419.609.904 -0.9408939481 2.360.503.912 -0.8273498416 7.172.650.337 0.1143610701 1.811.436.081 -0.2279051542 1.477.209.473  
1.555.000.019 -1.705.909.371 -1.239.616.275 -0.4662931263 -1.049.088.240 6.950.911.522 0.06369999796 1.806.369.972 -0.2541870177 1.474.581.337  
1.560.000.038 -1.522.051.573 -1.500.423.789 -0.02160000056 -1.244.846.344 6.755.153.656 0.01159999985 1.801.160.049 -0.2671576738 1.473.284.245  
1.564.999.962 -9.104.599.953 -1.716.957.450 -7.387.642.384 -1.410.312.176 6.589.687.824 -0.03999999911 1.795.999.908 -0.2666391432 1.473.336.124

1.569.999.981 -1.132.337.928 -1.884.322.047 0.7519841790 -1.541.916.132 6.458.084.106 -0.08929999918 1.791.069.984 -0.2531254888 1.474.687.481  
1.575.000.000 -4.017.154.694 -1.999.180.913 -2.017.973.900 -1.636.908.531 6.363.091.469 -0.1345373690 1.786.546.326 -0.2277351171 1.477.226.448  
1.580.000.019 1.899.198.532 -2.059.795.141 3.958.993.673 -1.693.417.549 6.306.582.451 -0.1742437780 1.782.575.607 -0.1921337545 1.480.786.610  
1.585.000.038 -5.758.698.940 -2.066.010.475 -3.692.688.704 -1.710.485.935 6.289.514.065 -0.2070918977 1.779.290.771 -0.1484325528 1.485.156.727  
1.589.999.962 -0.3598146439 -2.019.193.649 1.659.378.886 -1.688.084.364 6.311.915.398 -0.2320416272 1.776.795.769 -0.09910000116 1.490.089.989  
1.594.999.981 1.566.012.025 -1.922.556.400 3.488.568.544 -1.627.353.430 6.372.646.332 -0.2484165430 1.775.158.310 -0.04679999873 1.495.320.034  
1.600.000.000 -1.498.504.043 -1.780.345.201 0.2818412781 -1.530.174.613 6.469.825.268 -0.2558406591 1.774.415.970 0.005669999868 1.500.566.959  
1.604.999.924 2.496.922.493 -1.596.501.589 4.093.424.320 -1.398.485.541 6.601.514.339 -0.2540551126 1.774.594.498 0.05600000173 1.505.599.976  
1.610.000.038 -0.4103055894 -1.376.987.576 0.9666820765 -1.235.652.447 6.764.347.553 -0.2432862669 1.775.671.387 0.1019510776 1.510.195.065  
1.614.999.962 0.06599999964 -1.128.484.964 1.194.502.950 -1.045.741.916 6.954.257.965 -0.2240787297 1.777.592.087 0.1413356364 1.514.133.549  
1.620.000.076 -5.622.281.551 -0.8581764698 -4.764.104.843 -0.8334187865 7.166.581.154 -0.1972700655 1.780.273.056 0.1725123972 1.517.251.205  
1.625.000.000 -2.619.220.257 -0.5735264421 -2.045.693.874 -0.6038310528 7.396.168.709 -0.1639553756 1.783.604.431 0.1942599416 1.519.425.964  
1.629.999.924 0.3194686770 -0.2820673883 0.6015360951 -0.3624837697 7.637.516.022 -0.1254431903 1.787.455.750 0.2058595866 1.520.585.918  
1.635.000.038 3.193.779.230 0.008799999952 3.184.977.055 -0.1151062399 7.884.893.894 -0.08320000023 1.791.679.955 0.2071127594 1.520.711.231  
1.639.999.962 2.679.591.894 0.2920017540 2.387.590.170 0.1324855536 8.132.485.390 -0.03880000114 1.796.120.071 0.1983323991 1.519.833.279  
1.645.000.076 2.195.196.867 0.5609327555 1.634.263.992 0.3745267987 8.374.526.978 0.006099999882 1.800.609.970 0.1803092510 1.518.030.930  
1.650.000.000 6.771.321.297 0.8096171618 5.961.704.254 0.6054394841 8.605.439.186 0.049899999905 1.804.990.005 0.1542559117 1.515.425.587  
1.654.999.924 -1.060.413.718 1.032.810.450 -2.093.224.049 0.8199622631 8.819.962.502 0.09109999985 1.809.110.069 0.1217321008 1.512.173.176  
1.660.000.038 1.391.117.454 1.226.088.285 0.1650291830 1.013.271.451 9.013.271.332 0.1282613426 1.812.826.157 0.08460000157 1.508.460.045  
1.664.999.962 1.060.657.859 1.385.905.743 -0.3252479136 1.181.090.355 9.181.090.355 0.1601121128 1.816.011.238 0.04470000044 1.504.469.967  
1.670.000.076 4.384.726.048 1.509.631.395 2.875.094.652 1.319.784.641 9.319.784.164 0.1856375486 1.818.563.843 0.004209999926 1.500.421.047  
1.675.000.000 2.299.891.472 1.595.557.928 0.7043335438 1.426.442.146 9.426.442.146 0.2040543705 1.820.405.388 -0.03489999846 1.496.510.029  
1.679.999.924 2.670.051.813 1.642.890.215 1.027.161.837 1.498.932.719 9.498.932.838 0.2148501873 1.821.484.947 -0.07090000063 1.492.910.004  
1.685.000.038 -0.7648204565 1.651.715.636 -2.416.536.093 1.535.951.138 9.535.951.614 0.2177964747 1.821.779.633 -0.1020319983 1.489.796.829  
1.689.999.962 1.113.620.639 1.622.957.110 -0.5093364120 1.537.038.565 9.537.038.803 0.2129511982 1.821.295.166 -0.1270326972 1.487.296.772  
1.695.000.076 0.9037539363 1.558.362.007 -0.6546080709 1.502.673.745 9.502.674.103 0.2006648034 1.820.066.452 -0.1449764818 1.485.502.338  
1.700.000.000 -4.072.231.770 1.460.301.042 -5.532.532.692 1.434.150.219 9.434.150.696 0.1815391332 1.818.153.954 -0.1553881615 1.484.461.212  
1.704.999.924 1.746.854.901 1.331.564.426 0.4152905047 1.333.094.120 9.333.093.643 0.1563396454 1.815.633.965 -0.1578693688 1.484.213.066  
1.710.000.038 0.9483131766 1.175.739.884 -0.2274266779 1.202.240.705 9.202.240.944 0.1260951161 1.812.609.482 -0.1525959969 1.484.740.448  
1.714.999.962 4.779.942.036 0.9968763172 3.783.068.419 1.044.996.262 9.044.996.262 0.09200000018 1.809.199.905 -0.1401174664 1.485.988.235  
1.720.000.076 1.597.035.527 0.7993758917 0.7976595759 0.8653495312 8.865.349.770 0.05530000106 1.805.529.976 -0.1213156581 1.487.868.404  
1.725.000.000 -4.947.725.773 0.5879263878 -5.535.652.161 0.6677708030 8.667.770.386 0.01750000007 1.801.749.992 -0.09730000049 1.490.270.042  
1.729.999.924 0.5211048722 0.3673789203 0.1537259370 0.4570999444 8.457.099.915 -0.02009999938 1.797.990.036 -0.06960000098 1.493.039.989  
1.735.000.038 -0.3318405747 0.1426673383 -0.4745078981 0.2384271473 8.238.427.162 -0.05620000139 1.794.379.997 -0.03950000182 1.496.049.976  
1.739.999.962 -5.012.844.086 -0.08129999787 -4.931.556.702 0.01700000092 8.017.000.198 -0.08950000256 1.791.049.957 -0.008720000274 1.499.127.960

|               |                |                |               |                |               |                |               |               |               |
|---------------|----------------|----------------|---------------|----------------|---------------|----------------|---------------|---------------|---------------|
| 1.745.000.076 | 5.034.356.594  | -0.2996661067  | 5.334.022.522 | -0.2020550966  | 7.797.945.023 | -0.1188959628  | 1.788.110.352 | 0.02129999921 | 1.502.130.032 |
| 1.750.000.000 | 1.516.700.029  | 1.516.700.029  | 0.000000000   | -0.4135508239  | 7.586.449.146 | -0.1433617473  | 1.785.663.795 | 0.04910000041 | 1.504.909.992 |
| 1.754.999.924 | -3.087.639.809 | -3.087.639.809 | 0.000000000   | -0.6126644611  | 7.387.335.777 | -0.1621624380  | 1.783.783.722 | 0.07339999825 | 1.507.339.954 |
| 1.760.000.038 | -3.414.232.016 | -3.414.232.016 | 0.000000000   | -0.7948969007  | 7.205.102.921 | -0.1747525781  | 1.782.524.681 | 0.09309999645 | 1.509.309.959 |
| 1.764.999.962 | 1.699.209.929  | 1.699.209.929  | 0.000000000   | -0.9562059045  | 7.043.794.155 | -0.1808228791  | 1.781.917.763 | 0.1075584367  | 1.510.755.825 |
| 1.770.000.076 | -2.746.459.007 | -2.746.459.007 | 0.000000000   | -1.093.096.018 | 6.906.904.221 | -0.1803061813  | 1.781.969.452 | 0.1161873564  | 1.511.618.710 |
| 1.775.000.000 | -3.377.865.314 | -3.377.865.314 | 0.000000000   | -1.202.694.654 | 6.797.305.107 | -0.1733743250  | 1.782.662.582 | 0.1188228577  | 1.511.882.305 |
| 1.779.999.924 | 0.2605868280   | 0.2605868280   | 0.000000000   | -1.282.811.642 | 6.717.188.358 | -0.1604264826  | 1.783.957.291 | 0.1155816466  | 1.511.558.151 |
| 1.785.000.038 | -4.038.563.251 | -4.038.563.251 | 0.000000000   | -1.331.982.851 | 6.668.017.387 | -0.1420694292  | 1.785.793.114 | 0.1068639308  | 1.510.686.398 |
| 1.789.999.962 | -7.466.978.550 | -7.466.978.550 | 0.000000000   | -1.349.494.815 | 6.650.505.066 | -0.1190905869  | 1.788.090.897 | 0.09329999983 | 1.509.329.987 |
| 1.795.000.076 | -8.083.069.801 | -8.083.069.801 | 0.000000000   | -1.335.720.658 | 6.664.279.461 | -0.09239999950 | 1.790.760.040 | 0.07580000162 | 1.507.579.994 |
| 1.800.000.000 | -2.493.727.207 | -2.493.727.207 | -3,16E-07     | -1.292.040.825 | 6.707.959.175 | -0.06279999763 | 1.793.720.055 | 0.05499999970 | 1.505.500.031 |
