# Supplementary material
Source: PubMed Central journal article supplement (PMC8325642)
Supplement: NIHMS1698257-supplement-Supplementary_Fig5_B_Insertase_pH6_FT_EXAFS_pdf.pdf [file NIHMS1698257-supplement-Supplementary_Fig5_B_Insertase_pH6_FT_EXAFS_pdf.pdf]

| R            | Insertase-pH6 | Fit           | Mo-Oxo        | Mo-O          | Mo-S           |
|--------------|---------------|---------------|---------------|---------------|----------------|
| 0.000000000  | 0.5547950864  | 0.5338196158  | 0.6079494238  | 0.629875004   | 0.1467230022   |
| 0.0307000000 | 0.4392228723  | 0.4872076809  | 0.6613588333  | 0.1325199008  | 0.1557245553   |
| 0.0614000001 | 0.3334890902  | 0.4033105671  | 0.4990762174  | 0.1056762934  | 0.1548294872   |
| 0.0920000001 | 0.2919982672  | 0.2976953685  | 0.2993508279  | 0.07729999721 | 0.1493332386   |
| 0.1227184609 | 0.3485680819  | 0.1985052079  | 0.0825000328  | 0.0573000138  | 0.1397777349   |
| 0.153398017  | 0.455550387   | 0.1682545185  | 0.1361973435  | 0.0590000036  | 0.1272999876   |
| 0.1840776950 | 0.5660161972  | 0.2344356030  | 0.3313922882  | 0.07710000128 | 0.1134081036   |
| 0.2147573084 | 0.6520262957  | 0.3271766901  | 0.4905090928  | 0.09669999778 | 0.09989999980  |
| 0.2454369366 | 0.7025591731  | 0.4068920314  | 0.6010656953  | 0.1103536710  | 0.088799999816 |
| 0.2761165500 | 0.7126708031  | 0.4599118531  | 0.6556549072  | 0.1151308790  | 0.082099999651 |
| 0.3067961633 | 0.6829050779  | 0.4815251827  | 0.6521928310  | 0.1101041734  | 0.08110000193  |
| 0.3374757767 | 0.6181944880  | 0.4721013010  | 0.5940557895  | 0.09570000321 | 0.08540000021  |
| 0.3681553900 | 0.5338439345  | 0.4361405075  | 0.4900621176  | 0.07360000163 | 0.09309999645  |
| 0.3988350034 | 0.4481274486  | 0.3820953965  | 0.3551460505  | 0.04639999941 | 0.1014999673   |
| 0.4295146167 | 0.3945554793  | 0.3226953745  | 0.2167846560  | 0.02119999938 | 0.108410399    |
| 0.4601942301 | 0.4030593336  | 0.2751230597  | 0.1546295732  | 0.02730000019 | 0.1120489910   |
| 0.4908738434 | 0.5545953218  | 0.2701662183  | 0.3546637893  | 0.07460000366 | 0.1045745537   |
| 0.5215534568 | 0.6376724839  | 0.3016559184  | 0.4474889338  | 0.08940000087 | 0.09279999882  |
| 0.5522330999 | 0.6979419589  | 0.3347659409  | 0.5005538464  | 0.09520000219 | 0.07670000196  |
| 0.5829126835 | 0.7288194299  | 0.3611214161  | 0.5095109344  | 0.09120000154 | 0.05930000171  |
| 0.6135923266 | 0.7297851443  | 0.379396157   | 0.4785119593  | 0.07769999653 | 0.04749999940  |
| 0.642719102  | 0.7056211369  | 0.3955295621  | 0.4214901064  | 0.05109999970 | 0.05110000074  |
| 0.6749515533 | 0.6725337505  | 0.4139640927  | 0.3671213388  | 0.02830000035 | 0.06769999862  |
| 0.7056311369 | 0.6451887488  | 0.4390086532  | 0.3547998667  | 0.00319999919 | 0.08749999851  |
| 0.7363107800 | 0.6438903809  | 0.4690344334  | 0.4038726389  | 0.03469999880 | 0.1040429175   |
| 0.7669903636 | 0.6786013842  | 0.4971621037  | 0.4878950715  | 0.06350000203 | 0.1140357628   |
| 0.7976700068 | 0.7435520291  | 0.5687938997  | 0.5687938997  | 0.08649999648 | 0.1153914619   |
| 0.8283496499 | 0.8222336173  | 0.5103670359  | 0.6192797422  | 0.1010868624  | 0.1071655378   |
| 0.8590292335 | 0.8967222571  | 0.4805032015  | 0.6227355599  | 0.1054512635  | 0.08959999681  |
| 0.8897088766 | 0.9528661966  | 0.4240616262  | 0.5716512799  | 0.09860000014 | 0.06430000067  |
| 0.9203884602 | 0.9816724062  | 0.3515968919  | 0.4690715671  | 0.08070000261 | 0.03730000183  |
| 0.9510681033 | 0.9793201685  | 0.2968498468  | 0.3384849429  | 0.05290000141 | 0.03409999982  |
| 0.9817476869 | 0.9468499422  | 0.219108140   | 0.219108140   | 0.01830000058 | 0.06469999728  |
| 1.012427330  | 0.8897041678  | 0.430569299   | 0.3815638125  | 0.02529999986 | 0.09899999946  |
| 1.043104914  | 0.8176001726  | 0.585386078   | 0.5990751982  | 0.06639999896 | 0.1291957051   |
| 1.073786616  | 0.7408805490  | 0.7418163419  | 0.8283526301  | 0.1053102612  | 0.1503964663   |
| 1.104466200  | 0.6747326255  | 0.8721908331  | 1.024961710   | 0.1374740303  | 0.1595517844   |
| 1.135145783  | 0.6327906847  | 0.9538134336  | 1.137400250   | 0.1591767669  | 0.1549238712   |
| 1.165825367  | 0.628400164   | 0.9671984149  | 1.199562154   | 0.1674119882  | 0.1364662051   |
| 1.196504951  | 0.8955953717  | 1.130730987   | 1.602359563   | 0.1070283428  |                |
| 1.227184653  | 0.8063639998  | 0.7267196774  | 0.9361514449  | 0.1370389014  | 0.07720000297  |
| 1.257864237  | 1.015546322   | 0.4527871013  | 0.6097327471  | 0.09920000285 | 0.067899999789 |
| 1.288543940  | 1.315993786   | 0.08030000329 | 0.1753731221  | 0.05330000073 | 0.1185550466   |
| 1.319223523  | 1.707382917   | 0.462950829   | 0.04693999941 | 0.1756139249  |                |
| 1.349903107  | 1.2183692217  | 1.007219315   | 1.159214735   | 0.1048453003  | 0.2318383753   |
| 1.380582690  | 1.733741760   | 1.674679041   | 1.941226602   | 0.1733193547  | 0.2784268856   |
| 1.411262274  | 2.405504227   | 2.79257774    | 2.79257774    | 0.2379472256  | 0.3089120090   |
| 1.441941857  | 3.987043619   | 3.176070452   | 3.637595415   | 0.2913399339  | 0.3183485568   |
| 1.472621560  | 4.646623611   | 3.959760904   | 4.478357792   | 0.3273220658  | 0.3035271168   |
| 1.503301144  | 5.294564724   | 5.294564724   | 5.294564724   | 0.3409423505  | 0.2835878623   |
| 1.533990846  | 5.904172421   | 5.452607632   | 5.955697536   | 0.3292493522  | 0.2015717626   |
| 1.564660430  | 6.449210644   | 6.105264664   | 6.522946835   | 0.2930321395  | 0.1316739321   |
| 1.595340014  | 6.905305862   | 6.660817623   | 6.937990189   | 0.2418702841  | 0.1145199165   |
| 1.626019597  | 7.251263618   | 7.097515583   | 7.181140423   | 0.2091619670  | 0.1981621236   |
| 1.656699300  | 7.470211506   | 7.398210526   | 7.241164207   | 0.2541034818  | 0.3173510194   |
| 1.687378883  | 7.550497532   | 7.551098824   | 7.115912914   | 0.3811093995  | 0.4391663074   |
| 1.718058467  | 7.486283302   | 7.550172329   | 6.812393665   | 0.5547036529  | 0.5485448241   |
| 1.748738050  | 7.277806759   | 7.395362377   | 6.346229273   | 0.7505318522  | 0.6341316104   |
| 1.779417753  | 6.931294918   | 7.092400074   | 5.740991592   | 0.9546664357  | 0.6867445111   |
| 1.810097337  | 6.458553314   | 6.652425766   | 5.026132384   | 1.155656099   | 0.7002219558   |
| 1.840776920  | 5.876284599   | 6.091423035   | 4.235851103   | 1.343252420   | 0.6736370325   |
| 1.871456623  | 5.205225945   | 5.429590225   | 3.406822443   | 1.508215785   | 0.6161867976   |
| 1.902136207  | 4.469267368   | 4.690835953   | 2.576218605   | 1.642543912   | 0.5580475330   |
| 1.932815790  | 3.694866419   | 3.902801991   | 1.780013919   | 1.739797831   | 0.5625475645   |
| 1.963495374  | 2.911506414   | 3.098424911   | 1.052527547   | 1.795404434   | 0.6917724609   |
| 1.994174957  | 2.155519009   | 2.322160244   | 0.4370498955  | 1.806877375   | 0.9404082894   |
| 2.024854660  | 1.485977292   | 1.651394606   | 0.247906839   | 1.773927927   | 1.257572880    |
| 2.055534363  | 1.040095925   | 1.251148343   | 0.5924591422  | 1.698451757   | 1.639325261    |
| 2.086213827  | 1.044337630   | 1.316635489   | 0.8646354675  | 1.584391952   | 2.030456305    |
| 2.116893530  | 1.413803458   | 1.719473958   | 1.018890500   | 1.437486172   | 2.419955730    |
| 2.147572994  | 1.883016706   | 2.213021994   | 1.059404016   | 1.264916778   | 2.789035320    |
| 2.178252697  | 2.339506626   | 2.746731520   | 0.8596971631  | 0.8761706352  | 3.400305033    |
| 2.208932400  | 3.397513390   | 3.397513390   | 0.6615217924  | 0.6776520610  | 3.615487337    |
| 2.239612103  | 3.66401672    | 3.614407778   | 0.4315102994  | 0.4880028069  | 3.757210732    |
| 2.270291567  | 3.570467710   | 3.732257605   | 0.2077618539  | 0.3157444298  | 3.819873571    |
| 2.300971270  | 3.702293396   | 3.752925396   | 0.1544318646  | 0.1714396626  | 3.801590204    |
| 2.331650734  | 3.485977292   | 3.485977292   | 0.3232372403  | 0.08640000024 | 3.704224566    |
| 2.362330437  | 3.751838923   | 3.527088642   | 0.4862234495  | 0.1154706106  | 3.533233867    |
| 2.393009901  | 3.674312353   | 3.299693823   | 0.6039980054  | 0.1712447554  | 3.297262430    |
| 2.423699604  | 3.534657478   | 3.012409210   | 0.675938964   | 0.2074828148  | 3.007712603    |
| 2.454369307  | 3.340011835   | 2.679560184   | 0.6758968234  | 0.2194789201  | 2.677983522    |
| 2.485049009  | 3.09702835    | 2.316384792   | 0.6329800487  | 0.2091810256  | 2.322766781    |
| 2.515728474  | 2.825101852   | 1.938389659   | 0.5471017361  | 0.18054418961 | 1.9575444515   |
| 2.546408176  | 2.529231071   | 1.560684443   | 0.4300987422  | 0.1389898270  | 1.596315622    |
| 2.577087641  | 2.226112366   | 1.197318196   | 0.2979391515  | 0.09030000120 | 1.253909945    |
| 2.607767344  | 1.929832935   | 0.8606637716  | 0.1780514568  | 0.04399999976 | 0.9424757957   |
| 2.638447046  | 1.653287292   | 0.5608850718  | 0.1418287456  | 0.03759999946 | 0.6727844477   |
| 2.669126511  | 1.406545043   | 0.3055287302  | 0.2146012634  | 0.07370000333 | 0.4543116391   |

|             |               |               |               |                |                |
|-------------|---------------|---------------|---------------|----------------|----------------|
| 2.791845083 | 1.194963336   | 0.09929999709 | 0.3031097949  | 0.1078800336   | 0.2964043319   |
| 2.822524548 | 1.152173160   | 0.07193999969 | 0.3701733053  | 0.1321563572   | 0.2071276903   |
| 2.853204250 | 0.8672037721  | 0.1634204537  | 0.4058073163  | 0.1445266157   | 0.1767775863   |
| 2.883883953 | 0.7321997285  | 0.2249983847  | 0.4077356160  | 0.1448109150   | 0.1684036851   |
| 2.914563417 | 0.6007140279  | 0.2486698925  | 0.3778645992  | 0.1340126246   | 0.1539226025   |
| 2.945243120 | 0.4639510512  | 0.2440125495  | 0.3212656677  | 0.1140936464   | 0.1287870854   |
| 2.975922585 | 0.3180573285  | 0.2233965695  | 0.2458756995  | 0.08789999783  | 0.1062395796   |
| 3.006602287 | 0.1651031771  | 0.2019715221  | 0.1438161400  | 0.05939999968  | 0.1118976474   |
| 3.037281990 | 0.04490000010 | 0.1944652409  | 0.1015657485  | 0.03660000116  | 0.1502072364   |
| 3.067961693 | 0.1669412106  | 0.2068930864  | 0.1121422201  | 0.03640000150  | 0.2003640234   |
| 3.098641157 | 0.3131842315  | 0.2306839973  | 0.1711560339  | 0.05449999869  | 0.2470555902   |
| 3.129320860 | 0.4438239336  | 0.2537183464  | 0.2285785377  | 0.07320000231  | 0.2822269499   |
| 3.160000324 | 0.5505314469  | 0.2669529319  | 0.2689999640  | 0.08640000224  | 0.3016374111   |
| 3.190690027 | 0.6271656555  | 0.2655440867  | 0.2874662280  | 0.09239999950  | 0.3035438061   |
| 3.221359730 | 0.6723152399  | 0.2479285896  | 0.2829946280  | 0.09080000222  | 0.2881656885   |
| 3.252039194 | 0.6834250689  | 0.2149711102  | 0.2572370172  | 0.08229999989  | 0.2573238015   |
| 3.282718897 | 0.6628339887  | 0.1693100035  | 0.2140389979  | 0.06800000370  | 0.2140884548   |
| 3.313398600 | 0.6146863103  | 0.1147961468  | 0.1594954314  | 0.04989999905  | 0.1624137461   |
| 3.344078064 | 0.5453783870  | 0.0560000173  | 0.1038624272  | 0.03089999966  | 0.11068075001  |
| 3.374757767 | 0.4634751976  | 0.00286999968 | 0.0720999859  | 0.01889999956  | 0.05240000039  |
| 3.405437231 | 0.3799034059  | 0.0560000173  | 0.09380000085 | 0.02649999969  | 0.01689999923  |
| 3.436116934 | 0.3084164560  | 0.1007836089  | 0.1374952346  | 0.04120000079  | 0.04839999974  |
| 3.466796637 | 0.2643278539  | 0.1339557171  | 0.1763014197  | 0.05389999971  | 0.08030000329  |
| 3.497476101 | 0.2557262182  | 0.1537877470  | 0.2019745260  | 0.06210000068  | 0.1010427997   |
| 3.528158044 | 0.2723212679  | 0.1598317474  | 0.2116705626  | 0.06499999762  | 0.1094004363   |
| 3.558835506 | 0.2989188731  | 0.1529631764  | 0.2050636560  | 0.06260000169  | 0.1058817208   |
| 3.589514971 | 0.3196664652  | 0.1354122460  | 0.1836651266  | 0.05550000072  | 0.09210000187  |
| 3.620194674 | 0.3307821751  | 0.1109573618  | 0.1506146044  | 0.04459999874  | 0.07090000063  |
| 3.650874376 | 0.3307731450  | 0.08569999784 | 0.1109448075  | 0.03139999881  | 0.047710000008 |
| 3.681553841 | 0.3224384785  | 0.07000000030 | 0.07379999750 | 0.01850000024  | 0.03330000117  |
| 3.712233543 | 0.3099497259  | 0.07339999825 | 0.05950000137 | 0.01389999967  | 0.04520000145  |
| 3.742913008 | 0.2977265120  | 0.09070000052 | 0.07970000058 | 0.02250000089  | 0.06819999963  |
| 3.773592710 | 0.2888642550  | 0.1100878567  | 0.1104992181  | 0.03319999948  | 0.08940000087  |
| 3.804272413 | 0.2839263082  | 0.1245209724  | 0.1366071254  | 0.04170000181  | 0.1046419293   |
| 3.834952116 | 0.2809325457  | 0.1309567988  | 0.1528567225  | 0.04670000076  | 0.1122044101   |
| 3.865631590 | 0.2746134739  | 0.1283898930  | 0.1574337035  | 0.04789999872  | 0.1115267128   |
| 3.896311283 | 0.2680113018  | 0.1171883717  | 0.1503042430  | 0.04520000145  | 0.1029584333   |
| 3.926990747 | 0.2536167204  | 0.09880000353 | 0.1327834427  | 0.03909999877  | 0.08760000020  |
| 3.957670450 | 0.2339212149  | 0.07599999756 | 0.1074318215  | 0.03050000034  | 0.06729999930  |
| 3.988349915 | 0.2115806788  | 0.05319999903 | 0.07840000000 | 0.02030000091  | 0.04479999840  |
| 4.019029617 | 0.1911825836  | 0.04010000080 | 0.05370000005 | 0.01109999977  | 0.02600000054  |
| 4.049709320 | 0.1780214339  | 0.04639999907 | 0.04879999906 | 0.01070000045  | 0.02620000020  |
| 4.080389023 | 0.1751813143  | 0.06360000372 | 0.06589999795 | 0.01860000007  | 0.04210000113  |
| 4.111068726 | 0.1807453930  | 0.08009999990 | 0.08810000122 | 0.02659999952  | 0.05820000172  |
| 4.141747952 | 0.1887717338  | 0.09149999917 | 0.1061918288  | 0.03260000050  | 0.06979999691  |
| 4.174227654 | 0.1927294880  | 0.09640000015 | 0.1168949777  | 0.03590000048  | 0.07569999993  |
| 4.205107357 | 0.1975500289  | 0.10949999779 | 0.1190312877  | 0.03629999980  | 0.07530000061  |
| 4.233787060 | 0.1701352447  | 0.08619999886 | 0.1126873195  | 0.03390000015  | 0.06920000166  |
| 4.264466763 | 0.1392035335  | 0.07289999723 | 0.09889999777 | 0.02899999917  | 0.05810000002  |
| 4.295145988 | 0.09520000219 | 0.05689999834 | 0.07949999720 | 0.02239999920  | 0.04349999875  |
| 4.325825691 | 0.04160000011 | 0.04149999842 | 0.05750000104 | 0.01489999983  | 0.02759999968  |
| 4.356505394 | 0.03700000048 | 0.03299999982 | 0.03810000047 | 0.00860000292  | 0.01600000076  |
| 4.387185097 | 0.1058465362  | 0.03649999946 | 0.03649999847 | 0.00869999850  | 0.02060000040  |
| 4.417864799 | 0.1812427640  | 0.04670000076 | 0.04450000077 | 0.01460000034  | 0.03330000117  |
| 4.448544502 | 0.2566611767  | 0.05660000071 | 0.06030000001 | 0.02019999921  | 0.04470000044  |
| 4.479223728 | 0.3283413947  | 0.06319999695 | 0.07320000231 | 0.02419999987  | 0.05270000175  |
| 4.509903431 | 0.3932440877  | 0.06520000100 | 0.08079999685 | 0.02630000003  | 0.05629999936  |
| 4.540583134 | 0.4490505755  | 0.06260000169 | 0.08240000159 | 0.02620000020  | 0.05550000072  |
| 4.571262836 | 0.4942617118  | 0.05590000004 | 0.07819999754 | 0.02410000004  | 0.05050000176  |
| 4.601942539 | 0.5282458663  | 0.04630000144 | 0.06899999827 | 0.02030000091  | 0.04210000113  |
| 4.632621765 | 0.5512103438  | 0.03559999913 | 0.05629999936 | 0.01530000009  | 0.03130000085  |
| 4.663301468 | 0.5640907884  | 0.02720000036 | 0.04250000045 | 0.00980000016  | 0.01960000023  |
| 4.693981171 | 0.5683671236  | 0.02549999952 | 0.03150000051 | 0.00577999974  | 0.01080000028  |
| 4.724660873 | 0.5658231974  | 0.03079999983 | 0.02869999968 | 0.00725999988  | 0.01360000018  |
| 4.75340576  | 0.5582830310  | 0.03819999844 | 0.03480000049 | 0.01159999985  | 0.02239999920  |
| 4.786020279 | 0.5473701954  | 0.04430000111 | 0.04340000078 | 0.01559999958  | 0.02999999933  |
| 4.816699505 | 0.5343427658  | 0.04769999906 | 0.05029999837 | 0.01840000041  | 0.03510000184  |
| 4.847379208 | 0.5200458765  | 0.04780000076 | 0.05380000174 | 0.01970000006  | 0.03700000048  |
| 4.878058910 | 0.5049940944  | 0.04470000044 | 0.05330000073 | 0.01940000057  | 0.03590000048  |
| 4.908738613 | 0.4895099779  | 0.03800000114 | 0.04899999812 | 0.01779999956  | 0.03200000152  |
| 4.939418316 | 0.474111805   | 0.03109999932 | 0.04149999842 | 0.01489999983  | 0.02580000088  |
| 4.970098019 | 0.4594146311  | 0.02290000021 | 0.03200000152 | 0.01130000036  | 0.01850000024  |
| 5.000777245 | 0.4462938309  | 0.01640000008 | 0.02229999937 | 0.00734000011  | 0.01180000044  |
| 5.031456947 | 0.4358626604  | 0.01520000026 | 0.01630000025 | 0.004430000205 | 0.01009999961  |
| 5.062136650 | 0.4261037017  | 0.01520000091 | 0.01879999973 | 0.005059999879 | 0.01470000017  |
| 5.092816353 | 0.4265621006  | 0.02419999987 | 0.02590000071 | 0.00780000102  | 0.02040000074  |
| 5.123495579 | 0.4280738533  | 0.02810000069 | 0.03290000185 | 0.01030000020  | 0.02500000037  |
| 5.154175282 | 0.4326961339  | 0.02999999933 | 0.03790000081 | 0.01200000010  | 0.02759999968  |
| 5.184854984 | 0.4388709068  | 0.02969999984 | 0.04019999877 | 0.01260000002  | 0.02800000086  |
| 5.215534687 | 0.4447367191  | 0.02749999985 | 0.03959999979 | 0.01209999993  | 0.02630000003  |
| 5.246214390 | 0.448463768   | 0.02530000055 | 0.03629999980 | 0.01070000045  | 0.02260000072  |
| 5.276894093 | 0.4484693110  | 0.01950000040 | 0.03099999949 | 0.008449999616 | 0.01750000007  |
| 5.307573318 | 0.4436423779  | 0.01579999924 | 0.02439999953 | 0.005679999944 | 0.01169999968  |
| 5.338253021 | 0.4333331883  | 0.01420000009 | 0.01759999990 | 0.002769999905 | 0.006703000007 |
| 5.368932724 | 0.4173929095  | 0.01530000009 | 0.01279999968 | 0.001679999987 | 0.006430000067 |
| 5.399612427 | 0.3961334527  | 0.01779999956 | 0.01290000044 | 0.004000000190 | 0.01049999986  |
| 5.430292130 | 0.02099999938 | 0.02099999938 | 0.01632999957 | 0.00632999971  | 0.01460000034  |
| 5.460971832 | 0.3409178853  | 0.02150000073 | 0.02089999989 | 0.008080000058 | 0.01759999990  |
| 5.491651058 | 0.3094644547  | 0.02170000039 | 0.02390000038 | 0.009080000222 | 0.01899999939  |
| 5.522330761 | 0.2776419222  | 0.02060000040 | 0.02529999986 | 0.009300000034 | 0.01879999973  |
| 5.553010464 | 0.2474758327  | 0.01850000024 | 0.02490000054 | 0.008750000037 | 0.01710000075  |
| 5.583690166 | 0.2212520838  | 0.01579999924 | 0.02280000038 | 0.007540000137 | 0.01410000026  |

5.614369869 0.2013140172 0.0131000010 0.01930000074 0.00579999926 0.01030000020  
5.645049095 0.1895272538 0.01109099977 0.01480000000 0.00371800077 0.00627999986  
5.675728798 0.1864896268 0.01049999986 0.009850000031 0.00150000013 0.00392000046  
5.706408501 0.1911152452 0.01109999977 0.00555999961 0.0009350000182 0.00586999994  
5.737088203 0.2011376172 0.01219999976 0.004809999838 0.002850000048 0.009130000137  
5.767767906 0.2140794098 0.01290000044 0.007759999949 0.004470000044 0.01190000027  
5.798447609 0.2279110104 0.01310000010 0.0190000011 0.005640000105 0.01360000018  
5.821926835 0.2412080306 0.01240000036 0.01199999993 0.006289999932 0.01420000009  
5.859806538 0.2531928122 0.01109999977 0.01439999975 0.006399999838 0.01370000001  
5.890486240 0.2633704543 0.009370000102 0.01449999958 0.006000000052 0.01209999993  
5.921165943 0.2716315389 0.007569999900 0.01360000018 0.005169999786 0.0097200000438  
5.951845646 0.2780381441 0.006240000017 0.01169999968 0.004009999800 0.006800000090  
5.982524872 0.2827685475 0.005890000146 0.009200000204 0.002649999922 0.003800000064  
6.013204575 0.2860566676 0.006440000143 0.006289999932 0.00121000017 0.002180000069  
6.043884277 0.2881452739 0.007259999868 0.00326999987 0.000193999929 0.003909999970  
6.074563980 0.2892524600 0.007849999703 0.001040000003 0.001419999986 0.006180000026  
6.105243683 0.2895505726 0.007950000465 0.002850000048 0.002420000033 0.007939999923  
6.135923386 0.2891577780 0.007490000222 0.005049999803 0.003109999932 0.008969999850  
6.166602612 0.2881416976 0.00650000134 0.006750000175 0.003479999956 0.009189999662  
6.197282314 0.2865335047 0.005129999947 0.007860000245 0.003520000027 0.008659999818  
6.227962017 0.2843495309 0.003670000006 0.008379999548 0.003269999987 0.007449999917  
6.258641720 0.2816168666 0.002779999981 0.008340000175 0.002779999981 0.005729999859  
6.289321423 0.2783975601 0.003269999987 0.007849999703 0.002110000001 0.003680000082  
6.320000648 0.2748054862 0.004619999799 0.007050000131 0.001350000035 0.005100000013  
6.350680351 0.2710100114 0.004029999936 0.0069999982 0.000579999923 0.006280000089  
6.381360054 0.2672214210 0.007189999800 0.005169999786 0.000211999990 0.002520000096  
6.412039757 0.2636558414 0.007939999923 0.004439999815 0.0008200000157 0.004040000029  
6.442719460 0.2604830861 0.0082200000193 0.004000000190 0.001300000004 0.005100000184  
6.473398685 0.2577675581 0.008019999601 0.003800000064 0.001629999955 0.00569999792  
6.504078388 0.2554184794 0.003680000163 0.003680000082 0.001780000050 0.005700000096  
6.534758091 0.2531658411 0.006279999856 0.003490000032 0.001769999973 0.005289999768  
6.565437794 0.2505723834 0.004869999830 0.003160000080 0.001629999955 0.004499999806  
6.596117496 0.2470806390 0.003229999915 0.002760000061 0.001410000026 0.003449999960  
6.626797199 0.2420829833 0.001530000009 0.002499999944 0.001139999949 0.002270000055  
6.657476425 0.2349991351 0.001019999967 0.002670000074 0.0008880000096 0.001139999994  
6.688156128 0.2253471155 0.002540000016 0.003289999906 0.000789999954 0.000769999739  
6.718835831 0.2127993256 0.004129999783 0.004129999783 0.000640999914 0.001470000017  
6.749515533 0.1972220987 0.005470000207 0.004939999897 0.0006530000246 0.002169999979  
6.780195236 0.1787037849 0.006459999830 0.00555999961 0.000678999998 0.002640000092  
6.810874462 0.1575838178 0.007040000055 0.005880000070 0.0006730000023 0.002850000048  
6.841559415 0.1345131695 0.007160000037 0.005830000155 0.0006220000214 0.002790000057  
6.872233868 0.1186179729 0.00681999977 0.005390000064 0.000530000194 0.002520000096  
6.902913570 0.08789999783 0.006080000196 0.004610000178 0.000460000065 0.002099999925  
6.933593273 0.07050000131 0.004999999888 0.003610000014 0.000269999958 0.001590000000  
6.964272976 0.06490000337 0.003770000068 0.002659999998 0.000125000059 0.001069999998  
6.994952202 0.07440000027 0.002730000066 0.002379999962 0.0000000606-05 0.000669999925  
7.026531905 0.09449999779 0.002540000016 0.003120000008 0.0001789999951 0.000670000236  
7.056311607 0.1189046407 0.003310000058 0.004279999994 0.0003190000134 0.0007680000272  
7.086991310 0.1442592442 0.004379999824 0.005390000064 0.0004630000039 0.0009330000030  
7.117671013 0.1685951352 0.005299999844 0.006229999941 0.000609999906 0.001010000007  
7.148350716 0.1906467974 0.005869999994 0.006680000108 0.0007500000065 0.001000000047  
7.179029942 0.2094478756 0.006000000052 0.006670000032 0.0008759999764 0.0009130000253  
7.209709644 0.2242059233 0.005869999868 0.006200000178 0.0009730000165 0.0007740000146  
7.240389347 0.2342989743 0.00488999982 0.00531999997 0.001030000043 0.0006140000187  
7.271069050 0.2392663509 0.003740000073 0.004129999783 0.001040000003 0.000456000089  
7.301748753 0.2389965040 0.002369999886 0.002809999976 0.001000000047 0.000310000031  
7.332427979 0.2332771420 0.001150000026 0.00185999960 0.0009250000003 0.000179999994  
7.363107681 0.2228798866 0.001550000045 0.002129999921 0.000823999979 0.000123999983  
7.393787384 0.208659667 0.00286999968 0.003190000076 0.0007319999859 0.000258999923  
7.424467087 0.1921543479 0.004079999868 0.004240000155 0.0006890000077 0.0004649999901  
7.455146790 0.1756162792 0.004960000049 0.004980000202 0.0007159999805 0.0006939999876  
7.485826015 0.1619522423 0.005419999827 0.005309999920 0.0007980000228 0.0009250000003  
7.516500518 0.1542368978 0.005429999903 0.005179999862 0.0008939999971 0.001139999949  
7.547185421 0.1544700265 0.00499999988 0.004650000017 0.000699999937 0.001329999999  
7.577865124 0.1623174995 0.004250000231 0.003849999979 0.001000000047 0.001479999977  
7.608544827 0.1752711087 0.003409999888 0.003079999937 0.0009820000269 0.001619999995  
7.639224529 0.1900244802 0.003000000026 0.002929999959 0.000989999949 0.001760000014  
7.669903755 0.2035968751 0.003470000112 0.003729999997 0.0007929999847 0.001930000028  
7.700583458 0.2137264609 0.004600000102 0.00509999964 0.0006510000094 0.002139999997  
7.731263161 0.2188756913 0.005890000146 0.006349999922 0.0005199999911 0.002379999962  
7.761942863 0.2181408256 0.007040000055 0.007480000146 0.0004149999877 0.002630000003  
7.792622566 0.2111625224 0.007869999856 0.008279999718 0.0003950000100 0.002859999891  
7.823301792 0.1980496794 0.008290000260 0.008659999818 0.0004379999882 0.003030000022  
7.853981495 0.1793096364 0.008270000108 0.008609999903 0.0004959999933 0.003109999932  
7.884661198 0.1557788986 0.007309999865 0.008159999736 0.000409999957 0.000790999937  
7.915340900 0.1285553426 0.006900000140 0.007379999850 0.0005729999975 0.002940000035  
7.946020603 0.09889999777 0.005890000146 0.006419999991 0.0006099999882 0.002670000074  
7.976700306 0.06849999726 0.004699999932 0.005429999903 0.0006799999974 0.002300000051  
8.007379532 0.03940000013 0.003650000086 0.004629999865 0.0007970000152 0.001850000001  
8.038059235 0.01960000023 0.003070000093 0.004209999926 0.0009560000035 0.001339999959  
8.068738937 0.03020000085 0.003139999928 0.004160000011 0.001139999949 0.000280000184  
8.099418640 0.05169999972 0.003580000019 0.004300000146 0.001309999963 0.000350000104  
8.130098343 0.07159999758 0.004009999800 0.004379999824 0.001460000058 0.000249000043  
8.160778046 0.08789999783 0.004189999774 0.004230000079 0.001560000004 0.000599999980  
8.191457748 0.1002759635 0.004050000105 0.00378999988 0.001619999995 0.0009200000204  
8.222137451 0.1087355912 0.003659999943 0.00349999994 0.001619999995 0.001189999981  
8.252813670 0.1136512576 0.002790000005 0.002099999925 0.001569999964 0.001440000022  
8.283495903 0.1156012565 0.001859999960 0.001260000048 0.001479999977 0.001679999987  
8.314175606 0.1153230071 0.001219999976 0.001500000013 0.001359999995 0.001949999947  
8.344855309 0.1136478409 0.001739999978 0.002619999927 0.001230000053 0.002249999903  
8.375535011 0.1114225835 0.002839999972 0.003839999903 0.001120000030 0.002559999935  
8.406214714 0.1094187126 0.003959999885 0.004920000210 0.001019999967 0.002850000048

8.436894417 0.1082380489 0.004910000134 0.005739999935 0.000931999954 0.003100000089  
8.467574120 0.1082394570 0.005590000093 0.006250000093 0.000479999960 0.001269999987  
8.498253822 0.1095163971 0.005989999976 0.006539999938 0.000747999913 0.003329999978  
8.528933525 0.1113962265 0.006060000043 0.006200000178 0.000617999909 0.003280000063  
8.559613228 0.1152192280 0.005820000079 0.005669999868 0.000452000075 0.003100000089  
8.590291977 0.1190179288 0.005299999844 0.004869999830 0.0002530000056 0.002809999976  
8.620971680 0.1229687184 0.004579999950 0.003860000055 7.550000009e-05 0.002420000033  
8.651651382 0.1267109066 0.003700000001 0.002739999909 0.000260000007 0.001980000023  
8.68231085 0.1298844814 0.002749999985 0.001590000000 0.0005130000063 0.001470000017  
8.713010788 0.1321214736 0.001810000045 0.0004920000210 0.000755999940 0.0009970000247  
8.743690491 0.1330419332 0.0009440000285 0.0005109999911 0.0009699999937 0.0005900000106  
8.774370193 0.1322604865 0.0002320000058 0.001290000044 0.001139999949 0.000381999984  
8.805049896 0.1294043362 0.0004020000051 0.001850000001 0.001260000048 0.0004710000067  
8.835729599 0.1241407096 0.0007730000070 0.002169999922 0.001309999863 0.0006290000165  
8.866409302 0.1162107214 0.000962999986 0.002249999903 0.001309999863 0.0007309999783  
8.897089005 0.1054675132 0.0009950000094 0.002129999921 0.001240000012 0.0007629999891  
8.927767754 0.09189999849 0.0009360000258 0.001850000001 0.001120000030 0.0007580000092  
8.958447456 0.07580000162 0.0009089999949 0.001509999973 0.0009529999807 0.0007730000070  
8.989127159 0.05770000070 0.001049999963 0.001260000048 0.000761999915 0.0008650000091  
9.019806862 0.03920000046 0.001350000035 0.001260000048 0.0005590000073 0.001040000003  
9.050486565 0.02580000088 0.001730000018 0.001520000049 0.0003619999916 0.001270000008  
9.081166267 0.03050000034 0.002099999925 0.001859999960 0.0001909999992 0.001490000053  
9.111845970 0.04910000041 0.002400000114 0.002169999992 0.0001120000015 0.001670000027  
9.142525673 0.07090000063 0.002589999931 0.002369999886 0.0001720000000 0.001780000050  
9.172033376 0.09260000288 0.002459999998 0.002450000029 0.000243999953 0.001799999969  
9.203885078 0.1125199497 0.002589999931 0.002379999962 0.0002830000012 0.001730000018  
9.234563828 0.1299414635 0.002390000038 0.002189999912 0.0002880000102 0.001560000004  
9.265243530 0.1442771554 0.002699999930 0.001900000032 0.0002659999882 0.001309999963  
9.295923233 0.1552632451 0.001649999991 0.001539999968 0.0002320000058 0.0009960000170  
9.326602936 0.1629416794 0.001169999945 0.001129999990 0.0002090000053 0.0006500000018  
9.357282639 0.1676800251 0.0006500000018 0.0007280000136 0.0002209999948 0.0003819999984  
9.387962341 0.1701703817 0.0002340000065 0.0003610000131 0.0002680000034 0.0004720000143  
9.418642044 0.1713836193 0.0005310000270 0.0001869999978 0.0003279999946 0.0007960000075  
9.449321747 0.1724516749 0.001010000007 0.0003670000006 0.0003830000060 0.001129999990  
9.480001450 0.1744626909 0.001499999982 0.0005610000226 0.0004239999980 0.001429999946  
9.510681152 0.1781985611 0.001820000005 0.0006980000180 0.0004429999972 0.001659999951  
9.541360855 0.1839106530 0.002110000001 0.0007789999945 0.0004410000111 0.001820000005  
9.572040558 0.1912460029 0.002309999984 0.0008200000157 0.0004170000029 0.001900000032  
9.602719307 0.1993571818 0.002420000033 0.0008410000009 0.0003769999894 0.001900000032  
9.633399010 0.2071217000 0.002450000029 0.0008599999710 0.0003269999870 0.001829999965  
9.664078712 0.2133650631 0.002400000114 0.0008859999944 0.0002749999985 0.001709999982  
9.694758415 0.2170268148 0.002270000055 0.0009139999747 0.0002329999988 0.001550000045  
9.725438118 0.2172617763 0.002090000082 0.0009309999878 0.0002139999997 0.0013800000031  
9.756117821 0.2134925127 0.001879999996 0.0009229999851 0.0002189999941 0.001200000057  
9.786797523 0.2054325193 0.001649999991 0.0008759999764 0.0002390000009 0.001049999963  
9.817477226 0.1930949539 0.001429999946 0.0007820000174 0.0002600000007 0.0009280000231  
9.848156929 0.1768008769 0.001270000006 0.0004639999914 0.0002739999909 0.0008510000189  
9.878836632 0.1572050303 0.001180000021 0.0004609999887 0.0002749999985 0.0008079999825  
9.909516335 0.1353754848 0.001169999945 0.0002819999936 0.0002629999944 0.0007810000097  
9.940195084 0.1130054295 0.001219999976 0.0002640000021 0.0002419999946 0.0007510000141  
9.970874786 0.09290000051 0.001290000044 0.0004680000129 0.0002189999941 0.0007079999777
