# Supplementary material
Source: PubMed Central journal article supplement (PMC8325642)
Supplement: NIHMS1698257-supplement-Supplementary_Fig5_C_Insertase_pH6_Real_FT_EXAFS_pdf.pdf [file NIHMS1698257-supplement-Supplementary_Fig5_C_Insertase_pH6_Real_FT_EXAFS_pdf.pdf]

| R            | Insertase-pH6  | Fit            | residue        | Mo-Oxo         | Mo-Oxo-5      | Mo-O            | Mo-O-10       | Mo-S           | Mo-S-15       |
|--------------|----------------|----------------|----------------|----------------|---------------|-----------------|---------------|----------------|---------------|
| 0.000000000  | -0.1051106560  | -0.2272799981  | -0.021891630   | -0.0218999989  | -5.0953009773 | 0.0724000017    | 0.0724000037  | -0.04610000367 | -14.09759991  |
| 0.0007000000 | 0.2373245060   | 0.3306617439   | -0.0552399983  | 0.2840104997   | -4.715898590  | -0.006450000219 | -10.00644970  | 0.05310000107  | -14.94690001  |
| 0.0614000001 | 0.4000183642   | 0.4505870640   | -0.0505999973  | 0.4719402790   | -4.528059959  | -0.04610000178  | -10.04609966  | 0.02470000088  | -14.97529984  |
| 0.0920000018 | 0.3026920557   | 0.3976826668   | -0.0949999881  | 0.4679578841   | -4.532042027  | -0.06140000001  | -10.06140041  | -0.00891999935 | -15.00891972  |
| 0.1227184609 | 0.0179999923   | 0.2037907243   | -0.1857807934  | 0.2988190353   | -4.701180935  | -0.05359999835  | -10.05360031  | -0.04149999842 | -15.04100059  |
| 0.1533980817 | -0.2891508341  | -0.0252000003  | -0.2639152110  | 0.07720000297  | -4.922800064  | -0.03539999947  | -10.03540039  | -0.06700000167 | -15.06700039  |
| 0.1840776950 | -0.44547531274 | -0.1657523106  | -0.2791868357  | -0.0579999902  | -5.0529000148 | -0.08219999820  | -10.08220095  | -0.08219999820 | -15.08220095  |
| 0.2147573084 | -0.3550521135  | -0.1414587259  | -0.2135942876  | -0.0241999987  | -5.024199963  | -0.03020000085  | -10.03020000  | -0.08709999919 | -15.08710003  |
| 0.2454369366 | -0.0463999994  | 0.03640000150  | -0.08290000260 | 0.1759212315   | -4.824078560  | -0.05490000173  | -10.05490017  | -0.08460000157 | -15.08460045  |
| 0.2761165500 | 0.3418682218   | 0.2747097313   | 0.06719999760  | 0.4401919544   | -4.559808254  | -0.08669999987  | -10.08670044  | -0.07880000025 | -15.07880020  |
| 0.3067961633 | 0.6289041638   | 0.4461968941   | 0.1827072799   | 0.6295368871   | -4.370463371  | -0.1009955809   | -10.100990557 | -0.07419999689 | -15.07419968  |
| 0.3374757767 | 0.6799811125   | 0.4557438195   | 0.2242372930   | 0.6398313642   | -4.260168457  | -0.1100337207   | -10.11003399  | -0.07410000265 | -15.074100954 |
| 0.3681553900 | 0.4726546109   | 0.2898170550   | 0.1828375310   | 0.4576268196   | -4.542371580  | -0.08920000291  | -10.08920000  | -0.07959999889 | -15.07960033  |
| 0.3988350034 | 0.1085564792   | 0.0241999987   | 0.0842999650   | 0.168259932    | -4.831739902  | -0.0542999903   | -10.05430031  | -0.08969999850 | -15.08969975  |
| 0.4295146167 | -0.2350257933  | -0.2141852826  | -0.02080000006 | -0.08810000122 | -5.088099957  | -0.02520000003  | -10.02519989  | -0.1008611917  | -15.10086155  |
| 0.4601942301 | -0.3907040656  | -0.3126223683  | -0.07810000330 | -0.1897612065  | -5.189761162  | -0.01489999983  | -10.01490021  | -0.1080002168  | -15.10800026  |
| 0.4908738434 | -0.2825874388  | -0.2304321527  | -0.05220000073 | -0.09740000218 | -5.097400188  | -0.02679999918  | -10.02680016  | -0.1062391177  | -15.10623932  |
| 0.5215534568 | 0.03559999913  | -0.02050000057 | 0.05600000173  | 0.124544236    | -4.875453472  | -0.05189999930  | -10.05189991  | -0.09309999645 | -15.09309959  |
| 0.5522330999 | 0.4044518173   | 0.1978582293   | 0.2065935880   | 0.3418570757   | -4.658143044  | -0.07360000163  | -10.07359982  | -0.07039999962 | -15.07040024  |
| 0.5829126835 | 0.6350516081   | 0.3008213043   | 0.3342033038   | 0.4215437770   | -4.578456402  | -0.07660000026  | -10.07660007  | -0.04410000145 | -15.04409981  |
| 0.6135923266 | 0.5999392867   | 0.2255911231   | 0.3743481338   | 0.3038708866   | -4.696129322  | -0.05579999834  | -10.05580044  | -0.02250000089 | -15.02250004  |
| 0.6442719102 | 0.2969160974   | 0.00512999947  | 0.2917868972   | 0.03699999992  | -4.963300228  | -0.01909999922  | -10.01910919  | -0.01250000019 | -15.01249991  |
| 0.6749515533 | -0.1462638080  | -0.2464940846  | 0.1002302691   | -0.2469702363  | -5.246970177  | 0.01649999991   | -9.983499527  | -0.01600000076 | -15.01599997  |
| 0.7056311369 | -0.5291973352  | -0.3918191466  | -0.137581737   | -0.397331715   | -4.966199875  | 0.03279999846   | -9.966199875  | -0.0283000295  | -15.02830295  |
| 0.7363107800 | -0.6719164848  | -0.3420999384  | -0.3298170865  | -0.3279514015  | -5.327951431  | 0.02520000003   | -9.974800110  | -0.03929999843 | -15.03929996  |
| 0.7669903636 | -0.5002077818  | -0.1061893627  | -0.3940184116  | -0.06469999999 | -5.064700127  | -0.00289999963  | -10.00289996  | -0.03849999979 | -15.03849983  |
| 0.7976700068 | -0.08290000260 | 0.2094719112   | -0.2922388779  | 0.2627388779   | -4.737264156  | -0.032900000185 | -10.03289986  | -0.02040000005 | -15.02040005  |
| 0.8283496499 | 0.3970367312   | 0.4522307217   | -0.05519999936 | 0.485439031    | -4.514564037  | -0.0454999908   | -10.04549980  | 0.01229999954  | -14.98770046  |
| 0.8590292335 | 0.7259796246   | 0.5907996246   | 0.2205791926   | 0.4825078033   | -4.517492394  | -0.03020000008  | -10.03020000  | 0.04850000143  | -14.95149990  |
| 0.8897088766 | 0.7461432219   | 0.3297846019   | 0.4163564697   | 0.2471920252   | -4.752808094  | 0.008659999818  | -9.991339684  | 0.07389999926  | -14.92609978  |
| 0.9203884602 | 0.4437189102   | 0.02690000087  | 0.4168454111   | -0.1049427465  | -5.104942799  | 0.05330000073   | -9.946700096  | 0.07850000262  | -14.92150021  |
| 0.9510681033 | -0.06539999694 | -0.2485601008  | 0.1831531823   | -0.3923786283  | -5.392378807  | 0.08179999888   | -9.918199959  | 0.06199999899  | -14.93799973  |
| 0.9817476869 | -0.5800970197  | -0.3466658952  | -0.2334311604  | -0.4619288637  | -5.461928844  | 0.07999999821   | -9.920000076  | 0.03530000150  | -14.96469975  |
| 1.012427330  | -0.9058232307  | -0.2077051550  | -0.6981180310  | -0.2729453146  | -5.272945404  | 0.04960000142   | -9.950400352  | 0.01559999958  | -14.98439980  |
| 1.0431016914 | -0.9852943252  | -0.1003381175  | -1.0303381175  | -0.0737006033  | -4.991470337  | 0.018100000226  | -9.991470337  | 0.00853000023  | -14.99147033  |
| 1.073786616  | -0.6892283559  | 0.4095247686   | -1.098753214   | 0.3804177344   | -4.619852176  | -0.01000000092  | -10.01009978  | 0.04720000178  | -14.95279980  |
| 1.104466200  | -0.2836221755  | 0.5347441435   | -0.8183662891  | 0.4523336887   | -4.547666550  | -0.01109999977  | -10.01109982  | 0.09350000322  | -14.90649986  |
| 1.135145783  | 0.1273436248   | 0.3716952503   | -0.2443516254  | 0.2022407204   | -4.797759056  | 0.03200000152   | -9.968000412  | 0.1374845803   | -14.86251545  |
| 1.165825367  | 0.4288640856   | -0.04600000181 | 0.4694472253   | -0.2941464782  | -5.294146538  | 0.094400000355  | -9.905999594  | 0.1591974795   | -14.84080219  |
| 1.196504951  | 0.5851897597   | -0.5286505818  | 1.113840342    | -0.8256874084  | -5.825687408  | 0.1478583515    | -9.85241380   | 0.1491784751   | -14.85082150  |
| 1.227184653  | -0.628127567   | -0.868559227   | -1.485172739   | -1.148191452   | -6.148191452  | 0.1675256300    | -9.832747459  | 0.1142789813   | -14.88562107  |
| 1.257864237  | 0.6067988873   | -0.8943050504  | 1.501103997    | -1.113961339   | -6.113961220  | 0.1440252066    | -9.855975151  | 0.07559999824  | -14.92440033  |
| 1.288543940  | 0.5238781341   | -0.6135406494  | 1.136927843    | -0.7624520063  | -5.762452126  | 0.09189999849   | -9.908100128  | 0.05710000172  | -14.94289970  |
| 1.31922523   | 0.3126375079   | -0.2071240842  | 0.5197610627   | -0.3200409710  | -5.320040971  | 0.04500000000   | -9.900000000  | 0.07240000363  | -14.92759991  |
| 1.349903107  | -0.1280972064  | 0.03759999946  | -0.1656513065  | -0.09870000184 | -5.098700047  | 0.02030000091   | -9.979700039  | 0.1159438193   | -14.88405609  |
| 1.380582690  | -0.8570804293  | -0.1264016235  | -0.7314571625  | -0.1372116109  | -5.1372116109 | 0.04500000000   | -9.900000000  | 0.0934166100   | -14.93741661  |
| 1.411262274  | -1.799060345   | -0.7523672581  | -1.046630807   | -1.036734700   | -6.036734581  | 0.1047506109    | -9.895249367  | 0.1796168238   | -14.82038307  |
| 1.441941857  | -2.702727318   | -1.630714059   | -1.072013259   | -1.939180851   | -6.939180851  | 0.1648227721    | -9.835177422  | 0.1436440051   | -14.85635567  |
| 1.472621560  | -3.185004711   | -2.326409340   | -0.8589593712  | -2.567719221   | -7.567719460  | 0.1865292341    | -9.813470880  | 0.05480000004  | -14.94519997  |
| 1.503301144  | -2.863555670   | -2.347006321   | -0.5165492892  | -2.432138920   | -7.432138920  | 0.1453387141    | -9.854660948  | -0.06019999832 | -15.06019974  |
| 1.533998046  | -1.533147454   | -1.365131021   | -0.1660164337  | -1.252178073   | -6.252178192  | 0.04589999840   | -9.954099655  | -0.1588463485  | -15.15884950  |
| 1.564660430  | 0.629287965    | 0.590721387    | 0.0954999982   | 0.875973619    | -4.875973619  | -0.07800000161  | -10.07800000  | -0.03070000000 | -15.03070000  |
| 1.595340014  | 3.328458309    | 3.092223644    | 0.2362346649   | 3.454484224    | -1.545515776  | -0.1791279465   | -10.17912796  | -0.1831326932  | -15.18313310  |
| 1.626019597  | 5.651795864    | 5.382479191    | 0.2693164349   | 5.724976540    | 0.7249765396  | -0.2223444730   | -10.22234440  | -0.1201525703  | -15.12015247  |
| 1.656699300  | 6.901684761    | 6.659991741    | 0.2416930497   | 6.930298328    | 1.930298328   | -0.2057856470   | -10.20578575  | -0.06449999660 | -15.06449986  |
| 1.687378883  | 6.565288067    | 6.360918522    | 0.2043700069   | 6.596999168    | 1.596999168   | -0.1670724452   | -10.16707230  | -0.06899999827 | -15.06900024  |
| 1.718058467  | 4.585313320    | 4.39545837     | 0.1898576617   | 4.724998951    | -0.2750010490 | -0.1681043506   | -10.16810417  | -0.1614389271  | -15.16143894  |
| 1.748738050  | 1.418586892    | 1.215321064    | 0.2032473534   | 1.805324674    | -3.194675446  | -0.263476565    | -10.26347542  | -0.2265278935  | -15.22652762  |
| 1.779417753  | -2.091541767   | -2.319225311   | 0.2276837230   | -1.344682336   | -6.344682217  | -0.4662701190   | -10.46627045  | -0.5082729459  | -15.50827312  |
| 1.810097337  | -4.989090919   | -5.227771759   | 0.2386808544   | -3.865590572   | -8.865590572  | -0.7282565832   | -10.72825623  | -0.6339246631  | -15.63392448  |
| 1.840776920  | -6.525922775   | -6.744849205   | -0.289262956   | -5.148827076   | -10.14882600  | -0.9467523694   | -10.94675255  | -0.6926999981  | -15.69269981  |
| 1.871456623  | -6.406494617   | -6.573106766   | 0.1666122526   | -5.02617338    | -10.02612686  | -0.9992209673   | -10.99922085  | -0.5477589965  | -15.54775906  |
| 1.902136207  | -4.864096642   | -4.958698259   | 0.0945999949   | -3.78768126    | -8.78768126   | -0.9376618709   | -10.93766179  | -0.3771519661  | -15.37715149  |
| 1.932815790  | -2.542462111   | -2.564843416   | 0.0223999920   | -2.032624245   | -7.032624245  | -0.3150013685   | -10.31500149  | -0.2172176689  | -15.21721745  |
| 1.963495374  | -0.234670826   | -0.2006819844  | -0.0340000185  | -0.4196144938  | -5.419614315  | 0.3554259539    | -9.644574165  | -0.1364934593  | -15.13649368  |
| 1.994174957  | 1.413007259    | 1.482098460    | -0.0690999996  | 0.5752683282   | -4.424731731  | 1.055161834     | -8.944838524  | -0.1483316272  | -15.14833161  |
| 2.024854660  | 2.114417315    | 2.203627110    | -0.08919999748 | 0.8023921251   | -4.197607994  | 1.591112375     | -8.408887863  | -0.1898775250  | -15.18987751  |
| 2.055534363  | 1.994933367    | 2.102596045    | -0.1076626331  | 0.4866700947   | -4.563239697  | 1.805367231     | -8.194632530  | -0.1394412071  | -15.13944120  |
| 2.086213827  | 1.472385049    | 1.609552145    | -0.1371672581  | -0.1517448129  | -5.151744813  | 1.631890059     | -8.36810970   | 0.1294900000   | -14.87059907  |
| 2.11689350   | 1.030126452    | 1.213148117    | -0.1830215454  | -0.5857830243  | -5.585783024  | 1.121534109     | -8.784656562  | 0.6773971915   | -14.32260323  |
| 2.147572994  | 0.9864706397   | 1.226559281    | -0.2400887012  | -0.6436012803  | -5.643601161  | 0.4251108766    | -9.574889183  | 1.444509745    | -13.55549049  |
| 2.178252697  | 1.359963179    | 1.654605627    |                |                |               |                 |               |                |               |

|              |                |                 |                 |                 |               |                 |               |                 |              |
|--------------|----------------|-----------------|-----------------|-----------------|---------------|-----------------|---------------|-----------------|--------------|
| 2.791845083  | -0.4904618859  | -0.08959999681  | -0.4008704126   | 0.2751134038    | -4.724886417  | -0.06830000132  | -0.06830025   | -0.2964032590   | -15.29640293 |
| 2.822325458  | -0.6282350530  | -0.0499999970   | -0.783224458    | 0.1947275130    | -4.095522442  | -0.1202000000   | -0.1202000000 | -0.1202000000   | -15.12020000 |
| 2.852302450  | -0.7528458238  | 0.1234769276    | -0.783227463    | 0.00518999938   | -4.994810104  | 0.05189999938   | -9.948100090  | 0.06639999986   | -14.93360403 |
| 2.883883953  | -0.7184126973  | 0.07220000029   | -0.7905752063   | -0.1999279261   | -5.199927807  | 0.1110737026    | -9.888926506  | 0.1610167325    | -14.83898354 |
| 2.914563417  | -0.5938226581  | -0.05909999833  | -0.5347584486   | -0.3255426586   | -5.325542450  | 0.1317219138    | -9.868278503  | 0.1347565204    | -14.86524391 |
| 2.945243120  | -0.4010872245  | -0.1836711615   | -0.2174160480   | -0.3212515712   | -5.321251392  | 0.1074199602    | -9.892580032  | 0.03020000085   | -14.96980000 |
| 2.975922585  | -0.1864630729  | -0.2232303470   | 0.03680000082   | -0.2035455257   | -5.203545570  | 0.05359999835   | -9.946399889  | -0.07329999985  | -15.07330036 |
| 3.006602287  | -0.01679999940 | -0.150528505    | 0.1337773055    | -0.04209999943  | -5.042099980  | -0.01460000000  | -10.014600000 | -0.1059461087   | -15.10594610 |
| 3.037281990  | 0.04479999840  | -0.000806000255 | 0.04560000077   | 0.07389999926   | 4.926099777   | -0.03139999881  | -10.03139973  | -0.04329999909  | -15.04329967 |
| 3.067961693  | -0.02940000035 | 0.1508232429    | -0.1802208275   | 0.09000000358   | -4.909999847  | -0.02429999970  | -10.02429962  | 0.08510000259   | -14.91489983 |
| 3.098641157  | -0.2102684826  | 0.2306556851    | -0.4409241378   | 0.003180000000  | -4.996819973  | 0.01250000019   | -9.987500191  | 0.2150136530    | -14.78498650 |
| 3.129320860  | -0.4166432917  | 0.2035655528    | -0.6202088594   | -0.1355794668   | -5.135579586  | 0.05719999969   | -9.942799568  | 0.2819276750    | -14.71807194 |
| 3.1600000324 | -0.5467497110  | 0.08760000020   | -0.6346598502   | -0.2510929108   | -5.251092911  | 0.08590001223   | -9.914099693  | 0.2528099418    | -14.74719048 |
| 3.1906900027 | -0.5232000947  | -0.05920000002  | -0.4640388191   | -0.2832801044   | -5.283279896  | 0.08389999717   | -9.916099548  | 0.1401180622    | -14.85981941 |
| 3.221359730  | -0.3007000730  | -0.1707229167   | -0.1592861563   | -0.2165461332   | -5.216546059  | 0.05279999971   | -9.947199821  | -0.006949999835 | -15.00695038 |
| 3.252039194  | -0.02309999987 | -0.2058464438   | 0.1827532947    | -0.08519999683  | -5.085199933  | 0.008070000447  | -9.991930008  | -0.1287368536   | -15.12873650 |
| 3.282718897  | 0.2917472720   | -0.1654018760   | 0.4571941880    | 0.04659999907   | -4.953400135  | -0.02910000086  | -10.02910042  | -0.1829215139   | -15.18292141 |
| 3.313998600  | 0.5036255121   | -0.09680000156  | 0.5903835297    | 0.1183855012    | -4.881614685  | -0.04280000180  | -10.04279995  | -0.1622994840   | -15.16229916 |
| 3.344078064  | -0.5434644618  | -0.02030000091  | 0.5637864140    | 0.1037246883    | -4.896275520  | -0.03020000085  | -10.03020000  | -0.09380000085  | -15.09379959 |
| 3.374757767  | -0.4115809798  | -0.00182999965  | 0.4134066105    | 0.00129999921   | -4.978700161  | -0.00159999960  | -10.00160027  | -0.02150000073  | -15.02149963 |
| 3.405437231  | 0.1741662025   | -0.03489999846  | 0.2091057450    | -0.07710000128  | -5.077099800  | 0.02549999952   | -9.974499702  | 0.01669999957   | -14.98330021 |
| 3.436116934  | -0.06819999963 | -0.09239999950  | 0.02419999987   | -0.1344979554   | -5.134498119  | 0.03559999913   | -9.964400291  | 0.006529999897  | -14.99347019 |
| 3.466796637  | -0.2242331356  | -0.1345287774   | -0.0980000222   | -0.1179317012   | -5.117931843  | 0.02280000038   | -9.977199554  | -0.03830000013  | -15.03829956 |
| 3.497476101  | -0.2472067939  | -0.1735100708   | -0.1197867231   | -0.03900000015  | -5.039389984  | -0.00662000117  | -10.00662001  | -0.08699999750  | -15.08699999 |
| 3.528155804  | -0.1480578631  | -0.07079999994  | -0.07729999721  | 0.07600000265   | -4.076020130  | -0.03819999844  | -10.03820033  | -0.091920618    | -15.10932017 |
| 3.558835506  | 0.01889999956  | 0.01219999976   | 0.006730000023  | 0.161453365     | -4.838546753  | -0.05700000003  | -10.05700016  | -0.09220000356  | -15.09220028 |
| 3.589514971  | 0.1845806986   | 0.08219999820   | 0.1023827419    | 0.1823627502    | -4.817637444  | -0.05530000106  | -10.05529976  | -0.04490000010  | -15.04499994 |
| 3.620194674  | 0.2955147474   | 0.1065736413    | 0.1889438894    | 0.1351457834    | -4.864854336  | -0.03559999913  | -10.03559993  | 0.007079999884  | -14.99291992 |
| 3.650874376  | 0.3306775093   | 0.07609999925   | 0.2547546565    | 0.04919999938   | -4.950799942  | -0.009429999627 | -10.00942993  | 0.03629999980   | -14.96370029 |
| 3.681553841  | 0.2987884452   | 0.02973999912   | 0.230467305     | -0.02973999912  | -4.862390548  | 0.00365999981   | -9.990340233  | 0.02859999981   | -14.97140028 |
| 3.712233543  | 0.2282934934   | -0.05739999935  | 0.2856566611    | -0.05939999968  | -5.059400082  | -0.01250000019  | -9.987500191  | -0.01049999986  | -15.01049995 |
| 3.742913008  | 0.1398499757   | -0.08910000324  | 0.228988101     | -0.02950000018  | -5.029500008  | -0.00104999963  | -10.00105000  | -0.05860000104  | -15.05860043 |
| 3.773592710  | 0.04670000076  | -0.06970000267  | 0.1164097413    | 0.04210000113   | -4.957900047  | -0.02280000038  | -10.02280045  | -0.08910000324  | -15.08909988 |
| 3.804272413  | -0.04820000008 | -0.00899999613  | -0.03920000046  | 0.1159490496    | -4.884050846  | -0.04050000012  | -10.04049969  | -0.08439999819  | -15.08440018 |
| 3.834952116  | -0.1414237171  | 0.06300000101   | -0.2044283450   | 0.1528496444    | -4.847150326  | -0.04470000044  | -10.04469967  | -0.04509999976  | -15.04510021 |
| 3.865631580  | 0.2199991494   | 0.1120876007    | -0.320047305    | 0.1337602437    | -4.862390548  | -0.03239999982  | -9.990340233  | 0.01239000044   | -14.98869991 |
| 3.896311283  | -0.2616739571  | -0.1170256063   | -0.378695709    | 0.06830000132   | -4.931700230  | -0.01099999994  | -10.01099968  | 0.05970000103   | -14.94029999 |
| 3.926990747  | -0.2450190037  | 0.07940000296   | -0.3244214952   | -0.01130000036  | -5.011300087  | 0.01070000045   | -9.989299774  | 0.07999999821   | -14.92000008 |
| 3.957670450  | -0.1643692255  | 0.02150000073   | -0.1858760267   | -0.06759999692  | -5.067599773  | 0.02250000089   | -9.977499962  | 0.06660000235   | -14.93340015 |
| 3.988349915  | -0.03970000148 | -0.02600000054  | -0.013700000001 | -0.07689999789  | -5.076800000  | 0.02019999921   | -9.979800224  | 0.03060000017   | -14.96940041 |
| 4.019029617  | 0.08640000224  | -0.03999999911  | 0.1263813972    | -0.04019999877  | -5.040200233  | 0.007029999979  | -9.992970467  | -0.00686000081  | -15.00685978 |
| 4.049709320  | -0.1650111526  | -0.01600000076  | 0.1809875518    | 0.01840000041   | -4.981598088  | -0.00858000019  | -10.008580021 | -0.02569999918  | -15.02569962 |
| 4.080389023  | 0.1640671194   | 0.03070000000   | 0.1333454251    | 0.06499999762   | -4.934999943  | -0.01740000024  | -10.01739979  | -0.01689999923  | -15.01690006 |
| 4.111068726  | 0.08519999683  | 0.07379999757   | 0.01140000019   | 0.07389999926   | -4.926099777  | -0.01420000009  | -10.01420021  | 0.01410000026   | -14.98599993 |
| 4.141747952  | -0.03489999846 | 0.08980000000   | -0.1247438490   | 0.03959999979   | -4.900400105  | 0.0026500000097 | -10.0026512   | 0.05050000176   | -14.94950008 |
| 4.172427654  | -0.1407665461  | 0.07010000199   | -0.2108726948   | -0.02119999938  | -5.021200180  | 0.01769999973   | -9.982299805  | 0.07360000163   | -14.92640018 |
| 4.203107357  | -0.154303330   | -0.01730000000  | -0.2004349425   | -0.07193999979  | -5.071939979  | 0.03100999979   | -9.960990742  | -0.01297000018  | -14.92700000 |
| 4.233787060  | -0.1543831229  | -0.02580000088  | -0.1285661012   | -0.1076506255   | -5.107650575  | 0.03390000015   | -9.966099739  | 0.04800000042   | -14.95199966 |
| 4.264467663  | -0.07320000231 | -0.05689999834  | -0.01630000025  | -0.09570000321  | -5.095699787  | 0.02549999952   | -9.974499702  | 0.01329999976   | -14.98670006 |
| 4.295145988  | 0.005849999841 | -0.05689999834  | 0.06270000039   | -0.05279999971  | -5.0528000179 | 0.01080000028   | -9.989199638  | -0.01480000000  | -15.01480007 |
| 4.325825691  | 0.03269999847  | -0.02940000035  | 0.06210000068   | -0.002769999905 | -5.002769947  | -0.00251000020  | -10.00251007  | -0.02410000004  | -15.02410030 |
| 4.356505394  | -0.01140000019 | 0.008440000005  | -0.01989999972  | 0.02889999934   | -4.971099854  | -0.008030000143 | -10.00802994  | -0.01240000036  | -15.01239967 |
| 4.387185097  | -0.1003953367  | 0.05590999913   | -0.1359762996   | 0.02739999911   | -5.027399971  | -0.00740000073  | -9.99470431   | -0.01440000073  | -14.98599998 |
| 4.417864799  | -0.173360458   | 0.03700000081   | -0.2112983614   | -0.002779999899 | -5.002780235  | 0.00725999986   | -9.992793677  | 0.03299999982   | -14.96700001 |
| 4.448544502  | -0.1660014540  | 0.01489999983   | -0.180904247    | -0.04340000078  | -5.043399811  | 0.01860000007   | -9.981399536  | 0.03970000148   | -14.96030045 |
| 4.479223728  | -0.04720000178 | -0.02109999955  | -0.02600000054  | -0.07240000367  | -5.072400093  | 0.02390000038   | -9.976099968  | 0.02740000002   | -14.97259998 |
| 4.509903431  | 0.1578210282   | -0.05180000141  | 0.2096512169    | -0.07360000163  | -5.073599815  | 0.02030000001   | -9.979700089  | 0.001429999994  | -14.99857044 |
| 4.540583124  | 0.3711039126   | -0.06210999982  | 0.4335011052    | -0.04589999840  | -5.045899868  | 0.00942000017   | -9.990579605  | -0.02600000054  | -15.02600002 |
| 4.571262836  | 0.4939934015   | -0.04890000075  | 0.542904434     | -0.00271999989  | -5.002719879  | -0.00365000006  | -10.003649971 | -0.04250000045  | -15.04250094 |
| 4.601942539  | 0.4532098174   | -0.01960000023  | 0.472827258     | 0.03530000150   | -4.964700222  | -0.01290000044  | -10.01290035  | -0.04210000113  | -15.04209995 |
| 4.632621765  | 0.2397279441   | 0.00979999624   | 0.2297527045    | 0.05150000006   | -4.948500156  | -0.01460000034  | -10.01460000  | -0.02690000087  | -15.02690029 |
| 4.663301468  | -0.07949999720 | 0.02520000003   | -0.1047075465   | 0.04069999978   | -4.959300041  | -0.00899000002  | -10.00890029  | 0.006529999897  | -15.00652991 |
| 4.693981171  | -0.3846803606  | 0.01700000006   | -0.4043543935   | 0.01599999985   | -4.988399982  | 5.569999848e-05 | -9.999944687  | 0.008000000380  | -14.99199963 |
| 4.724660873  | -0.5528782010  | -0.00221999908  | -0.5505582865   | -0.01889999956  | -5.018899918  | 0.00720000029   | -9.99279732   | 0.009479999542  | -14.99052048 |
| 4.75340576   | -0.5121261477  | -0.02800000086  | -0.4840933681   | -0.03444999914  | -5.034500122  | 0.00848999920   | -9.991510391  | -0.001979999943 | -15.00197983 |
| 4.786020279  | -0.2755111558  | -0.04399999976  | -0.2314681560   | -0.02759999968  | -5.027599812  | 0.003079999937  | -9.996919632  | -0.01950000040  | -15.01949978 |
| 4.816699505  | 0.06150000170  | -0.04219999909  | 0.1037291214    | -0.002510000020 | -5.002510071  | -0.00631000084  | -10.00631046  | -0.03339999914  | -15.03339958 |
| 4.847379208  | 0.3606030941   | -0.02380000055  | 0.3843661249    | 0.02749999985   | -4.972499847  | -0.01510000043  | -10.01509953  | -0.03620000184  | -15.03619957 |
| 4.878058910  | 0.4995728731   | 0.00193000028   | 0.4976475239    | 0.04760000110   | -4.952400208  | -0.01909999922  | -10.01910019  | -0.02649999969  | -15.02649975 |
| 4.908738613  | 0.4253102839   | 0.02600000032   | 0.4028655528    | 0.04870000109   | -4.951300144  | -0.01479999940  | -10.01479993  | -0.00932000017  | -15.00932026 |
| 4.939418316  | 0.1763332321   | 0.00950000018   | 0.1468628943    | 0.03209999949   | -4.967899799  | -0.009619999677 | -10.00961971  | 0.006969999988  | -14.99302959 |
| 4            |                |                 |                 |                 |               |                 |               |                 |              |

5.614369869 -0.2000558972 -0.0126999985 -0.1873936802 -0.00918000052 -5.009180069 0.002439999953 -9.997559547 -0.005919999909 -15.00592041  
5.6440490395 -0.0032399983 -0.0055999986 -0.00121000117 -4.998789737 -0.006159999963 -15.00515978  
5.675728798 0.0157999984 0.00405000105 0.00975999812 0.00669000184 -9.993309975 -0.00101000007 -10.00100994 -0.00162999955 -15.00162983  
5.706408501 0.1401468068 0.0104999986 0.1296512783 0.00552000122 -4.994480133 0.0002969999914 -9.999703407 0.004679999780 -14.99532032  
5.737088203 0.2010409683 0.0111999960 0.1898821905 -0.000459000026 -5.000459194 0.002610000083 -9.997389793 0.009060000069 -14.990490049  
5.767767906 0.1703822762 0.006329999771 0.1640558243 -0.007129999809 -5.007130146 0.004439999815 -9.995559692 0.009019999765 -14.99098015  
5.798447609 0.06089999899 -0.00138999899 -0.00230000034 -0.0104999986 -5.010499954 0.004650000117 -9.995349884 0.004430000205 -14.99557018  
5.823124825 -0.0834999985 -0.00808000258 -0.0754000230 -0.00856999898 -5.008570194 0.002510000020 -15.00251007  
5.859806538 -0.2069874853 -0.0108000028 -0.1962266862 -0.00236000042 -5.002359867 0.0001999999949 -9.999799728 -0.008600000292 -15.00860023  
5.890486240 -0.2632831931 -0.00865000207 -0.2546375692 0.00509000108 -4.994909763 -0.00251000020 -10.00251007 -0.01119999960 -15.01119995  
5.921165943 -0.2315705270 -0.00328000063 -0.2282869667 0.01040000003 -4.989600182 -0.00402999953 -10.00403023 -0.009630000219 -15.00963020  
5.951845646 -0.1220562309 0.00242000033 -0.1244748384 0.01150000002 -4.988500118 -0.00392000046 -10.00391960 -0.005169999786 -15.00516987  
5.982524872 0.0295000018 0.005710000172 0.02380000055 0.008700000122 -4.991300106 -0.002570000011 -10.00257015 -0.0004819999891 -15.000481866  
6.013204575 0.1750139447 0.00528999768 0.1697226316 0.00404000029 -4.995960236 -0.000896000275 -10.000896826 0.002150000073 -14.99785042  
6.043884277 0.2694286108 0.00173000018 0.2677029073 0.000180000027 -4.999820232 0.0001279999997 -9.999872208 0.001419999986 -14.99879978  
6.074563980 0.2842954397 -0.00300000026 0.2872942686 -0.001040000003 -5.001039982 1.470000007e-05 -9.999898595 -0.001979999943 -15.00197983  
6.105243683 0.2153029591 -0.00657999812 0.2218784839 0.0006009999779 -4.999399185 -0.00107999958 -10.00107956 -0.006099999882 -15.00609970  
6.135923386 0.08290000260 -0.00748000146 0.09040000290 0.00380000064 -4.996200085 -0.00248000025 -10.00247955 -0.00879999952 -15.00879955  
6.166602612 -0.07360000163 -0.00599999800 -0.0680000370 0.00662000117 -4.993200070 -0.00304999988 -10.00304134 -0.008099999563 -15.00801004  
6.197282314 -0.2076720744 -0.00210000001 -0.2055648267 0.00755000213 -4.992450237 -0.00340000045 -10.00339985 -0.006250000093 -15.00625038  
6.227962017 -0.2784732282 0.00118999981 -0.2796602547 0.00615999978 -4.993840218 -0.00248000025 -10.00247955 -0.00249000101 -15.00249004  
6.258641720 -0.2637684345 0.00273000066 -0.2664995193 0.003160000080 -4.996840000 -0.00112000030 -10.00111961 0.0006910000229 -14.99930859  
6.283201423 -0.1674295664 0.00188999956 -0.1693180305 -0.0001809999958 -5.000181198 4.450000051e-05 -9.99995177 0.002030000091 -14.99796963  
6.309000648 -0.01950000040 -0.0007850000270 -0.01860000007 -0.00276000061 -5.002759933 0.000575000128 -9.999424934 0.001309999963 -14.99869865  
6.325600351 -0.1223205904 -0.00430000146 0.1366239044 -0.004079998 -5.004079819 0.000198000026 -10.000198999999 -15.00019798  
6.381360054 0.2379100472 -0.00694000225 0.2448557111 -0.004370000213 -5.004370213 -0.0001929999999 -10.00019264 -0.002379999962 -15.00238037  
6.412039757 0.2617229521 -0.00777000026 0.2694897652 -0.00416000011 -5.004159927 -0.000743000114 -10.00074291 -0.002859999891 -15.00286007  
6.442719460 0.1958668232 -0.00651999821 0.2023916095 -0.003930000123 -5.003930092 -0.0008880000096 -10.000888787 -0.00170999982 -15.00170994  
6.473399865 0.06369999796 -0.00377000068 0.06740000099 -0.00380000064 -5.003799915 -0.000529000117 -10.00052929 0.0005610000226 -14.99943924  
6.504079389 -0.08200000291 -0.00549999948 -0.08766000029 -0.00362000020 -5.003620148 0.0001339999999 -9.99964658 0.002899999963 -14.99798988  
6.534758091 -0.2063514739 0.001979999943 -0.2083300650 -0.003199999919 -5.003200054 0.0008459999808 -9.999154091 0.00433999985 -14.99565983  
6.565437794 -0.2505144179 0.00312000008 -0.2536343038 -0.00257000011 -5.002570152 0.001270000008 -9.998729706 0.004420000128 -14.99557972  
6.596117496 -0.2081229687 0.00274999985 -0.2108695358 -0.001979999943 -5.001979828 0.001339999959 -9.998660088 0.003389999969 -14.99660969  
6.626797199 -0.0982000082 0.00136999954 -0.0996000217 -0.00173999978 -5.001739979 0.001139999949 -9.998860359 0.001970000009 -14.99802971  
6.657474625 0.03689999878 -9.390000196e-05 0.03700000048 -0.00190000032 -5.001900196 0.0008619999862 -9.999137878 0.0009449999779 -14.99905491  
6.689155128 0.03780000000 0.000130000190 0.1501290333 -0.00213999999 -5.002140045 0.000729999983 -9.999321964 0.0001370000000 -14.99922181  
6.718835831 0.2039816878 -4.379999828e-05 0.2040254623 -0.00190000032 -5.001900196 0.000584000023 -9.999416351 0.001279999968 -14.99872017  
6.749515533 0.1907340586 0.001919999951 0.1888142675 -0.000729000212 -5.000729084 0.0005530000199 -9.999446869 0.002099999925 -14.99790001  
6.780195236 0.1258290410 0.004449999891 0.1213803589 0.001350000035 -4.998650074 0.0004630000003 -9.999537468 0.002640000079 -14.99736023  
6.810874462 0.04160000011 0.006500000134 0.035100000184 0.003700000001 -4.996300220 0.0002589999931 0.002550000092 -14.99744987  
6.841559455 -0.02920000069 0.00714999961 -0.02640000150 0.00519999997 -4.994679928 -1.390000034e-05 -10.00001433 0.001850000001 -14.99814987  
6.872233868 -0.07820000031 0.059799997 -0.073799997 -0.00526999912 -4.994629860 -0.00024500028 -10.00024509 0.008479999960 -14.99915218  
6.902913570 -0.07500000298 0.00332999978 -0.07840000093 0.003700000001 -4.996300220 -0.000334000112 -10.00033379 -3.460000153e-05 -15.00003433  
6.933593273 -0.06689999998 0.0002119999990 -0.06710000336 0.0009909999790 -4.999001932 -0.000265000097 -10.00026512 -0.0005140000139 -15.00051403  
6.964272976 -0.06310000271 -0.002120000007 -0.06100000069 -0.00144999982 -5.001450062 -0.0001209999973 0.0001000000000 -15.00054932  
6.994952202 -0.03789999926 -0.00219999989 -0.03719999826 -0.00236000042 -5.002359867 -3.550000106e-05 -10.00003529 -0.0003199999919 -15.00032043  
7.025631905 -0.00330000022 -0.00230000036 -0.00230000036 -0.001199999991 -5.001199016 -9.789999992e-05 -10.00000000 -15.00000074  
7.056311607 -0.1030326709 0.001240000012 -0.1042719483 0.001560000004 -4.998439789 -0.0002819999936 -10.00028229 -4.120000085e-05 -15.00004011  
7.086991310 -0.08129999787 0.00387999975 -0.0851000259 0.004550000187 -4.995450020 -0.000460999988 -10.00046062 -0.0002130000066 -15.00021267  
7.117671013 -0.01860000007 0.005270000882 -0.02390000038 0.006229999941 -4.993770123 -0.0004670000053 -10.00046730 -0.0004970000009 -15.00049686  
7.148350716 0.07419999689 0.004730000161 0.06949999828 0.005679999944 -4.994319916 -0.0002059999970 -10.00020599 -0.0007399999886 -15.00074005  
7.179029942 0.1672045887 0.002480000225 0.164729046 0.00349999941 -4.99695150 0.0002680000034 -9.999732018 -0.0008360000211 -15.00083637  
7.209709644 -0.2281958161 -0.00469999923 0.2226922442 -0.00437999982 -5.004379982 0.0005900000000 -9.999240875 -0.0005900000000 -15.00059075  
7.240389347 -0.2127968967 -0.00273000066 0.2155316919 -0.003160000080 -5.003160000 0.001030000043 -9.998970032 -0.0006000000285 -15.00059986  
7.271069050 0.1327175945 -0.00340000045 0.1361172646 -0.00392000046 -5.003920078 0.0009130000253 -9.999087334 -0.0003950000100 -15.00039482  
7.301748753 0.006730000223 -0.002039999894 0.009039999917 -0.00255999935 -5.002560139 0.0004450000124 -9.999554634 -0.0001979999943 -15.00019836  
7.332427979 -0.1204377636 -0.0002360000071 -0.1202021316 -4.289999924e-05 -5.000042915 -0.0001699999993 -10.00016975 -2.259999928e-05 -15.00002829  
7.363107681 -0.2013589442 0.001550000045 -0.2029092610 0.002069999930 -4.997930050 -0.0006380000268 -10.00063801 0.0001189999966 -14.99988079  
7.393787384 -0.2059223354 0.001930000028 -0.2078569531 0.002490000101 -4.997509956 -0.000729000212 -10.00072961 0.0001780000021 -14.99982166  
7.424467087 -0.1346371770 0.000557999997 -0.1351946741 0.0008789999993 -4.999121189 -0.000403000127 -10.00040340 8.140000136e-05 -14.99991894  
7.455146790 -0.01899999939 -0.001979999943 -0.01700000092 -0.01930000028 -5.001930237 0.0001690000063 -9.999831200 -0.0002169999934 -15.00021744  
7.485826015 0.09149999976 -0.00439999976 0.09589999914 -0.004410000052 -5.004409790 0.0006869999925 -9.999313354 -0.0006869999718 -15.00068683  
7.516505718 0.1503097862 -0.005410000216 0.1557178795 -0.00517999962 -5.005179982 0.0008789999993 -9.999120712 -0.001099999994 -15.00109959  
7.547185421 0.1329271603 -0.00438999900 0.1376290789 -0.00375999992 -5.003759661 0.0006409999914 -9.999359131 -0.0001270000008 -15.00127029  
7.577865124 0.04879999906 -0.001769999973 0.05050000176 -0.000829999715 -5.00083102 9.169999976e-05 -0.999908447 -0.0009810000192 -15.00098133  
7.608548827 -0.0666999659 0.001180000021 -0.06780000031 0.001870000036 -4.998129845 -0.0004930000287 -10.00049305 -0.0001970000012 -15.00019741  
7.639224529 -0.1640410870 0.002920000115 -0.1696577062 0.002889999887 -4.997109890 -0.0008290000260 -10.00082874 0.0008559999987 -14.99914360  
7.669903755 -0.2028587162 0.00243999953 -0.2053001970 0.00144999982 -4.998549938 -0.0007730000070 -10.00077343 0.001760000014 -14.99824047  
7.700583458 -0.1674505174 -0.0001900000081 -0.1672602892 -0.001879999996 -5.001880169 -0.0000391999972 -10.000039196 0.002080000006 -14.99792004  
7.731263161 -0.07320000098 -0.003830000146 -0.0684999726 -0.00548999894 -5.005489826 7.840000035e-05 -9.99929799 0.001569999964 -14.9984029  
7.761942863 0.00560000077 -0.00079999938 0.05229999870 -0.00745999993 -5.007460117 0.0003699999943 -9.999629974 0.0003150000121 -14.99966529  
7.792622566 0.1438001004 -0.00755999824 0.1506377757 -0.006620000117 -5.006619930 0.0003300000036 -9.99967168 -0.001270000008 -15.00127029  
7.823301792 0.1890305132 -0.00565999792 0.1946940273 -0.003100000089 -5.003099918 1.639999937e-05 -9.999883788 -0.002580000088 -15.00257969  
7.853981495 0.1753404946 -0.0001799999690 0.1771400273 0.00167999987 -4.998320103 -0.0003610000131 -10.00036144 -0.003109999932 -15.00310993  
7.884661198 0.06466000105 0.01152510718 0.00569999999 -4.994399998 -10.005699998 -4.994399998 -10.005699998 -10.005699998 -15.005699998  
7.915340900 0.0460000009 0.00536999912 0.0460000181 0.007230000105 4.992770195 -0.0003779999970 -10.00037766 -0.001479999977 -15.00148010  
7.946026063 -0.01020000037 0.00585999917 -0.01610000059 0.005830000155 -4.994170189 6.849999772e-05 -9.999931335 -3.930000094e-05 -15.00003910  
7.976700306 -0.03460000083 0.003900000114 -0.03860000148 0.00234999966 -4.997650146 0.0005549999769 -9.99944962 0.001090000034 -14.99899905  
8.007379532 -0.00297999951 0.0008660000167 -0.02960000000 -0.00147000017 -5.001470089 0.0007830000250 -9.999217033 0.001550000045 -14.99845028  
8.038059235 -0.00927999882 -0.00193999987 -0.00734000011 -0.00383999903 -5.003839970 0.0005629999976 -9.999437322 0.001339999959 -14.99866009  
8.068739937 0.001530000085 0.002629999932 -0.002629999932 -5.002629999932 -5.002629999932 -5.002629999932 -5.002629999932 -5.002629999932 -14.99866009  
8.099418640 -0.005460000131 -0.002039999894 -0.003160000080 -0.001750000054 -5.001749992 -0.0008490000037 -10.00084877 0.0002960000129 -14.99970436  
8.130098343 -0.0353999947 -5.000000077e-05 -0.03530000150 0.001150000026 -4.998849869 -0.001410000026 -10.00140953 0.0002059999970 -14.99979401  
8.160778046 -0.0733999825 0.002369999886 -0.07580000162 0.003329999978 -4.996697969 -0.00147000017 -10.00146961 0.0005099999835 -14.99948978  
8.191457748 -0.0989999980 0.003749999916 -0.1036785990 0.00378999988 -4.996210098 -0.000539999883 -10.0005367 0.0009190000128 -14.99908066  
8.222137441 -0.0987000184 0.001099999108 -0.1021712273 0.00239999940 -4.997469926 6.140000000e-05 -10.00000000 -14.99870023  
8.252816209 -0.0564200032 0.001300000232 0.005050000000 -0.005050000000 -4.999498844 0.0005340000059 -9.999166305 -0.0005680000177 -14.99943161  
8.283495903 -0.007079999894 -3.360000119e-05 -0.007050000131 -0.0009800000116 -5.000979900 0.001359999959 -9.998640060 0.0004149999877 -15.00041485  
8.314175606 0.05490000173 -0.000169999945 0.05609999970 -0.0009560000035 -5.000956059 0.001320000039 -9.998680115 -0.001359999968 -15.00135018  
8.344855309 0.09950000048 -0.0008149999776 0.1003003716 0.000659999892 -4.999343872 0.0007750000223 -9.999224663 -0.002249999903 -15.00224972  
8.375535011 0.111926569 0.0009270000155 0.1101656333 0.003040000098 -4.996960163 8.559999856e-07 -9.999999046 -0.002110000001 -15.00210953  
8.406214714 0.08590000123 0.00320999995 0.08269999921 0.00490000058 -4.995100021 -0.0006479999865 -10.00064754 -0.001040000003 -15.00104066

8.436894417 0.03290000185 0.00488999982 0.02800000086 0.00517999982 -4.994820118 -0.000914999823 -10.00091457 0.0006239999784 -14.99937630  
8.467574120 -0.03040000051 0.00516999986 -0.03550000116 0.00165000039 -4.996439979 -0.00075000017 -10.00075245 0.00223999979 -14.99737979  
8.498253822 -0.08380000293 0.00353999947 -0.08730000257 0.000636000116 -4.399363899 -0.0003180000058 -10.00031757 0.00322000071 -14.99678040  
8.528933525 -0.1110515371 0.0008420000086 -0.1118937805 -0.002430000110 -5.002429962 0.0001180000036 -9.999881744 0.003150000004 -14.99685001  
8.559613228 -0.1045306697 -0.00199000019 -0.1025439575 -0.004439999815 -5.004439831 0.0003309999884 -9.999669075 0.002120000077 -14.99787998  
8.592091977 -0.0662999727 -0.00393000123 -0.06239999831 -0.004790000152 -5.004789829 0.0002519999980 -9.999748230 0.0006089999806 -14.99939060  
8.620971680 -0.007280000020 -0.004439999815 -0.002839999972 -0.003659999929 -5.003660202 -8.979999620e-06 -10.0000858 -0.0007689999766 -15.00076866  
8.651651382 0.05649999992 -0.00359000095 0.00910000035 -0.001840000041 -5.001840115 -0.000236000071 -10.00023556 -0.00150999973 -15.00150967  
8.682310185 0.1075085774 -0.002039999934 0.1095437407 -0.0003359999973 -5.000336170 -0.0002320000058 -10.00023174 -0.0014700000017 -15.00146961  
8.713010788 0.1316097528 -0.0005649999948 0.1321752369 0.0002130000066 -4.999786854 7.010000263e-05 -9.999929428 -0.0008479999960 -15.00084782  
8.743690491 0.1216423586 0.0002280000044 0.1214139685 -0.0002349999995 -5.000235081 0.0005660000024 -9.999434471 -0.0001019999982 -15.00010204  
8.774370193 0.07899999652 0.0002169999934 0.07970000058 -0.001159999985 -5.001160145 0.0010400000003 -9.998959541 0.0003459999862 -14.99965382  
8.805049896 0.01840000041 -0.0002880000102 0.01869999990 -0.001850000001 -5.001850128 0.0012600000048 -9.998740136 0.0003020000004 -14.99969769  
8.835729599 -0.04470000044 -0.0007709999918 -0.04390000119 -0.001760000014 -5.001760006 0.0011099999854 -9.998899923 -0.0001180000036 -15.00011826  
8.866409302 -0.09000000358 -0.0008219999727 -0.08919999748 -0.0008789999993 -5.000878811 0.0006430000067 -9.999357224 -0.0005859999801 -15.00058556  
8.897089005 -0.1041654125 -0.0003560000041 -0.1038096324 0.0003670000006 -4.999632835 3.750000178e-05 -9.999962807 -0.0007600000245 -15.00076008  
8.927767754 -0.08519999683 0.0003589999978 -0.08550000191 0.001329999999 -4.998670101 -0.0004839999892 -10.00048447 -0.0004830000107 -15.00048256  
8.958447456 -0.04369999841 0.0008750000270 -0.04459999874 0.001509999973 -4.998489857 -0.0007580000092 -10.00075817 0.0001270000066 -14.99987316  
8.989127159 0.0005923999752 0.0008233999879 -0.000230999982 0.00082300000260 -4.999170780 -0.0007479999913 -10.00074769 0.0007430000114 -14.99925709  
9.019806862 0.02730000019 0.0001270000066 0.02710000053 -0.000370000049 -5.000337124 -0.0005430000019 -10.00054264 0.001010000007 -14.99899006  
9.050486565 0.02439999953 -0.0009539999883 0.02539999969 -0.001389999990 -5.001389980 -0.0002939999977 -10.00029373 0.0007259999984 -14.99927425  
9.081166267 -0.005189999938 -0.001939999987 -0.003250000067 -0.001780000050 -5.001780033 -0.0001329999941 -10.00013256 -2.580000000e-05 -15.00002575  
9.111845970 -0.04430000111 -0.002369999886 -0.04190000147 -0.001329999999 -5.001329899 -0.0001069999998 -10.00010681 -0.0009379999829 -15.00093842  
9.14252673 0.06849999726 -0.002030000091 -0.06650000066 -0.0002329999988 -5.000233173 -0.0001720000000 -10.00017166 -0.001619999995 -15.00162029  
9.173203376 -0.05829999968 -0.001010000007 -0.05730000138 0.001019999967 -4.998980045 -0.0002349999995 -10.00023460 -0.001799999969 -15.00179958  
9.203885078 -0.009399999864 0.0002720000048 -0.009669999592 0.001919999951 -4.998079777 -0.0002149999927 -10.00021458 -0.0014299999946 -15.00142956  
9.234563828 0.06279999763 0.001339999959 0.06150000010 0.002169999992 -4.997829914 -9.460000001e-05 -10.00009441 -0.0007329999935 -15.00073338  
9.265243530 0.1280339360 0.001829999965 0.1262003332 0.001799999969 -4.998199940 7.229999756e-05 -9.999927521 -3.949999882e-05 -15.00003910  
9.295923233 0.1542673260 0.001649999991 0.1526158154 0.001090000034 -4.998909950 0.0001950000005 -9.999805450 0.0003670000006 -14.99963284  
9.326602936 0.1230347306 0.000996000170 0.1220387369 0.0003900000038 -4.999618441 0.0001999999949 -9.999799728 0.0003980000038 -14.99960232  
9.357282639 0.04010000080 0.000250000119 0.03979999945 -8.42999980e-06 -5.000008583 7.460000052e-05 -9.999925613 0.0001840000041 -14.99981594  
9.387962341 -0.06440000236 -0.0002010000026 -0.06419999897 -6.739999662e-05 -5.000067234 -0.0001250000059 -10.00012493 -8.840000191e-06 -15.00000858  
9.418642044 -0.1472993429 -0.0001360000024 -0.1471634358 0.000149999992 -4.999895096 -0.0003030000080 -10.00030327 6.230000145e-05 -14.99993801  
9.449321747 -0.1710973829 0.0004130000016 -0.1715101004 0.0003140000044 -4.999685764 -0.0003750000033 -10.00037479 0.0004740000004 -14.99952602  
9.480001450 -0.1215743870 0.001180000021 -0.1227585077 0.0004049999989 -4.999595165 -0.0003070000093 -10.00030708 0.0010900000034 -14.99990995  
9.510681152 -0.01610000059 0.001810000045 -0.01789999940 0.0003239999933 -4.999676228 -0.0001309999934 -10.00013065 0.0016100000036 -14.99839020  
9.541360855 0.1022627428 0.001960000023 0.1003050208 0.0001160000029 -4.999884129 8.009999874e-05 -9.999919891 0.001760000014 -14.99824047  
9.572040558 0.1822054833 0.0001490000053 0.1807117760 -0.0001420000044 -5.000142097 0.0002479999966 -9.999752045 0.001389999990 -14.99860954  
9.602719307 0.1871075034 0.0005130000063 0.1865948439 -0.0003879999858 -5.000388145 0.0003279999946 -9.999671936 0.0005729999975 -14.99942684  
9.63399010 0.1117626503 -0.0006830000202 0.1124453172 -0.0006029999931 -5.000603199 0.0003229999957 -9.999676704 -0.0004030000127 -15.00040340  
9.664078712 -0.01420000009 -0.001700000023 -0.01250000019 -0.0007820000174 -5.000782013 0.0002709999972 -9.999729156 -0.001189999981 -15.00119019  
9.694758415 -0.1388285458 -0.002189999912 -0.1366547373 -0.0009019999980 -5.000902176 0.0002180000010 -9.999781609 -0.001509999973 -15.00150967  
9.725438118 -0.2101816535 -0.002020000014 -0.2081652135 -0.0009100000101 -5.000911236 0.0001889999985 -9.999811172 -0.0012900000044 -15.00129032  
9.756117821 -0.1997023672 -0.001249999972 -0.1984479725 -0.0007539999788 -5.000753880 0.0001639999973 -9.999820709 -0.0006789999898 -15.00067902  
9.786797523 -0.1145963296 -0.0002079999977 -0.1143883020 -0.0004290000070 -5.000429153 0.0001639999973 -9.999835968 5.709999823e-05 -14.99994278  
9.817477226 0.005859999817 0.0007239999832 0.005129999947 -2.099999983e-05 -5.000020981 0.0001199999970 -9.999879837 0.0006249999860 -14.99937534  
9.848156929 0.1087287515 0.001200000057 0.1070282171 0.0002140000044 -4.999655764 4.379999828e-05 -9.999856131 0.0008430000162 -14.99915605  
9.878836632 0.1519750804 0.001069999998 0.1509070396 0.0004210000043 -4.999578953 -4.769999941e-05 -10.00004768 0.0006949999952 -14.99930477  
9.909516335 0.1235399172 0.0004239999980 0.1231160089 0.0002439999953 -4.999758589 -0.0001259999990 -10.00012589 0.0003060000017 -14.99969387  
9.940195084 0.04589999840 -0.0004279999994 0.04639999941 -0.0001250000059 -5.000124931 -0.0001729999931 -10.00017262 -0.0001300000004 -15.00012970  
9.970874786 -0.03579999879 -0.001109999954 -0.03469999880 -0.0004680000129 -5.000467777 -0.0001869999978 -10.00018692 -0.0004539999936 -15.00045395
